# Supplementary material for: Modeling time-variation over the business cycle (1960–2017): an international perspective
Source: publisher site journal article supplement (doi:10.1515/snde-2017-0101), 2018-11-22
Supplement: Supplementary file 3 [file Figure2&3.xlsx]

## Sheet: README
Modeling Time-Variation Over the Business Cycle (1960-2017): An International Perspective
Enrique Martinez-Garcia
Federal Reserve Bank of Dallas and SMU
emg.economics@gmail.com
Date: 10/1/2018

## Sheet: Real GDP
Q1/1960 !Q mag=bil	.excel_last	B111GDPC@OECDNAQ	B112GDPC@OECDNAQ	B132GDPC@OECDNAQ	B134GDPC@OECDNAQ	B136GDPC@OECDNAQ	B156GDPC@OECDNAQ	B158GDPC@OECDNAQ	B184GDPC@OECDNAQ
.DESC		United States: Gross Domestic Product (SAAR, Bil.2010.US$, PPP)	United Kingdom: Gross Domestic Product (SAAR, Bil.2010.US$, PPP)	France: Gross Domestic Product (SAAR, Bil.2010.US$, PPP)	Germany: Gross Domestic Product (SAAR, Bil.2010.US$, PPP)	Italy: Gross Domestic Product (SAAR, Bil.2010.US$, PPP)	Canada: Gross Domestic Product (SAAR, Bil.2010.US$, PPP)	Japan: Gross Domestic Product (SAAR, Bil.2010US$, PPP)	Spain: Gross Domestic Product (SAAR, Bil.2010.US$, PPP)
.T1		Q1-1947	Q1-1955	Q1-1960	Q1-1960	Q1-1960	Q1-1960	Q1-1960	Q1-1960
.TN		Q1-2018	Q1-2018	Q1-2018	Q1-2018	Q1-2018	Q1-2018	Q1-2018	Q1-2018
.LSOURCE		Organization for Economic Cooperation & Development	Organization for Economic Cooperation & Development	Organization for Economic Cooperation & Development	Organization for Economic Cooperation & Development	Organization for Economic Cooperation & Development	Organization for Economic Cooperation & Development	Organization for Economic Cooperation & Development	Organization for Economic Cooperation & Development
.DTLM		Jun-29-2018 05:33	Jul-02-2018 06:06	Jun-26-2018 05:33	May-16-2018 06:21	Jun-04-2018 06:05	Jun-01-2018 05:26	Jun-08-2018 05:25	Jun-01-2018 05:26
Q1/1960	1960-03-31	3161.31	674.925	544.545	901.678	527.496	271.921	559.92	227.419
Q2/1960	1960-06-30	3149.31	670.087	546.59	917.725	535.238	266.692	560.95	232.094
Q3/1960	1960-09-30	3157.15	680.251	550.682	949.448	543.098	270.762	580.22	238.587
Q4/1960	1960-12-31	3118.94	684.405	557.209	959.152	543.515	271.658	602.52	243.39
Q1/1961	1961-03-31	3140.14	695.555	566.171	968.856	562.988	270.559	620.83	250.346
Q2/1961	1961-06-30	3198.51	698.355	575.231	963.63	574.898	277.363	634.07	261.465
Q3/1961	1961-09-30	3251.85	694.704	584.39	983.409	588.297	284.062	646.23	266.805
Q4/1961	1961-12-31	3317.75	693.595	594.319	987.889	599.552	288.039	675.88	274.333
Q1/1962	1962-03-31	3377.51	696.867	605.019	1002.44	608.425	295.666	684.96	280.823
Q2/1962	1962-06-30	3413.9	703.344	614.794	1012.89	614.976	297.815	694.53	287.356
Q3/1962	1962-09-30	3446.42	707.617	623.646	1037.15	618.668	301.723	703.02	294.393
Q4/1962	1962-12-31	3459.8	705.066	631.452	1034.91	627.957	307.856	717.71	295.183
Q1/1963	1963-03-31	3498.29	708.701	620.934	998.711	632.126	309.703	727.52	312.164
Q2/1963	1963-06-30	3543.9	739.096	648.661	1043.5	649.455	314.244	748.93	312.423
Q3/1963	1963-09-30	3613.08	742.856	670.059	1079.7	660.115	316.659	770.89	319.164
Q4/1963	1963-12-31	3638.86	759.352	672.145	1084.92	666.903	326.605	797.45	325.106
Q1/1964	1964-03-31	3717.57	763.921	684.799	1099.85	676.789	334.7	822.89	326.945
Q2/1964	1964-06-30	3761.78	777.109	691.366	1113.29	669.941	335.852	842.74	332.333
Q3/1964	1964-09-30	3812.87	780.174	699.844	1124.86	668.809	339.384	855.76	334.829
Q4/1964	1964-12-31	3826.39	792.045	706.168	1140.16	666.01	341.174	866.46	342.109
Q1/1965	1965-03-31	3920.76	789.835	707.736	1158.82	675.002	351.892	873.5	349.39
Q2/1965	1965-06-30	3974.36	790.676	725.345	1177.11	688.461	355.193	884.41	350.88
Q3/1965	1965-09-30	4055.08	797.246	735.826	1184.94	697.631	359.991	904.45	354.452
Q4/1965	1965-12-31	4150.72	802.183	746.071	1192.03	708.112	368.844	918.51	365.048
Q1/1966	1966-03-31	4253.21	803.506	752.802	1213.68	714.96	375.897	943.09	362.564
Q2/1966	1966-06-30	4270.63	808.173	764.188	1217.41	725.144	383.813	979.99	381.3
Q3/1966	1966-09-30	4301.05	810.839	772.903	1218.91	745.629	383.666	1003.82	388.864
Q4/1966	1966-12-31	4337.93	807.447	777.123	1199.87	749.202	388.295	1023.88	389.917
Q1/1967	1967-03-31	4377.75	818.441	790.44	1193.9	764.149	387.394	1051.01	390.991
Q2/1967	1967-06-30	4381.59	829.928	799.092	1190.17	780.585	395.522	1079.29	395.689
Q3/1967	1967-09-30	4419.42	833.579	806.733	1218.91	792.614	396.84	1116.71	402.476
Q4/1967	1967-12-31	4454.99	838.018	814.596	1234.58	808.276	398.341	1138.3	399.581
Q1/1968	1968-03-31	4545.46	868.486	838.298	1249.03	810.241	401.574	1165.46	408.108
Q2/1968	1968-06-30	4622.22	864.726	774.747	1258.74	827.213	412.479	1205.22	420.49
Q3/1968	1968-09-30	4655.51	881.933	862.861	1286.37	847.102	418.049	1232.51	423.881
Q4/1968	1968-12-31	4676.23	885.464	871.701	1305.79	866.933	423.811	1302.73	441.062
Q1/1969	1969-03-31	4748.94	883.494	873.303	1338.65	880.51	429.303	1314.19	456.711
Q2/1969	1969-06-30	4764.17	889.95	894.726	1355.82	896.41	431.365	1352.45	455.168
Q3/1969	1969-09-30	4793.99	894.97	903.184	1384.95	898.554	435.916	1384.85	463.659
Q4/1969	1969-12-31	4773.07	899.549	910.322	1406.23	880.391	442.055	1438.9	468.85
Q1/1970	1970-03-31	4764.61	893.803	927.721	1383.79	933.183	444.846	1482.99	477.616
Q2/1970	1970-06-30	4773.04	914.879	939.429	1438.81	939.996	444.663	1500.98	478.375
Q3/1970	1970-09-30	4815.32	923.949	952.368	1465.68	958.855	449.199	1541.21	480.819
Q4/1970	1970-12-31	4765.79	932.024	967.322	1478.11	959.927	449.957	1536.25	484.613
Q1/1971	1971-03-31	4893.4	926.522	968.57	1449.71	954.906	447.261	1550.25	488.398
Q2/1971	1971-06-30	4921.32	943.07	986.217	1480.14	958.936	460.339	1575.25	497.924
Q3/1971	1971-09-30	4959.8	959.478	1002.3	1505.74	972.982	473.026	1594.45	507.086
Q4/1971	1971-12-31	4974.28	963.274	1010.89	1504.48	978.475	478.398	1608.97	517.296
Q1/1972	1972-03-31	5063.54	964.286	1024.13	1506	989.285	476.534	1661.39	525.689
Q2/1972	1972-06-30	5180.79	990.096	1028.06	1530.59	988.837	490.084	1692.66	538.11
Q3/1972	1972-09-30	5228.54	992.788	1037.19	1566.34	1002.17	491.2	1728.79	549.932
Q4/1972	1972-12-31	5315.37	1008.32	1054.41	1590.68	1006.93	502.95	1772.28	560.826
Q1/1973	1973-03-31	5446.22	1058.29	1075.42	1612.67	1016.01	516.211	1831.56	571.149
Q2/1973	1973-06-30	5507.97	1059.8	1087.04	1624.59	1046.46	521.845	1848.31	581.332
Q3/1973	1973-09-30	5478.04	1049.66	1096.37	1629.91	1079.75	523.613	1853.7	590.933
Q4/1973	1973-12-31	5529.12	1045.2	1110.39	1633.97	1106.13	533.476	1876.61	600.657
Q1/1974	1974-03-31	5483.19	1016.71	1121.04	1647.79	1115.1	537.361	1812.13	610.858
Q2/1974	1974-06-30	5497.6	1031.38	1126.65	1646.52	1125.75	543.307	1825.18	618.576
Q3/1974	1974-09-30	5444.38	1038.07	1137.28	1646.52	1127.62	542.668	1848.53	622.942
Q4/1974	1974-12-31	5422.6	1023	1120.1	1625.73	1104.05	540.134	1838.51	623.354
Q1/1975	1975-03-31	5357.09	1023.5	1115.07	1616.35	1084.84	536.479	1840.92	620.225
Q2/1975	1975-06-30	5398.36	1006.76	1117.88	1608.23	1084.29	543.495	1881.79	619.71
Q3/1975	1975-09-30	5487.57	1003.37	1122.21	1625.73	1099.7	553.643	1903.2	622.417
Q4/1975	1975-12-31	5561.56	1014.7	1137.37	1657.67	1112.02	560.03	1923.22	626.792
Q1/1976	1976-03-31	5687.15	1031	1154.06	1672.57	1131.61	569.764	1939.51	633.021
Q2/1976	1976-06-30	5730.12	1029.17	1167.82	1697.42	1152.06	582.079	1950.97	640.328
Q3/1976	1976-09-30	5759.25	1041.98	1173.34	1697.92	1181.34	584.614	1978.4	646.538
Q4/1976	1976-12-31	5802.48	1063.96	1187.96	1729.36	1201.83	585.849	1980.75	651.503
Q1/1977	1977-03-31	5869.99	1064.49	1201.09	1744.13	1202.31	593.944	2024.08	656.664
Q2/1977	1977-06-30	5985.2	1056.77	1206.32	1754.02	1195.62	597.319	2038.32	659.643
Q3/1977	1977-09-30	6091.09	1064.09	1211.85	1753.51	1184.43	600.194	2052.22	661.835
Q4/1977	1977-12-31	6091.73	1082.54	1214.61	1783.68	1194.58	609.754	2080.06	666.256
Q1/1978	1978-03-31	6112.92	1091.88	1231.48	1791.03	1214.1	614.97	2119.35	670.416
Q2/1978	1978-06-30	6350.6	1105.08	1251.96	1798.13	1235.1	620.613	2139.95	671.774
Q3/1978	1978-09-30	6412.7	1120.03	1250.86	1821.71	1241.6	625.085	2167.63	670.95
Q4/1978	1978-12-31	6498.71	1130.24	1261.5	1843.01	1260.52	630.398	2198.91	669.957
Q1/1979	1979-03-31	6511.62	1125.81	1272.35	1845.29	1280.44	635.821	2231.79	668.889
Q2/1979	1979-06-30	6519.5	1175.72	1284.52	1902.59	1289.75	644.448	2272.57	669.929
Q3/1979	1979-09-30	6566.32	1150.02	1299.2	1902.59	1312.07	648.618	2289.9	671.54
Q4/1979	1979-12-31	6583.31	1162.09	1301.67	1914.25	1342.95	652.98	2299.86	673.9
Q1/1980	1980-03-31	6604.61	1150.79	1316.23	1929.59	1340.49	657.595	2308.66	678.413
Q2/1980	1980-06-30	6470.66	1128.01	1308.7	1917.17	1350.89	657.379	2296.49	680.719
Q3/1980	1980-09-30	6460.85	1126.61	1308.69	1909.56	1352.02	656.488	2347.93	678.02
Q4/1980	1980-12-31	6580.59	1114.65	1307.9	1907.03	1363.54	665.648	2397.83	681.952
Q1/1981	1981-03-31	6716.78	1112.88	1312.4	1929.72	1355.76	680.443	2412.53	678.091
Q2/1981	1981-06-30	6667.73	1115.59	1318.86	1924.9	1358.41	687.951	2442.05	677.34
Q3/1981	1981-09-30	6744.24	1127.72	1329.44	1929.97	1359.04	681.786	2436.62	680.352
Q4/1981	1981-12-31	6665.56	1129.02	1336.66	1928.45	1370.07	678.68	2454.41	679.673
Q1/1982	1982-03-31	6554.06	1130.78	1347.28	1935.67	1369.53	670.607	2492.02	682.471
Q2/1982	1982-06-30	6589.77	1143.49	1356.64	1923.76	1365.63	662.876	2509.13	685.063
Q3/1982	1982-09-30	6566.03	1146.51	1357.38	1904.74	1364.9	657.032	2520.1	689.675
Q4/1982	1982-12-31	6572.44	1154.59	1365.5	1909.31	1360.94	650.968	2555.12	692.106
Q1/1983	1983-03-31	6658.52	1175.5	1371	1926.61	1364.74	661.674	2556.73	694.635
Q2/1983	1983-06-30	6810.47	1185.52	1371.16	1946.89	1363.1	674.824	2575.95	698.925
Q3/1983	1983-09-30	6943.81	1198.58	1373.26	1942.84	1388.48	682.47	2614.5	699.953
Q4/1983	1983-12-31	7087.01	1208.94	1379.71	1969.71	1419.26	691.153	2636.28	704.476
Q1/1984	1984-03-31	7227.81	1217.28	1388.95	1995.76	1416.48	703.006	2666.64	710.303
Q2/1984	1984-06-30	7354.76	1206.66	1393.01	1964.32	1421.04	716.757	2707.02	708.113
Q3/1984	1984-09-30	7427.11	1214.51	1400.87	2017.82	1437.77	719.799	2740.1	714.28
Q4/1984	1984-12-31	7486.36	1238.64	1404.28	2034.81	1438	731.144	2744.83	715.192
Q1/1985	1985-03-31	7560.78	1249.09	1406.83	2023.71	1446.23	742.25	2812.1	723.173
Q2/1985	1985-06-30	7630	1275.7	1416.31	2044	1465.33	744.634	2869.04	722.494
Q3/1985	1985-09-30	7748.7	1276.91	1425.45	2070.62	1477.07	754.061	2906.59	729.984
Q4/1985	1985-12-31	7806.83	1280.01	1431.13	2083.04	1486.91	765.663	2945.2	738.368
Q1/1986	1986-03-31	7879.19	1294.59	1436.41	2071.13	1496.18	765.494	2956.91	740.45
Q2/1986	1986-06-30	7915.36	1304.07	1451.91	2094.96	1505.86	769.901	2949.64	758.084
Q3/1986	1986-09-30	7995.03	1309.76	1457.85	2110.42	1520.89	770.883	2966.92	752.74
Q4/1986	1986-12-31	8036.43	1332.88	1461.36	2131.47	1527.13	765.329	2990.32	757.548
Q1/1987	1987-03-31	8092.62	1344.77	1465.32	2077.97	1533.39	783.054	2988.18	773.064
Q2/1987	1987-06-30	8183.46	1364.19	1482.09	2124.62	1556.61	793.207	3050.8	784.63
Q3/1987	1987-09-30	8257.68	1397.18	1493.4	2139.33	1561.1	805.358	3111.82	800.834
Q4/1987	1987-12-31	8393.98	1412.99	1516.22	2173.55	1577.9	815.815	3191.95	817.217
Q1/1988	1988-03-31	8441.18	1438.55	1535.88	2153.84	1601.12	827.748	3268.14	819.844
Q2/1988	1988-06-30	8552.72	1447.15	1546.11	2192.89	1611.29	835.103	3263.37	829.873
Q3/1988	1988-09-30	8602.08	1469.29	1566.55	2217.73	1632.47	835.171	3336.18	844.834
Q4/1988	1988-12-31	8716.02	1481.95	1581.96	2243.85	1651.96	841.04	3371.33	842.94
Q1/1989	1989-03-31	8803.95	1488.4	1603.35	2267.3	1662.22	850.632	3462.29	862.817
Q2/1989	1989-06-30	8873.18	1498.11	1616.23	2276.43	1669.41	853.9	3417.09	871.308
Q3/1989	1989-09-30	8939.42	1499.51	1635.28	2297.21	1686.81	856.982	3476.87	882.981
Q4/1989	1989-12-31	8958.33	1500.86	1654.72	2323.83	1704.17	855.145	3584.6	881.515
Q1/1990	1990-03-31	9056.41	1511.09	1666.15	2372.07	1710.96	863.172	3567.54	889.237
Q2/1990	1990-06-30	9091.43	1518.87	1674.05	2383.73	1716.18	859.583	3680.06	904.351
Q3/1990	1990-09-30	9093.68	1503.11	1680.13	2433.93	1718.93	853.413	3741.77	901.652
Q4/1990	1990-12-31	9016.16	1498.07	1684.98	2476.78	1707.76	845.763	3734.66	935.749
Q1/1991	1991-03-31	8973.85	1493.86	1682.25	2548.49	1741.47	833.527	3767.2	917.767
Q2/1991	1991-06-30	9043.49	1492.04	1691.82	2537.91	1731.93	837.339	3811.89	928.957
Q3/1991	1991-09-30	9086.9	1488.63	1695.01	2525.08	1732.56	838.408	3803.45	935.973
Q4/1991	1991-12-31	9126.57	1491	1704.16	2557.8	1752.89	839.919	3830.17	940.629
Q1/1992	1992-03-31	9234.38	1490.88	1719.43	2598.77	1757.6	840.471	3831.36	950.014
Q2/1992	1992-06-30	9336.2	1489.06	1719.59	2581.77	1756.6	841.483	3844.77	937.626
Q3/1992	1992-09-30	9426.96	1498.6	1719.17	2574.08	1752.7	846.012	3849.3	938.225
Q4/1992	1992-12-31	9521.42	1509.12	1715.44	2568.62	1740.62	850.799	3824.76	932.112
Q1/1993	1993-03-31	9539.17	1520.17	1703.63	2546.01	1738.19	856.214	3867.86	923.415
Q2/1993	1993-06-30	9595.9	1527.89	1706.03	2547.29	1733.99	864.004	3843.37	923.353
Q3/1993	1993-09-30	9642.69	1540.19	1708.65	2565.25	1731.26	872.255	3815.78	934.462
Q4/1993	1993-12-31	9771.42	1550.67	1712.52	2563.65	1743.95	876.006	3839.82	937.984
Q1/1994	1994-03-31	9867.22	1569.54	1723.77	2595.01	1757.24	888.896	3871.57	945.742
Q2/1994	1994-06-30	10002.1	1587.76	1743.44	2603.99	1769.95	901.923	3851.38	947.815
Q3/1994	1994-09-30	10061.1	1605.79	1753.37	2623.55	1780.99	913.445	3900.31	955.341
Q4/1994	1994-12-31	10175.3	1614.94	1769.97	2658.2	1797.71	920.072	3882.46	958.916
Q1/1995	1995-03-31	10210.1	1620.13	1778.44	2646.09	1820.28	928.56	3921.44	969.164
Q2/1995	1995-06-30	10245.8	1625.98	1787.09	2669.18	1821.56	928.876	3969.99	975.829
Q3/1995	1995-09-30	10333.5	1641.95	1789.32	2678.16	1829.66	930.089	4014.2	980.471
Q4/1995	1995-12-31	10406.8	1646.57	1790.14	2676.88	1844.81	933.86	4023.8	987.378
Q1/1996	1996-03-31	10475.1	1661.42	1802.15	2650.1	1852.81	934.441	4061.5	993.75
Q2/1996	1996-06-30	10658	1666.71	1806.52	2687.95	1843.15	940.945	4107.56	1000.07
Q3/1996	1996-09-30	10756.6	1678.1	1817.41	2704.31	1847.31	949.201	4106.39	1009.82
Q4/1996	1996-12-31	10870.2	1694.07	1819.23	2719.38	1846.21	956.75	4153.69	1013.86
Q1/1997	1997-03-31	10953.1	1726.73	1826.07	2703.02	1851.18	969.373	4168.08	1025.4
Q2/1997	1997-06-30	11118.3	1741.99	1847.24	2741.2	1876.33	980.289	4137.03	1034.77
Q3/1997	1997-09-30	11259.9	1750.54	1860.61	2751.78	1887.64	992.001	4150.43	1045.23
Q4/1997	1997-12-31	11347.3	1768.69	1880.55	2771.35	1918.67	1001.51	4152.7	1060.33
Q1/1998	1998-03-31	11459.5	1782.13	1897.27	2793.56	1906.2	1015.55	4102.5	1070.87
Q2/1998	1998-06-30	11570.7	1798.29	1913.67	2784.58	1913.57	1015.99	4087.2	1078.96
Q3/1998	1998-09-30	11722	1811.7	1928.05	2791.96	1916.12	1025.42	4093.58	1091.9
Q4/1998	1998-12-31	11914.5	1829.32	1942.3	2791.31	1907.22	1039.27	4128.92	1103.37
Q1/1999	1999-03-31	12009.6	1839.66	1953.7	2813.69	1918.49	1058.11	4072.1	1112.31
Q2/1999	1999-06-30	12108.6	1840.8	1969.94	2819.78	1926.7	1066.99	4091.93	1129.08
Q3/1999	1999-09-30	12261	1873.65	1992.75	2849.29	1942.79	1083.61	4111.44	1142.57
Q4/1999	1999-12-31	12473.9	1899.41	2017.9	2884.9	1970.32	1099.02	4111.11	1156.01
Q1/2000	2000-03-31	12510.1	1915.44	2039.08	2912	1993.23	1116.56	4191.21	1174.45
Q2/2000	2000-06-30	12746.3	1927.15	2057.75	2941.51	2007.44	1129.86	4199.97	1188.86
Q3/2000	2000-09-30	12761.7	1932.56	2071.54	2937.34	2018.27	1141.27	4203.4	1201.77
Q4/2000	2000-12-31	12834.2	1935.77	2089.12	2939.59	2049.38	1143.3	4242.74	1215.03
Q1/2001	2001-03-31	12797.7	1961.34	2099.62	2987.62	2056.87	1149.25	4267.84	1227.15
Q2/2001	2001-06-30	12865.6	1976.77	2103.65	2990.19	2051.26	1152.22	4247.34	1236.91
Q3/2001	2001-09-30	12824.9	1991.5	2110.42	2981.53	2042.57	1151.35	4200.25	1249.22
Q4/2001	2001-12-31	12860.5	2000.37	2110.46	2985.06	2043.57	1158.41	4189.06	1258.07
Q1/2002	2002-03-31	12978.9	2009.87	2116.7	2975.84	2041.9	1175.66	4194.01	1265.23
Q2/2002	2002-06-30	13050.5	2023.13	2127.79	2983.53	2051.94	1182.36	4226.62	1274.75
Q3/2002	2002-09-30	13114	2038.46	2135.41	2997.65	2056.35	1192.7	4243.4	1282.46
Q4/2002	2002-12-31	13122.4	2056.74	2136.2	2991.23	2064.33	1199.3	4254.61	1292.09
Q1/2003	2003-03-31	13190.3	2070.26	2139.41	2954.99	2058.16	1205.91	4249.92	1304.84
Q2/2003	2003-06-30	13312.7	2089.86	2134.78	2955.63	2051.67	1204.12	4283.91	1313.7
Q3/2003	2003-09-30	13535.7	2111.23	2148.55	2970.38	2054.03	1208.66	4301.23	1322.72
Q4/2003	2003-12-31	13694	2128.29	2165.89	2981.29	2070.47	1216.95	4349.01	1336.3
Q1/2004	2004-03-31	13772.7	2139.93	2185.07	2980.57	2080.04	1225.72	4382.81	1344.42
Q2/2004	2004-06-30	13873.7	2148.13	2198.92	2990.83	2086.8	1240.21	4381.3	1354.85
Q3/2004	2004-09-30	13999.8	2151.68	2207.47	2985.38	2088.79	1254.96	4404.19	1368.5
Q4/2004	2004-12-31	14120.8	2157.1	2222.54	2988.27	2092.21	1263.97	4392.51	1376.92
Q1/2005	2005-03-31	14271.3	2177.55	2228.43	2982.49	2087	1268.28	4413.65	1390.84
Q2/2005	2005-06-30	14345.8	2201.7	2232.83	3002.38	2107.27	1277.31	4448.18	1405.02
Q3/2005	2005-09-30	14466.3	2227.46	2243.76	3026.76	2121.33	1293.03	4490.56	1418.34
Q4/2005	2005-12-31	14549	2260.83	2259.55	3038.31	2127.29	1305.83	4500.07	1433.18
Q1/2006	2006-03-31	14723.8	2266.85	2278.43	3066.61	2134.88	1316.3	4503.47	1448.7
Q2/2006	2006-06-30	14767.8	2271.9	2300.78	3115.69	2147.46	1316.93	4519.14	1463.83
Q3/2006	2006-09-30	14781	2273.36	2301.24	3146.81	2155.08	1320.59	4511.36	1478.28
Q4/2006	2006-12-31	14896.7	2281.38	2318.35	3187.86	2183.14	1325.58	4566.5	1492.32
Q1/2007	2007-03-31	14905.9	2304.08	2336.39	3200.93	2186.65	1334.15	4600.08	1507.58
Q2/2007	2007-06-30	15019.9	2320.7	2355.01	3224.67	2184.46	1347.02	4605.5	1519.81
Q3/2007	2007-09-30	15120.9	2340.36	2362.34	3251.94	2183.66	1352.62	4584.71	1532.14
Q4/2007	2007-12-31	15174.9	2359.83	2368.71	3260.92	2180.43	1354.51	4607.89	1545.32
Q1/2008	2008-03-31	15071.3	2368.23	2378.68	3289.55	2204.63	1355.32	4621.83	1552.37
Q2/2008	2008-06-30	15146.1	2350.7	2367.97	3280.57	2182.95	1360.02	4598.47	1553.24
Q3/2008	2008-09-30	15073.5	2311.99	2359.72	3268.7	2152.42	1371.36	4539.65	1541.5
Q4/2008	2008-12-31	14755	2261.78	2327.08	3205.5	2103.61	1355.5	4436.68	1525.97
Q1/2009	2009-03-31	14550.6	2224.18	2288.74	3061.72	2045.71	1324.53	4219.79	1501.57
Q2/2009	2009-06-30	14530.9	2219.96	2285.62	3063.97	2029.46	1309.92	4308.8	1487.03
Q3/2009	2009-09-30	14578.4	2223.12	2289.29	3082.25	2041.03	1315.85	4309.96	1482.4
Q4/2009	2009-12-31	14719.5	2230.82	2304.9	3110.48	2049.06	1331.39	4371.41	1481.47
Q1/2010	2010-03-31	14783.2	2240.88	2314.47	3133.33	2057.68	1347.25	4410.23	1485.94
Q2/2010	2010-06-30	14926	2260.12	2326.86	3197.49	2068.98	1354.18	4464.92	1488.65
Q3/2010	2010-09-30	15026.8	2273.19	2341.15	3223.47	2079.91	1363.85	4546.09	1489.37
Q4/2010	2010-12-31	15121.5	2276.15	2357.07	3250.41	2093.26	1379.27	4512.47	1489.35
Q1/2011	2011-03-31	15063.1	2293.22	2381.72	3307.83	2099.74	1389.46	4444.58	1483.98
Q2/2011	2011-06-30	15172.6	2296.6	2383.24	3313.6	2101.08	1392.1	4421.12	1476.87
Q3/2011	2011-09-30	15204.6	2302.78	2388.28	3329.32	2088.8	1411.42	4528.66	1470.86
Q4/2011	2011-12-31	15375.8	2306.61	2394.39	3329.96	2069.98	1422.58	4522	1462.14
Q1/2012	2012-03-31	15477.8	2321.55	2395.95	3340.47	2051.81	1423.03	4575.74	1449.45
Q2/2012	2012-06-30	15550.1	2320.3	2394.17	3343.68	2033	1427.73	4545.28	1435.66
Q3/2012	2012-09-30	15568.7	2347.93	2397.67	3351.37	2023.84	1430.54	4527.27	1425.05
Q4/2012	2012-12-31	15572.2	2342.56	2396.34	3336.3	2012.56	1432.29	4537.13	1411.13
Q1/2013	2013-03-31	15681.1	2357.7	2395.57	3328.92	1991.9	1447.05	4591.55	1406.29
Q2/2013	2013-06-30	15711.1	2370.63	2411.9	3358.43	1992.08	1456.43	4630.55	1405.11
Q3/2013	2013-09-30	15832.4	2391.88	2411.72	3375.43	1998.78	1468.36	4665.95	1404.15
Q4/2013	2013-12-31	15986.8	2403.08	2421.77	3389.23	1996.38	1483.16	4664.48	1408.16
Q1/2014	2014-03-31	15950	2423.22	2423.59	3419.06	1997.08	1485.01	4709.88	1413.72
Q2/2014	2014-06-30	16130.5	2443.39	2429.61	3413.28	1995.66	1502.81	4623.55	1419.19
Q3/2014	2014-09-30	16336.6	2460.51	2440.46	3424.19	2000.45	1513.75	4621.71	1428.84
Q4/2014	2014-12-31	16418.3	2476.89	2443.14	3454.66	2000.5	1520.63	4650.55	1439.56
Q1/2015	2015-03-31	16549.7	2487.88	2453.42	3458.51	2005.05	1517.59	4720.26	1454.7
Q2/2015	2015-06-30	16661.9	2502.03	2452.88	3473.91	2013.38	1515.39	4716.89	1467.05
Q3/2015	2015-09-30	16729.5	2512.86	2462.19	3485.13	2017.86	1523.96	4720.97	1480.83
Q4/2015	2015-12-31	16749.7	2531.54	2468.36	3499.89	2023.64	1525.54	4706.36	1494.41
Q1/2016	2016-03-31	16774	2539.75	2484.55	3522.02	2028.31	1534.95	4746.28	1505.61
Q2/2016	2016-06-30	16867	2543.72	2478.87	3538.38	2030.27	1530.92	4756.65	1517.46
Q3/2016	2016-09-30	16983.1	2555.72	2483.79	3550.25	2034.94	1547.02	4765.62	1528.29
Q4/2016	2016-12-31	17057.2	2574.67	2498.88	3565.01	2044.77	1555.6	4777.47	1538.72
Q1/2017	2017-03-31	17109.7	2584.76	2518.18	3597.08	2055.14	1570.96	4809.68	1550.82
Q2/2017	2017-06-30	17239.1	2590.26	2534.76	3619.86	2063.23	1588.57	4835.06	1564.23
Q3/2017	2017-09-30	17373.5	2599.36	2552.05	3646.48	2070.31	1595.08	4859.03	1575.12
Q4/2017	2017-12-31	17497.6	2608.6	2569.32	3668.61	2077.59	1601.86	4871.43	1585.77
Q1/2018	2018-03-31	17584	2614.73	2573.4	3679.52	2083.44	1607.2	4864.1	1596.81

## Sheet: GDP Deflator
		GDP Deflator Index									Q1/1960 !Q	.excel_last	B111GDP@OECDNAQ	B112GDP@OECDNAQ	B132GDP@OECDNAQ	B134GDP@OECDNAQ	B136GDP@OECDNAQ	B156GDP@OECDNAQ	B158GDP@OECDNAQ	B184GDP@OECDNAQ
		United States: Gross Domestic Product Implicit Deflator	United Kingdom: Gross Domestic Product Implicit Deflator	France: Gross Domestic Product Implicit Deflator	Germany: Gross Domestic Product Implicit Deflator	Italy: Gross Domestic Product Implicit Deflator	Canada: Gross Domestic Product Implicit Deflator	Japan: Gross Domestic Product Implicit Deflator	Spain: Gross Domestic Product Implicit Deflator		.DESC		United States: Gross Domestic Product (SAAR, Mil.US$, PPP)	United Kingdom: Gross Domestic Product (SAAR, Mil.US$, PPP)	France: Gross Domestic Product (SAAR, Mil.US$, PPP)	Germany: Gross Domestic Product (SAAR, Mil.US$, PPP)	Italy: Gross Domestic Product (SAAR, Mil.US$, PPP)	Canada: Gross Domestic Product (SAAR, Mil.US$, PPP)	Japan: Gross Domestic Product (SAAR, Bil.US$, PPP)	Spain: Gross Domestic Product (SAAR, Mil.US$, PPP)
											.T1		Q1-1947	Q1-1955	Q1-1960	Q1-1960	Q1-1960	Q1-1960	Q1-1960	Q1-1960
											.TN		Q1-2018	Q1-2018	Q1-2018	Q1-2018	Q1-2018	Q1-2018	Q1-2018	Q1-2018
											.LSOURCE		Organization for Economic Cooperation & Development	Organization for Economic Cooperation & Development	Organization for Economic Cooperation & Development	Organization for Economic Cooperation & Development	Organization for Economic Cooperation & Development	Organization for Economic Cooperation & Development	Organization for Economic Cooperation & Development	Organization for Economic Cooperation & Development
											.DTLM		Jun-29-2018 05:33	Jul-02-2018 06:06	Jun-26-2018 05:33	Jun-20-2018 10:29	Jun-20-2018 10:29	Jun-20-2018 10:29	Jun-20-2018 10:30	Jun-20-2018 10:30
Q1/1960	1960-03-31	17.3974	17.4871	15.8701	17.3613	15.9884	17.2491	17.1287	15.0254		Q1/1960	22006	543347	114863	84609.6	154069	84190.5	46336	94.76	34477.7
Q2/1960	1960-06-30	17.4428	17.5591	15.9299	17.3796	16.0244	17.2736	17.1694	15.0791		Q2/1960	22097	542697	114509	85247.6	156975	85618.6	45509.4	95.16	35312.3
Q3/1960	1960-09-30	17.5058	17.6102	15.9929	17.3623	16.0889	17.323	17.2236	15.1508		Q3/1960	22189	546012	116585	86225.4	162240	87225.6	46336	98.74	36472.7
Q4/1960	1960-12-31	17.5596	17.6825	16.0439	17.3234	16.1332	17.376	17.2681	15.2068		Q4/1960	22281	541063	117778	87526	163531	87532.7	46631.5	102.8	37344.4
Q1/1961	1961-03-31	17.5986	17.716	16.081	17.2319	16.1735	17.387	17.2936	15.2374		Q1/1961	22371	545949	119923	89138.9	164313	90895.4	46472.2	106.08	38489.3
Q2/1961	1961-06-30	17.6407	17.7241	16.1085	17.1865	16.2126	17.4198	17.3315	15.2693		Q2/1961	22462	557430	120461	90720.4	162997	93042.9	47730.9	108.58	40282.7
Q3/1961	1961-09-30	17.6875	17.8347	16.1514	17.1868	16.2496	17.4613	17.3813	15.2967		Q3/1961	22554	568228	120579	92410.5	166345	95428.5	49000.2	110.98	41179.3
Q4/1961	1961-12-31	17.7449	17.8544	16.2028	17.2341	16.2986	17.5129	17.4469	15.3448		Q4/1961	22646	581624	120519	94279.3	167562	97547.4	49833.1	116.51	42474.3
Q1/1962	1962-03-31	17.8371	17.936	16.2943	17.3527	16.3871	17.5914	17.5554	15.4222		Q1/1962	22736	595176	121642	96519.2	171202	99528.5	51381.9	118.81	43698.4
Q2/1962	1962-06-30	17.8664	17.9868	16.3189	17.4021	16.4196	17.6195	17.5977	15.4532		Q2/1962	22827	602580	123120	98226.7	173478	100800	51838.1	120.76	44804.7
Q3/1962	1962-09-30	17.9033	18.0242	16.3476	17.4495	16.4494	17.6637	17.6386	15.4866		Q3/1962	22919	609575	124125	99816	178117	101589	52650	122.52	46001.4
Q4/1962	1962-12-31	17.9382	18.0767	16.3751	17.4854	16.4778	17.7057	17.6696	15.5221		Q4/1962	23011	613132	124038	101235	178098	103292	53848.1	125.3	46230.3
Q1/1963	1963-03-31	18.017	18.1215	16.4439	17.5554	16.5535	17.7939	17.7346	15.5862		Q1/1963	23101	622679	124987	99967.5	172556	104456	54441	127.48	49091.9
Q2/1963	1963-06-30	18.0467	18.1668	16.4809	17.5796	16.5792	17.8332	17.7533	15.6151		Q2/1963	23192	631835	130673	104666	180543	107486	55361	131.37	49223.8
Q3/1963	1963-09-30	18.0688	18.1974	16.5007	17.5986	16.5945	17.8623	17.7701	15.635		Q3/1963	23284	644960	131559	108249	187009	109351	55877.5	135.35	50350
Q4/1963	1963-12-31	18.2156	18.3439	16.6245	17.7407	16.7335	18.0014	17.9144	15.7544		Q4/1963	23376	654840	135563	109401	189431	111401	58081.4	141.15	51679
Q1/1964	1964-03-31	18.274	18.3785	16.6847	17.7994	16.7922	18.0409	17.9755	15.8023		Q1/1964	23467	671149	136636	111864	192672	113448	59651.4	146.15	52129.1
Q2/1964	1964-06-30	18.3178	18.4429	16.7247	17.8433	16.8353	18.087	18.0217	15.8363		Q2/1964	23558	680757	139482	113207	195507	112589	60010.1	150.06	53102.3
Q3/1964	1964-09-30	18.3922	18.53	16.7978	17.9168	16.9021	18.1644	18.1011	15.9091		Q3/1964	23650	692807	140693	115096	198353	112845	60900.5	153.05	53747.1
Q4/1964	1964-12-31	18.4758	18.611	16.8799	17.9988	16.9829	18.2517	18.1895	15.9917		Q4/1964	23742	698424	143458	116704	201971	112910	61516.1	155.72	55200.8
Q1/1965	1965-03-31	18.5687	18.7164	16.9682	18.0896	17.0693	18.3469	18.2862	16.0599		Q1/1965	23832	719248	143868	117575	206312	115016	63779.4	157.82	56616.2
Q2/1965	1965-06-30	18.6525	18.7805	17.0366	18.1717	17.1374	18.4439	18.3742	16.1335		Q2/1965	23923	732369	144515	120986	210518	117777	64718.1	160.56	57118
Q3/1965	1965-09-30	18.7259	18.8607	17.1039	18.2439	17.2072	18.5238	18.4471	16.2013		Q3/1965	24015	750184	146338	123220	212763	119832	65876.4	164.85	57942.1
Q4/1965	1965-12-31	18.8534	18.986	17.2171	18.3691	17.3264	18.6525	18.5746	16.3107		Q4/1965	24107	773104	148222	125761	215504	122476	67965.5	168.57	60077.1
Q1/1966	1966-03-31	18.9755	19.1115	17.3299	18.4895	17.4422	18.7774	18.6872	16.412		Q1/1966	24197	797328	149448	127728	220856	124486	69728.9	174.13	60038.8
Q2/1966	1966-06-30	19.131	19.2661	17.4747	18.6413	17.585	18.9301	18.8346	16.5542		Q2/1966	24288	807153	151532	130743	223354	127293	71776.4	182.37	63688.6
Q3/1966	1966-09-30	19.3168	19.4613	17.6415	18.8219	17.7522	19.1115	19.0146	16.702		Q3/1966	24380	820798	153572	133496	225795	132134	72436.4	188.59	65531.7
Q4/1966	1966-12-31	19.4809	19.6404	17.7927	18.9801	17.8959	19.2643	19.1749	16.8412		Q4/1966	24472	834864	154338	135375	224137	133842	73896.6	193.98	66257.1
Q1/1967	1967-03-31	19.5622	19.7079	17.8699	19.0573	17.9769	19.3479	19.2519	16.9197		Q1/1967	24562	846046	156976	138293	223928	137130	74045	199.92	66749.2
Q2/1967	1967-06-30	19.6608	19.8253	17.9592	19.1541	18.0726	19.4458	19.3495	17.0099		Q2/1967	24653	851058	160128	140505	224363	140825	75981.1	206.34	67911.4
Q3/1967	1967-09-30	19.8488	19.9992	18.134	19.3406	18.2411	19.622	19.5349	17.163		Q3/1967	24745	866614	162243	143229	232017	144328	76924.8	215.54	69698
Q4/1967	1967-12-31	20.0672	20.2234	18.3215	19.5601	18.4387	19.8375	19.7503	17.3757		Q4/1967	24837	883201	164936	146120	237668	148774	78063.9	222.13	70054.2
Q1/1968	1968-03-31	20.2899	20.448	18.5183	19.787	18.6514	20.0601	19.9735	17.5691		Q1/1968	24928	911135	172831	151987	243238	150857	79580.6	230	72345.3
Q2/1968	1968-06-30	20.504	20.6775	18.7398	20.0022	18.8499	20.2618	20.1863	17.7529		Q2/1968	25019	936297	174014	142145	247795	155656	82563.4	240.38	75320.1
Q3/1968	1968-09-30	20.7063	20.8703	18.907	20.2018	19.0323	20.4583	20.3839	17.9127		Q3/1968	25111	952347	179131	159724	255762	160941	84490	248.23	76610.9
Q4/1968	1968-12-31	20.9995	21.1591	19.1782	20.4859	19.2909	20.7414	20.6689	18.156		Q4/1968	25203	970129	182337	163675	263274	166946	86839.9	266.04	80799.4
Q1/1969	1969-03-31	21.217	21.3749	19.3953	20.6918	19.4895	20.9585	20.8806	18.3522		Q1/1969	25293	995419	183787	165833	272611	171307	88885.9	271.13	84569.9
Q2/1969	1969-06-30	21.4879	21.628	19.6235	20.9499	19.7406	21.2318	21.143	18.5784		Q2/1969	25384	1011361	187322	171899	279553	176647	90477.7	282.53	85323
Q3/1969	1969-09-30	21.7903	21.9578	19.8933	21.2384	20.0307	21.533	21.4399	18.863		Q3/1969	25476	1032016	191251	175911	289491	179671	92728.8	293.36	88246.1
Q4/1969	1969-12-31	22.0709	22.3114	20.1474	21.5057	20.289	21.8236	21.7156	19.1011		Q4/1969	25568	1040741	195326	179565	297640	178310	95303.8	308.73	90360.6
Q1/1970	1970-03-31	22.3817	22.7537	20.4284	21.8024	20.5601	22.1574	22.0262	19.3856		Q1/1970	25658	1053528	197925	185549	296930	191527	97372.6	322.74	93421
Q2/1970	1970-06-30	22.6938	23.1331	20.7222	22.1018	20.8722	22.4799	22.3427	19.6495		Q2/1970	25749	1070110	205970	190593	312975	195854	98749.2	331.35	94843.1
Q3/1970	1970-09-30	22.8803	23.3877	20.914	22.2814	21.0405	22.6833	22.5436	19.8096		Q3/1970	25841	1088461	210302	195007	321413	201394	100659	343.29	96104.4
Q4/1970	1970-12-31	23.1819	23.7299	21.2107	22.5742	21.296	22.9859	22.8634	20.0639		Q4/1970	25933	1091462	215244	200878	328397	204068	102174	347.04	98106.4
Q1/1971	1971-03-31	23.5361	24.0868	21.5926	22.9227	21.5997	23.3523	23.2485	20.376		Q1/1971	26023	1137812	217190	204760	327060	205895	103181	356.1	100410
Q2/1971	1971-06-30	23.8456	24.392	21.892	23.2255	21.8627	23.6624	23.5805	20.6293		Q2/1971	26114	1159355	223871	211381	338335	209282	107608	367.01	103642
Q3/1971	1971-09-30	24.0884	24.6374	22.135	23.4631	22.0842	23.8967	23.8323	20.8355		Q3/1971	26206	1180313	230058	217212	347709	214499	111669	375.45	106604
Q4/1971	1971-12-31	24.2883	24.8779	22.3217	23.6581	22.2958	24.1006	24.0324	21.0112		Q4/1971	26298	1193585	233223	220921	350303	217777	113901	382.05	109667
Q1/1972	1972-03-31	24.6642	25.269	22.659	24.0243	22.6899	24.4715	24.3956	21.3451		Q1/1972	26389	1233807	237138	227197	356085	224075	115203	400.46	113218
Q2/1972	1972-06-30	24.8155	25.4633	22.8145	24.172	22.8523	24.6147	24.5327	21.4727		Q2/1972	26480	1270122	245357	229635	364126	225576	119172	410.29	116586
Q3/1972	1972-09-30	25.048	25.7298	23.0626	24.3999	23.0652	24.8412	24.7465	21.6698		Q3/1972	26572	1293837	248599	234193	376144	230747	120542	422.7	120241
Q4/1972	1972-12-31	25.3661	26.1384	23.3846	24.7117	23.3622	25.1475	25.0461	21.9367		Q4/1972	26664	1332023	256498	241405	386870	234829	124948	438.58	124133
Q1/1973	1973-03-31	25.6609	26.4434	23.7106	25.0025	23.6644	25.4302	25.3164	22.1809		Q1/1973	26754	1380680	272350	249647	396834	240011	129684	458.14	127825
Q2/1973	1973-06-30	26.0516	26.7784	24.1431	25.3847	24.034	25.8184	25.6849	22.5229		Q2/1973	26845	1417595	276193	256948	405877	251064	133100	469.06	132110
Q3/1973	1973-09-30	26.5491	27.3902	24.6954	25.87	24.4813	26.3045	26.1633	22.9662		Q3/1973	26937	1436813	279800	265082	414992	263874	136066	479.19	136935
Q4/1973	1973-12-31	27.0774	28.0253	25.2955	26.3845	24.9133	26.8317	26.6718	23.4387		Q4/1973	27029	1479069	285072	274995	424299	275090	141407	494.54	142051
Q1/1974	1974-03-31	27.5919	28.607	25.8884	26.8846	25.4211	27.345	27.1673	23.9053		Q1/1974	27119	1494654	283059	284140	435997	282973	145162	486.42	147340
Q2/1974	1974-06-30	28.2481	29.38	26.5621	27.5232	26.0304	27.9962	27.8137	24.4647		Q2/1974	27210	1534220	294902	292995	446012	292522	150263	501.58	152693
Q3/1974	1974-09-30	29.0667	30.248	27.3241	28.3212	26.7859	28.8289	28.6373	25.1394		Q3/1974	27302	1563396	305583	304244	458943	301514	154551	523.04	158012
Q4/1974	1974-12-31	29.9227	31.1453	28.0676	29.1569	27.5367	29.6839	29.5102	25.8754		Q4/1974	27394	1603004	310079	307803	466519	303487	158391	536.06	162745
Q1/1975	1975-03-31	30.6014	31.8652	28.5735	29.8207	28.1206	30.3869	30.228	26.4761		Q1/1975	27484	1619553	317403	311941	474387	304530	161045	549.82	165688
Q2/1975	1975-06-30	31.0592	32.3879	28.9083	30.268	28.5141	30.8696	30.7133	26.8947		Q2/1975	27575	1656448	317334	316393	479085	308632	165743	571.05	168167
Q3/1975	1975-09-30	31.6124	32.9746	29.3728	30.806	28.9966	31.4334	31.283	27.3752		Q3/1975	27667	1713812	321993	322723	492905	318317	171921	588.26	171920
Q4/1975	1975-12-31	32.1393	33.5652	29.8513	31.3169	29.4485	31.9388	31.811	27.8145		Q4/1975	27759	1765867	331461	332408	510927	326898	176701	604.48	175906
Q1/1976	1976-03-31	32.4733	33.9584	30.2003	31.6379	29.7534	32.2448	32.1298	28.0957		Q1/1976	27850	1824509	340731	341230	520801	336102	181494	615.71	179450
Q2/1976	1976-06-30	32.8027	34.3279	30.5556	31.9567	30.1517	32.572	32.4469	28.3766		Q2/1976	27941	1856944	343828	349361	533863	346758	187299	625.46	183337
Q3/1976	1976-09-30	33.2265	34.7691	30.9948	32.3691	30.5739	32.9622	32.8657	28.7425		Q3/1976	28033	1890500	352580	356058	540914	360549	190368	642.44	187502
Q4/1976	1976-12-31	33.8148	35.4019	31.5692	32.9436	31.1627	33.5465	33.4531	29.2451		Q4/1976	28125	1938413	366571	367176	560708	373868	194152	654.7	192246
Q1/1977	1977-03-31	34.3592	35.9772	32.1019	33.4775	31.7133	34.1038	33.9976	29.7093		Q1/1977	28215	1992534	372713	377498	574661	380624	200105	679.91	196844
Q2/1977	1977-06-30	34.8416	36.5126	32.5933	33.9513	32.1829	34.6018	34.483	30.1361		Q2/1977	28306	2060165	375516	384943	586098	384110	204180	694.47	200578
Q3/1977	1977-09-30	35.2699	36.9639	33.0391	34.3723	32.5637	35.0525	34.9143	30.5262		Q3/1977	28398	2122387	382792	391997	593195	385019	207835	707.95	203850
Q4/1977	1977-12-31	36.036	37.7689	33.7972	35.1225	33.2123	35.8108	35.6863	31.1832		Q4/1977	28490	2168716	397909	401908	616571	396052	215713	733.42	209628
Q1/1978	1978-03-31	36.5729	38.4101	34.3444	35.6495	33.6623	36.3623	36.23	31.6605		Q1/1978	28580	2208688	408155	414089	628401	407979	220909	758.66	214165
Q2/1978	1978-06-30	37.2424	39.1439	35.0137	36.3029	34.2395	37.0474	36.9005	32.2431		Q2/1978	28671	2336563	420982	429177	642455	422152	227136	780.21	218548
Q3/1978	1978-09-30	37.8651	39.7875	35.6447	36.9082	34.7818	37.6791	37.5144	32.7921		Q3/1978	28763	2398866	433693	436526	661732	431096	232674	803.45	221996
Q4/1978	1978-12-31	38.6614	40.6334	36.4132	37.679	35.5017	38.4754	38.299	33.4753		Q4/1978	28855	2482159	446953	449734	683450	446723	239611	832.09	226286
Q1/1979	1979-03-31	39.3525	41.4071	37.0808	38.3447	36.182	39.1685	38.9682	34.0679		Q1/1979	28945	2531555	453675	461918	696384	462477	246025	859.29	229925
Q2/1979	1979-06-30	40.3041	42.3791	37.9688	39.2677	37.1063	40.1276	39.9034	34.8769		Q2/1979	29036	2595909	484909	477501	735293	477740	255470	895.99	235751
Q3/1979	1979-09-30	41.1649	43.4145	38.7702	40.1071	37.9731	40.9823	40.7488	35.6263		Q3/1979	29128	2670388	485898	493154	751011	497360	262600	921.95	241396
Q4/1979	1979-12-31	41.986	44.3005	39.5273	40.9123	38.8032	41.798	41.5572	36.3549		Q4/1979	29220	2730705	501019	503740	770784	520196	269627	944.33	247198
Q1/1980	1980-03-31	42.8594	45.2516	40.3258	41.7743	39.7205	42.65	42.4212	37.1486		Q1/1980	29311	2796523	506801	519666	793330	531516	277068	967.65	254287
Q2/1980	1980-06-30	43.8	46.3057	41.1688	42.6969	40.6058	43.5652	43.3449	37.9455		Q2/1980	29402	2799938	508340	527492	805631	547578	282920	983.51	260624
Q3/1980	1980-09-30	44.8082	47.4414	42.1126	43.6795	41.5424	44.5319	44.3441	38.8239		Q3/1980	29494	2860044	520161	539581	820901	560677	288806	1028.72	265600
Q4/1980	1980-12-31	46.0461	48.8685	43.2601	44.8795	42.6566	45.7134	45.5727	39.8774		Q4/1980	29586	2993525	530119	553950	842334	580623	300606	1079.69	274389
Q1/1981	1981-03-31	47.1962	50.1996	44.3328	45.9878	43.7131	46.7873	46.7168	40.8572		Q1/1981	29676	3131799	543697	569640	873406	591608	314506	1113.58	279539
Q2/1981	1981-06-30	48.0816	51.2182	45.1503	46.8422	44.546	47.6205	47.5968	41.6552		Q2/1981	29767	3167251	556076	583000	887413	604056	323638	1148.44	284684
Q3/1981	1981-09-30	48.9462	52.2052	45.963	47.6796	45.3472	48.4513	48.4576	42.4		Q3/1981	29859	3261203	572956	598253	905656	615205	326334	1166.61	291062
Q4/1981	1981-12-31	49.8631	53.283	46.8394	48.5721	46.2058	49.3282	49.3707	43.1923		Q4/1981	29951	3283536	585458	612973	921881	631942	330726	1197.27	296206
Q1/1982	1982-03-31	50.5612	54.11	47.5338	49.2559	46.858	50.062	50.0698	43.7919		Q1/1982	30041	3273809	595474	626999	938361	640608	331653	1232.83	301554
Q2/1982	1982-06-30	51.17	54.7867	48.1125	49.8525	47.418	50.6839	50.6827	44.3196		Q2/1982	30132	3331281	609698	639043	943882	646422	331903	1256.49	306347
Q3/1982	1982-09-30	51.9068	55.6232	48.7969	50.5729	48.1063	51.4078	51.42	44.9515		Q3/1982	30224	3367072	620641	648487	948057	655455	333675	1280.34	312806
Q4/1982	1982-12-31	52.4836	56.3274	49.3172	51.1366	48.6725	51.9865	51.9982	45.4638		Q4/1982	30316	3407810	632930	659321	960920	661241	334317	1312.73	317486
Q1/1983	1983-03-31	52.9073	56.8801	49.7114	51.5507	49.0258	52.3803	52.4143	45.8444		Q1/1983	30406	3480321	650712	667272	977481	667904	342390	1324.07	321314
Q2/1983	1983-06-30	53.2656	57.289	50.0515	51.9005	49.3592	52.7316	52.7655	46.1607		Q2/1983	30497	3583844	660979	671913	994475	671636	351536	1342.96	325529
Q3/1983	1983-09-30	53.8231	57.9222	50.5797	52.4447	49.8596	53.305	53.318	46.6307		Q3/1983	30589	3692257	675644	680043	1.00281e+06	691080	359385	1377.33	329327
Q4/1983	1983-12-31	54.219	58.3798	50.9491	52.8309	50.2684	53.6946	53.7017	46.9703		Q4/1983	30681	3796121	686871	688228	1.02417e+06	712192	366617	1398.8	333869
Q1/1984	1984-03-31	54.7964	58.9693	51.4853	53.3928	50.811	54.2632	54.2635	47.4711		Q1/1984	30772	3912774	698589	700130	1.04875e+06	718467	376854	1429.71	340220
Q2/1984	1984-06-30	55.2575	59.5273	51.91	53.8412	51.2332	54.7191	54.7122	47.8792		Q2/1984	30863	4015000	699050	707967	1.0409e+06	726769	387453	1463.36	342087
Q3/1984	1984-09-30	55.7056	60.0008	52.3207	54.277	51.6372	55.1648	55.1538	48.2576		Q3/1984	30955	4087378	709195	717598	1.0779e+06	741125	392267	1493.2	347793
Q4/1984	1984-12-31	56.0792	60.4215	52.6607	54.6405	51.987	55.532	55.5223	48.598		Q4/1984	31047	4147606	728354	724015	1.09425e+06	746265	401102	1505.77	350693
Q1/1985	1985-03-31	56.7241	60.8613	53.2672	55.2676	52.574	56.1529	56.1722	49.1498		Q1/1985	31137	4237010	739845	733684	1.10078e+06	759006	411747	1560.73	358633
Q2/1985	1985-06-30	57.0756	61.3299	53.6142	55.6075	52.9077	56.5286	56.527	49.4546		Q2/1985	31228	4302297	761426	743442	1.11865e+06	773913	415834	1602.39	360518
Q3/1985	1985-09-30	57.4065	61.7064	53.9351	55.9272	53.2123	56.8478	56.8598	49.7387		Q3/1985	31320	4394563	766826	752713	1.13973e+06	784603	423476	1632.92	366349
Q4/1985	1985-12-31	57.7381	62.2934	54.2425	56.2466	53.5275	57.1733	57.1893	49.9937		Q4/1985	31412	4453105	776001	760023	1.15312e+06	794514	432454	1664.2	372455
Q1/1986	1986-03-31	58.0203	62.4238	54.5091	56.517	53.7907	57.4576	57.467	50.2721		Q1/1986	31502	4516344	786485	766575	1.15203e+06	803396	434508	1678.93	375586
Q2/1986	1986-06-30	58.2526	62.7075	54.7282	56.7408	54.0051	57.6781	57.6903	50.4606		Q2/1986	31593	4555245	795842	777961	1.1699e+06	811816	438687	1681.31	385972
Q3/1986	1986-09-30	58.4873	62.9902	54.9552	56.9697	54.218	57.9171	57.9209	50.662		Q3/1986	31685	4619627	802920	784385	1.1833e+06	823151	441066	1697.92	384781
Q4/1986	1986-12-31	58.8129	63.3094	55.2581	57.2891	54.5246	58.246	58.2441	50.958		Q4/1986	31777	4669396	821230	790606	1.2018e+06	831205	440375	1720.86	389502
Q1/1987	1987-03-31	59.2404	63.7239	55.6412	57.7099	54.9174	58.6556	58.6696	51.2864		Q1/1987	31867	4736231	833981	798244	1.18024e+06	840622	453742	1732.19	400041
Q2/1987	1987-06-30	59.637	64.1761	56.0042	58.0995	55.2892	59.0516	59.0647	51.645		Q2/1987	31958	4821459	852033	812652	1.21488e+06	859130	462729	1780.4	408864
Q3/1987	1987-09-30	60.07	64.5628	56.4123	58.5237	55.6857	59.4742	59.4911	52.0432		Q3/1987	32050	4900509	877891	824820	1.23222e+06	867788	473180	1829.12	420526
Q4/1987	1987-12-31	60.5677	65.0595	56.8758	59.0105	56.1547	59.9693	59.9851	52.4893		Q4/1987	32142	5022670	894657	844303	1.26235e+06	884513	483313	1891.8	432807
Q1/1988	1988-03-31	61.0438	65.5804	57.32	59.474	56.6011	60.4502	60.4544	52.8828		Q1/1988	32233	5090615	918131	861930	1.26072e+06	904665	494315	1952.11	437454
Q2/1988	1988-06-30	61.6335	66.1213	57.8751	60.0481	57.1408	61.0239	61.0393	53.404		Q2/1988	32324	5207707	931243	876071	1.29597e+06	919094	503441	1968.12	447169
Q3/1988	1988-09-30	62.3598	66.9279	58.5556	60.7542	57.8069	61.7529	61.7564	54.0188		Q3/1988	32416	5299486	957019	898094	1.32607e+06	942024	509497	2035.67	460472
Q4/1988	1988-12-31	62.8595	67.3155	59.0269	61.2392	58.2867	62.2564	62.244	54.4655		Q4/1988	32508	5412713	970856	914225	1.35239e+06	961184	517260	2073.36	463238
Q1/1989	1989-03-31	63.5498	68.1228	59.6706	61.9083	58.9732	62.9138	62.9196	55.059		Q1/1989	32598	5527352	986775	936693	1.38146e+06	978546	528684	2152.41	479329
Q2/1989	1989-06-30	64.207	68.7095	60.2872	62.5467	59.5586	63.5814	63.5593	55.6247		Q2/1989	32689	5628429	1.00177e+06	953973	1.40132e+06	992532	536347	2145.91	489019
Q3/1989	1989-09-30	64.6725	69.3429	60.726	63.0011	59.9417	64.0516	64.0108	56.0308		Q3/1989	32781	5711556	1.01194e+06	972241	1.42439e+06	1.00933e+06	542263	2198.96	499189
Q4/1989	1989-12-31	65.1223	69.7183	61.1422	63.4422	60.287	64.4937	64.4474	56.4178		Q4/1989	32873	5763444	1.01834e+06	990546	1.45099e+06	1.02559e+06	544835	2282.56	501802
Q1/1990	1990-03-31	65.8408	70.5039	61.802	64.1477	60.9135	65.1955	65.1554	57.0354		Q1/1990	32963	5890835	1.03683e+06	1.00815e+06	1.49758e+06	1.04038e+06	555935	2296.65	511739
Q2/1990	1990-06-30	66.5205	71.3176	62.4304	64.8121	61.3765	65.8719	65.8279	57.6107		Q2/1990	33054	5974665	1.0542e+06	1.02323e+06	1.52053e+06	1.05148e+06	559367	2393.54	525686
Q3/1990	1990-09-30	67.1145	72.0492	62.9749	65.3898	61.8639	66.4689	66.4214	58.1214		Q3/1990	33146	6029504	1.05396e+06	1.0359e+06	1.56639e+06	1.06153e+06	560385	2455.62	528764
Q4/1990	1990-12-31	67.6223	72.603	63.4496	65.8807	62.3115	66.9739	66.9257	58.5711		Q4/1990	33238	6023332	1.05851e+06	1.04672e+06	1.60593e+06	1.06227e+06	559581	2469.56	553005
Q1/1991	1991-03-31	68.2968	73.3423	64.0826	66.5304	63.0307	67.6437	67.6057	59.1495		Q1/1991	33328	6054867	1.06628e+06	1.05545e+06	1.66872e+06	1.09573e+06	557000	2516.39	547734
Q2/1991	1991-06-30	68.7641	73.8893	64.5301	66.9834	63.4081	68.1061	68.0764	59.5653		Q2/1991	33419	6143612	1.07292e+06	1.06887e+06	1.6731e+06	1.09626e+06	563373	2563.97	558310
Q3/1991	1991-09-30	69.269	74.425	65.0072	67.4735	63.9051	68.5942	68.5835	60.0056		Q3/1991	33511	6218425	1.07823e+06	1.0788e+06	1.67683e+06	1.10525e+06	568134	2577.35	566685
Q4/1991	1991-12-31	69.643	74.8991	65.3563	67.8402	64.272	68.9531	68.9525	60.3578		Q4/1991	33603	6279296	1.08682e+06	1.09045e+06	1.70778e+06	1.12464e+06	572137	2609.42	572847
Q1/1992	1992-03-31	69.9426	75.0941	65.6426	68.1351	64.5838	69.2579	69.2497	60.6351		Q1/1992	33694	6380798	1.08957e+06	1.10504e+06	1.74269e+06	1.13314e+06	575043	2621.48	581220
Q2/1992	1992-06-30	70.3886	75.5593	66.0512	68.5721	64.9353	69.7059	69.6905	60.9996		Q2/1992	33785	6492299	1.09498e+06	1.11202e+06	1.74239e+06	1.13865e+06	579460	2647.4	577090
Q3/1992	1992-09-30	70.723	75.7028	66.371	68.8991	65.2652	70.0458	70.026	61.2981		Q3/1992	33877	6586548	1.10409e+06	1.11713e+06	1.74548e+06	1.1419e+06	585419	2663.28	580284
Q4/1992	1992-12-31	71.2014	76.1258	66.8224	69.3651	65.6694	70.5123	70.5039	61.6716		Q4/1992	33969	6697553	1.11805e+06	1.12229e+06	1.75356e+06	1.14105e+06	592652	2664.36	580016
Q1/1993	1993-03-31	71.6062	76.47	67.2298	69.758	66.0711	70.9128	70.9067	62.0261		Q1/1993	34059	6748182	1.13133e+06	1.12136e+06	1.74797e+06	1.14643e+06	599813	2709.78	577908
Q2/1993	1993-06-30	72.0417	77.0041	67.6411	70.1819	66.4756	71.3563	71.3477	62.4076		Q2/1993	34150	6829594	1.14502e+06	1.12981e+06	1.75948e+06	1.15066e+06	609055	2709.37	581423
Q3/1993	1993-09-30	72.4754	77.6904	68.0389	70.6042	66.8749	71.7565	71.7782	62.8005		Q3/1993	34242	6904222	1.16452e+06	1.1382e+06	1.78255e+06	1.15575e+06	618319	2706.15	592123
Q4/1993	1993-12-31	72.8531	78.4877	68.3693	70.9733	67.2146	72.1471	72.1557	63.1428		Q4/1993	34334	7032844	1.18448e+06	1.14632e+06	1.79075e+06	1.17014e+06	624360	2737.52	597593
Q1/1994	1994-03-31	73.2066	79.6214	68.6822	71.3199	67.5621	72.4983	72.5119	63.4339		Q1/1994	34424	7136259	1.21621e+06	1.15913e+06	1.8215e+06	1.18514e+06	636630	2773.78	605314
Q2/1994	1994-06-30	73.5715	79.7343	69.0094	71.6747	67.8936	72.8408	72.871	63.7588		Q2/1994	34515	7269847	1.23207e+06	1.17794e+06	1.8369e+06	1.19958e+06	649011	2772.98	609748
Q3/1994	1994-09-30	73.9693	79.0401	69.3911	72.059	68.239	73.2519	73.2677	64.0974		Q3/1994	34607	7352255	1.23522e+06	1.1912e+06	1.86062e+06	1.2132e+06	661013	2823.5	617853
Q4/1994	1994-12-31	74.3763	77.6267	69.8088	72.45	68.5956	73.6529	73.6659	64.4297		Q4/1994	34699	7476661	1.22004e+06	1.20972e+06	1.89542e+06	1.23099e+06	669454	2825.85	623381
Q1/1995	1995-03-31	74.8034	75.4265	70.2627	72.8575	68.9566	74.0778	74.0873	64.8142		Q1/1995	34789	7545296	1.18927e+06	1.22341e+06	1.8974e+06	1.253e+06	679526	2870.55	633803
Q2/1995	1995-06-30	75.1321	74.2239	70.5545	73.1819	69.2865	74.4056	74.4098	65.0882		Q2/1995	34880	7604923	1.17453e+06	1.23447e+06	1.92248e+06	1.25988e+06	682765	2918.74	640858
Q3/1995	1995-09-30	75.4896	73.9839	70.7885	73.5457	69.6426	74.7529	74.7607	65.4		Q3/1995	34972	7706531	1.18223e+06	1.2401e+06	1.93854e+06	1.27199e+06	686849	2965.16	646993
Q4/1995	1995-12-31	75.8617	74.6389	70.97	73.9356	70.0515	75.1206	75.1284	65.7494		Q4/1995	35064	7799493	1.19606e+06	1.24386e+06	1.94788e+06	1.29006e+06	693026	2986.87	655031
Q1/1996	1996-03-31	76.2723	76.171	71.3795	74.3755	70.4426	75.5178	75.5424	66.1406		Q1/1996	35155	7893146	1.23162e+06	1.25942e+06	1.93987e+06	1.30288e+06	697123	3031.47	663181
Q2/1996	1996-06-30	76.5627	77.4178	71.7982	74.6055	70.7049	75.8048	75.8303	66.4319		Q2/1996	35246	8061535	1.25576e+06	1.26989e+06	1.97366e+06	1.30092e+06	704644	3077.53	670340
Q3/1996	1996-09-30	76.7785	78.2352	71.958	74.6689	70.8702	76.0326	76.0446	66.6643		Q3/1996	35338	8159043	1.27769e+06	1.28038e+06	1.98736e+06	1.3069e+06	712961	3085.35	679239
Q4/1996	1996-12-31	77.168	78.6679	72.313	74.8056	71.1555	76.4346	76.4335	67.0286		Q4/1996	35430	8287078	1.29699e+06	1.28799e+06	2.00209e+06	1.31138e+06	722431	3136.85	685684
Q1/1997	1997-03-31	77.6469	78.5487	72.8601	74.9302	71.4825	76.9036	76.9107	67.4716		Q1/1997	35520	8402060	1.31999e+06	1.30261e+06	1.99337e+06	1.32095e+06	736455	3167.37	698075
Q2/1997	1997-06-30	77.8575	78.6353	73.221	74.8793	71.7579	77.0956	77.111	67.7865		Q2/1997	35611	8551940	1.33312e+06	1.32424e+06	2.02014e+06	1.34406e+06	746607	3151.96	707740
Q3/1997	1997-09-30	78.1354	78.9977	73.676	74.9784	72.2666	77.3731	77.3965	68.2549		Q3/1997	35703	8691756	1.34584e+06	1.34211e+06	2.03063e+06	1.36175e+06	758247	3173.88	719837
Q4/1997	1997-12-31	78.3952	78.6631	74.106	75.1452	72.9256	77.6318	77.6655	68.8122		Q4/1997	35795	8788320	1.35404e+06	1.36441e+06	2.04961e+06	1.39675e+06	768074	3186.65	736196
Q1/1998	1998-03-31	78.5229	78.4844	74.4077	75.2692	73.6725	77.7407	77.8083	69.3342		Q1/1998	35885	8889732	1.36122e+06	1.38215e+06	2.06945e+06	1.40189e+06	779936	3153.92	749152
Q2/1998	1998-06-30	78.6873	78.2292	74.6464	75.492	74.2138	77.9156	77.9669	69.7312		Q2/1998	35976	8994738	1.3691e+06	1.39857e+06	2.0689e+06	1.41765e+06	782031	3148.56	759137
Q3/1998	1998-09-30	78.9819	78.0829	74.9052	75.8883	74.6215	78.2072	78.235	69.9947		Q3/1998	36068	9146521	1.37673e+06	1.41396e+06	2.08527e+06	1.42734e+06	792239	3164.32	771142
Q4/1998	1998-12-31	79.2281	78.0417	75.0173	76.2973	74.7809	78.507	78.4253	70.0195		Q4/1998	36160	9325650	1.38939e+06	1.42654e+06	2.09603e+06	1.42374e+06	806020	3199.4	779521
Q1/1999	1999-03-31	79.6242	77.9287	75.1722	76.9068	74.7861	78.9793	78.7501	69.9695		Q1/1999	36250	9447103	1.39521e+06	1.43788e+06	2.12971e+06	1.43225e+06	825566	3168.44	785274
Q2/1999	1999-06-30	79.8916	77.9295	75.3605	77.2116	74.8133	79.2372	79.0395	69.9712		Q2/1999	36341	9557005	1.39609e+06	1.45346e+06	2.14278e+06	1.4389e+06	835217	3195.57	797134
Q3/1999	1999-09-30	80.1805	78.305	75.7372	77.3475	74.9621	79.3951	79.4524	70.1911		Q3/1999	36433	9712280	1.42786e+06	1.47764e+06	2.16902e+06	1.4538e+06	849918	3227.58	809192
Q4/1999	1999-12-31	80.5476	79.2335	76.3567	77.3638	75.2962	79.4748	80.0433	70.6637		Q4/1999	36525	9926101	1.46465e+06	1.50854e+06	2.19659e+06	1.48098e+06	862864	3251.32	824226
Q1/2000	2000-03-31	81.1635	80.8284	77.4071	77.421	75.9379	79.6964	80.9998	71.5429		Q1/2000	36616	10031031	1.50674e+06	1.54533e+06	2.21886e+06	1.51096e+06	879079	3354.28	847788
Q2/2000	2000-06-30	81.6229	82.0929	78.2563	77.5008	76.3772	79.9511	81.6798	72.1772		Q2/2000	36707	10278340	1.53967e+06	1.57659e+06	2.24366e+06	1.53054e+06	892394	3389.51	865800
Q3/2000	2000-09-30	82.1523	83.0648	79.1383	77.8323	76.7987	80.3971	82.3018	72.7876		Q3/2000	36799	10357445	1.56227e+06	1.60505e+06	2250062	1.54729e+06	906438	3418.11	882599
Q4/2000	2000-12-31	82.5937	83.6558	79.8886	78.2531	77.0403	80.9083	82.7011	73.2055		Q4/2000	36891	10472285	1.576e+06	1.63402e+06	2.26396e+06	1.57608e+06	913825	3466.84	897463
Q1/2001	2001-03-31	83.1127	83.7543	80.6786	78.95	77.2951	81.6558	83.0332	73.5858		Q1/2001	36981	10508121	1.59869e+06	1.65847e+06	2.32145e+06	1.58707e+06	927067	3501.35	911129
Q2/2001	2001-06-30	83.6993	84.2643	81.6266	79.7422	77.7258	82.2372	83.5931	74.284		Q2/2001	37072	10638384	1.62109e+06	1.68117e+06	2.34675e+06	1.59157e+06	936078	3508.03	927084
Q3/2001	2001-09-30	83.9735	84.4943	82.3724	80.2926	78.0013	82.2869	83.9729	74.9712		Q3/2001	37164	10639486	1.63762e+06	1.70199e+06	2.35611e+06	1.59044e+06	935934	3484.9	944974
Q4/2001	2001-12-31	84.2278	84.9745	83.2054	80.8658	78.3833	82.1502	84.4833	75.9095		Q4/2001	37256	10701317	1.65427e+06	1.71924e+06	2.37573e+06	1.59901e+06	940107	3496.74	963582
Q1/2002	2002-03-31	84.4976	85.7685	84.1848	81.4912	78.9315	81.9188	85.1602	77.1326		Q1/2002	37346	10834445	1.67765e+06	1.74462e+06	2.38671e+06	1.60888e+06	951426	3528.92	984681
Q2/2002	2002-06-30	84.8119	86.5114	84.7373	82.1029	79.4255	82.0894	85.7392	78.0611		Q2/2002	37437	10934752	1.70335e+06	1.76527e+06	2.41085e+06	1.62691e+06	958842	3580.54	1.00403e+06
Q3/2002	2002-09-30	85.1907	87.0578	84.8782	82.7281	79.9285	82.5199	86.1839	78.6928		Q3/2002	37529	11037057	1.7271e+06	1.77454e+06	2.4407e+06	1.64073e+06	972291	3613.4	1.01827e+06
Q4/2002	2002-12-31	85.6516	87.4659	84.6375	83.3744	80.4327	83.3352	86.5175	79.042		Q4/2002	37621	11103834	1.75075e+06	1.77016e+06	2.4545e+06	1.65749e+06	987337	3636.97	1.03047e+06
Q1/2003	2003-03-31	86.179	87.3927	84.0122	84.0281	80.9451	84.4974	86.734	79.0952		Q1/2003	37711	11230078	1.76079e+06	1.75972e+06	2.44377e+06	1.66306e+06	1.00662e+06	3642.05	1.04134e+06
Q2/2003	2003-06-30	86.4555	87.3285	83.3538	84.5009	81.0848	85.0942	86.7808	79.0957		Q2/2003	37802	11370653	1.77615e+06	1.74216e+06	2.45805e+06	1.66068e+06	1.01223e+06	3673.16	1.04842e+06
Q3/2003	2003-09-30	86.9345	88.081	83.1195	85.236	81.2909	85.7787	87.154	79.4525		Q3/2003	37894	11625137	1.80978e+06	1.74846e+06	2.49181e+06	1.66681e+06	1.02422e+06	3703.87	1.06038e+06
Q4/2003	2003-12-31	87.3467	88.8712	83.0228	85.9781	81.2172	86.1344	87.5791	79.9124		Q4/2003	37986	11816827	1.84076e+06	1.76053e+06	2.52274e+06	1.67863e+06	1.03551e+06	3763.28	1.07747e+06
Q1/2004	2004-03-31	88.1083	90.4136	83.4713	87.1363	81.3339	86.6221	88.47	80.8639		Q1/2004	38077	11988403	1.88296e+06	1.78571e+06	2.5561e+06	1.68881e+06	1.04889e+06	3831.11	1.09692e+06
Q2/2004	2004-06-30	88.8752	91.6142	84.0192	87.9963	81.4861	87.3249	89.2845	81.6896		Q2/2004	38168	12181398	1.91527e+06	1.80882e+06	2.59022e+06	1.69747e+06	1.0699e+06	3865.05	1.11672e+06
Q3/2004	2004-09-30	89.422	91.6229	84.4952	88.3198	81.431	87.9894	89.7749	82.1813		Q3/2004	38260	12367744	1.91861e+06	1.82614e+06	2.595e+06	1.69795e+06	1.09086e+06	3906.58	1.13476e+06
Q4/2004	2004-12-31	90.0493	91.1486	85.1846	88.3996	81.4982	88.93	90.2482	82.6124		Q4/2004	38352	12562163	1.91349e+06	1.85361e+06	2.59986e+06	1.70213e+06	1.11043e+06	3916.76	1.14773e+06
Q1/2005	2005-03-31	90.8839	90.3378	86.2317	88.3503	81.637	90.2951	90.8492	83.088		Q1/2005	38442	12813729	1.91445e+06	1.88137e+06	2.59339e+06	1.70077e+06	1.13132e+06	3961.82	1.16601e+06
Q2/2005	2005-06-30	91.5432	90.3721	87.1296	88.3988	82.0263	91.3652	91.3439	83.8902		Q2/2005	38533	12974083	1.93642e+06	1.90471e+06	2.61211e+06	1.72548e+06	1.15288e+06	4014.56	1.18927e+06
Q3/2005	2005-09-30	92.3995	90.9875	88.261	88.9043	82.9463	92.5143	92.1155	85.362		Q3/2005	38625	13205445	1.97241e+06	1.93889e+06	2.64838e+06	1.75648e+06	1.18175e+06	4087.04	1.22161e+06
Q4/2005	2005-12-31	93.1001	92.1365	89.299	89.5327	84.2031	93.3575	92.8065	87.2284		Q4/2005	38717	13381629	2.02724e+06	1.9755e+06	2.67727e+06	1.7881e+06	1.20433e+06	4126.42	1.26137e+06
Q1/2006	2006-03-31	93.8324	93.7694	90.4259	90.4797	85.7284	94.0058	93.6174	89.7048		Q1/2006	38807	13648904	2.06867e+06	2.01714e+06	2.7308e+06	1.82699e+06	1.22241e+06	4165.62	1.31123e+06
Q2/2006	2006-06-30	94.587	95.1033	91.4573	91.3908	87.1891	94.737	94.4305	91.7941		Q2/2006	38898	13799794	2.10277e+06	2.06016e+06	2.80244e+06	1.86907e+06	1.23251e+06	4216.42	1.35578e+06
Q3/2006	2006-09-30	95.2469	95.8254	92.3002	92.1446	88.269	95.369	95.1203	93.3141		Q3/2006	38990	13908498	2.12009e+06	2.07957e+06	2.85377e+06	1.89893e+06	1.24419e+06	4239.91	1.39184e+06
Q4/2006	2006-12-31	95.5799	95.467	92.7241	92.517	88.8341	95.6736	95.4465	94.0118		Q4/2006	39082	14066370	2.11961e+06	2.10464e+06	2.9027e+06	1.93597e+06	1.25287e+06	4306.45	1.41557e+06
Q1/2007	2007-03-31	96.654	95.2387	93.7898	93.5386	89.7943	96.7453	96.5106	94.9377		Q1/2007	39172	14233226	2.13559e+06	2.1454e+06	2.94678e+06	1.96005e+06	1.27509e+06	4386.48	1.44413e+06
Q2/2007	2007-06-30	97.1946	95.2795	94.4018	94.0957	90.5426	97.3074	97.0347	95.452		Q2/2007	39263	14422313	2.15192e+06	2.17661e+06	2.98631e+06	1.9744e+06	1.29488e+06	4415.5	1.46373e+06
Q3/2007	2007-09-30	97.5317	95.713	94.9043	94.5117	91.4088	97.6547	97.3719	95.8988		Q3/2007	39355	14569675	2.18002e+06	2.19501e+06	3.02488e+06	1.99256e+06	1.3049e+06	4410.84	1.48251e+06
Q4/2007	2007-12-31	97.9563	96.4856	95.5813	95.0675	92.6685	98.1745	97.8094	96.5546		Q4/2007	39447	14685330	2.2159e+06	2.21662e+06	3.05107e+06	2.01703e+06	1.31368e+06	4453.06	1.50549e+06
Q1/2008	2008-03-31	98.5161	98.1084	96.5077	95.8123	94.2912	98.8789	98.3927	97.5022		Q1/2008	39538	14668445	2.26119e+06	2.24754e+06	3.10197e+06	2.07513e+06	1.32389e+06	4493.17	1527202
Q2/2008	2008-06-30	98.9954	99.271	97.3406	96.6135	95.836	99.4659	98.8976	98.3503		Q2/2008	39629	14812974	2.27105e+06	2.25672e+06	3.11937e+06	2.08838e+06	1.33637e+06	4493.4	1.54134e+06
Q3/2008	2008-09-30	99.6737	100.4	98.3967	97.751	97.5129	100.114	99.6217	99.3747		Q3/2008	39721	14842983	2.25905e+06	2.27326e+06	3.14468e+06	2.09521e+06	1.35631e+06	4468.4	1.54563e+06
Q4/2008	2008-12-31	99.815	100.603	98.9178	98.5037	98.6021	100.034	99.7577	99.8311		Q4/2008	39813	14549949	2.21446e+06	2.25369e+06	3.10763e+06	2.07057e+06	1.33954e+06	4373.01	1.53709e+06
Q1/2009	2009-03-31	100.062	100.111	99.5963	99.4975	99.7338	100.086	100.032	100.375		Q1/2009	39903	14383885	2.167e+06	2.23176e+06	2.99818e+06	2.03669e+06	1.30962e+06	4170.66	1.52075e+06
Q2/2009	2009-06-30	99.895	99.5678	99.7765	99.8561	100.055	99.877	99.8924	100.164		Q2/2009	39994	14340417	2.15115e+06	2.23275e+06	3.01119e+06	2.02701e+06	1.29246e+06	4252.7	1.50286e+06
Q3/2009	2009-09-30	99.8732	99.8838	100.049	100.132	100.113	99.8479	99.886	99.8598		Q3/2009	40086	14384145	2.16105e+06	2.24245e+06	3.03752e+06	2.03976e+06	1.29793e+06	4253.57	1.49363e+06
Q4/2009	2009-12-31	100.17	100.438	100.578	100.515	100.098	100.189	100.19	99.601		Q4/2009	40178	14566511	2.18055e+06	2.26967e+06	3.07707e+06	2.04748e+06	1.31775e+06	4327.34	1.48883e+06
Q1/2010	2010-03-31	100.522	101.556	101.122	100.737	99.7523	100.57	100.521	99.1288		Q1/2010	40268	14681063	2.21478e+06	2.29142e+06	3.10653e+06	2.04899e+06	1.33853e+06	4380.21	1.48624e+06
Q2/2010	2010-06-30	100.968	102.545	101.765	101.201	99.8026	100.99	100.966	98.9638		Q2/2010	40359	14888600	2.25556e+06	2.31834e+06	3.18475e+06	2.06128e+06	1.35102e+06	4454.15	1.48647e+06
Q3/2010	2010-09-30	101.43	103.169	102.446	101.818	100.189	101.409	101.439	99.0142		Q3/2010	40451	15057660	2.2824e+06	2.34819e+06	3.23019e+06	2.0802e+06	1.36632e+06	4556.36	1.48794e+06
Q4/2010	2010-12-31	101.95	103.751	103.226	102.655	100.953	101.921	101.972	99.3302		Q4/2010	40543	15230208	2.29827e+06	2.38214e+06	3.28396e+06	2.1095e+06	1.38874e+06	4546.43	1.49267e+06
Q1/2011	2011-03-31	102.4	103.677	103.965	103.589	101.98	102.37	102.437	99.7902		Q1/2011	40633	15238371	2.31385e+06	2.4243e+06	3.37238e+06	2.13757e+06	1.40517e+06	4498.47	1.49418e+06
Q2/2011	2011-06-30	103.145	103.98	104.744	104.635	103.21	102.967	103.224	100.587		Q2/2011	40724	15460926	2.32402e+06	2.44402e+06	3.41239e+06	2.16474e+06	1.41605e+06	4509.08	1.4989e+06
Q3/2011	2011-09-30	103.768	104.191	105.121	105.347	104.205	103.278	103.874	101.324		Q3/2011	40816	15587125	2.33503e+06	2.45801e+06	3.45189e+06	2.17281e+06	1.44004e+06	4647.86	1.50373e+06
Q4/2011	2011-12-31	103.918	104.421	104.737	105.357	104.592	103.062	104.033	101.615		Q4/2011	40908	15785312	2.34405e+06	2.45528e+06	3.4529e+06	2.16125e+06	1.44838e+06	4648.12	1.4991e+06
Q1/2012	2012-03-31	104.466	105.158	104.516	105.583	105.283	103.066	104.598	102.377		Q1/2012	40999	15973881	2.3759e+06	2.4517e+06	3.47122e+06	2.15641e+06	1.4489e+06	4728.9	1.49725e+06
Q2/2012	2012-06-30	104.944	105.861	104.766	106.015	105.986	103.3	105.242	103.167		Q2/2012	41090	16121851	2.39048e+06	2.45574e+06	3.48878e+06	2.15092e+06	1.45698e+06	4726.36	1.49443e+06
Q3/2012	2012-09-30	105.508	106.861	105.672	106.811	106.876	103.963	106.102	104.116		Q3/2012	41182	16227939	2.44181e+06	2.4806e+06	3.52305e+06	2.15921e+06	1.46923e+06	4746.11	1.49705e+06
Q4/2012	2012-12-31	105.936	107.537	107.034	107.76	107.705	104.831	106.962	105.071		Q4/2012	41274	16297349	2.45162e+06	2.51118e+06	3.53835e+06	2.16382e+06	1.48329e+06	4794.99	1.49601e+06
Q1/2013	2013-03-31	106.349	108.248	109.006	108.99	108.583	106.021	107.961	106.094		Q1/2013	41364	16475440	2.48378e+06	2.55662e+06	3.57084e+06	2.15908e+06	1.5156e+06	4897.81	1.5054e+06
Q2/2013	2013-06-30	106.571	108.972	110.25	109.865	109.033	106.79	108.382	106.762		Q2/2013	41455	16541390	2.51411e+06	2.60343e+06	3.63142e+06	2.16822e+06	1.53649e+06	4958.68	1.5136e+06
Q3/2013	2013-09-30	107.084	109.752	111.296	110.892	109.568	107.673	108.721	107.569		Q3/2013	41547	16749349	2.55481e+06	2.62794e+06	3.6839e+06	2.18619e+06	1.56188e+06	5012.23	1.52401e+06
Q4/2013	2013-12-31	107.636	110.366	111.828	111.804	109.896	108.364	108.717	108.197		Q4/2013	41639	16999888	2.58113e+06	2.6515e+06	3.7294e+06	2.1901e+06	1.58775e+06	5010.43	1.53728e+06
Q1/2014	2014-03-31	108.084	110.425	111.642	112.428	109.849	108.808	108.214	108.582		Q1/2014	41729	17031324	2.60416e+06	2.64908e+06	3.7832e+06	2.18994e+06	1.59623e+06	5035.83	1.54885e+06
Q2/2014	2014-06-30	108.692	110.638	111.78	113.136	110.039	109.063	108.226	109.024		Q2/2014	41820	17320921	2.63088e+06	2.65894e+06	3.80062e+06	2.19216e+06	1619166	4944.07	1.56117e+06
Q3/2014	2014-09-30	109.188	110.908	111.924	113.636	110.122	108.956	108.561	109.229		Q3/2014	41912	17622257	2.65579e+06	2.67426e+06	3.8296e+06	2.19907e+06	1.62935e+06	4957.39	1.57475e+06
Q4/2014	2014-12-31	109.345	110.826	111.786	113.668	109.863	108.2	108.936	108.963		Q4/2014	42004	17735933	2.6715e+06	2.67389e+06	3.86476e+06	2.19395e+06	1.62539e+06	5005.57	1.58269e+06
Q1/2015	2015-03-31	109.326	110.505	111.604	113.388	109.467	106.975	109.508	108.428		Q1/2015	42094	17874715	2.67559e+06	2.68077e+06	3.85955e+06	2.19102e+06	1.60378e+06	5107.24	1.59149e+06
Q2/2015	2015-06-30	109.917	111.252	112.125	113.857	110.075	106.632	110.708	108.684		Q2/2015	42185	18093224	2.70899e+06	2.69269e+06	3.89278e+06	2.21235e+06	1.59632e+06	5159.54	1.60878e+06
Q3/2015	2015-09-30	110.287	111.617	112.428	114.169	110.826	106.328	111.69	108.817		Q3/2015	42277	18227689	2.72963e+06	2.71023e+06	3.91603e+06	2.23239e+06	1.60077e+06	5209.8	1625875
Q4/2015	2015-12-31	110.513	111.991	112.594	114.374	111.816	106.064	112.525	108.921		Q4/2015	42369	18287226	2.75913e+06	2.72101e+06	3.93967e+06	2.25879e+06	1.59845e+06	5232.51	1.64236e+06
Q1/2016	2016-03-31	110.583	112.387	112.632	114.478	113.043	105.905	113.187	109.027		Q1/2016	42460	18325187	2.77787e+06	2.73979e+06	3.96819e+06	2.28883e+06	1605897	5307.95	1.65628e+06
Q2/2016	2016-06-30	111.25	113.046	113.353	115.215	114.52	106.422	114.181	109.706		Q2/2016	42551	18538039	2.79853e+06	2.75103e+06	4.01231e+06	2.321e+06	1.6095e+06	5366.23	1.67971e+06
Q3/2016	2016-09-30	111.629	113.015	113.734	115.604	115.238	106.838	114.545	110.076		Q3/2016	42643	18729130	2.81098e+06	2.76575e+06	4.03934e+06	2.34092e+06	1.63279e+06	5393.51	1.69741e+06
Q4/2016	2016-12-31	112.19	113.34	114.321	116.143	115.68	107.568	114.753	110.607		Q4/2016	42735	18905545	2.83995e+06	2.79693e+06	4.07506e+06	2.36125e+06	1.65307e+06	5416.74	1.71723e+06
Q1/2017	2017-03-31	112.746	113.344	114.887	116.662	115.685	108.369	114.639	111.157		Q1/2017	42825	19057705	2.85119e+06	2.83247e+06	4.13008e+06	2.37333e+06	1.68183e+06	5447.84	1.73934e+06
Q2/2017	2017-06-30	113.029	113.03	115.173	116.85	115.526	108.805	114.369	111.395		Q2/2017	42916	19250009	2.84934e+06	2.85821e+06	4.16293e+06	2.37939e+06	1.7075e+06	5463.7	1.75814e+06
Q3/2017	2017-09-30	113.615	112.943	115.759	117.401	115.827	109.452	114.605	111.967		Q3/2017	43008	19500602	2.85714e+06	2.89236e+06	4.21333e+06	2.39377e+06	1.72471e+06	5502.09	1.77947e+06
Q4/2017	2017-12-31	114.275	113.678	116.435	118.093	116.354	110.208	115.107	112.598		Q4/2017	43100	19754102	2.88597e+06	2.92894e+06	4.26391e+06	2.41312e+06	1.74399e+06	5540.31	1.8016e+06
	2018-03-31	114.9	114.638	116.955	118.67	116.937	110.734	115.687	113.17		Q1/2018	43190	19960097	2.91717e+06	2.94668e+06	4.29746e+06	2.43205e+06	1.75817e+06	5559.87	1.82335e+06

## Sheet: DataTransformed
	Real GDP Growth (log-first differences, annualized, units)										GDP Deflator Index (log-first differences, annualized, units)										NOTE: This is the transformed data used to estimate the model.
	United States: Gross Domestic Product (SAAR, Bil.2010.US$, PPP)	United Kingdom: Gross Domestic Product (SAAR, Bil.2010.US$, PPP)	France: Gross Domestic Product (SAAR, Bil.2010.US$, PPP)	Germany: Gross Domestic Product (SAAR, Bil.2010.US$, PPP)	Italy: Gross Domestic Product (SAAR, Bil.2010.US$, PPP)	Canada: Gross Domestic Product (SAAR, Bil.2010.US$, PPP)	Japan: Gross Domestic Product (SAAR, Bil.2010US$, PPP)	Spain: Gross Domestic Product (SAAR, Bil.2010.US$, PPP)			United States: Gross Domestic Product Implicit Deflator	United Kingdom: Gross Domestic Product Implicit Deflator	France: Gross Domestic Product Implicit Deflator	Germany: Gross Domestic Product Implicit Deflator	Italy: Gross Domestic Product Implicit Deflator	Canada: Gross Domestic Product Implicit Deflator	Japan: Gross Domestic Product Implicit Deflator	Spain: Gross Domestic Product Implicit Deflator			I report it in units, but multiplied by 4 in order to get the annualized log-first difference in units.
Q1/1960	#N/A	#N/A	#N/A	#N/A	#N/A	#N/A	#N/A	#N/A		Q1/1960	#N/A	#N/A	#N/A	#N/A	#N/A	#N/A	#N/A	#N/A			The code mechanically transforms the series in percentages when it is reported in levels (option 1), so naturally I do not need to express the growth rates in percentages as an input for the code.
Q2/1960	-0.0152087	-0.028779	0.0150003	0.0705602	0.0582775	-0.0776799	0.00735143	0.0814008		Q2/1960	0.0104206	0.0164514	0.0150473	0.00420207	0.0090034	0.00567785	0.00949779	0.0142738			Hence, I note that the volatility estimated is the instantaneous standard deviation of the annualized log-first difference expressed in percentages.
Q3/1960	0.00994789	0.0602199	0.0298309	0.135931	0.0583182	0.0605909	0.135102	0.110358		Q3/1960	0.0144113	0.0116268	0.0157908	-0.00398964	0.0160626	0.0114086	0.0126195	0.0189771
Q4/1960	-0.0487163	0.0243516	0.04713	0.0406752	0.00306898	0.0132116	0.150854	0.0797211		Q4/1960	0.0122954	0.01637	0.0127526	-0.0089732	0.0109898	0.0122184	0.0103268	0.0147579
Q1/1961	0.0271057	0.0646397	0.0638231	0.0402658	0.140804	-0.0162189	0.119746	0.112729		Q1/1961	0.00885368	0.00758006	0.00921716	-0.0211708	0.00998779	0.00253268	0.00588696	0.00805715
Q2/1961	0.0736719	0.0160723	0.0635064	-0.0216318	0.0837371	0.09935	0.0844083	0.173813		Q2/1961	0.00957353	0.00182941	0.00684065	-0.0105427	0.00966539	0.0075437	0.00876654	0.00834882
Q3/1961	0.066146	-0.0209663	0.063187	0.0812693	0.0921559	0.0954718	0.0759845	0.0808758		Q3/1961	0.0105972	0.0248767	0.0106468	5.3635e-05	0.00910925	0.00951387	0.0114666	0.00717967
Q4/1961	0.0802584	-0.00639516	0.06739	0.0181828	0.0758029	0.0556066	0.17944	0.111305		Q4/1961	0.0129473	0.00441689	0.0126946	0.0109888	0.0120445	0.0118088	0.0150681	0.0125507
Q1/1962	0.071404	0.0188274	0.0713707	0.0585042	0.0587636	0.104536	0.0533796	0.0935219		Q1/1962	0.0207278	0.0182536	0.022548	0.0274533	0.0216568	0.0178939	0.0248143	0.0201291
Q2/1962	0.0428687	0.0370075	0.0641107	0.041478	0.0428354	0.0289651	0.0554997	0.0919813		Q2/1962	0.00658443	0.0113149	0.0060334	0.0113569	0.00792637	0.00638873	0.00961844	0.00802312
Q3/1962	0.0379227	0.0242288	0.0571808	0.094679	0.023943	0.052148	0.0485999	0.0967802		Q3/1962	0.00824352	0.00829195	0.00702169	0.0108801	0.00725734	0.0100169	0.00927678	0.00865417
Q4/1962	0.0154921	-0.0144491	0.049761	-0.00865629	0.059617	0.0805021	0.082721	0.0107162		Q4/1962	0.00778087	0.0116493	0.00672177	0.00822644	0.0068957	0.0095015	0.00702533	0.00914427
Q1/1963	0.0442643	0.0205712	-0.0671932	-0.142427	0.0264654	0.0239209	0.0543036	0.223742		Q1/1963	0.0175392	0.0098847	0.0167766	0.0159823	0.018334	0.019883	0.0146909	0.0164913
Q2/1963	0.0518073	0.167975	0.174746	0.175471	0.10818	0.0582198	0.116016	0.00331419		Q2/1963	0.00658127	0.00998661	0.00897559	0.00551157	0.0062041	0.00881147	0.004217	0.00741371
Q3/1963	0.0773312	0.0202966	0.129822	0.136417	0.0651192	0.0306231	0.115601	0.0853915		Q3/1963	0.0049089	0.00673181	0.00481265	0.00432442	0.003682	0.00652403	0.00378431	0.00509722
Q4/1963	0.028446	0.0878555	0.0124322	0.019312	0.0409264	0.123704	0.135494	0.0737808		Q4/1963	0.0323645	0.032084	0.0299012	0.032161	0.0333765	0.0310293	0.0323428	0.0304315
Q1/1964	0.0855915	0.0239948	0.0746041	0.0546611	0.0588562	0.0979341	0.125614	0.0225556		Q1/1964	0.0128094	0.00753753	0.0144518	0.0132094	0.0139996	0.00875714	0.0136278	0.0121324
Q2/1964	0.047286	0.0684643	0.0381741	0.0485749	-0.0406813	0.0137474	0.0953438	0.0653834		Q2/1964	0.00957099	0.0139958	0.00957925	0.00985417	0.0102571	0.010227	0.0102631	0.00860422
Q3/1964	0.0539661	0.0157448	0.0487519	0.0413493	-0.00676189	0.0418388	0.0613259	0.0299394		Q3/1964	0.0162181	0.0188411	0.0174402	0.0164521	0.0158494	0.0170812	0.0175919	0.018337
Q4/1964	0.0141595	0.0604031	0.0359872	0.0540466	-0.0167744	0.0210525	0.0497039	0.0860345		Q4/1964	0.0181401	0.0174406	0.019505	0.0182509	0.0190729	0.0191763	0.0194755	0.0207178
Q1/1965	0.0974558	-0.0111726	0.00886997	0.0649327	0.0536445	0.123719	0.0323687	0.0842334		Q1/1965	0.0200636	0.0225857	0.0208647	0.0201381	0.0203015	0.0208082	0.0212137	0.0170325
Q2/1965	0.0543138	0.00425245	0.0983058	0.06263	0.0789685	0.0373487	0.0496505	0.0170284		Q2/1965	0.0179992	0.013689	0.0160887	0.0181011	0.0159097	0.0210927	0.0191997	0.018271
Q3/1965	0.0804267	0.033103	0.0573872	0.0265467	0.0529306	0.0536748	0.0896251	0.0405155		Q3/1965	0.0157094	0.0170508	0.0157907	0.0158724	0.016261	0.0172801	0.015848	0.0167856
Q4/1965	0.0932388	0.024694	0.0553045	0.0238667	0.0596469	0.0971765	0.0617031	0.117823		Q4/1965	0.0271415	0.0264677	0.0263657	0.027348	0.027631	0.0277051	0.0275574	0.0269148
Q1/1966	0.0975754	0.00658863	0.0359264	0.0719852	0.0384988	0.0757685	0.105636	-0.0273138		Q1/1966	0.0258349	0.0263686	0.0261308	0.026133	0.0266279	0.0266912	0.0241685	0.0247642
Q2/1966	0.0163457	0.0231678	0.0600479	0.0122805	0.0565697	0.0833633	0.153523	0.201538		Q2/1966	0.0326427	0.0322272	0.0332811	0.0327145	0.0326164	0.0323996	0.0314192	0.0345206
Q3/1966	0.0283931	0.0131714	0.0453589	0.00490405	0.111434	-0.00153479	0.0961025	0.0785709		Q3/1966	0.038662	0.0403099	0.0380135	0.0385619	0.0378639	0.0381465	0.0380485	0.035539
Q4/1966	0.0341478	-0.0167665	0.0217784	-0.0629544	0.0191219	0.0479702	0.0791464	0.0108212		Q4/1966	0.0338194	0.0366555	0.0341166	0.0334825	0.0322523	0.0318597	0.0335724	0.0332157
Q1/1967	0.0365551	0.0540966	0.0679649	-0.0199589	0.0790172	-0.00928826	0.104609	0.0110045		Q1/1967	0.0166645	0.0137159	0.0173284	0.0162328	0.018066	0.0173131	0.0160398	0.0185924
Q2/1967	0.00350711	0.05575	0.0435452	-0.0125228	0.0851224	0.0830532	0.106207	0.0477706		Q2/1967	0.0201191	0.0237684	0.0199319	0.0202779	0.0212195	0.0201928	0.0202248	0.0212769
Q3/1967	0.0343826	0.0175577	0.0380659	0.0954361	0.061172	0.0133021	0.136334	0.0680277		Q3/1967	0.0380709	0.0349303	0.0387493	0.0387415	0.0371313	0.0360716	0.0381511	0.0358431
Q4/1967	0.032069	0.0212452	0.0388003	0.0511093	0.0782674	0.0151067	0.0765962	-0.028868		Q4/1967	0.0437676	0.0445937	0.0411401	0.0451556	0.0430909	0.0436955	0.0438689	0.0492561
Q1/1968	0.0804147	0.142845	0.114724	0.0465404	0.00971329	0.0323294	0.0943198	0.0844598		Q1/1968	0.0441384	0.0441763	0.0427456	0.0461211	0.0458922	0.044641	0.0449463	0.0442691
Q2/1968	0.0669839	-0.0173543	-0.315348	0.030971	0.082921	0.10718	0.134185	0.119556		Q2/1968	0.0419828	0.0446464	0.0475488	0.043271	0.0423444	0.0400041	0.0423817	0.0416278
Q3/1968	0.0287072	0.0788135	0.430868	0.0868579	0.0950394	0.0536503	0.0895625	0.0321226		Q3/1968	0.0392798	0.0371104	0.0355445	0.0397182	0.038509	0.0386165	0.0389765	0.0358441
Q4/1968	0.0177639	0.0159857	0.0407751	0.0599262	0.0925587	0.0547587	0.221637	0.158936		Q4/1968	0.0562344	0.0549867	0.0569544	0.0558731	0.0539916	0.0549733	0.0555265	0.0539844
Q1/1969	0.0617177	-0.00891219	0.00734307	0.0994121	0.0621608	0.0514993	0.0350338	0.139461		Q1/1969	0.0412212	0.040587	0.0450461	0.0399928	0.0409713	0.0416499	0.0407732	0.0429785
Q2/1969	0.0128084	0.0291254	0.0969373	0.0509971	0.0715856	0.0191693	0.114789	-0.0135373		Q2/1969	0.0507455	0.0470847	0.0467743	0.0495851	0.0512088	0.0518275	0.0499563	0.0489985
Q3/1969	0.024958	0.0224996	0.0376377	0.0850204	0.00955496	0.0419715	0.0946963	0.0739307		Q3/1969	0.0559109	0.0605363	0.0546338	0.054705	0.058337	0.0563331	0.0557669	0.0608129
Q4/1969	-0.0174992	0.0204142	0.0314858	0.0610022	-0.0816819	0.0559388	0.153148	0.0445304		Q4/1969	0.0511744	0.063901	0.0507514	0.050038	0.0512608	0.0536239	0.0511179	0.0501844
Q1/1970	-0.00709524	-0.0256327	0.0757335	-0.0643412	0.232942	0.0251816	0.120726	0.0740961		Q1/1970	0.0559415	0.0785157	0.0554026	0.0547982	0.0530928	0.0607178	0.0567942	0.0591352
Q2/1970	0.00707177	0.0932243	0.0501657	0.155953	0.0290934	-0.00164765	0.0482316	0.00634952		Q2/1970	0.0553959	0.0661448	0.0571276	0.0545531	0.0602622	0.0578022	0.0570811	0.0540782
Q3/1970	0.035278	0.0394612	0.0547136	0.0740243	0.0794591	0.0406007	0.105798	0.0203912		Q3/1970	0.0327353	0.0437834	0.0368555	0.0323806	0.0321257	0.0360327	0.035803	0.0324563
Q4/1970	-0.0413568	0.0348047	0.0623194	0.0337614	0.00447034	0.0067409	-0.0128938	0.0314373		Q4/1970	0.05237	0.0581093	0.0563388	0.0522304	0.0482795	0.0530046	0.0563517	0.0510319
Q1/1971	0.105695	-0.0236844	0.00516	-0.0775918	-0.0209765	-0.0240371	0.0362873	0.0311154		Q1/1971	0.0606616	0.0596972	0.0713896	0.0612712	0.0566321	0.0632546	0.0667989	0.0617346
Q2/1971	0.0227626	0.0708125	0.0722235	0.0830769	0.0168442	0.115279	0.0639911	0.0772725		Q2/1971	0.0522642	0.0503723	0.0550762	0.0524929	0.0484191	0.0527699	0.0567189	0.0494242
Q3/1971	0.0311513	0.0689969	0.064698	0.0686097	0.0581661	0.10875	0.0484594	0.0729272		Q3/1971	0.0405121	0.0400433	0.0441554	0.040713	0.0403282	0.0394096	0.0424854	0.0397882
Q4/1971	0.0116657	0.0157945	0.0341252	-0.00336869	0.0225179	0.0451701	0.0362615	0.0797422		Q4/1971	0.0330612	0.0388582	0.033604	0.0330984	0.0381421	0.0339934	0.0334432	0.0335796
Q1/1972	0.0711344	0.00419706	0.0520517	0.00404205	0.0439501	-0.0156132	0.128242	0.0643796		Q1/1972	0.0614381	0.0623961	0.0599933	0.0614455	0.0700828	0.0610953	0.0600081	0.0630761
Q2/1972	0.0915723	0.105658	0.0153376	0.0647924	-0.00181275	0.112152	0.0745866	0.0934141		Q2/1972	0.0244615	0.0306381	0.0273564	0.024527	0.0285241	0.0233388	0.0224147	0.0238437
Q3/1972	0.036695	0.0108589	0.0353617	0.0923498	0.0535665	0.00909405	0.0844819	0.0869241		Q3/1972	0.037302	0.0416473	0.0432561	0.0375325	0.0370996	0.0366362	0.034712	0.036546
Q4/1972	0.0658792	0.0620946	0.0658642	0.0616779	0.0189651	0.0945624	0.0993804	0.0784662		Q4/1972	0.0504673	0.0630209	0.0554552	0.0507954	0.0511768	0.0490069	0.0481377	0.048963
Q1/1973	0.0972804	0.193463	0.0789078	0.0549301	0.0358983	0.104097	0.131605	0.0729568		Q1/1973	0.0462288	0.046407	0.055382	0.046781	0.051411	0.0447196	0.0429255	0.0442855
Q2/1973	0.0450952	0.00569991	0.0429835	0.0294465	0.118106	0.0434192	0.0364146	0.0706832		Q2/1973	0.0604474	0.0503514	0.0723145	0.0606835	0.0619849	0.0605982	0.0578089	0.0611978
Q3/1973	-0.0217951	-0.0384502	0.0342071	0.0130871	0.125289	0.0135276	0.0116477	0.0655265		Q3/1973	0.0756578	0.0903524	0.0904612	0.0757532	0.0737542	0.0746228	0.0738182	0.0779739
Q4/1973	0.0371238	-0.0170319	0.0508087	0.00994238	0.0965305	0.0746445	0.0491333	0.0652814		Q4/1973	0.0788177	0.0916909	0.0960398	0.0787723	0.0699821	0.0793703	0.0769902	0.0814443
Q1/1974	-0.0333643	-0.110532	0.0381886	0.0336854	0.032309	0.0290235	-0.139856	0.0673626		Q1/1974	0.075292	0.0821862	0.0926757	0.0751046	0.0806966	0.0757967	0.0736337	0.0788526
Q2/1974	0.010502	0.0573072	0.0199757	-0.00307872	0.0380213	0.0440204	0.0287027	0.050227		Q2/1974	0.0940075	0.106647	0.102766	0.0939141	0.0947432	0.0941371	0.09406	0.0925223
Q3/1974	-0.0389168	0.0258415	0.0375612	1.70056e-07	0.00666295	-0.00470464	0.0508485	0.0281283		Q3/1974	0.11427	0.116464	0.11314	0.114323	0.114445	0.117239	0.116731	0.108831
Q4/1974	-0.016031	-0.0584966	-0.0608681	-0.0508299	-0.0845013	-0.0187283	-0.0217411	0.00264573		Q4/1974	0.116107	0.116926	0.107387	0.116318	0.110586	0.116907	0.120094	0.115422
Q1/1975	-0.0486202	0.00196645	-0.0180368	-0.0231471	-0.0701966	-0.0271565	0.00523994	-0.0201272		Q1/1975	0.0897035	0.0914148	0.0714514	0.0900518	0.0839236	0.0936305	0.0961395	0.0918006
Q2/1975	0.0307001	-0.0659439	0.0100973	-0.0201287	-0.0020649	0.0519757	0.087832	-0.00332405		Q2/1975	0.0594013	0.0650705	0.0465936	0.0595427	0.0555812	0.063034	0.0637113	0.0627432
Q3/1975	0.0655642	-0.0135187	0.0154642	0.0432774	0.0564567	0.0739922	0.0452529	0.0174358		Q3/1975	0.0706141	0.0718187	0.063766	0.0704763	0.0671301	0.0724007	0.0735161	0.0708343
Q4/1975	0.0535666	0.0449199	0.053652	0.0778399	0.0445641	0.0458829	0.0418567	0.0280151		Q4/1975	0.06612	0.0710075	0.0646325	0.0658017	0.0618454	0.0638057	0.0669415	0.063675
Q1/1976	0.0893217	0.0637427	0.0582825	0.0357796	0.0698597	0.0689313	0.033738	0.0395575		Q1/1976	0.0413547	0.0465887	0.0464886	0.0407906	0.0412043	0.0381396	0.039892	0.0402379
Q2/1976	0.0301096	-0.00708854	0.0474084	0.0589836	0.0716524	0.0855342	0.0235653	0.0459051		Q2/1976	0.0403752	0.043282	0.0467848	0.0400945	0.0531916	0.0403857	0.0392799	0.0397945
Q3/1976	0.0202866	0.0494576	0.018872	0.00119458	0.100388	0.0173815	0.055847	0.0386094		Q3/1976	0.0513503	0.0510825	0.0570851	0.0512909	0.0556192	0.0476275	0.0512972	0.0512468
Q4/1976	0.0299112	0.0835127	0.0495258	0.0733859	0.0687918	0.00844336	0.00474849	0.0305984		Q4/1976	0.0702018	0.072151	0.0734585	0.070374	0.0763093	0.0702887	0.0708663	0.0693465
Q1/1977	0.0462721	0.00198819	0.0439753	0.0340127	0.00158406	0.0548928	0.0865589	0.0315646		Q1/1977	0.0638783	0.064473	0.0669263	0.0643081	0.0700523	0.0659106	0.0645744	0.0629822
Q2/1977	0.0777453	-0.0291221	0.0173542	0.0226139	-0.0223368	0.0226629	0.0280427	0.0181042		Q2/1977	0.0557703	0.0590935	0.060766	0.056218	0.0588043	0.0579806	0.0567115	0.0570577
Q3/1977	0.0701465	0.0276213	0.0182958	-0.00115637	-0.03759	0.0192047	0.0271848	0.0132699		Q3/1977	0.0488747	0.0491399	0.0543389	0.0492944	0.047043	0.0517622	0.0497132	0.0514524
Q4/1977	0.000420264	0.0687475	0.0091197	0.0682401	0.0341281	0.06321	0.0538984	0.0266333		Q4/1977	0.0859553	0.0861738	0.0907531	0.0863645	0.0788897	0.0856183	0.0874818	0.0851752
Q1/1978	0.0138937	0.0343631	0.0551831	0.0164508	0.0648433	0.0340723	0.0748508	0.0248925		Q1/1978	0.0591598	0.067336	0.0642469	0.0595694	0.0538345	0.0611291	0.06049	0.0607524
Q2/1978	0.152574	0.0480796	0.0659579	0.0158239	0.0685988	0.0365389	0.0386921	0.00809585		Q2/1978	0.072555	0.0756929	0.077201	0.0726512	0.0680015	0.0746591	0.0733455	0.072948
Q3/1978	0.0389263	0.0537549	-0.0035199	0.0521127	0.0209935	0.0287209	0.0514078	-0.00491139		Q3/1978	0.066334	0.0652348	0.0714345	0.0661431	0.062865	0.0676335	0.0659996	0.0675272
Q4/1978	0.0532926	0.0363021	0.0339004	0.0464929	0.0604935	0.033854	0.0573095	-0.00592405		Q4/1978	0.0832379	0.0841575	0.0853266	0.0826769	0.081942	0.0836513	0.0827931	0.0824803
Q1/1979	0.00793954	-0.015723	0.0342551	0.00494316	0.0627049	0.0342593	0.0593687	-0.0063809		Q1/1979	0.0708804	0.0754392	0.0726693	0.0700485	0.0759212	0.0714146	0.0692948	0.0701989
Q2/1979	0.00483949	0.173511	0.0380581	0.122321	0.0289786	0.0539121	0.0724296	0.00621313		Q2/1979	0.0955725	0.0928113	0.0946625	0.0951483	0.100899	0.0967724	0.0948616	0.0938733
Q3/1979	0.0286192	-0.0884112	0.0454646	2.94336e-07	0.0686243	0.0257992	0.0303872	0.00960852		Q3/1979	0.0845289	0.0965592	0.0835509	0.0846029	0.0923733	0.0843029	0.0838598	0.0850402
Q4/1979	0.0103419	0.0417732	0.00760105	0.0244449	0.0930647	0.0268086	0.0173604	0.0140361		Q4/1979	0.0790023	0.0808091	0.0773597	0.079509	0.0864947	0.0788284	0.0785783	0.0809711
Q1/1980	0.0129179	-0.0390684	0.044498	0.0319217	-0.00735075	0.0281719	0.0152761	0.0266962		Q1/1980	0.0823503	0.0849658	0.0800031	0.0834046	0.0934617	0.0807197	0.082303	0.0863927
Q2/1980	-0.0819591	-0.079981	-0.0229657	-0.0258354	0.0309221	-0.00131768	-0.0211416	0.0135731		Q2/1980	0.0868408	0.0921113	0.0827538	0.0873798	0.0881667	0.0849197	0.086171	0.0848988
Q3/1980	-0.0060658	-0.00496832	-2.76612e-05	-0.0159004	0.00334567	-0.00542113	0.0886089	-0.0158925		Q3/1980	0.0910247	0.0969171	0.0906643	0.0910074	0.0912157	0.0877878	0.0911623	0.0915424
Q4/1980	0.0734522	-0.0427049	-0.00240765	-0.00531392	0.0339477	0.0554269	0.0841203	0.0231336		Q4/1980	0.109006	0.118554	0.107537	0.108412	0.105877	0.104749	0.109314	0.107087
Q1/1981	0.0819355	-0.00633247	0.0137485	0.0473137	-0.0228851	0.0879313	0.0244473	-0.0227118		Q1/1981	0.0986884	0.107499	0.0979726	0.0975802	0.0978594	0.0928813	0.099177	0.0970952
Q2/1981	-0.029317	0.00969947	0.0196355	-0.00999779	0.00779228	0.0438934	0.0486474	-0.00443118		Q2/1981	0.0743427	0.0803497	0.0730946	0.0736365	0.0754947	0.070604	0.0746504	0.0773716
Q3/1981	0.0456385	0.0432763	0.0319503	0.0105235	0.00185197	-0.0360052	-0.00890407	0.017748		Q3/1981	0.07129	0.0763435	0.0713565	0.0708748	0.0713041	0.0691808	0.0716945	0.0708881
Q4/1981	-0.0469393	0.00459598	0.021674	-0.00315449	0.0323348	-0.0182687	0.0290983	-0.00399563		Q4/1981	0.0742383	0.0817424	0.0755553	0.0741816	0.0750303	0.0717493	0.0746691	0.0740622
Q1/1982	-0.0674771	0.00624205	0.0316341	0.0149588	-0.00158123	-0.0478652	0.0608289	0.0164301		Q1/1982	0.0556101	0.0616109	0.058858	0.0559146	0.0560629	0.059061	0.0562446	0.0551469
Q2/1982	0.0217319	0.044712	0.0277046	-0.0246999	-0.0113831	-0.0463779	0.0273698	0.0151629		Q2/1982	0.0478792	0.0497095	0.0484034	0.0481631	0.0475208	0.0493907	0.0486693	0.0479135
Q3/1982	-0.014432	0.010544	0.00217449	-0.0397328	-0.00214009	-0.0354238	0.01745	0.026838		Q3/1982	0.0571784	0.060617	0.0565062	0.0573869	0.0576528	0.0567202	0.0577642	0.0566237
Q4/1982	0.0039	0.028108	0.0238549	0.00957209	-0.0116477	-0.0370867	0.0552024	0.0140751		Q4/1982	0.0442053	0.0503208	0.0424206	0.0443372	0.0468001	0.0447816	0.0447307	0.0453297
Q1/1983	0.052052	0.0717744	0.0161019	0.0360875	0.0111751	0.0652511	0.00251964	0.0145919		Q1/1983	0.0321667	0.0390543	0.0318487	0.0322621	0.0289303	0.0301845	0.0318859	0.0333491
Q2/1983	0.0902526	0.0339666	0.00044893	0.041891	-0.00481925	0.0787124	0.0299572	0.0246284		Q2/1983	0.0269931	0.0286527	0.027272	0.0270528	0.027108	0.0267371	0.026706	0.0275038
Q3/1983	0.0775603	0.0438008	0.0061214	-0.00834341	0.0738041	0.0450698	0.0594179	0.00587808		Q3/1983	0.0416476	0.0439725	0.0419882	0.0417201	0.040349	0.0432627	0.0416649	0.0405206
Q4/1983	0.0816488	0.034448	0.0187543	0.0549518	0.0877034	0.0505671	0.0331838	0.0257616		Q4/1983	0.0293185	0.0314725	0.0291057	0.0293489	0.032665	0.029127	0.0286877	0.0290249
Q1/1984	0.0786941	0.0274793	0.0267036	0.0525561	-0.00785219	0.0680188	0.0458017	0.0329519		Q1/1984	0.0423732	0.0401886	0.0418786	0.0423223	0.0429413	0.0421328	0.0416259	0.04242
Q2/1984	0.0696438	-0.0350362	0.0116611	-0.0635098	0.0128579	0.0774873	0.0601166	-0.0123505		Q2/1984	0.0335193	0.0376767	0.032864	0.0334477	0.0330986	0.0334687	0.0329376	0.0342414
Q3/1984	0.0391596	0.025943	0.0225229	0.107475	0.0468236	0.0169387	0.0485841	0.0346858		Q3/1984	0.0323057	0.0316857	0.031523	0.0322465	0.0314186	0.0324487	0.0321612	0.0314917
Q4/1984	0.0317787	0.078677	0.00970609	0.0335316	0.000641719	0.0625528	0.0068989	0.00510202		Q4/1984	0.0267318	0.0279511	0.0259091	0.0267014	0.0270072	0.0265383	0.0266328	0.028112
Q1/1985	0.0395688	0.0336042	0.00726415	-0.0218625	0.022804	0.0603026	0.0968496	0.0443922		Q1/1985	0.0457373	0.0290098	0.0457997	0.0456441	0.0449116	0.0444753	0.0465475	0.0451593
Q2/1985	0.0364529	0.0843327	0.026868	0.0398903	0.0524894	0.0128279	0.0801838	-0.00375893		Q2/1985	0.024712	0.0306792	0.0259785	0.0245229	0.0253087	0.0266733	0.0251866	0.0247311
Q3/1985	0.0617495	0.00378696	0.0257109	0.05176	0.031913	0.0503228	0.0520124	0.0412532		Q3/1985	0.0231266	0.0244799	0.0238659	0.022932	0.0229623	0.0225265	0.0234819	0.0229162
Q4/1985	0.0298951	0.00970289	0.0159194	0.0239274	0.0265833	0.0610736	0.0527846	0.045677		Q4/1985	0.0230389	0.0378706	0.0227365	0.0227836	0.0236263	0.0228385	0.0231142	0.0204498
Q1/1986	0.0369035	0.0453135	0.0147222	-0.0229477	0.0248498	-0.000885657	0.0158723	0.0112658		Q1/1986	0.0195014	0.0083643	0.0196122	0.0191798	0.0196191	0.0198369	0.0193763	0.0222165
Q2/1986	0.0183208	0.0291681	0.0429341	0.0457646	0.0257892	0.0229629	-0.0098467	0.0941456		Q2/1986	0.0159852	0.0181406	0.0160422	0.0158076	0.0159116	0.0153244	0.015513	0.0149676
Q3/1986	0.0400612	0.0174278	0.0163377	0.0294211	0.039727	0.00509834	0.023365	-0.0283014		Q3/1986	0.0160774	0.0179905	0.0165552	0.0161087	0.0157398	0.0165411	0.0159579	0.0159376
Q4/1986	0.0206569	0.0699735	0.00961212	0.0396868	0.01639	-0.0289202	0.0314241	0.0254709		Q4/1986	0.0222061	0.0202211	0.0219912	0.0223616	0.0225568	0.0226475	0.0222567	0.0233027
Q1/1987	0.0278718	0.0355281	0.0108247	-0.101674	0.0163515	0.0915802	-0.00286359	0.0810996		Q1/1987	0.028976	0.0261005	0.0276308	0.0292703	0.0287103	0.0280301	0.0291129	0.0256935
Q2/1987	0.0446505	0.0573707	0.0455375	0.0888066	0.0601212	0.0515311	0.0829574	0.0593991		Q2/1987	0.0266891	0.0282874	0.0260174	0.0269136	0.0269921	0.026917	0.0268488	0.027868
Q3/1987	0.0361145	0.0955589	0.0304082	0.0275895	0.011529	0.0608121	0.0792157	0.0817667		Q3/1987	0.0289355	0.0240294	0.0290399	0.0291	0.0285805	0.028523	0.028772	0.0307267
Q4/1987	0.065483	0.0450141	0.060657	0.0634895	0.0428099	0.0516032	0.101697	0.0810037		Q4/1987	0.0330073	0.0306562	0.0327301	0.0331371	0.0335485	0.0331573	0.0330781	0.0341379
Q1/1988	0.0224326	0.0717004	0.0515322	-0.0364444	0.0584394	0.0580844	0.094356	0.0128411		Q1/1988	0.0313153	0.0318985	0.0311176	0.0312909	0.031671	0.0319505	0.0311723	0.0298758
Q2/1988	0.0525052	0.0238658	0.026538	0.0718639	0.0253304	0.0353834	-0.00584245	0.0486304		Q2/1988	0.0384587	0.0328577	0.038552	0.03843	0.0379621	0.0377836	0.0385142	0.0392327
Q3/1988	0.023022	0.0607152	0.0525537	0.0450682	0.0522163	0.000327994	0.0882641	0.0714739		Q3/1988	0.0468588	0.0484977	0.0467604	0.0467605	0.0463556	0.0475043	0.0467208	0.0457863
Q4/1988	0.0526361	0.0343151	0.0391444	0.0468267	0.0474731	0.0280083	0.0419235	-0.00898135		Q4/1988	0.0319264	0.0231009	0.0320611	0.0318065	0.0330659	0.0324806	0.0314584	0.0329385
Q1/1989	0.0401474	0.0173753	0.0537307	0.0415888	0.0247713	0.0453636	0.106492	0.0932303		Q1/1989	0.0436862	0.0476826	0.0433869	0.0434672	0.0468368	0.0420178	0.0431791	0.0433535
Q2/1989	0.031331	0.0260053	0.0319939	0.0160696	0.0172586	0.0153364	-0.0525636	0.0391711		Q2/1989	0.041155	0.034304	0.0411224	0.0410381	0.0395083	0.0422207	0.0404659	0.0408869
Q3/1989	0.029749	0.00373687	0.0468686	0.036364	0.0414816	0.0144109	0.0693726	0.0532314		Q3/1989	0.0288955	0.0367028	0.0290072	0.0289525	0.0256464	0.0294726	0.0283107	0.0290961
Q4/1989	0.00845425	0.00360897	0.0472886	0.0460857	0.0409552	-0.00858026	0.122058	-0.00664571		Q4/1989	0.0277206	0.0215997	0.0273203	0.0279102	0.0229749	0.0275092	0.0271947	0.0275323
Q1/1990	0.0435572	0.0271631	0.0275291	0.0821783	0.015913	0.0373701	-0.0190824	0.0348882		Q1/1990	0.043893	0.044819	0.0429371	0.0442331	0.0413575	0.0432973	0.0436981	0.0435517
Q2/1990	0.0154377	0.0205524	0.018915	0.0196182	0.0121728	-0.016665	0.124211	0.0674141		Q2/1990	0.0410834	0.0458998	0.0404631	0.0412182	0.0302847	0.0412832	0.0410765	0.0401409
Q3/1990	0.000987621	-0.0417354	0.0144968	0.0833627	0.00640864	-0.0288142	0.0665188	-0.0119566		Q3/1990	0.0355593	0.0408255	0.0347395	0.0354972	0.0316442	0.0360877	0.0359045	0.0353076
Q4/1990	-0.0342433	-0.0134229	0.0115232	0.0698042	-0.0260681	-0.0360175	-0.00760791	0.148477		Q4/1990	0.0301466	0.0306287	0.0300386	0.0299147	0.028833	0.0302772	0.0302508	0.0308257
Q1/1991	-0.0188149	-0.0112596	-0.00648378	0.114172	0.0781733	-0.0582965	0.0347009	-0.0776184		Q1/1991	0.0397022	0.0405254	0.039703	0.039253	0.0459026	0.0398039	0.0404404	0.0393097
Q2/1991	0.0309228	-0.00487698	0.0226955	-0.0166491	-0.0219498	0.0182523	0.0471724	0.048476		Q2/1991	0.0272789	0.0297214	0.0278346	0.0271433	0.02388	0.0272526	0.0277536	0.02802
Q3/1991	0.0191546	-0.00915863	0.00753666	-0.0202736	0.00143257	0.00510459	-0.00886632	0.0300974		Q3/1991	0.0292607	0.028892	0.0294677	0.0291624	0.0312298	0.0285615	0.0296859	0.0294599
Q4/1991	0.0174245	0.00636317	0.0215373	0.0514961	0.0466725	0.00720237	0.0280026	0.0198512		Q4/1991	0.0215404	0.0253998	0.0214255	0.0216777	0.0228985	0.0208766	0.0214624	0.0234079
Q1/1992	0.0469728	-0.000320014	0.0356819	0.0635748	0.0107434	0.00262877	0.00124257	0.0397103		Q1/1992	0.0171684	0.0104036	0.0174824	0.0173531	0.0193623	0.0176406	0.0172017	0.0183342
Q2/1992	0.0438651	-0.0048728	0.000379015	-0.0262524	-0.00229046	0.00481293	0.0139758	-0.0525013		Q2/1992	0.0254291	0.0247007	0.0248212	0.0255711	0.0217122	0.0257931	0.0253801	0.0239759
Q3/1992	0.0386965	0.025537	-0.000979166	-0.011945	-0.00889212	0.0214695	0.00471012	0.00255385		Q3/1992	0.0189542	0.00758997	0.0193186	0.019027	0.0202689	0.019455	0.0192116	0.0195238
Q4/1992	0.0398813	0.0279738	-0.00869679	-0.0084821	-0.0276677	0.0225705	-0.0255824	-0.0261491		Q4/1992	0.0269701	0.022292	0.0271131	0.0269635	0.0246947	0.0265502	0.0272041	0.0242982
Q1/1993	0.00745035	0.0291853	-0.0276174	-0.035373	-0.00558252	0.0253805	0.0448226	-0.0374946		Q1/1993	0.0226733	0.0180405	0.0243168	0.0225936	0.024396	0.0226604	0.0227916	0.0229292
Q2/1993	0.0237161	0.0202806	0.00561728	0.00201542	-0.00966182	0.036226	-0.0254072	-0.000271003		Q2/1993	0.0242523	0.0278435	0.0243912	0.0242351	0.0244095	0.0249385	0.0248019	0.0245282
Q3/1993	0.0194588	0.0320616	0.0061498	0.0281089	-0.00631333	0.0380174	-0.0288179	0.0478402		Q3/1993	0.0240127	0.0354906	0.0234555	0.0239963	0.0239574	0.0223666	0.0240612	0.0251026
Q4/1993	0.0530451	0.0271273	0.00903786	-0.00250166	0.0292182	0.0171662	0.0251216	0.0150455		Q4/1993	0.0207872	0.0408416	0.0193783	0.0208555	0.0202653	0.0217185	0.0209802	0.0217398
Q1/1994	0.0390266	0.0483862	0.0262041	0.0486252	0.0303513	0.0584295	0.0329385	0.0329476		Q1/1994	0.0193634	0.0573616	0.0182648	0.0194893	0.0206276	0.0194211	0.019696	0.0183982
Q2/1994	0.0542977	0.046162	0.0453729	0.0138203	0.0288413	0.058192	-0.0209143	0.00876049		Q2/1994	0.0198886	0.00567086	0.0190137	0.0198468	0.0195774	0.018853	0.0197605	0.0204387
Q3/1994	0.023519	0.0451703	0.0227169	0.0299443	0.0248614	0.0507763	0.050498	0.0316344		Q3/1994	0.0215683	-0.0349805	0.0220612	0.021392	0.0203003	0.0225137	0.0217207	0.021185
Q4/1994	0.0451631	0.02271	0.0377032	0.0524725	0.0373827	0.0289186	-0.0183483	0.014941		Q4/1994	0.0219538	-0.0721763	0.0240064	0.0216418	0.0208465	0.0218381	0.0216761	0.0206846
Q1/1995	0.013649	0.01285	0.0190806	-0.0182638	0.0499103	0.0367289	0.0399598	0.0425226		Q1/1995	0.0229031	-0.115008	0.0259226	0.02244	0.0209988	0.0230065	0.0228179	0.0238018
Q2/1995	0.0139516	0.0144039	0.0194154	0.034762	0.00280507	0.00136054	0.0492186	0.0274106		Q2/1995	0.0175343	-0.0642918	0.0165805	0.0177676	0.0190922	0.0176611	0.0173749	0.0168688
Q3/1995	0.0340963	0.0391021	0.00498082	0.0134369	0.0177528	0.00522411	0.044298	0.0189864		Q3/1995	0.0189931	-0.0129525	0.0132438	0.0198379	0.0205017	0.0186273	0.0188179	0.0191192
Q4/1995	0.0282963	0.0112534	0.00185103	-0.00191661	0.0329897	0.0161852	0.00955462	0.0280773		Q4/1995	0.019666	0.0352543	0.0102419	0.0211485	0.0234206	0.019629	0.0196255	0.0213149
Q1/1996	0.0261544	0.0359068	0.0267292	-0.040223	0.0172985	0.00248538	0.0373025	0.0257319		Q1/1996	0.0215898	0.0812774	0.0230122	0.0237275	0.0222677	0.0210913	0.021984	0.0237256
Q2/1996	0.0692373	0.012715	0.00970201	0.056725	-0.0208966	0.027747	0.0451073	0.0253692		Q2/1996	0.0151995	0.0649455	0.0233963	0.0123487	0.0148641	0.0151768	0.0152114	0.0175825
Q3/1996	0.0368305	0.027226	0.0240281	0.0242699	0.00901969	0.0349403	-0.00113952	0.03878		Q3/1996	0.0112611	0.0420122	0.00889056	0.00339909	0.00934126	0.011998	0.0112906	0.0139685
Q4/1996	0.0420412	0.0379057	0.00400229	0.0222367	-0.00239916	0.031686	0.0458112	0.0159811		Q4/1996	0.020241	0.0220596	0.0196855	0.00731786	0.016071	0.0210939	0.0204048	0.0217957
Q1/1997	0.0303717	0.0763725	0.0150077	-0.0241328	0.0107552	0.0524328	0.0138336	0.0452868		Q1/1997	0.0247462	-0.00606315	0.0301495	0.00665606	0.0183425	0.0244704	0.0248963	0.0263509
Q2/1997	0.0598922	0.0351999	0.0461095	0.0560901	0.0539846	0.0447915	-0.0299094	0.0363791		Q2/1997	0.0108328	0.00440627	0.0197665	-0.00271681	0.0153803	0.00997434	0.010401	0.0186249
Q3/1997	0.0506114	0.0195765	0.0288452	0.0154161	0.0240455	0.0475071	0.0129352	0.0402478		Q3/1997	0.014256	0.0183912	0.0247813	0.00528957	0.0282574	0.0143699	0.0147861	0.0275447
Q4/1997	0.0309178	0.041273	0.0426408	0.0283408	0.065213	0.0381548	0.00218713	0.0573583		Q4/1997	0.0132765	-0.016977	0.0232764	0.00888981	0.036311	0.0133559	0.0138744	0.0325287
Q1/1998	0.0393823	0.0302732	0.0354127	0.0319345	-0.0260758	0.0556986	-0.0486487	0.0395498		Q1/1998	0.00651105	-0.00909935	0.0162521	0.0065932	0.0407589	0.00560533	0.00735239	0.0302302
Q2/1998	0.0386074	0.0361064	0.0344303	-0.0128808	0.0154288	0.00173952	-0.0149456	0.0301275		Q2/1998	0.00836399	-0.0130258	0.0128077	0.0118211	0.0292807	0.00898665	0.00814195	0.0228363
Q3/1998	0.0519885	0.0297081	0.0299417	0.0105838	0.00533298	0.036934	0.00623902	0.0476765		Q3/1998	0.0149469	-0.0074867	0.0138469	0.0209441	0.0219173	0.0149429	0.0137329	0.0150833
Q4/1998	0.0651282	0.0387302	0.0294489	-0.000919418	-0.0186249	0.053674	0.0343839	0.0418074		Q4/1998	0.0124521	-0.00211347	0.00598213	0.0215032	0.00853257	0.0153056	0.00971652	0.001422
Q1/1999	0.0318132	0.0225362	0.0234096	0.0319349	0.0235718	0.0718495	-0.0554281	0.0322747		Q1/1999	0.0199447	-0.00579756	0.00825056	0.0318232	0.00028049	0.0239928	0.0165324	-0.00286235
Q2/1999	0.0328533	0.00247993	0.0331092	0.00865446	0.0170776	0.0334524	0.0194316	0.0598585		Q2/1999	0.0134117	4.41605e-05	0.0100039	0.0158222	0.00145225	0.0130373	0.0146729	9.84938e-05
Q3/1999	0.0500265	0.070759	0.0460499	0.0416438	0.0332535	0.0618288	0.0190264	0.0475008		Q3/1999	0.0144402	0.0192282	0.0199478	0.00703491	0.00794966	0.00796595	0.0208423	0.0125534
Q4/1999	0.0688373	0.0546166	0.0501845	0.0496732	0.0562878	0.0564563	-0.000321068	0.0467909		Q4/1999	0.0182695	0.0471511	0.0325862	0.000844381	0.0177887	0.00401242	0.0296348	0.0268434
Q1/2000	0.0115899	0.0336157	0.0417488	0.0374069	0.0462384	0.0633359	0.0771856	0.0632807		Q1/2000	0.0304727	0.0797176	0.054647	0.00295353	0.0339421	0.0111357	0.0475187	0.0494607
Q2/2000	0.0748464	0.0243792	0.0364642	0.0403336	0.0284104	0.0473684	0.00835163	0.0487908		Q2/2000	0.0225751	0.0620924	0.0436472	0.00412144	0.0230754	0.0127648	0.0334413	0.0353058
Q3/2000	0.00480822	0.0112111	0.0267254	-0.00567474	0.0215343	0.0402035	0.00326536	0.0431831		Q3/2000	0.025859	0.0470782	0.0448312	0.0170725	0.0220131	0.0222545	0.0303442	0.0336834
Q4/2000	0.0226715	0.00664944	0.0337988	0.00305693	0.061179	0.00711373	0.0372623	0.0439006		Q4/2000	0.0214351	0.0283555	0.0377431	0.021571	0.0125608	0.0253504	0.0193607	0.0229028
Q1/2001	-0.0113905	0.0524736	0.0200534	0.0648342	0.0145915	0.0207622	0.0235942	0.0397275		Q1/2001	0.0250551	0.00470604	0.0393587	0.0354662	0.0132109	0.036785	0.0160261	0.0207256
Q2/2001	0.0211472	0.0313521	0.0076663	0.00343406	-0.0109111	0.0103111	-0.0192598	0.0316678		Q2/2001	0.0281337	0.0242864	0.0467272	0.0399368	0.0222235	0.0283831	0.0268838	0.0377709
Q3/2001	-0.0126703	0.0296919	0.0128447	-0.0116023	-0.0169926	-0.00302956	-0.0445954	0.0396102		Q3/2001	0.0130846	0.0109019	0.0363819	0.0275139	0.0141564	0.00241444	0.0181343	0.0368388
Q4/2001	0.0110859	0.0177825	7.71973e-05	0.00473088	0.0019699	0.0244474	-0.0106707	0.0282574		Q4/2001	0.0120927	0.0226705	0.0402482	0.0284505	0.0195404	-0.00665186	0.0242378	0.0497464
Q1/2002	0.0366631	0.0189528	0.0118113	-0.012377	-0.00328134	0.059152	0.00472381	0.0226998		Q1/2002	0.0127912	0.0371984	0.0468062	0.0308175	0.0278777	-0.011282	0.0319193	0.0639379
Q2/2002	0.0220084	0.0262938	0.020899	0.0103349	0.0196226	0.0227358	0.0309812	0.029958		Q2/2002	0.0148538	0.0345013	0.0261669	0.0299138	0.024955	0.00832377	0.0271058	0.0478619
Q3/2002	0.0194258	0.0302048	0.0143018	0.0188777	0.0085874	0.0347964	0.0158489	0.024122		Q3/2002	0.0178241	0.0251825	0.00664759	0.0303437	0.0252535	0.0209196	0.0206933	0.0322436
Q4/2002	0.00254547	0.0357112	0.0014833	-0.00856987	0.0154935	0.0220951	0.0105531	0.0299323		Q4/2002	0.0215826	0.0187078	-0.0113585	0.0311287	0.0251517	0.0393281	0.015454	0.0177066
Q1/2003	0.0206663	0.0262075	0.00600387	-0.0487671	-0.0119725	0.0219765	-0.00441177	0.0392775		Q1/2003	0.0245548	-0.00335097	-0.0296653	0.0312383	0.0254011	0.0553963	0.00999494	0.00269437
Q2/2003	0.036946	0.0376871	-0.00865723	0.000868499	-0.0126283	-0.00593922	0.0318639	0.0270737		Q2/2003	0.0128141	-0.00293897	-0.0314671	0.0224432	0.00689839	0.0281529	0.00215853	2.29781e-05
Q3/2003	0.0664364	0.040697	0.0257135	0.0199196	0.00458599	0.0150498	0.0161395	0.0273581		Q3/2003	0.0220996	0.034322	-0.0112618	0.0346464	0.0101538	0.0320483	0.017164	0.018007
Q4/2003	0.0464975	0.0321861	0.0321577	0.01466	0.0318935	0.0273343	0.0441888	0.0408625		Q4/2003	0.0189217	0.0357231	-0.00465473	0.0346752	-0.00362732	0.016551	0.019462	0.0230864
Q1/2004	0.022937	0.0218314	0.0352581	-0.000968799	0.0184414	0.028736	0.0309674	0.0242268		Q1/2004	0.034724	0.068828	0.0215491	0.0535241	0.00574306	0.0225868	0.0404873	0.0473464
Q2/2004	0.0292137	0.0152964	0.0252718	0.0137515	0.0129864	0.0470205	-0.00137835	0.0309162		Q2/2004	0.0346674	0.0527649	0.0261676	0.0392842	0.00747944	0.0323228	0.0366585	0.0406338
Q3/2004	0.0361933	0.00659008	0.0155214	-0.00729989	0.00381474	0.0472737	0.0208435	0.0400914		Q3/2004	0.0245337	0.000381875	0.0226005	0.0146795	-0.00270329	0.0303205	0.0219073	0.0240038
Q4/2004	0.0344257	0.0100715	0.0272241	0.0038665	0.00653562	0.0286137	-0.0106222	0.0245386		Q4/2004	0.0279645	-0.0207633	0.0325012	0.00361202	0.00329853	0.0425322	0.0210321	0.0209281
Q1/2005	0.0424125	0.0377393	0.0105829	-0.00773608	-0.00998014	0.0136176	0.0192048	0.0402599		Q1/2005	0.0368987	-0.0357406	0.0488684	-0.00222876	0.0068037	0.0609381	0.0265502	0.0229647
Q2/2005	0.0208304	0.0441194	0.00788845	0.0265836	0.0386663	0.0283759	0.031172	0.0405644		Q2/2005	0.0289159	0.00152138	0.0414361	0.00219245	0.0190298	0.0471254	0.0217249	0.0384342
Q3/2005	0.0334628	0.046526	0.0195404	0.0323475	0.0265959	0.0489263	0.0379296	0.0377503		Q3/2005	0.0372392	0.0271424	0.0516091	0.0228086	0.0446136	0.0499935	0.0336434	0.0695656
Q4/2005	0.022796	0.0594832	0.0280513	0.015232	0.0112261	0.0394212	0.00846215	0.0416114		Q4/2005	0.0302182	0.0501978	0.0467672	0.0281726	0.0601551	0.0362917	0.0298947	0.0865163
Q1/2006	0.0477692	0.0106384	0.0332863	0.0370933	0.0142512	0.0319329	0.00302103	0.0430843		Q1/2006	0.0313366	0.0702693	0.0501592	0.0420897	0.0718097	0.0276829	0.0347987	0.111977
Q2/2006	0.0119348	0.0089031	0.0390353	0.0635096	0.0234963	0.00192986	0.013894	0.0415568		Q2/2006	0.0320429	0.0565021	0.045367	0.0400773	0.067582	0.0309902	0.0345912	0.0920967
Q3/2006	0.00357592	0.00256487	0.000810357	0.0397483	0.0141733	0.0111006	-0.0068922	0.0392969		Q3/2006	0.0278095	0.0302554	0.0366968	0.0328543	0.0492359	0.0265968	0.0291147	0.0656945
Q4/2006	0.0311867	0.014082	0.0296181	0.0518541	0.0517393	0.0150604	0.0485935	0.0378075		Q4/2006	0.0139606	-0.0149889	0.0183277	0.0161362	0.0255283	0.0127548	0.0136939	0.0297954
Q1/2007	0.00247039	0.0396019	0.0310124	0.016366	0.00643149	0.0257806	0.0293066	0.0407136		Q1/2007	0.0446986	-0.00957468	0.0457137	0.0439237	0.0430048	0.0445579	0.0443461	0.0392028
Q2/2007	0.0304803	0.0287603	0.0317502	0.0295528	-0.00401467	0.0384204	0.00471019	0.0323099		Q2/2007	0.0223094	0.00170989	0.0260167	0.0237538	0.033193	0.0231736	0.0216658	0.0216082
Q3/2007	0.0268134	0.0337346	0.0124337	0.0336783	-0.00146529	0.0165862	-0.0180975	0.0323098		Q3/2007	0.0138497	0.0181595	0.0212344	0.0176447	0.0380864	0.0142491	0.0138738	0.0186798
Q4/2007	0.014251	0.0331448	0.01076	0.0110325	-0.00591875	0.0055986	0.0201728	0.0342755		Q4/2007	0.0173759	0.0321597	0.0284329	0.023456	0.0547489	0.0212356	0.0179326	0.0272607
Q1/2008	-0.0273977	0.0142151	0.0168165	0.0349646	0.0441566	0.00237063	0.0120827	0.0182063		Q1/2008	0.0227959	0.0667135	0.0385794	0.0312153	0.0694363	0.0285962	0.0237851	0.039067
Q2/2008	0.0198058	-0.0297162	-0.0180548	-0.0109363	-0.0395395	0.0138546	-0.0202684	0.00222743		Q2/2008	0.0194135	0.0471256	0.0343754	0.0333087	0.0650028	0.0236762	0.0204731	0.0346413
Q3/2008	-0.0192167	-0.0664234	-0.0139611	-0.0144977	-0.0563239	0.0332283	-0.0514949	-0.0303397		Q3/2008	0.0273119	0.0452256	0.0431654	0.0468203	0.0693848	0.0259953	0.0291779	0.0414468
Q4/2008	-0.0854253	-0.0878175	-0.0557223	-0.078088	-0.0917566	-0.0465321	-0.0917743	-0.0404918		Q4/2008	0.0056663	0.00807609	0.0211273	0.0306808	0.0444293	-0.00322015	0.0054589	0.01833
Q1/2009	-0.0558083	-0.0670611	-0.0664474	-0.183568	-0.111642	-0.0924548	-0.200484	-0.0644866		Q1/2009	0.00989232	-0.019604	0.0273431	0.0401531	0.0456487	0.00210474	0.0109749	0.021733
Q2/2009	-0.00541843	-0.00758964	-0.00545344	0.00293253	-0.0319045	-0.0443818	0.0834963	-0.0389214		Q2/2009	-0.00668785	-0.0217583	0.00722892	0.0143934	0.0128482	-0.00837908	-0.0055772	-0.00840605
Q3/2009	0.0130521	0.00568659	0.00641829	0.0237985	0.0227396	0.0180596	0.00107672	-0.0124639		Q3/2009	-0.000873487	0.0126737	0.0109233	0.0110245	0.002342	-0.00116758	-0.000258501	-0.0121777
Q4/2009	0.038536	0.0138232	0.0271812	0.0364655	0.0157107	0.0469746	0.056628	-0.00251231		Q4/2009	0.0118583	0.0221159	0.0210776	0.0152696	-0.000596919	0.0136277	0.0121497	-0.0103789
Q1/2010	0.0172765	0.017999	0.0165772	0.0292807	0.0168	0.0473724	0.0353649	0.0120566		Q1/2010	0.0140567	0.0442875	0.021566	0.00883402	-0.0138526	0.0152136	0.0132096	-0.0190089
Q2/2010	0.0384559	0.034206	0.0213586	0.0810729	0.021906	0.0205149	0.0492978	0.00727282		Q2/2010	0.0176937	0.0387884	0.0253718	0.0183961	0.0020199	0.0166366	0.0176605	-0.00666349
Q3/2010	0.0269064	0.0230624	0.0244787	0.0323725	0.0210667	0.0284629	0.0720649	0.00193818		Q3/2010	0.0182576	0.0242434	0.0266811	0.0243069	0.0154675	0.0165955	0.0186863	0.00203548
Q4/2010	0.0251255	0.0052072	0.0271111	0.0332972	0.025601	0.0449656	-0.0296914	-5.91664e-05		Q4/2010	0.0204505	0.0225074	0.0303184	0.0327322	0.030365	0.0201371	0.0209644	0.0127465
Q1/2011	-0.0154795	0.0298717	0.0416175	0.0700398	0.0123541	0.0294654	-0.0606372	-0.0144481		Q1/2011	0.0176228	-0.00284568	0.0285502	0.0362329	0.040514	0.0175706	0.0182173	0.0184798
Q2/2011	0.0289929	0.00590251	0.00255307	0.00697616	0.00256011	0.00759086	-0.0211693	-0.0192115		Q2/2011	0.0290043	0.0116515	0.029855	0.0402025	0.047951	0.0232605	0.0305925	0.0318274
Q3/2011	0.00842183	0.0107521	0.00844541	0.0189292	-0.0234502	0.0551342	0.0961321	-0.0162925		Q3/2011	0.0240954	0.00814274	0.014389	0.0271148	0.0383505	0.0120679	0.0251229	0.0291749
Q4/2011	0.04478	0.00663349	0.0102199	0.000770437	-0.036208	0.0314813	-0.00588686	-0.0237954		Q4/2011	0.00575856	0.00879018	-0.014667	0.000391087	0.0148533	-0.00837541	0.00611062	0.011468
Q1/2012	0.0264504	0.0258259	0.00260756	0.012599	-0.0352625	0.00127557	0.0472562	-0.0348661		Q1/2012	0.0210498	0.0281644	-0.00844506	0.00856845	0.0263093	0.000160538	0.0216629	0.0299146
Q2/2012	0.018629	-0.00215399	-0.00297048	0.00383904	-0.0368403	0.013182	-0.0267164	-0.0382405		Q2/2012	0.0182535	0.0266287	0.00955611	0.0163461	0.0266412	0.0090624	0.0245673	0.0307138
Q3/2012	0.00478452	0.0473517	0.00584063	0.00919878	-0.0180605	0.00788074	-0.0158809	-0.0296642		Q3/2012	0.0214508	0.0376161	0.0344482	0.0299055	0.0334538	0.0255981	0.0325608	0.0366545
Q4/2012	0.0008976	-0.00916348	-0.00221284	-0.0180342	-0.0223682	0.00487545	0.00870218	-0.0392731		Q4/2012	0.0161747	0.0252023	0.0512209	0.0353663	0.0308913	0.0332354	0.032283	0.0365033
Q1/2013	0.0278856	0.0257828	-0.00129203	-0.00885525	-0.0412563	0.0410091	0.047692	-0.0137463		Q1/2013	0.0155877	0.0263606	0.0730297	0.0454188	0.0324741	0.0451797	0.0371742	0.0387705
Q2/2013	0.00765642	0.0218743	0.0271728	0.0353035	0.000351467	0.0258476	0.033832	-0.00335383		Q2/2013	0.00832333	0.0266665	0.0453996	0.0319849	0.0165585	0.0289104	0.0155737	0.0250918
Q3/2013	0.0307488	0.0356991	-0.000300239	0.0201972	0.0134272	0.032642	0.0304632	-0.00272903		Q3/2013	0.0192259	0.0285435	0.0377797	0.0371934	0.0195802	0.0329198	0.0125022	0.0301452
Q4/2013	0.0388334	0.0186718	0.0166368	0.0163121	-0.0048031	0.0401152	-0.00126039	0.0113899		Q4/2013	0.020556	0.0223219	0.0190735	0.0327932	0.0119632	0.0255872	-0.000176352	0.0232861
Q1/2014	-0.00921869	0.0333877	0.00301136	0.0350529	0.00140876	0.00497467	0.0387443	0.0157856		Q1/2014	0.0166086	0.00214946	-0.00666962	0.0222361	-0.00171665	0.0163437	-0.0185178	0.0141942
Q2/2014	0.0449955	0.0331537	0.00991468	-0.00676076	-0.00285226	0.0476646	-0.0739985	0.0154286		Q2/2014	0.0224478	0.00768035	0.00494498	0.0251361	0.00691584	0.00939358	0.000440567	0.0162588
Q3/2014	0.0508029	0.0279355	0.0178278	0.0127605	0.00959249	0.0290266	-0.00159217	0.0271199		Q3/2014	0.0181877	0.00975379	0.00514966	0.0176275	0.0029915	-0.00393844	0.0123542	0.00752215
Q4/2014	0.019953	0.0265359	0.00438157	0.0354397	9.52574e-05	0.0181284	0.0248829	0.0298919		Q4/2014	0.00576692	-0.00294163	-0.00492798	0.00111711	-0.00941554	-0.0278696	0.0138047	-0.00976307
Q1/2015	0.0318694	0.0177073	0.0167997	0.00445471	0.00909415	-0.00801586	0.0595136	0.0418646		Q1/2015	-0.000691564	-0.0115988	-0.0065239	-0.00985193	-0.0144378	-0.045513	0.0209178	-0.0196798
Q2/2015	0.0270446	0.0226981	-0.000878169	0.0177676	0.0165887	-0.00579193	-0.00285679	0.0337948		Q2/2015	0.0215568	0.0269346	0.0186285	0.0165209	0.0221529	-0.0128624	0.0436099	0.00943155
Q3/2015	0.0161747	0.0172738	0.01516	0.0129064	0.00888613	0.0225559	0.00345841	0.0373964		Q3/2015	0.0134425	0.0130899	0.0108	0.0109184	0.0271951	-0.0114139	0.0353177	0.00487192
Q4/2015	0.00484528	0.0296165	0.0100015	0.0168994	0.0114314	0.0041548	-0.012398	0.0365341		Q4/2015	0.00819861	0.013378	0.00588706	0.00717249	0.0355855	-0.00996025	0.0297965	0.00381493
Q1/2016	0.00578623	0.0129504	0.0261555	0.025216	0.0092221	0.0245775	0.0337855	0.0298582		Q1/2016	0.00250844	0.0141216	0.00135816	0.0036351	0.0436366	-0.00599285	0.023473	0.00390644
Q2/2016	0.0221316	0.00625153	-0.00916203	0.0185359	0.00386449	-0.0104968	0.00872994	0.0313649		Q2/2016	0.0240617	0.0233871	0.0255387	0.0256938	0.05195	0.0194708	0.0349497	0.0248292
Q3/2016	0.0274226	0.0188261	0.00793045	0.0133944	0.00918897	0.0418319	0.00753602	0.0284406		Q3/2016	0.0135985	-0.00106994	0.0134111	0.0134645	0.0250024	0.0156218	0.012747	0.01347
Q4/2016	0.0174304	0.0295487	0.0242408	0.01659	0.0192874	0.0221401	0.00993389	0.0272091		Q4/2016	0.0200704	0.0114711	0.0205971	0.0186272	0.0152925	0.027234	0.00725722	0.0192315
Q1/2017	0.0122816	0.0156561	0.0307645	0.03583	0.020222	0.0392997	0.0268777	0.0313319		Q1/2017	0.0197833	0.000138883	0.0197406	0.0178072	0.000190827	0.0296868	-0.00397758	0.0198478
Q2/2017	0.0301394	0.00849789	0.026254	0.0252454	0.0157265	0.0445755	0.0210519	0.0344417		Q2/2017	0.0100208	-0.0110898	0.00993548	0.00644577	-0.00552171	0.016034	-0.00942387	0.00855648
Q3/2017	0.0310713	0.0140301	0.0271895	0.0293118	0.0136884	0.0163707	0.0197812	0.027733		Q3/2017	0.0206639	-0.00309964	0.0203219	0.0188321	0.010422	0.0237441	0.00822605	0.0205085
Q4/2017	0.0284706	0.0141957	0.0269778	0.0242055	0.0140495	0.0169474	0.0101948	0.0269726		Q4/2017	0.0231927	0.0259673	0.0232983	0.0235196	0.018144	0.027506	0.0174949	0.0224726

## Sheet: Forecast&Persistence_US
Q1/1960 !Q mag=bil	Quarterly Real GDP Growth (Annualized)	Quarterly GDP Deflator Growth (Annualized)				Standardized Series										Coefficients AR(4) on Real GDP Growth																															Coefficients AR(4) on Inflation Rate (GDP Deflator)
.DESC						Real GDPGrowth	Inflation (GDP Deflator)									Matrix bm in the Gauss code																															Matrix bm in the Gauss code
.T1
.TN																							Forecast
.LSOURCE											Regressors					Time-Varying Coefficients Estimated						Persistence	One-period ahead	Two-periods ahead	Three-periods ahead	Four-periods ahead	Squared Forecasting Error	Squared Forecasting Error	RMSFE	RMSFE												Regressors					Time-Varying Coefficients Estimated
.DTLM											constant	lag1	lag2	lag3	lag4	intercept	lag1	lag2	lag3	lag4			t+1 with information up to t	t+2 with information up to t	t+3 with information up to t	t+4 with information up to t	One-period ahead	Four-period ahead	One-period ahead	Four-period ahead												constant	lag1	lag2	lag3	lag4	intercept	lag1	lag2
Q1/1960	#N/A	#N/A				#N/A	#N/A				1											#N/A							#N/A	#N/A												1
Q2/1960	-1.52087	1.04206				-1.3654	-0.957354				1											#N/A							#N/A	#N/A												1
Q3/1960	0.994789	1.44113				-0.599333	-0.785052				1											#N/A							#N/A	#N/A												1
Q4/1960	-4.87163	1.22954				-2.38578	-0.876411				1											#N/A							#N/A	#N/A												1
Q1/1961	2.71057	0.885368				-0.0768426	-1.02501				1											#N/A							#N/A	#N/A												1
Q2/1961	7.36719	0.957353				1.34119	-0.993929				1	-0.0768426	-2.38578	-0.599333	-1.3654	0.406692	-0.049064	0.0852918	-0.117979	0.173732		0.0919807	0.0404703	#N/A	#N/A	#N/A	18.2447	#N/A	#N/A	#N/A	1											1	-1.02501	-0.876411	-0.785052	-0.957354	0.0654963	0.35616	0.184274
Q3/1961	6.6146	1.05972				1.11202	-0.94973				1	1.34119	-0.0768426	-2.38578	-0.599333	0.384274	-0.058581	0.0909158	-0.129335	0.202857		0.105857	0.485704	0.5755	#N/A	#N/A	4.23007	#N/A	#N/A	#N/A	1											1	-0.993929	-1.02501	-0.876411	-0.785052	0.0426494	0.365005	0.181155
Q4/1961	8.02584	1.29473				1.54177	-0.848261				1	1.11202	1.34119	-0.0768426	-2.38578	0.39755	-0.0288378	0.121453	-0.095744	0.15412		0.150991	0.168035	0.00372295	-0.0235115	#N/A	20.3503	#N/A	#N/A	#N/A	1											1	-0.94973	-0.993929	-1.02501	-0.876411	0.0570927	0.365017	0.173296
Q1/1962	7.1404	2.07278				1.27213	-0.512327				1	1.54177	1.11202	1.34119	-0.0768426	0.375783	-0.0481634	0.133927	-0.0873098	0.196628		0.195082	0.318247	0.387507	0.239163	0.438806	9.81206	7.48854	#N/A	#N/A	1											1	-0.848261	-0.94973	-0.993929	-1.02501	0.0576624	0.377197	0.176558
Q2/1962	4.28687	0.658443				0.403173	-1.12299				1	1.27213	1.54177	1.11202	1.34119	0.349517	-0.0693139	0.153087	-0.0501118	0.220208		0.253869	0.736982	0.733567	0.50702	0.579855	1.20161	0.33663	#N/A	#N/A	2											1	-0.512327	-0.848261	-0.94973	-0.993929	0.0896673	0.385181	0.173301
Q3/1962	3.79227	0.824352				0.252558	-1.05135				1	0.403173	1.27213	1.54177	1.11202	0.321023	-0.087721	0.139596	-0.0916305	0.178909		0.139154	0.520918	0.660795	0.467116	0.585288	0.776611	1.19386	#N/A	#N/A	2											1	-1.12299	-0.512327	-0.848261	-0.94973	0.095588	0.366731	0.159472
Q4/1962	1.54921	0.778087				-0.430499	-1.07133				1	0.252558	0.403173	1.27213	1.54177	0.31487	-0.111799	0.0713809	-0.102554	0.140967		-0.0020045	0.40229	0.490879	0.692298	0.726899	7.47889	14.4455	#N/A	#N/A	2											1	-1.05135	-1.12299	-0.512327	-0.848261	0.100719	0.376418	0.160394
Q1/1963	4.42643	1.75392				0.445673	-0.649999				1	-0.430499	0.252558	0.403173	1.27213	0.346002	-0.0863966	0.0624473	-0.0883556	0.221908		0.109603	0.64564	0.425905	0.541334	0.645893	0.431206	0.432296	#N/A	#N/A	2											1	-1.07133	-1.05135	-1.12299	-0.512327	0.0976991	0.394385	0.150298
Q2/1963	5.18073	0.658127				0.675372	-1.12312				1	0.445673	-0.430499	0.252558	0.403173	0.365501	-0.0702609	0.0667384	-0.108337	0.222977		0.111117	0.367994	0.330489	0.326904	0.366461	1.01886	1.02905	#N/A	#N/A	3											1	-0.649999	-1.07133	-1.05135	-1.12299	0.109604	0.411179	0.169559
Q3/1963	7.73312	0.49089				1.45263	-1.19533				1	0.675372	0.445673	-0.430499	0.252558	0.379193	-0.0727226	0.0664714	-0.0989795	0.222711		0.11748	0.45856	0.472343	0.451848	0.30307	10.6561	14.2504	#N/A	#N/A	3											1	-1.12312	-0.649999	-1.07133	-1.05135	0.107512	0.402727	0.150073
Q4/1963	2.8446	3.23645				-0.0360269	-0.00989739				1	1.45263	0.675372	0.445673	-0.430499	0.423588	-0.0012924	0.100001	-0.0826962	0.202664		0.218676	0.365147	0.250749	0.212599	0.175025	1.73553	0.480334	#N/A	#N/A	3											1	-1.19533	-1.12312	-0.649999	-1.07133	0.105148	0.431914	0.158107
Q1/1964	8.55915	1.28094				1.70417	-0.854214				1	-0.0360269	1.45263	0.675372	0.445673	0.437024	-0.0365403	0.125843	-0.123767	0.183348		0.148883	0.619267	0.602851	0.423847	0.441594	12.6925	17.1902	#N/A	#N/A	3											1	-0.00989739	-1.19533	-1.12312	-0.649999	0.102119	0.410714	0.164745
Q2/1964	4.7286	0.957099				0.537689	-0.994039				1	1.70417	-0.0360269	1.45263	0.675372	0.399582	-0.00933319	0.104781	-0.10655	0.148977		0.137875	0.325739	0.353903	0.476071	0.470062	0.48443	0.049318	#N/A	#N/A	4											1	-0.854214	-0.00989739	-1.19533	-1.12312	0.0941635	0.413646	0.172684
Q3/1964	5.39661	1.62181				0.741112	-0.707042				1	0.537689	1.70417	-0.0360269	1.45263	0.41096	-0.00399362	0.0684282	-0.147314	0.144596		0.0617172	0.740778	0.795352	0.772817	0.747456	1.20433e-06	0.000434036	#N/A	#N/A	4											1	-0.994039	-0.854214	-0.00989739	-1.19533	0.102063	0.437533	0.159447
Q4/1964	1.41595	1.81401				-0.471081	-0.624055				1	0.741112	0.537689	1.70417	-0.0360269	0.382472	0.0596573	0.0837452	-0.165613	0.12321		0.100999	0.185041	0.188538	0.239344	0.370071	4.64233	7.62984	#N/A	#N/A	4											1	-0.707042	-0.994039	-0.854214	-0.00989739	0.0971268	0.43152	0.163301
Q1/1965	9.74558	2.00636				2.06546	-0.541006				1	-0.471081	0.741112	0.537689	1.70417	0.392193	0.010604	0.0723426	-0.174523	0.128237		0.0366608	0.56551	0.576498	0.628105	0.69986	24.2617	20.1102	#N/A	#N/A	4											1	-0.624055	-0.707042	-0.994039	-0.854214	0.086695	0.443962	0.170517
Q2/1965	5.43138	1.79992				0.751701	-0.630138				1	2.06546	-0.471081	0.741112	0.537689	0.35819	0.0355016	0.0597044	-0.190337	0.0967417		0.00161112	0.314348	0.303721	0.375871	0.389974	2.06268	1.411	#N/A	#N/A	5											1	-0.541006	-0.624055	-0.707042	-0.994039	0.0862035	0.439002	0.181037
Q3/1965	8.04267	1.57094				1.54689	-0.729004				1	0.751701	2.06546	-0.471081	0.741112	0.304153	0.0704731	0.0277369	-0.147779	0.0867091		0.03714	0.548294	0.654027	0.613576	0.513841	10.7534	11.5082	#N/A	#N/A	5											1	-0.630138	-0.541006	-0.624055	-0.707042	0.0664644	0.446579	0.16774
Q4/1965	9.32388	2.71415				1.93704	-0.235407				1	1.54689	0.751701	2.06546	-0.471081	0.317379	0.0443077	0.00733434	-0.153728	0.095642		-0.00644415	0.0288568	0.0175635	-0.0385293	0.261567	39.2653	30.2722	#N/A	#N/A	5											1	-0.729004	-0.630138	-0.541006	-0.624055	0.0660266	0.433355	0.173899
Q1/1966	9.75754	2.58349				2.0691	-0.291824				1	1.93704	1.54689	0.751701	2.06546	0.293165	0.0423951	-0.00706911	-0.151647	0.151042		0.0347207	0.562329	0.411991	0.388607	0.535855	24.4829	25.3508	#N/A	#N/A	5											1	-0.235407	-0.729004	-0.630138	-0.541006	0.0694501	0.418121	0.171037
Q2/1966	1.63457	3.26427				-0.404506	0.0021146				1	2.0691	1.93704	1.54689	0.751701	0.268951	0.016119	0.00968752	-0.138767	0.10591		-0.00704999	0.186024	0.182268	0.169939	0.316179	3.76055	5.60091	#N/A	#N/A	6											1	-0.291824	-0.235407	-0.729004	-0.630138	0.080456	0.414956	0.17097
Q3/1966	2.83931	3.8662				-0.0376369	0.262007				1	-0.404506	2.0691	1.93704	1.54689	0.238667	0.0361904	-0.0223274	-0.140952	0.0804054		-0.0466837	0.0291776	0.187028	0.236815	0.471442	0.0481404	2.79471	#N/A	#N/A	6											1	0.0021146	-0.291824	-0.235407	-0.729004	0.0834259	0.405506	0.139575
Q4/1966	3.41478	3.38194				0.137603	0.0529211				1	-0.0376369	-0.404506	2.0691	1.93704	0.214528	0.0417589	-0.0325141	-0.156271	0.0768334		-0.0701929	0.0515974	0.112859	0.191798	0.509216	0.0797662	1.48918	#N/A	#N/A	6											1	0.262007	0.0021146	-0.291824	-0.235407	0.0662992	0.398043	0.133051
Q1/1967	3.65551	1.66645				0.21091	-0.687766				1	0.137603	-0.0376369	-0.404506	2.0691	0.190052	0.0931999	-0.0577121	-0.103701	0.0694426		0.00122952	0.39068	0.440095	0.465483	0.467179	0.348498	0.708206	#N/A	#N/A	6											1	0.0529211	0.262007	0.0021146	-0.291824	0.0826096	0.405969	0.117554
Q2/1967	0.350711	2.01191				-0.795467	-0.53861				1	0.21091	0.137603	-0.0376369	-0.404506	0.152411	0.0924912	-0.0881547	-0.0862833	0.0783302		-0.00361653	0.13135	0.194335	0.20603	0.216356	9.26309	11.0402	#N/A	#N/A	7											1	-0.687766	0.0529211	0.262007	0.0021146	0.0923096	0.410666	0.139025
Q3/1967	3.43826	3.80709				0.144755	0.236484				1	-0.795467	0.21091	0.137603	-0.0376369	0.143977	0.0504601	-0.0539352	-0.0236274	0.126537		0.0994346	0.0844485	0.131146	0.168733	0.197868	0.0392191	0.03042	#N/A	#N/A	7											1	-0.53861	-0.687766	0.0529211	0.262007	0.0850401	0.408379	0.122523
Q4/1967	3.2069	4.37676				0.0743008	0.482445				1	0.144755	-0.795467	0.21091	0.137603	0.109688	0.08117	-0.0783289	-0.0564633	0.143806		0.0901838	0.191625	0.203571	0.145542	0.163604	0.148438	0.086	#N/A	#N/A	7											1	0.236484	-0.53861	-0.687766	0.0529211	0.0839456	0.427842	0.131499
Q1/1968	8.04147	4.41384				1.54653	0.498456				1	0.0743008	0.144755	-0.795467	0.21091	0.109476	0.125697	-0.0411902	-0.0972027	0.137207		0.124511	0.219113	0.189149	0.195177	0.159498	19.0011	20.7461	#N/A	#N/A	7											1	0.482445	0.236484	-0.53861	-0.687766	0.098043	0.440788	0.119882
Q2/1968	6.69839	4.19828				1.13753	0.405385				1	1.54653	0.0743008	0.144755	-0.795467	0.13051	0.161063	-0.0158702	-0.0735177	0.17437		0.246045	0.229072	0.0107434	-0.0125349	0.0401947	8.89971	12.9851	#N/A	#N/A	8											1	0.498456	0.482445	0.236484	-0.53861	0.103321	0.438679	0.113505
Q3/1968	2.87072	3.92798				-0.0280748	0.288679				1	1.13753	1.54653	0.0743008	0.144755	0.0960606	0.171827	0.023923	-0.0477429	0.155845		0.303851	0.347528	0.16264	0.11444	0.103852	1.52133	0.187686	#N/A	#N/A	8											1	0.405385	0.498456	0.482445	0.236484	0.120064	0.418536	0.109552
Q4/1968	1.77639	5.62344				-0.361319	1.02072				1	-0.0280748	1.13753	1.54653	0.0743008	0.116927	0.150157	0.0703265	-0.0294326	0.186309		0.37736	0.161035	0.120732	0.0523286	0.112315	2.94236	2.41909	#N/A	#N/A	8											1	0.288679	0.405385	0.498456	0.482445	0.133434	0.394808	0.119683
Q1/1969	6.17177	4.12212				0.977162	0.372501				1	-0.361319	-0.0280748	1.13753	1.54653	0.147523	0.109697	0.130983	0.0226923	0.155592		0.418965	0.37065	0.393784	0.311828	0.389183	3.96685	3.72813	2.76474	#N/A	8											1	1.02072	0.288679	0.405385	0.498456	0.155371	0.425445	0.114657
Q2/1969	1.28084	5.07455				-0.512223	0.783726				1	0.977162	-0.361319	-0.0280748	1.13753	0.0806187	0.0477576	0.135663	0.0549323	0.102842		0.341195	0.193712	0.317209	0.400139	0.313215	5.37399	7.34745	2.69101	#N/A												1	0.372501	1.02072	0.288679	0.405385	0.138479	0.431435	0.127262
Q3/1969	2.4958	5.59109				-0.142244	1.00675				1	-0.512223	0.977162	-0.361319	-0.0280748	0.0448095	0.0508828	0.123795	0.106307	0.115444		0.396429	0.0980618	0.1997	0.218302	0.194734	0.622724	1.22453	2.66999	#N/A												1	0.783726	0.372501	1.02072	0.288679	0.135099	0.426249	0.13393
Q4/1969	-1.74992	5.11744				-1.43515	0.802246				1	-0.142244	-0.512223	0.977162	-0.361319	0.0298131	0.0179043	0.147801	0.061392	0.0890554		0.316153	-0.0206281	0.0485562	0.132954	0.165212	21.5769	27.6189	2.67715	2.8017												1	1.00675	0.783726	0.372501	1.02072	0.126588	0.426217	0.116818
Q1/1970	-0.709524	5.59415				-1.11833	1.00807				1	-1.43515	-0.142244	-0.512223	0.977162	0.0385771	0.000110933	0.160149	0.0558202	0.11985		0.33593	0.104158	0.0639952	0.117774	0.225195	16.116	19.4652	2.7137	2.86772												1	0.802246	1.00675	0.783726	0.372501	0.101528	0.437295	0.13691
Q2/1970	0.707177	5.53959				-0.686916	0.984514				1	-1.11833	-1.43515	-0.142244	-0.512223	0.0422488	0.03069	0.184443	0.0624718	0.137244		0.414848	-0.335962	-0.260579	-0.0264389	0.00810484	1.32822	5.20911	2.71443	2.89415												1	1.00807	0.802246	1.00675	0.783726	0.0737502	0.43367	0.131833
Q3/1970	3.5278	3.27353				0.172021	0.00611127				1	-0.686916	-1.11833	-1.43515	-0.142244	0.0344234	0.04835	0.170861	0.0732913	0.0966575		0.38916	-0.308801	-0.283508	-0.0419295	0.0248643	2.49308	0.233523	2.72429	2.88896												1	0.984514	1.00807	0.802246	1.00675	0.0817164	0.431279	0.126816
Q4/1970	-4.13568	5.237				-2.16166	0.853867				1	0.172021	-0.686916	-1.11833	-1.43515	0.0691513	0.0415264	0.201825	0.0561803	0.0613552		0.360887	-0.213225	-0.318556	-0.295247	-0.169348	40.9393	42.8039	2.90988	3.03847												1	0.00611127	0.984514	1.00807	0.802246	0.0617006	0.426989	0.13284
Q1/1971	10.5695	6.06616				2.31635	1.21187				1	-2.16166	0.172021	-0.686916	-1.11833	0.0663044	0.0478077	0.173564	0.157581	0.0629325		0.441886	-0.185808	-0.0121916	-0.192181	-0.193575	67.5144	67.9342	3.25019	3.36774												1	0.853867	0.00611127	0.984514	1.00807	0.0704492	0.452053	0.137743
Q2/1971	2.27626	5.22642				-0.209098	0.849298				1	2.31635	-2.16166	0.172021	-0.686916	0.0818592	-0.00495136	0.227481	0.143502	0.0222649		0.388297	-0.411956	-0.333887	-0.00687073	-0.118325	0.44376	0.0888546	3.24742	3.36338												1	1.21187	0.853867	0.00611127	0.984514	0.072726	0.455371	0.133613
Q3/1971	3.11513	4.05121				0.0463538	0.341886				1	-0.209098	2.31635	-2.16166	0.172021	0.0352341	0.0179993	0.233306	0.158688	0.0509169		0.46091	0.237617	0.30445	-0.31172	0.0649808	0.394486	0.00374157	3.19767	3.29653												1	0.849298	1.21187	0.853867	0.00611127	0.0799509	0.436249	0.155318
Q4/1971	1.16657	3.30612				-0.547022	0.0201832				1	0.0463538	-0.209098	2.31635	-2.16166	0.0292353	0.00952568	0.263061	0.131884	0.035804		0.440275	0.202764	0.248239	0.270912	-0.171868	6.06236	1.5177	3.21874	3.30144												1	0.341886	0.849298	1.21187	0.853867	0.0894838	0.428415	0.151206
Q1/1972	7.11344	6.14381				1.26392	1.24539				1	-0.547022	0.0463538	-0.209098	2.31635	0.0283503	0.0212977	0.280491	0.120812	0.0437046		0.466305	0.105675	0.0987185	0.1799	0.142231	14.4667	13.5679	3.22734	3.28426												1	0.0201832	0.341886	0.849298	1.21187	0.0994175	0.441159	0.154232
Q2/1972	9.15723	2.44615				1.8863	-0.351121				1	1.26392	-0.547022	0.0463538	-0.209098	0.051652	0.0435217	0.297571	0.115684	0.017229		0.474005	-0.0543577	-0.126372	0.0821419	0.123448	40.6129	33.5118	3.4161	3.43977												1	1.24539	0.0201832	0.341886	0.849298	0.103869	0.450268	0.161191
Q3/1972	3.6695	3.7302				0.215172	0.203287				1	1.8863	1.26392	-0.547022	0.0463538	0.0332786	0.0746584	0.314693	0.113374	-0.00758995		0.495135	0.509484	0.36291	-0.00876096	0.0843878	0.934079	0.184449	3.42037	3.44061												1	-0.351121	1.24539	0.0201832	0.341886	0.0969533	0.447859	0.1802
Q4/1972	6.58792	5.04673				1.10389	0.771716				1	0.215172	1.8863	1.26392	-0.547022	0.0336682	0.0648013	0.320359	0.0685489	0.00465037		0.458359	0.736	0.812367	0.188062	-0.0184231	1.45948	13.583	3.4058	3.46754												1	0.203287	-0.351121	1.24539	0.0201832	0.106871	0.462813	0.203284
Q1/1973	9.72804	4.62288				2.06012	0.588711				1	1.10389	0.215172	1.8863	1.26392	0.0398383	0.0540188	0.326664	0.030891	-0.0145566		0.397018	0.209629	0.285475	0.458523	0.183316	36.9268	37.9844	3.46342	3.54717												1	0.771716	0.203287	-0.351121	1.24539	0.121468	0.493435	0.160611
Q2/1973	4.50952	6.04474				0.470974	1.20262				1	2.06012	1.10389	0.215172	1.8863	0.0324296	0.0649374	0.34396	0.0156751	-0.0163565		0.408216	0.518422	0.390952	0.311473	0.366602	0.0242771	0.117472	3.45421	3.54146												1	0.588711	0.771716	0.203287	-0.351121	0.141988	0.496885	0.149278
Q3/1973	-2.17951	7.56578				-1.56597	1.85935				1	0.470974	2.06012	1.10389	0.215172	0.0166418	0.0825479	0.337523	-0.0138704	-0.0279408		0.37826	0.729535	0.788478	0.160404	0.196759	56.823	33.5072	3.65667	3.63723												1	1.20262	0.588711	0.771716	0.203287	0.131699	0.51313	0.151985
Q4/1973	3.71238	7.88177				0.228228	1.99578				1	-1.56597	0.470974	2.06012	1.10389	0.0376094	0.0859926	0.322796	-0.0427194	-0.0679515		0.298118	-0.108042	0.17641	0.276185	0.16662	1.21939	0.0409298	3.49032	3.50496												1	1.85935	1.20262	0.588711	0.771716	0.115968	0.511179	0.161324
Q1/1974	-3.33643	7.5292				-1.91828	1.84355				1	0.228228	-1.56597	0.470974	2.06012	0.0346533	0.131166	0.226351	-0.0578829	-0.0409943		0.25864	-0.401584	-0.637278	0.213345	0.296	24.8064	52.8727	3.49176	3.62557												1	1.99578	1.85935	1.20262	0.588711	0.131805	0.508342	0.170437
Q2/1974	1.0502	9.40075				-0.582459	2.65162				1	-1.91828	0.228228	-1.56597	0.470974	0.0528243	0.148986	0.269514	-0.00401288	-0.0355352		0.378952	-0.181914	0.104974	-0.0171734	0.0705172	1.7301	4.59793	3.48267	3.62125												1	1.84355	1.99578	1.85935	1.20262	0.106203	0.524035	0.168283
Q3/1974	-3.89168	11.427				-2.08736	3.52648				1	-0.582459	-1.91828	0.228228	-1.56597	0.053313	0.114605	0.300374	-0.0169142	-0.0239048		0.37416	-0.556066	-0.43655	0.00850901	-0.058553	25.2864	44.3864	3.59411	3.79647												1	2.65162	1.84355	1.99578	1.85935	0.111592	0.524854	0.17115
Q4/1974	-1.6031	11.6107				-1.39044	3.6058				1	-2.08736	-0.582459	-1.91828	0.228228	0.0731017	0.132035	0.289735	-0.000172012	-0.0178259		0.403772	-0.375001	-0.15838	-0.0616564	0.0734191	11.1193	23.1082	3.64179	3.88443												1	3.52648	2.65162	1.84355	1.99578	0.108296	0.515507	0.16187
Q1/1975	-4.86202	8.97035				-2.38285	2.46579				1	-1.39044	-2.08736	-0.582459	-1.91828	0.0611615	0.111057	0.315923	0.00613273	-0.0102406		0.422872	-0.73663	-0.546898	-0.0761579	-0.00512184	29.2242	60.9666	3.76364	4.11969												1	3.6058	3.52648	2.65162	1.84355	0.107396	0.509116	0.154759
Q2/1975	3.07001	5.94013				0.0326154	1.15745				1	-2.38285	-1.39044	-2.08736	-0.582459	0.0433357	0.112843	0.29751	0.000209513	0.0370494		0.447612	-0.66124	-0.466755	-0.097017	0.0203407	5.19164	0.00162475	3.7467	4.07761												1	2.46579	3.6058	3.52648	2.65162	0.118484	0.490684	0.147278
Q3/1975	6.55642	7.06141				1.0943	1.64158				1	0.0326154	-2.38285	-1.39044	-2.08736	0.0533069	0.101891	0.310722	0.025787	0.0638708		0.502271	-0.852951	-0.81783	-0.210545	-0.0608897	40.8894	14.3904	3.91335	4.13227												1	1.15745	2.46579	3.6058	3.52648	0.103161	0.484462	0.147803
Q4/1975	5.35666	6.612				0.728947	1.44754				1	1.0943	0.0326154	-2.38285	-1.39044	0.0372402	0.134985	0.251318	-0.0491021	0.0465051		0.383706	0.245491	-0.173722	-0.29769	-0.0999581	2.52047	7.4093	3.92281	4.15987												1	1.64158	1.15745	2.46579	3.6058	0.107841	0.469845	0.158204
Q1/1976	8.93217	4.13547				1.81776	0.378268				1	0.728947	1.0943	0.0326154	-2.38285	0.0770196	0.133431	0.237247	-0.0847664	0.0371904		0.323102	0.342518	0.232979	-0.380778	-0.321991	23.469	49.3736	3.94057	4.26604												1	1.44754	1.64158	1.15745	2.46579	0.1064	0.458001	0.161586
Q2/1976	3.01096	4.03752				0.0146337	0.335977				1	1.81776	0.728947	1.0943	0.0326154	0.0636862	0.142781	0.250354	-0.144186	0.00822722		0.257176	0.348209	0.204116	0.0781697	-0.059382	1.19993	0.0590765	3.90992	4.21843												1	0.378268	1.44754	1.64158	1.15745	0.0867295	0.459308	0.145331
Q3/1976	2.02866	5.13503				-0.284497	0.809838				1	0.0146337	1.81776	0.728947	1.0943	0.0025426	0.145905	0.253206	-0.159141	-0.003288		0.236682	0.345343	0.472388	0.164423	0.14518	4.27787	1.99091	3.92092	4.2251												1	0.335977	0.378268	1.44754	1.64158	0.0809891	0.481715	0.152498
Q4/1976	2.99112	7.02018				0.00859179	1.62378				1	-0.284497	0.0146337	1.81776	0.728947	0.0346265	0.147193	0.218308	-0.159776	0.0171885		0.222914	-0.28196	-0.235043	-0.0377891	0.14546	0.91036	0.202011	3.91281	4.2169												1	0.809838	0.335977	0.378268	1.44754	0.0793801	0.498674	0.141168
Q1/1977	4.62721	6.38783				0.506814	1.35075				1	0.00859179	-0.284497	0.0146337	1.81776	0.0214283	0.15176	0.219653	-0.105173	-0.019108		0.247132	-0.0760312	-0.0400774	0.047386	0.141303	3.66331	1.44068	3.9116	4.20841												1	1.62378	0.809838	0.335977	0.378268	0.0812324	0.502021	0.140042
Q2/1977	7.77453	5.57703				1.46524	1.00068				1	0.506814	0.00859179	-0.284497	0.0146337	-0.00809322	0.148714	0.203513	-0.115324	-0.039628		0.197276	0.101255	0.0414187	0.0128807	-0.105064	20.0624	26.5909	3.96984	4.27926												1	1.35075	1.62378	0.809838	0.335977	0.0815318	0.486657	0.151795
Q3/1977	7.01465	4.88747				1.23384	0.702955				1	1.46524	0.506814	0.00859179	-0.284497	-0.0532048	0.0846648	0.194216	-0.104743	-0.0657247		0.108413	0.187079	0.120391	0.0155461	0.0679334	11.8158	14.6587	4.01365	4.32804												1	1.00068	1.35075	1.62378	0.809838	0.0808755	0.501629	0.187699
Q4/1977	0.0420264	8.59553				-0.889468	2.30396				1	1.23384	1.46524	0.506814	0.00859179	-0.0546428	0.120848	0.231706	-0.107457	-0.0498348		0.195262	0.379079	0.193556	-0.0283707	0.0407176	17.3532	9.33054	3.99718	4.2615												1	0.702955	1.00068	1.35075	1.62378	0.0711674	0.505545	0.193513
Q1/1978	1.38937	5.91598				-0.479174	1.14703				1	-0.889468	1.23384	1.46524	0.506814	-0.0512189	0.0890422	0.254943	-0.12404	-0.0290593		0.190886	-0.0123352	0.0943494	-0.187268	-0.0195723	2.35017	2.27787	3.943	4.19801												1	2.30396	0.702955	1.00068	1.35075	0.0790421	0.510603	0.186331
Q2/1978	15.2574	7.2555				3.74394	1.72538				1	-0.479174	-0.889468	1.23384	1.46524	-0.0653594	0.109307	0.190652	-0.149214	-0.021642		0.129103	-0.503132	-0.474705	-0.16101	-0.147366	194.512	163.289	4.64588	4.75008												1	1.14703	2.30396	0.702955	1.00068	0.0838369	0.518374	0.190981
Q3/1978	3.89263	6.6334				0.283119	1.45678				1	3.74394	-0.479174	-0.889468	1.23384	-0.0556566	0.13657	0.171164	-0.150694	-0.0405352		0.116505	0.457661	-0.105692	-0.0221574	-0.154462	0.328523	2.06483	4.6386	4.7561												1	1.72538	1.14703	2.30396	0.702955	0.064404	0.524912	0.184939
Q4/1978	5.32926	8.32379				0.720602	2.18663				1	0.283119	3.74394	-0.479174	-0.889468	-0.068438	0.112839	0.158237	-0.176649	-0.0438678		0.0505592	0.679604	0.755936	-0.0820861	-0.146838	0.0181254	8.1142	4.49865	4.64074												1	1.45678	1.72538	1.14703	2.30396	0.0669183	0.514646	0.190716
Q1/1979	0.793954	7.08804				-0.660491	1.65308				1	0.720602	0.283119	3.74394	-0.479174	-0.0272412	0.0992979	0.150447	-0.145021	-0.0181128		0.086611	-0.447364	-0.587295	-0.418849	-0.00903773	0.489827	4.5765	4.25949	4.42228												1	2.18663	1.45678	1.72538	1.14703	0.0422369	0.512323	0.193967
Q2/1979	0.483949	9.55725				-0.754894	2.7192				1	-0.660491	0.720602	0.283119	3.74394	-0.0437663	0.143989	0.159038	-0.122191	-0.00868091		0.172155	-0.0913618	-0.0721225	-0.24142	-0.204198	4.74778	3.27032	4.27525	4.43351												1	1.65308	2.18663	1.45678	1.72538	0.0360355	0.522972	0.190144
Q3/1979	2.86192	8.45289				-0.0307532	2.24237				1	-0.754894	-0.660491	0.720602	0.283119	-0.042311	0.154509	0.161595	-0.139193	0.00828579		0.185197	-0.363638	-0.252474	-0.211338	-0.321083	1.19497	0.908972	4.27818	4.43669												1	2.7192	1.65308	2.18663	1.45678	0.0270658	0.520621	0.162467
Q4/1979	1.03419	7.90023				-0.587334	2.00375				1	-0.0307532	-0.754894	-0.660491	0.720602	-0.0346581	0.108766	0.188642	-0.145269	0.0584539		0.210593	-0.0423372	-0.122577	-0.0201989	-0.007252	3.20299	3.62866	4.26772	4.44412												1	2.24237	2.7192	1.65308	2.18663	0.0261311	0.52621	0.141558
Q1/1980	1.29179	8.23503				-0.50889	2.14831				1	-0.587334	-0.0307532	-0.754894	-0.660491	-0.013186	0.117129	0.217262	-0.172627	0.0790307		0.240794	-0.0105451	0.0259901	-0.020409	-0.0699303	2.6781	2.07786	4.22434	4.40354												1	2.00375	2.24237	2.7192	1.65308	0.0402577	0.528926	0.121886
Q2/1980	-8.19591	8.68408				-3.39809	2.34219				1	-0.50889	-0.587334	-0.0307532	-0.754894	-0.0212924	0.163274	0.216921	-0.199627	0.0944355		0.275003	-0.296936	-0.196377	-0.0794769	-0.020911	103.708	122.991	4.45161	4.71035												1	2.14831	2.00375	2.24237	2.7192	0.0417922	0.512424	0.1022
Q3/1980	-0.60658	9.10247				-1.08698	2.52284				1	-3.39809	-0.50889	-0.587334	-0.0307532	-0.0363742	0.179653	0.227246	-0.223059	0.0426653		0.226504	-0.632794	-0.0658193	0.060481	-0.034047	2.22453	11.9556	4.45613	4.74924												1	2.34219	2.14831	2.00375	2.24237	0.034851	0.53549	0.105456
Q4/1980	7.34522	10.9006				1.3345	3.29922				1	-1.08698	-3.39809	-0.50889	-0.587334	-0.000835031	0.238785	0.200224	-0.18676	0.0650054		0.317254	-0.883908	-0.833804	-0.0503273	-0.0933643	53.0703	21.9858	4.63357	4.7768												1	2.52284	2.34219	2.14831	2.00375	0.0408816	0.535641	0.101338
Q1/1981	8.19355	9.86884				1.59284	2.85373				1	1.3345	-1.08698	-3.39809	-0.50889	-0.0524033	0.257527	0.196694	-0.200193	0.0573468		0.311374	0.728556	0.172009	0.406295	-0.0325679	8.0552	28.4898	4.53516	4.74564												1	3.29922	2.52284	2.34219	2.14831	0.0170622	0.527968	0.0994839
Q2/1981	-2.9317	7.43427				-1.79503	1.80257				1	1.59284	1.3345	-1.08698	-3.39809	-0.0233944	0.217885	0.226567	-0.177537	0.00888304		0.275798	0.78881	0.420445	-0.15463	-0.15669	71.9943	28.9451	4.77669	4.83963												1	2.85373	3.29922	2.52284	2.34219	0.00675648	0.528714	0.0792071
Q3/1981	4.56385	7.129				0.487521	1.67076				1	-1.79503	1.59284	1.3345	-1.08698	0.0456927	0.241142	0.220448	-0.112016	-0.0200885		0.329485	-0.163677	0.26278	-0.130319	0.0911008	4.57291	1.69464	4.6026	4.73581												1	1.80257	2.85373	3.29922	2.52284	0.0110202	0.552086	0.0945418
Q4/1981	-4.69393	7.42383				-2.33166	1.79806				1	0.487521	-1.79503	1.59284	1.3345	0.0386738	0.237247	0.189292	-0.108716	-0.0420539		0.275769	-0.414736	-0.594719	-0.0583535	-0.0725875	39.6259	55.0338	4.73119	4.9139												1	1.67076	1.80257	2.85373	3.29922	-0.0178377	0.539499	0.0950631
Q1/1982	-6.74771	5.56101				-2.95708	0.993761				1	-2.33166	0.487521	-1.79503	1.59284	0.0379028	0.322368	0.230934	-0.0459015	-0.0137251		0.493675	-0.540633	0.160726	0.0352735	-0.102465	62.9683	87.8744	4.85559	5.02396												1	1.79806	1.67076	1.80257	2.85373	-0.0205512	0.536214	0.105176
Q2/1982	2.17319	4.78792				-0.240485	0.65997				1	-2.95708	-2.33166	0.487521	-1.79503	0.0674401	0.330573	0.246457	-0.00774227	0.0115361		0.580824	-1.50923	-0.672582	0.020786	-0.022512	17.3586	0.512354	4.90562	5.01124												1	0.993761	1.79806	1.67076	1.80257	-0.0288775	0.537583	0.0907145
Q3/1982	-1.4432	5.71784				-1.34175	1.06148				1	-0.240485	-2.95708	-2.33166	0.487521	0.0652132	0.366481	0.271872	-0.0210686	0.0167522		0.634037	-0.769574	-1.13659	-0.203431	0.0986154	3.53041	22.3724	4.83583	4.94212												1	0.65997	0.993761	1.79806	1.67076	-0.0258032	0.543709	0.088311
Q4/1982	0.39	4.42053				-0.783503	0.501346				1	-1.34175	-0.240485	-2.95708	-2.33166	0.108925	0.374477	0.308083	0.00602233	0.0451073		0.73369	-0.590603	-0.258961	-0.684247	-0.126181	0.401268	4.65934	4.80107	4.88345												1	1.06148	0.65997	0.993761	1.79806	-0.0145822	0.54553	0.0959918
Q1/1983	5.2052	3.21667				0.682823	-0.0184374				1	-0.783503	-1.34175	-0.240485	-2.95708	0.107456	0.350273	0.269793	-0.0126869	0.0402074		0.647587	-0.644825	-0.660447	-0.283388	-0.461301	19.0078	14.1161	4.76771	4.73117												1	0.501346	1.06148	0.65997	0.993761	-0.0143289	0.549236	0.112231
Q2/1983	9.02526	2.69931				1.84611	-0.241814				1	0.682823	-0.783503	-1.34175	-0.240485	0.128101	0.369737	0.193269	-0.0201406	0.066408		0.609273	0.240193	-0.322439	-0.33928	-0.096862	27.8108	40.7099	4.84127	4.86375												1	-0.0184374	0.501346	1.06148	0.65997	0.0108011	0.557019	0.133659
Q3/1983	7.75603	4.16476				1.4596	0.390912				1	1.84611	0.682823	-0.783503	-1.34175	0.149152	0.39991	0.225991	-0.0569797	0.0352018		0.604123	1.03915	0.275554	-0.223463	-0.28568	1.90631	32.8472	4.71378	4.92269												1	-0.241814	-0.0184374	0.501346	1.06148	0.00670746	0.572054	0.115154
Q4/1983	8.16488	2.93185				1.58411	-0.141413				1	1.4596	1.84611	0.682823	-0.783503	0.110188	0.358686	0.221314	-0.089795	0.0357617		0.525967	0.952964	0.915436	0.210622	-0.0811309	4.29559	29.9033	4.71966	4.99358												1	0.390912	-0.241814	-0.0184374	0.501346	0.0025011	0.571181	0.0860394
Q1/1984	7.86941	4.23732				1.49413	0.422241				1	1.58411	1.4596	1.84611	0.682823	0.0629889	0.354794	0.18924	-0.0915205	0.0475769		0.500091	0.764766	0.633681	0.668929	0.299739	5.73663	15.3837	4.66058	4.88606												1	-0.141413	0.390912	-0.241814	-0.0184374	0.0129748	0.55405	0.0729199
Q2/1984	6.96438	3.35193				1.21853	0.0399605				1	1.49413	1.58411	1.4596	1.84611	0.0527832	0.346305	0.223365	-0.126867	0.0885306		0.531334	0.902304	0.588349	0.48334	0.62932	1.07835	3.74375	4.66017	4.89783												1	0.422241	-0.141413	0.390912	-0.241814	0.000477097	0.554605	0.0568897
Q3/1984	3.91596	3.23057				0.290224	-0.0124348				1	1.21853	1.49413	1.58411	1.4596	0.0322958	0.325445	0.255663	-0.13069	0.0445519		0.49497	0.668855	0.627241	0.340921	0.390424	1.54596	0.108269	4.651	4.89182												1	0.0399605	0.422241	-0.141413	0.390912	-0.00284164	0.562878	0.0652165
Q4/1984	3.17787	2.67318				0.0654596	-0.253099				1	0.290224	1.21853	1.49413	1.58411	0.0267133	0.324846	0.312656	-0.127869	0.0885097		0.598143	0.451128	0.436811	0.422229	0.30066	1.60397	0.596545	4.65333	4.89308												1	-0.0124348	0.0399605	0.422241	-0.141413	0.0170636	0.538355	0.03921
Q1/1985	3.95688	4.57373				0.302684	0.567493				1	0.0654596	0.290224	1.21853	1.49413	0.00588501	0.34314	0.290337	-0.111761	0.100255		0.62197	0.126219	0.240434	0.252772	0.356911	0.335803	0.0317099	4.64215	4.88858												1	-0.253099	-0.0124348	0.0399605	0.422241	0.0173221	0.525244	0.0215508
Q2/1985	3.64529	2.4712				0.207799	-0.340303				1	0.302684	0.0654596	0.290224	1.21853	-0.0267446	0.345147	0.313973	-0.0772429	0.125466		0.707343	0.228745	0.157929	0.316607	0.193111	0.0047312	0.00232648	4.57414	4.80285												1	0.567493	-0.253099	-0.0124348	0.0399605	0.00289482	0.502116	0.0373758
Q3/1985	6.17495	2.31266				0.978132	-0.408756				1	0.207799	0.302684	0.0654596	0.290224	-0.026547	0.340584	0.358139	-0.0918796	0.160831		0.767674	0.193291	0.178598	0.118503	0.172738	6.64248	6.99495	4.55643	4.77785												1	-0.340303	0.567493	-0.253099	-0.0124348	-0.00756709	0.490002	0.0367091
Q4/1985	2.98951	2.30389				0.00810089	-0.412542				1	0.978132	0.207799	0.302684	0.0654596	-0.0499299	0.343277	0.37393	-0.0934556	0.124862		0.748614	0.343429	0.0964232	0.0915504	0.0848569	1.21257	0.0635319	4.50074	4.74745												1	-0.408756	-0.340303	0.567493	-0.253099	0.00403448	0.489693	0.0343329
Q1/1986	3.69035	1.95014				0.221519	-0.56528				1	0.00810089	0.978132	0.207799	0.302684	-0.0395746	0.340873	0.359451	-0.131427	0.125043		0.693941	0.325316	0.452088	0.105107	0.0812363	0.116181	0.212216	4.49298	4.74064												1	-0.412542	-0.408756	-0.340303	0.567493	-0.00402903	0.496231	0.0390983
Q2/1986	1.83208	1.59852				-0.344361	-0.717096				1	0.221519	0.00810089	0.978132	0.207799	-0.000351673	0.34641	0.305988	-0.112459	0.124158		0.664097	-0.00533626	-0.0283399	0.168214	0.0594445	1.23945	1.75837	3.76126	4.17443												1	-0.56528	-0.412542	-0.408756	-0.340303	0.0267923	0.484648	0.0374948
Q3/1986	4.00612	1.60774				0.317679	-0.713116				1	-0.344361	0.221519	0.00810089	0.978132	-0.031903	0.343335	0.288118	-0.150671	0.12065		0.601433	0.0304809	0.186114	0.188944	0.2669	0.88947	0.0278064	3.76359	4.1668												1	-0.717096	-0.56528	-0.412542	-0.408756	0.0182371	0.484964	0.00894729
Q4/1986	2.06569	2.22061				-0.27322	-0.4485				1	0.317679	-0.344361	0.221519	0.00810089	-0.0106145	0.307603	0.26184	-0.158464	0.0888758		0.499856	-0.0374456	-0.153054	0.0385812	-0.0270976	0.599462	0.653237	3.766	4.13873												1	-0.713116	-0.717096	-0.56528	-0.412542	-0.0068297	0.48948	0.0224967
Q1/1987	2.78718	2.8976				-0.0535123	-0.156203				1	-0.27322	0.317679	-0.344361	0.221519	-0.00927276	0.317677	0.229903	-0.150456	0.0742366		0.47136	0.0452231	0.135305	0.0029419	0.0980656	0.105127	0.247764	3.76441	4.12235												1	-0.4485	-0.713116	-0.717096	-0.56528	-0.019032	0.47273	0.0448956
Q2/1987	4.46505	2.66891				0.457434	-0.254941				1	-0.0535123	-0.27322	0.317679	-0.344361	-0.00304227	0.377337	0.279951	-0.161868	0.0302517		0.525672	-0.161562	-0.131082	-0.0597451	-0.12113	4.13183	3.60969	3.76185	4.12364												1	-0.156203	-0.4485	-0.713116	-0.717096	-0.0111916	0.469963	0.0449567
Q3/1987	3.61145	2.89355				0.197495	-0.157951				1	0.457434	-0.0535123	-0.27322	0.317679	0.0203661	0.345205	0.287152	-0.206337	0.0619575		0.487978	0.238966	-0.0251506	0.0241737	0.0406036	0.0185465	0.26544	3.75696	4.1212												1	-0.254941	-0.156203	-0.4485	-0.713116	0.0099019	0.479912	0.076213
Q4/1987	6.5483	3.30073				1.09182	0.0178581				1	0.197495	0.457434	-0.0535123	-0.27322	0.0177049	0.321336	0.280582	-0.24352	0.0865888		0.444987	0.198888	0.228325	-0.0573654	-0.0588165	8.59821	14.2773	3.77933	4.16138												1	-0.157951	-0.254941	-0.156203	-0.4485	0.020226	0.458481	0.055402
Q1/1988	2.24326	3.13153				-0.219147	-0.0551985				1	1.09182	0.197495	0.457434	-0.0535123	-0.0135067	0.282854	0.278134	-0.261705	0.0744617		0.373744	0.226553	0.0210008	0.0701038	-0.00719644	2.14216	0.484434	3.77712	4.15539												1	0.0178581	-0.157951	-0.254941	-0.156203	0.00241831	0.44239	0.0846401
Q2/1988	5.25052	3.84587				0.696626	0.253229				1	-0.219147	1.09182	0.197495	0.457434	-0.0263177	0.243788	0.288955	-0.302313	0.0696677		0.300098	0.207909	0.336624	0.0717724	0.0891643	2.57562	3.97928	3.3326	3.68078												1	-0.0551985	0.0178581	-0.157951	-0.254941	-0.00211984	0.430789	0.10674
Q3/1988	2.3022	4.68588				-0.2012	0.615914				1	0.696626	-0.219147	1.09182	0.197495	-0.0314095	0.265986	0.303208	-0.323643	0.105458		0.351009	-0.245098	-0.35527	-0.12631	0.015328	0.0207801	0.505588	3.32225	3.63185												1	0.253229	-0.0551985	0.0178581	-0.157951	-0.0246755	0.417753	0.111034
Q4/1988	5.26361	3.19264				0.70061	-0.0288146				1	-0.2012	0.696626	-0.219147	1.09182	-0.0324093	0.318396	0.29736	-0.323195	0.101842		0.394403	0.292699	0.300687	0.089464	0.0664017	1.79431	4.33741	3.07164	3.55511												1	0.615914	0.253229	-0.0551985	0.0178581	-0.0161198	0.406644	0.101163
Q1/1989	4.01474	4.36862				0.320305	0.478933				1	0.70061	-0.2012	0.696626	-0.219147	-0.0279498	0.354901	0.278931	-0.320839	0.0551651		0.368158	-0.0710175	-0.246509	-0.274315	-0.185285	1.65134	2.75655	3.03889	3.44015												1	-0.0288146	0.615914	0.253229	-0.0551985	-0.0325174	0.448904	0.108547
Q2/1989	3.1331	4.1155				0.0518282	0.369643				1	0.320305	0.70061	-0.2012	0.696626	-0.0921504	0.398131	0.256344	-0.279188	0.0764464		0.451733	0.324398	0.24525	0.112113	0.139586	0.801164	0.0830504	2.64765	3.30646												1	0.478933	-0.0288146	0.615914	0.253229	-0.0352883	0.448975	0.122393
Q3/1989	2.9749	2.88955				0.00365098	-0.159675				1	0.0518282	0.320305	0.70061	-0.2012	-0.112434	0.38507	0.22715	-0.293418	0.0917775		0.410579	-0.243757	-0.0918723	-0.196601	-0.185104	0.660075	0.384207	2.62446	3.30026												1	0.369643	0.478933	-0.0288146	0.615914	-0.0547688	0.438496	0.113753
Q4/1989	0.845425	2.77206				-0.644817	-0.210403				1	0.00365098	0.0518282	0.320305	0.70061	-0.0757752	0.3843	0.183553	-0.26796	0.0850431		0.384937	-0.0911056	-0.224208	-0.0814364	0.0321183	3.30624	4.94153	2.3985	3.05391												1	-0.159675	0.369643	0.478933	-0.0288146	-0.0619133	0.440812	0.109299
Q1/1990	4.35572	4.3893				0.42414	0.487859				1	-0.644817	0.00365098	0.0518282	0.320305	-0.0774756	0.336475	0.16299	-0.250892	0.0986553		0.347228	-0.275249	-0.0967651	-0.23995	-0.214205	5.27478	4.39418	1.98743	2.59183												1	-0.210403	-0.159675	0.369643	0.478933	-0.0696654	0.422232	0.10528
Q2/1990	1.54377	4.10834				-0.432158	0.366554				1	0.42414	-0.644817	0.00365098	0.0518282	-0.07055	0.279251	0.196024	-0.247333	0.0783428		0.306285	-0.075351	-0.270991	-0.126255	-0.179482	1.37288	0.688487	1.8575	2.5929												1	0.487859	-0.210403	-0.159675	0.369643	-0.0683377	0.403261	0.119384
Q3/1990	0.0987621	3.55593				-0.872191	0.128041				1	-0.432158	0.42414	-0.644817	0.00365098	-0.0391325	0.243871	0.21602	-0.208197	0.0605878		0.312282	0.0815691	0.15132	-0.0513804	-0.117334	9.80947	6.14465	1.90959	2.49319												1	0.366554	0.487859	-0.210403	-0.159675	-0.080729	0.37547	0.128059
Q4/1990	-3.42433	3.01466				-1.94504	-0.105658				1	-0.872191	-0.432158	0.42414	-0.644817	-0.0607088	0.25954	0.209074	-0.202339	0.0575624		0.323837	-0.500367	-0.239967	-0.198485	-0.133489	22.5065	35.3891	2.08263	2.67886												1	0.128041	0.366554	0.487859	-0.210403	-0.0912162	0.39556	0.11658
Q1/1991	-1.88149	3.97022				-1.47522	0.306917				1	-1.94504	-0.872191	-0.432158	0.42414	-0.0603963	0.206844	0.188097	-0.216201	0.0766841		0.255424	-0.500815	-0.26107	0.0356384	-0.0444496	10.2387	22.0753	2.01576	2.72489												1	-0.105658	0.128041	0.366554	0.487859	-0.0848125	0.41186	0.112559
Q2/1991	3.09228	2.72789				0.0393963	-0.229475				1	-1.47522	-1.94504	-0.872191	-0.432158	-0.0785627	0.165447	0.265178	-0.245794	0.126468		0.311299	-0.678691	-0.374415	-0.0814782	-0.125445	5.56059	0.293021	1.83521	2.48234												1	0.306917	-0.105658	0.128041	0.366554	-0.10656	0.403981	0.120789
Q3/1991	1.91546	2.92607				-0.318969	-0.143911				1	0.0393963	-1.47522	-1.94504	-0.872191	-0.0553589	0.165207	0.275564	-0.252739	0.0854333		0.273466	-0.0382945	-0.21427	0.121593	-0.0854	0.849521	0.588299	1.82619	2.27022												1	-0.229475	0.306917	-0.105658	0.128041	-0.104981	0.390421	0.151512
Q4/1991	1.74245	2.15404				-0.371655	-0.477245				1	-0.318969	0.0393963	-1.47522	-1.94504	-0.0266127	0.160609	0.28997	-0.285454	0.094246		0.259371	0.171377	0.155844	-0.177372	-0.146549	3.17993	0.546437	1.81661	2.05828												1	-0.143911	-0.229475	0.306917	-0.105658	-0.124313	0.409098	0.138896
Q1/1992	4.69728	1.71684				0.528152	-0.666012				1	-0.371655	-0.318969	0.0393963	-1.47522	-0.0330504	0.142198	0.26916	-0.237786	0.117711		0.291283	-0.354771	-0.241859	-0.176155	-0.184478	8.40646	5.47641	1.83944	1.98164												1	-0.477245	-0.143911	-0.229475	0.306917	-0.131341	0.420927	0.12129
Q2/1992	4.38651	2.54291				0.433515	-0.309345				1	0.528152	-0.371655	-0.318969	0.0393963	-0.0178308	0.0781574	0.250226	-0.257926	0.120504		0.190962	0.0174682	-0.103049	0.079001	-0.0284717	1.8666	2.30158	1.84612	1.97024												1	-0.666012	-0.477245	-0.143911	-0.229475	-0.116512	0.388994	0.136942
Q3/1992	3.86965	1.89542				0.276123	-0.588907				1	0.433515	0.528152	-0.371655	-0.318969	-0.0155772	0.114548	0.207825	-0.226101	0.0821524		0.178424	0.201671	0.173114	-0.092366	-0.163038	0.0597736	2.07977	1.8335	1.98581												1	-0.309345	-0.666012	-0.477245	-0.143911	-0.135225	0.374457	0.126831
Q4/1992	3.98813	2.69701				0.312201	-0.242809				1	0.276123	0.433515	0.528152	-0.371655	-0.0284434	0.144156	0.16579	-0.214218	0.0885957		0.184324	-0.0628331	-0.0523292	-0.18094	-0.0333099	1.51673	1.28733	1.83275	1.99124												1	-0.588907	-0.309345	-0.666012	-0.477245	-0.142916	0.373553	0.15254
Q1/1993	0.745035	2.26733				-0.675388	-0.428331				1	0.312201	0.276123	0.433515	0.528152	-0.00525636	0.193662	0.167873	-0.188987	0.0988362		0.271384	0.0718303	-0.0377977	-0.0342883	0.0704843	6.02091	5.99924	1.8806	2.03753												1	-0.242809	-0.588907	-0.309345	-0.666012	-0.150946	0.381348	0.154817
Q2/1993	2.37161	2.42523				-0.180062	-0.360155				1	-0.675388	0.312201	0.276123	0.433515	-0.0126051	0.163464	0.17679	-0.14677	0.0917031		0.285187	-0.0685849	0.0517279	-0.0650522	-0.0403639	0.134011	0.210451	1.88167	2.03912												1	-0.428331	-0.242809	-0.588907	-0.309345	-0.14986	0.388321	0.155273
Q3/1993	1.94588	2.40127				-0.309705	-0.370499				1	-0.180062	-0.675388	0.312201	0.276123	-0.0273799	0.151927	0.157298	-0.13367	0.142049		0.317605	-0.163482	-0.163718	-0.0148914	-0.00616431	0.230566	0.993574	1.82765	1.99261												1	-0.360155	-0.428331	-0.242809	-0.588907	-0.175913	0.383057	0.164992
Q4/1993	5.30451	2.07872				0.713065	-0.509764				1	-0.309705	-0.180062	-0.675388	0.312201	-0.0103006	0.16157	0.155356	-0.0830287	0.121588		0.355485	0.00572282	0.0540862	0.0762642	0.0178252	5.39543	5.21238	1.86307	2.03258												1	-0.370499	-0.360155	-0.428331	-0.242809	-0.158366	0.375445	0.173799
Q1/1994	3.90266	1.93634				0.286174	-0.571237				1	0.713065	-0.309705	-0.180062	-0.675388	-0.0218594	0.162749	0.157068	-0.0914363	0.164606		0.392987	-0.049162	-0.124659	-0.116748	-0.0809512	1.21263	1.45344	1.87224	2.0421												1	-0.509764	-0.370499	-0.360155	-0.428331	-0.1589	0.375891	0.175359
Q2/1994	5.42977	1.98886				0.751208	-0.548564				1	0.286174	0.713065	-0.309705	-0.180062	0.00842717	0.185433	0.172889	-0.115664	0.164523		0.407181	0.190972	0.0808176	-0.0257318	-0.0403344	3.38462	6.75641	1.89006	2.07999												1	-0.571237	-0.509764	-0.370499	-0.360155	-0.160688	0.38613	0.175705
Q3/1994	2.3519	2.15683				-0.186064	-0.47604				1	0.751208	0.286174	0.713065	-0.309705	0.0195436	0.207184	0.176917	-0.121521	0.171657		0.434237	0.0859959	-0.0401135	-0.132607	-0.0719561	0.798171	0.14041	1.88931	2.08084												1	-0.548564	-0.571237	-0.509764	-0.370499	-0.171729	0.366505	0.164263
Q4/1994	4.51631	2.19538				0.473044	-0.459395				1	-0.186064	0.751208	0.286174	0.713065	0.0350968	0.192922	0.174344	-0.172229	0.16444		0.359476	0.198138	0.257888	0.118221	0.0911227	0.814955	1.57295	1.89109	2.08773												1	-0.47604	-0.548564	-0.571237	-0.509764	-0.18756	0.367114	0.139423
Q1/1995	1.3649	2.29031				-0.486626	-0.418408				1	0.473044	-0.186064	0.751208	0.286174	0.0262374	0.199108	0.19499	-0.170343	0.144838		0.368592	-0.00237071	-0.0414385	0.0460246	0.0484077	2.52881	3.08695	1.91101	2.10887												1	-0.459395	-0.47604	-0.548564	-0.571237	-0.197112	0.359256	0.110008
Q2/1995	1.39516	1.75343				-0.477411	-0.650213				1	-0.486626	0.473044	-0.186064	0.751208	0.0165983	0.185435	0.179082	-0.116676	0.162892		0.410734	0.15515	0.258502	0.217221	0.193204	4.3149	4.84968	1.9125	2.11804												1	-0.418408	-0.459395	-0.47604	-0.548564	-0.192908	0.378803	0.132307
Q3/1995	3.40963	1.89931				0.136037	-0.587228				1	-0.477411	-0.486626	0.473044	-0.186064	0.0271876	0.212075	0.210536	-0.105371	0.136364		0.453604	-0.251729	-0.127279	-0.0302839	0.00505731	1.62146	0.185002	1.92555	2.11745												1	-0.650213	-0.418408	-0.459395	-0.47604	-0.185056	0.369514	0.138522
Q4/1995	2.82963	1.9666				-0.0405846	-0.558174				1	0.136037	-0.477411	-0.486626	0.473044	0.0414048	0.198845	0.222153	-0.133891	0.15434		0.441448	0.100561	-0.0109278	0.154613	0.139532	0.214834	0.349842	1.85628	2.01205												1	-0.587228	-0.650213	-0.418408	-0.459395	-0.201515	0.371604	0.163192
Q1/1996	2.61544	2.15898				-0.105811	-0.475109				1	-0.0405846	0.136037	-0.477411	-0.486626	0.0269719	0.179584	0.221365	-0.123714	0.211781		0.489017	0.00580176	0.0804368	-0.0441809	-0.074894	0.134338	0.010308	1.8393	2.00836												1	-0.558174	-0.587228	-0.650213	-0.418408	-0.225861	0.380402	0.151404
Q2/1996	6.92373	1.51995				1.20615	-0.751019				1	-0.105811	-0.0405846	0.136037	-0.477411	0.115237	0.190045	0.183188	-0.100319	0.182865		0.455779	-0.0132553	-0.0989064	-0.0121585	-0.0230594	16.0348	16.2937	1.95029	2.10199												1	-0.475109	-0.558174	-0.587228	-0.650213	-0.230578	0.389223	0.163756
Q3/1996	3.68305	1.12611				0.219298	-0.921068				1	1.20615	-0.105811	-0.0405846	0.136037	0.0892375	0.0946651	0.207355	-0.0599925	0.134979		0.377007	0.202274	0.122282	0.0443251	0.0643883	0.00312534	0.258777	1.95015	2.10015												1	-0.751019	-0.475109	-0.558174	-0.587228	-0.223605	0.396396	0.162628
Q4/1996	4.20412	2.0241				0.377974	-0.533346				1	0.219298	1.20615	-0.105811	-0.0405846	0.0694109	0.103778	0.177896	-0.105397	0.0921813		0.268458	0.31415	0.359356	0.139241	0.0037247	0.0439272	1.51039	1.93607	2.07901												1	-0.921068	-0.751019	-0.475109	-0.558174	-0.225042	0.382436	0.166381
Q1/1997	3.03717	2.47462				0.0226145	-0.338828				1	0.377974	0.219298	1.20615	-0.105811	0.0666246	0.120779	0.163466	-0.156269	0.138197		0.266173	-0.054983	0.00414648	0.0785563	0.14608	0.0649325	0.164384	1.92323	2.05944												1	-0.533346	-0.921068	-0.751019	-0.475109	-0.230743	0.361919	0.171468
Q2/1997	5.98922	1.08328				0.921574	-0.939561				1	0.0226145	0.377974	0.219298	1.20615	0.0711673	0.147579	0.0961405	-0.161867	0.14349		0.225342	0.248416	0.254186	0.213798	0.321859	4.88654	3.87845	1.95614	2.08804												1	-0.338828	-0.533346	-0.921068	-0.751019	-0.240308	0.34074	0.18661
Q3/1997	5.06114	1.4256				0.638953	-0.791759				1	0.921574	0.0226145	0.377974	0.219298	0.0799915	0.183256	0.067765	-0.177855	0.115699		0.188865	0.208556	0.0802881	0.0595778	0.0794409	1.99759	3.37588	1.96679	2.1103												1	-0.939561	-0.338828	-0.533346	-0.921068	-0.252788	0.36385	0.182137
Q4/1997	3.09178	1.32765				0.0392445	-0.834049				1	0.638953	0.921574	0.0226145	0.377974	0.114811	0.197318	0.0718357	-0.214189	0.101644		0.156609	0.340665	0.22037	0.157474	0.176198	0.979742	0.202261	1.94822	2.07492												1	-0.791759	-0.939561	-0.338828	-0.533346	-0.240499	0.360663	0.181371
Q1/1998	3.93823	0.651105				0.297005	-1.12616				1	0.0392445	0.638953	0.921574	0.0226145	0.0962034	0.150553	0.0812288	-0.187534	0.155293		0.199541	-0.0153013	0.0328373	-0.0267816	0.0651607	1.05179	0.579642	1.91405	2.04599												1	-0.834049	-0.791759	-0.939561	-0.338828	-0.250207	0.357051	0.174304
Q2/1998	3.86074	0.836399				0.273407	-1.04615				1	0.297005	0.0392445	0.638953	0.921574	0.130243	0.16378	0.0802824	-0.114725	0.146887		0.276224	0.2441	0.120376	0.102578	0.15955	0.0092616	0.139793	1.90289	2.0418												1	-1.12616	-0.834049	-0.791759	-0.939561	-0.248661	0.350291	0.169826
Q3/1998	5.19885	1.49469				0.68089	-0.761928				1	0.273407	0.297005	0.0392445	0.638953	0.0772038	0.118216	0.0951099	-0.104373	0.119122		0.228075	0.20979	0.283417	0.204949	0.129389	2.39328	3.27989	1.84099	2.01975												1	-1.04615	-1.12616	-0.834049	-0.791759	-0.220591	0.337506	0.167048
Q4/1998	6.51282	1.24521				1.08102	-0.869642				1	0.68089	0.273407	0.297005	0.0392445	0.045299	0.150103	0.0792535	-0.145775	0.144908		0.228488	0.131562	0.101684	0.167949	0.145801	9.72119	9.43179	1.72907	1.80783												1	-0.761928	-1.04615	-1.12616	-0.834049	-0.224694	0.331849	0.154415
Q1/1999	3.18132	1.99447				0.06651	-0.54614				1	1.08102	0.68089	0.273407	0.297005	0.0117769	0.183163	0.0551731	-0.0934609	0.149093		0.293968	0.266075	0.122192	0.116021	0.196125	0.429472	0.181166	1.63803	1.6075												1	-0.869642	-0.761928	-1.04615	-1.12616	-0.208991	0.342138	0.162851
Q2/1999	3.28533	1.34117				0.0981851	-0.828211				1	0.06651	1.08102	0.68089	0.273407	0.00491043	0.209678	0.0801391	-0.0515974	0.129845		0.368065	0.105856	0.0972817	0.0144288	0.111263	0.000634616	0.00184425	1.58411	1.60466												1	-0.54614	-0.869642	-0.761928	-1.04615	-0.213309	0.342277	0.16139
Q3/1999	5.00265	1.44402				0.621141	-0.783803				1	0.0981851	0.06651	1.08102	0.68089	-0.0346074	0.193982	0.0850107	-0.03278	0.0830346		0.329247	0.0111943	0.0650687	0.0447585	0.136637	4.01191	2.53141	1.615	1.62348												1	-0.828211	-0.54614	-0.869642	-0.761928	-0.228121	0.358837	0.173907
Q4/1999	6.88373	1.82695				1.19397	-0.61847				1	0.621141	0.0981851	0.06651	1.08102	-0.0218376	0.160125	0.0617577	-0.00351885	0.051572		0.269935	0.139202	0.0634927	0.163971	0.161648	11.9972	11.492	1.69817	1.72561												1	-0.783803	-0.828211	-0.54614	-0.869642	-0.227459	0.39117	0.168606
Q1/2000	1.15899	3.04727				-0.549331	-0.0915799				1	1.19397	0.621141	0.0981851	0.06651	-0.0542551	0.154823	0.079863	-0.0352926	0.106988		0.306381	0.183856	0.041897	-0.0190352	0.0476801	5.79691	3.84355	1.67398	1.71076												1	-0.61847	-0.783803	-0.828211	-0.54614	-0.231907	0.376568	0.178661
Q2/2000	7.48464	2.25751				1.37696	-0.43257				1	-0.549331	1.19397	0.621141	0.0981851	-0.0683901	0.181885	0.0566017	-0.0520138	0.087859		0.274332	-0.124406	0.0581469	-0.00365411	-0.0251166	24.3075	21.1988	1.87176	1.87543												1	-0.0915799	-0.61847	-0.783803	-0.828211	-0.214653	0.365798	0.209708
Q3/2000	0.480822	2.5859				-0.755846	-0.29078				1	1.37696	-0.549331	1.19397	0.621141	-0.0890362	0.205682	0.0913757	-0.0733337	0.0984883		0.322212	0.117601	-0.129641	-0.00625308	0.0117084	8.22699	6.3531	1.93874	1.9107												1	-0.43257	-0.0915799	-0.61847	-0.783803	-0.183865	0.35254	0.208174
Q4/2000	2.26715	2.14351				-0.211872	-0.481789				1	-0.755846	1.37696	-0.549331	1.19397	-0.117087	0.209257	0.128311	-0.0517012	0.117351		0.403217	0.0699407	0.21885	0.0344624	0.0706721	0.856423	0.860874	1.93341	1.90721												1	-0.29078	-0.43257	-0.0915799	-0.61847	-0.201981	0.338211	0.195341
Q1/2001	-1.13905	2.50551				-1.24913	-0.325493				1	-0.211872	-0.755846	1.37696	-0.549331	-0.0692897	0.202697	0.165344	-0.0519274	0.122389		0.438502	-0.375944	-0.335089	-0.188357	-0.111253	8.22206	13.9623	1.95112	1.97137												1	-0.481789	-0.29078	-0.43257	-0.0915799	-0.191558	0.335578	0.193658
Q2/2001	2.11472	2.81337				-0.258292	-0.19257				1	-1.24913	-0.211872	-0.755846	1.37696	-0.0464763	0.201737	0.193919	-0.087027	0.126088		0.434718	-0.100161	0.0272496	0.0224335	0.0192099	0.269651	0.830421	1.95221	1.97628												1	-0.325493	-0.481789	-0.29078	-0.43257	-0.183396	0.313158	0.198074
Q3/2001	-1.26703	1.30846				-1.2881	-0.842335				1	-0.258292	-1.24913	-0.211872	-0.755846	-0.0174732	0.196011	0.190305	-0.12243	0.142507		0.406393	-0.387591	-0.385778	-0.207432	-0.247703	8.74471	11.6726	2.0192	2.05898												1	-0.19257	-0.325493	-0.481789	-0.29078	-0.2029	0.323842	0.178132
Q4/2001	1.10859	1.20927				-0.564679	-0.885161				1	-1.2881	-0.258292	-1.24913	-0.211872	-0.0699926	0.217435	0.18394	-0.128464	0.179204		0.452114	-0.27508	-0.0198612	-0.0617317	-0.113239	0.904397	2.19769	1.98415	2.03597												1	-0.842335	-0.19257	-0.325493	-0.481789	-0.192088	0.336695	0.168058
Q1/2002	3.66631	1.27912				0.214201	-0.855				1	-0.564679	-1.2881	-0.258292	-1.24913	-0.0481183	0.222272	0.239201	-0.158558	0.146088		0.449003	-0.623275	-0.557406	-0.241513	-0.282524	7.5633	2.66072	2.03354	2.04522												1	-0.885161	-0.842335	-0.19257	-0.325493	-0.172917	0.322878	0.154998
Q2/2002	2.20084	1.48538				-0.232064	-0.765946				1	0.214201	-0.564679	-1.2881	-0.258292	-0.0878374	0.226927	0.267587	-0.14528	0.175417		0.52465	-0.0485031	-0.155221	-0.122602	-0.0579476	0.363353	0.326925	2.01019	1.99549												1	-0.855	-0.885161	-0.842335	-0.19257	-0.172269	0.336946	0.158734
Q3/2002	1.94258	1.78241				-0.310712	-0.637701				1	-0.232064	0.214201	-0.564679	-1.2881	-0.0681003	0.230642	0.279383	-0.172086	0.154698		0.492637	-0.163873	-0.185445	-0.33035	-0.394675	0.232517	0.0760214	2.00579	1.99499												1	-0.765946	-0.855	-0.885161	-0.842335	-0.174272	0.334247	0.123236
Q4/2002	0.254547	2.15826				-0.824751	-0.47542				1	-0.310712	-0.232064	0.214201	-0.564679	-0.0730522	0.241721	0.262007	-0.191021	0.165787		0.478494	-0.343494	-0.294947	-0.273072	-0.142342	2.4976	5.02177	2.01886	2.02182												1	-0.637701	-0.765946	-0.855	-0.885161	-0.171244	0.335735	0.130783
Q1/2003	2.06663	2.45548				-0.272936	-0.347093				1	-0.824751	-0.310712	-0.232064	0.214201	-0.0842186	0.289678	0.286581	-0.192854	0.128211		0.511616	-0.339958	-0.15765	-0.108839	-0.154806	0.0484397	0.150483	1.99957	1.999												1	-0.47542	-0.637701	-0.765946	-0.855	-0.185089	0.344684	0.133485
Q2/2003	3.6946	1.28141				0.222816	-0.854015				1	-0.272936	-0.824751	-0.310712	-0.232064	-0.04486	0.239749	0.252918	-0.172892	0.118925		0.438701	-0.292769	-0.388886	-0.180278	-0.183306	2.8666	1.7786	1.98822	1.97484												1	-0.347093	-0.47542	-0.637701	-0.765946	-0.169937	0.352657	0.134421
Q3/2003	6.64364	2.20996				1.12086	-0.4531				1	0.222816	-0.272936	-0.824751	-0.310712	-0.0396772	0.225693	0.227422	-0.190868	0.146713		0.408959	0.0603725	-0.0784405	-0.175076	-0.143832	12.1277	17.2479	2.06914	2.10552												1	-0.854015	-0.347093	-0.47542	-0.637701	-0.168934	0.347371	0.125399
Q4/2003	4.64975	1.89217				0.513677	-0.59031				1	1.12086	0.222816	-0.272936	-0.824751	-0.0917764	0.228286	0.255376	-0.192894	0.136072		0.426841	0.161424	-0.0442849	-0.188608	-0.286562	1.33807	6.90568	2.0776	2.15362												1	-0.4531	-0.854015	-0.347093	-0.47542	-0.172205	0.341826	0.120249
Q1/2004	2.2937	3.4724				-0.203789	0.0919755				1	0.513677	1.12086	0.222816	-0.272936	-0.110858	0.276388	0.210761	-0.213636	0.122135		0.395649	0.186413	0.151196	-0.118514	-0.0917592	1.6419	0.135342	2.08891	2.15453												1	-0.59031	-0.4531	-0.854015	-0.347093	-0.180431	0.329706	0.12344
Q2/2004	2.92137	3.46674				-0.0126504	0.0895334				1	-0.203789	0.513677	1.12086	0.222816	-0.0838022	0.21377	0.197088	-0.20771	0.152393		0.355541	-0.224984	-0.163314	-0.201924	-0.0553296	0.48619	0.0196426	1.96918	2.03309												1	0.0919755	-0.59031	-0.4531	-0.854015	-0.192781	0.327015	0.0890166
Q3/2004	3.61933	2.45337				0.199893	-0.348002				1	-0.0126504	-0.203789	0.513677	1.12086	-0.0697628	0.228984	0.221555	-0.225583	0.128769		0.353726	-0.0893547	-0.107947	-0.0895511	0.022119	0.902212	0.340805	1.9763	2.03372												1	0.0895334	0.0919755	-0.59031	-0.4531	-0.190376	0.304602	0.092002
Q4/2004	3.44257	2.79645				0.146068	-0.199873				1	0.199893	-0.0126504	-0.203789	0.513677	-0.0782074	0.232428	0.212395	-0.186672	0.130479		0.388631	0.0706321	0.0190907	-0.0306099	-0.147116	0.0613649	0.926928	1.97643	2.02923												1	-0.348002	0.0895334	0.0919755	-0.59031	-0.182911	0.320697	0.103149
Q1/2005	4.24125	3.68987				0.389282	0.185874				1	0.146068	0.199893	-0.0126504	-0.203789	-0.11445	0.1674	0.204654	-0.187066	0.156743		0.341732	-0.0786655	-0.0435626	-0.108576	-0.0959451	2.36136	2.53897	1.99451	2.04743												1	-0.199873	-0.348002	0.0895334	0.0919755	-0.182233	0.337829	0.116996
Q2/2005	2.08304	2.89159				-0.267938	-0.158795				1	0.389282	0.146068	0.199893	-0.0126504	-0.123967	0.161972	0.235001	-0.149395	0.0979511		0.345529	-0.0576907	-0.137102	-0.112296	-0.0718675	0.476682	0.414565	1.95966	2.02082												1	0.185874	-0.199873	-0.348002	0.0895334	-0.199025	0.338379	0.119632
Q3/2005	3.34628	3.72392				0.116744	0.200574				1	-0.267938	0.389282	0.146068	0.199893	-0.135805	0.154384	0.193094	-0.142413	0.0911156		0.296181	-0.10459	-0.0440718	-0.149493	-0.100664	0.528279	0.509702	1.9479	1.99854												1	-0.158795	0.185874	-0.199873	-0.348002	-0.171857	0.336901	0.146291
Q4/2005	2.2796	3.02182				-0.208081	-0.102568				1	0.116744	-0.267938	0.389282	0.146068	-0.195067	0.157023	0.179679	-0.151178	0.0978081		0.283332	-0.269443	-0.245819	-0.188512	-0.129923	0.0406035	0.0658735	1.94036	1.99747												1	0.200574	-0.158795	0.185874	-0.199873	-0.166815	0.336643	0.135448
Q1/2006	4.77692	3.13366				0.552402	-0.0542808				1	-0.208081	0.116744	-0.267938	0.389282	-0.186958	0.154472	0.201286	-0.190595	0.113767		0.27893	-0.100247	-0.137818	-0.120323	-0.118108	4.59332	4.84818	1.96867	2.03059												1	-0.102568	0.200574	-0.158795	0.185874	-0.186319	0.328728	0.159914
Q2/2006	1.19348	3.20429				-0.538827	-0.0237812				1	0.552402	-0.208081	0.116744	-0.267938	-0.198326	0.221024	0.228803	-0.202749	0.158083		0.405161	-0.189867	-0.29706	-0.308976	-0.211365	1.31316	1.15635	1.97899	2.0384												1	-0.0542808	-0.102568	0.200574	-0.158795	-0.1975	0.334272	0.155827
Q3/2006	0.357592	2.78095				-0.793372	-0.206566				1	-0.538827	0.552402	-0.208081	0.116744	-0.234418	0.249294	0.204198	-0.172698	0.14013		0.420925	-0.203651	-0.0532571	-0.200083	-0.216194	3.75025	3.59242	1.98968	2.04079												1	-0.0237812	-0.0542808	-0.102568	0.200574	-0.196982	0.31982	0.163179
Q4/2006	3.11867	1.39606				0.0474322	-0.804512				1	-0.793372	-0.538827	0.552402	-0.208081	-0.243027	0.235172	0.140364	-0.187074	0.14268		0.331143	-0.638267	-0.519772	-0.398432	-0.282225	5.07031	1.17191	1.95281	1.97654												1	-0.206566	-0.0237812	-0.0542808	-0.102568	-0.203722	0.321952	0.177268
Q1/2007	0.247039	4.46986				-0.827038	0.522644				1	0.0474322	-0.793372	-0.538827	0.552402	-0.216611	0.244001	0.0994573	-0.235177	0.133192		0.241473	-0.0836483	-0.324873	-0.235117	-0.172754	5.95936	4.61635	1.99657	2.01129												1	-0.804512	-0.206566	-0.0237812	-0.0542808	-0.19093	0.289097	0.181927
Q2/2007	3.04803	2.23094				0.0259223	-0.444041				1	-0.827038	0.0474322	-0.793372	-0.538827	-0.251169	0.284242	0.052013	-0.207032	0.121473		0.250697	-0.384981	-0.117488	-0.337478	-0.439504	1.82073	2.33598	2.01076	2.02935												1	0.522644	-0.804512	-0.206566	-0.0237812	-0.206451	0.291402	0.186461
Q3/2007	2.68134	1.38497				-0.0857427	-0.809298				1	0.0259223	-0.827038	0.0474322	-0.793372	-0.240749	0.297521	0.0524021	-0.180721	0.142562		0.311764	-0.398052	-0.509807	-0.370423	-0.361788	1.05181	0.821729	1.98763	2.01614												1	-0.444041	0.522644	-0.804512	-0.206566	-0.21083	0.313601	0.188037
Q4/2007	1.4251	1.73759				-0.468296	-0.65705				1	-0.0857427	0.0259223	-0.827038	0.0474322	-0.232895	0.280654	0.0397513	-0.206999	0.182667		0.296074	-0.0760686	-0.201594	-0.239117	-0.292689	1.65898	0.332542	1.90462	1.92771												1	-0.809298	-0.444041	0.522644	-0.804512	-0.208756	0.295362	0.190269
Q1/2008	-2.73977	2.27959				-1.73658	-0.423037				1	-0.468296	-0.0857427	0.0259223	-0.827038	-0.249953	0.291962	0.0765266	-0.221158	0.185616		0.332946	-0.552483	-0.414091	-0.444176	-0.366413	15.1197	20.2449	1.97963	2.05636												1	-0.65705	-0.809298	-0.444041	0.522644	-0.210403	0.301975	0.210809
Q2/2008	1.98058	1.94135				-0.299138	-0.569075				1	-1.73658	-0.468296	-0.0857427	0.0259223	-0.222694	0.303516	0.0782349	-0.22333	0.180918		0.339338	-0.762572	-0.42332	-0.329652	-0.307833	2.31602	0.000815114	1.79769	1.88844												1	-0.423037	-0.65705	-0.809298	-0.444041	-0.216859	0.282328	0.221468
Q3/2008	-1.92167	2.73119				-1.48745	-0.22805				1	-0.299138	-1.73658	-0.468296	-0.0857427	-0.248675	0.281118	0.0871928	-0.145132	0.161769		0.384948	-0.430092	-0.500935	-0.328174	-0.34179	12.0563	14.154	1.83067	1.95191												1	-0.569075	-0.423037	-0.65705	-0.809298	-0.23083	0.285108	0.236434
Q4/2008	-8.54253	0.56663				-3.50364	-1.16263				1	-1.48745	-0.299138	-1.73658	-0.468296	-0.240317	0.299606	0.0973912	-0.138697	0.135432		0.393732	-0.537663	-0.219387	-0.131287	-0.342899	94.8643	107.732	2.50781	2.67389												1	-0.22805	-0.569075	-0.423037	-0.65705	-0.219836	0.278196	0.242261
Q1/2009	-5.58083	0.989232				-2.60174	-0.980165				1	-3.50364	-1.48745	-0.299138	-1.73658	-0.266013	0.30906	0.0868224	-0.129669	0.129941		0.396154	-1.66486	-0.739968	-0.58536	-0.445606	9.46549	50.1326	2.51554	2.8775												1	-1.16263	-0.22805	-0.569075	-0.423037	-0.255356	0.260853	0.215605
Q2/2009	-0.541843	-0.668785				-1.06727	-1.69604				1	-2.60174	-3.50364	-1.48745	-0.299138	-0.259285	0.322829	0.104764	-0.0883535	0.0987802		0.43802	-1.36439	-0.930741	-0.348587	-0.418331	0.951974	4.54123	2.51978	2.89758												1	-0.980165	-1.16263	-0.22805	-0.569075	-0.249908	0.250741	0.208658
Q3/2009	1.30521	-0.0873487				-0.504804	-1.44499				1	-1.06727	-2.60174	-3.50364	-1.48745	-0.270717	0.320319	0.0287944	-0.0719461	0.100535		0.377702	-0.584967	-0.80969	-0.437182	-0.543699	0.0692962	0.0163134	2.46539	2.83403												1	-1.69604	-0.980165	-1.16263	-0.22805	-0.241359	0.233904	0.213094
Q4/2009	3.8536	1.18583				0.271234	-0.895283				1	-0.504804	-1.06727	-2.60174	-3.50364	-0.276232	0.28971	-0.0466507	-0.0816896	0.113875		0.275246	-0.559133	-0.653878	-0.779832	-0.721324	7.43546	10.6238	2.50644	2.88011												1	-1.44499	-1.69604	-0.980165	-1.16263	-0.22617	0.238207	0.192342
Q1/2010	1.72765	1.40567				-0.376161	-0.800362				1	0.271234	-0.504804	-1.06727	-2.60174	-0.238071	0.310392	-0.0863816	-0.0729458	0.138603		0.289668	-0.393033	-0.623759	-0.681791	-0.732316	0.00306975	1.36787	2.45886	2.87309												1	-0.895283	-1.44499	-1.69604	-0.980165	-0.230652	0.241917	0.17916
Q2/2010	3.84559	1.76937				0.268794	-0.643332				1	-0.376161	0.271234	-0.504804	-1.06727	-0.263151	0.26675	-0.0505417	-0.0405227	0.15575		0.331435	-0.522971	-0.494598	-0.511156	-0.573147	6.76021	7.64418	2.49918	2.91261												1	-0.800362	-0.895283	-1.44499	-1.69604	-0.20929	0.230774	0.189017
Q3/2010	2.69064	1.82576				-0.0829111	-0.618981				1	0.268794	-0.376161	0.271234	-0.504804	-0.245233	0.276972	-0.0612749	-0.00704623	0.139715		0.348366	-0.220175	-0.473256	-0.447392	-0.40703	0.20318	1.13286	2.499	2.91827												1	-0.643332	-0.800362	-0.895283	-1.44499	-0.196604	0.250457	0.201577
Q4/2010	2.51255	2.04505				-0.137143	-0.524303				1	-0.0829111	0.268794	-0.376161	0.271234	-0.24589	0.249458	-0.0876879	-0.0118888	0.150056		0.299938	-0.24497	-0.28214	-0.305473	-0.267949	0.12538	0.184512	2.48412	2.89226												1	-0.618981	-0.643332	-0.800362	-0.895283	-0.206236	0.264282	0.185039
Q1/2011	-1.54795	1.76228				-1.37365	-0.646391				1	-0.137143	-0.0829111	0.268794	-0.376161	-0.229207	0.282724	-0.111398	0.0309927	0.136329		0.338648	-0.301696	-0.359371	-0.364336	-0.358111	12.3913	11.1214	2.56058	2.95093												1	-0.524303	-0.618981	-0.643332	-0.800362	-0.215564	0.261115	0.187244
Q2/2011	2.89929	2.90043				-0.0193742	-0.154981				1	-1.37365	-0.137143	-0.0829111	0.268794	-0.24455	0.328855	-0.125072	0.0290388	0.171005		0.403827	-0.63557	-0.265152	-0.272737	-0.28975	4.09454	0.788321	2.56806	2.94568												1	-0.646391	-0.524303	-0.618981	-0.643332	-0.220896	0.250571	0.194244
Q3/2011	0.842183	2.40954				-0.645804	-0.366926				1	-0.0193742	-1.37365	-0.137143	-0.0829111	-0.205715	0.319722	-0.141512	0.0126681	0.1768		0.367678	-0.033917	-0.299916	-0.286118	-0.291943	4.03748	1.35031	2.51836	2.86011												1	-0.154981	-0.646391	-0.524303	-0.618981	-0.218149	0.246837	0.191285
Q4/2011	4.478	0.575856				0.461376	-1.15865				1	-0.645804	-0.0193742	-1.37365	-0.137143	-0.2041	0.302214	-0.0894746	-0.023461	0.150389		0.339667	-0.385936	-0.255465	-0.327028	-0.308609	7.742	6.3934	2.55778	2.85731												1	-0.366926	-0.154981	-0.646391	-0.524303	-0.212534	0.244705	0.182147
Q1/2012	2.64504	2.10498				-0.0967965	-0.498425				1	0.461376	-0.645804	-0.0193742	-1.37365	-0.218036	0.339843	-0.0816672	0.0170956	0.124344		0.399616	-0.179636	-0.469079	-0.525699	-0.567941	0.0740015	2.39373	2.54819	2.86964												1	-1.15865	-0.366926	-0.154981	-0.646391	-0.263721	0.23359	0.169972
Q2/2012	1.8629	1.82535				-0.334976	-0.619162				1	-0.0967965	0.461376	-0.645804	-0.0193742	-0.222919	0.350069	-0.0673651	0.0320375	0.0891915		0.403933	-0.310303	-0.330213	-0.299094	-0.341496	0.0065647	0.000458379	2.54524	2.86953												1	-0.498425	-1.15865	-0.366926	-0.154981	-0.260945	0.23094	0.192919
Q3/2012	0.478452	2.14508				-0.756568	-0.481112				1	-0.334976	-0.0967965	0.461376	-0.645804	-0.197185	0.366851	-0.010281	0.0295601	0.0887117		0.474842	-0.362728	-0.367845	-0.388001	-0.340587	1.67266	1.86601	2.54997	2.87783												1	-0.619162	-0.498425	-1.15865	-0.366926	-0.245518	0.196595	0.183563
Q4/2012	0.08976	1.61747				-0.874932	-0.708916				1	-0.756568	-0.334976	-0.0967965	0.461376	-0.190319	0.343387	0.0125887	0.0387286	0.0460917		0.440796	-0.436814	-0.288739	-0.292737	-0.268629	2.0699	3.96412	2.56225	2.89427												1	-0.481112	-0.619162	-0.498425	-1.15865	-0.250424	0.212214	0.195994
Q1/2013	2.78856	1.55877				-0.0530931	-0.734258				1	-0.874932	-0.756568	-0.334976	-0.0967965	-0.146603	0.338837	0.00826658	0.0706498	-0.0147788		0.402975	-0.471552	-0.367274	-0.317868	-0.319192	1.88831	0.763576	2.55936	2.88467												1	-0.708916	-0.481112	-0.619162	-0.498425	-0.27445	0.232407	0.189523
Q2/2013	0.765642	0.832333				-0.669113	-1.04791				1	-0.0530931	-0.874932	-0.756568	-0.334976	-0.152624	0.316897	-0.0339079	0.0719629	-0.0210046		0.333947	-0.187191	-0.362115	-0.366675	-0.351265	2.5045	1.08945	2.57171	2.88832												1	-0.734258	-0.708916	-0.481112	-0.619162	-0.269371	0.232845	0.173241
Q3/2013	3.07488	1.92259				0.0340967	-0.577175				1	-0.669113	-0.0530931	-0.874932	-0.756568	-0.172151	0.347487	-0.0507944	0.0824523	-0.0376593		0.341485	-0.44561	-0.257216	-0.323831	-0.372642	2.48153	1.78402	2.58355	2.89521												1	-1.04791	-0.734258	-0.708916	-0.481112	-0.276475	0.242004	0.172354
Q4/2013	3.88334	2.0556				0.280291	-0.519745				1	0.0340967	-0.669113	-0.0530931	-0.874932	-0.217315	0.282097	-0.0262396	0.0880229	-0.0600969		0.283783	-0.142232	-0.264436	-0.213231	-0.279707	1.92516	3.38174	2.59492	2.91305												1	-0.577175	-1.04791	-0.734258	-0.708916	-0.291906	0.230918	0.158055
Q1/2014	-0.921869	1.66086				-1.18299	-0.69018				1	0.280291	0.0340967	-0.669113	-0.0530931	-0.230715	0.315281	-0.00766224	0.0554043	-0.085284		0.277739	-0.17515	-0.314039	-0.294575	-0.223831	10.9535	9.92093	2.63294	2.94013												1	-0.519745	-0.577175	-1.04791	-0.734258	-0.281792	0.218561	0.145029
Q2/2014	4.49955	2.24478				0.467939	-0.438063				1	-1.18299	0.280291	0.0340967	-0.669113	-0.222531	0.343504	0.0300464	0.0746777	-0.109772		0.338456	-0.544476	-0.229131	-0.258959	-0.272623	11.0531	5.91413	2.69012	2.96531												1	-0.69018	-0.519745	-0.577175	-1.04791	-0.275961	0.221081	0.140029
Q3/2014	5.08029	1.81877				0.644784	-0.622003				1	0.467939	-1.18299	0.280291	0.0340967	-0.265996	0.34367	-0.043128	0.119049	-0.146559		0.273032	-0.025788	-0.427917	-0.288992	-0.296695	4.84907	9.55848	2.6965	2.99658												1	-0.438063	-0.69018	-0.519745	-0.577175	-0.282277	0.197307	0.148478
Q4/2014	1.9953	0.576692				-0.294656	-1.15828				1	0.644784	0.467939	-1.18299	0.280291	-0.334347	0.367097	-0.0696433	0.166454	-0.192361		0.271546	-0.381069	-0.476953	-0.504994	-0.353682	0.0805242	0.0375715	2.66743	2.99066												1	-0.622003	-0.438063	-0.69018	-0.519745	-0.28707	0.175875	0.142914
Q1/2015	3.18694	-0.0691564				0.068221	-1.43714				1	-0.294656	0.644784	0.467939	-1.18299	-0.323628	0.422899	-0.0679671	0.191761	-0.21326		0.333433	-0.150044	-0.213688	-0.199713	-0.319657	0.513731	1.6224	2.63534	2.97498												1	-1.15828	-0.622003	-0.438063	-0.69018	-0.266313	0.189603	0.125122
Q2/2015	2.70446	2.15568				-0.0787025	-0.476534				1	0.068221	-0.294656	0.644784	0.467939	-0.308685	0.454731	-0.082743	0.179503	-0.107598		0.443893	-0.187891	-0.343203	-0.368938	-0.385712	0.128565	1.01642	2.62528	2.96804												1	-1.43714	-1.15828	-0.622003	-0.438063	-0.264502	0.203948	0.109898
Q3/2015	1.61747	1.34425				-0.409713	-0.826881				1	-0.0787025	0.068221	-0.294656	0.644784	-0.336392	0.431208	-0.0698219	0.169424	-0.0991853		0.431625	-0.488967	-0.522039	-0.65258	-0.642363	0.0677355	0.583678	2.61942	2.96678												1	-0.476534	-1.43714	-1.15828	-0.622003	-0.265151	0.185116	0.110428
Q4/2015	0.484528	0.819861				-0.754718	-1.05329				1	-0.409713	-0.0787025	0.068221	-0.294656	-0.311895	0.46318	-0.0624136	0.139062	-0.0728299		0.466999	-0.465808	-0.50096	-0.486576	-0.542211	0.900103	0.48698	2.61489	2.9676												1	-0.826881	-0.476534	-1.43714	-1.15828	-0.246744	0.190851	0.0978675
Q1/2016	0.578623	0.250844				-0.726064	-1.29897				1	-0.754718	-0.409713	-0.0787025	0.068221	-0.342536	0.438819	-0.112371	0.104246	-0.0746169		0.356077	-0.640975	-0.51799	-0.53837	-0.527819	0.0780743	0.423807	2.52341	2.86133												1	-1.05329	-0.826881	-0.476534	-1.43714	-0.272522	0.196512	0.0692131
Q2/2016	2.21316	2.40617				-0.228314	-0.368382				1	-0.726064	-0.754718	-0.409713	-0.0787025	-0.332797	0.393264	-0.153515	0.10491	-0.123448		0.221211	-0.535738	-0.575838	-0.573989	-0.6086	1.01916	1.55951	2.51537	2.86983												1	-1.29897	-1.05329	-0.826881	-0.476534	-0.278707	0.213257	0.0666807
Q3/2016	2.74226	1.35985				-0.0671911	-0.820146				1	-0.228314	-0.726064	-0.754718	-0.409713	-0.279596	0.368115	-0.140749	0.0894354	-0.108275		0.208527	-0.284587	-0.46062	-0.571302	-0.580363	0.509646	2.83984	2.44259	2.80755												1	-0.368382	-1.29897	-1.05329	-0.826881	-0.277287	0.193448	0.0967276
Q4/2016	1.74304	2.00704				-0.371475	-0.540713				1	-0.0671911	-0.228314	-0.726064	-0.754718	-0.279103	0.38839	-0.168891	0.0498	-0.126672		0.142627	-0.207196	-0.335441	-0.414701	-0.539031	0.291025	0.302753	1.73517	2.12725												1	-0.820146	-0.368382	-1.29897	-1.05329	-0.251483	0.196232	0.0976669
Q1/2017	1.22816	1.97833				-0.528267	-0.553109				1	-0.371475	-0.0671911	-0.228314	-0.726064	-0.258244	0.420169	-0.184568	0.110731	-0.159444		0.186888	-0.31144	-0.267626	-0.304827	-0.391744	0.506985	0.20099	1.65253	1.72187												1	-0.540713	-0.820146	-0.368382	-1.29897	-0.250238	0.198163	0.0790379
Q2/2017	3.01394	1.00208				0.0155405	-0.974619				1	-0.528267	-0.371475	-0.0671911	-0.228314	-0.283263	0.402582	-0.192719	0.100818	-0.192917		0.117764	-0.387072	-0.291576	-0.322478	-0.345327	1.748	1.40431	1.66004	1.69316												1	-0.553109	-0.540713	-0.820146	-0.368382	-0.233932	0.230341	0.107851
Q3/2017	3.10713	2.06639				0.0439196	-0.515088				1	0.0155405	-0.528267	-0.371475	-0.0671911	-0.253822	0.41304	-0.181391	0.0943314	-0.184448		0.141533	-0.174229	-0.361774	-0.353693	-0.360958	0.513182	1.76773	1.66422	1.70925												1	-0.974619	-0.553109	-0.540713	-0.820146	-0.231393	0.204211	0.0886885
Q4/2017	2.84706	2.31927				-0.0352776	-0.405903				1	0.0439196	0.0155405	-0.528267	-0.371475	-0.235721	0.436278	-0.239571	0.102812	-0.152605		0.146914	-0.217906	-0.309919	-0.335906	-0.328296	0.359669	0.925884	1.5964	1.61817												1	-0.515088	-0.974619	-0.553109	-0.540713	-0.221948	0.230684	0.0988031
[truncated: 12 more columns]

## Sheet: Forecast&Persistence_UK
Q1/1960 !Q mag=bil	Quarterly Real GDP Growth (Annualized)	Quarterly GDP Deflator Growth (Annualized)				Standardized Series										Coefficients AR(4) on Real GDP Growth																															Coefficients AR(4) on Inflation Rate (GDP Deflator)
.DESC						Real GDPGrowth	Inflation (GDP Deflator)									Matrix bm in the Gauss code																															Matrix bm in the Gauss code
.T1
.TN																							Forecast
.LSOURCE											Regressors					Time-Varying Coefficients Estimated						Persistence	One-period ahead	Two-periods ahead	Three-periods ahead	Four-periods ahead	Squared Forecasting Error	Squared Forecasting Error	RMSFE	RMSFE												Regressors					Time-Varying Coefficients Estimated
.DTLM											constant	lag1	lag2	lag3	lag4	intercept	lag1	lag2	lag3	lag4			t+1 with information up to t	t+2 with information up to t	t+3 with information up to t	t+4 with information up to t	One-period ahead	Four-period ahead	One-period ahead	Four-period ahead												constant	lag1	lag2	lag3	lag4	intercept	lag1	lag2
Q1/1960	#N/A	#N/A				#N/A	#N/A				1											#N/A							#N/A	#N/A												1
Q2/1960	-2.8779	1.64514				-1.38766	-0.496416				1											#N/A							#N/A	#N/A												1
Q3/1960	6.02199	1.16268				0.978714	-0.646455				1											#N/A							#N/A	#N/A												1
Q4/1960	2.43516	1.637				0.0250182	-0.498949				1											#N/A							#N/A	#N/A												1
Q1/1961	6.46397	0.758006				1.09623	-0.772303				1											#N/A							#N/A	#N/A												1
Q2/1961	1.60723	0.182941				-0.195121	-0.95114				1	1.09623	0.0250182	0.978714	-1.38766	-0.00578207	-0.216286	0.0176769	-0.110854	0.0865609		-0.222902	-0.471051	#N/A	#N/A	#N/A	1.07696	#N/A	#N/A	#N/A	1											1	-0.772303	-0.498949	-0.646455	-0.496416	-0.0791246	0.325907	0.253635
Q3/1961	-2.09663	2.48767				-1.17993	-0.234402				1	-0.195121	1.09623	0.0250182	0.978714	0.0339188	-0.213645	0.0372868	-0.0825769	0.103905		-0.155031	0.216107	0.197423	#N/A	#N/A	27.5675	#N/A	#N/A	#N/A	1											1	-0.95114	-0.772303	-0.498949	-0.646455	-0.0456768	0.342839	0.234079
Q4/1961	-0.639516	0.441689				-0.792504	-0.870673				1	-1.17993	-0.195121	1.09623	0.0250182	-0.00105914	-0.191623	0.00411067	-0.0904776	0.082832		-0.195158	0.127129	-0.107451	-0.176164	#N/A	11.9627	#N/A	#N/A	#N/A	1											1	-0.234402	-0.95114	-0.772303	-0.498949	-0.071746	0.359479	0.253814
Q1/1962	1.88274	1.82536				-0.121865	-0.44037				1	-0.792504	-1.17993	-0.195121	1.09623	-0.0254746	-0.186154	-0.0523426	-0.110874	0.0813759		-0.267995	0.294655	0.0781871	0.194949	0.182918	2.45399	1.31397	#N/A	#N/A	1											1	-0.870673	-0.234402	-0.95114	-0.772303	-0.0777775	0.399618	0.263313
Q2/1962	3.70075	1.13149				0.361524	-0.656154				1	-0.121865	-0.792504	-1.17993	-0.195121	-0.0407137	-0.140413	-0.0074011	-0.118102	0.14152		-0.124396	0.0940022	0.0761016	0.0750763	-0.049857	1.01232	2.39381	#N/A	#N/A	2											1	-0.44037	-0.870673	-0.234402	-0.95114	-0.0874841	0.408149	0.237371
Q3/1962	2.42288	0.829195				0.0217511	-0.750164				1	0.361524	-0.121865	-0.792504	-1.17993	-0.0657275	-0.16368	0.0400409	-0.0884311	0.146107		-0.065963	-0.232096	-0.126399	-0.0632144	-0.124363	0.911479	0.301983	#N/A	#N/A	2											1	-0.656154	-0.44037	-0.870673	-0.234402	-0.0941897	0.418021	0.224223
Q4/1962	-1.44491	1.16493				-1.00665	-0.645755				1	0.0217511	0.361524	-0.121865	-0.792504	0.000922021	-0.220299	0.00482334	-0.0876684	0.15109		-0.152054	-0.111182	-0.118276	-0.121424	-0.114851	11.3423	11.2495	#N/A	#N/A	2											1	-0.750164	-0.656154	-0.44037	-0.870673	-0.0557289	0.4165	0.238158
Q1/1963	2.05712	0.98847				-0.0754999	-0.700632				1	-1.00665	0.0217511	0.361524	-0.121865	0.0579302	-0.211654	0.0472588	-0.0503881	0.184306		-0.0304773	0.231342	-0.0245867	-0.105437	-0.051077	1.33178	0.00843716	#N/A	#N/A	2											1	-0.645755	-0.750164	-0.656154	-0.44037	-0.0786939	0.427622	0.260328
Q2/1963	16.7975	0.998661				3.84381	-0.697463				1	-0.0754999	-1.00665	0.0217511	0.361524	0.0930288	-0.181726	0.000223822	-0.0640286	0.187133		-0.0583978	0.172784	0.0269278	0.0585179	0.0201404	190.623	206.805	#N/A	#N/A	3											1	-0.700632	-0.645755	-0.750164	-0.656154	-0.0782175	0.447073	0.256923
Q3/1963	2.02966	0.673181				-0.0828001	-0.798682				1	3.84381	-0.0754999	-1.00665	0.0217511	0.0392106	-0.128343	0.00892342	-0.0813155	0.136913		-0.0638223	-0.369956	0.130137	0.117896	0.000945498	1.16637	0.0992031	#N/A	#N/A	3											1	-0.697463	-0.700632	-0.645755	-0.750164	-0.050105	0.432081	0.260419
Q4/1963	8.78555	3.2084				1.71351	-0.0102646				1	-0.0828001	3.84381	-0.0754999	-1.00665	0.00080194	-0.145104	0.0478905	-0.0524264	0.140101		-0.00953958	0.0598246	-0.0106921	-0.114124	-0.162939	38.6819	49.8053	#N/A	#N/A	3											1	-0.798682	-0.697463	-0.700632	-0.645755	-0.0556063	0.444615	0.277873
Q1/1964	2.39948	0.753753				0.0155305	-0.773626				1	1.71351	-0.0828001	3.84381	-0.0754999	0.0395777	-0.146554	0.0375241	-0.0320921	0.126579		-0.014543	-0.347564	-0.223939	-0.285617	0.0886056	1.86484	0.0755335	#N/A	#N/A	3											1	-0.0102646	-0.798682	-0.697463	-0.700632	-0.0831679	0.462105	0.288752
Q2/1964	6.84643	1.39958				1.19792	-0.572783				1	0.0155305	1.71351	-0.0828001	3.84381	0.0593436	-0.110737	-0.00328464	-0.0571404	0.109666		-0.0614964	0.478262	0.644016	0.579023	0.632123	7.32581	4.5282	#N/A	#N/A	4											1	-0.773626	-0.0102646	-0.798682	-0.697463	-0.105523	0.493236	0.279078
Q3/1964	1.57448	1.88411				-0.203827	-0.422099				1	1.19792	0.0155305	1.71351	-0.0828001	0.0759884	-0.0504876	0.00413616	-0.0532775	0.14716		0.0475306	-0.0879041	-0.10066	-0.133318	-0.108678	0.190082	0.128059	#N/A	#N/A	4											1	-0.572783	-0.773626	-0.0102646	-0.798682	-0.0775177	0.475101	0.28065
Q4/1964	6.04031	1.74406				0.983586	-0.465654				1	-0.203827	1.19792	0.0155305	1.71351	0.069284	-0.127469	0.0298444	-0.0299623	0.128971		0.00138394	0.351546	0.336714	0.255946	0.311331	5.65054	6.39246	#N/A	#N/A	4											1	-0.422099	-0.572783	-0.773626	-0.0102646	-0.0619301	0.501917	0.286625
Q1/1965	-1.11726	2.25857				-0.919532	-0.305647				1	0.983586	-0.203827	1.19792	0.0155305	0.11209	-0.199138	0.0390577	-0.0114721	0.138817		-0.0327357	-0.103327	-0.0155	-0.00291192	0.00570642	9.42321	12.109	#N/A	#N/A	4											1	-0.465654	-0.422099	-0.572783	-0.773626	-0.030593	0.542487	0.272229
Q2/1965	0.425245	1.3689				-0.509396	-0.582323				1	-0.919532	0.983586	-0.203827	1.19792	0.0980223	-0.200154	0.0491118	0.0233274	0.110872		-0.0168429	0.458437	0.339713	0.242356	0.258497	13.2496	8.3407	#N/A	#N/A	5											1	-0.305647	-0.465654	-0.422099	-0.572783	-0.00727613	0.541791	0.278527
Q3/1965	3.3103	1.70508				0.257707	-0.477777				1	-0.509396	-0.919532	0.983586	-0.203827	0.0570319	-0.236995	0.0323201	0.078055	0.0627146		-0.0639049	0.212028	-0.0385499	0.000826144	0.00110741	0.0295156	0.931353	#N/A	#N/A	5											1	-0.582323	-0.305647	-0.465654	-0.422099	0.00661489	0.540826	0.271157
Q4/1965	2.4694	2.64677				0.034122	-0.184924				1	0.257707	-0.509396	-0.919532	0.983586	0.0244363	-0.250121	0.0501007	0.108616	0.043365		-0.0480394	-0.122765	-0.0197702	0.215855	0.262917	0.348157	0.740447	#N/A	#N/A	5											1	-0.477777	-0.582323	-0.305647	-0.465654	0.029697	0.575732	0.272148
Q1/1966	0.658863	2.63686				-0.44728	-0.188006				1	0.034122	0.257707	-0.509396	-0.919532	0.0408606	-0.281554	0.0504977	0.0765766	0.0832631		-0.0712163	-0.0713038	-0.0271502	-0.0288589	-0.0383312	1.9995	2.36559	#N/A	#N/A	5											1	-0.184924	-0.477777	-0.582323	-0.305647	0.022072	0.557308	0.258184
Q2/1966	2.31678	3.22272				-0.00645989	-0.00580942				1	-0.44728	0.034122	0.257707	-0.509396	0.037956	-0.236106	0.0131082	0.0593319	0.100881		-0.0627851	0.107911	0.03998	0.0309775	0.0478355	0.185025	0.0416992	#N/A	#N/A	6											1	-0.188006	-0.184924	-0.477777	-0.582323	0.0298011	0.575443	0.240572
Q3/1966	1.31714	4.03099				-0.272253	0.24555				1	-0.00645989	-0.44728	0.034122	0.257707	0.0547257	-0.245929	-0.0603271	0.120563	0.13147		-0.0542228	0.121292	0.0346367	0.0500739	0.0131692	2.19073	1.15233	#N/A	#N/A	6											1	-0.00580942	-0.188006	-0.184924	-0.477777	0.0173236	0.56289	0.245399
Q4/1966	-1.67665	3.66555				-1.06826	0.131902				1	-0.272253	-0.00645989	-0.44728	0.034122	0.0528855	-0.209807	-0.057158	0.0500752	0.116432		-0.100458	0.0919507	-0.0241535	0.00809679	0.0261619	19.0405	16.9424	#N/A	#N/A	6											1	0.24555	-0.00580942	-0.188006	-0.184924	0.0246873	0.550838	0.226269
Q1/1967	5.40966	1.37159				0.815902	-0.581486				1	-1.06826	-0.272253	-0.00645989	-0.44728	0.0579146	-0.208179	-0.0532088	0.0745361	0.103772		-0.0830798	0.247895	-0.00324607	-0.00623418	-0.00222103	4.56362	9.46757	#N/A	#N/A	6											1	0.131902	0.24555	-0.00580942	-0.188006	0.0267879	0.539854	0.225619
Q2/1967	5.575	2.37684				0.859864	-0.268868				1	0.815902	-1.06826	-0.272253	-0.00645989	0.112612	-0.251801	-0.0245178	0.0703851	0.060679		-0.145255	-0.0861966	0.0421861	0.0339256	0.0714901	12.6601	8.79154	#N/A	#N/A	7											1	-0.581486	0.131902	0.24555	-0.00580942	0.0216232	0.532106	0.213344
Q3/1967	1.75577	3.49303				-0.155625	0.0782537				1	0.859864	0.815902	-1.06826	-0.272253	0.0861493	-0.235226	-0.0220992	0.0294244	0.0590106		-0.16889	-0.181643	0.022602	-0.0719345	0.0188588	0.00957468	0.430639	#N/A	#N/A	7											1	-0.268868	-0.581486	0.131902	0.24555	0.0172654	0.528491	0.251163
Q4/1967	2.12452	4.45937				-0.0575781	0.378772				1	-0.155625	0.859864	0.815902	-1.06826	0.11498	-0.234507	-0.0186084	0.0409991	0.0699807		-0.142136	0.0941676	0.0708425	0.10164	-0.0217338	0.325712	0.0181736	#N/A	#N/A	7											1	0.0782537	-0.268868	-0.581486	0.131902	0.0225167	0.551812	0.274682
Q1/1968	14.2845	4.41763				3.17562	0.36579				1	-0.0575781	-0.155625	0.859864	0.815902	0.148131	-0.271315	-0.01958	0.0725643	0.0868774		-0.131453	0.300079	0.188144	0.146947	0.129906	116.961	131.214	#N/A	#N/A	7											1	0.378772	0.0782537	-0.268868	-0.581486	0.013947	0.55648	0.283277
Q2/1968	-1.73543	4.46464				-1.08389	0.380409				1	3.17562	-0.0575781	-0.155625	0.859864	0.143878	-0.307486	-0.0627173	0.100288	0.119244		-0.150671	-0.742044	0.131252	0.1229	0.0954142	1.653	19.6723	#N/A	#N/A	8											1	0.36579	0.378772	0.0782537	-0.268868	0.0139495	0.555925	0.289793
Q3/1968	7.88135	3.71104				1.4731	0.146051				1	-1.08389	3.17562	-0.0575781	-0.155625	0.153458	-0.32698	-0.0259501	0.141764	0.144229		-0.0669369	0.394854	0.148548	0.088946	0.0756278	16.445	27.6239	#N/A	#N/A	8											1	0.380409	0.36579	0.378772	0.0782537	0.0277012	0.549922	0.248498
Q4/1968	1.59857	5.49867				-0.197423	0.70198				1	1.4731	-1.08389	3.17562	-0.0575781	0.156386	-0.241614	-0.0159134	0.116882	0.150835		0.0101901	0.180202	0.49436	0.456352	0.138201	2.01708	1.59333	#N/A	#N/A	8											1	0.146051	0.380409	0.36579	0.378772	0.0287705	0.576956	0.242722
Q1/1969	-0.891219	4.0587				-0.859429	0.254169				1	-0.197423	1.4731	-1.08389	3.17562	0.179085	-0.263088	0.0466171	0.132012	0.159946		0.0754862	0.664536	0.441713	0.285926	0.298496	32.8512	18.9654	4.09693	#N/A	8											1	0.70198	0.146051	0.380409	0.36579	0.038894	0.583742	0.194666
Q2/1969	2.91254	4.70847				0.151948	0.456239				1	-0.859429	-0.197423	1.4731	-1.08389	0.138937	-0.243943	0.0782241	0.130581	0.110772		0.0756341	0.405439	0.0161515	0.0554838	-0.0532153	0.908924	0.595386	4.09629	#N/A												1	0.254169	0.70198	0.146051	0.380409	0.027694	0.588655	0.176011
Q3/1969	2.24996	6.05363				-0.0242251	0.874564				1	0.151948	-0.859429	-0.197423	1.4731	0.135248	-0.245318	0.0367947	0.184954	0.112573		0.0890033	0.195667	0.110203	0.415368	0.379209	0.683945	2.30221	3.99242	#N/A												1	0.456239	0.254169	0.70198	0.146051	0.0529319	0.587729	0.162749
Q4/1969	2.04142	6.3901				-0.0796739	0.979202				1	-0.0242251	0.151948	-0.859429	-0.197423	0.164956	-0.23102	0.0574276	0.212844	0.104831		0.144082	-0.0243412	-0.0883407	0.00967448	0.126709	0.0433078	0.602488	3.9455	4.13447												1	0.874564	0.456239	0.254169	0.70198	0.0571977	0.6058	0.153417
Q1/1970	-2.56327	7.85157				-1.30401	1.4337				1	-0.0796739	-0.0242251	0.151948	-0.859429	0.149112	-0.25638	0.0195766	0.209615	0.09324		0.0660514	0.120782	0.111435	0.0954741	0.102939	28.7146	27.9999	4.04816	4.23412												1	0.979202	0.874564	0.456239	0.254169	0.0595724	0.576412	0.143119
Q2/1970	9.32243	6.61448				1.85626	1.04898				1	-1.30401	-0.0796739	-0.0242251	0.151948	0.145978	-0.24124	0.0533264	0.202701	0.0779589		0.0927462	0.463243	0.125676	0.148587	0.161871	27.4483	40.6096	4.14894	4.37287												1	1.4337	0.979202	0.874564	0.456239	0.0497594	0.555028	0.131042
Q3/1970	3.94612	4.37834				0.426764	0.353573				1	1.85626	-1.30401	-0.0796739	-0.0242251	0.137094	-0.219093	0.0628933	0.250688	0.0224196		0.116908	-0.372129	-0.0533509	0.100297	0.129309	9.02771	1.25153	4.1794	4.37626												1	1.04898	1.4337	0.979202	0.874564	0.0635512	0.523403	0.176858
Q4/1970	3.48047	5.81093				0.302954	0.799089				1	0.426764	1.85626	-1.30401	-0.0796739	0.136991	-0.191365	0.0822805	0.268061	0.0109454		0.169923	-0.142368	0.00668634	-0.0869825	0.143748	2.8051	0.358526	4.14736	4.3372												1	0.353573	1.04898	1.4337	0.979202	0.0863947	0.52571	0.207251
Q1/1971	-2.36844	5.96972				-1.2522	0.848468				1	0.302954	0.426764	1.85626	-1.30401	0.150694	-0.180116	0.018742	0.234017	-0.0595156		0.0131277	0.616131	0.682669	0.548333	0.156358	49.3754	28.0642	4.32458	4.43712												1	0.799089	0.353573	1.04898	1.4337	0.08824	0.566295	0.234362
Q2/1971	7.08125	5.03723				1.26036	0.558478				1	-1.2522	0.302954	0.426764	1.85626	0.127656	-0.119774	0.0021656	0.238391	-0.0357808		0.0850019	0.313611	0.0347899	0.129355	-0.0342923	12.6785	23.7086	3.62508	3.73715												1	0.848468	0.799089	0.353573	1.04898	0.0863149	0.557334	0.213245
Q3/1971	6.89969	4.00433				1.21209	0.23726				1	1.26036	-1.2522	0.302954	0.426764	0.100884	-0.152342	0.0143408	0.220431	-0.0295141		0.0529165	-0.0548938	0.144333	0.201472	0.134915	22.7059	16.4123	3.71676	3.80474												1	0.558478	0.848468	0.799089	0.353573	0.105712	0.557375	0.21721
Q4/1971	1.57945	3.88582				-0.202506	0.200404				1	1.21209	1.26036	-1.2522	0.302954	0.0984144	-0.176962	0.0016327	0.248714	-0.0165937		0.0567914	-0.430489	-0.157646	-0.198307	0.241212	0.735196	2.78494	3.55365	3.60648												1	0.23726	0.558478	0.848468	0.799089	0.0995421	0.548491	0.206664
Q1/1972	0.419706	6.23961				-0.510869	0.932402				1	-0.202506	1.21209	1.26036	-1.2522	0.0898687	-0.17768	0.0355738	0.265866	0.0123182		0.136078	0.48863	0.510821	0.438893	0.271287	14.1308	8.65342	3.60718	3.64345												1	0.200404	0.23726	0.558478	0.848468	0.10564	0.533247	0.203886
Q2/1972	10.5658	3.06381				2.18686	-0.0552304				1	-0.510869	-0.202506	1.21209	1.26036	0.146707	-0.190747	0.0305712	0.266032	0.0105678		0.116423	0.573735	0.333622	0.287864	-0.0175371	36.8074	68.7352	3.7327	3.90912												1	0.932402	0.200404	0.23726	0.558478	0.120323	0.539018	0.200304
Q3/1972	1.08589	4.16473				-0.333737	0.287142				1	2.18686	-0.510869	-0.202506	1.21209	0.130395	-0.183955	0.0592404	0.257505	-0.0307586		0.102032	-0.391581	-0.0194136	0.00906416	-0.0788741	0.0473278	0.918787	3.7321	3.91228												1	-0.0552304	0.932402	0.200404	0.23726	0.119228	0.537358	0.206679
Q4/1972	6.20946	6.30209				1.02856	0.951831				1	-0.333737	2.18686	-0.510869	-0.202506	0.11593	-0.183317	0.102495	0.214068	-0.018075		0.115171	0.295551	0.206656	0.0299021	0.227542	7.60008	9.07578	3.74026	3.92298												1	0.287142	-0.0552304	0.932402	0.200404	0.13862	0.511071	0.216231
Q1/1973	19.3463	4.6407				4.52148	0.435161				1	1.02856	-0.333737	2.18686	-0.510869	0.126398	-0.223051	0.0818633	0.175177	-0.0284584		0.00553081	0.267281	0.504914	0.648022	0.287642	255.998	253.554	4.65779	4.78904												1	0.951831	0.287142	-0.0552304	0.932402	0.113478	0.517054	0.216047
Q2/1973	0.569991	5.03514				-0.47091	0.557827				1	4.52148	1.02856	-0.333737	2.18686	0.132676	-0.255623	0.0615079	0.186353	-0.0273813		-0.035144	-1.08193	0.030285	-0.0573068	-0.144669	5.28089	1.50549	4.63098	4.76669												1	0.435161	0.951831	0.287142	-0.0552304	0.122785	0.505577	0.2316
Q3/1973	-3.84502	9.03524				-1.64481	1.8018				1	-0.47091	4.52148	1.02856	-0.333737	0.161005	-0.242253	0.0814083	0.204827	-0.00415248		0.0398299	0.855233	0.888162	0.331201	0.247487	88.4089	50.65	4.92015	4.92697												1	0.557827	0.435161	0.951831	0.287142	0.137391	0.517052	0.231367
Q4/1973	-1.70319	9.16909				-1.07532	1.84343				1	-1.64481	-0.47091	4.52148	1.02856	0.161648	-0.232115	0.126928	0.210216	-0.0353254		0.0697039	1.39781	0.837337	0.653521	0.0725534	86.5162	18.6376	5.18658	4.9834												1	1.8018	0.557827	0.435161	0.951831	0.140373	0.50528	0.252647
Q1/1974	-11.0532	8.21862				-3.56137	1.54785				1	-1.07532	-1.64481	-0.47091	4.52148	0.17094	-0.262527	0.142988	0.198859	-0.00398958		0.0753305	0.10637	-0.630294	-0.0874496	-0.305174	190.282	149.976	5.72577	5.42652												1	1.84343	1.8018	0.557827	0.435161	0.152232	0.484953	0.240121
Q2/1974	5.73072	10.6647				0.901269	2.30855				1	-3.56137	-1.07532	-1.64481	-0.47091	0.114538	-0.244544	0.10595	0.193558	-0.0118475		0.0431169	0.558732	-0.33595	0.156241	0.427486	1.65965	3.17511	5.72979	5.43554												1	1.54785	1.84343	1.8018	0.557827	0.168128	0.484165	0.239868
Q3/1974	2.58415	11.6464				0.0646328	2.61383				1	0.901269	-3.56137	-1.07532	-1.64481	0.148644	-0.264454	0.0993264	0.208363	-0.0102482		0.032987	-0.65064	-0.588076	0.0670702	0.397326	7.23676	1.56563	5.74353	5.43673												1	2.30855	1.54785	1.84343	1.8018	0.14036	0.493607	0.244863
Q4/1974	-5.84966	11.6926				-2.17782	2.62821				1	0.0646328	0.901269	-3.56137	-1.07532	0.0968297	-0.284686	0.0632943	0.249064	0.0512964		0.0789679	-0.806693	-0.32081	-0.359046	0.130739	26.5924	75.3847	5.76404	5.60217												1	2.61383	2.30855	1.54785	1.84343	0.152886	0.483655	0.206833
Q1/1975	0.196645	9.14148				-0.570178	1.83484				1	-2.17782	0.0646328	0.901269	-3.56137	0.094863	-0.272765	0.0600715	0.183158	0.0822158		0.0526804	0.565053	0.372363	0.393146	0.290374	18.2293	10.475	5.80097	5.60498												1	2.62821	2.61383	2.30855	1.54785	0.160141	0.458558	0.2246
Q2/1975	-6.59439	6.50705				-2.37584	1.01557				1	-0.570178	-2.17782	0.0646328	0.901269	0.0588755	-0.304428	0.102596	0.198775	0.0785202		0.0754629	0.0926342	-0.104152	0.00209355	-0.131996	86.1901	71.2173	5.99575	5.77638												1	1.83484	2.62821	2.61383	2.30855	0.138347	0.443743	0.236713
Q3/1975	-1.35187	7.18187				-0.981911	1.22543				1	-2.37584	-0.570178	-2.17782	0.0646328	0.0780474	-0.305921	0.0843173	0.192509	0.0876701		0.0585756	0.343206	-0.455645	-0.236356	-0.0778003	24.8376	11.5623	6.06011	5.80642												1	1.01557	1.83484	2.62821	2.61383	0.0959531	0.444562	0.259618
Q4/1975	4.49199	7.10075				0.571904	1.2002				1	-0.981911	-2.37584	-0.570178	-2.17782	0.0804574	-0.299642	0.0639596	0.156718	0.0569577		-0.0220058	0.00931965	-0.527965	-0.0772497	0.0775193	4.47689	3.45726	6.0708	5.81566												1	1.22543	1.01557	1.83484	2.62821	0.0783666	0.456094	0.255614
Q1/1976	6.37427	4.65887				1.07238	0.440812				1	0.571904	-0.981911	-2.37584	-0.570178	0.0881273	-0.253602	0.116904	0.135709	0.0632969		0.0623075	-0.530212	-0.389951	-0.238856	0.00928811	36.3286	15.9862	5.8596	5.49737												1	1.2002	1.22543	1.01557	1.83484	0.0843194	0.416156	0.249327
Q2/1976	-0.708854	4.3282				-0.81094	0.337978				1	1.07238	0.571904	-0.981911	-2.37584	0.0680876	-0.223947	0.106614	0.147344	0.026882		0.0568932	-0.319641	0.00581051	-0.0913067	-0.035618	3.41423	8.50287	5.86429	5.46553												1	0.440812	1.2002	1.22543	1.01557	0.130055	0.425647	0.242145
Q3/1976	4.94576	5.10825				0.692558	0.580563				1	-0.81094	1.07238	0.571904	-0.981911	0.0321906	-0.228453	0.107546	0.159741	0.0415353		0.0803688	0.383356	0.311872	0.0401309	0.0284087	1.35234	6.23924	5.82394	5.40405												1	0.337978	0.440812	1.2002	1.22543	0.116609	0.428901	0.231269
Q4/1976	8.35127	7.2151				1.59804	1.23576				1	0.692558	-0.81094	1.07238	0.571904	0.0234395	-0.207728	0.122536	0.170925	-0.049243		0.0364907	-0.064659	0.0524563	0.137549	0.0428743	39.1047	34.2102	5.92261	5.49755												1	0.580563	0.337978	0.440812	1.2002	0.0873218	0.452484	0.223197
Q1/1977	0.198819	6.4473				-0.5696	0.996988				1	1.59804	0.692558	-0.81094	1.07238	0.0138739	-0.204633	0.131735	0.179317	-0.00612893		0.10029	-0.373892	-0.0696829	-0.0235637	0.0522644	0.541776	5.47007	5.83675	5.45906												1	1.23576	0.580563	0.337978	0.440812	0.071884	0.467203	0.227449
Q2/1977	-2.91221	5.90935				-1.39679	0.829696				1	-0.5696	1.59804	0.692558	-0.81094	-0.00470419	-0.153572	0.193652	0.133754	0.0447244		0.218558	0.448597	0.430059	0.1883	0.0707702	48.1697	30.4642	5.96192	5.54389												1	0.996988	1.23576	0.580563	0.337978	0.0912821	0.446046	0.225955
Q3/1977	2.76213	4.91399				0.111954	0.52015				1	-1.39679	-0.5696	1.59804	0.692558	0.027909	-0.127529	0.132952	0.101938	0.0280509		0.135412	0.312639	0.0608181	0.158927	-0.0693699	0.569682	0.46506	5.96162	5.53871												1	0.829696	0.996988	1.23576	0.580563	0.0789777	0.450237	0.214145
Q4/1977	6.87475	8.61738				1.20545	1.67186				1	0.111954	-1.39679	-0.5696	1.59804	0.0472067	-0.109845	0.148118	0.0759071	0.0928707		0.20705	-0.0668048	-0.210904	0.0681127	-0.0388337	22.8955	21.8998	6.02122	5.59847												1	0.52015	0.829696	0.996988	1.23576	0.0718322	0.474954	0.216382
Q1/1978	3.43631	6.7336				0.291212	1.08602				1	1.20545	0.111954	-1.39679	-0.5696	0.0435247	-0.106425	0.15615	0.0768377	0.107128		0.23369	-0.235631	-0.0877979	-0.0619923	0.0311396	3.92611	0.956731	5.95654	5.52248												1	1.67186	0.52015	0.829696	0.996988	0.0998734	0.490972	0.220275
Q2/1978	4.80796	7.56929				0.655917	1.34591				1	0.291212	1.20545	0.111954	-1.39679	0.0492665	-0.102056	0.131648	0.10791	0.0868751		0.224377	0.0689772	0.1158	-0.0742665	0.000463442	4.8729	6.07693	5.89703	5.42389												1	1.08602	1.67186	0.52015	0.829696	0.138279	0.474258	0.216871
Q3/1978	5.37549	6.52348				0.806817	1.02068				1	0.655917	0.291212	1.20545	0.111954	0.109628	-0.0719845	0.152605	0.0864477	0.0708793		0.237948	0.218996	0.220371	0.0990245	0.0476864	4.88754	8.15143	5.88605	5.44373												1	1.34591	1.08602	1.67186	0.52015	0.140832	0.491334	0.229383
Q4/1978	3.63021	8.41575				0.342768	1.60915				1	0.806817	0.655917	0.291212	1.20545	0.120454	-0.0606325	0.147383	0.0909932	0.0797631		0.257507	0.290854	0.304576	0.172005	0.162101	0.0381204	0.461697	5.8787	5.44403												1	1.02068	1.34591	1.08602	1.67186	0.149574	0.489083	0.214388
Q1/1979	-1.5723	7.54392				-1.04052	1.33802				1	0.342768	0.806817	0.655917	0.291212	0.0751491	-0.0735475	0.149318	0.0735651	0.0312004		0.180536	0.22775	0.304642	0.198467	0.0934661	22.7523	18.1893	5.80751	5.41561												1	1.60915	1.02068	1.34591	1.08602	0.160846	0.469695	0.201322
Q2/1979	17.3511	9.28113				3.99099	1.87827				1	-1.04052	0.342768	0.806817	0.655917	0.08159	-0.0706921	0.168878	0.105368	0.00662561		0.210179	0.302391	0.189399	0.270582	0.207244	192.452	202.509	6.27256	5.90901												1	1.33802	1.60915	1.02068	1.34591	0.147092	0.477853	0.192796
Q3/1979	-8.84112	9.65592				-2.97322	1.99483				1	3.99099	-1.04052	0.342768	0.806817	0.0420688	-0.0388002	0.193902	0.00367862	-0.0283945		0.130386	-0.33619	-0.0740451	0.145615	0.239767	98.3627	146.022	6.45828	6.24233												1	1.87827	1.33802	1.60915	1.02068	0.153464	0.511774	0.22962
Q4/1979	4.17732	8.08091				0.488237	1.50502				1	-2.97322	3.99099	-1.04052	0.342768	0.0443614	-0.0274337	0.160419	-0.0443773	-0.127509		-0.0389013	0.768627	0.815413	0.0305249	0.120169	1.11205	1.91627	6.45919	6.24015												1	1.99483	1.87827	1.33802	1.60915	0.163704	0.501908	0.227657
Q1/1980	-3.90684	8.49658				-1.66125	1.63429				1	0.488237	-2.97322	3.99099	-1.04052	0.0424034	-0.0531314	0.108522	-0.0376375	-0.130555		-0.112803	-0.320561	-0.498118	-0.0105308	0.0918958	25.4247	43.4747	6.48645	6.32674												1	1.50502	1.99483	1.87827	1.33802	0.14027	0.499059	0.239779
Q2/1980	-7.9981	9.21113				-2.74907	1.8565				1	-1.66125	0.488237	-2.97322	3.99099	0.00408441	-0.0379623	0.179244	0.0299442	-0.143809		0.0274163	-0.508309	-0.29672	-0.195615	0.0860287	71.0216	113.694	6.56835	6.43682												1	1.63429	1.50502	1.99483	1.87827	0.15509	0.501253	0.256669
Q3/1980	-0.496832	9.69171				-0.754566	2.00596				1	-2.74907	-1.66125	0.488237	-2.97322	0.04136	-0.0373717	0.205333	0.0440002	-0.13586		0.076101	0.228413	0.167809	0.393174	0.314823	13.6675	16.176	6.60067	6.47375												1	1.8565	1.63429	1.50502	1.99483	0.136196	0.495202	0.255933
Q4/1980	-4.27049	11.8554				-1.75794	2.67882				1	-0.754566	-2.74907	-1.66125	0.488237	0.0385398	-0.0327546	0.196064	0.0775063	-0.201146		0.0396701	-0.702702	-0.671078	-0.213355	-0.0623638	15.7507	40.6663	6.61994	6.54955												1	2.00596	1.8565	1.63429	1.50502	0.135672	0.53477	0.24328
Q1/1981	-0.633247	10.7499				-0.790837	2.33504				1	-1.75794	-0.754566	-2.74907	-1.66125	0.0767268	4.21938e-05	0.238723	0.0999295	-0.152578		0.186116	-0.124722	0.0346964	0.218078	0.265945	6.27624	15.7969	6.00165	5.95539												1	2.67882	2.00596	1.8565	1.63429	0.109791	0.517424	0.248557
Q2/1981	0.969947	8.03497				-0.364566	1.49074				1	-0.790837	-1.75794	-0.754566	-2.74907	0.0823531	0.0716485	0.242381	0.110253	-0.197858		0.226424	0.0603308	0.0011062	0.394108	0.278955	2.55369	5.8577	5.99454	5.9668												1	2.33504	2.67882	2.00596	1.8565	0.107096	0.507552	0.241255
Q3/1981	4.32763	7.63435				0.528202	1.36615				1	-0.364566	-0.790837	-1.75794	-0.754566	0.105874	0.0797268	0.24223	0.119086	-0.189853		0.25119	-0.180846	-0.149529	-0.0135867	0.129748	7.11135	2.24573	5.77875	5.83867												1	1.49074	2.33504	2.67882	2.00596	0.110521	0.502965	0.238431
Q4/1981	0.459598	8.17424				-0.500262	1.53405				1	0.528202	-0.364566	-0.790837	-1.75794	0.130264	0.0740864	0.270528	0.113198	-0.206586		0.251226	0.344416	0.242719	0.346893	0.33275	10.0921	9.8153	5.56828	5.81502												1	1.36615	1.49074	2.33504	2.67882	0.0991976	0.491901	0.238612
Q1/1982	0.624205	6.16109				-0.456495	0.907984				1	-0.500262	0.528202	-0.364566	-0.790837	0.131188	0.0854342	0.303047	0.0892185	-0.145236		0.332464	0.33085	0.420781	0.188147	0.234089	8.76862	6.74582	5.03323	5.4165												1	1.53405	1.36615	1.49074	2.33504	0.108832	0.494235	0.231966
Q2/1982	4.4712	4.97095				0.566376	0.537866				1	-0.456495	-0.500262	0.528202	-0.364566	0.123873	0.106451	0.252185	0.0942862	-0.153309		0.299613	0.0548132	0.107924	0.389718	0.227346	3.70167	1.62584	5.03957	5.41203												1	0.907984	1.53405	1.36615	1.49074	0.0809094	0.502475	0.237224
Q3/1982	1.0544	6.0617				-0.342111	0.877074				1	0.566376	-0.456495	-0.500262	0.528202	0.134746	0.070791	0.272272	0.100757	-0.177614		0.266206	-0.093672	-0.11356	0.119325	0.202838	0.873053	4.20061	5.0198	5.41963												1	0.537866	0.907984	1.53405	1.36615	0.0762556	0.492596	0.215215
Q4/1982	2.8108	5.03208				0.124896	0.556877				1	-0.342111	0.566376	-0.456495	-0.500262	0.175582	0.0829655	0.295511	0.108941	-0.184324		0.303094	0.357048	0.325181	0.159261	0.276262	0.762334	0.324086	4.93874	5.19872												1	0.877074	0.537866	0.907984	1.53405	0.053042	0.509401	0.228418
Q1/1983	7.17744	3.90543				1.28593	0.206505				1	0.124896	-0.342111	0.566376	-0.456495	0.160031	0.0743927	0.258962	0.100737	-0.219522		0.21457	0.237994	0.249952	0.270408	0.187341	15.5337	17.0716	4.93021	5.21851												1	0.556877	0.877074	0.537866	0.907984	0.0430468	0.503576	0.23918
Q2/1983	3.39666	2.86527				0.280669	-0.116971				1	1.28593	0.124896	-0.342111	0.566376	0.123163	0.121309	0.235898	0.105934	-0.209716		0.253425	0.153601	0.051284	0.160164	0.132392	0.228389	0.310993	4.6498	5.00171												1	0.206505	0.556877	0.877074	0.537866	0.0575933	0.490206	0.250751
Q3/1983	4.38008	4.39725				0.542148	0.359453				1	0.280669	1.28593	0.124896	-0.342111	0.103188	0.0498215	0.233599	0.0500401	-0.200912		0.132549	0.492548	0.530122	0.31316	0.36469	0.0347977	0.445441	4.56569	4.96686												1	-0.116971	0.206505	0.556877	0.877074	0.0174623	0.469725	0.248034
Q4/1983	3.4448	3.14725				0.293468	-0.0292797				1	0.542148	0.280669	1.28593	0.124896	0.110637	0.0397208	0.232082	0.0682841	-0.214824		0.125263	0.258288	0.232547	0.333737	0.193165	0.0175062	0.142307	4.55041	4.95642												1	0.359453	-0.116971	0.206505	0.556877	0.0268474	0.476543	0.255412
Q1/1984	2.74793	4.01886				0.108179	0.241778				1	0.293468	0.542148	0.280669	1.28593	0.132395	0.0646707	0.263395	0.073389	-0.19546		0.205995	0.0634223	-0.010365	-0.0144821	0.0352929	0.0283345	0.0751432	4.42401	4.906												1	-0.0292797	0.359453	-0.116971	0.206505	0.0025217	0.464307	0.204936
Q2/1984	-3.50362	3.76767				-1.55404	0.163661				1	0.108179	0.293468	0.542148	0.280669	0.0885508	0.118597	0.275819	0.123761	-0.182959		0.335219	0.198071	0.198723	0.146895	0.125046	43.4233	39.8791	4.56312	5.00493												1	0.241778	-0.0292797	0.359453	-0.116971	-0.00320493	0.471084	0.198916
Q3/1984	2.5943	3.16857				0.0673299	-0.0226499				1	-1.55404	0.108179	0.293468	0.542148	0.077878	0.157887	0.252647	0.0895471	-0.133026		0.367055	-0.185994	0.0790083	0.0775209	0.0152371	0.907723	0.0383845	4.5616	4.98554												1	0.163661	0.241778	-0.0292797	0.359453	-0.0113594	0.427653	0.18757
Q4/1984	7.8677	2.79511				1.46947	-0.138792				1	0.0673299	-1.55404	0.108179	0.293468	0.15552	0.168029	0.227356	0.0710491	-0.145585		0.32085	-0.221525	-0.373463	0.112248	0.137044	40.4468	25.1122	4.5662	4.95694												1	-0.0226499	0.163661	0.241778	-0.0292797	-0.0176193	0.407256	0.195869
Q1/1985	3.36042	2.90098				0.271032	-0.105866				1	1.46947	0.0673299	-1.55404	0.108179	0.113431	0.175293	0.236656	0.0976946	-0.149718		0.359926	0.218935	0.00744264	-0.181628	0.128376	0.0383912	0.287859	4.56447	4.94058												1	-0.138792	-0.0226499	0.163661	0.241778	-0.0192007	0.387453	0.189548
Q2/1985	8.43327	3.06792				1.61984	-0.0539504				1	0.271032	1.46947	0.0673299	-1.55404	0.0900161	0.155562	0.252171	0.128972	-0.137248		0.399457	0.724707	0.738812	0.337433	0.144919	11.3339	30.7709	4.43659	4.94155												1	-0.105866	-0.138792	-0.0226499	0.163661	-0.0238301	0.388256	0.204201
Q3/1985	0.378696	2.44799				-0.521773	-0.246741				1	1.61984	0.271032	1.46947	0.0673299	0.0824038	0.183377	0.281143	0.118754	-0.172756		0.410517	0.618517	0.451378	0.42823	0.188369	18.3921	7.13332	4.49892	4.96259												1	-0.0539504	-0.105866	-0.138792	-0.0226499	-0.0148787	0.404705	0.191433
Q4/1985	0.970289	3.78706				-0.364475	0.169691				1	-0.521773	1.61984	0.271032	1.46947	0.122703	0.242801	0.289405	0.0721723	-0.197272		0.407107	0.194485	0.42956	0.176258	0.164724	4.41939	3.96132	4.43428	4.90578												1	-0.246741	-0.0539504	-0.105866	-0.138792	-0.0117608	0.422669	0.185816
Q1/1986	4.53135	0.83643				0.58237	-0.747914				1	-0.364475	-0.521773	1.61984	0.271032	0.0975251	0.211357	0.306494	0.0832236	-0.179924		0.421151	-0.0533856	0.0823611	0.480607	0.287528	5.71717	1.22964	4.44059	4.90665												1	0.169691	-0.246741	-0.0539504	-0.105866	-0.0257051	0.414696	0.149834
Q2/1986	2.91681	1.81406				0.153083	-0.443885				1	0.58237	-0.364475	-0.521773	1.61984	0.137219	0.228363	0.329682	0.115919	-0.146878		0.527085	-0.148353	-0.36034	-0.158222	0.0849166	1.28526	0.0657274	4.42795	4.88747												1	-0.747914	0.169691	-0.246741	-0.0539504	-0.0225641	0.388158	0.156445
Q3/1986	1.74278	1.79905				-0.159078	-0.448552				1	0.153083	0.58237	-0.364475	-0.521773	0.163861	0.271231	0.360754	0.116343	-0.0682781		0.68005	0.408696	0.329724	0.0685488	0.22509	4.55986	2.08758	4.42679	4.86805												1	-0.443885	-0.747914	0.169691	-0.246741	-0.0454898	0.389496	0.172167
Q4/1986	6.99735	2.02211				1.23805	-0.379184				1	-0.159078	0.153083	0.58237	-0.364475	0.129876	0.234011	0.35032	0.0964289	-0.0764181		0.604342	0.230288	0.422578	0.284647	0.0627059	14.3654	19.5404	4.47708	4.9289												1	-0.448552	-0.443885	-0.747914	0.169691	-0.0580627	0.396671	0.175009
Q1/1987	3.55281	2.61005				0.322188	-0.196343				1	1.23805	-0.159078	0.153083	0.58237	0.114772	0.227411	0.332266	0.0923507	-0.100909		0.551119	0.298833	0.0982956	0.403963	0.208192	0.007715	0.183814	4.39698	4.87149												1	-0.379184	-0.448552	-0.443885	-0.747914	-0.0445365	0.375993	0.190203
Q2/1987	5.73707	2.82874				0.902957	-0.128333				1	0.322188	1.23805	-0.159078	0.153083	0.125351	0.274997	0.340741	0.090449	-0.0687713		0.637416	0.610891	0.563954	0.206514	0.462972	1.2066	2.73828	3.65473	4.18194												1	-0.196343	-0.379184	-0.448552	-0.443885	-0.0606068	0.36335	0.174583
Q3/1987	9.55589	2.40294				1.91834	-0.26075				1	0.902957	0.322188	1.23805	-0.159078	0.117941	0.284695	0.316482	0.0968965	-0.047562		0.650512	0.604504	0.526047	0.472701	0.247	24.4163	39.512	3.32358	3.763												1	-0.128333	-0.196343	-0.379184	-0.448552	-0.0681413	0.357696	0.194392
Q4/1987	4.50141	3.06562				0.574408	-0.0546678				1	1.91834	0.902957	0.322188	1.23805	0.0983197	0.332903	0.312399	0.0475293	-0.0258382		0.666993	1.00235	0.548145	0.422167	0.312319	2.59038	0.971626	3.33052	3.75907												1	-0.26075	-0.128333	-0.196343	-0.379184	-0.051718	0.360272	0.195034
Q1/1988	7.17004	3.18985				1.28397	-0.0160333				1	0.574408	1.91834	0.902957	0.322188	0.074381	0.294075	0.295972	0.000781916	-0.0544807		0.536348	0.794227	1.06588	0.53748	0.453788	3.39261	9.74866	3.22551	3.61617												1	-0.0546678	-0.26075	-0.128333	-0.196343	-0.072129	0.382441	0.232962
Q2/1988	2.38658	3.28577				0.0121011	0.0137963				1	1.28397	0.574408	1.91834	0.902957	0.052268	0.315838	0.283731	0.00951108	0.00753712		0.616618	0.645823	0.430258	0.834133	0.460065	5.68065	2.83849	2.89171	3.1004												1	-0.0160333	-0.0546678	-0.26075	-0.128333	-0.0444243	0.385036	0.228995
Q3/1988	6.07152	4.84977				0.991884	0.500181				1	0.0121011	1.28397	0.574408	1.91834	0.0396204	0.301767	0.315611	0.0189284	0.0454616		0.681768	0.54659	0.640467	0.331915	0.70706	2.80475	1.1475	2.83241	3.02371												1	0.0137963	-0.0160333	-0.0546678	-0.26075	-0.0357103	0.396172	0.228643
Q4/1988	3.43151	2.31009				0.289934	-0.289625				1	0.991884	0.0121011	1.28397	0.574408	0.0189929	0.304882	0.282306	-0.0192337	0.0413678		0.609322	0.323883	0.258799	0.454333	0.26866	0.0163028	0.00640161	2.74423	2.80575												1	0.500181	0.0137963	-0.0160333	-0.0546678	-0.0562543	0.426412	0.235932
Q1/1989	1.73753	4.76826				-0.160475	0.474832				1	0.289934	0.991884	0.0121011	1.28397	-0.000403046	0.321773	0.303567	-0.0633645	0.0660293		0.628004	0.478006	0.450636	0.348828	0.393304	5.76628	4.33785	2.74133	2.74119												1	-0.289625	0.500181	0.0137963	-0.0160333	-0.0155226	0.439492	0.242064
Q2/1989	2.60053	3.4304				0.0689874	0.0587767				1	-0.160475	0.289934	0.991884	0.0121011	0.0414666	0.318851	0.34357	-0.016851	0.106261		0.75183	0.0744833	0.179369	0.229241	0.237461	0.000427251	0.401481	2.72674	2.70991												1	0.474832	-0.289625	0.500181	0.0137963	-0.014508	0.45232	0.24421
Q3/1989	0.373687	3.67028				-0.523105	0.133375				1	0.0689874	-0.160475	0.289934	0.991884	0.0393507	0.295152	0.268399	-0.00953264	0.10942		0.663438	0.122409	0.110594	0.249542	0.250904	5.89403	8.47409	2.71975	2.74559												1	0.0587767	0.474832	-0.289625	0.500181	-0.0413507	0.454595	0.224645
Q4/1989	0.360897	2.15997				-0.526506	-0.336312				1	-0.523105	0.0689874	-0.160475	0.289934	-0.0444189	0.296643	0.258978	-0.0399371	0.155098		0.670782	-0.130351	0.12725	0.135833	0.123199	2.21988	5.9708	2.67414	2.72362												1	0.133375	0.0587767	0.474832	-0.289625	-0.0399821	0.498392	0.20986
Q1/1990	2.71631	4.4819				0.0997718	0.385778				1	-0.526506	-0.523105	0.0689874	-0.160475	-0.0351428	0.299743	0.282551	-0.0114961	0.152588		0.723386	-0.366043	-0.246204	0.0915465	0.104466	3.06921	0.000311754	2.64063	2.68464												1	-0.336312	0.133375	0.0587767	0.474832	-0.0198858	0.481008	0.189199
Q2/1990	2.05524	4.58998				-0.0759983	0.419389				1	0.0997718	-0.526506	-0.523105	0.0689874	-0.0133433	0.365168	0.253364	-0.0237734	0.150123		0.744882	-0.087515	-0.277086	-0.119621	0.106906	0.0018761	0.473206	2.61865	2.67793												1	0.385778	-0.336312	0.133375	0.0587767	-0.0428445	0.484494	0.189937
Q3/1990	-4.17354	4.08255				-1.73216	0.261586				1	-0.0759983	0.0997718	-0.526506	-0.523105	-0.00928122	0.345993	0.24622	-0.0702366	0.142559		0.664536	-0.0486034	-0.0860357	-0.29539	-0.219592	40.0919	32.3617	2.84305	2.83748												1	0.419389	0.385778	-0.336312	0.133375	-0.0513587	0.508345	0.172787
Q4/1990	-1.34229	3.06287				-0.979364	-0.0555205				1	-1.73216	-0.0759983	0.0997718	-0.526506	-0.0266556	0.374137	0.234529	-0.0434579	0.135332		0.700541	-0.768134	-0.126876	-0.148347	-0.278105	0.631118	6.95596	2.84233	2.87377												1	0.261586	0.419389	0.385778	-0.336312	-0.0883967	0.482274	0.170163
Q1/1991	-1.12596	4.05254				-0.921844	0.252252				1	-0.979364	-1.73216	-0.0759983	0.0997718	-0.0327109	0.373684	0.187232	-0.0472609	0.172619		0.686274	-0.702185	-0.70348	-0.0455853	-0.0722546	0.682492	10.2098	2.75948	2.83622												1	-0.0555205	0.261586	0.419389	0.385778	-0.102022	0.506619	0.187388
Q2/1991	-0.487698	2.97214				-0.752137	-0.0837378				1	-0.921844	-0.979364	-1.73216	-0.0759983	-0.0795001	0.384378	0.150212	-0.0862498	0.153826		0.602166	-0.443241	-0.40973	-0.405013	-0.0637132	1.34966	6.70367	2.76582	2.87122												1	0.252252	-0.0555205	0.261586	0.419389	-0.0872541	0.547415	0.192223
Q3/1991	-0.915863	2.8892				-0.865981	-0.109531				1	-0.752137	-0.921844	-0.979364	-1.73216	-0.0990229	0.397687	0.152108	-0.0574181	0.181627		0.674004	-0.796732	-0.570325	-0.57001	-0.544209	0.0678317	1.46453	2.76601	2.87676												1	-0.0837378	0.252252	-0.0555205	0.261586	-0.0908135	0.562587	0.197746
Q4/1991	0.636317	2.53998				-0.453275	-0.218135				1	-0.865981	-0.752137	-0.921844	-0.979364	-0.0529052	0.420523	0.167349	-0.105608	0.148869		0.631132	-0.591382	-0.655228	-0.436443	-0.4583	0.269796	0.000357165	2.76743	2.87599												1	-0.109531	-0.0837378	0.252252	-0.0555205	-0.0666866	0.582345	0.189043
Q1/1992	-0.0320014	1.04036				-0.630973	-0.684495				1	-0.453275	-0.865981	-0.752137	-0.921844	-0.0483881	0.367971	0.105827	-0.11948	0.156537		0.510855	-0.361261	-0.504318	-0.605033	-0.436503	1.02896	0.534941	2.77307	2.87849												1	-0.218135	-0.109531	-0.0837378	0.252252	-0.0426066	0.601634	0.180233
Q2/1992	-0.48728	2.47007				-0.752026	-0.239876				1	-0.630973	-0.453275	-0.865981	-0.752137	-0.0785694	0.391023	0.0767295	-0.0711574	0.100433		0.497028	-0.373992	-0.24356	-0.384465	-0.530164	2.02145	0.696253	2.52906	2.6573												1	-0.684495	-0.218135	-0.109531	-0.0837378	-0.047105	0.613957	0.182
Q3/1992	2.5537	0.758997				0.0565358	-0.771995				1	-0.752026	-0.630973	-0.453275	-0.865981	-0.105867	0.404719	0.151352	-0.0988483	0.0885342		0.545757	-0.537589	-0.327942	-0.257643	-0.365442	4.99294	2.51872	2.55417	2.67184												1	-0.239876	-0.684495	-0.218135	-0.109531	-0.0346311	0.631155	0.183369
Q4/1992	2.79738	2.2292				0.121326	-0.31478				1	0.0565358	-0.752026	-0.630973	-0.453275	-0.0665574	0.423902	0.136858	-0.116995	0.0619323		0.505697	-0.0997641	-0.415021	-0.236124	-0.196759	0.691419	1.43116	2.29814	2.52956												1	-0.771995	-0.239876	-0.684495	-0.218135	-0.0386882	0.618988	0.184755
Q1/1993	2.91853	1.80405				0.153539	-0.446999				1	0.121326	0.0565358	-0.752026	-0.630973	-0.0457723	0.445851	0.121732	-0.119014	0.0510018		0.49957	0.0725246	-0.0522043	-0.336726	-0.23282	0.0928376	2.11146	2.29851	2.5408												1	-0.31478	-0.771995	-0.239876	-0.684495	-0.0365008	0.624818	0.205176
Q2/1993	2.02806	2.78435				-0.0832254	-0.142138				1	0.153539	0.121326	0.0565358	-0.752026	0.00297146	0.473987	0.113271	-0.112567	0.0645786		0.539269	0.0345607	-0.0437511	-0.155529	-0.318401	0.196241	0.782322	2.22151	2.34916												1	-0.446999	-0.31478	-0.771995	-0.239876	-0.0454872	0.650914	0.189959
Q3/1993	3.20616	3.54906				0.230016	0.0956773				1	-0.0832254	0.153539	0.121326	0.0565358	0.0780871	0.49586	0.0946761	-0.0757987	0.0360947		0.550832	0.0441997	0.0267379	-0.0680064	-0.124458	0.488391	1.77733	2.09179	2.31326												1	-0.142138	-0.446999	-0.31478	-0.771995	-0.0731554	0.646321	0.184535
Q4/1993	2.71273	4.08416				0.0988197	0.262085				1	0.230016	-0.0832254	0.153539	0.121326	0.0793796	0.482993	0.0579484	-0.0763282	0.0682176		0.532831	0.18221	0.0848657	0.0101112	-0.0838625	0.0983632	0.472056	2.05926	2.28957												1	0.0956773	-0.142138	-0.446999	-0.31478	-0.0961404	0.629088	0.159086
Q1/1994	4.83862	5.73616				0.664069	0.775836				1	0.0988197	0.230016	-0.0832254	0.153539	0.0788084	0.485406	0.103749	-0.113751	0.0988343		0.574238	0.175282	0.197541	0.136204	0.0168176	3.3794	5.92579	2.04145	2.3214												1	0.262085	0.0956773	-0.142138	-0.446999	-0.111705	0.609771	0.135439
Q2/1994	4.6162	0.567086				0.604931	-0.831676				1	0.664069	0.0988197	0.230016	-0.0832254	0.0783013	0.476051	0.0526021	-0.149459	0.0811239		0.460318	0.3585	0.139754	0.162115	0.147306	0.858995	2.96225	2.03818	2.34081												1	0.775836	0.262085	0.0956773	-0.142138	-0.114383	0.613265	0.109146
Q3/1994	4.51703	-3.49805				0.578563	-2.09588				1	0.604931	0.664069	0.0988197	0.230016	0.0787923	0.454317	0.0378274	-0.147597	0.0566218		0.401169	0.377181	0.287787	0.176323	0.170911	0.573642	2.35061	2.00739	2.34257												1	-0.831676	0.775836	0.262085	0.0956773	-0.130432	0.621294	0.113428
Q4/1994	2.271	-7.21763				-0.0186304	-3.25262				1	0.578563	0.604931	0.664069	0.0988197	0.0487991	0.434443	0.0278965	-0.138677	0.0532335		0.376896	0.230197	0.180616	0.142926	0.168724	0.875783	0.496513	1.89949	2.2119												1	-2.09588	-0.831676	0.775836	0.262085	-0.14339	0.645125	0.10486
Q1/1995	1.285	-11.5008				-0.280797	-4.58462				1	-0.0186304	0.578563	0.604931	0.664069	0.0557239	0.463244	0.0506066	-0.187065	0.065533		0.392318	0.0067294	0.116407	0.123432	0.16177	1.16939	2.77051	1.90902	2.2301												1	-3.25262	-2.09588	-0.831676	0.775836	-0.163438	0.615257	0.124063
Q2/1995	1.44039	-6.42918				-0.239482	-3.00742				1	-0.280797	-0.0186304	0.578563	0.604931	0.0210659	0.48938	0.0523183	-0.144409	0.0820314		0.47932	-0.151252	-0.0106876	0.0577625	0.120283	0.110111	1.83079	1.90003	2.22373												1	-4.58462	-3.25262	-2.09588	-0.831676	-0.175368	0.606192	0.126455
Q3/1995	3.91021	-1.29525				0.417216	-1.41084				1	-0.239482	-0.280797	-0.0186304	0.578563	0.040393	0.471485	0.037513	-0.151693	0.0326249		0.38993	-0.0613509	-0.0174939	0.0925136	0.076017	3.23956	1.64671	1.71707	1.93951												1	-3.00742	-4.58462	-3.25262	-2.09588	-0.199437	0.617302	0.121526
Q4/1995	1.12534	3.52543				-0.32325	0.0883297				1	0.417216	-0.239482	-0.280797	-0.0186304	0.0300855	0.450071	0.0269586	-0.187453	0.12721		0.416786	0.261673	0.0444704	0.0436129	0.0955597	4.83946	2.48104	1.73742	1.95163												1	-1.41084	-3.00742	-4.58462	-3.25262	-0.212589	0.634637	0.0852529
Q1/1996	3.59068	8.12774				0.332258	1.51958				1	-0.32325	0.417216	-0.239482	-0.280797	-0.00944177	0.41169	0.0775557	-0.179581	0.101292		0.410957	-0.0955993	0.168275	0.0862253	0.0403019	2.5894	1.20569	1.73018	1.88199												1	0.0883297	-1.41084	-3.00742	-4.58462	-0.223056	0.623768	0.0545004
Q2/1996	1.2715	6.49455				-0.284386	1.01168				1	0.332258	-0.32325	0.417216	-0.239482	0.0167806	0.399539	0.147616	-0.20929	0.0548645		0.39273	0.00135541	-0.17305	0.00420271	0.0842086	1.15491	1.92176	1.68881	1.87436												1	1.51958	0.0883297	-1.41084	-3.00742	-0.231532	0.610883	0.0500777
Q3/1996	2.7226	4.20122				0.101443	0.29849				1	-0.284386	0.332258	-0.32325	0.417216	0.00924995	0.449351	0.157468	-0.192322	0.0418499		0.456347	0.0134096	0.156912	0.0122108	0.0405363	0.109623	0.052473	1.66369	1.86521												1	1.01168	1.51958	0.0883297	-1.41084	-0.252239	0.625908	0.0457079
Q4/1996	3.79057	2.20596				0.385404	-0.322009				1	0.101443	-0.284386	0.332258	-0.32325	0.0187275	0.42737	0.14246	-0.142507	0.0410834		0.468406	-0.0390616	-0.106935	-0.0076	-0.0334106	2.5485	2.4811	1.6873	1.88583												1	0.29849	1.01168	1.51958	0.0883297	-0.277374	0.612652	0.0457733
Q1/1997	7.63725	-0.606315				1.40819	-1.19659				1	0.385404	0.101443	-0.284386	0.332258	0.0554704	0.431144	0.149875	-0.224349	-0.00486176		0.351808	0.299025	0.0706628	0.031909	0.0548524	17.4019	25.9069	1.79182	2.05679												1	-0.322009	0.29849	1.01168	1.51958	-0.272814	0.612823	0.0751421
Q2/1997	3.51999	0.440627				0.313462	-0.871003				1	1.40819	0.385404	0.101443	-0.284386	0.0277955	0.387628	0.130711	-0.241643	0.0216067		0.298303	0.59337	0.22078	0.017222	-0.00773108	1.10824	1.45926	1.80145	2.06481												1	-1.19659	-0.322009	0.29849	1.01168	-0.295192	0.631346	0.0527053
Q3/1997	1.95765	1.83912				-0.101946	-0.436092				1	0.313462	1.40819	0.385404	0.101443	0.040281	0.387993	0.176004	-0.193963	0.0660791		0.436113	0.341698	0.350931	0.108517	0.0458885	2.78401	0.309138	1.77427	2.00207												1	-0.871003	-1.19659	-0.322009	0.29849	-0.307752	0.65542	0.0293135
Q4/1997	4.1273	-1.6977				0.474939	-1.536				1	-0.101946	0.313462	1.40819	0.385404	0.0448954	0.375813	0.0965522	-0.180819	0.0355547		0.327101	-0.204077	-0.0196427	-0.0905675	0.0663862	6.52169	2.361	1.81176	1.9737												1	-0.436092	-0.871003	-1.19659	-0.322009	-0.297244	0.666148	0.00381716
Q1/1998	3.02732	-0.909935				0.182466	-1.29101				1	0.474939	-0.101946	0.313462	1.40819	0.0717578	0.347285	0.0520192	-0.158682	0.0254724		0.266094	0.217523	-0.0482541	0.125052	-0.0743982	0.0173842	0.93327	1.78525	1.98107												1	-1.536	-0.436092	-0.871003	-1.19659	-0.283404	0.678328	-7.5403e-06
Q2/1998	3.61064	-1.30258				0.337565	-1.41312				1	0.182466	0.474939	-0.101946	0.313462	0.0291888	0.35268	0.0524871	-0.182696	-0.0104861		0.211985	0.133807	0.196168	0.0366356	0.0397794	0.587258	1.25432	1.79036	1.98722												1	-1.29101	-1.536	-0.436092	-0.871003	-0.290726	0.692854	0.0118631
Q3/1998	2.97081	-0.74867				0.167441	-1.24086				1	0.337565	0.182466	0.474939	-0.101946	0.0214816	0.332709	0.0703137	-0.222447	-0.00897065		0.171605	0.0418882	0.000256635	0.0732382	0.0872806	0.222972	0.0908899	1.39982	1.71481												1	-1.41312	-1.29101	-1.536	-0.436092	-0.308532	0.670834	0.0161128
Q4/1998	3.87302	-0.211347				0.407328	-1.07376				1	0.167441	0.337565	0.182466	0.474939	0.0546358	0.344416	0.0410104	-0.27896	0.00749718		0.113963	0.0788087	0.0143041	-0.00201352	0.0849777	1.52659	1.4698	1.40978	1.66407												1	-1.24086	-1.41312	-1.29101	-1.536	-0.269948	0.686881	0.00883785
Q1/1999	2.25362	-0.579756				-0.0232514	-1.18833				1	0.407328	0.167441	0.337565	0.182466	0.0655969	0.276878	-0.00705629	-0.294282	-0.0326602		-0.0571206	0.0718969	-0.00415359	-0.0475411	0.00213281	0.128057	0.00911437	1.40362	1.56536												1	-1.07376	-1.24086	-1.41312	-1.29101	-0.243672	0.693212	0.0139673
Q2/1999	0.247993	0.00441605				-0.556526	-1.00666				1	-0.0232514	0.407328	0.167441	0.337565	0.105105	0.288992	-0.0387758	-0.350934	-0.0528856		-0.153604	0.00597776	0.0223296	0.0122588	-0.00567605	4.4756	4.29207	1.438	1.5411												1	-1.18833	-1.07376	-1.24086	-1.41312	-0.231705	0.723878	0.0207982
Q3/1999	7.0759	1.92282				1.25894	-0.41006				1	-0.556526	-0.0232514	0.407328	0.167441	0.131222	0.318434	-0.0380812	-0.330907	-0.0560975		-0.106651	-0.18929	-0.0440668	-0.0540659	0.0379584	29.667	21.087	1.72997	1.72864												1	-1.00666	-1.18833	-1.07376	-1.24086	-0.212726	0.71596	-0.000621817
Q4/1999	5.46166	4.71511				0.82973	0.458303				1	1.25894	-0.556526	-0.0232514	0.407328	0.169918	0.28273	-0.0220934	-0.327936	-0.113557		-0.180856	0.499523	0.0769829	0.0787558	0.0160083	1.54231	9.36596	1.74143	1.81132												1	-0.41006	-1.00666	-1.18833	-1.07376	-0.191764	0.688288	0.00942938
Q1/2000	3.36157	7.97176				0.271339	1.47108				1	0.82973	1.25894	-0.556526	-0.0232514	0.20099	0.298172	-0.0368087	-0.284024	-0.122352		-0.145012	0.562964	0.468479	0.348407	0.128705	1.20296	0.287771	1.74299	1.80919												1	0.458303	-0.41006	-1.00666	-1.18833	-0.20741	0.67507	-0.0199661
Q2/2000	2.43792	6.20924				0.0257507	0.922956				1	0.271339	0.82973	1.25894	-0.556526	0.199712	0.286718	0.00692431	-0.324441	-0.14184		-0.172639	-0.0462571	0.0488339	-0.0583177	0.333092	0.0733431	1.33611	1.72544	1.81471												1	1.47108	0.458303	-0.41006	-1.00666	-0.245294	0.684131	-0.0400735
Q3/2000	1.12111	4.70782				-0.324373	0.456035				1	0.0257507	0.271339	0.82973	1.25894	0.182828	0.252283	0.0233321	-0.329657	-0.146698		-0.200741	-0.262555	-0.259438	-0.194867	-0.163693	0.0540549	0.365197	1.68012	1.79607												1	0.922956	1.47108	0.458303	-0.41006	-0.260544	0.685354	-0.04209
Q4/2000	0.664944	2.83555				-0.445663	-0.126216				1	-0.324373	0.0257507	0.271339	0.82973	0.153713	0.245262	0.0274631	-0.380008	-0.157977		-0.26526	-0.159325	-0.0939785	-0.080716	-0.120325	1.15973	1.49717	1.68447	1.79664												1	0.456035	0.922956	1.47108	0.458303	-0.291954	0.698473	-0.0881547
Q1/2001	5.24736	0.470604				0.772748	-0.861681				1	-0.445663	-0.324373	0.0257507	0.271339	0.187015	0.290692	-0.00979727	-0.36636	-0.15503		-0.240495	0.00914275	0.0530773	0.104699	0.151294	8.2478	5.46284	1.75848	1.82555												1	-0.126216	0.456035	0.922956	1.47108	-0.282724	0.695112	-0.078971
Q2/2001	3.13521	2.42864				0.211151	-0.252757				1	0.772748	-0.445663	-0.324373	0.0257507	0.19484	0.281629	-0.00312213	-0.345123	-0.121891		-0.188507	0.52267	0.308885	0.281551	0.289824	1.37268	0.0875485	1.76891	1.8196												1	-0.861681	-0.126216	0.456035	0.922956	-0.268984	0.659178	-0.0909501
Q3/2001	2.96919	1.09019				0.167009	-0.668999				1	0.211151	0.772748	-0.445663	-0.324373	0.214647	0.269277	-0.0231487	-0.312787	-0.162637		-0.229296	0.44577	0.532973	0.490277	0.336013	1.09918	0.404012	1.77429	1.80777												1	-0.252757	-0.861681	-0.126216	0.456035	-0.268173	0.650476	-0.119871
Q4/2001	1.77825	2.26705				-0.149648	-0.303011				1	0.167009	0.211151	0.772748	-0.445663	0.191893	0.304775	0.0179084	-0.312833	-0.113547		-0.103697	0.0554366	0.160571	0.130938	0.392251	0.59493	4.15371	1.77866	1.83931												1	-0.668999	-0.252757	-0.861681	-0.126216	-0.260369	0.661548	-0.107858
Q1/2002	1.89528	3.71984				-0.118531	0.148786				1	-0.149648	0.167009	0.211151	0.772748	0.162116	0.344253	0.102144	-0.314091	-0.133522		-0.00121689	-0.0418413	0.0579811	0.0558439	-0.0445243	0.0831899	0.0774709	1.74947	1.78894												1	-0.303011	-0.668999	-0.252757	-0.861681	-0.252911	0.672316	-0.119917
Q2/2002	2.62938	3.45013				0.076657	0.0649094				1	-0.118531	-0.149648	0.167009	0.211151	0.168069	0.335259	0.0992244	-0.300522	-0.115718		0.0182436	0.0388579	0.0517774	0.134335	0.0521957	0.0202099	0.00846372	1.74196	1.76295												1	0.148786	-0.303011	-0.668999	-0.252757	-0.241495	0.702828	-0.115136
Q3/2002	3.02048	2.51825				0.180646	-0.224891				1	0.076657	-0.118531	-0.149648	0.167009	0.179481	0.348292	0.0709581	-0.287119	-0.159107		-0.0269755	0.214163	0.194982	0.200371	0.197567	0.0158901	0.00404996	1.73695	1.74203												1	0.0649094	0.148786	-0.303011	-0.668999	-0.259818	0.676593	-0.124941
Q4/2002	3.57112	1.87078				0.327056	-0.426247				1	0.180646	0.076657	-0.118531	-0.149648	0.142451	0.386987	0.111084	-0.260229	-0.154297		0.0835443	0.274809	0.317354	0.290232	0.269506	0.0386122	0.0468481	1.7294	1.73799												1	-0.224891	0.0649094	0.148786	-0.303011	-0.258809	0.679179	-0.10824
Q1/2003	2.62075	-0.335097				0.0743634	-1.11224				1	0.327056	0.180646	0.076657	-0.118531	0.161874	0.419129	0.0676604	-0.201874	-0.0890483		0.195867	0.306256	0.267206	0.302059	0.286757	0.760629	0.638092	1.7257	1.71872												1	-0.426247	-0.224891	0.0649094	0.148786	-0.268216	0.665164	-0.124219
Q2/2003	3.76871	-0.293897				0.379592	-1.09943				1	0.0743634	0.327056	0.180646	0.076657	0.112313	0.455544	0.0999365	-0.170492	-0.105992		0.278997	0.13995	0.26907	0.217546	0.233517	0.812317	0.301822	1.73205	1.70476												1	-1.11224	-0.426247	-0.224891	0.0649094	-0.23589	0.648039	-0.12676
Q3/2003	4.0697	3.4322				0.459623	0.0593348				1	0.379592	0.0743634	0.327056	0.180646	0.124094	0.45517	0.0662013	-0.245044	-0.17695		0.0993779	0.189688	0.108591	0.21326	0.156934	1.03067	1.29597	1.71201	1.70154												1	-1.09943	-1.11224	-0.426247	-0.224891	-0.213016	0.664258	-0.151712
Q4/2003	3.21861	3.57231				0.233327	0.102908				1	0.459623	0.379592	0.0743634	0.327056	0.0638252	0.486287	0.0580264	-0.199934	-0.162774		0.181605	0.241256	0.159469	0.128423	0.178514	0.000889279	0.0424973	1.66726	1.679												1	0.0593348	-1.09943	-1.11224	-0.426247	-0.21932	0.661657	-0.178892
Q1/2004	2.18314	6.8828				-0.0419916	1.13242				1	0.233327	0.459623	0.379592	0.0743634	0.0254517	0.500201	0.0468141	-0.249834	-0.132373		0.164809	0.0590003	0.119817	0.103062	0.149926	0.14427	0.520989	1.64419	1.67262												1	0.102908	0.0593348	-1.09943	-1.11224	-0.210401	0.648752	-0.151667
Q2/2004	1.52964	5.27649				-0.215751	0.632884				1	-0.0419916	0.233327	0.459623	0.379592	0.0455495	0.491155	0.0926657	-0.27196	-0.122543		0.189318	-0.124969	-0.09919	-0.0175918	0.0679117	0.116574	1.13816	1.63429	1.66528												1	1.13242	0.102908	0.0593348	-1.09943	-0.216737	0.665266	-0.152755
Q3/2004	0.659008	0.0381875				-0.447241	-0.996157				1	-0.215751	-0.0419916	0.233327	0.459623	0.00757081	0.502307	0.0648868	-0.25026	-0.146905		0.170029	-0.22944	-0.1395	-0.140536	-0.0608267	0.670998	2.11207	1.63965	1.68449												1	0.632884	1.13242	0.102908	0.0593348	-0.230661	0.660901	-0.140611
Q4/2004	1.00715	-2.07633				-0.354673	-1.65374				1	-0.447241	-0.215751	-0.0419916	0.233327	-0.0194965	0.490465	0.0531557	-0.223515	-0.129436		0.19067	-0.271136	-0.145446	-0.0517193	-0.0951141	0.0987098	0.952958	1.61614	1.67026												1	-0.996157	0.632884	1.13242	0.102908	-0.236538	0.647692	-0.162035
Q1/2005	3.77393	-3.57406				0.380981	-2.11952				1	-0.354673	-0.447241	-0.215751	-0.0419916	-0.0878901	0.468473	-0.00277856	-0.222744	-0.174108		0.0688416	-0.197434	-0.122594	-0.0202128	0.0463528	4.73238	1.5839	1.48861	1.42467												1	-1.65374	-0.996157	0.632884	1.13242	-0.225531	0.662272	-0.133441
Q2/2005	4.41194	0.152138				0.550619	-0.96072				1	0.380981	-0.354673	-0.447241	-0.215751	-0.0813219	0.432377	0.0591669	-0.263856	-0.169863		0.0578259	0.217076	-0.0422124	0.0338538	0.0770948	1.57364	3.17165	1.49349	1.44332												1	-2.11952	-1.65374	-0.996157	0.632884	-0.228789	0.671017	-0.153297
Q3/2005	4.6526	2.71424				0.61461	-0.163939				1	0.550619	0.380981	-0.354673	-0.447241	-0.0516265	0.514253	0.0495088	-0.254024	-0.219461		0.0902774	0.43864	0.204631	0.0497529	0.109083	0.438003	3.61485	1.46874	1.47868												1	-0.96072	-2.11952	-1.65374	-0.996157	-0.201699	0.662846	-0.15876
Q4/2005	5.94832	5.01978				0.959125	0.553052				1	0.61461	0.550619	0.380981	-0.354673	-0.0924694	0.585177	0.0832431	-0.225135	-0.176996		0.266289	0.290025	0.182265	-0.0202789	0.0412638	6.33261	11.9167	1.46673	1.57642												1	-0.163939	-0.96072	-2.11952	-1.65374	-0.211359	0.707872	-0.179383
Q1/2006	1.06384	7.02693				-0.339602	1.17725				1	0.959125	0.61461	0.550619	0.380981	-0.121919	0.55537	0.110336	-0.245365	-0.179347		0.240994	0.275133	-0.0629872	-0.159661	-0.199974	5.34536	0.275771	1.52243	1.56989												1	0.553052	-0.163939	-0.96072	-2.11952	-0.217154	0.688849	-0.185729
Q2/2006	0.89031	5.65021				-0.385741	0.749107				1	-0.339602	0.959125	0.61461	0.550619	-0.111975	0.532256	0.136641	-0.275225	-0.180678		0.212993	-0.430316	-0.112849	-0.341013	-0.356973	0.0281051	0.011706	1.51668	1.55747												1	1.17725	0.553052	-0.163939	-0.96072	-0.224038	0.682528	-0.163814
Q3/2006	0.256487	3.02554				-0.554267	-0.0671295				1	-0.385741	-0.339602	0.959125	0.61461	-0.114139	0.534909	0.194192	-0.282564	-0.183542		0.262995	-0.770244	-0.762439	-0.499799	-0.471343	0.659805	0.0972652	1.52117	1.55754												1	0.749107	1.17725	0.553052	-0.163939	-0.252029	0.66469	-0.187498
Q4/2006	1.4082	-1.49889				-0.24804	-1.47417				1	-0.554267	-0.385741	-0.339602	0.959125	-0.123457	0.571621	0.234092	-0.256411	-0.220279		0.329024	-0.654784	-0.681137	-0.656413	-0.651468	2.34015	2.30215	1.52951	1.56587												1	-0.0671295	0.749107	1.17725	0.553052	-0.242314	0.662065	-0.199876
Q1/2007	3.96019	-0.957468				0.430505	-1.30579				1	-0.24804	-0.554267	-0.385741	-0.339602	-0.0771963	0.562262	0.229118	-0.309279	-0.216095		0.266006	-0.150964	-0.45378	-0.456733	-0.385743	4.7825	9.42421	1.57634	1.65715												1	-1.47417	-0.0671295	0.749107	1.17725	-0.255057	0.690133	-0.208687
Q2/2007	2.87603	0.170989				0.142238	-0.954857				1	0.430505	-0.24804	-0.554267	-0.385741	-0.0914666	0.542161	0.266335	-0.258015	-0.163774		0.386707	0.282059	0.035872	-0.309037	-0.202279	0.27653	1.67889	1.53415	1.63233												1	-1.30579	-1.47417	-0.0671295	0.749107	-0.259305	0.71031	-0.214699
Q3/2007	3.37346	1.81595				0.2745	-0.443298				1	0.142238	0.430505	-0.24804	-0.554267	-0.156396	0.564685	0.258411	-0.288893	-0.126704		0.407499	0.177056	0.330885	0.104872	-0.116348	0.134311	2.16082	1.19613	1.43981												1	-0.954857	-1.30579	-1.47417	-0.0671295	-0.274018	0.693302	-0.207718
Q4/2007	3.31448	3.21597				0.258818	-0.0079105				1	0.2745	0.142238	0.430505	-0.24804	-0.182746	0.560689	0.261242	-0.278025	-0.12194		0.421966	-0.0811239	-0.112601	0.0925943	0.0902786	1.6346	0.401795	1.19734	1.339												1	-0.443298	-0.954857	-1.30579	-1.47417	-0.268405	0.68098	-0.198457
Q1/2008	1.42151	6.67135				-0.2445	1.06667				1	0.258818	0.2745	0.142238	0.430505	-0.196375	0.5837	0.250918	-0.279082	-0.0601195		0.495417	-0.0420039	-0.248562	-0.269865	-0.09642	0.580009	0.310166	1.18918	1.33926												1	-0.0079105	-0.443298	-0.954857	-1.30579	-0.285449	0.668846	-0.212014
Q2/2008	-2.97162	4.71256				-1.41258	0.457511				1	-0.2445	0.258818	0.2745	0.142238	-0.203247	0.648035	0.254726	-0.266851	-0.120396		0.515513	-0.386139	-0.24111	-0.436968	-0.407054	14.9029	14.3018	1.37024	1.48283												1	1.06667	-0.0079105	-0.443298	-0.954857	-0.290115	0.665543	-0.222396
Q3/2008	-6.64234	4.52256				-2.38859	0.398423				1	-1.41258	-0.2445	0.258818	0.2745	-0.190247	0.613788	0.254931	-0.245192	-0.0993616		0.524166	-1.21034	-0.617874	-0.436385	-0.503603	19.6369	50.2593	1.57783	1.93855												1	0.457511	1.06667	-0.0079105	-0.443298	-0.300208	0.672545	-0.222458
Q4/2008	-8.78175	0.807609				-2.95743	-0.756877				1	-2.38859	-1.41258	-0.2445	0.258818	-0.249317	0.593874	0.210235	-0.250104	-0.113199		0.440806	-1.93296	-1.25902	-0.667926	-0.51543	14.8458	84.3515	1.70799	2.51936												1	0.398423	0.457511	1.06667	-0.0079105	-0.308527	0.633446	-0.214579
Q1/2009	-6.70611	-1.9604				-2.40554	-1.61769				1	-2.95743	-2.38859	-1.41258	-0.2445	-0.245058	0.547632	0.240988	-0.243312	-0.132856		0.412451	-2.06408	-1.51844	-0.900922	-0.660996	1.64924	43.0492	1.64652	2.74258												1	-0.756877	0.398423	0.457511	1.06667	-0.282557	0.62955	-0.225505
Q2/2009	-0.758964	-2.17583				-0.824264	-1.68469				1	-2.40554	-2.95743	-2.38859	-1.41258	-0.256845	0.502761	0.207744	-0.264222	-0.127272		0.31901	-1.26975	-1.31928	-0.800159	-0.627063	2.80711	0.550072	1.66007	2.74522												1	-1.61769	-0.756877	0.398423	0.457511	-0.318021	0.657	-0.233452
Q3/2009	0.568659	1.26737				-0.471264	-0.613897				1	-0.824264	-2.40554	-2.95743	-2.38859	-0.271541	0.520219	0.235188	-0.251742	-0.108967		0.394699	-0.261309	-0.30954	-0.428035	-0.289914	0.623528	0.465197	1.65559	2.74556												1	-1.68469	-1.61769	-0.756877	0.398423	-0.334259	0.645751	-0.227638
Q4/2009	1.38232	2.21159				-0.254922	-0.320257				1	-0.471264	-0.824264	-2.40554	-2.95743	-0.298915	0.541617	0.196071	-0.244527	-0.0703531		0.422807	0.0805104	0.326501	0.335745	0.0977354	1.59151	1.75916	1.66497	2.7319												1	-0.613897	-1.68469	-1.61769	-0.756877	-0.31197	0.660945	-0.221644
Q1/2010	1.7999	4.42875				-0.143892	0.369249				1	-0.254922	-0.471264	-0.824264	-2.40554	-0.262583	0.594405	0.223084	-0.269382	-0.04887		0.499237	-0.17964	0.0230812	0.30648	0.489303	0.0180766	5.6712	1.66436	2.76371												1	-0.320257	-0.613897	-1.68469	-1.61769	-0.324935	0.667959	-0.233064
Q2/2010	3.4206	3.87884				0.287035	0.198233				1	-0.143892	-0.254922	-0.471264	-0.824264	-0.247083	0.517513	0.200917	-0.282895	-0.0102993		0.425236	-0.230959	-0.258998	-0.0974021	0.120284	3.79533	0.39331	1.69943	2.76589												1	0.369249	-0.320257	-0.613897	-1.68469	-0.345137	0.680242	-0.22775
Q3/2010	2.30624	2.42434				-0.0092623	-0.254095				1	0.287035	-0.143892	-0.254922	-0.471264	-0.211602	0.505462	0.228247	-0.210289	0.0310151		0.554434	-0.0603683	-0.318548	-0.364905	-0.333677	0.0369441	1.48868	1.69962	2.77426												1	0.198233	0.369249	-0.320257	-0.613897	-0.352331	0.693648	-0.237124
Q4/2010	0.52072	2.25074				-0.484011	-0.308082				1	-0.0092623	0.287035	-0.143892	-0.254922	-0.224709	0.477488	0.213242	-0.177071	0.0250399		0.538699	-0.148828	-0.154248	-0.415007	-0.476413	1.58914	0.000816584	1.71382	2.774												1	-0.254095	0.198233	0.369249	-0.320257	-0.394773	0.702332	-0.231502
Q1/2011	2.98717	-0.284568				0.17179	-1.09653				1	-0.484011	-0.0092623	0.287035	-0.143892	-0.248402	0.448874	0.198573	-0.117242	-0.015646		0.514559	-0.498903	-0.352177	-0.36817	-0.459037	6.36279	5.62887	1.76415	2.80197												1	-0.308082	-0.254095	0.198233	0.369249	-0.39063	0.697971	-0.243743
Q2/2011	0.590251	1.16515				-0.465523	-0.645688				1	0.17179	-0.484011	-0.0092623	0.287035	-0.20394	0.40111	0.144517	-0.111576	-0.0134949		0.420556	-0.207821	-0.571863	-0.415779	-0.411307	0.939369	0.0415772	1.76528	2.80052												1	-1.09653	-0.308082	-0.254095	0.198233	-0.394251	0.699433	-0.244951
Q3/2011	1.07521	0.814274				-0.336577	-0.754804				1	-0.465523	0.17179	-0.484011	-0.0092623	-0.177579	0.29736	0.192505	-0.100683	0.00721496		0.396397	-0.234271	-0.208344	-0.547274	-0.472217	0.148047	0.260239	1.75745	2.79473												1	-0.645688	-1.09653	-0.308082	-0.254095	-0.375003	0.677728	-0.235484
Q4/2011	0.663349	0.879018				-0.446087	-0.73467				1	-0.336577	-0.465523	0.17179	-0.484011	-0.137869	0.271053	0.150267	-0.108864	-0.00230683		0.310149	-0.316637	-0.357646	-0.330178	-0.54155	0.237031	0.128906	1.75955	2.79522												1	-0.754804	-0.645688	-1.09653	-0.308082	-0.372297	0.66844	-0.226723
Q1/2012	2.58259	2.81644				0.0642168	-0.132158				1	-0.446087	-0.336577	-0.465523	0.17179	-0.176791	0.250243	0.127442	-0.0652515	0.00670518		0.319138	-0.299787	-0.223988	-0.280917	-0.345618	1.87419	2.37584	1.77484	2.80557												1	-0.73467	-0.754804	-0.645688	-1.09653	-0.38138	0.68166	-0.223967
Q2/2012	-0.215399	2.66287				-0.679736	-0.179917				1	0.0642168	-0.446087	-0.336577	-0.465523	-0.121676	0.247474	0.117181	-0.0390888	0.0246279		0.350194	-0.156365	-0.28982	-0.208447	-0.309733	3.87454	1.93648	1.80762	2.81001												1	-0.132158	-0.73467	-0.754804	-0.645688	-0.41155	0.706379	-0.211904
Q3/2012	4.73517	3.76161				0.636564	0.161776				1	-0.679736	0.0642168	-0.446087	-0.336577	-0.127655	0.19174	0.107875	-0.0209008	0.0286251		0.307338	-0.251371	-0.1437	-0.260671	-0.19278	11.1523	9.72904	1.89606	2.85205												1	-0.179917	-0.132158	-0.73467	-0.754804	-0.400781	0.706596	-0.178286
Q4/2012	-0.916348	2.52023				-0.86611	-0.224274				1	0.636564	-0.679736	0.0642168	-0.446087	-0.144254	0.170464	0.100795	-0.0247197	-0.0320249		0.214514	-0.0915587	-0.26329	-0.189057	-0.262387	8.48597	5.15557	1.96396	2.87498												1	0.161776	-0.179917	-0.132158	-0.73467	-0.404333	0.726548	-0.197733
Q1/2013	2.57828	2.63606				0.0630699	-0.188254				1	-0.86611	0.636564	-0.679736	0.0642168	-0.0950951	0.16979	0.0571344	-0.0242565	0.00932072		0.211988	-0.188695	-0.080953	-0.189209	-0.177608	0.896587	0.819358	1.9332	2.87082												1	-0.224274	0.161776	-0.179917	-0.132158	-0.41659	0.707814	-0.18368
Q2/2013	2.18743	2.66665				-0.0408526	-0.178742				1	0.0630699	-0.86611	0.636564	-0.679736	-0.101111	0.134397	0.0650187	-0.0400502	-0.0223799		0.136985	-0.15923	-0.198395	-0.16125	-0.20654	0.198216	0.388311	1.92206	2.85563												1	-0.188254	-0.224274	0.161776	-0.179917	-0.403706	0.725916	-0.173653
Q3/2013	3.56991	2.85435				0.326733	-0.120369				1	-0.0408526	0.0630699	-0.86611	0.636564	-0.121498	0.0838125	0.0473488	-0.0304632	-0.0391656		0.0615326	-0.120482	-0.0979689	-0.112619	-0.198024	2.82901	3.89508	1.9414	2.85717												1	-0.178742	-0.188254	-0.224274	0.161776	-0.42555	0.687646	-0.172317
Q4/2013	1.86718	2.23219				-0.126003	-0.313852				1	0.326733	-0.0408526	0.0630699	-0.86611	-0.167645	0.0822487	0.0715804	-0.0953219	-0.00448576		0.0540214	-0.145823	-0.10153	-0.107773	-0.129048	0.00555615	0.000131082	1.88979	2.79124												1	-0.120369	-0.178742	-0.188254	-0.224274	-0.410424	0.686041	-0.16515
Q1/2014	3.33877	0.214946				0.265276	-0.941187				1	-0.126003	0.326733	-0.0408526	0.0630699	-0.127664	0.0863444	0.041346	-0.102428	-0.0382113		-0.0129494	-0.12326	-0.15264	-0.136938	-0.117	2.13532	2.06707	1.86306	2.80125												1	-0.313852	-0.120369	-0.178742	-0.188254	-0.432692	0.681782	-0.16405
Q2/2014	3.31537	0.768035				0.259056	-0.769184				1	0.265276	-0.126003	0.326733	-0.0408526	-0.114758	0.0716284	0.0028495	-0.0931584	-0.0623515		-0.081032	-0.124006	-0.175422	-0.221599	-0.132512	2.07558	2.16878	1.88015	2.81325												1	-0.941187	-0.313852	-0.120369	-0.178742	-0.443328	0.685558	-0.144437
Q3/2014	2.79355	0.975379				0.120308	-0.704703				1	0.259056	0.265276	-0.126003	0.326733	-0.161196	0.0638781	0.0188037	-0.0942895	-0.0555323		-0.06714	-0.145923	-0.131518	-0.147485	-0.184363	1.00257	1.31299	1.883	2.82												1	-0.769184	-0.941187	-0.313852	-0.120369	-0.448839	0.66549	-0.130637
Q4/2014	2.65359	-0.294163				0.0830954	-1.09951				1	0.120308	0.259056	0.265276	-0.126003	-0.155234	0.113692	0.00220349	-0.127099	-0.0666184		-0.0778227	-0.166307	-0.183661	-0.141388	-0.130211	0.87984	0.643589	1.87084	2.81079												1	-0.704703	-0.769184	-0.941187	-0.313852	-0.478803	0.656006	-0.142042
Q1/2015	1.77073	-1.15988				-0.151649	-1.36874				1	0.0830954	0.120308	0.259056	0.265276	-0.11743	0.146947	0.0314617	-0.141527	-0.0826467		-0.045765	-0.160022	-0.224475	-0.214829	-0.130248	0.000991847	0.00647813	1.83047	2.75794												1	-1.09951	-0.704703	-0.769184	-0.941187	-0.493675	0.663025	-0.127663
Q2/2015	2.26981	2.69346				-0.0189478	-0.170403				1	-0.151649	0.0830954	0.120308	0.259056	-0.0693391	0.137693	0.00312828	-0.135543	-0.079513		-0.0742347	-0.126865	-0.176768	-0.21367	-0.178999	0.164734	0.362342	1.82952	2.75047												1	-1.36874	-1.09951	-0.704703	-0.769184	-0.476794	0.663768	-0.0968325
Q3/2015	1.72738	1.30899				-0.163174	-0.600955				1	-0.0189478	-0.151649	0.0830954	0.120308	-0.0857288	0.226852	-0.000892657	-0.150767	-0.112825		-0.0376322	-0.115993	-0.108111	-0.170144	-0.166898	0.0314866	0.000196183	1.82864	2.73817												1	-0.170403	-1.36874	-1.09951	-0.704703	-0.465929	0.66059	-0.0710707
Q4/2015	2.96165	1.3378				0.165005	-0.591995				1	-0.163174	-0.0189478	-0.151649	0.0830954	-0.104203	0.20738	0.0204118	-0.161815	-0.0856704		-0.0196933	-0.121008	-0.0985368	-0.0706744	-0.132214	1.15711	1.24955	1.82455	2.74301												1	-0.600955	-0.170403	-1.36874	-1.09951	-0.475732	0.641667	-0.0835707
Q1/2016	1.29504	1.41216				-0.278129	-0.56887				1	0.165005	-0.163174	-0.0189478	-0.151649	-0.0910926	0.180238	0.0714209	-0.170831	-0.116158		-0.0353306	-0.0521544	-0.11657	-0.0880121	-0.050155	0.722303	0.735141	1.82577	2.74543												1	-0.591995	-0.600955	-0.170403	-1.36874	-0.465957	0.663384	-0.0772107
Q2/2016	0.625153	2.33871				-0.456243	-0.280725				1	-0.278129	0.165005	-0.163174	-0.0189478	-0.138547	0.190541	0.0565814	-0.129068	-0.106201		0.0118535	-0.159133	-0.0586319	-0.10282	-0.0859808	1.24863	1.93919	1.70492	2.67414												1	-0.56887	-0.591995	-0.600955	-0.170403	-0.461619	0.686347	-0.0808555
Q3/2016	1.88261	-0.106994				-0.1219	-1.04131				1	-0.456243	-0.278129	0.165005	-0.163174	-0.123135	0.215555	0.0988227	-0.0898353	-0.106701		0.117842	-0.246378	-0.188573	-0.114619	-0.0943446	0.219175	0.01074	1.51655	2.36237												1	-0.280725	-0.56887	-0.591995	-0.600955	-0.462724	0.667516	-0.0864209
Q4/2016	2.95487	1.14711				0.163202	-0.651297				1	-0.1219	-0.456243	-0.278129	0.165005	-0.137826	0.201457	0.0738752	-0.106553	-0.126442		0.0423366	-0.187317	-0.213951	-0.165108	-0.126196	1.7379	1.18466	1.37489	1.72679												1	-1.04131	-0.280725	-0.56887	-0.591995	-0.434968	0.671626	-0.101728
Q1/2017	1.56561	0.0138883				-0.206187	-1.00371				1	0.163202	-0.1219	-0.456243	-0.278129	-0.15507	0.210947	0.0574281	-0.123834	-0.146161		-0.00161968	-0.030494	-0.100787	-0.122938	-0.1306	0.436625	0.0808146	1.36104	1.28025												1	-0.651297	-1.04131	-0.280725	-0.56887	-0.436199	0.674114	-0.11286
Q2/2017	0.849789	-1.10898				-0.396515	-1.35291				1	-0.206187	0.163202	-0.1219	-0.456243	-0.184718	0.219768	0.0477729	-0.147391	-0.144803		-0.0246533	-0.138203	-0.0703503	-0.101291	-0.099963	0.943822	1.24395	1.33947	1.28869												1	-1.00371	-0.651297	-1.04131	-0.280725	-0.434687	0.64981	-0.104487
Q3/2017	1.40301	-0.309964				-0.249421	-1.10443				1	-0.396515	-0.206187	0.163202	-0.1219	-0.172114	0.193864	0.107442	-0.133836	-0.0961933		0.071276	-0.281253	-0.231344	-0.174055	-0.130305	0.0143334	0.200695	1.33235	1.28548												1	-1.35291	-1.00371	-0.651297	-1.04131	-0.445294	0.659413	-0.0934651
Q4/2017	1.41957	2.59673				-0.245016	-0.200486				1	-0.249421	-0.396515	-0.206187	0.163202	-0.195511	0.198448	0.0539515	-0.123477	-0.0450455		0.0838772	-0.248293	-0.257345	-0.235405	-0.215904	0.000151954	0.0119874	1.31355	1.26407												1	-1.10443	-1.35291	-1.00371	-0.651297	-0.452302	0.636756	-0.0969894
[truncated: 12 more columns]

## Sheet: Forecast&Persistence_FR
Q1/1960 !Q mag=bil	Quarterly Real GDP Growth (Annualized)	Quarterly GDP Deflator Growth (Annualized)				Standardized Series										Coefficients AR(4) on Real GDP Growth																															Coefficients AR(4) on Inflation Rate (GDP Deflator)
.DESC						Real GDPGrowth	Inflation (GDP Deflator)									Matrix bm in the Gauss code																															Matrix bm in the Gauss code
.T1
.TN																							Forecast
.LSOURCE											Regressors					Time-Varying Coefficients Estimated						Persistence	One-period ahead	Two-periods ahead	Three-periods ahead	Four-periods ahead	Squared Forecasting Error	Squared Forecasting Error	RMSFE	RMSFE												Regressors					Time-Varying Coefficients Estimated
.DTLM											constant	lag1	lag2	lag3	lag4	intercept	lag1	lag2	lag3	lag4			t+1 with information up to t	t+2 with information up to t	t+3 with information up to t	t+4 with information up to t	One-period ahead	Four-period ahead	One-period ahead	Four-period ahead												constant	lag1	lag2	lag3	lag4	intercept	lag1	lag2
Q1/1960	#N/A	#N/A				#N/A	#N/A				1											#N/A							#N/A	#N/A												1
Q2/1960	1.50003	1.50473				-0.265976	-0.773526				1											#N/A							#N/A	#N/A												1
Q3/1960	2.98309	1.57908				0.0664913	-0.743975				1											#N/A							#N/A	#N/A												1
Q4/1960	4.713	1.27526				0.454294	-0.864729				1											#N/A							#N/A	#N/A												1
Q1/1961	6.38231	0.921716				0.828514	-1.00525				1											#N/A							#N/A	#N/A												1
Q2/1961	6.35064	0.684065				0.821415	-1.0997				1	0.828514	0.454294	0.0664913	-0.265976	0.851577	-0.373489	-0.111591	-0.00163535	-0.0466383		-0.533354	0.503737	#N/A	#N/A	#N/A	2.00815	#N/A	#N/A	#N/A	1											1	-1.00525	-0.864729	-0.743975	-0.773526	-0.026008	0.666558	0.0763095
Q3/1961	6.3187	1.06468				0.814255	-0.948424				1	0.821415	0.828514	0.454294	0.0664913	0.828315	-0.316597	-0.10763	0.0100907	-0.00505103		-0.419187	0.483333	0.567138	#N/A	#N/A	2.17909	#N/A	#N/A	#N/A	1											1	-1.0997	-1.00525	-0.864729	-0.743975	-0.032824	0.650793	0.065099
Q4/1961	6.739	1.26946				0.908476	-0.867035				1	0.814255	0.821415	0.828514	0.454294	0.880509	-0.315899	-0.111858	0.0430614	-0.0229285		-0.407624	0.556665	0.59295	0.561002	#N/A	2.46286	#N/A	#N/A	#N/A	1											1	-0.948424	-1.0997	-1.00525	-0.864729	-0.0517649	0.674796	0.0643212
Q1/1962	7.13707	2.2548				0.997713	-0.475403				1	0.908476	0.814255	0.821415	0.828514	0.865881	-0.298945	-0.144378	0.0643652	-0.0136788		-0.392637	0.518274	0.629953	0.592671	0.539297	4.57393	4.18159	#N/A	#N/A	1											1	-0.867035	-0.948424	-1.0997	-1.00525	-0.034738	0.675571	0.0442642
Q2/1962	6.41107	0.60334				0.834962	-1.13179				1	0.997713	0.908476	0.814255	0.821415	0.848434	-0.343981	-0.142465	0.105609	0.00578914		-0.375047	0.466562	0.620956	0.635469	0.577586	2.7006	1.31813	#N/A	#N/A	2											1	-0.475403	-0.867035	-0.948424	-1.0997	-0.0397757	0.673656	0.0436028
Q3/1962	5.71808	0.702169				0.67961	-1.09251				1	0.834962	0.997713	0.908476	0.814255	0.857446	-0.366686	-0.153286	0.0758675	-0.0109887		-0.455093	0.458318	0.646464	0.652758	0.614601	0.974437	0.0840968	#N/A	#N/A	2											1	-1.13179	-0.475403	-0.867035	-0.948424	-0.0321409	0.676293	0.0207717
Q4/1962	4.9761	0.672177				0.513277	-1.10443				1	0.67961	0.834962	0.997713	0.908476	0.833026	-0.372902	-0.163067	0.110542	-0.0247398		-0.450168	0.531256	0.62711	0.670221	0.602022	0.00643229	0.156715	#N/A	#N/A	2											1	-1.09251	-1.13179	-0.475403	-0.867035	-0.0484557	0.691245	0.000655762
Q1/1963	-6.71932	1.67766				-2.10856	-0.704794				1	0.513277	0.67961	0.834962	0.997713	0.887718	-0.34541	-0.197884	0.0860967	-0.0556708		-0.512869	0.592287	0.591712	0.609623	0.580842	145.151	143.924	#N/A	#N/A	2											1	-1.10443	-1.09251	-1.13179	-0.475403	-0.0447706	0.675397	0.0295362
Q2/1963	17.4746	0.897559				3.31514	-1.01485				1	-2.10856	0.513277	0.67961	0.834962	0.85776	-0.352718	-0.192036	0.0901251	-0.018715		-0.473344	1.54854	0.593596	0.580213	0.563375	62.1005	150.676	#N/A	#N/A	3											1	-0.704794	-1.10443	-1.09251	-1.13179	-0.030425	0.684076	0.0400448
Q3/1963	12.9822	0.481265				2.30806	-1.18031				1	3.31514	-2.10856	0.513277	0.67961	0.838692	-0.312785	-0.185641	0.0577401	0.0190592		-0.421627	0.235792	0.750021	0.571837	0.562087	85.4503	60.6592	#N/A	#N/A	3											1	-1.01485	-0.704794	-1.10443	-1.09251	-0.020307	0.662524	0.046716
Q4/1963	1.24322	2.99012				-0.323547	-0.183145				1	2.30806	3.31514	-2.10856	0.513277	0.80665	-0.341815	-0.159784	0.0854802	0.0179262		-0.398193	-0.683025	0.0375493	0.0961981	0.595156	2.57138	16.7947	#N/A	#N/A	3											1	-1.18031	-1.01485	-0.704794	-1.10443	-0.00506767	0.649982	0.0615714
Q1/1964	7.46041	1.44518				1.0702	-0.797194				1	-0.323547	2.30806	3.31514	-2.10856	0.864318	-0.397444	-0.195803	0.0869132	-0.0232368		-0.529571	0.878111	0.916907	0.934403	0.858822	0.734211	0.889067	#N/A	#N/A	3											1	-0.183145	-1.18031	-1.01485	-0.704794	-0.0182772	0.648868	0.0610445
Q2/1964	3.81741	0.957925				0.253526	-0.990856				1	1.0702	-0.323547	2.30806	3.31514	0.846093	-0.415979	-0.193405	0.104553	-0.0596971		-0.564528	0.506898	0.702237	0.859095	0.616253	1.27744	2.61807	#N/A	#N/A	4											1	-0.797194	-0.183145	-1.18031	-1.01485	-0.0241625	0.640625	0.0866171
Q3/1964	4.87519	1.74402				0.490654	-0.678417				1	0.253526	1.0702	-0.323547	2.30806	0.867394	-0.427341	-0.179104	0.0843515	-0.0606689		-0.582762	0.400056	0.25664	0.331529	0.349481	0.163325	0.396575	#N/A	#N/A	4											1	-0.990856	-0.797194	-0.183145	-1.18031	-0.0395617	0.619062	0.106911
Q4/1964	3.59872	1.9505				0.204501	-0.596352				1	0.490654	0.253526	1.0702	-0.323547	0.851074	-0.408619	-0.146809	0.0526632	-0.140101		-0.642866	0.715053	0.760929	0.772507	0.678892	5.18683	4.47811	#N/A	#N/A	4											1	-0.678417	-0.990856	-0.797194	-0.183145	-0.0377284	0.618271	0.112091
Q1/1965	0.886997	2.08647				-0.403403	-0.542309				1	0.204501	0.490654	0.253526	1.0702	0.86578	-0.437415	-0.14212	0.0962669	-0.154191		-0.637459	0.565987	0.350272	0.427024	0.464221	18.699	14.9791	#N/A	#N/A	4											1	-0.596352	-0.678417	-0.990856	-0.797194	-0.0596506	0.628092	0.100298
Q2/1965	9.83058	1.60887				1.60153	-0.732133				1	-0.403403	0.204501	0.490654	0.253526	0.84896	-0.43337	-0.232628	0.0720941	-0.172149		-0.766053	0.967939	0.597287	0.59329	0.566988	7.98814	21.2972	#N/A	#N/A	5											1	-0.542309	-0.596352	-0.678417	-0.990856	-0.0457437	0.645536	0.12335
Q3/1965	5.73872	1.57907				0.684236	-0.743978				1	1.60153	-0.403403	0.204501	0.490654	0.82627	-0.427258	-0.168715	0.0881843	-0.147966		-0.655754	0.155496	0.453604	0.468112	0.526137	5.56297	0.497374	#N/A	#N/A	5											1	-0.732133	-0.542309	-0.596352	-0.678417	-0.0317661	0.646659	0.0965718
Q4/1965	5.53045	2.63657				0.637548	-0.323666				1	0.684236	1.60153	-0.403403	0.204501	0.83545	-0.50529	-0.186399	0.0961852	-0.119178		-0.714682	0.128015	0.423797	0.362925	0.599088	5.16613	0.0294326	#N/A	#N/A	5											1	-0.743978	-0.732133	-0.542309	-0.596352	-0.0213467	0.65226	0.092527
Q1/1966	3.59264	2.61308				0.203137	-0.333004				1	0.637548	0.684236	1.60153	-0.403403	0.807938	-0.563372	-0.176271	0.0854353	-0.130862		-0.785069	0.517768	0.845346	0.819885	0.725387	1.96981	5.42722	#N/A	#N/A	5											1	-0.323666	-0.743978	-0.732133	-0.542309	-0.0224323	0.665684	0.0793227
Q2/1966	6.00479	3.32811				0.743883	-0.0488081				1	0.203137	0.637548	0.684236	1.60153	0.823762	-0.576035	-0.16361	0.0918869	-0.0751529		-0.722911	0.544951	0.252739	0.25939	0.181207	0.787467	6.29999	#N/A	#N/A	6											1	-0.333004	-0.323666	-0.743978	-0.732133	-0.0150637	0.679031	0.0848781
Q3/1966	4.53589	3.80135				0.414591	0.139281				1	0.743883	0.203137	0.637548	0.684236	0.751762	-0.557568	-0.1376	0.104574	-0.0343143		-0.624909	0.352237	0.483776	0.539213	0.477579	0.0773679	0.078947	#N/A	#N/A	6											1	-0.0488081	-0.333004	-0.323666	-0.743978	0.00139622	0.683556	0.0917625
Q4/1966	2.17784	3.41166				-0.114026	-0.015603				1	0.414591	0.743883	0.203137	0.637548	0.71932	-0.584091	-0.0884329	0.119952	-0.0331254		-0.585697	0.414625	0.452374	0.426683	0.420415	5.56109	5.68357	#N/A	#N/A	6											1	0.139281	-0.0488081	-0.333004	-0.323666	0.00238728	0.667862	0.106318
Q1/1967	6.79649	1.73284				0.921365	-0.682862				1	-0.114026	0.414591	0.743883	0.203137	0.694629	-0.552355	-0.116329	0.0769558	-0.0821041		-0.673832	0.74995	0.522979	0.521885	0.533635	0.584677	2.99144	#N/A	#N/A	6											1	-0.015603	0.139281	-0.0488081	-0.333004	0.033432	0.667587	0.116006
Q2/1967	4.35452	1.99319				0.373932	-0.579381				1	0.921365	-0.114026	0.414591	0.743883	0.710521	-0.593359	-0.0799161	0.0842613	-0.0456506		-0.634664	0.173909	0.264483	0.402276	0.409838	0.79613	0.0256532	#N/A	#N/A	7											1	-0.682862	-0.015603	0.139281	-0.0488081	0.038607	0.638004	0.108288
Q3/1967	3.80659	3.87493				0.2511	0.168528				1	0.373932	0.921365	-0.114026	0.414591	0.669534	-0.563927	-0.113425	0.071083	-0.0499083		-0.656178	0.32536	0.505164	0.418484	0.474107	0.109732	0.989597	#N/A	#N/A	7											1	-0.579381	-0.682862	-0.015603	0.139281	0.035579	0.621709	0.102482
Q4/1967	3.88003	4.11401				0.267563	0.263552				1	0.2511	0.373932	0.921365	-0.114026	0.660713	-0.571776	-0.0977544	0.046436	-0.0509724		-0.674067	0.529183	0.514825	0.47972	0.499784	1.36196	1.07306	#N/A	#N/A	7											1	0.168528	-0.579381	-0.682862	-0.015603	0.0409432	0.618856	0.110088
Q1/1968	11.4724	4.27456				1.96958	0.327362				1	0.267563	0.2511	0.373932	0.921365	0.613141	-0.590552	-0.138625	0.0175564	-0.0379728		-0.749594	0.3919	0.303993	0.322902	0.358097	49.5293	51.6744	#N/A	#N/A	7											1	0.263552	0.168528	-0.579381	-0.682862	0.0546539	0.634715	0.122533
Q2/1968	-31.5348	4.75488				-7.6716	0.51827				1	1.96958	0.267563	0.2511	0.373932	0.643831	-0.596054	-0.18613	0.0102631	-0.0696154		-0.841537	-0.603404	0.334822	0.427768	0.433512	994.121	1307.19	#N/A	#N/A	8											1	0.327362	0.263552	0.168528	-0.579381	0.080306	0.638238	0.12944
Q3/1968	43.0868	3.55445				9.05677	0.0411491				1	-7.6716	1.96958	0.267563	0.2511	0.662474	-0.578259	-0.178814	-0.0240219	-0.089109		-0.870204	4.71765	0.622159	0.356247	0.398184	374.65	1491.82	#N/A	#N/A	8											1	0.51827	0.327362	0.263552	0.168528	0.0764006	0.648163	0.151474
Q4/1968	4.07751	5.69544				0.311834	0.8921				1	9.05677	-7.6716	1.96958	0.267563	0.687051	-0.561931	-0.205535	-0.00111387	-0.135817		-0.904397	-2.86398	-0.764913	0.38689	0.353064	200.693	0.0338267	#N/A	#N/A	8											1	0.0411491	0.51827	0.327362	0.263552	0.0596442	0.653041	0.152439
Q1/1969	0.734307	4.50461				-0.437632	0.4188				1	0.311834	9.05677	-7.6716	1.96958	0.636704	-0.569272	-0.155125	-0.0330966	-0.114945		-0.872438	-0.918232	0.175974	0.269987	0.154115	4.5961	6.96777	7.8855	#N/A	8											1	0.8921	0.0411491	0.51827	0.327362	0.0359049	0.651726	0.153433
Q2/1969	9.69373	4.67743				1.57086	0.487489				1	-0.437632	0.311834	9.05677	-7.6716	0.633729	-0.522697	-0.150525	0.0187162	-0.0835646		-0.738071	1.62612	1.69312	2.20866	1.21341	0.0607758	2.54239	7.88164	#N/A												1	0.4188	0.8921	0.0411491	0.51827	0.0172861	0.668291	0.16552
Q3/1969	3.76377	5.46338				0.241501	0.79987				1	1.57086	-0.437632	0.311834	9.05677	0.628459	-0.444274	-0.1231	0.0226323	-0.0873729		-0.632114	-0.799816	-0.901355	-1.23605	-1.81711	21.5769	84.3277	7.92	#N/A												1	0.487489	0.4188	0.8921	0.0411491	0.00920186	0.67589	0.15405
Q4/1969	3.14858	5.07514				0.10359	0.645559				1	0.241501	1.57086	-0.437632	0.311834	0.65232	-0.447944	-0.0624934	0.0820536	-0.078636		-0.507019	0.385543	0.753273	0.825843	1.07226	1.58188	18.6711	7.91826	10.3211												1	0.79987	0.487489	0.4188	0.8921	-0.00594952	0.699395	0.118955
Q1/1970	7.57335	5.54026				1.09552	0.830423				1	0.10359	0.241501	1.57086	-0.437632	0.6279	-0.413887	-0.00716487	0.0949729	-0.051661		-0.37774	0.755093	0.627835	0.466047	0.404745	2.30603	9.49494	7.91379	10.3291												1	0.645559	0.79987	0.487489	0.4188	-0.0479504	0.716058	0.13084
Q2/1970	5.01657	5.71276				0.522347	0.898986				1	1.09552	0.10359	0.241501	1.57086	0.610204	-0.399993	0.0293125	0.0828289	-0.0897469		-0.377599	0.0540648	0.256419	0.243282	0.173327	4.36353	2.42395	7.91707	10.3308												1	0.830423	0.645559	0.79987	0.487489	-0.0611843	0.718697	0.115876
Q3/1970	5.47136	3.68555				0.624302	0.0932563				1	0.522347	1.09552	0.10359	0.241501	0.61516	-0.374649	0.033724	0.0901036	-0.103144		-0.353965	0.440833	0.607597	0.513724	0.516753	0.669801	0.230164	7.91647	10.331												1	0.898986	0.830423	0.645559	0.79987	-0.0508192	0.710589	0.117311
Q4/1970	6.23194	5.63388				0.794806	0.867636				1	0.624302	0.522347	1.09552	0.10359	0.597871	-0.336052	0.0484941	0.106289	-0.146855		-0.328123	0.514633	0.555644	0.450198	0.479802	1.56198	1.97449	7.91954	10.3337												1	0.0932563	0.898986	0.830423	0.645559	-0.0779076	0.690171	0.144099
Q1/1971	0.516	7.13896				-0.486571	1.46584				1	0.794806	0.624302	0.522347	1.09552	0.578176	-0.297076	0.0402897	0.0857335	-0.204112		-0.375165	0.188386	0.349841	0.355925	0.354097	9.06514	14.0628	7.64633	10.1355												1	0.867636	0.0932563	0.898986	0.830423	-0.0788728	0.701769	0.141285
Q2/1971	7.22235	5.50762				1.01683	0.817451				1	-0.486571	0.794806	0.624302	0.522347	0.596803	-0.284077	0.0265549	0.0810573	-0.206682		-0.383147	0.698777	0.50114	0.494911	0.486396	2.01291	5.5987	7.52254	9.90931												1	1.46584	0.867636	0.0932563	0.898986	-0.0583315	0.703706	0.156021
Q3/1971	6.4698	4.41554				0.848128	0.383399				1	1.01683	-0.486571	0.794806	0.624302	0.559891	-0.28292	0.0185032	0.0358632	-0.183594		-0.412147	0.177092	0.320768	0.377604	0.411539	8.9601	3.79286	7.36195	9.81924												1	0.817451	1.46584	0.867636	0.0932563	-0.0499899	0.678549	0.150408
Q4/1971	3.41252	3.3604				0.16276	-0.0359749				1	0.848128	1.01683	-0.486571	0.794806	0.604955	-0.272101	-0.00837884	0.123769	-0.189486		-0.346198	0.154831	0.365231	0.320524	0.340112	0.00125088	0.625884	7.35649	9.79347												1	0.383399	0.817451	1.46584	0.867636	-0.0468072	0.673519	0.159543
Q1/1972	5.20517	5.99933				0.564628	1.01288				1	0.16276	0.848128	1.01683	-0.486571	0.553837	-0.259326	0.00490412	0.0735556	-0.231308		-0.412174	0.70313	0.773769	0.585635	0.671474	0.381708	0.227161	7.35574	9.79242												1	-0.0359749	0.383399	0.817451	1.46584	-0.0538186	0.665715	0.136402
Q2/1972	1.53376	2.73564				-0.258413	-0.28429				1	0.564628	0.16276	0.848128	1.01683	0.494619	-0.216511	0.0280002	0.0423146	-0.196908		-0.343104	0.212595	0.199479	0.30541	0.220628	4.41446	4.56633	7.36241	9.79553												1	1.01288	-0.0359749	0.383399	0.817451	-0.065321	0.665154	0.155672
Q3/1972	3.53617	4.32561				0.190478	0.347656				1	-0.258413	0.564628	0.16276	0.848128	0.396738	-0.200459	0.0129183	0.0543758	-0.205141		-0.338306	0.290698	0.304284	0.321349	0.373824	0.199864	0.668908	7.36248	9.79596												1	-0.28429	1.01288	-0.0359749	0.383399	-0.0549184	0.645985	0.153414
Q4/1972	6.58642	5.54552				0.874271	0.832516				1	0.190478	-0.258413	0.564628	0.16276	0.408119	-0.177196	0.0303464	0.0324512	-0.178348		-0.292746	0.355821	0.33244	0.426534	0.485553	5.34855	3.00671	7.36283	9.79361												1	0.347656	-0.28429	1.01288	-0.0359749	-0.0659526	0.645764	0.144168
Q1/1973	7.89078	5.5382				1.16668	0.829604				1	0.874271	0.190478	-0.258413	0.564628	0.407606	-0.152707	0.0268397	0.0175357	-0.191354		-0.299686	0.166636	0.241764	0.203973	0.308606	19.9003	14.6511	7.36537	9.79309												1	0.832516	0.347656	-0.28429	1.01288	-0.077144	0.649287	0.157025
Q2/1973	4.29835	7.23145				0.361341	1.5026				1	1.16668	0.874271	0.190478	-0.258413	0.374902	-0.0869376	0.0386479	0.0155251	-0.197449		-0.230214	0.361243	0.458413	0.428346	0.428963	1.92253e-07	0.0909891	7.34841	9.7592												1	0.829604	0.832516	0.347656	-0.28429	-0.0636616	0.671059	0.169564
Q3/1973	3.42071	9.04612				0.164596	2.22385				1	0.361341	1.16668	0.874271	0.190478	0.383588	-0.0746134	0.0488472	0.0228916	-0.196948		-0.199822	0.396116	0.364549	0.320958	0.31713	1.0666	0.462977	7.33884	9.75914												1	1.5026	0.829604	0.832516	0.347656	-0.0559515	0.670286	0.165065
Q4/1973	5.08087	9.60398				0.536763	2.44558				1	0.164596	0.361341	1.16668	0.874271	0.345068	-0.0323618	0.0718563	-0.00198075	-0.208106		-0.170592	0.181454	0.226205	0.202659	0.206524	2.51209	2.17009	7.33319	9.76257												1	2.22385	1.5026	0.829604	0.832516	-0.0369045	0.653639	0.172415
Q1/1974	3.81886	9.26757				0.253851	2.31187				1	0.536763	0.164596	0.361341	1.16668	0.34792	-0.0573812	0.0674218	0.0155764	-0.236688		-0.211071	0.0577071	0.107514	0.164557	0.146621	0.765544	0.228798	7.33062	9.75424												1	2.44558	2.22385	1.5026	0.829604	-0.0266986	0.658094	0.148476
Q2/1974	1.99757	10.2766				-0.154438	2.71293				1	0.253851	0.536763	0.164596	0.361341	0.303205	-0.0294496	0.0594583	0.0539124	-0.249404		-0.165483	0.246398	0.297837	0.279104	0.320262	3.19709	4.48395	7.33576	9.75133												1	2.31187	2.44558	2.22385	1.5026	-0.0253393	0.669088	0.173373
Q3/1974	3.75612	11.314				0.239785	3.12523				1	-0.154438	0.253851	0.536763	0.164596	0.322399	0.0188113	0.0373841	0.0860092	-0.283933		-0.141728	0.328416	0.298929	0.304124	0.309148	0.156314	0.0957374	7.33593	9.75136												1	2.71293	2.31187	2.44558	2.22385	-0.0198927	0.679261	0.155285
Q4/1974	-6.08681	10.7387				-1.96676	2.89659				1	0.239785	-0.154438	0.253851	0.536763	0.291431	-0.00538754	0.0725262	0.0549885	-0.213019		-0.0908918	0.178556	0.192232	0.188866	0.224404	91.581	95.5372	7.51691	9.89429												1	3.12523	2.71293	2.31187	2.44558	-0.0269941	0.676305	0.144345
Q1/1975	-1.80368	7.14514				-1.00659	1.4683				1	-1.96676	0.239785	-0.154438	0.253851	0.225729	0.0252689	0.0231249	0.0406871	-0.199371		-0.110291	0.124682	0.245292	0.252933	0.265389	25.4656	32.1944	7.56845	9.9403												1	2.89659	3.12523	2.71293	2.31187	-0.0453337	0.676063	0.130084
Q2/1975	1.00973	4.65936				-0.37589	0.480304				1	-1.00659	-1.96676	0.239785	-0.154438	0.262167	0.00379623	0.0659661	0.00705679	-0.242608		-0.165788	0.167766	0.223945	0.349143	0.40644	5.88124	12.1787	7.57894	9.95939												1	1.4683	2.89659	3.12523	2.71293	-0.0526602	0.648099	0.117488
Q3/1975	1.54642	6.3766				-0.255576	1.16283				1	-0.37589	-1.00659	-1.96676	0.239785	0.247947	-0.0174634	0.0549667	0.0213577	-0.218462		-0.159601	0.104794	0.12435	0.106443	0.266079	2.58416	5.4149	7.58404	9.96633												1	0.480304	1.4683	2.89659	3.12523	-0.0307512	0.649528	0.122029
Q4/1975	5.3652	6.46325				0.600503	1.19727				1	-0.255576	-0.37589	-1.00659	-1.96676	0.229051	0.0742649	0.0997316	0.0287588	-0.179294		0.0234616	0.496262	0.633621	0.743754	0.630787	0.216219	0.0182499	7.58168	9.96467												1	1.16283	0.480304	1.4683	2.89659	-0.0440748	0.664524	0.121048
Q1/1976	5.82825	4.64886				0.704307	0.476131				1	0.600503	-0.255576	-0.37589	-1.00659	0.244854	0.0539322	0.0998296	0.0436631	-0.101764		0.0956612	0.337747	0.410081	0.454515	0.518582	2.67369	0.686374	7.48449	9.8844												1	1.19727	1.16283	0.480304	1.4683	-0.0255186	0.678479	0.131161
Q2/1976	4.74084	4.67848				0.460536	0.487903				1	0.704307	0.600503	-0.255576	-0.37589	0.273896	0.0697445	0.0692606	0.0186036	-0.131337		0.0262721	0.409222	0.35011	0.369043	0.359194	0.0523961	0.204363	4.9953	7.54042												1	0.476131	1.19727	1.16283	0.480304	-0.0408734	0.66186	0.166091
Q3/1976	1.8872	5.70851				-0.179181	0.897298				1	0.460536	0.704307	0.600503	-0.255576	0.206619	0.0528985	0.0961618	-0.00985546	-0.104738		0.0344664	0.319558	0.395955	0.349681	0.357451	4.94958	5.73026	3.66059	3.22763												1	0.487903	0.476131	1.19727	1.16283	-0.0669011	0.656935	0.190709
Q4/1976	4.95258	7.34585				0.508003	1.54807				1	-0.179181	0.460536	0.704307	0.600503	0.190041	0.075829	0.105317	0.0158503	-0.0909254		0.106071	0.181519	0.197972	0.264089	0.252302	2.12102	1.30103	2.68226	3.23376												1	0.897298	0.487903	0.476131	1.19727	-0.0559417	0.664773	0.198816
Q1/1977	4.39753	6.69263				0.383574	1.28844				1	0.508003	-0.179181	0.460536	0.704307	0.19757	0.113465	0.0677846	-0.0348052	-0.0814337		0.0650103	0.169681	0.128195	0.169513	0.23485	0.910365	0.440135	2.6607	3.20207												1	1.54807	0.897298	0.487903	0.476131	-0.0637583	0.660793	0.227095
Q2/1977	1.73542	6.0766				-0.213208	1.0436				1	0.383574	0.508003	-0.179181	0.460536	0.198057	0.127654	0.0300473	-0.0347949	-0.0591382		0.0637682	0.241285	0.219991	0.174165	0.183238	4.11032	3.12744	2.68437	3.20492												1	1.28844	1.54807	0.897298	0.487903	-0.0638689	0.676811	0.202404
Q3/1977	1.82958	5.43389				-0.192098	0.788147				1	-0.213208	0.383574	0.508003	-0.179181	0.167742	0.136327	0.0485646	-0.0434221	-0.0745344		0.0669347	0.148601	0.233304	0.230943	0.235918	2.30974	3.64538	2.56978	2.78392												1	1.0436	1.28844	1.54807	0.897298	-0.0655922	0.678329	0.196245
Q4/1977	0.91197	9.07531				-0.397804	2.23545				1	-0.192098	-0.213208	0.383574	0.508003	0.127291	0.1036	0.0353623	-0.0710275	-0.0864445		-0.0185102	0.0286915	0.123126	0.1917	0.191411	3.61952	6.90829	2.58214	2.71709												1	0.788147	1.0436	1.28844	1.54807	-0.0339293	0.670884	0.199585
Q1/1978	5.51831	6.42469				0.634827	1.18195				1	-0.397804	-0.192098	-0.213208	0.383574	0.106018	0.098548	0.0639082	-0.0512157	-0.101412		0.00982808	0.0265588	0.105456	0.172412	0.198459	7.36228	3.78903	2.61256	2.68408												1	2.23545	0.788147	1.0436	1.28844	-0.0328729	0.688812	0.214345
Q2/1978	6.59579	7.7201				0.876372	1.69682				1	0.634827	-0.397804	-0.192098	-0.213208	0.0346233	0.114798	0.131537	-0.0160877	-0.0695147		0.160732	0.0730857	0.114673	0.171305	0.206665	12.8399	8.92467	2.66277	2.72166												1	1.18195	2.23545	0.788147	1.0436	-0.044785	0.667751	0.227688
Q3/1978	-0.35199	7.14345				-0.681154	1.46762				1	0.876372	0.634827	-0.397804	-0.192098	-0.0172209	0.142694	0.108642	0.0275698	-0.105743		0.173163	0.186147	0.14627	0.158871	0.163335	14.9679	14.1909	2.74539	2.80066												1	1.69682	1.18195	2.23545	0.788147	-0.0233897	0.661857	0.182793
Q4/1978	3.39004	8.53266				0.15772	2.01978				1	-0.681154	0.876372	0.634827	-0.397804	0.0507218	0.174289	0.0841139	0.0255869	-0.0777007		0.206289	0.0528722	0.164119	0.0784685	0.167985	0.218744	0.00209689	2.73773	2.78964												1	1.46762	1.69682	1.18195	2.23545	-0.0302234	0.671448	0.17845
Q1/1979	3.42551	7.26693				0.165671	1.5167				1	0.15772	-0.681154	0.876372	0.634827	0.0298502	0.181673	0.087686	0.0200822	-0.0618253		0.227616	-0.0228731	-0.0242606	-0.0165456	0.0175656	0.707371	0.436479	2.68961	2.71224												1	2.01978	1.46762	1.69682	1.18195	-0.0312609	0.664749	0.187045
Q2/1979	3.80581	9.46625				0.250924	2.39083				1	0.165671	0.15772	-0.681154	0.876372	0.0276333	0.184804	0.122569	0.0331007	-0.0775432		0.26293	-0.012922	-0.0283365	-0.0345827	-0.0892897	1.38524	2.30317	2.68596	2.69319												1	1.5167	2.01978	1.46762	1.69682	-0.0286996	0.670655	0.232087
Q3/1979	4.54646	8.35509				0.416961	1.9492				1	0.250924	0.165671	0.15772	-0.681154	0.0340605	0.193279	0.0930653	0.0324689	-0.0823975		0.236416	0.159224	0.103591	0.0679765	0.0969327	1.32183	2.03797	2.64115	2.68299												1	2.39083	1.5167	2.01978	1.46762	-0.00934331	0.662075	0.21159
Q4/1979	0.760105	7.73597				-0.431849	1.70313				1	0.416961	0.250924	0.165671	0.15772	-0.0179044	0.150886	0.190273	0.0486477	-0.100516		0.28929	0.0849593	0.0805709	0.0384472	0.0295046	5.31472	4.23535	2.6724	2.70393												1	1.9492	2.39083	1.5167	2.01978	-0.0145645	0.681976	0.211367
Q1/1980	4.4498	8.00031				0.395293	1.80819				1	-0.431849	0.416961	0.250924	0.165671	-0.0104013	0.154649	0.201591	0.032616	-0.054222		0.334634	0.00607076	0.0698054	0.0589477	0.0341611	3.01451	2.5951	2.68775	2.71758												1	1.70313	1.9492	2.39083	1.5167	0.0163157	0.694343	0.206359
Q2/1980	-2.29657	8.27538				-1.11708	1.91752				1	0.395293	-0.431849	0.416961	0.250924	-0.0280898	0.156122	0.234609	0.0147552	-0.0292507		0.376236	-0.0688786	-0.0965255	0.00385587	0.0374465	21.8632	26.5235	2.78734	2.84102												1	1.80819	1.70313	1.9492	2.39083	-0.019414	0.720548	0.180761
Q3/1980	-0.00276612	9.06643				-0.602866	2.23192				1	-1.11708	0.395293	-0.431849	0.416961	-0.0289832	0.156078	0.217805	-0.0154909	-0.0225503		0.335842	-0.119951	0.0353276	-0.0607987	-0.0418188	4.64048	6.26355	2.81213	2.87162												1	1.91752	1.80819	1.70313	1.9492	-0.0192025	0.702717	0.197283
Q4/1980	-0.240765	10.7537				-0.65622	2.90255				1	-0.602866	-1.11708	0.395293	-0.431849	-0.0838739	0.171062	0.205597	-0.0163088	-0.0621099		0.29824	-0.396295	-0.287396	-0.0202694	-0.0156488	1.34437	8.165	2.78979	2.89955												1	2.23192	1.91752	1.80819	1.70313	-0.0296997	0.698093	0.151876
Q1/1981	1.37485	9.79726				-0.294039	2.5224				1	-0.65622	-0.602866	-1.11708	0.395293	-0.0753572	0.178587	0.207974	-0.02917	-0.0469854		0.310405	-0.303917	-0.281946	-0.0915748	-0.035545	0.00194185	1.3296	2.67602	2.82686												1	2.90255	2.23192	1.91752	1.80819	-0.0418731	0.688802	0.161751
Q2/1981	1.96355	7.30946				-0.162065	1.5336				1	-0.294039	-0.65622	-0.602866	-1.11708	-0.0603221	0.180822	0.194559	-0.0360464	-0.0245816		0.314753	-0.191974	-0.196037	-0.134367	-0.0788237	0.0177994	0.13788	2.67613	2.82712												1	2.5224	2.90255	2.23192	1.91752	-0.0341216	0.672165	0.125718
Q3/1981	3.19503	7.13565				0.114004	1.46452				1	-0.162065	-0.294039	-0.65622	-0.602866	-0.0722008	0.179267	0.192273	-0.0255084	-0.00850567		0.337527	-0.135923	-0.113769	-0.126106	-0.120919	1.24293	1.09818	2.67716	2.83062												1	1.5336	2.5224	2.90255	2.23192	-0.0356296	0.669516	0.136372
Q4/1981	2.1674	7.55553				-0.116367	1.63141				1	0.114004	-0.162065	-0.294039	-0.65622	-0.0399429	0.183367	0.229563	0.0337015	-0.0184067		0.428225	-0.0540731	-0.114646	-0.0915144	-0.0989506	0.0772172	0.00603588	2.66291	2.81865												1	1.46452	1.5336	2.5224	2.90255	-0.0503708	0.649943	0.121484
Q1/1982	3.16341	5.8858				0.106914	0.967761				1	-0.116367	0.114004	-0.162065	-0.294039	-0.0801481	0.195832	0.222266	-0.035789	-0.0465246		0.335785	-0.0581171	-0.0237366	-0.112252	-0.0848569	0.541941	0.731788	2.66159	2.82144												1	1.63141	1.46452	1.5336	2.5224	-0.0442372	0.646857	0.105124
Q2/1982	2.77046	4.84034				0.0188242	0.552237				1	0.106914	-0.116367	0.114004	-0.162065	-0.065472	0.183357	0.215515	-0.0582472	-0.0939439		0.246681	-0.0623628	-0.113934	-0.0498833	-0.109522	0.131158	0.327783	2.64353	2.79833												1	0.967761	1.63141	1.46452	1.5336	-0.0596966	0.658222	0.0955579
Q3/1982	0.217449	5.65062				-0.553499	0.874288				1	0.0188242	0.106914	-0.116367	0.114004	-0.0721678	0.181759	0.243601	-0.0487676	-0.128928		0.247664	-0.0517255	-0.0577971	-0.116517	-0.0584597	5.01	4.87643	2.67207	2.8249												1	0.552237	0.967761	1.63141	1.46452	-0.0528497	0.668826	0.110221
Q4/1982	2.38549	4.24206				-0.0674759	0.314447				1	-0.553499	0.0188242	0.106914	-0.116367	-0.0288266	0.204102	0.245562	-0.0429818	-0.079499		0.327183	-0.132519	-0.0671948	-0.084805	-0.120796	0.0841826	0.0565714	2.06898	2.23523												1	0.874288	0.552237	0.967761	1.63141	-0.0400525	0.678425	0.108384
Q1/1983	1.61019	3.18487				-0.241279	-0.10574				1	-0.0674759	-0.553499	0.0188242	0.106914	-0.0394482	0.156548	0.240953	-0.0603452	-0.0991392		0.238017	-0.195114	-0.201101	-0.111684	-0.0998892	0.0424085	0.397797	1.86714	2.00066												1	0.314447	0.874288	0.552237	0.967761	-0.0473283	0.691019	0.115291
Q2/1983	0.044893	2.7272				-0.592182	-0.287644				1	-0.241279	-0.0674759	-0.553499	0.0188242	-0.0792011	0.186873	0.206483	-0.0780012	-0.11912		0.196236	-0.0972912	-0.0547166	-0.0801194	-0.10874	4.8735	4.65061	1.85868	1.94097												1	-0.10574	0.314447	0.874288	0.552237	-0.0607139	0.69538	0.11264
Q3/1983	0.61214	4.19882				-0.465019	0.297259				1	-0.592182	-0.241279	-0.0674759	-0.553499	-0.0964281	0.182181	0.197643	-0.107768	-0.133476		0.138579	-0.170849	-0.0760065	-0.036082	-0.0448633	1.72194	3.51271	1.85142	1.9256												1	-0.287644	-0.10574	0.314447	0.874288	-0.0661429	0.728564	0.101533
Q4/1983	1.87543	2.91057				-0.18182	-0.214764				1	-0.465019	-0.592182	-0.241279	-0.0674759	-0.140602	0.175723	0.153722	-0.126328	-0.118315		0.0848024	-0.274884	-0.209585	-0.0866359	-0.0398172	0.17234	0.401249	1.85105	1.9287												1	0.297259	-0.287644	-0.10574	0.314447	-0.0656948	0.735098	0.0918097
Q1/1984	2.67036	4.18786				-0.00361631	0.292903				1	-0.18182	-0.465019	-0.592182	-0.241279	-0.134252	0.177685	0.163181	-0.14775	-0.144771		0.0483457	-0.120016	-0.157033	-0.0723541	-0.0747551	0.269606	0.100701	1.83065	1.92395												1	-0.214764	0.297259	-0.287644	-0.10574	-0.0404873	0.727806	0.0584247
Q2/1984	1.16611	3.2864				-0.340832	-0.0653891				1	-0.00361631	-0.18182	-0.465019	-0.592182	-0.159727	0.178979	0.202683	-0.136194	-0.142342		0.103126	-0.0496014	-0.0308099	-0.0816428	-0.0535785	1.6877	1.64192	1.84455	1.93559												1	0.292903	-0.214764	0.297259	-0.287644	-0.0469203	0.728571	0.0389795
Q3/1984	2.25229	3.1523				-0.0973363	-0.118688				1	-0.340832	-0.00361631	-0.18182	-0.465019	-0.175463	0.197387	0.221823	-0.120289	-0.194207		0.104714	-0.13136	-0.0783836	-0.0651262	-0.0893434	0.0230345	0.00127124	1.80234	1.88878												1	-0.0653891	0.292903	-0.214764	0.297259	-0.0193364	0.724917	0.0454427
Q4/1984	0.970609	2.59091				-0.384659	-0.341813				1	-0.0973363	-0.340832	-0.00361631	-0.18182	-0.166929	0.229328	0.195181	-0.063875	-0.149218		0.211417	-0.228413	-0.24125	-0.157437	-0.106797	0.485781	1.53631	1.7881	1.89072												1	-0.118688	-0.0653891	0.292903	-0.214764	-0.0212419	0.742327	0.0577003
Q1/1985	0.726415	4.57997				-0.439401	0.448752				1	-0.384659	-0.0973363	-0.340832	-0.00361631	-0.181918	0.265395	0.226645	-0.0244346	-0.122384		0.345222	-0.297294	-0.215998	-0.21052	-0.196522	0.401837	1.17382	1.78365	1.89678												1	-0.341813	-0.118688	-0.0653891	0.292903	-0.00318564	0.708745	0.0464773
Q2/1985	2.6868	2.59785				6.94993e-05	-0.339056				1	-0.439401	-0.384659	-0.0973363	-0.340832	-0.210577	0.253604	0.303674	0.0231495	-0.190057		0.390371	-0.376297	-0.303909	-0.203969	-0.188538	2.81867	0.70785	1.7723	1.87674												1	0.448752	-0.341813	-0.118688	-0.0653891	-0.00560488	0.700801	0.0390225
Q3/1985	2.57109	2.38659				-0.0258684	-0.423024				1	6.94993e-05	-0.439401	-0.384659	-0.0973363	-0.205902	0.306253	0.307693	0.0307113	-0.205808		0.438849	-0.332862	-0.429847	-0.308643	-0.226749	1.87535	0.802968	1.76847	1.85293												1	-0.339056	0.448752	-0.341813	-0.118688	-0.00867389	0.71594	0.026536
Q4/1985	1.59194	2.27365				-0.245371	-0.467913				1	-0.0258684	6.94993e-05	-0.439401	-0.384659	-0.200974	0.339808	0.281457	0.0219886	-0.18964		0.453613	-0.14646	-0.24215	-0.370924	-0.278369	0.194676	0.0216667	1.73795	1.79391												1	-0.423024	-0.339056	0.448752	-0.341813	0.00027556	0.737389	0.0102789
Q1/1986	1.47222	1.96122				-0.27221	-0.592088				1	-0.245371	-0.0258684	6.94993e-05	-0.439401	-0.14372	0.329383	0.228861	0.016013	-0.250116		0.324141	-0.120559	-0.174694	-0.292046	-0.360378	0.457624	0.154686	1.67472	1.76197												1	-0.467913	-0.423024	-0.339056	0.448752	-0.00210698	0.742865	0.000986438
Q2/1986	4.29341	1.60422				0.360234	-0.733981				1	-0.27221	-0.245371	-0.0258684	6.94993e-05	-0.176841	0.32279	0.252868	-0.054903	-0.260883		0.259872	-0.325351	-0.240018	-0.302141	-0.380087	9.35288	10.9059	1.64186	1.77946												1	-0.592088	-0.467913	-0.423024	-0.339056	-0.00119872	0.745926	0.00708838
Q3/1986	1.63377	1.65552				-0.235994	-0.713592				1	0.360234	-0.27221	-0.245371	-0.0258684	-0.182048	0.388279	0.282941	-0.0854652	-0.224945		0.36081	-0.0924057	-0.330474	-0.247828	-0.351128	0.410262	0.26377	1.49693	1.65265												1	-0.733981	-0.592088	-0.467913	-0.423024	-0.025071	0.728401	0.0132165
Q4/1986	0.961212	2.19912				-0.386765	-0.497536				1	-0.235994	0.360234	-0.27221	-0.245371	-0.173875	0.354531	0.29852	-0.0459932	-0.227774		0.379284	-0.0815965	-0.0375427	-0.286827	-0.22084	1.85311	0.547831	1.51389	1.6578												1	-0.713592	-0.733981	-0.592088	-0.467913	-0.014516	0.722818	0.0369524
Q1/1987	1.08247	2.76308				-0.359582	-0.273384				1	-0.386765	-0.235994	0.360234	-0.27221	-0.106843	0.359056	0.294023	-0.0388299	-0.23384		0.38041	-0.265436	-0.227819	-0.192326	-0.264114	0.17637	0.181357	1.5084	1.65539												1	-0.497536	-0.713592	-0.733981	-0.592088	-0.0289286	0.732318	0.0479548
Q2/1987	4.55375	2.60174				0.418594	-0.337509				1	-0.359582	-0.386765	-0.235994	0.360234	-0.0712952	0.334247	0.275559	-0.0368417	-0.303476		0.269488	-0.398689	-0.390941	-0.3502	-0.340481	13.2913	11.4655	1.62706	1.73973												1	-0.273384	-0.497536	-0.713592	-0.733981	0.00637671	0.728952	0.0333471
Q3/1987	3.04082	2.90399				0.0794336	-0.217378				1	0.418594	-0.359582	-0.386765	-0.235994	-0.0987882	0.304736	0.313649	-0.0520295	-0.302135		0.264221	0.0074152	-0.217774	-0.255055	-0.308534	0.103207	2.99511	1.61532	1.7483												1	-0.337509	-0.273384	-0.497536	-0.713592	-0.00425345	0.731508	0.0487979
Q4/1987	6.0657	3.27301				0.757538	-0.0707111				1	0.0794336	0.418594	-0.359582	-0.386765	-0.0782917	0.300815	0.297849	-0.0362912	-0.276173		0.2862	0.190145	0.170327	-0.123326	-0.21262	6.40603	18.7287	1.62584	1.87336												1	-0.217378	-0.337509	-0.273384	-0.497536	-0.0352162	0.708019	0.04894
Q1/1988	5.15322	3.11176				0.552982	-0.134798				1	0.757538	0.0794336	0.418594	-0.359582	-0.0310447	0.335893	0.26492	-0.0689675	-0.247426		0.28442	0.304551	0.0866819	0.0423053	-0.0487134	1.2281	7.20403	1.60858	1.91141												1	-0.0707111	-0.217378	-0.337509	-0.273384	-0.033055	0.698289	0.071818
Q2/1988	2.6538	3.8552				-0.00732669	0.160687				1	0.552982	0.757538	0.0794336	0.418594	-0.0185843	0.311221	0.271094	-0.117669	-0.254762		0.209884	0.24289	0.16289	-0.114069	-0.159331	1.24582	0.459762	1.394	1.68494												1	-0.134798	-0.0707111	-0.217378	-0.337509	-0.0301728	0.704574	0.047562
Q3/1988	5.25537	4.67604				0.575881	0.486933				1	-0.00732669	0.552982	0.757538	0.0794336	-0.00619315	0.325808	0.271581	-0.0857179	-0.260274		0.251398	0.0559903	0.0975425	0.0324512	-0.115625	5.37831	9.51512	1.40225	1.71482												1	0.160687	-0.134798	-0.0707111	-0.217378	-0.0305358	0.70826	0.0301089
Q4/1988	3.91444	3.20611				0.275277	-0.0972975				1	0.575881	-0.00732669	0.552982	0.757538	-0.0216485	0.352141	0.293376	-0.152921	-0.279514		0.213082	-0.117312	-0.234509	-0.180442	-0.18543	3.06689	4.2235	1.42131	1.67853												1	0.486933	0.160687	-0.134798	-0.0707111	-0.0213009	0.710319	0.0170003
Q1/1989	5.37307	4.33869				0.602267	0.352853				1	0.275277	0.575881	-0.00732669	0.552982	-0.00385021	0.355961	0.293767	-0.141693	-0.284574		0.223462	0.106987	-0.0474551	-0.210691	-0.217758	4.88117	13.3806	1.47397	1.78719												1	-0.0972975	0.486933	0.160687	-0.134798	-0.0489841	0.728598	0.0306655
Q2/1989	3.19939	4.11224				0.114981	0.262847				1	0.602267	0.275277	0.575881	-0.00732669	-0.0200872	0.322683	0.208879	-0.134754	-0.316978		0.07983	0.156474	0.0355871	-0.158792	-0.141419	0.0342595	1.30814	1.47415	1.79739												1	0.352853	-0.0972975	0.486933	0.160687	-0.0492521	0.746611	0.0504666
Q3/1989	4.68686	2.90072				0.448435	-0.21868				1	0.114981	0.602267	0.275277	0.575881	-0.0201234	0.362558	0.206985	-0.126875	-0.265465		0.177203	-0.0415779	-0.0634312	-0.162639	-0.234515	4.77789	9.2811	1.51115	1.86717												1	0.262847	0.352853	-0.0972975	0.486933	-0.0503672	0.751954	0.0655119
Q4/1989	4.72886	2.73203				0.457851	-0.285726				1	0.448435	0.114981	0.602267	0.275277	-0.021495	0.292745	0.210564	-0.169046	-0.260597		0.0736657	-0.0395545	-0.160888	-0.176286	-0.144785	4.92315	7.22657	1.56045	1.92665												1	-0.21868	0.262847	0.352853	-0.0972975	-0.0420869	0.739886	0.0463295
Q1/1990	2.75291	4.29371				0.0148908	0.334975				1	0.457851	0.448435	0.114981	0.602267	-0.0666567	0.298349	0.198227	-0.143457	-0.280023		0.0730962	-0.0263087	-0.115036	-0.26153	-0.302212	0.0337758	2.00089	1.55536	1.93691												1	-0.285726	-0.21868	0.262847	0.352853	-0.0315209	0.755531	0.0651342
Q2/1990	1.8915	4.04631				-0.178217	0.236642				1	0.0148908	0.457851	0.448435	0.114981	-0.0811286	0.274336	0.16331	-0.15905	-0.303721		-0.0251257	-0.108518	-0.0802759	-0.16927	-0.173493	0.0966684	0.000444207	1.55501	1.93427												1	0.334975	-0.285726	-0.21868	0.262847	-0.0131641	0.777022	0.0534251
Q3/1990	1.44968	3.47395				-0.277263	0.00915699				1	-0.178217	0.0148908	0.457851	0.448435	-0.150058	0.29097	0.156641	-0.112143	-0.221112		0.114356	-0.35008	-0.317487	-0.287076	-0.205444	0.105511	0.102634	1.50492	1.89532												1	0.236642	0.334975	-0.285726	-0.21868	-0.034427	0.789469	0.0489172
Q4/1990	1.15232	3.00386				-0.343923	-0.177686				1	-0.277263	-0.178217	0.0148908	0.457851	-0.217306	0.334942	0.0800004	-0.086431	-0.232277		0.0962336	-0.432065	-0.382743	-0.327376	-0.292653	0.154593	0.0523059	1.50565	1.89528												1	0.00915699	0.236642	0.334975	-0.285726	-0.0512686	0.794084	0.0769871
Q1/1991	-0.648378	3.9703				-0.747597	0.206435				1	-0.343923	-0.277263	-0.178217	0.0148908	-0.226391	0.301979	0.122413	-0.10813	-0.204586		0.111677	-0.347965	-0.372259	-0.299568	-0.210051	3.17791	5.74979	1.53785	1.9389												1	-0.177686	0.00915699	0.236642	0.334975	-0.0629083	0.810451	0.100588
Q2/1991	2.26955	2.78346				-0.0934665	-0.265284				1	-0.747597	-0.343923	-0.277263	-0.178217	-0.191244	0.269598	0.106115	-0.101446	-0.21369		0.0605783	-0.36308	-0.307129	-0.311196	-0.218511	1.44646	0.311137	1.50263	1.90361												1	0.206435	-0.177686	0.00915699	0.236642	-0.0603736	0.773581	0.0789973
Q3/1991	0.753666	2.94677				-0.433292	-0.200374				1	-0.0934665	-0.747597	-0.343923	-0.277263	-0.206963	0.286683	0.14891	-0.12725	-0.266797		0.0415457	-0.227346	-0.274323	-0.267821	-0.249573	0.843975	0.67163	1.49347	1.88014												1	-0.265284	0.206435	-0.177686	0.00915699	-0.0819876	0.766943	0.0925738
Q4/1991	2.15373	2.14255				-0.119431	-0.52002				1	-0.433292	-0.0934665	-0.747597	-0.343923	-0.176908	0.309831	0.188944	-0.16053	-0.22328		0.114964	-0.132012	-0.0991677	-0.154396	-0.236877	0.0031498	0.274471	1.4917	1.87909												1	-0.200374	-0.265284	0.206435	-0.177686	-0.0568163	0.763728	0.0796213
Q1/1992	3.56819	1.74824				0.197657	-0.67674				1	-0.119431	-0.433292	-0.0934665	-0.747597	-0.198296	0.372718	0.193162	-0.0970001	-0.260393		0.208487	-0.122771	-0.11775	-0.0578962	-0.065392	2.04307	1.37688	1.51016	1.88967												1	-0.52002	-0.200374	-0.265284	0.206435	-0.0639022	0.744709	0.0611175
Q2/1992	0.0379015	2.48212				-0.593749	-0.385052				1	0.197657	-0.119431	-0.433292	-0.0934665	-0.165101	0.331626	0.171995	-0.109712	-0.283125		0.110784	-0.0460941	-0.200757	-0.147908	-0.184461	5.9681	3.33334	1.55382	1.90361												1	-0.67674	-0.52002	-0.200374	-0.265284	-0.0513777	0.73194	0.0601251
Q3/1992	-0.0979166	1.93186				-0.624197	-0.603757				1	-0.593749	0.197657	-0.119431	-0.433292	-0.239926	0.288027	0.20546	-0.0743892	-0.305278		0.113819	-0.229172	-0.010612	-0.172426	-0.127046	3.10506	4.91811	1.5845	1.94355												1	-0.385052	-0.67674	-0.52002	-0.200374	-0.0848594	0.752611	0.0584403
Q4/1992	-0.869679	2.71131				-0.797207	-0.293962				1	-0.624197	-0.593749	0.197657	-0.119431	-0.194708	0.281728	0.210303	-0.11672	-0.346506		0.0288042	-0.477116	-0.406169	-0.164419	-0.258333	2.03878	5.77824	1.59975	1.97735												1	-0.603757	-0.385052	-0.67674	-0.52002	-0.0832486	0.761962	0.0461136
Q1/1993	-2.76174	2.43168				-1.22136	-0.405104				1	-0.797207	-0.624197	-0.593749	0.197657	-0.177444	0.32606	0.186012	-0.1281	-0.353284		0.0306885	-0.54726	-0.459582	-0.420171	-0.272356	9.04221	17.9209	1.68202	2.10554												1	-0.293962	-0.603757	-0.385052	-0.67674	-0.0922025	0.7849	0.0504007
Q2/1993	0.561728	2.43912				-0.47632	-0.402146				1	-1.22136	-0.797207	-0.624197	-0.593749	-0.137264	0.321115	0.161779	-0.0761072	-0.326949		0.0798376	-0.416801	-0.214453	-0.14593	-0.246091	0.0704901	1.05473	1.6563	2.10811												1	-0.405104	-0.293962	-0.603757	-0.385052	-0.113568	0.770822	0.0472556
Q3/1993	0.61498	2.34555				-0.464382	-0.439334				1	-0.47632	-1.22136	-0.797207	-0.624197	-0.143938	0.295689	0.197208	-0.0962238	-0.264129		0.132545	-0.284065	-0.203942	-0.0265251	-0.0604952	0.646987	3.24595	1.64467	2.12614												1	-0.402146	-0.405104	-0.293962	-0.603757	-0.130049	0.776428	0.061046
Q4/1993	0.903786	1.93783				-0.399639	-0.601385				1	-0.464382	-0.47632	-1.22136	-0.797207	-0.135942	0.302893	0.204975	-0.0638893	-0.252666		0.191313	-0.0947747	0.0062223	0.0834186	0.12576	1.84942	5.49288	1.66031	2.16597												1	-0.439334	-0.402146	-0.405104	-0.293962	-0.112505	0.777122	0.0706126
Q1/1994	2.62041	1.82648				-0.0148131	-0.645644				1	-0.399639	-0.464382	-0.47632	-1.22136	-0.189743	0.317406	0.207842	-0.090845	-0.310245		0.124157	0.00908483	0.079193	0.170313	0.287575	0.0113643	1.8195	1.65611	2.17795												1	-0.601385	-0.439334	-0.402146	-0.405104	-0.129572	0.785226	0.067248
Q2/1994	4.53729	1.90137				0.414904	-0.615877				1	-0.0148131	-0.399639	-0.464382	-0.47632	-0.169335	0.289209	0.232375	-0.109935	-0.305671		0.105978	-0.069836	-0.0799579	0.0186375	0.0607924	4.67563	2.49519	1.61138	2.11675												1	-0.645644	-0.601385	-0.439334	-0.402146	-0.146527	0.798612	0.079736
Q3/1994	2.27169	2.20612				-0.0929883	-0.494752				1	0.414904	-0.0148131	-0.399639	-0.464382	-0.192072	0.266409	0.247044	-0.110613	-0.278152		0.124688	0.0881766	-0.00709165	-0.0328559	0.00932445	0.653085	0.208296	1.61373	2.11634												1	-0.615877	-0.645644	-0.601385	-0.439334	-0.1512	0.806557	0.0743466
Q4/1994	3.77032	2.40064				0.242969	-0.417439				1	-0.0929883	0.414904	-0.0148131	-0.399639	-0.1896	0.295489	0.284322	-0.117023	-0.254221		0.208568	0.00421926	0.0467169	-0.0638273	-0.0936292	1.13425	2.25448	1.60675	2.1289												1	-0.494752	-0.615877	-0.645644	-0.601385	-0.158485	0.827582	0.0668428
Q1/1995	1.90806	2.59226				-0.174506	-0.341277				1	0.242969	-0.0929883	0.414904	-0.0148131	-0.204716	0.311966	0.281435	-0.0690603	-0.327177		0.197164	-0.178895	-0.259579	-0.199617	-0.177237	0.000383278	0.000148402	1.60504	2.12757												1	-0.417439	-0.494752	-0.615877	-0.645644	-0.192142	0.850016	0.0699253
Q2/1995	1.94154	1.65805				-0.166998	-0.712586				1	-0.174506	0.242969	-0.0929883	0.414904	-0.184163	0.304749	0.3182	-0.0816929	-0.30145		0.239806	-0.277507	-0.32147	-0.359699	-0.358871	0.243005	0.732567	1.47255	2.04723												1	-0.341277	-0.417439	-0.494752	-0.615877	-0.197808	0.869243	0.0778482
Q3/1995	0.498082	1.32438				-0.490588	-0.845207				1	-0.166998	-0.174506	0.242969	-0.0929883	-0.142629	0.323018	0.336738	-0.0803633	-0.316929		0.262463	-0.245391	-0.316078	-0.341706	-0.346545	1.19634	0.412861	1.4841	2.02743												1	-0.712586	-0.341277	-0.417439	-0.494752	-0.214244	0.850889	0.0440617
Q4/1995	0.185103	1.02419				-0.56075	-0.96452				1	-0.490588	-0.166998	-0.174506	0.242969	-0.117528	0.344347	0.34824	-0.0342421	-0.354769		0.303576	-0.424839	-0.34111	-0.427777	-0.468929	0.367567	0.167768	1.4191	1.87895												1	-0.845207	-0.712586	-0.341277	-0.417439	-0.226299	0.848265	0.0641443
Q1/1996	2.67292	2.30122				-0.00304166	-0.456953				1	-0.56075	-0.490588	-0.166998	-0.174506	-0.0774151	0.345497	0.306862	0.00963904	-0.303718		0.35828	-0.370305	-0.367035	-0.26672	-0.339828	2.68396	2.257	1.43504	1.83735												1	-0.96452	-0.845207	-0.712586	-0.341277	-0.202391	0.856019	0.0570934
Q2/1996	0.970201	2.33963				-0.38475	-0.441686				1	-0.00304166	-0.56075	-0.490588	-0.166998	-0.0640907	0.352152	0.279708	0.0421168	-0.250253		0.423724	-0.200878	-0.331436	-0.315816	-0.271002	0.672748	0.257459	1.42879	1.83563												1	-0.456953	-0.96452	-0.845207	-0.712586	-0.186239	0.869282	0.0519202
Q3/1996	2.40281	0.889056				-0.0635948	-1.01823				1	-0.38475	-0.00304166	-0.56075	-0.490588	-0.0989507	0.326406	0.281768	0.057737	-0.228736		0.437175	-0.145553	-0.0365271	-0.161962	-0.165502	0.133663	0.206647	1.37024	1.7546												1	-0.441686	-0.456953	-0.96452	-0.845207	-0.185016	0.878389	0.0429041
Q4/1996	0.400229	1.96855				-0.512524	-0.589178				1	-0.0635948	-0.38475	-0.00304166	-0.56075	-0.0788379	0.303046	0.311371	0.0295969	-0.222738		0.421276	-0.0930994	-0.126782	0.0070603	-0.0683369	3.5005	3.92603	1.37517	1.75195												1	-1.01823	-0.441686	-0.456953	-0.96452	-0.193245	0.880781	0.025292
Q1/1997	1.50077	3.01495				-0.265809	-0.173277				1	-0.512524	-0.0635948	-0.38475	-0.00304166	-0.0869956	0.304128	0.330625	-0.00513168	-0.225301		0.40432	-0.261235	-0.137563	-0.202864	-0.0795204	0.00041629	0.690546	1.31855	1.63486												1	-0.589178	-1.01823	-0.441686	-0.456953	-0.182088	0.8491	0.017587
Q2/1997	4.61095	1.97665				0.431418	-0.585958				1	-0.265809	-0.512524	-0.0635948	-0.38475	-0.0486903	0.321758	0.35207	0.000891615	-0.207317		0.467402	-0.234952	-0.248887	-0.0656979	-0.121287	8.83594	6.07869	1.41902	1.67984												1	-0.173277	-0.589178	-1.01823	-0.441686	-0.173837	0.853302	0.0205173
Q3/1997	2.88452	2.47813				0.0443936	-0.386642				1	0.431418	-0.265809	-0.512524	-0.0635948	-0.0128465	0.348786	0.319989	0.00636349	-0.1524		0.522738	0.0590007	-0.205144	-0.232102	-0.130171	0.00424572	0.606365	1.36545	1.59711												1	-0.585958	-0.173277	-0.589178	-1.01823	-0.178406	0.865313	0.0155147
Q4/1997	4.26408	2.32764				0.353658	-0.446452				1	0.0443936	0.431418	-0.265809	-0.512524	0.0168999	0.373562	0.33969	0.00333152	-0.209021		0.507563	0.286275	0.222199	-0.0913981	-0.123059	0.0903495	4.52214	1.30898	1.57043												1	-0.386642	-0.585958	-0.173277	-0.589178	-0.188087	0.853295	0.0109773
Q1/1998	3.54127	1.62521				0.191621	-0.725637				1	0.353658	0.0443936	0.431418	-0.265809	0.0537573	0.366478	0.281233	-0.0438071	-0.186031		0.417873	0.2264	0.195918	0.126788	-0.0954259	0.0240681	1.63956	1.30886	1.56683												1	-0.446452	-0.386642	-0.585958	-0.173277	-0.164193	0.878974	0.0132569
Q2/1998	3.44303	1.28077				0.169599	-0.862537				1	0.191621	0.353658	0.0443936	0.431418	0.0384817	0.35088	0.238134	-0.00861634	-0.174831		0.405567	0.114128	0.153986	0.0973048	0.0371036	0.0612276	0.349318	1.30844	1.57031												1	-0.725637	-0.446452	-0.386642	-0.585958	-0.16622	0.875911	0.0103397
Q3/1998	2.99417	1.38469				0.0689741	-0.821237				1	0.169599	0.191621	0.353658	0.0443936	0.0262927	0.296282	0.211621	-0.0320745	-0.166		0.309829	0.0983802	0.11335	0.15011	0.111475	0.0172066	0.035944	1.30738	1.56964												1	-0.862537	-0.725637	-0.446452	-0.386642	-0.161491	0.872731	0.004956
Q4/1998	2.94489	0.598213				0.0579278	-1.13383				1	0.0689741	0.169599	0.191621	0.353658	0.0675507	0.332481	0.201343	-0.0423738	-0.200388		0.291062	0.0456421	0.0264783	0.0419503	0.0763659	0.00300345	0.00676477	1.30557	1.56919												1	-0.821237	-0.862537	-0.725637	-0.446452	-0.172027	0.866146	0.00731081
Q1/1999	2.34096	0.825056				-0.0774597	-1.04367				1	0.0579278	0.0689741	0.169599	0.191621	0.0210689	0.378933	0.163848	-0.0724458	-0.237347		0.232989	-0.0034464	0.0510281	0.0177082	0.045709	0.109004	0.301872	1.26831	1.51397												1	-1.13383	-0.821237	-0.862537	-0.725637	-0.177258	0.851913	-0.0078287
Q2/1999	3.31092	1.00039				0.139983	-0.973978				1	-0.0774597	0.0579278	0.0689741	0.169599	-0.000515789	0.399236	0.154422	-0.0624222	-0.211233		0.280003	-0.0626254	-0.0159962	0.056798	0.00583384	0.816838	0.358093	1.26053	1.51446												1	-1.04367	-1.13383	-0.821237	-0.862537	-0.173825	0.850238	-0.0041461
Q3/1999	4.60499	1.99478				0.430082	-0.578751				1	0.139983	-0.0774597	0.0579278	0.0689741	0.000387773	0.431988	0.13735	-0.0525116	-0.208666		0.308161	0.0327851	-0.0556652	-0.00612465	0.0809534	3.14088	2.42545	1.28869	1.53244												1	-0.973978	-1.04367	-1.13383	-0.821237	-0.155492	0.855068	-0.00200123
Q4/1999	5.01845	3.25862				0.522771	-0.076428				1	0.430082	0.139983	-0.0774597	0.0579278	0.0502043	0.489031	0.183775	-0.0389624	-0.219622		0.414221	0.276548	0.0257572	-0.0398111	0.00262784	1.20636	5.38354	1.30319	1.58368												1	-0.578751	-0.973978	-1.04367	-1.13383	-0.145107	0.852311	-0.0105637
Q1/2000	4.17488	5.4647				0.333661	0.800394				1	0.522771	0.430082	0.139983	-0.0774597	0.02472	0.48207	0.193755	-0.0846019	-0.228359		0.362865	0.365909	0.276041	0.0248301	-0.00473453	0.0206932	2.27861	1.27872	1.59255												1	-0.076428	-0.578751	-0.973978	-1.04367	-0.146972	0.853326	-0.00639979
Q2/2000	3.64642	4.36472				0.215195	0.363199				1	0.333661	0.522771	0.430082	0.139983	0.0312811	0.466114	0.198442	-0.10422	-0.220465		0.339871	0.21486	0.234051	0.188519	-0.0162794	2.22396e-06	1.06617	1.20358	1.57015												1	0.800394	-0.076428	-0.578751	-0.973978	-0.165972	0.855759	0.00254773
Q3/2000	2.67254	4.48312				-0.00312775	0.410258				1	0.215195	0.333661	0.522771	0.430082	-0.0053468	0.421333	0.18274	-0.108994	-0.218437		0.276643	-0.00462938	0.0483414	0.0660056	0.0878949	4.48692e-05	0.164862	1.16258	1.52211												1	0.363199	0.800394	-0.076428	-0.578751	-0.149954	0.873053	-0.0138253
Q4/2000	3.37988	3.77431				0.155442	0.128536				1	-0.00312775	0.215195	0.333661	0.522771	0.0154767	0.400923	0.176832	-0.142187	-0.223047		0.21252	-0.111769	-0.118532	-0.0535761	-0.048448	1.42079	0.827204	1.15424	1.47041												1	0.410258	0.363199	0.800394	-0.076428	-0.137146	0.869889	-0.022358
Q1/2001	2.00534	3.93587				-0.152698	0.192748				1	0.155442	-0.00312775	0.215195	0.333661	-0.0360445	0.379475	0.146436	-0.162562	-0.258675		0.104673	-0.0988085	-0.134907	-0.152473	-0.0800519	0.0577861	0.105013	1.02543	1.26703												1	0.128536	0.410258	0.363199	0.800394	-0.149133	0.866625	-0.0249369
Q2/2001	0.76663	4.67272				-0.430386	0.485614				1	-0.152698	0.155442	-0.00312775	0.215195	-0.0679668	0.381939	0.189606	-0.163626	-0.25806		0.149858	-0.151837	-0.105935	-0.105929	-0.137751	1.54393	1.70402	1.04764	1.27501												1	0.192748	0.128536	0.410258	0.363199	-0.150251	0.855213	-0.0478323
Q3/2001	1.28447	3.63819				-0.3143	0.0744333				1	-0.430386	-0.152698	0.155442	-0.00312775	-0.119756	0.414275	0.211104	-0.192846	-0.310231		0.122302	-0.359295	-0.179539	-0.115173	-0.0342586	0.0402869	1.56051	1.03855	1.25419												1	0.485614	0.192748	0.128536	0.410258	-0.150187	0.850716	-0.0621958
Q4/2001	0.00771973	4.02482				-0.600515	0.228103				1	-0.3143	-0.430386	-0.152698	0.155442	-0.127123	0.449953	0.195999	-0.138589	-0.282319		0.225043	-0.37562	-0.378235	-0.180457	-0.119409	1.00643	4.60579	1.02579	1.24309												1	0.0744333	0.485614	0.192748	0.128536	-0.12748	0.85071	-0.0832833
Q1/2002	1.18113	4.68062				-0.337464	0.488753				1	-0.600515	-0.3143	-0.430386	-0.152698	-0.0997663	0.434868	0.174824	-0.1575	-0.339957		0.112235	-0.296162	-0.25498	-0.221928	-0.106682	0.0339445	1.0598	1.02614	1.2335												1	0.228103	0.0744333	0.485614	0.192748	-0.15105	0.844283	-0.0683603
Q2/2002	2.0899	2.61669				-0.133742	-0.331569				1	-0.337464	-0.600515	-0.3143	-0.430386	-0.11758	0.457737	0.162309	-0.185822	-0.364835		0.0693887	-0.154096	-0.137727	-0.150408	-0.0887348	0.00824367	0.040307	0.952418	1.202												1	0.488753	0.228103	0.0744333	0.485614	-0.143245	0.855805	-0.0495286
Q3/2002	1.43018	0.664759				-0.281635	-1.10738				1	-0.133742	-0.337464	-0.600515	-0.3143	-0.1167	0.450867	0.130262	-0.1525	-0.360426		0.0682033	-0.0160983	-0.0166326	-0.0100059	-0.103986	1.40304	0.627981	0.964643	1.20744												1	-0.331569	0.488753	0.228103	0.0744333	-0.14546	0.865227	-0.0667861
Q4/2002	0.14833	-1.13585				-0.568994	-1.82304				1	-0.281635	-0.133742	-0.337464	-0.600515	-0.103431	0.481583	0.0962427	-0.147838	-0.354131		0.0758566	0.0106181	0.126525	0.131592	0.1226	6.68493	9.51751	1.05071	1.29803												1	-1.10738	-0.331569	0.488753	0.228103	-0.131611	0.857911	-0.0515697
Q1/2003	0.600387	-2.96653				-0.467654	-2.55066				1	-0.568994	-0.281635	-0.133742	-0.337464	-0.127925	0.468659	0.0423137	-0.186128	-0.328086		-0.00324075	-0.270896	0.0138559	0.0802752	0.0917076	0.770347	6.22596	1.0621	1.37093												1	-1.82304	-1.10738	-0.331569	0.488753	-0.139483	0.839136	-0.0542573
Q2/2003	-0.865723	-3.14671				-0.79632	-2.62227				1	-0.467654	-0.568994	-0.281635	-0.133742	-0.160638	0.460346	0.0680495	-0.204718	-0.365404		-0.0417273	-0.308115	-0.18266	-0.00673778	-0.0133663	4.74272	12.1982	1.12635	1.49591												1	-2.55066	-1.82304	-1.10738	-0.331569	-0.131931	0.814986	-0.052438
Q3/2003	2.57135	-1.12618				-0.0258113	-1.8192				1	-0.79632	-0.467654	-0.568994	-0.281635	-0.170685	0.433351	0.0975079	-0.148086	-0.341169		0.0416039	-0.381026	-0.114907	-0.0266869	-0.00717636	2.51075	0.00690996	1.14444	1.49166												1	-2.62227	-2.55066	-1.82304	-1.10738	-0.152523	0.822763	-0.0453564
Q4/2003	3.21577	-0.465473				0.118654	-1.5566				1	-0.0258113	-0.79632	-0.467654	-0.568994	-0.145637	0.442249	0.112977	-0.165542	-0.317012		0.0726731	0.0107759	-0.150075	0.069148	0.0889392	0.231571	0.0175693	1.14258	1.49009												1	-1.8192	-2.62227	-2.55066	-1.82304	-0.173032	0.807587	-0.0278329
Q1/2004	3.52581	2.15491				0.188155	-0.515105				1	0.118654	-0.0258113	-0.79632	-0.467654	-0.144548	0.419296	0.107228	-0.143069	-0.30137		0.0820851	0.157301	0.136289	0.00459977	0.0973339	0.0189432	0.164133	1.10554	1.46798												1	-1.5566	-1.8192	-2.62227	-2.55066	-0.163395	0.814417	-0.0363401
Q2/2004	2.52718	2.61676				-0.035713	-0.331539				1	0.188155	0.118654	-0.0258113	-0.79632	-0.0788791	0.423411	0.150359	-0.111676	-0.289235		0.17286	0.251834	0.17781	0.17257	0.144779	1.64528	0.648244	1.1192	1.47213												1	-0.515105	-1.5566	-1.8192	-2.62227	-0.163324	0.796006	-0.0504879
Q3/2004	1.55214	2.26005				-0.254292	-0.473319				1	-0.035713	0.188155	0.118654	-0.0258113	-0.137326	0.418806	0.110812	-0.0840895	-0.272036		0.173493	-0.134389	0.0502561	-0.0623229	-0.0475217	0.286078	0.850746	1.12133	1.47895												1	-0.331539	-0.515105	-1.5566	-1.8192	-0.142957	0.826826	-0.0592705
Q4/2004	2.72241	3.25012				0.00805406	-0.0798078				1	-0.254292	-0.035713	0.188155	0.118654	-0.157102	0.415141	0.0958322	-0.0791106	-0.274903		0.15696	-0.313595	-0.245666	-0.0750654	-0.209877	2.05867	0.945063	1.10105	1.44712												1	-0.473319	-0.331539	-0.515105	-1.5566	-0.166183	0.825428	-0.0516433
Q1/2005	1.05829	4.88684				-0.365003	0.570719				1	0.00805406	-0.254292	-0.035713	0.188155	-0.0907678	0.425416	0.12502	-0.0770601	-0.209482		0.263895	-0.155796	-0.360557	-0.303286	-0.185651	0.870908	0.640079	1.11334	1.44657												1	-0.0798078	-0.473319	-0.331539	-0.515105	-0.147097	0.831954	-0.0648279
Q2/2005	0.788845	4.14361				-0.425406	0.275319				1	-0.365003	0.00805406	-0.254292	-0.035713	-0.10304	0.37626	0.129191	-0.10596	-0.221532		0.17796	-0.204479	-0.128962	-0.306902	-0.270551	0.971221	0.477168	0.996867	1.38475												1	0.570719	-0.0798078	-0.473319	-0.331539	-0.131899	0.810834	-0.0372996
Q3/2005	1.95404	5.16091				-0.164198	0.679648				1	-0.425406	-0.365003	0.00805406	-0.254292	-0.11601	0.401285	0.150096	-0.101311	-0.235202		0.214868	-0.282511	-0.171652	-0.112459	-0.224349	0.278536	0.0719949	1.00116	1.37871												1	0.275319	0.570719	-0.0798078	-0.473319	-0.158746	0.806632	-0.0372349
Q4/2005	2.80513	4.67672				0.0265965	0.487207				1	-0.164198	-0.425406	-0.365003	0.00805406	-0.136361	0.390076	0.18428	-0.11318	-0.277589		0.183587	-0.239729	-0.258145	-0.157151	-0.144414	1.41139	0.581925	1.02157	1.3333												1	0.679648	0.275319	0.570719	-0.0798078	-0.172675	0.797048	-0.0343632
Q1/2006	3.32863	5.01592				0.143954	0.622021				1	0.0265965	-0.164198	-0.425406	-0.365003	-0.160417	0.418041	0.17686	-0.135987	-0.269208		0.189706	-0.022227	-0.110663	-0.133056	-0.0818193	0.549518	1.0143	1.02957	1.32595												1	0.487207	0.679648	0.275319	0.570719	-0.184022	0.803114	-0.0527855
Q2/2006	3.90353	4.5367				0.272832	0.431552				1	0.143954	0.0265965	-0.164198	-0.425406	-0.190596	0.408106	0.137565	-0.0874989	-0.22816		0.230012	-0.0167607	-0.0281531	-0.0870331	-0.0794723	1.66878	2.46978	1.05369	1.35071												1	0.622021	0.487207	0.679648	0.275319	-0.174177	0.809048	-0.0388287
Q3/2006	0.0810357	3.66968				-0.58408	0.0869517				1	0.272832	0.143954	0.0265965	-0.164198	-0.144747	0.401183	0.133448	-0.0919784	-0.256199		0.186453	0.02354	-0.142497	-0.13553	-0.117991	7.34659	4.32274	1.15728	1.39942												1	0.431552	0.622021	0.487207	0.679648	-0.173105	0.778018	-0.0396163
Q4/2006	2.96181	1.83277				0.0617213	-0.643145				1	-0.58408	0.272832	0.143954	0.0265965	-0.134557	0.42498	0.130166	-0.0971407	-0.244909		0.213096	-0.367763	-0.118949	-0.269719	-0.22619	3.67043	1.64945	1.20578	1.41765												1	0.0869517	0.431552	0.622021	0.487207	-0.188684	0.757289	-0.0562157
Q1/2007	3.10124	4.57137				0.0929772	0.445332				1	0.0617213	-0.58408	0.272832	0.143954	-0.157943	0.427581	0.123077	-0.0479329	-0.243947		0.258777	-0.251633	-0.428635	-0.251302	-0.35165	2.36308	3.93382	1.23464	1.45713												1	-0.643145	0.0869517	0.431552	0.622021	-0.206759	0.732179	-0.040251
Q2/2007	3.17502	2.60167				0.109517	-0.337539				1	0.0929772	0.0617213	-0.58408	0.272832	-0.171423	0.420835	0.092791	-0.0245517	-0.24685		0.242224	-0.179576	-0.2965	-0.37467	-0.333503	1.66302	3.90543	1.24531	1.49468												1	0.445332	-0.643145	0.0869517	0.431552	-0.20557	0.693521	-0.0462258
Q3/2007	1.24337	2.12344				-0.323513	-0.527613				1	0.109517	0.0929772	0.0617213	-0.58408	-0.188837	0.399443	0.131993	0.0188269	-0.276293		0.273969	0.0297197	-0.0957028	-0.176164	-0.170806	2.48281	0.46402	1.23702	1.47403												1	-0.337539	0.445332	-0.643145	0.0869517	-0.211482	0.692526	-0.0371452
Q4/2007	1.076	2.84329				-0.361034	-0.241504				1	-0.323513	0.109517	0.0929772	0.0617213	-0.223224	0.396286	0.194736	0.0252224	-0.235743		0.380501	-0.342306	-0.177813	-0.24588	-0.272754	0.00697901	0.155074	1.22178	1.41753												1	-0.527613	-0.337539	0.445332	-0.643145	-0.217171	0.700863	-0.0420878
Q1/2008	1.68165	3.85794				-0.22526	0.161775				1	-0.361034	-0.323513	0.109517	0.0929772	-0.24394	0.382067	0.180927	0.0350113	-0.201992		0.396013	-0.455357	-0.441031	-0.279568	-0.302321	1.05353	0.118166	1.23492	1.39351												1	-0.241504	-0.527613	-0.337539	0.445332	-0.230654	0.714931	-0.036039
Q2/2008	-1.80548	3.43754				-1.00699	-0.00531588				1	-0.22526	-0.361034	-0.323513	0.109517	-0.238841	0.340093	0.214978	0.0483469	-0.171598		0.43182	-0.427499	-0.516686	-0.498635	-0.353678	6.68219	8.49309	1.31675	1.47444												1	0.161775	-0.241504	-0.527613	-0.337539	-0.240323	0.727933	-0.0366189
Q3/2008	-1.39611	4.31654				-0.91522	0.344048				1	-1.00699	-0.22526	-0.361034	-0.323513	-0.226208	0.287512	0.264309	0.0311887	-0.107377		0.475633	-0.551791	-0.394597	-0.471028	-0.439078	2.62822	4.51123	1.34758	1.5198												1	-0.00531588	0.161775	-0.241504	-0.527613	-0.233488	0.739805	-0.0629749
Q4/2008	-5.57223	2.11273				-1.85141	-0.531869				1	-0.91522	-1.00699	-0.22526	-0.361034	-0.231825	0.299991	0.244221	0.0464219	-0.124188		0.466445	-0.717932	-0.619271	-0.413882	-0.460403	25.5649	38.5015	1.60327	1.86738												1	0.344048	-0.00531588	0.161775	-0.241504	-0.251647	0.739026	-0.0678782
Q1/2009	-6.64474	2.73431				-2.09184	-0.28482				1	-1.85141	-0.91522	-1.00699	-0.22526	-0.178401	0.303281	0.215742	0.0795584	-0.081056		0.517526	-0.999206	-0.689486	-0.557319	-0.446444	23.7558	53.8719	1.81962	2.27317												1	-0.531869	0.344048	-0.00531588	0.161775	-0.261988	0.721646	-0.0665626
Q2/2009	-0.545344	0.722892				-0.724499	-1.08427				1	-2.09184	-1.85141	-0.91522	-1.00699	-0.173235	0.248476	0.187081	0.0992657	-0.0561513		0.478672	-1.07368	-0.872059	-0.531428	-0.459205	2.42614	1.40048	1.82718	2.27109												1	-0.28482	-0.531869	0.344048	-0.00531588	-0.244577	0.717018	-0.0928503
Q3/2009	0.641829	1.09233				-0.458363	-0.937437				1	-0.724499	-2.09184	-1.85141	-0.91522	-0.174184	0.238651	0.179105	0.0370216	-0.0611075		0.39367	-0.73436	-0.963753	-0.731563	-0.479303	1.51576	0.00872504	1.83976	2.26039												1	-1.08427	-0.28482	-0.531869	0.344048	-0.258372	0.72062	-0.114405
Q4/2009	2.71812	2.10776				0.00709042	-0.533844				1	-0.458363	-0.724499	-2.09184	-1.85141	-0.172343	0.240756	0.18982	0.0267282	-0.0463379		0.410966	-0.390342	-0.44351	-0.717259	-0.517839	3.14302	5.48306	1.85782	2.26644												1	-0.937437	-1.08427	-0.28482	-0.531869	-0.26373	0.723017	-0.115556
Q1/2010	1.65772	2.1566				-0.230626	-0.514433				1	0.00709042	-0.458363	-0.724499	-2.09184	-0.165663	0.22633	0.14547	-0.0327978	-0.0841235		0.254879	-0.0310015	-0.27576	-0.310551	-0.520877	0.792956	1.67637	1.86419	2.27069												1	-0.533844	-0.937437	-1.08427	-0.28482	-0.256735	0.715033	-0.118274
Q2/2010	2.13586	2.53718				-0.123437	-0.363171				1	-0.230626	0.00709042	-0.458363	-0.724499	-0.200739	0.239983	0.179398	-0.0683804	-0.0794363		0.271564	-0.165918	-0.0956674	-0.291508	-0.310647	0.0359109	0.6974	1.86442	2.27521												1	-0.514433	-0.533844	-0.937437	-1.08427	-0.243368	0.701086	-0.127515
Q3/2010	2.44787	2.66811				-0.0534918	-0.311131				1	-0.123437	-0.230626	0.00709042	-0.458363	-0.171405	0.237152	0.179299	-0.0278066	-0.0452225		0.343422	-0.221498	-0.246004	-0.153499	-0.284063	0.56166	1.05787	1.85736	2.27816												1	-0.363171	-0.514433	-0.533844	-0.937437	-0.261172	0.700635	-0.122769
Q4/2010	2.71111	3.03184				0.00551894	-0.166563				1	-0.0534918	-0.123437	-0.230626	0.00709042	-0.155845	0.229307	0.145907	-0.00159033	-0.060631		0.312992	-0.186185	-0.239974	-0.274334	-0.213901	0.731279	0.958017	1.80658	2.21867												1	-0.311131	-0.363171	-0.514433	-0.533844	-0.278425	0.708034	-0.108407
Q1/2011	4.16175	2.85502				0.330718	-0.23684				1	0.00551894	-0.0534918	-0.123437	-0.230626	-0.193085	0.205172	0.183435	0.00639956	-0.0215118		0.373494	-0.197594	-0.192164	-0.254168	-0.281041	5.55397	7.44704	1.84749	2.22726												1	-0.166563	-0.311131	-0.363171	-0.514433	-0.283991	0.738544	-0.0980487
Q2/2011	0.255307	2.9855				-0.545012	-0.184984				1	0.330718	0.00551894	-0.0534918	-0.123437	-0.234818	0.172013	0.158609	0.0664917	-0.0254115		0.371703	-0.177474	-0.230301	-0.219507	-0.262967	2.68798	1.58292	1.83003	2.1515												1	-0.23684	-0.166563	-0.311131	-0.363171	-0.287477	0.75293	-0.106349
Q3/2011	0.844541	1.4389				-0.41292	-0.799689				1	-0.545012	0.330718	0.00551894	-0.0534918	-0.267301	0.117497	0.181811	0.0492238	-0.055254		0.293278	-0.267983	-0.211164	-0.275396	-0.230679	0.418007	0.660872	1.81207	2.15624												1	-0.184984	-0.23684	-0.166563	-0.311131	-0.288399	0.738485	-0.100818
Q4/2011	1.02199	-1.4667				-0.373141	-1.95454				1	-0.41292	-0.545012	0.330718	0.00551894	-0.256576	0.136361	0.183368	0.0739281	-0.0399267		0.35373	-0.388591	-0.381903	-0.27744	-0.293217	0.00474956	0.127108	1.81011	2.15704												1	-0.799689	-0.184984	-0.23684	-0.166563	-0.28716	0.724115	-0.10607
Q1/2012	0.260756	-0.844506				-0.543791	-1.70724				1	-0.373141	-0.41292	-0.545012	0.330718	-0.247524	0.126261	0.219629	0.0545658	-0.0421886		0.358267	-0.429017	-0.438777	-0.405997	-0.336238	0.262122	0.857191	1.81221	2.16205												1	-1.95454	-0.799689	-0.184984	-0.23684	-0.294746	0.736059	-0.0979113
Q2/2012	-0.297048	0.955611				-0.668837	-0.991776				1	-0.543791	-0.373141	-0.41292	-0.545012	-0.221198	0.0737684	0.248616	0.034216	-0.00266962		0.353931	-0.366754	-0.383182	-0.396429	-0.367516	1.81582	1.80668	1.81368	2.17041												1	-1.70724	-1.95454	-0.799689	-0.184984	-0.312753	0.730295	-0.0965389
Q3/2012	0.584063	3.44482				-0.471313	-0.00242256				1	-0.668837	-0.543791	-0.373141	-0.41292	-0.229508	0.0746718	0.252178	0.04304	0.0572005		0.42709	-0.456262	-0.395112	-0.393069	-0.403332	0.0045076	0.0919606	1.81125	2.16494												1	-0.991776	-1.70724	-1.95454	-0.799689	-0.312035	0.722579	-0.0910777
Q4/2012	-0.221284	5.12209				-0.651853	0.664219				1	-0.471313	-0.668837	-0.543791	-0.373141	-0.215805	0.0707939	0.24199	0.0587948	-0.00336218		0.368217	-0.441741	-0.476992	-0.359136	-0.388978	0.878461	1.37505	1.80104	2.16804												1	-0.00242256	-0.991776	-1.70724	-1.95454	-0.312317	0.73929	-0.0692543
Q1/2013	-0.129203	7.30297				-0.63121	1.53103				1	-0.651853	-0.471313	-0.668837	-0.543791	-0.197708	0.0778143	0.228205	0.0639228	-0.00457757		0.365365	-0.396252	-0.398627	-0.440077	-0.357019	1.0985	1.49599	1.80302	2.1742												1	0.664219	-0.00242256	-0.991776	-1.70724	-0.30557	0.712564	-0.0636988
Q2/2013	2.71728	4.53996				0.00690217	0.432849				1	-0.63121	-0.651853	-0.471313	-0.668837	-0.194917	0.0596657	0.249576	0.0928967	-0.0370676		0.36507	-0.414256	-0.404364	-0.376385	-0.440551	3.5295	3.98399	1.82505	2.19925												1	1.53103	0.664219	-0.00242256	-0.991776	-0.32974	0.717282	-0.0759904
Q3/2013	-0.0300239	3.77797				-0.608977	0.129989				1	0.00690217	-0.63121	-0.651853	-0.471313	-0.244368	0.0682146	0.183078	0.109642	0.00867403		0.369608	-0.435016	-0.420253	-0.359111	-0.363302	0.602174	1.201	1.82782	2.20726												1	0.432849	1.53103	0.664219	-0.00242256	-0.318536	0.688949	-0.0799504
Q4/2013	1.66368	1.90735				-0.229288	-0.613501				1	-0.608977	0.00690217	-0.63121	-0.651853	-0.185238	0.0760931	0.191203	0.125423	-0.020854		0.371865	-0.295832	-0.34764	-0.357855	-0.340276	0.0881129	0.245115	1.81647	2.20488												1	0.129989	0.432849	1.53103	0.664219	-0.328438	0.684209	-0.0762128
Q1/2014	0.301136	-0.666962				-0.534739	-1.63668				1	-0.229288	-0.608977	0.00690217	-0.63121	-0.2002	0.0675104	0.17023	0.107184	-0.027123		0.317801	-0.301485	-0.310158	-0.352442	-0.336239	1.08263	0.784045	1.82105	2.20324												1	-0.613501	0.129989	0.432849	1.53103	-0.316596	0.701518	-0.0592224
Q2/2014	0.991468	0.494498				-0.379983	-1.17505				1	-0.534739	-0.229288	-0.608977	0.00690217	-0.20949	0.0304853	0.148442	0.0942821	-0.0234455		0.249764	-0.317405	-0.325044	-0.341927	-0.379691	0.0779219	1.69181e-06	1.80735	2.18566												1	-1.63668	-0.613501	0.129989	0.432849	-0.301997	0.692084	-0.0891627
Q3/2014	1.78278	0.514966				-0.20259	-1.16691				1	-0.379983	-0.534739	-0.229288	-0.608977	-0.199945	0.0414135	0.20996	0.0757033	-0.00524571		0.321831	-0.342119	-0.305884	-0.281524	-0.294964	0.38739	0.169793	1.74615	2.15577												1	-1.17505	-1.63668	-0.613501	0.129989	-0.301091	0.712062	-0.102865
Q4/2014	0.438157	-0.492798				-0.504022	-1.56746				1	-0.20259	-0.379983	-0.534739	-0.229288	-0.200811	0.0231888	0.261297	0.0928919	-0.0138375		0.36354	-0.351297	-0.333174	-0.310972	-0.300633	0.464132	0.823143	1.71722	2.14977												1	-1.16691	-1.17505	-1.63668	-0.613501	-0.278142	0.706247	-0.0673997
Q1/2015	1.67997	-0.65239				-0.225638	-1.63089				1	-0.504022	-0.20259	-0.379983	-0.534739	-0.207169	0.0759924	0.271316	0.0459322	-0.00540503		0.387836	-0.315	-0.289791	-0.311536	-0.281764	0.158902	0.0626848	1.69705	2.12144												1	-1.56746	-1.16691	-1.17505	-1.63668	-0.250893	0.708189	-0.0549856
Q2/2015	-0.0878169	1.86285				-0.621932	-0.631188				1	-0.225638	-0.504022	-0.20259	-0.379983	-0.176938	0.111992	0.308379	0.0603488	0.00521313		0.485934	-0.371844	-0.375107	-0.312884	-0.306707	1.24454	1.97727	1.69319	2.1072												1	-1.63089	-1.56746	-1.16691	-1.17505	-0.256775	0.684327	-0.0733656
Q3/2015	1.516	1.08				-0.262396	-0.942335				1	-0.621932	-0.225638	-0.504022	-0.20259	-0.162479	0.116798	0.339012	0.0338666	0.0186548		0.508331	-0.332462	-0.319637	-0.343194	-0.313617	0.097686	0.0522048	1.67104	2.10414												1	-0.631188	-1.63089	-1.56746	-1.16691	-0.25685	0.69357	-0.0613873
Q4/2015	1.00015	0.588706				-0.378037	-1.1376				1	-0.262396	-0.621932	-0.225638	-0.504022	-0.136166	0.144474	0.327812	0.0383561	0.0026848		0.513326	-0.38796	-0.429196	-0.343648	-0.346766	0.00195925	0.0194581	1.67099	2.10313												1	-0.942335	-0.631188	-1.63089	-1.56746	-0.255706	0.703366	-0.051581
Q1/2016	2.61555	0.135816				-0.0159015	-1.31761				1	-0.378037	-0.262396	-0.621932	-0.225638	-0.168561	0.130247	0.303051	0.0067109	0.0171828		0.457192	-0.305369	-0.302693	-0.350588	-0.33761	1.66733	2.05943	1.67672	2.11751												1	-1.1376	-0.942335	-0.631188	-1.63089	-0.247671	0.68649	-0.037337
Q2/2016	-0.916203	2.55387				-0.807637	-0.356537				1	-0.0159015	-0.378037	-0.262396	-0.621932	-0.12828	0.160921	0.302962	0.00328864	0.022248		0.48942	-0.260069	-0.335346	-0.318809	-0.371791	5.96619	3.77996	1.67003	2.08244												1	-1.31761	-1.1376	-0.942335	-0.631188	-0.255979	0.690528	-0.0460604
Q3/2016	0.793045	1.34111				-0.424464	-0.838555				1	-0.807637	-0.0159015	-0.378037	-0.262396	-0.0796933	0.143124	0.268848	-0.0155909	0.0226843		0.419065	-0.199619	-0.182029	-0.311827	-0.297037	1.00598	0.32311	1.65479	2.05077												1	-0.356537	-1.31761	-1.1376	-0.942335	-0.270578	0.703513	-0.0731082
Q4/2016	2.42408	2.05971				-0.0588246	-0.552942				1	-0.424464	-0.807637	-0.0159015	-0.378037	-0.0711092	0.158989	0.265651	-0.0292741	0.0211361		0.416501	-0.360668	-0.333723	-0.244826	-0.319348	1.81295	1.35056	1.41282	1.74491												1	-0.838555	-0.356537	-1.31761	-1.1376	-0.264091	0.700069	-0.0629654
Q1/2017	3.07645	1.97406				0.0874208	-0.586984				1	-0.0588246	-0.424464	-0.807637	-0.0159015	-0.0253447	0.153317	0.254895	-0.0115862	-0.0234355		0.373189	-0.132827	-0.217904	-0.168893	-0.224035	0.965261	1.93025	1.13308	1.19228												1	-0.552942	-0.838555	-0.356537	-1.31761	-0.280491	0.696959	-0.0787776
Q2/2017	2.6254	0.993548				-0.0136948	-0.976697				1	0.0874208	-0.0588246	-0.424464	-0.807637	-0.0219436	0.116132	0.276172	0.0191489	-0.0442428		0.36721	-0.000432946	-0.0368581	-0.20621	-0.208795	0.00349969	0.75742	1.09916	1.18382												1	-0.586984	-0.552942	-0.838555	-0.356537	-0.294305	0.695256	-0.0652654
Q3/2017	2.71895	2.03219				0.00727837	-0.563881				1	-0.0136948	0.0874208	-0.0588246	-0.424464	-0.00698417	0.111207	0.308877	-0.00697629	-0.0501494		0.362958	0.0401922	0.0198024	-0.0542234	-0.160194	0.0215565	0.558094	1.07771	1.19105												1	-0.976697	-0.586984	-0.552942	-0.838555	-0.288352	0.706006	-0.0613293
Q4/2017	2.69778	2.32983				0.00253111	-0.445581				1	0.00727837	-0.0136948	0.0874208	-0.0588246	-0.0265013	0.0980055	0.311926	0.00196028	-0.0742059		0.337686	-0.0255232	-0.00440439	-0.0154869	-0.0401354	0.0156611	0.036224	1.03137	1.11731												1	-0.563881	-0.976697	-0.586984	-0.552942	-0.286896	0.703806	-0.0591292
[truncated: 12 more columns]

## Sheet: Forecast&Persistence_DE
Q1/1960 !Q mag=bil	Quarterly Real GDP Growth (Annualized)	Quarterly GDP Deflator Growth (Annualized)				Standardized Series										Coefficients AR(4) on Real GDP Growth																															Coefficients AR(4) on Inflation Rate (GDP Deflator)
.DESC						Real GDPGrowth	Inflation (GDP Deflator)									Matrix bm in the Gauss code																															Matrix bm in the Gauss code
.T1
.TN																							Forecast
.LSOURCE											Regressors					Time-Varying Coefficients Estimated						Persistence	One-period ahead	Two-periods ahead	Three-periods ahead	Four-periods ahead	Squared Forecasting Error	Squared Forecasting Error	RMSFE	RMSFE												Regressors					Time-Varying Coefficients Estimated
.DTLM											constant	lag1	lag2	lag3	lag4	intercept	lag1	lag2	lag3	lag4			t+1 with information up to t	t+2 with information up to t	t+3 with information up to t	t+4 with information up to t	One-period ahead	Four-period ahead	One-period ahead	Four-period ahead												constant	lag1	lag2	lag3	lag4	intercept	lag1	lag2
Q1/1960	#N/A	#N/A				#N/A	#N/A				1											#N/A							#N/A	#N/A												1
Q2/1960	7.05602	0.420207				1.07202	-1.20672				1											#N/A							#N/A	#N/A												1
Q3/1960	13.5931	-0.398964				2.58691	-1.54762				1											#N/A							#N/A	#N/A												1
Q4/1960	4.06752	-0.89732				0.379478	-1.75501				1											#N/A							#N/A	#N/A												1
Q1/1961	4.02658	-2.11708				0.369989	-2.26262				1											#N/A							#N/A	#N/A												1
Q2/1961	-2.16318	-1.05427				-1.0644	-1.82033				1	0.369989	0.379478	2.58691	1.07202	0.283611	-0.0962024	-0.0678574	-0.00361761	0.324693		0.157015	0.560985	#N/A	#N/A	#N/A	49.1955	#N/A	#N/A	#N/A	1											1	-2.26262	-1.75501	-1.54762	-1.20672	-0.118914	0.53709	-0.04736
Q3/1961	8.12693	0.0053635				1.32019	-1.37936				1	-1.0644	0.369989	0.379478	2.58691	0.249927	-0.118608	-0.0531841	0.0201036	0.303601		0.151913	1.14951	1.04311	#N/A	#N/A	0.542451	#N/A	#N/A	#N/A	1											1	-1.82033	-2.26262	-1.75501	-1.54762	-0.106716	0.493555	-0.0503238
Q4/1961	1.81828	1.09888				-0.141752	-0.924282				1	1.32019	-1.0644	0.369989	0.379478	0.254278	-0.159025	-0.0905174	-0.00671909	0.329639		0.0733774	0.263286	0.292842	0.267069	#N/A	3.05496	#N/A	#N/A	#N/A	1											1	-1.37936	-1.82033	-2.26262	-1.75501	-0.113963	0.494283	-0.0751653
Q1/1962	5.85042	2.74533				0.792638	-0.239104				1	-0.141752	1.32019	-1.0644	0.369989	0.186742	-0.145571	-0.150566	-0.0389217	0.34984		0.0147813	0.179467	0.222024	0.244988	0.305238	7.00127	4.42369	#N/A	#N/A	1											1	-0.924282	-1.37936	-1.82033	-2.26262	-0.0959182	0.518032	-0.103731
Q2/1962	4.1478	1.13569				0.39808	-0.908962				1	0.792638	-0.141752	1.32019	-1.0644	0.193863	-0.136019	-0.145413	-0.0218888	0.277167		-0.026154	-0.217251	-0.241792	-0.164599	-0.0947488	7.05069	4.52279	#N/A	#N/A	2											1	-0.239104	-0.924282	-1.37936	-1.82033	-0.110348	0.536988	-0.0967975
Q3/1962	9.4679	1.08801				1.63094	-0.928808				1	0.39808	0.792638	-0.141752	1.32019	0.175603	-0.188306	-0.122804	-0.0269325	0.309178		-0.0288643	0.415294	0.477168	0.66229	0.693774	27.5186	16.3548	#N/A	#N/A	2											1	-0.908962	-0.239104	-0.924282	-1.37936	-0.0837226	0.547761	-0.109764
Q4/1962	-0.865629	0.822644				-0.76371	-1.03924				1	1.63094	0.39808	0.792638	-0.141752	0.126444	-0.196621	-0.104225	-0.019846	0.270507		-0.050185	-0.289799	-0.0166599	0.103912	0.0701624	4.18222	12.9483	#N/A	#N/A	2											1	-0.928808	-0.908962	-0.239104	-0.924282	-0.0722228	0.55638	-0.109328
Q1/1963	-14.2427	1.59823				-3.86365	-0.716474				1	-0.76371	1.63094	0.39808	0.792638	0.104174	-0.154971	-0.084547	-0.0103267	0.259092		0.00924649	0.285892	0.219954	0.362086	0.334791	320.638	328.239	#N/A	#N/A	2											1	-1.03924	-0.928808	-0.908962	-0.239104	-0.0835873	0.550972	-0.0921714
Q2/1963	17.5471	0.551157				3.50317	-1.15222				1	-3.86365	-0.76371	1.63094	0.39808	0.110177	-0.161311	-0.106814	-0.0166728	0.25732		-0.0274776	0.890243	0.210736	0.188717	0.221359	127.136	200.559	#N/A	#N/A	3											1	-0.716474	-1.03924	-0.928808	-0.908962	-0.0676024	0.547835	-0.0809056
Q3/1963	13.6417	0.432442				2.59816	-1.20162				1	3.50317	-3.86365	-0.76371	1.63094	0.142472	-0.180844	-0.100213	-0.0186115	0.243267		-0.0564014	0.307097	0.811667	0.477794	0.513345	97.7433	80.9371	#N/A	#N/A	3											1	-1.15222	-0.716474	-1.03924	-0.928808	-0.0485509	0.549057	-0.0805786
Q4/1963	1.9312	3.2161				-0.115585	-0.0431899				1	2.59816	3.50317	-3.86365	-0.76371	0.186532	-0.197896	-0.111182	-0.0560212	0.200625		-0.164474	-0.653896	-0.378004	-0.247944	-0.18851	5.3961	0.0990301	#N/A	#N/A	3											1	-1.20162	-1.15222	-0.716474	-1.03924	-0.0361466	0.561796	-0.067285
Q1/1964	5.46611	1.32094				0.703581	-0.83187				1	-0.115585	2.59816	3.50317	-3.86365	0.194765	-0.211005	-0.0988262	-0.0826949	0.201989		-0.190537	-1.10772	-0.944332	-0.825041	-0.945561	61.0935	50.6442	#N/A	#N/A	3											1	-0.0431899	-1.20162	-1.15222	-0.716474	-0.0344927	0.5481	-0.0789027
Q2/1964	4.85749	0.985417				0.562542	-0.971501				1	0.703581	-0.115585	2.59816	3.50317	0.206023	-0.179701	-0.0749577	-0.0417456	0.204		-0.0924048	0.694437	0.932669	1.00339	1.17605	0.323947	7.00888	#N/A	#N/A	4											1	-0.83187	-0.0431899	-1.20162	-1.15222	-0.0247186	0.588394	-0.0694895
Q3/1964	4.13493	1.64521				0.395099	-0.696923				1	0.562542	0.703581	-0.115585	2.59816	0.215981	-0.205429	-0.0529442	-0.103668	0.257216		-0.104825	0.743439	0.563342	0.641796	0.650848	2.25955	1.21798	#N/A	#N/A	4											1	-0.971501	-0.83187	-0.0431899	-1.20162	-0.0191772	0.579867	-0.0315407
Q4/1964	5.40466	1.82509				0.689342	-0.622067				1	0.395099	0.562542	0.703581	-0.115585	0.224356	-0.192367	-0.00411271	-0.0719957	0.2333		-0.0351754	0.0684174	-0.0691954	-0.000214559	0.0354267	7.17944	7.96262	#N/A	#N/A	4											1	-0.696923	-0.971501	-0.83187	-0.0431899	-0.0236895	0.563051	-0.0351425
Q1/1965	6.49327	2.01381				0.94161	-0.54353				1	0.689342	0.395099	0.562542	0.703581	0.190145	-0.161324	-0.0344446	-0.0769728	0.248769		-0.0239724	0.197057	0.333215	0.31349	0.278375	10.323	8.19121	#N/A	#N/A	4											1	-0.622067	-0.696923	-0.971501	-0.83187	-0.0317527	0.564733	-0.0276937
Q2/1965	6.263	1.81011				0.888248	-0.628302				1	0.94161	0.689342	0.395099	0.562542	0.191335	-0.160321	0.0107212	-0.0936907	0.22247		-0.0208203	0.135898	0.244142	0.262771	0.222869	10.5403	8.24427	#N/A	#N/A	5											1	-0.54353	-0.622067	-0.696923	-0.971501	-0.0107975	0.557227	-0.00552182
Q3/1965	2.65467	1.58724				0.0520705	-0.721049				1	0.888248	0.94161	0.689342	0.395099	0.183176	-0.0997558	0.0537625	-0.121942	0.257895		0.0899593	0.163026	0.202956	0.189199	0.259688	0.22925	0.802677	#N/A	#N/A	5											1	-0.628302	-0.54353	-0.622067	-0.696923	-0.0194534	0.567587	-0.0277689
Q4/1965	2.38667	2.7348				-0.0100355	-0.243484				1	0.0520705	0.888248	0.94161	0.689342	0.173942	-0.122193	0.0536912	-0.0377509	0.294936		0.188683	0.383035	0.277624	0.225392	0.307532	2.8771	1.87796	#N/A	#N/A	5											1	-0.721049	-0.628302	-0.54353	-0.622067	-0.000950072	0.564606	0.00555254
Q1/1966	7.19852	2.6133				1.10504	-0.294049				1	-0.0100355	0.0520705	0.888248	0.94161	0.189761	-0.114603	0.0450232	-0.0552461	0.27694		0.152114	0.404952	0.374116	0.298768	0.354124	9.12686	10.5002	#N/A	#N/A	5											1	-0.243484	-0.721049	-0.628302	-0.54353	0.0132954	0.553274	0.0053288
Q2/1966	1.22805	3.27145				-0.278529	-0.0201549				1	1.10504	-0.0100355	0.0520705	0.888248	0.224884	-0.115015	0.0597718	-0.0424988	0.314873		0.217131	0.37466	0.386015	0.408804	0.377493	7.94494	8.01401	#N/A	#N/A	6											1	-0.294049	-0.243484	-0.721049	-0.628302	0.000605782	0.5343	0.0218881
Q3/1966	0.490405	3.85619				-0.449468	0.223187				1	-0.278529	1.10504	-0.0100355	0.0520705	0.254187	-0.086403	0.0848014	-0.0489631	0.298835		0.248271	0.388014	0.264665	0.17873	0.144973	13.0606	6.58009	#N/A	#N/A	6											1	-0.0201549	-0.294049	-0.243484	-0.721049	0.00486692	0.535997	0.0282966
Q4/1966	-6.29544	3.34825				-2.02199	0.0118047				1	-0.449468	-0.278529	1.10504	-0.0100355	0.24606	-0.136032	0.0439511	-0.0269937	0.245722		0.126647	0.262666	0.139937	0.166715	0.161506	97.1977	88.7809	#N/A	#N/A	6											1	0.223187	-0.0201549	-0.294049	-0.243484	0.0104023	0.537247	0.0187826
Q1/1967	-1.99589	1.62328				-1.02563	-0.706051				1	-2.02199	-0.449468	-0.278529	1.10504	0.283369	-0.123446	0.0741114	-0.0120911	0.265835		0.204409	0.796792	0.469626	0.618864	0.553554	61.8461	46.4387	#N/A	#N/A	6											1	0.0118047	0.223187	-0.0201549	-0.294049	0.00294972	0.53286	0.0283844
Q2/1967	-1.25228	2.02779				-0.85331	-0.537711				1	-1.02563	-2.02199	-0.449468	-0.278529	0.274693	-0.146223	0.0675148	-0.00109707	0.308553		0.228748	0.202702	-0.0334526	0.137413	0.11035	20.7659	17.2926	#N/A	#N/A	7											1	-0.706051	0.0118047	0.223187	-0.0201549	-0.000567251	0.549404	-0.00226149
Q3/1967	9.54361	3.87415				1.64848	0.230662				1	-0.85331	-1.02563	-2.02199	-0.449468	0.219471	-0.136683	0.0521772	0.00741169	0.301204		0.22411	0.132221	0.0393415	0.251514	0.130474	42.8116	42.9104	#N/A	#N/A	7											1	-0.537711	-0.706051	0.0118047	0.223187	0.0123048	0.540459	-0.00133345
Q4/1967	5.11093	4.51556				0.621273	0.49759				1	1.64848	-0.85331	-1.02563	-2.02199	0.247378	-0.129277	0.0597296	-0.0028053	0.286102		0.213749	-0.592319	-0.459759	-0.340141	-0.297309	27.4258	15.7126	#N/A	#N/A	7											1	0.230662	-0.537711	-0.706051	0.0118047	0.0207443	0.518036	-0.0122176
Q1/1968	4.65404	4.61211				0.515394	0.537771				1	0.621273	1.64848	-0.85331	-1.02563	0.244693	-0.157874	0.0582567	-0.00299019	0.26936		0.166753	-0.0310669	0.131373	-0.0260374	0.0104017	5.56073	4.74879	#N/A	#N/A	7											1	0.49759	0.230662	-0.537711	-0.706051	0.0289609	0.513994	0.00404228
Q2/1968	3.0971	4.3271				0.154596	0.419162				1	0.515394	0.621273	1.64848	-0.85331	0.242369	-0.140182	0.0881908	0.00743597	0.310758		0.266203	-0.0280044	0.051014	-0.0537423	-0.0569992	0.620892	0.833728	#N/A	#N/A	8											1	0.537771	0.49759	0.230662	-0.537711	0.0287928	0.520042	-0.00516425
Q3/1968	8.68579	3.97182				1.4497	0.271308				1	0.154596	0.515394	0.621273	1.64848	0.254672	-0.130319	0.106809	0.0760321	0.367399		0.419921	0.942462	0.808647	0.677007	0.735468	4.79104	9.49919	#N/A	#N/A	8											1	0.419162	0.537771	0.49759	0.230662	0.0374377	0.51398	0.00306578
Q4/1968	5.99262	5.58731				0.825592	0.943605				1	1.4497	0.154596	0.515394	0.621273	0.269242	-0.110749	0.0934427	0.0914681	0.346485		0.420646	0.385539	0.415805	0.323439	0.308222	3.60598	4.98443	#N/A	#N/A	8											1	0.271308	0.419162	0.537771	0.49759	0.0453184	0.502227	-0.00132073
Q1/1969	9.94121	3.99928				1.74062	0.282736				1	0.825592	1.4497	0.154596	0.515394	0.251231	-0.117421	0.114939	0.090067	0.326497		0.414083	0.503115	0.554724	0.502258	0.428299	28.5173	32.0697	5.77592	#N/A	8											1	0.943605	0.271308	0.419162	0.537771	0.0441696	0.515085	-0.00769523
Q2/1969	5.09971	4.95851				0.618672	0.681926				1	1.74062	0.825592	1.4497	0.154596	0.256671	-0.153483	0.129681	0.167736	0.342457		0.486391	0.392686	0.468093	0.429999	0.362086	0.950991	1.22597	5.6439	#N/A												1	0.282736	0.943605	0.271308	0.419162	0.039479	0.505419	0.000346982
Q3/1969	8.50204	5.4705				1.40712	0.894995				1	0.618672	1.74062	0.825592	1.4497	0.266285	-0.138492	0.107977	0.127319	0.375171		0.471975	1.01755	1.05707	0.801776	0.811017	2.82603	6.61682	5.65022	#N/A												1	0.681926	0.282736	0.943605	0.271308	0.0581766	0.506406	-0.0102452
Q4/1969	6.10022	5.0038				0.850527	0.700772				1	1.40712	0.618672	1.74062	0.825592	0.294095	-0.141926	0.0816828	0.107702	0.367672		0.415132	0.635941	0.723517	0.720047	0.525756	0.857467	1.96412	5.64414	5.67947												1	0.894995	0.681926	0.282736	0.943605	0.0507373	0.516018	-0.016773
Q1/1970	-6.43412	5.47982				-2.05413	0.89887				1	0.850527	1.40712	0.618672	1.74062	0.304416	-0.163684	0.120353	0.0965533	0.316678		0.369901	0.945502	1.02539	1.00776	0.945193	167.552	167.517	6.07236	6.11172												1	0.700772	0.894995	0.681926	0.282736	0.042358	0.502565	-0.000226118
Q2/1970	15.5953	5.45531				3.05087	0.888672				1	-2.05413	0.850527	1.40712	0.618672	0.278911	-0.179174	0.167576	0.0800786	0.25735		0.325831	1.06138	0.583799	0.57953	0.566504	73.7049	114.933	6.24151	6.38776												1	0.89887	0.700772	0.894995	0.681926	0.039482	0.503461	0.0247405
Q3/1970	7.40243	3.23806				1.15229	-0.0340479				1	3.05087	-2.05413	0.850527	1.40712	0.319097	-0.141193	0.0963721	0.063999	0.262767		0.281946	0.114552	0.174747	0.850376	0.881451	20.0536	1.366	6.2228	6.35099												1	0.888672	0.89887	0.700772	0.894995	0.0424907	0.514172	0.00873072
Q4/1970	3.37614	5.22304				0.21926	0.792013				1	1.15229	3.05087	-2.05413	0.850527	0.275281	-0.157563	0.136979	0.086665	0.231884		0.297965	0.530829	0.68897	0.479854	0.59612	1.80768	2.64469	6.21683	6.32559												1	-0.0340479	0.888672	0.89887	0.700772	0.0651681	0.520682	0.0232458
Q1/1971	-7.75918	6.12712				-2.36119	1.16825				1	0.21926	1.15229	3.05087	-2.05413	0.290229	-0.151154	0.128393	0.0488591	0.205921		0.232019	0.131107	0.137566	-0.111646	-0.22142	115.668	85.2608	5.67835	5.69385												1	0.792013	-0.0340479	0.888672	0.89887	0.0794889	0.543414	0.034127
Q2/1971	8.30769	5.24929				1.36208	0.802936				1	-2.36119	0.21926	1.15229	3.05087	0.300508	-0.148536	0.0807889	0.0227399	0.203518		0.158511	1.31605	0.983103	1.13363	1.21026	0.0394413	0.429206	5.31713	5.11526												1	1.16825	0.792013	-0.0340479	0.888672	0.0686429	0.552654	0.0485329
Q3/1971	6.86097	4.0713				1.02682	0.312709				1	1.36208	-2.36119	0.21926	1.15229	0.277093	-0.133214	0.0489577	0.0244422	0.261373		0.201559	0.286584	0.153768	0.406457	0.428709	10.2036	6.66158	5.05335	4.88311												1	0.802936	1.16825	0.792013	-0.0340479	0.0722412	0.558334	0.0417168
Q4/1971	-0.336869	3.30984				-0.641177	-0.00417875				1	1.02682	1.36208	-2.36119	0.21926	0.245403	-0.102037	0.0309373	0.0376284	0.246375		0.212904	0.14794	0.305195	0.374921	0.406571	11.5957	20.4422	5.07248	4.94778												1	0.312709	0.802936	1.16825	0.792013	0.0690145	0.594728	0.0380214
Q1/1972	0.404205	6.14455				-0.469444	1.1755				1	-0.641177	1.02682	1.36208	-2.36119	0.267773	-0.0889056	0.0408613	0.0701453	0.253781		0.275882	-0.13695	-0.268411	-0.333394	-0.193378	2.05865	1.41919	4.88725	4.78981												1	-0.00417875	0.312709	0.802936	1.16825	0.0869522	0.595702	0.0579433
Q2/1972	6.47924	2.4527				0.938359	-0.360884				1	-0.469444	-0.641177	1.02682	1.36208	0.289313	-0.0960198	0.0417896	0.0717165	0.262448		0.279934	0.738709	0.671445	0.651587	0.699462	0.742253	1.06275	4.88859	4.77037												1	1.1755	-0.00417875	0.312709	0.802936	0.0861244	0.599517	0.0310563
Q3/1972	9.23498	3.75325				1.57696	0.180348				1	0.938359	-0.469444	-0.641177	1.02682	0.285664	-0.0783375	0.0323305	0.0816647	0.279834		0.315492	0.431955	0.422268	0.418094	0.429162	24.4136	24.5328	4.95889	4.84613												1	-0.360884	1.1755	-0.00417875	0.312709	0.110715	0.608221	0.0304693
Q4/1972	6.16779	5.07954				0.866185	0.732294				1	1.57696	0.938359	-0.469444	-0.641177	0.234665	-0.073329	0.0174527	0.0546563	0.284204		0.282984	-0.072479	0.0644027	0.077695	0.0857126	16.4072	11.343	4.98788	4.85702												1	0.180348	-0.360884	1.1755	-0.00417875	0.116035	0.605371	0.0151864
Q1/1973	5.49301	4.6781				0.709814	0.56523				1	0.866185	1.57696	0.938359	-0.469444	0.237577	-0.0912535	0.0134107	0.0867168	0.303564		0.312438	0.118548	0.185371	0.239848	0.229273	6.50996	4.30006	4.97592	4.84449												1	0.732294	0.180348	-0.360884	1.1755	0.114995	0.620682	0.00116183
Q2/1973	2.94465	6.06835				0.119267	1.14379				1	0.709814	0.866185	1.57696	0.938359	0.261609	-0.119511	-0.022436	0.0494205	0.294981		0.202455	0.512077	0.659977	0.572683	0.566817	2.87329	3.7299	4.95179	4.8299												1	0.56523	0.732294	0.180348	-0.360884	0.109985	0.639091	0.024404
Q3/1973	1.30871	7.57532				-0.259838	1.77093				1	0.119267	0.709814	0.866185	1.57696	0.236426	-0.100477	-0.0854686	0.0290299	0.287618		0.130703	0.642484	0.692467	0.732765	0.640124	15.1613	15.0821	4.99868	4.87588												1	1.14379	0.56523	0.732294	0.180348	0.11041	0.636663	0.0466758
Q4/1973	0.994238	7.87723				-0.332712	1.89657				1	-0.259838	0.119267	0.709814	0.866185	0.176184	-0.0899261	-0.160287	0.00391987	0.256214		0.0099209	0.405144	0.431414	0.45795	0.452784	10.1381	11.4895	5.02133	4.90658												1	1.77093	1.14379	0.56523	0.732294	0.113792	0.61754	0.0389861
Q1/1974	3.36854	7.51046				0.217498	1.74394				1	-0.332712	-0.259838	0.119267	0.709814	0.189476	-0.0328584	-0.162098	-0.00210063	0.215192		0.0181344	0.395023	0.363731	0.345784	0.426032	0.58686	0.809779	4.99468	4.87563												1	1.89657	1.77093	1.14379	0.56523	0.109013	0.607323	0.0322557
Q2/1974	-0.307872	9.39141				-0.634458	2.5267				1	0.217498	-0.332712	-0.259838	0.119267	0.210877	-0.0391554	-0.199395	-0.00504346	0.249855		0.00626114	0.299812	0.256639	0.108075	0.217765	16.2539	13.5245	5.02061	4.89326												1	1.74394	1.89657	1.77093	1.14379	0.142094	0.602305	0.0287656
Q3/1974	1.70056e-05	11.4323				-0.563109	3.37603				1	-0.634458	0.217498	-0.332712	-0.259838	0.173272	-0.0344759	-0.240061	0.00546939	0.244258		-0.0248095	0.0776461	0.0925255	0.0617944	0.0431779	7.64535	6.84494	5.00373	4.8941												1	2.5267	1.74394	1.89657	1.77093	0.121675	0.613313	0.0486261
Q4/1974	-5.08299	11.6318				-1.74102	3.45907				1	-0.563109	-0.634458	0.217498	-0.332712	0.17975	0.00521923	-0.223718	-0.0214618	0.207622		-0.0323381	0.245004	0.242826	0.0632461	0.073418	73.4487	61.3055	4.92901	4.80558												1	3.37603	2.5267	1.74394	1.89657	0.122756	0.5833	0.0241193
Q1/1975	-2.31471	9.00518				-1.09951	2.36597				1	-1.74102	-0.563109	-0.634458	0.217498	0.137075	0.0427	-0.207214	0.032522	0.185034		0.0530417	0.199028	0.36578	0.195916	0.242782	31.3997	33.5513	4.83153	4.7635												1	3.45907	3.37603	2.5267	1.74394	0.143977	0.584091	0.0250302
Q2/1975	-2.01287	5.95427				-1.02957	1.09632				1	-1.09951	-1.74102	-0.563109	-0.634458	0.128556	0.0641686	-0.186862	-0.00315121	0.198191		0.0723463	0.259364	0.370629	0.0072052	-0.0463215	30.9367	18.0027	4.86431	4.76582												1	2.36597	3.45907	3.37603	2.5267	0.141128	0.566893	0.0089399
Q3/1975	4.32774	7.04763				0.439779	1.55133				1	-1.02957	-1.09951	-1.74102	-0.563109	0.122952	0.0544187	-0.142867	-0.0187014	0.176618		0.0694683	0.157113	0.24454	-0.0491558	-0.024216	1.48786	4.00904	4.72971	4.63653												1	1.09632	2.36597	3.45907	3.37603	0.157273	0.556029	0.00494238
Q4/1975	7.78399	6.58017				1.24072	1.35679				1	0.439779	-1.02957	-1.09951	-1.74102	0.110581	0.0608632	-0.14228	-0.0803541	0.141997		-0.019774	0.124965	-0.00833994	-0.245808	-0.257498	23.1819	41.7986	4.71567	4.72362												1	1.55133	1.09632	2.36597	3.45907	0.148389	0.571353	0.0130683
Q1/1976	3.57796	4.07906				0.26603	0.315939				1	1.24072	0.439779	-1.02957	-1.09951	0.113362	0.0484534	-0.0923372	-0.117344	0.140804		-0.0204238	0.0988682	-0.017783	-0.0748869	-0.151643	0.520338	3.24852	4.69894	4.71866												1	1.35679	1.55133	1.09632	2.36597	0.13046	0.55701	-0.00108071
Q2/1976	5.89836	4.00945				0.803748	0.286969				1	0.26603	1.24072	0.439779	-1.02957	0.0394828	0.00832918	-0.0715024	-0.147903	0.103649		-0.107428	-0.218773	-0.192984	-0.0898151	-0.0647095	19.4697	14.0446	4.7612	4.7622												1	0.315939	1.35679	1.55133	1.09632	0.176056	0.527045	0.00302187
Q3/1976	0.119458	5.12909				-0.53543	0.752915				1	0.803748	0.26603	1.24072	0.439779	0.0694891	-0.037493	-0.0654963	-0.09952	0.109045		-0.0934644	-0.0535902	-0.119285	0.0112139	0.160051	4.32334	9.00708	4.75967	4.76059												1	0.286969	0.315939	1.35679	1.55133	0.169804	0.530533	0.0107523
Q4/1976	7.33859	7.0374				1.1375	1.54707				1	-0.53543	0.803748	0.26603	1.24072	0.0597466	-0.0165532	-0.0453113	-0.068982	0.0517148		-0.0791317	0.0780029	0.127674	0.143384	0.29482	20.9032	13.2233	4.81611	4.78755												1	0.752915	0.286969	0.315939	1.35679	0.157072	0.536593	0.00266633
Q1/1977	3.40127	6.43081				0.225084	1.29463				1	1.1375	-0.53543	0.803748	0.26603	0.0194479	-0.033151	-0.0392124	-0.0408741	0.101377		-0.0118607	-0.00314913	0.04103	0.0172323	0.109137	0.969997	0.25034	4.7259	4.68255												1	1.54707	0.752915	0.286969	0.315939	0.147213	0.543491	0.0329349
Q2/1977	2.26139	5.6218				-0.0390671	0.957958				1	0.225084	1.1375	-0.53543	0.803748	0.0162464	-0.0554897	-0.059374	-0.0346431	0.0941099		-0.0553969	0.0304082	0.0783148	0.134034	0.153459	0.0898823	0.690227	4.72305	4.68076												1	1.29463	1.54707	0.752915	0.286969	0.156214	0.556238	0.0404224
Q3/1977	-0.115637	4.92944				-0.58991	0.669828				1	-0.0390671	0.225084	1.1375	-0.53543	-0.0138047	-0.0615499	-0.0896836	-0.0528144	0.0950298		-0.109018	-0.142545	-0.0886009	-0.0837994	0.0225984	3.72682	6.98614	4.72603	4.682												1	0.957958	1.29463	1.54707	0.752915	0.15781	0.534043	0.0438753
Q4/1977	6.82401	8.63645				1.01825	2.21252				1	-0.58991	-0.0390671	0.225084	1.1375	-0.00941448	-0.0986265	-0.016617	-0.0118428	0.119631		-0.00745552	0.18283	0.0946813	0.11861	0.1346	12.9965	14.5405	4.76599	4.72378												1	0.669828	0.957958	1.29463	1.54707	0.148762	0.548678	0.0327847
Q1/1978	1.64508	5.95694				-0.18189	1.09743				1	1.01825	-0.58991	-0.0390671	0.225084	-0.0434839	-0.14605	-0.00704361	0.0181025	0.0968582		-0.0381327	-0.166951	0.00974583	0.0166046	0.0350545	0.00415593	0.876416	4.18077	4.13601												1	2.21252	0.669828	0.957958	1.29463	0.150581	0.56512	0.0303506
Q2/1978	1.58239	7.26512				-0.196415	1.64184				1	-0.18189	1.01825	-0.58991	-0.0390671	-0.101269	-0.190896	-0.0314013	0.0767456	0.0713867		-0.0741653	-0.146584	-0.0407357	-0.0111012	-0.0195022	0.0462403	0.582818	3.89577	3.67874												1	1.09743	2.21252	0.669828	0.957958	0.128814	0.594996	0.0383106
Q3/1978	5.21127	6.61431				0.644525	1.371				1	-0.196415	-0.18189	1.01825	-0.58991	-0.127015	-0.214559	-0.0335395	0.0784236	0.0680019		-0.101672	-0.0390316	-0.0315408	-0.0750632	-0.0812182	8.70086	9.80797	3.84996	3.71442												1	1.64184	1.09743	2.21252	0.669828	0.124028	0.584814	0.040459
Q4/1978	4.64929	8.26769				0.514295	2.05906				1	0.644525	-0.196415	-0.18189	1.01825	-0.160032	-0.215977	-0.0337551	-0.00112085	0.0598701		-0.190983	-0.231437	-0.0570738	-0.0319149	0.0633701	10.3557	3.78637	3.8845	3.71922												1	1.371	1.64184	1.09743	2.21252	0.153572	0.587107	0.0586226
Q1/1979	0.494316	7.00485				-0.448562	1.53352				1	0.514295	0.644525	-0.196415	-0.18189	-0.114056	-0.242275	-0.0434581	-0.0448186	0.0728569		-0.257695	-0.271116	-0.142473	-0.141232	-0.118421	0.586336	2.02961	3.39014	3.35136												1	2.05906	1.371	1.64184	1.09743	0.149148	0.584472	0.0687654
Q2/1979	12.2321	9.51483				2.2715	2.57807				1	-0.448562	0.514295	0.644525	-0.196415	-0.162073	-0.224302	-0.0349828	0.0361112	0.0466475		-0.176527	-0.0653383	-0.113919	-0.133931	-0.111216	101.688	105.72	3.83008	3.81077												1	1.53352	2.05906	1.371	1.64184	0.127339	0.595365	0.0757429
Q3/1979	2.94336e-05	8.46029				-0.563106	2.13921				1	2.2715	-0.448562	0.514295	0.644525	-0.177451	-0.218071	-0.0202791	0.00785936	0.0559947		-0.174496	-0.623569	-0.0830878	-0.0507663	-0.0874497	0.068077	4.21308	3.78851	3.80072												1	2.57807	1.53352	2.05906	1.371	0.132605	0.611086	0.0884681
Q4/1979	2.44449	7.9509				0.00336289	1.92723				1	-0.563106	2.2715	-0.448562	0.514295	-0.184907	-0.259471	-0.00418529	-0.052091	0.0414387		-0.274308	-0.00362669	-0.0622597	-0.133358	-0.0471851	0.000909738	0.0475797	3.74038	3.71593												1	2.13921	2.57807	1.53352	2.05906	0.126363	0.623562	0.122031
Q1/1980	3.19217	8.34046				0.176627	2.08935				1	0.00336289	-0.563106	2.2715	-0.448562	-0.170475	-0.266527	-0.0162029	-0.0490614	0.0639939		-0.267798	-0.302395	-0.318521	-0.158493	-0.152537	4.27292	2.01762	3.74962	3.71844												1	1.92723	2.13921	2.57807	1.53352	0.122154	0.638805	0.128155
Q2/1980	-2.58354	8.73798				-1.16181	2.25477				1	0.176627	0.00336289	-0.563106	2.2715	-0.162598	-0.267428	-0.0309416	-0.0638022	0.0905654		-0.271606	0.031709	0.0830559	0.0212157	-0.0193346	26.526	24.3057	3.85557	3.81486												1	2.08935	1.92723	2.13921	2.57807	0.1244	0.655766	0.102871
Q3/1980	-1.59004	9.10074				-0.931583	2.40574				1	-1.16181	0.176627	0.00336289	-0.563106	-0.138162	-0.225601	0.00519428	-0.0613943	0.108941		-0.172859	0.0633088	-0.227756	-0.223912	-0.212224	18.4317	9.63617	3.83125	3.75335												1	2.25477	2.08935	1.92723	2.13921	0.113593	0.632387	0.0894008
Q4/1980	-0.531392	10.8412				-0.686255	3.13004				1	-0.931583	-1.16181	0.176627	0.00336289	-0.149646	-0.299166	0.0204292	-0.0500364	0.118228		-0.210546	0.0968769	-0.168957	-0.113636	-0.0970907	11.4205	6.46379	3.81086	3.73298												1	2.40574	2.25477	2.08935	1.92723	0.111204	0.627192	0.0776131
Q1/1981	4.73137	9.75802				0.533316	2.67927				1	-0.686255	-0.931583	-1.16181	0.176627	-0.171942	-0.290815	0.0191482	-0.0364276	0.0674081		-0.240687	0.064021	-0.118645	-0.00914579	-0.111189	4.10114	7.73509	3.80097	3.74733												1	3.13004	2.40574	2.25477	2.08935	0.0992797	0.592143	0.0583681
Q2/1981	-0.999779	7.36365				-0.794797	1.68284				1	0.533316	-0.686255	-0.931583	-1.16181	-0.205587	-0.343126	-0.000995198	-0.02584	0.0499794		-0.319982	-0.421893	-0.248081	-0.202918	-0.267432	2.58946	5.17889	3.7998	3.75337												1	2.67927	3.13004	2.40574	2.25477	0.0899178	0.587997	0.0867774
Q3/1981	1.05235	7.08748				-0.319245	1.56791				1	-0.794797	0.533316	-0.686255	-0.931583	-0.2051	-0.31824	0.00176128	-0.0301421	0.0323405		-0.31428	0.0393327	-0.0901824	-0.136368	-0.20635	2.39431	0.237336	3.74694	3.69106												1	1.68284	2.67927	3.13004	2.40574	0.108499	0.595147	0.0747846
Q4/1981	-0.315449	7.41816				-0.636214	1.70553				1	-0.319245	-0.794797	0.533316	-0.686255	-0.186518	-0.288133	0.0244434	-0.013687	0.0345393		-0.242838	-0.144963	-0.257286	-0.222302	-0.185626	4.49387	3.7807	3.72333	3.65828												1	1.56791	1.68284	2.67927	3.13004	0.0807882	0.588314	0.0866082
Q1/1982	1.49588	5.59146				-0.216463	0.945332				1	-0.636214	-0.319245	-0.794797	0.533316	-0.184401	-0.298902	0.0249656	0.0233655	0.0383597		-0.212212	-0.000317977	-0.123254	-0.0819474	-0.0916628	0.869972	0.290032	3.72451	3.65606												1	1.70553	1.56791	1.68284	2.67927	0.0696503	0.584017	0.0935242
Q2/1982	-2.46999	4.81631				-1.1355	0.622748				1	-0.216463	-0.636214	-0.319245	-0.794797	-0.203573	-0.293022	0.0631114	0.0437574	0.0678692		-0.118284	-0.248209	-0.238137	-0.17763	-0.206364	14.6603	16.0757	3.71782	3.66694												1	0.945332	1.70553	1.56791	1.68284	0.081495	0.566441	0.095646
Q3/1982	-3.97328	5.73869				-1.48386	1.0066				1	-1.1355	-0.216463	-0.636214	-0.319245	-0.219546	-0.324397	-0.00382287	0.0507139	0.0796632		-0.197843	0.0919362	-0.19401	-0.140341	-0.147392	46.2398	33.2609	3.87663	3.77783												1	0.622748	0.945332	1.70553	1.56791	0.0830625	0.599267	0.102476
Q4/1982	0.957209	4.43372				-0.341293	0.463532				1	-1.48386	-1.1355	-0.216463	-0.636214	-0.231852	-0.319369	-0.0427294	0.129568	0.0696888		-0.162841	0.218183	-0.30669	-0.21504	-0.17281	5.82878	0.528599	3.59377	3.51748												1	1.0066	0.622748	0.945332	1.70553	0.0698194	0.591053	0.0997546
Q1/1983	3.60875	3.22621				0.273164	-0.0389796				1	-0.341293	-1.48386	-1.1355	-0.216463	-0.257793	-0.325663	-0.0730027	0.116262	0.048538		-0.233865	-0.180843	-0.400338	-0.195238	-0.178358	3.83829	3.7964	3.47187	3.38273												1	0.463532	1.0066	0.622748	0.945332	0.0542443	0.595014	0.102613
Q2/1983	4.1891	2.70528				0.407651	-0.255771				1	0.273164	-0.341293	-1.48386	-1.1355	-0.23688	-0.369724	-0.106302	0.108475	0.067573		-0.299978	-0.539286	-0.401616	-0.384713	-0.240834	16.6977	7.83094	3.40718	3.33541												1	-0.0389796	0.463532	1.0066	0.622748	0.0329243	0.603006	0.11899
Q3/1983	-0.834341	4.17201				-0.756459	0.35462				1	0.407651	0.273164	-0.341293	-1.48386	-0.208561	-0.363149	-0.105841	0.0965939	0.0719592		-0.300437	-0.525256	-0.203822	-0.225503	-0.16702	0.995412	6.46982	3.40492	3.34692												1	-0.255771	-0.0389796	0.463532	1.0066	0.0430744	0.595972	0.113265
Q4/1983	5.49518	2.93489				0.710317	-0.160218				1	-0.756459	0.407651	0.273164	-0.341293	-0.176658	-0.361245	-0.0502242	0.0518412	0.042614		-0.317014	0.0757523	-0.0591348	-0.0976256	-0.192627	7.49834	15.1822	3.33217	3.22027												1	0.35462	-0.255771	-0.0389796	0.463532	0.0226529	0.618337	0.111225
Q1/1984	5.25561	4.23223				0.654801	0.37968				1	0.710317	-0.756459	0.407651	0.273164	-0.159476	-0.368467	-0.0858157	0.0717098	0.0272257		-0.355347	-0.319618	-0.133257	-0.0724595	-0.219159	17.6809	14.2232	3.41169	3.27309												1	-0.160218	0.35462	-0.255771	-0.0389796	-0.00846134	0.64314	0.104687
Q2/1984	-6.35098	3.34477				-2.03486	0.0103563				1	0.654801	0.710317	-0.756459	0.407651	-0.164387	-0.364683	-0.111396	0.088553	0.0423947		-0.345131	-0.532013	-0.14581	-0.154168	-0.197391	42.0576	62.8716	3.51362	3.49842												1	0.37968	-0.160218	0.35462	-0.255771	-0.0123732	0.628383	0.118042
Q3/1984	10.7475	3.22465				1.92746	-0.0396302				1	-2.03486	0.654801	0.710317	-0.756459	-0.1694	-0.354602	-0.139601	0.122401	0.0937605		-0.278042	0.476772	-0.012482	-0.0479797	-0.142581	39.1887	79.7943	3.66539	3.80145												1	0.0103563	0.37968	-0.160218	0.35462	0.00636672	0.644168	0.113035
Q4/1984	3.35316	2.67014				0.213935	-0.270391				1	1.92746	-2.03486	0.654801	0.710317	-0.144604	-0.383959	-0.151867	0.103689	0.103929		-0.328208	-0.433922	0.0923527	-0.0124733	-0.132865	7.81578	2.23961	3.60917	3.75603												1	-0.0396302	0.0103563	0.37968	-0.160218	-0.00297223	0.628982	0.0992037
Q1/1985	-2.18625	4.56441				-1.06974	0.517921				1	0.213935	1.92746	-2.03486	0.654801	-0.09852	-0.384338	-0.193558	0.0898909	0.128789		-0.359217	-0.652404	-0.413654	-0.456381	-0.1778	3.24335	14.8146	3.619	3.81614												1	-0.270391	-0.0396302	0.0103563	0.37968	-0.0142028	0.614866	0.103746
Q2/1985	3.98903	2.45229				0.361289	-0.361054				1	-1.06974	0.213935	1.92746	-2.03486	-0.0946622	-0.412878	-0.209167	0.0866292	0.203673		-0.331742	0.0547909	0.0220079	0.0684961	-0.152891	1.74932	4.92318	3.62615	3.83343												1	0.517921	-0.270391	-0.0396302	0.0103563	0.00174779	0.596712	0.103405
Q3/1985	5.176	2.2932				0.636352	-0.427259				1	0.361289	-1.06974	0.213935	1.92746	-0.123582	-0.467781	-0.224691	0.0958836	0.21117		-0.385418	0.375311	0.517575	0.286766	0.0472435	1.26891	6.46256	3.61555	3.8313												1	-0.361054	0.517921	-0.270391	-0.0396302	0.00408964	0.605948	0.0825946
Q4/1985	2.39274	2.27836				-0.00862985	-0.433434				1	0.636352	0.361289	-1.06974	0.213935	-0.125879	-0.466815	-0.239396	0.0566815	0.273504		-0.376026	-0.511551	-0.437718	-0.368916	-0.244088	4.70992	1.03238	3.57956	3.77581												1	-0.427259	-0.361054	0.517921	-0.270391	0.00577348	0.611996	0.0910109
Q1/1986	-2.29477	1.91798				-1.09489	-0.583408				1	-0.00862985	0.636352	0.361289	-1.06974	-0.113474	-0.429104	-0.196143	0.0223791	0.284572		-0.318296	-0.530921	-0.31152	-0.194411	-0.263736	5.92282	12.8641	3.6053	3.82509												1	-0.433434	-0.427259	-0.361054	0.517921	0.00233756	0.607503	0.0798497
Q2/1986	4.57646	1.58076				0.497417	-0.723747				1	-1.09489	-0.00862985	0.636352	0.361289	-0.124777	-0.417698	-0.201687	0.0212706	0.267026		-0.331088	0.444307	0.233093	0.27689	0.177991	0.0525247	1.9	3.60533	3.83047												1	-0.583408	-0.433434	-0.427259	-0.361054	-0.0252347	0.592895	0.074337
Q3/1986	2.94211	1.61087				0.11868	-0.711213				1	0.497417	-1.09489	-0.00862985	0.636352	-0.0941717	-0.416756	-0.191285	0.0465818	0.294915		-0.266545	0.0952317	0.0802011	0.0715363	-0.0355093	0.0102383	0.442711	3.56746	3.79207												1	-0.723747	-0.583408	-0.433434	-0.427259	-0.0185831	0.567774	0.0695478
Q4/1986	3.96868	2.23616				0.356572	-0.450997				1	0.11868	0.497417	-1.09489	-0.00862985	-0.0626658	-0.398506	-0.163622	0.00233078	0.316753		-0.243045	-0.196634	-0.282556	-0.273481	-0.204227	5.69886	5.85637	3.54701	3.80059												1	-0.711213	-0.723747	-0.583408	-0.433434	-0.0465357	0.569684	0.0479895
Q1/1987	-10.1674	2.92703				-2.91925	-0.163489				1	0.356572	0.11868	0.497417	-1.09489	-0.0786852	-0.406624	-0.156619	0.0394594	0.311257		-0.212527	-0.563429	-0.349375	-0.294361	-0.309635	103.347	126.814	3.97398	4.28299												1	-0.450997	-0.711213	-0.723747	-0.583408	-0.0409941	0.563474	0.0609407
Q2/1987	8.88066	2.69136				1.49485	-0.261561				1	-2.91925	0.356572	0.11868	0.497417	-0.0384228	-0.425978	-0.150453	0.0567826	0.346922		-0.172726	1.33077	0.25408	0.266571	0.233686	0.501351	29.6183	3.55394	3.99573												1	-0.163489	-0.450997	-0.711213	-0.723747	-0.0563682	0.550026	0.0502279
Q3/1987	2.75895	2.91				0.0762339	-0.170573				1	1.49485	-2.91925	0.356572	0.11868	-0.0492891	-0.343525	-0.125886	0.00712055	0.376041		-0.08625	-0.148148	-0.104674	-0.0427467	-0.0745967	0.937541	0.423636	3.55776	3.98088												1	-0.261561	-0.163489	-0.450997	-0.711213	-0.0529515	0.572502	0.0390984
Q4/1987	6.34895	3.31371				0.908166	-0.00256935				1	0.0762339	1.49485	-2.91925	0.356572	-0.0246049	-0.308717	-0.0925082	-0.0222084	0.341407		-0.0820266	0.00014223	-0.0732788	-0.236112	-0.0123441	15.3535	15.7787	3.62456	4.04216												1	-0.170573	-0.261561	-0.163489	-0.450997	-0.0442442	0.575214	0.0481765
Q1/1988	-3.64444	3.12909				-1.40766	-0.0793983				1	0.908166	0.0762339	1.49485	-2.91925	-0.0385717	-0.293967	-0.0941921	0.00720852	0.379619		-0.00133148	-1.41015	-1.06155	-1.09258	-0.859285	0.000115606	5.59977	3.60609	4.05598												1	-0.00256935	-0.170573	-0.261561	-0.163489	-0.0624182	0.582603	0.0781822
Q2/1988	7.18639	3.843				1.10223	0.217701				1	-1.40766	0.908166	0.0762339	1.49485	0.00957139	-0.276617	-0.102788	-0.00536082	0.380242		-0.00452378	0.873603	0.85845	0.811763	0.896336	0.973354	0.789412	3.49362	3.96435												1	-0.0793983	-0.00256935	-0.170573	-0.261561	-0.0528926	0.587192	0.0520925
Q3/1988	4.50682	4.67605				0.481278	0.564378				1	1.10223	-1.40766	0.908166	0.0762339	0.0300541	-0.249102	-0.108383	-0.0133542	0.391862		0.0210221	-0.0742027	-0.063272	-0.122616	-0.150984	5.74582	7.44403	3.43641	3.9557												1	0.217701	-0.0793983	-0.00256935	-0.170573	-0.0635783	0.596286	0.0523249
Q4/1988	4.68267	3.18065				0.52203	-0.0579405				1	0.481278	1.10223	-1.40766	0.908166	0.0428714	-0.217989	-0.0357433	0.0319891	0.368415		0.146672	0.188113	0.303749	0.290146	0.251206	2.0763	1.3658	3.39366	3.93551												1	0.564378	0.217701	-0.0793983	-0.00256935	-0.0566885	0.613462	0.0316781
Q1/1989	4.15888	4.34672				0.400648	0.427327				1	0.52203	0.481278	1.10223	-1.40766	0.0753183	-0.182591	-0.0160465	0.0461007	0.355083		0.202547	-0.476745	-0.498682	-0.603896	-0.604119	14.3352	18.7994	3.44046	3.9792												1	-0.0579405	0.564378	0.217701	-0.0793983	-0.0729576	0.633407	0.0334996
Q2/1989	1.60696	4.10381				-0.190723	0.326237				1	0.400648	0.52203	0.481278	1.10223	0.111551	-0.166471	-0.0334196	0.0267139	0.273751		0.100574	0.342003	0.567562	0.566329	0.580477	5.2847	11.0751	3.45268	4.00229												1	0.427327	-0.0579405	0.564378	0.217701	-0.0708737	0.640665	0.0339422
Q3/1989	3.6364	2.89525				0.279572	-0.176712				1	-0.190723	0.400648	0.52203	0.481278	0.156463	-0.157693	-0.0892936	-0.014461	0.212557		-0.04889	0.245513	0.186924	0.174297	0.12057	0.021601	0.470779	3.44192	4.0032												1	0.326237	0.427327	-0.0579405	0.564378	-0.0870574	0.639223	0.0268068
Q4/1989	4.60857	2.79102				0.504858	-0.220086				1	0.279572	-0.190723	0.400648	0.52203	0.168359	-0.128801	-0.0645061	-0.0484828	0.218768		-0.0230215	0.239431	0.239945	0.222613	0.197772	1.31191	1.75604	3.42745	3.99529												1	-0.176712	0.326237	0.427327	-0.0579405	-0.0820662	0.644415	0.00641893
Q1/1990	8.21783	4.42331				1.34125	0.459201				1	0.504858	0.279572	-0.190723	0.400648	0.214451	-0.104026	-0.070199	-0.0317106	0.239407		0.0334713	0.244272	0.216381	0.184621	0.18706	22.4084	24.8068	3.52427	4.09004												1	-0.220086	-0.176712	0.326237	0.427327	-0.105336	0.651599	0.0192267
Q2/1990	1.96182	4.12182				-0.108489	0.333732				1	1.34125	0.504858	0.279572	-0.190723	0.243891	-0.0911363	-0.0497308	-0.0756114	0.24803		0.0315515	0.0281036	0.0990735	0.0697651	0.061834	0.347428	0.540204	3.46023	4.03026												1	0.459201	-0.220086	-0.176712	0.326237	-0.0940262	0.636804	0.0125388
Q3/1990	8.33627	3.54972				1.3687	0.0956498				1	-0.108489	1.34125	0.504858	0.279572	0.258676	-0.0893857	-0.0435013	-0.0804463	0.235845		0.022512	0.235349	0.205798	0.237919	0.194968	23.9189	25.6537	3.35792	4.00066												1	0.333732	0.459201	-0.220086	-0.176712	-0.101179	0.652943	0.0312877
Q4/1990	6.98042	2.99147				1.0545	-0.136671				1	1.3687	-0.108489	1.34125	0.504858	0.230402	-0.0782733	-0.0640288	-0.0686778	0.216571		0.00559138	0.147439	0.253528	0.247544	0.295866	15.321	10.7171	3.40181	4.04025												1	0.0956498	0.333732	0.459201	-0.220086	-0.0968101	0.658713	0.0368526
Q1/1991	11.4172	3.9253				2.08267	0.251951				1	1.0545	1.3687	-0.108489	1.34125	0.256449	-0.0734413	-0.0630093	-0.0720855	0.186397		-0.022139	0.350591	0.429153	0.550832	0.541643	55.8663	44.2217	3.63293	4.19368												1	-0.136671	0.0956498	0.333732	0.459201	-0.104776	0.659516	0.0307625
Q2/1991	-1.66491	2.71433				-0.948931	-0.252002				1	2.08267	1.0545	1.3687	-0.108489	0.265923	-0.12041	-0.0488103	-0.02962	0.177511		-0.0213291	-0.0961206	0.0453728	0.0698758	0.153891	13.5431	22.6477	3.61933	4.24852												1	0.251951	-0.136671	0.0956498	0.333732	-0.119117	0.651257	0.0403006
Q3/1991	-2.02736	2.91624				-1.03292	-0.167977				1	-0.948931	2.08267	1.0545	1.3687	0.226934	-0.125171	-0.0915491	-0.0128657	0.186608		-0.042978	0.396889	0.387567	0.410134	0.48375	38.0691	42.8349	3.77599	4.38023												1	-0.252002	0.251951	-0.136671	0.0956498	-0.128012	0.63269	0.021798
Q4/1991	5.14961	2.16777				0.630236	-0.479456				1	-1.03292	-0.948931	2.08267	1.0545	0.172421	-0.141103	-0.0799494	-0.0470848	0.158108		-0.110029	0.462699	0.434112	0.349445	0.394753	0.522682	1.0326	3.74702	4.32946												1	-0.167977	-0.252002	0.251951	-0.136671	-0.14109	0.617443	0.00837253
Q1/1992	6.35748	1.73531				0.910144	-0.65943				1	0.630236	-1.03292	-0.948931	2.08267	0.119028	-0.111613	-0.0522854	-0.0305389	0.13937		-0.0550676	0.421934	0.563682	0.537112	0.577474	4.43841	2.06082	3.69138	4.28534												1	-0.479456	-0.167977	-0.252002	0.251951	-0.163874	0.626611	0.0289193
Q2/1992	-2.62524	2.55711				-1.17147	-0.317432				1	0.910144	0.630236	-1.03292	-0.948931	0.0781653	-0.127686	-0.0681287	-0.0657464	0.134362		-0.127199	-0.140573	-0.0617253	-0.0455066	-0.0622239	19.7901	22.9125	3.59589	4.13708												1	-0.65943	-0.479456	-0.167977	-0.252002	-0.173791	0.634069	0.0403486
Q3/1992	-1.1945	1.9027				-0.839921	-0.589768				1	-1.17147	0.910144	0.630236	-1.03292	0.0614363	-0.083547	-0.0622151	0.00765987	0.141029		0.00292704	-0.0381603	-0.146113	-0.0593485	-0.0513232	11.9703	11.5804	3.47561	3.87088												1	-0.317432	-0.65943	-0.479456	-0.167977	-0.182748	0.62242	0.0114894
Q4/1992	-0.84821	2.69635				-0.759673	-0.259485				1	-0.839921	-1.17147	0.910144	0.630236	0.0602413	-0.152808	-0.0952542	-0.0274286	0.142206		-0.133285	0.364835	0.233361	0.13124	0.203831	23.5472	17.287	3.54563	3.93115												1	-0.589768	-0.317432	-0.65943	-0.479456	-0.180585	0.619895	0.0122284
Q1/1993	-3.5373	2.25936				-1.38283	-0.44134				1	-0.759673	-0.839921	-1.17147	0.910144	0.0286292	-0.139288	-0.0777427	0.024094	0.157866		-0.0350712	0.315196	0.246057	0.163698	0.202893	53.6912	46.8241	3.76138	4.05638												1	-0.259485	-0.589768	-0.317432	-0.65943	-0.181604	0.631047	0.0247232
Q2/1993	0.201542	2.42351				-0.516408	-0.373031				1	-1.38283	-0.759673	-0.839921	-1.17147	0.0335514	-0.114239	-0.0766578	0.0412727	0.147518		-0.00210578	0.0422799	-0.161387	-0.155663	-0.132263	5.81236	2.74792	3.77822	4.048												1	-0.44134	-0.259485	-0.589768	-0.317432	-0.182444	0.632459	0.0445942
Q3/1993	2.81089	2.39963				0.0882715	-0.382966				1	-0.516408	-1.38283	-0.759673	-0.839921	0.0431722	-0.0356316	-0.0938969	0.0493571	0.0719259		-0.00824558	0.093509	-0.0205314	-0.124294	-0.0688586	0.000510809	0.459761	3.77297	4.02476												1	-0.373031	-0.44134	-0.259485	-0.589768	-0.205408	0.591988	0.0402447
Q4/1993	-0.250166	2.08555				-0.621085	-0.513672				1	0.0882715	-0.516408	-1.38283	-0.759673	0.0492088	-0.0164829	-0.130474	0.0878263	0.0591617		3.0946e-05	-0.051261	-0.0345633	-0.136483	-0.0538435	6.04638	5.9917	3.7785	4.04397												1	-0.382966	-0.373031	-0.44134	-0.259485	-0.215057	0.594059	0.0335492
Q1/1994	4.86252	1.94893				0.563706	-0.570527				1	-0.621085	0.0882715	-0.516408	-1.38283	0.0430792	-0.0256734	-0.16517	0.0452997	0.0540943		-0.0914488	-0.0537518	-0.0886285	-0.0893264	-0.151531	7.09951	9.52608	3.78336	4.03105												1	-0.513672	-0.382966	-0.373031	-0.44134	-0.197694	0.592073	0.0347642
Q2/1994	1.38203	1.98468				-0.242848	-0.555652				1	0.563706	-0.621085	0.0882715	-0.516408	0.0197484	0.0570068	-0.128697	0.0549175	0.0856207		0.0688482	0.0924475	0.123108	0.0345588	0.0170726	2.09348	1.25804	3.79178	4.02856												1	-0.570527	-0.513672	-0.382966	-0.373031	-0.220209	0.593352	0.0515636
Q3/1994	2.99443	2.1392				0.130804	-0.491347				1	-0.242848	0.563706	-0.621085	0.0882715	-0.0136497	0.037539	-0.0738824	0.0279536	0.0558491		0.0474594	-0.0768456	-0.0740792	0.0254368	0.0609231	0.802924	0.0909341	3.79505	4.02719												1	-0.555652	-0.570527	-0.513672	-0.382966	-0.233213	0.600853	0.0344958
Q4/1994	5.24725	2.16418				0.652863	-0.480951				1	0.130804	-0.242848	0.563706	-0.621085	-0.0505611	0.00389405	-0.0831327	0.0357531	0.0236854		-0.0198001	-0.0244196	-0.0175217	-0.0185928	-0.0139396	8.54189	8.27959	3.80674	4.03659												1	-0.491347	-0.555652	-0.570527	-0.513672	-0.256197	0.610469	0.0551664
Q1/1995	-1.82638	2.244				-0.986349	-0.447735				1	0.652863	0.130804	-0.242848	0.563706	-0.0632658	-0.00791148	-0.1429	0.096423	0.0120091		-0.0423796	-0.103769	-0.0568612	0.0160641	0.0815641	14.5051	21.2366	3.42271	3.60482												1	-0.480951	-0.491347	-0.555652	-0.570527	-0.262139	0.604682	0.0393547
Q2/1995	3.4762	1.77676				0.242448	-0.642177				1	-0.986349	0.652863	0.130804	-0.242848	-0.0409158	-0.00490321	-0.157356	0.0985392	0.0272291		-0.0364904	-0.132534	-0.146043	-0.0498278	-0.0274631	2.61839	1.35661	3.43236	3.48017												1	-0.447735	-0.480951	-0.491347	-0.555652	-0.252738	0.591362	0.0449427
Q3/1995	1.34369	1.98379				-0.251731	-0.556021				1	0.242448	-0.986349	0.652863	0.130804	-0.0722274	-0.0429027	-0.175524	0.119197	-0.00556757		-0.104797	0.16759	0.182836	0.0172401	-0.0438031	3.27423	0.805083	3.44298	3.48188												1	-0.642177	-0.447735	-0.480951	-0.491347	-0.260505	0.601494	0.0344337
Q4/1995	-0.191661	2.11485				-0.607527	-0.50148				1	-0.251731	0.242448	-0.986349	0.652863	-0.0746132	-0.0775154	-0.174533	0.0564238	0.00406516		-0.19156	-0.150415	-0.243178	-0.100375	-0.0446981	3.89099	5.89884	3.39056	3.43726												1	-0.556021	-0.642177	-0.447735	-0.480951	-0.27078	0.606396	0.00189458
Q1/1996	-4.0223	2.37275				-1.49522	-0.394154				1	-0.607527	-0.251731	0.242448	-0.986349	-0.032996	-0.107062	-0.110529	0.0707443	0.0243263		-0.12252	0.0530281	-0.00934808	-0.0568199	-0.109111	44.6372	35.7776	3.59038	3.5718												1	-0.50148	-0.556021	-0.642177	-0.447735	-0.324924	0.603354	0.0300802
Q2/1996	5.6725	1.23487				0.751408	-0.867688				1	-1.49522	-0.607527	-0.251731	0.242448	0.00335394	-0.0665463	-0.159301	0.0785292	0.0346761		-0.112642	0.188274	0.0165652	-0.0608542	-0.00847953	5.90523	10.7526	3.61178	3.61513												1	-0.394154	-0.50148	-0.556021	-0.642177	-0.306967	0.588649	0.0267227
Q3/1996	2.42699	0.339909				-0.000691957	-1.24013				1	0.751408	-1.49522	-0.607527	-0.251731	-0.0204382	-0.03154	-0.174661	-0.00556617	0.00684004		-0.204927	0.21868	0.172578	-0.0897335	-0.0777748	0.89614	0.110644	3.59074	3.58329												1	-0.867688	-0.394154	-0.50148	-0.556021	-0.325447	0.583523	0.0221133
Q4/1996	2.22367	0.731786				-0.0478076	-1.07705				1	-0.000691957	0.751408	-1.49522	-0.607527	0.00628639	-0.0208677	-0.129543	-0.0244919	0.01527		-0.159632	-0.0636948	-0.15441	-0.176608	-0.0362474	0.00470011	0.00248853	3.58171	3.57734												1	-1.24013	-0.867688	-0.394154	-0.50148	-0.32509	0.587558	0.037004
Q1/1997	-2.41328	0.665606				-1.12236	-1.10459				1	-0.0478076	-0.000691957	0.751408	-1.49522	0.0109552	-0.0731227	-0.155235	-0.0248588	0.0407953		-0.212421	-0.0651189	-0.0335303	-0.0681729	-0.0494488	20.8142	21.4357	3.60986	3.58884												1	-1.07705	-1.24013	-0.867688	-0.394154	-0.325561	0.613516	0.0442949
Q2/1997	5.60901	-0.271681				0.736696	-1.49465				1	-1.12236	-0.0478076	-0.000691957	0.751408	0.0466349	-0.0793661	-0.131744	-0.00765921	0.0430517		-0.175717	0.174365	0.0538095	0.0267283	0.0126039	5.88841	9.76341	3.61248	3.58312												1	-1.10459	-1.07705	-1.24013	-0.867688	-0.334944	0.6114	0.0515466
Q3/1997	1.54161	0.528957				-0.205866	-1.16146				1	0.736696	-1.12236	-0.0478076	-0.000691957	0.0594116	-0.0601033	-0.146182	0.0400986	0.0651771		-0.101009	0.177239	0.180996	0.0182895	0.0116217	2.73307	0.880815	3.62418	3.58491												1	-1.49465	-1.10459	-1.07705	-1.24013	-0.313951	0.611861	0.0334569
Q4/1997	2.83408	0.888981				0.093645	-1.01163				1	-0.205866	0.736696	-1.12236	-0.0478076	0.0390104	-0.0546408	-0.149191	0.0245179	0.0831626		-0.0961515	-0.0911432	-0.107053	0.0158367	0.000933174	0.63586	0.16006	3.62127	3.57795												1	-1.16146	-1.49465	-1.10459	-1.07705	-0.31014	0.617559	0.0349772
Q1/1998	3.19345	0.65932				0.176925	-1.10721				1	0.093645	-0.205866	0.736696	-1.12236	0.0477091	-0.0599565	-0.138855	0.0224554	0.100852		-0.0755041	-0.0259688	-0.00057195	-0.0036748	-0.0281219	0.766568	0.782924	3.52665	3.47145												1	-1.01163	-1.16146	-1.49465	-1.10459	-0.320081	0.645323	0.0268745
Q2/1998	-1.28808	1.18211				-0.861606	-0.889646				1	0.176925	0.093645	-0.205866	0.736696	0.0388624	-0.0371667	-0.116858	-0.0350074	0.115549		-0.0734829	0.113675	0.105937	0.108858	0.130405	17.7122	18.3251	3.60277	3.5506												1	-1.10721	-1.01163	-1.16146	-1.49465	-0.303394	0.65109	0.00276881
Q3/1998	1.05838	2.09441				-0.317848	-0.509985				1	-0.861606	0.176925	0.093645	-0.205866	0.00623163	-0.0258508	-0.120622	-0.0788835	0.0254222		-0.199934	-0.00545688	-0.0131036	0.0263042	0.0137926	1.81723	2.04809	3.5056	3.44515												1	-0.889646	-1.10721	-1.01163	-1.16146	-0.30768	0.655402	-0.00684858
Q4/1998	-0.0919418	2.15032				-0.584419	-0.48672				1	-0.317848	-0.861606	0.176925	0.093645	0.0227197	0.00362932	-0.148533	-0.050063	0.048253		-0.146714	0.145204	0.0987257	0.0306925	0.0402832	9.91313	7.26707	3.48142	3.42947												1	-0.509985	-0.889646	-1.10721	-1.01163	-0.281153	0.642752	-0.0324877
Q1/1999	3.19349	3.18232				0.176934	-0.0572458				1	-0.584419	-0.317848	-0.861606	0.176925	-0.00498047	0.0195252	-0.116004	-0.0215014	0.101261		-0.016719	0.0569214	0.122129	0.076802	0.055717	0.268204	0.273615	3.22224	3.22302												1	-0.48672	-0.509985	-0.889646	-1.10721	-0.265182	0.629829	-0.0316072
Q2/1999	0.865446	1.58222				-0.362558	-0.723136				1	0.176934	-0.584419	-0.317848	-0.861606	0.0102054	0.0141191	-0.111142	0.002816	0.11267		0.0184626	-0.0203147	-0.0164872	-0.0240673	-0.0291357	2.18114	2.07015	3.16666	3.12167												1	-0.0572458	-0.48672	-0.509985	-0.889646	-0.241291	0.620901	-0.0297557
Q3/1999	4.16438	0.703491				0.401924	-1.08883				1	-0.362558	0.176934	-0.584419	-0.317848	0.0269384	0.0285283	-0.119088	-0.00685011	0.059212		-0.0381978	-0.0192925	-0.0472037	-0.0315252	-0.0181143	3.30388	3.28542	2.99021	2.917												1	-0.723136	-0.0572458	-0.48672	-0.509985	-0.263742	0.621024	-0.0102392
Q4/1999	4.96732	0.0844381				0.587994	-1.34645				1	0.401924	-0.362558	0.176934	-0.584419	0.0261269	0.0831253	-0.0876834	-0.0420023	0.0321562		-0.0144042	0.0651029	0.0337477	-0.0535512	-0.0640861	5.09139	7.918	3.01399	2.95365												1	-1.08883	-0.723136	-0.0572458	-0.48672	-0.258184	0.597366	0.00356087
Q1/2000	3.74069	0.295353				0.30374	-1.25868				1	0.587994	0.401924	-0.362558	0.176934	-0.000627652	0.106985	-0.0778963	-0.0687765	0.0200372		-0.0196506	0.0594513	0.0172143	0.0431588	0.0345735	1.11127	1.34913	2.99669	2.94988												1	-1.34645	-1.08883	-0.723136	-0.0572458	-0.230082	0.592458	0.016514
Q2/2000	4.03336	0.412144				0.371561	-1.21007				1	0.30374	0.587994	0.401924	-0.362558	-0.0731275	0.111873	-0.0110279	-0.0669888	0.0514687		0.0853247	-0.0912164	-0.0749774	-0.00669082	0.00281509	3.98803	2.53203	2.91313	2.83988												1	-1.25868	-1.34645	-1.08883	-0.723136	-0.232177	0.572904	0.034043
Q3/2000	-0.567474	1.70725				-0.694617	-0.671107				1	0.371561	0.30374	0.587994	0.401924	-0.0782958	0.160214	-0.0180768	-0.0304404	0.0243463		0.136043	-0.0323707	-0.105384	-0.0456669	0.0342512	8.16681	9.89262	2.89266	2.83058												1	-1.21007	-1.25868	-1.34645	-1.08883	-0.225235	0.57726	0.0297981
Q4/2000	0.305693	2.1571				-0.492273	-0.483899				1	-0.694617	0.371561	0.30374	0.587994	-0.0816373	0.184553	-0.026026	-0.0365771	0.0128318		0.134781	-0.223066	-0.0851292	-0.0739951	0.00802002	1.34954	4.66082	2.77016	2.76												1	-0.671107	-1.21007	-1.25868	-1.34645	-0.222002	0.594636	0.0366661
Q1/2001	6.48342	3.54662				0.939328	0.094361				1	-0.492273	-0.694617	0.371561	0.30374	-0.10438	0.2014	-0.0218377	-0.00732084	0.0345084		0.206749	-0.180593	-0.11442	-0.0952651	-0.0584998	23.3555	18.5406	2.59341	2.59495												1	-0.483899	-0.671107	-1.21007	-1.25868	-0.214306	0.605401	0.0377378
Q2/2001	0.343406	3.99368				-0.483533	0.280406				1	0.939328	-0.492273	-0.694617	0.371561	-0.112776	0.214504	-0.0674104	-0.0833321	0.0352591		0.0990207	0.192883	-0.112094	-0.0667734	-0.0819883	8.52004	3.00249	2.60968	2.59648												1	0.094361	-0.483899	-0.671107	-1.21007	-0.189	0.6316	0.0200599
Q3/2001	-1.16023	2.75139				-0.831979	-0.236579				1	-0.483533	0.939328	-0.492273	-0.694617	-0.0567524	0.227946	-0.0477293	-0.0611851	0.016399		0.13543	-0.193076	-0.118192	-0.143378	-0.0917368	7.60122	10.2038	2.65479	2.65447												1	0.280406	0.094361	-0.483899	-0.671107	-0.187093	0.628246	0.00171169
Q4/2001	0.473088	2.84505				-0.453481	-0.197603				1	-0.831979	-0.483533	0.939328	-0.492273	-0.0665462	0.239145	-0.0200622	-0.0676496	0.0284753		0.179908	-0.333372	-0.14323	-0.246764	-0.146474	0.268639	1.75514	2.62057	2.62941												1	-0.236579	0.280406	0.094361	-0.483899	-0.181107	0.625865	-0.0130975
Q1/2002	-1.2377	3.08175				-0.849933	-0.099098				1	-0.453481	-0.831979	-0.483533	0.939328	-0.0797037	0.242683	-0.0272861	-0.0980363	0.0491831		0.166544	-0.0734515	-0.0701204	-0.0351966	-0.140694	11.2273	9.36696	2.64507	2.62847												1	-0.197603	-0.236579	0.280406	0.094361	-0.170043	0.606217	0.0148592
Q2/2002	1.03349	2.99138				-0.323616	-0.136709				1	-0.849933	-0.453481	-0.831979	-0.483533	-0.0813123	0.23203	-0.0402074	-0.0784159	0.0384353		0.151842	-0.213633	-0.0273728	-0.0341126	-0.054055	0.225249	1.35309	2.63401	2.62903												1	-0.099098	-0.197603	-0.236579	0.280406	-0.171144	0.618709	0.00377619
Q3/2002	1.88777	3.03437				-0.125648	-0.118817				1	-0.323616	-0.849933	-0.453481	-0.831979	-0.0654939	0.210567	-0.0220247	-0.12694	0.0613602		0.122963	-0.108403	-0.0931254	-0.0808041	-0.0744357	0.00553801	0.0488386	2.62927	2.62878												1	-0.136709	-0.099098	-0.197603	-0.236579	-0.197829	0.63684	0.0319047
Q4/2002	-0.856987	3.11287				-0.761707	-0.0861465				1	-0.125648	-0.323616	-0.849933	-0.453481	-0.0513287	0.177502	-0.0113103	-0.131523	0.0982663		0.132935	-0.00274752	-0.00112737	-0.045112	-0.113669	10.7263	7.82014	2.64222	2.62605												1	-0.118817	-0.136709	-0.099098	-0.197603	-0.205652	0.632332	0.0363154
Q1/2003	-4.87671	3.12383				-1.69322	-0.0815863				1	-0.761707	-0.125648	-0.323616	-0.849933	-0.00604939	0.262113	-0.0296258	-0.122967	0.0882941		0.197815	-0.23723	-0.0913521	-0.0744158	-0.103951	39.4758	47.0337	2.78598	2.7753												1	-0.0861465	-0.118817	-0.136709	-0.099098	-0.233547	0.633832	0.0406907
Q2/2003	0.0868499	2.24432				-0.542986	-0.447599				1	-1.69322	-0.761707	-0.125648	-0.323616	0.017902	0.219871	-0.0340164	-0.112588	0.0988917		0.172159	-0.346334	-0.0587872	-0.0827878	-0.0872351	0.720132	3.86785	2.77531	2.7894												1	-0.0815863	-0.0861465	-0.118817	-0.136709	-0.231608	0.64117	0.0267321
Q3/2003	1.99196	3.46464				-0.101504	0.0602428				1	-0.542986	-1.69322	-0.761707	-0.125648	-0.0370337	0.252947	-0.0225769	-0.08426	0.0697021		0.215812	-0.080729	0.0726838	0.0681405	-0.0769761	0.00803723	0.0112032	2.75686	2.78495												1	-0.447599	-0.0815863	-0.0861465	-0.118817	-0.248338	0.649408	0.0103892
Q4/2003	1.466	3.46752				-0.223388	0.0614398				1	-0.101504	-0.542986	-1.69322	-0.761707	-0.0283277	0.236838	-0.00790547	-0.0365634	0.0536286		0.245997	-0.0270145	0.0443834	0.160973	-0.02453	0.718092	0.736378	2.73882	2.75584												1	0.0602428	-0.447599	-0.0815863	-0.0861465	-0.228777	0.645047	-0.0241499
Q1/2004	-0.0968799	5.35241				-0.585563	0.845849				1	-0.223388	-0.101504	-0.542986	-1.69322	-0.0460096	0.274611	0.0015365	-0.0346614	0.0328605		0.274346	-0.14433	-0.104875	-0.0962535	-0.0776298	3.62535	4.80427	2.49389	2.57424												1	0.0614398	0.0602428	-0.447599	-0.0815863	-0.224587	0.607493	-0.00676636
Q2/2004	1.37515	3.92842				-0.244441	0.253249				1	-0.585563	-0.223388	-0.101504	-0.542986	-0.038571	0.258748	-0.0319363	-0.0669194	0.00901213		0.168905	-0.181051	-0.100312	-0.0783607	-0.0934278	0.0748268	0.424664	2.45709	2.51077												1	0.845849	0.0614398	0.0602428	-0.447599	-0.207761	0.582077	0.00460522
Q3/2004	-0.729989	1.46795				-0.732277	-0.77069				1	-0.244441	-0.585563	-0.223388	-0.101504	-0.027772	0.256924	-0.0504347	-0.0942022	0.0120208		0.124308	-0.0412187	-0.0526827	-0.0693706	-0.0505132	8.8929	8.6553	2.50743	2.5634												1	0.253249	0.845849	0.0614398	0.0602428	-0.208003	0.580504	0.0112626
Q4/2004	0.38665	0.361202				-0.473512	-1.23127				1	-0.732277	-0.244441	-0.585563	-0.223388	0.00170506	0.263496	-0.0428607	-0.134176	0.0294079		0.115867	-0.108771	0.0264422	-0.00924807	-0.0675516	2.47733	3.06889	2.52279	2.58202												1	-0.77069	0.253249	0.845849	0.0614398	-0.19625	0.570466	0.0145845
Q1/2005	-0.773608	-0.222876				-0.742385	-1.47434				1	-0.473512	-0.732277	-0.244441	-0.585563	-0.0356215	0.20279	-0.028054	-0.162134	-0.0219409		-0.00933929	-0.0586215	0.0200084	-0.00291156	-0.0324427	8.70614	9.38556	2.44665	2.50804												1	-1.23127	-0.77069	0.253249	0.845849	-0.189876	0.554091	0.0113101
Q2/2005	2.65836	0.219245				0.0529244	-1.29035				1	-0.742385	-0.473512	-0.732277	-0.244441	-0.039658	0.180404	-0.0320068	-0.146385	-0.0334878		-0.0314754	-0.0430516	0.0898649	0.102705	-0.0289092	0.171529	0.124703	2.40986	2.44725												1	-1.47434	-1.23127	-0.77069	0.253249	-0.170119	0.553373	0.0129867
Q3/2005	3.23475	2.28086				0.186494	-0.432395				1	0.0529244	-0.742385	-0.473512	-0.732277	-0.0406848	0.218042	-0.081464	-0.129427	-0.0191431		-0.0119924	0.106636	0.0701741	0.0770859	0.0209695	0.118755	0.510197	2.39285	2.44489												1	-1.29035	-1.47434	-1.23127	-0.77069	-0.163701	0.560487	0.0194077
Q4/2005	1.5232	2.81726				-0.210134	-0.209167				1	0.186494	0.0529244	-0.742385	-0.473512	-0.0301989	0.211575	-0.0648197	-0.137378	-0.0210229		-0.0116453	0.11777	0.083404	0.0989107	-0.00261655	2.00219	0.801901	2.40176	2.44898												1	-0.432395	-1.29035	-1.47434	-1.23127	-0.169533	0.567628	0.0203492
Q1/2006	3.70933	4.20897				0.296471	0.37				1	-0.210134	0.186494	0.0529244	-0.742385	-0.00305024	0.249346	-0.0705239	-0.121963	-0.0468188		0.0100399	-0.0402957	-0.00903368	-0.0238246	0.00710282	2.11189	1.55925	2.4105	2.45393												1	-0.209167	-0.432395	-1.29035	-1.47434	-0.152533	0.588188	0.0254463
Q2/2006	6.35096	4.00773				0.908632	0.286253				1	0.296471	-0.210134	0.186494	0.0529244	-0.0239559	0.234368	-0.0111984	-0.081178	-0.036882		0.105109	0.0307893	-0.0235016	-0.0664768	-0.0674887	14.3498	17.7427	2.3886	2.45022												1	0.37	-0.209167	-0.432395	-1.29035	-0.169579	0.589976	0.0362706
Q3/2006	3.97483	3.28543				0.357998	-0.0143351				1	0.908632	0.296471	-0.210134	0.186494	-0.0647579	0.273277	-0.0157276	-0.0826829	-0.117411		0.0574556	0.174366	-0.00987993	0.0108287	-0.0637779	0.627928	3.31265	2.38081	2.45827												1	0.286253	0.37	-0.209167	-0.432395	-0.138713	0.593267	0.0381317
Q4/2006	5.18541	1.61362				0.638533	-0.710069				1	0.357998	0.908632	0.296471	-0.210134	-0.123553	0.249949	0.0101164	-0.0783369	-0.15754		0.0241886	-0.0150003	-0.0312395	-0.042933	0.01606	7.95333	7.21531	2.36791	2.45794												1	-0.0143351	0.286253	0.37	-0.209167	-0.15774	0.587486	0.0624299
Q1/2007	1.6366	4.39237				-0.183855	0.446325				1	0.638533	0.357998	0.908632	0.296471	-0.148278	0.254204	0.00404014	-0.105914	-0.148655		0.00367583	-0.124822	-0.241566	-0.185974	-0.0473413	0.0648927	0.347029	2.36657	2.45841												1	-0.710069	-0.0143351	0.286253	0.37	-0.162239	0.570781	0.0429061
Q2/2007	2.95528	2.37538				0.121733	-0.393059				1	-0.183855	0.638533	0.357998	0.908632	-0.162096	0.288108	0.0258475	-0.0787552	-0.133739		0.101461	-0.348275	-0.350418	-0.355274	-0.236189	4.11361	2.38556	2.37929	2.46041												1	0.446325	-0.710069	-0.0143351	0.286253	-0.147613	0.5801	0.0224926
Q3/2007	3.36783	1.76447				0.217334	-0.647291				1	0.121733	-0.183855	0.638533	0.357998	-0.136304	0.30506	0.0742401	-0.107212	-0.108783		0.163306	-0.220219	-0.365354	-0.358708	-0.270021	3.56513	4.42288	2.38101	2.46763												1	-0.393059	0.446325	-0.710069	-0.0143351	-0.160753	0.563639	0.0225586
Q4/2007	1.10325	2.3456				-0.307449	-0.405453				1	0.217334	0.121733	-0.183855	0.638533	-0.162532	0.275706	0.0738527	-0.0729037	-0.162814		0.113841	-0.18418	-0.244197	-0.347276	-0.32258	0.282957	0.0042631	2.34924	2.417												1	-0.647291	-0.393059	0.446325	-0.710069	-0.169568	0.566091	0.0128749
Q1/2008	3.49646	3.12153				0.247142	-0.0825432				1	-0.307449	0.217334	0.121733	-0.183855	-0.149544	0.287974	0.0933145	-0.0791865	-0.137915		0.164187	-0.202084	-0.176202	-0.220198	-0.219575	3.75789	4.05622	2.36678	2.43443												1	-0.405453	-0.647291	-0.393059	0.446325	-0.16697	0.586152	0.0103931
Q2/2008	-1.09363	3.33087				-0.816547	0.00457365				1	0.247142	-0.307449	0.217334	0.121733	-0.201652	0.237988	0.0850878	-0.0801796	-0.197476		0.04542	-0.21046	-0.270427	-0.260379	-0.211239	6.84043	6.82286	2.38554	2.46182												1	-0.0825432	-0.405453	-0.647291	-0.393059	-0.157735	0.599029	0.0031126
Q3/2008	-1.44977	4.68203				-0.899077	0.566866				1	-0.816547	0.247142	-0.307449	0.217334	-0.181379	0.234549	0.0743145	-0.0881375	-0.129286		0.0914393	-0.355533	-0.248977	-0.251905	-0.269291	5.50152	7.38583	2.36801	2.44586												1	0.00457365	-0.0825432	-0.405453	-0.647291	-0.153407	0.605979	0.00303042
Q4/2008	-7.8088	3.06808				-2.37269	-0.104787				1	-0.899077	-0.816547	0.247142	-0.307449	-0.214827	0.26043	0.0971637	-0.0796206	-0.148896		0.129076	-0.502212	-0.307483	-0.237915	-0.188916	65.1508	88.8034	2.75704	2.93457												1	0.566866	0.00457365	-0.0825432	-0.405453	-0.153811	0.617497	-0.0287614
Q1/2009	-18.3568	4.01531				-4.81704	0.289408				1	-2.37269	-0.899077	-0.816547	0.247142	-0.25381	0.293952	0.148233	-0.0594437	-0.115691		0.26705	-1.06459	-0.40476	-0.239903	-0.311388	262.206	378.033	3.88141	4.45486												1	-0.104787	0.566866	0.00457365	-0.0825432	-0.161735	0.597321	-0.0338932
Q2/2009	0.293253	1.43934				-0.495155	-0.782598				1	-4.81704	-2.37269	-0.899077	-0.816547	-0.229832	0.35358	0.165863	-0.0513245	-0.129295		0.338823	-2.17486	-0.77055	-0.175869	-0.123594	52.539	2.57084	4.05475	4.45335												1	0.289408	-0.104787	0.566866	0.00457365	-0.17889	0.585284	-0.001738
Q3/2009	2.37985	1.10245				-0.0116162	-0.922798				1	-0.495155	-4.81704	-2.37269	-0.899077	-0.302407	0.372972	0.136642	-0.0779989	-0.145754		0.285861	-0.829187	-1.55977	-0.393066	-0.126101	12.447	0.244067	4.07338	4.41827												1	-0.782598	0.289408	-0.104787	0.566866	-0.183177	0.577204	-0.026888
Q4/2009	3.64655	1.52696				0.281924	-0.746135				1	-0.0116162	-0.495155	-4.81704	-2.37269	-0.270951	0.313594	0.167265	-0.0198222	-0.126291		0.334746	0.0377184	0.0422244	-0.588054	-0.145792	1.11052	3.40663	4.0766	4.4241												1	-0.922798	-0.782598	0.289408	-0.104787	-0.190219	0.590503	-0.00910079
Q1/2010	2.92807	0.883402				0.115427	-1.01395				1	0.281924	-0.0116162	-0.495155	-4.81704	-0.203415	0.306724	0.177948	-0.0361553	-0.125176		0.323341	0.501872	0.357099	0.340766	0.0379793	2.78093	0.111693	4.0441	4.39129												1	-0.746135	-0.922798	-0.782598	0.289408	-0.206112	0.587915	-0.0226761
Q2/2010	8.10729	1.83961				1.31564	-0.616024				1	0.115427	0.281924	-0.0116162	-0.495155	-0.18632	0.346541	0.193965	-0.0687383	-0.127773		0.343995	-0.0275701	0.0630911	-0.0898938	-0.0326946	33.597	33.8538	4.17105	4.50545												1	-1.01395	-0.746135	-0.922798	-0.782598	-0.191695	0.591118	-0.0208496
Q3/2010	3.23725	2.43069				0.187075	-0.37004				1	1.31564	0.115427	0.281924	-0.0116162	-0.185517	0.284648	0.223932	-0.0691829	-0.0770138		0.362384	0.196216	-0.19138	-0.103495	-0.238692	0.00155591	3.37564	4.17103	4.51698												1	-0.616024	-1.01395	-0.746135	-0.922798	-0.199441	0.598538	-0.0113573
Q4/2010	3.32972	3.27322				0.208504	-0.0194196				1	0.187075	1.31564	0.115427	0.281924	-0.219095	0.257823	0.253245	-0.0244485	-0.129115		0.357505	0.123092	0.135252	-0.301945	-0.277368	0.135845	4.39599	4.13117	4.50511												1	-0.37004	-0.616024	-1.01395	-0.746135	-0.189638	0.588185	-0.0152849
Q1/2011	7.00398	3.62329				1.05996	0.126264				1	0.208504	0.187075	1.31564	0.115427	-0.194006	0.2459	0.271698	-0.00778805	-0.131692		0.378119	-0.117354	-0.187052	-0.202987	-0.34093	25.8106	36.5445	4.07915	4.46859												1	-0.0194196	-0.37004	-0.616024	-1.01395	-0.183968	0.561532	-0.0124242
Q2/2011	0.697616	4.02025				-0.40145	0.291462				1	1.05996	0.208504	0.187075	1.31564	-0.203399	0.225791	0.282965	-0.0108395	-0.149439		0.348477	-0.103707	-0.340929	-0.410592	-0.327906	1.65081	0.100718	4.08272	4.4554												1	0.126264	-0.0194196	-0.37004	-0.616024	-0.189775	0.567012	-0.00914273
Q3/2011	1.89292	2.71148				-0.124456	-0.253189				1	-0.40145	1.05996	0.208504	0.187075	-0.219258	0.249192	0.266777	0.00187399	-0.140872		0.376971	-0.0624861	0.0429	-0.335986	-0.399489	0.071511	1.40859	4.08296	4.46029												1	0.291462	0.126264	-0.0194196	-0.37004	-0.20702	0.587671	-0.0095953
Q4/2011	0.0770437	0.0391087				-0.545259	-1.36531				1	-0.124456	-0.40145	1.05996	0.208504	-0.233184	0.197419	0.249818	0.0191339	-0.107043		0.359328	-0.360081	-0.369313	-0.265706	-0.395799	0.638543	0.415969	4.08266	4.45917												1	-0.253189	0.291462	0.126264	-0.0194196	-0.210527	0.594855	-0.0114901
Q1/2012	1.2599	0.856845				-0.271148	-1.02501				1	-0.545259	-0.124456	-0.40145	1.05996	-0.227259	0.24343	0.237222	0.0168978	-0.157831		0.339719	-0.563593	-0.456505	-0.478028	-0.408529	1.59258	0.351455	4.07487	4.44354												1	-1.36531	-0.253189	0.291462	0.126264	-0.212803	0.613405	-0.0232088
Q2/2012	0.383904	1.63461				-0.474148	-0.701334				1	-0.271148	-0.545259	-0.124456	-0.40145	-0.220157	0.226556	0.19226	0.00741441	-0.219018		0.207212	-0.299417	-0.432544	-0.372671	-0.380467	0.568535	0.163425	4.07676	4.44262												1	-1.02501	-1.36531	-0.253189	0.291462	-0.201155	0.624856	-0.0216954
Q3/2012	0.919878	2.99055				-0.349944	-0.137052				1	-0.474148	-0.271148	-0.545259	-0.124456	-0.199758	0.231365	0.166988	0.0278551	-0.256256		0.169952	-0.338034	-0.316907	-0.455821	-0.414367	0.0026416	0.0772854	4.04254	4.41235												1	-0.701334	-1.02501	-1.36531	-0.253189	-0.222295	0.615961	-0.0372456
Q4/2012	-1.80342	3.53663				-0.98103	0.0902022				1	-0.349944	-0.474148	-0.271148	-0.545259	-0.238032	0.195407	0.116774	0.0204269	-0.295424		0.0371845	-0.206238	-0.224972	-0.232109	-0.364294	11.1785	7.08293	4.07604	4.42654												1	-0.137052	-0.701334	-1.02501	-1.36531	-0.237453	0.623323	-0.00728984
Q1/2013	-0.885525	4.54188				-0.768321	0.508541				1	-0.98103	-0.349944	-0.474148	-0.271148	-0.238401	0.16191	0.0761433	-0.00680008	-0.26122		-0.0299674	-0.349832	-0.248779	-0.251981	-0.276505	3.26123	4.50421	4.05511	4.40928												1	0.0902022	-0.137052	-0.701334	-1.02501	-0.239803	0.623446	0.0106544
Q2/2013	3.53035	3.19849				0.254996	-0.0505162				1	-0.768321	-0.98103	-0.349944	-0.474148	-0.238771	0.153391	0.0952834	-0.00890449	-0.241176		-0.00140546	-0.332632	-0.243505	-0.177802	-0.183538	6.43011	3.58113	4.07916	4.42151												1	0.508541	0.0902022	-0.137052	-0.701334	-0.241556	0.650467	-0.000381123
Q3/2013	2.01972	3.71934				-0.0950712	0.166237				1	0.254996	-0.768321	-0.98103	-0.349944	-0.227045	0.111085	0.0707533	-0.0549158	-0.252306		-0.125384	-0.110913	-0.269869	-0.206381	-0.202658	0.00467306	0.215542	4.07872	4.42047												1	-0.0505162	0.508541	0.0902022	-0.137052	-0.26629	0.651401	0.0203809
Q4/2013	1.63121	3.27932				-0.185104	-0.0168813				1	-0.0950712	0.254996	-0.768321	-0.98103	-0.218968	0.0914924	0.105047	-0.0565165	-0.273884		-0.133861	0.111232	0.0683892	-0.0684188	-0.0317139	1.63524	0.438135	4.07731	4.41918												1	0.166237	-0.0505162	0.508541	0.0902022	-0.279402	0.649219	0.0295304
Q1/2014	3.50529	2.22361				0.249189	-0.45622				1	-0.185104	-0.0950712	0.254996	-0.768321	-0.227247	0.0605101	0.141891	-0.0783374	-0.236942		-0.112878	-0.0898661	-0.0227586	-0.0474466	-0.0867179	2.1407	2.10113	4.07742	4.4211												1	-0.0168813	0.166237	-0.0505162	0.508541	-0.277206	0.658488	0.0439104
Q2/2014	-0.676076	2.51361				-0.719784	-0.335533				1	0.249189	-0.185104	-0.0950712	0.254996	-0.218612	0.0299763	0.123615	-0.0328965	-0.237191		-0.116497	-0.291379	-0.311921	-0.273832	-0.285723	3.41761	3.50845	4.03531	4.3705												1	-0.45622	-0.0168813	0.166237	-0.0505162	-0.277156	0.641585	0.0439611
Q3/2014	1.27605	1.76275				-0.267407	-0.648009				1	-0.719784	0.249189	-0.185104	-0.0950712	-0.199933	0.0140581	0.131127	-0.0440142	-0.147787		-0.0466162	-0.155179	-0.167903	-0.221846	-0.22666	0.234537	0.0309165	4.03379	4.35875												1	-0.335533	-0.45622	-0.0168813	0.166237	-0.283291	0.635131	0.0344454
Q4/2014	3.54397	0.111711				0.258151	-1.3351				1	-0.267407	-0.719784	0.249189	-0.185104	-0.170176	0.0114238	0.181519	-0.0603367	-0.145976		-0.0133704	-0.2919	-0.280109	-0.223956	-0.234031	5.63403	4.51092	4.02479	4.34905												1	-0.648009	-0.335533	-0.45622	-0.0168813	-0.298632	0.645921	0.0319004
Q1/2015	0.445471	-0.985193				-0.459881	-1.79158				1	0.258151	-0.267407	-0.719784	0.249189	-0.133977	0.0590035	0.109172	-0.0606193	-0.152475		-0.044918	-0.142301	-0.214996	-0.229365	-0.295601	1.8781	0.502557	4.03183	4.34961												1	-1.3351	-0.648009	-0.335533	-0.45622	-0.301011	0.646884	0.0447245
Q2/2015	1.77676	1.65209				-0.151373	-0.694062				1	-0.459881	0.258151	-0.267407	-0.719784	-0.161018	0.129254	0.119065	-0.0318468	-0.166055		0.0504172	-0.0616831	0.0117682	-0.104412	-0.126683	0.149796	0.0113516	4.01644	4.34107												1	-1.79158	-1.3351	-0.648009	-0.335533	-0.296774	0.644034	0.0285035
Q3/2015	1.29064	1.09184				-0.264026	-0.927212				1	-0.151373	-0.459881	0.258151	-0.267407	-0.110214	0.105173	0.0998622	-0.0538097	-0.195755		-0.0445298	-0.133603	-0.187564	-0.123695	-0.153748	0.316752	0.226461	4.00378	4.32594												1	-0.694062	-1.79158	-1.3351	-0.648009	-0.282172	0.639988	0.0351156
Q4/2015	1.68994	0.717249				-0.171492	-1.0831				1	-0.264026	-0.151373	-0.459881	0.258151	-0.107426	0.114668	0.111774	-0.035617	-0.206584		-0.0157597	-0.191571	-0.16517	-0.220827	-0.170726	0.00750732	1.09311e-05	4.0027	4.32592												1	-0.927212	-0.694062	-1.79158	-1.3351	-0.283271	0.628623	0.0369522
Q1/2016	2.5216	0.36351				0.0212328	-1.23031				1	-0.171492	-0.264026	-0.151373	-0.459881	-0.158971	0.120904	0.108805	-0.0868201	-0.224686		-0.0817979	-0.0919616	-0.0585086	-0.0427574	-0.133563	0.238596	0.446203	3.98894	4.31286												1	-1.0831	-0.927212	-0.694062	-1.79158	-0.271584	0.623308	0.0177467
Q2/2016	1.85359	2.56938				-0.133569	-0.312327				1	0.0212328	-0.171492	-0.264026	-0.151373	-0.123505	0.150007	0.0971996	-0.126734	-0.173317		-0.0528435	-0.0772926	-0.131815	-0.0948726	-0.0943835	0.0589756	0.0285939	3.96229	4.28818												1	-1.23031	-1.0831	-0.927212	-0.694062	-0.267877	0.639509	0.0255627
Q3/2016	1.33944	1.34645				-0.252717	-0.821256				1	-0.133569	0.0212328	-0.171492	-0.264026	-0.140797	0.148588	0.107113	-0.102461	-0.179288		-0.0260483	-0.0934615	-0.0655418	-0.110702	-0.0634778	0.472284	0.666862	3.94241	4.26363												1	-0.312327	-1.23031	-1.0831	-0.927212	-0.292923	0.641595	0.0223959
Q4/2016	1.659	1.86272				-0.178663	-0.606408				1	-0.252717	-0.133569	0.0212328	-0.171492	-0.140566	0.146157	0.130899	-0.0454379	-0.192782		0.0388361	-0.16289	-0.14042	-0.113818	-0.140182	0.00463256	0.0275747	3.67516	3.92483												1	-0.821256	-0.312327	-1.23031	-1.0831	-0.288654	0.631655	0.00172635
Q1/2017	3.583	1.78072				0.267197	-0.640529				1	-0.178663	-0.252717	-0.133569	0.0212328	-0.187987	0.156946	0.0899691	-0.108205	-0.191984		-0.053274	-0.228387	-0.195478	-0.161794	-0.140834	4.57351	3.10027	2.33575	1.92032												1	-0.606408	-0.821256	-0.312327	-1.23031	-0.286416	0.628364	-0.00806787
Q2/2017	2.52454	0.644577				0.0219148	-1.11334				1	0.267197	-0.178663	-0.252717	-0.133569	-0.183354	0.14759	0.117088	-0.134802	-0.20894		-0.0790648	-0.102863	-0.186917	-0.153226	-0.146355	0.289927	0.527261	1.95524	1.90362												1	-0.640529	-0.606408	-0.821256	-0.312327	-0.290844	0.601028	-0.00527813
Q3/2017	2.93118	1.88321				0.116148	-0.597879				1	0.0219148	0.267197	-0.178663	-0.252717	-0.168991	0.185942	0.166657	-0.118022	-0.191085		0.0434925	-0.0510095	-0.0903636	-0.170021	-0.132428	0.520313	1.15062	1.85749	1.91104												1	-1.11334	-0.640529	-0.606408	-0.821256	-0.278094	0.609651	-0.0160563
Q4/2017	2.42055	2.35196				-0.00218473	-0.402804				1	0.116148	0.0219148	0.267197	-0.178663	-0.153224	0.235632	0.222295	-0.128114	-0.191407		0.138407	-0.121019	-0.172219	-0.207424	-0.172474	0.262965	0.539996	1.85034	1.88746												1	-0.597879	-1.11334	-0.640529	-0.606408	-0.272455	0.607115	-0.0270722
[truncated: 12 more columns]

## Sheet: Forecast&Persistence_IT
Q1/1960 !Q mag=bil	Quarterly Real GDP Growth (Annualized)	Quarterly GDP Deflator Growth (Annualized)				Standardized Series										Coefficients AR(4) on Real GDP Growth																															Coefficients AR(4) on Inflation Rate (GDP Deflator)
.DESC						Real GDPGrowth	Inflation (GDP Deflator)									Matrix bm in the Gauss code																															Matrix bm in the Gauss code
.T1
.TN																							Forecast
.LSOURCE											Regressors					Time-Varying Coefficients Estimated						Persistence	One-period ahead	Two-periods ahead	Three-periods ahead	Four-periods ahead	Squared Forecasting Error	Squared Forecasting Error	RMSFE	RMSFE												Regressors					Time-Varying Coefficients Estimated
.DTLM											constant	lag1	lag2	lag3	lag4	intercept	lag1	lag2	lag3	lag4			t+1 with information up to t	t+2 with information up to t	t+3 with information up to t	t+4 with information up to t	One-period ahead	Four-period ahead	One-period ahead	Four-period ahead												constant	lag1	lag2	lag3	lag4	intercept	lag1	lag2
Q1/1960	#N/A	#N/A				#N/A	#N/A				1											#N/A							#N/A	#N/A												1
Q2/1960	5.82775	0.90034				0.853172	-1.02322				1											#N/A							#N/A	#N/A												1
Q3/1960	5.83182	1.60626				0.854177	-0.738453				1											#N/A							#N/A	#N/A												1
Q4/1960	0.306898	1.09898				-0.51052	-0.943093				1											#N/A							#N/A	#N/A												1
Q1/1961	14.0804	0.998779				2.89163	-0.983512				1											#N/A							#N/A	#N/A												1
Q2/1961	8.37371	0.966539				1.48204	-0.996518				1	2.89163	-0.51052	0.854177	0.853172	0.508305	0.256817	0.31751	0.114236	-0.390225		0.298339	0.853479	#N/A	#N/A	#N/A	6.47557	#N/A	#N/A	#N/A	1											1	-0.983512	-0.943093	-0.738453	-1.02322	-0.0598404	0.620582	-0.053794
Q3/1961	9.21559	0.910925				1.68999	-1.01895				1	1.48204	2.89163	-0.51052	0.854177	0.472554	0.254149	0.297131	0.137971	-0.405958		0.283292	1.29121	1.25397	#N/A	#N/A	2.60651	#N/A	#N/A	#N/A	1											1	-0.996518	-0.983512	-0.943093	-0.738453	-0.0610449	0.589601	-0.055906
Q4/1961	7.58029	1.20445				1.28606	-0.900544				1	1.68999	1.48204	2.89163	-0.51052	0.469674	0.301993	0.307897	0.146793	-0.446721		0.309961	2.08889	1.84728	1.63088	#N/A	10.5638	#N/A	#N/A	#N/A	1											1	-1.01895	-0.996518	-0.983512	-0.943093	-0.0507968	0.571319	-0.0799275
Q1/1962	5.87636	2.16568				0.865179	-0.512783				1	1.28606	1.68999	1.48204	2.89163	0.480027	0.296213	0.259904	0.131331	-0.448226		0.239221	0.198746	0.546648	0.356294	0.294407	7.27936	5.33956	#N/A	#N/A	1											1	-0.900544	-1.01895	-0.996518	-0.983512	-0.053082	0.572097	-0.0917689
Q2/1962	4.28354	0.792637				0.471741	-1.06667				1	0.865179	1.28606	1.68999	1.48204	0.466167	0.30127	0.258903	0.108808	-0.458824		0.210157	0.563673	0.430809	0.863939	0.688492	0.138521	0.77002	#N/A	#N/A	2											1	-0.512783	-0.900544	-1.01895	-0.996518	-0.0337698	0.564504	-0.0644205
Q3/1962	2.3943	0.725734				0.00508401	-1.09366				1	0.471741	0.865179	1.28606	1.68999	0.510061	0.315937	0.275852	0.112871	-0.47392		0.23074	0.242001	0.224507	0.0706946	0.450567	0.919968	3.25268	#N/A	#N/A	2											1	-1.06667	-0.512783	-0.900544	-1.01895	-0.0283341	0.557773	-0.0406319
Q4/1962	5.9617	0.68957				0.886257	-1.10825				1	0.00508401	0.471741	0.865179	1.28606	0.51143	0.275445	0.288718	0.093726	-0.459644		0.198245	0.138989	0.204812	0.183803	0.0625915	9.15236	11.1194	#N/A	#N/A	2											1	-1.09366	-1.06667	-0.512783	-0.900544	-0.0400311	0.529199	-0.0423369
Q1/1963	2.64654	1.8334				0.0673887	-0.646826				1	0.886257	0.00508401	0.471741	0.865179	0.510474	0.241119	0.293885	0.100547	-0.473799		0.161753	0.363173	0.197722	0.284745	0.244034	1.43394	0.511427	#N/A	#N/A	2											1	-1.10825	-1.09366	-1.06667	-0.512783	-0.0341005	0.492588	-0.0759884
Q2/1963	10.818	0.62041				2.0858	-1.13615				1	0.0673887	0.886257	0.00508401	0.471741	0.504409	0.24686	0.294675	0.034725	-0.469788		0.106472	0.560761	0.6355	0.389664	0.460268	38.1188	43.3081	#N/A	#N/A	3											1	-0.646826	-1.10825	-1.09366	-1.06667	-0.00501294	0.471001	-0.0514403
Q3/1963	6.51192	0.3682				1.02217	-1.23789				1	2.0858	0.0673887	0.886257	0.00508401	0.483209	0.237353	0.28463	0.0625839	-0.441173		0.143394	1.05068	0.691083	0.857138	0.686537	0.0133274	1.8463	#N/A	#N/A	3											1	-1.13615	-0.646826	-1.10825	-1.09366	-0.0302223	0.480234	-0.0522616
Q4/1963	4.09264	3.33765				0.424586	-0.0400089				1	1.02217	2.0858	0.0673887	0.886257	0.455125	0.21433	0.313747	0.0550704	-0.410771		0.172377	0.968282	0.939497	0.42624	0.520519	4.84498	0.150838	#N/A	#N/A	3											1	-1.23789	-1.13615	-0.646826	-1.10825	-0.0669042	0.485558	-0.0506112
Q1/1964	5.88562	1.39996				0.867466	-0.821676				1	0.424586	1.02217	2.0858	0.0673887	0.449151	0.25659	0.322933	0.0515038	-0.389458		0.241568	0.969369	1.07054	1.10606	0.80109	0.170197	0.0722103	#N/A	#N/A	3											1	-0.0400089	-1.23789	-1.13615	-0.646826	-0.0731095	0.472886	-0.0445719
Q2/1964	-4.06813	1.02571				-1.59118	-0.972649				1	0.867466	0.424586	1.02217	2.0858	0.468294	0.283882	0.314943	0.0718573	-0.406769		0.263914	0.0732863	0.0753093	0.187878	0.158706	45.4079	50.1881	#N/A	#N/A	4											1	-0.821676	-0.0400089	-1.23789	-1.13615	-0.0527374	0.465204	-0.0475623
Q3/1964	-0.676189	1.58494				-0.75335	-0.747053				1	-1.59118	0.867466	0.424586	1.02217	0.414486	0.240335	0.300686	0.0527254	-0.418762		0.174984	-0.112754	0.377025	0.405292	0.46472	6.72587	24.3178	#N/A	#N/A	4											1	-0.972649	-0.821676	-0.0400089	-1.23789	-0.0388944	0.483814	-0.0406869
Q4/1964	-1.67744	1.90729				-1.00067	-0.61702				1	-0.75335	-1.59118	0.867466	0.424586	0.369957	0.211173	0.326116	0.0766441	-0.367602		0.246331	-0.397633	-0.223122	0.488031	0.462032	5.96023	35.0663	#N/A	#N/A	4											1	-0.747053	-0.972649	-0.821676	-0.0400089	-0.0380179	0.48309	-0.0319195
Q1/1965	5.36445	2.03015				0.738733	-0.567456				1	-1.00067	-0.75335	-1.59118	0.867466	0.401945	0.226707	0.236826	0.0916901	-0.361547		0.193676	-0.462851	-0.400529	-0.120199	0.377987	23.664	2.13296	#N/A	#N/A	4											1	-0.61702	-0.747053	-0.972649	-0.821676	-0.0199647	0.457647	-0.0591054
Q2/1965	7.89685	1.59097				1.36425	-0.744624				1	0.738733	-1.00067	-0.75335	-1.59118	0.39795	0.235129	0.191243	0.0621222	-0.329687		0.158807	0.85807	0.566242	0.682884	0.978891	4.19949	2.43401	#N/A	#N/A	5											1	-0.567456	-0.61702	-0.747053	-0.972649	-0.0512571	0.427841	-0.0678414
Q3/1965	5.29306	1.6261				0.721099	-0.730452				1	1.36425	0.738733	-1.00067	-0.75335	0.439422	0.242695	0.183799	0.0201735	-0.302468		0.1442	1.11398	0.927191	0.60132	0.630002	2.52984	0.136016	#N/A	#N/A	5											1	-0.744624	-0.567456	-0.61702	-0.747053	-0.0392407	0.420713	-0.0681872
Q4/1965	5.96469	2.7631				0.886996	-0.271784				1	0.721099	1.36425	0.738733	-1.00067	0.454171	0.190177	0.2148	-0.00522749	-0.313291		0.0864577	1.19399	1.2781	1.15586	0.991718	1.54466	0.179746	#N/A	#N/A	5											1	-0.730452	-0.744624	-0.567456	-0.61702	-0.0238233	0.423132	-0.0657649
Q1/1966	3.84988	2.66279				0.364623	-0.31225				1	0.886996	0.721099	1.36425	0.738733	0.489916	0.19927	0.155967	-0.0131402	-0.293409		0.0486873	0.544457	0.597562	0.758437	0.656798	0.53006	1.39916	#N/A	#N/A	5											1	-0.271784	-0.730452	-0.744624	-0.567456	0.00252541	0.405045	-0.0438914
Q2/1966	5.65697	3.26164				0.810987	-0.0706743				1	0.364623	0.886996	0.721099	1.36425	0.425837	0.165372	0.17229	0.0396728	-0.257331		0.120003	0.316499	0.326992	0.393103	0.468234	4.00767	1.9255	#N/A	#N/A	6											1	-0.31225	-0.271784	-0.730452	-0.744624	0.0331247	0.422675	-0.0296867
Q3/1966	11.1434	3.78639				2.16617	0.141014				1	0.810987	0.364623	0.886996	0.721099	0.470963	0.182242	0.155836	0.0885581	-0.238994		0.187643	0.581793	0.390626	0.41676	0.425131	41.143	49.6816	#N/A	#N/A	6											1	-0.0706743	-0.31225	-0.271784	-0.730452	0.0347455	0.413391	-0.0215036
Q4/1966	1.91219	3.22523				-0.114001	-0.0853617				1	2.16617	0.810987	0.364623	0.886996	0.482628	0.212758	0.176699	0.0224	-0.210033		0.201824	0.908667	0.523676	0.331179	0.356557	17.1416	3.62916	#N/A	#N/A	6											1	0.141014	-0.0706743	-0.31225	-0.271784	0.0358061	0.423346	-0.0438856
Q1/1967	7.90172	1.8066				1.36546	-0.657637				1	-0.114001	2.16617	0.810987	0.364623	0.510236	0.1863	0.186869	0.0377382	-0.215311		0.195596	0.845885	1.0003	0.641741	0.466633	4.42458	13.2413	#N/A	#N/A	6											1	-0.0853617	0.141014	-0.0706743	-0.31225	0.0491533	0.429114	-0.0200691
Q2/1967	8.51224	2.12195				1.51626	-0.530425				1	1.36546	-0.114001	2.16617	0.810987	0.556916	0.157013	0.150398	0.0583687	-0.19259		0.173189	0.724413	0.553654	0.734197	0.527225	10.2769	16.0326	#N/A	#N/A	7											1	-0.657637	-0.0853617	0.141014	-0.0706743	0.0657822	0.418818	-0.0144441
Q3/1967	6.1172	3.71313				0.924669	0.111461				1	1.51626	1.36546	-0.114001	2.16617	0.526547	0.184408	0.1889	0.0729804	-0.205308		0.240981	0.611042	0.452184	0.300749	0.380972	1.61215	4.845	#N/A	#N/A	7											1	-0.530425	-0.657637	-0.0853617	0.141014	0.0676164	0.420252	0.00811788
Q4/1967	7.82674	4.30909				1.34694	0.351868				1	0.924669	1.51626	1.36546	-0.114001	0.520284	0.175734	0.177776	0.0924386	-0.229248		0.216701	1.10469	1.04871	0.83852	0.726195	0.961812	6.31541	#N/A	#N/A	7											1	0.111461	-0.530425	-0.657637	-0.0853617	0.0746903	0.409711	0.0278798
Q1/1968	0.971329	4.58922				-0.3464	0.464876				1	1.34694	0.924669	1.51626	1.36546	0.499916	0.164438	0.154634	0.0554429	-0.246265		0.12825	0.61219	0.705932	0.665681	0.535892	15.0608	12.7587	#N/A	#N/A	7											1	0.351868	0.111461	-0.530425	-0.657637	0.068349	0.400892	0.0628112
Q2/1968	8.2921	4.23444				1.46188	0.321756				1	-0.3464	1.34694	0.924669	1.51626	0.420456	0.149509	0.135882	0.0491318	-0.286636		0.0478871	0.162506	0.48673	0.578603	0.580699	27.6727	12.7267	#N/A	#N/A	8											1	0.464876	0.351868	0.111461	-0.530425	0.0760262	0.398176	0.0730651
Q3/1968	9.50394	3.8509				1.76122	0.167036				1	1.46188	-0.3464	1.34694	0.924669	0.417331	0.151315	0.1628	0.0237771	-0.301053		0.0368386	0.335793	0.198817	0.521583	0.637599	33.3019	20.6927	#N/A	#N/A	8											1	0.321756	0.464876	0.351868	0.111461	0.0775549	0.39844	0.0615068
Q4/1968	9.25587	5.39916				1.69994	0.791605				1	1.76122	1.46188	-0.3464	1.34694	0.389501	0.163317	0.157555	0.0341827	-0.310032		0.0450223	0.47803	0.292401	0.0691632	0.363188	24.4715	29.2876	#N/A	#N/A	8											1	0.167036	0.321756	0.464876	0.351868	0.0630172	0.425649	0.0466556
Q1/1969	6.21608	4.09713				0.949091	0.266363				1	1.69994	1.76122	1.46188	-0.3464	0.35702	0.118323	0.159398	0.0325993	-0.323367		-0.0130461	0.998568	0.902426	0.655287	0.565087	0.0401215	2.41687	3.31848	#N/A	8											1	0.791605	0.167036	0.321756	0.464876	0.0706318	0.417011	0.0648547
Q2/1969	7.15856	5.12088				1.18189	0.679347				1	0.949091	1.69994	1.76122	1.46188	0.281694	0.0814491	0.139432	0.0381664	-0.306221		-0.0471731	0.215583	0.330831	0.21917	0.131967	15.3042	18.0674	3.35979	#N/A												1	0.266363	0.791605	0.167036	0.321756	0.079539	0.448839	0.078735
Q3/1969	0.955496	5.8337				-0.350311	0.966899				1	1.18189	0.949091	1.69994	1.76122	0.320187	0.0607122	0.172149	0.0648498	-0.259267		0.0384437	0.208943	-0.0428541	0.0412325	0.0377831	5.12623	2.46862	3.37149	#N/A												1	0.679347	0.266363	0.791605	0.167036	0.0711674	0.453226	0.0828347
Q4/1969	-8.16819	5.12608				-2.60393	0.681446				1	-0.350311	1.18189	0.949091	1.69994	0.280883	0.0481167	0.202079	0.0618591	-0.255332		0.0567232	0.127523	0.157143	-0.176072	-0.10252	122.283	102.553	3.85463	3.86841												1	0.966899	0.679347	0.266363	0.791605	0.0811718	0.446423	0.0995826
Q1/1970	23.2942	5.30928				5.16751	0.755348				1	-2.60393	-0.350311	1.18189	0.949091	0.277011	0.0616664	0.192105	0.0768913	-0.253702		0.0769603	-0.10077	0.0470058	0.196274	-0.0210257	454.902	441.235	5.37089	5.34662												1	0.681446	0.966899	0.679347	0.266363	0.0851326	0.428838	0.0793301
Q2/1970	2.90934	6.02622				0.132303	1.04456				1	5.16751	-2.60393	-0.350311	1.18189	0.329467	0.0294921	0.197421	0.104854	-0.218407		0.11336	-0.327067	-0.556215	-0.01453	0.0662798	3.45864	0.0714458	5.38054	5.34458												1	0.755348	0.681446	0.966899	0.679347	0.105348	0.423652	0.070483
Q3/1970	7.94591	3.21257				1.37637	-0.0904681				1	0.132303	5.16751	-2.60393	-0.350311	0.322292	0.0407318	0.201406	0.0740321	-0.24543		0.07074	1.26165	1.14347	0.112008	0.387017	0.215697	16.0429	5.37849	5.38184												1	1.04456	0.755348	0.681446	0.966899	0.107953	0.417449	0.0299251
Q4/1970	0.447034	4.82795				-0.475905	0.561177				1	1.37637	0.132303	5.16751	-2.60393	0.286489	0.0779864	0.207245	0.0502508	-0.227667		0.107815	1.27375	1.42197	1.40917	0.82994	50.1745	27.9488	5.49637	5.43048												1	-0.0904681	1.04456	0.755348	0.681446	0.137926	0.444418	0.00670281
Q1/1971	-2.09765	5.66321				-1.10446	0.898122				1	-0.475905	1.37637	0.132303	5.16751	0.264148	0.0552811	0.212026	0.039493	-0.266197		0.0406026	-0.840686	-0.498754	-0.624152	-0.566145	1.14038	4.74958	5.49554	5.44266												1	0.561177	-0.0904681	1.04456	0.755348	0.130315	0.443079	-0.00223081
Q2/1971	1.68442	4.84191				-0.170262	0.566808				1	-1.10446	-0.475905	1.37637	0.132303	0.274437	0.128498	0.195444	0.0472051	-0.245791		0.125356	0.0719555	0.135908	0.550613	0.644195	0.961597	10.8722	5.38885	5.34873												1	0.898122	0.561177	-0.0904681	1.04456	0.128331	0.426576	-0.00273408
Q3/1971	5.81661	4.03282				0.850418	0.240422				1	-0.170262	-1.10446	-0.475905	1.37637	0.291921	0.189121	0.233935	0.0407678	-0.266773		0.19705	-0.385232	-0.292943	-0.291766	-0.0232831	25.0248	12.5114	5.46089	5.3798												1	0.566808	0.898122	0.561177	-0.0904681	0.121299	0.434993	-0.0328506
Q4/1971	2.25179	3.81421				-0.0301178	0.152234				1	0.850418	-0.170262	-1.10446	-0.475905	0.287473	0.177805	0.222643	0.105068	-0.206543		0.298973	0.383025	0.261168	0.315695	0.370318	2.79757	2.62813	5.45503	5.38699												1	0.240422	0.566808	0.898122	0.561177	0.121626	0.437185	-0.0250608
Q1/1972	4.39501	7.00828				0.499275	1.44073				1	-0.0301178	0.850418	-0.170262	-1.10446	0.308867	0.202067	0.239926	0.114828	-0.228153		0.328668	0.739253	0.755146	0.538894	0.532613	0.943896	0.0182162	5.45725	5.38683												1	0.152234	0.240422	0.566808	0.898122	0.101296	0.442388	-0.0206087
Q2/1972	-0.181275	2.85241				-0.631102	-0.235758				1	0.499275	-0.0301178	0.850418	-0.170262	0.278979	0.196433	0.298856	0.084332	-0.234947		0.344675	0.479772	0.587518	0.631537	0.48465	20.226	20.404	5.38467	5.29974												1	1.44073	0.152234	0.240422	0.566808	0.109471	0.434828	0.00356508
Q3/1972	5.35665	3.70996				0.736805	0.110179				1	-0.631102	0.499275	-0.0301178	0.850418	0.28443	0.198055	0.257088	0.130252	-0.190021		0.395373	0.122275	0.32009	0.407467	0.432487	6.18966	1.51787	5.38311	5.23208												1	-0.235758	1.44073	0.152234	0.240422	0.118747	0.462838	0.0161489
Q4/1972	1.89651	5.11768				-0.117874	0.678054				1	0.736805	-0.631102	0.499275	-0.0301178	0.279897	0.254555	0.236702	0.114359	-0.184332		0.421283	0.380719	0.217153	0.534419	0.623922	4.07448	9.0188	5.37763	5.15371												1	0.110179	-0.235758	1.44073	0.152234	0.141646	0.476357	0.0236048
Q1/1973	3.58983	5.1411				0.300388	0.687505				1	-0.117874	0.736805	-0.631102	0.499275	0.3141	0.274151	0.230291	0.0921903	-0.203232		0.3934	0.291814	0.38701	0.181799	0.402775	0.00120496	0.171816	5.30843	5.14776												1	0.678054	0.110179	-0.235758	1.44073	0.150518	0.492636	0.0179988
Q2/1973	11.8106	6.19849				2.33099	1.11406				1	0.300388	-0.117874	0.736805	-0.631102	0.291444	0.275782	0.212463	0.0867144	-0.223189		0.351771	0.553989	0.563142	0.669122	0.512113	51.7552	54.2232	5.44661	5.30263												1	0.687505	0.678054	0.110179	-0.235758	0.143501	0.507959	0.0546616
[truncated: 178 more rows]
[truncated: 12 more columns]

## Sheet: Forecast&Persistence_CA
Q1/1960 !Q mag=bil	Quarterly Real GDP Growth (Annualized)	Quarterly GDP Deflator Growth (Annualized)				Standardized Series										Coefficients AR(4) on Real GDP Growth																															Coefficients AR(4) on Inflation Rate (GDP Deflator)
[truncated: 237 more rows]
[truncated: 12 more columns]

[truncated: 7 more sheets: Forecast&Persistence_JP, Forecast&Persistence_ES, Forecast&Persistence_ALL, Figure2.A.Persistence RGDP, Figure2.B.Persistence Deflator, Figure3.A.RMSFE Real GDP, Figure3.B.RMSFE GDP Deflator]
