# Supplementary material for: Modeling time-variation over the business cycle (1960–2017): an international perspective
Source: publisher site journal article supplement (doi:10.1515/snde-2017-0101), 2018-11-22
Supplement: Supplementary file 5 [file G8data.7.1.2018_GDP&Deflator.xlsx]

## Sheet: README
Modeling Time-Variation Over the Business Cycle (1960-2017): An International Perspective
Enrique Martinez-Garcia
Federal Reserve Bank of Dallas and SMU
emg.economics@gmail.com
Date: 10/1/2018

## Sheet: Real GDP
Q1/1960 !Q mag=bil	.excel_last	B111GDPC@OECDNAQ	B112GDPC@OECDNAQ	B132GDPC@OECDNAQ	B134GDPC@OECDNAQ	B136GDPC@OECDNAQ	B156GDPC@OECDNAQ	B158GDPC@OECDNAQ	B184GDPC@OECDNAQ
.DESC		United States: Gross Domestic Product (SAAR, Bil.2010.US$, PPP)	United Kingdom: Gross Domestic Product (SAAR, Bil.2010.US$, PPP)	France: Gross Domestic Product (SAAR, Bil.2010.US$, PPP)	Germany: Gross Domestic Product (SAAR, Bil.2010.US$, PPP)	Italy: Gross Domestic Product (SAAR, Bil.2010.US$, PPP)	Canada: Gross Domestic Product (SAAR, Bil.2010.US$, PPP)	Japan: Gross Domestic Product (SAAR, Bil.2010US$, PPP)	Spain: Gross Domestic Product (SAAR, Bil.2010.US$, PPP)
.T1		Q1-1947	Q1-1955	Q1-1960	Q1-1960	Q1-1960	Q1-1960	Q1-1960	Q1-1960
.TN		Q1-2018	Q1-2018	Q1-2018	Q1-2018	Q1-2018	Q1-2018	Q1-2018	Q1-2018
.LSOURCE		Organization for Economic Cooperation & Development	Organization for Economic Cooperation & Development	Organization for Economic Cooperation & Development	Organization for Economic Cooperation & Development	Organization for Economic Cooperation & Development	Organization for Economic Cooperation & Development	Organization for Economic Cooperation & Development	Organization for Economic Cooperation & Development
.DTLM		Jun-29-2018 05:33	Jul-02-2018 06:06	Jun-26-2018 05:33	May-16-2018 06:21	Jun-04-2018 06:05	Jun-01-2018 05:26	Jun-08-2018 05:25	Jun-01-2018 05:26
Q1/1960	1960-03-31	3161.31	674.925	544.545	901.678	527.496	271.921	559.92	227.419
Q2/1960	1960-06-30	3149.31	670.087	546.59	917.725	535.238	266.692	560.95	232.094
Q3/1960	1960-09-30	3157.15	680.251	550.682	949.448	543.098	270.762	580.22	238.587
Q4/1960	1960-12-31	3118.94	684.405	557.209	959.152	543.515	271.658	602.52	243.39
Q1/1961	1961-03-31	3140.14	695.555	566.171	968.856	562.988	270.559	620.83	250.346
Q2/1961	1961-06-30	3198.51	698.355	575.231	963.63	574.898	277.363	634.07	261.465
Q3/1961	1961-09-30	3251.85	694.704	584.39	983.409	588.297	284.062	646.23	266.805
Q4/1961	1961-12-31	3317.75	693.595	594.319	987.889	599.552	288.039	675.88	274.333
Q1/1962	1962-03-31	3377.51	696.867	605.019	1002.44	608.425	295.666	684.96	280.823
Q2/1962	1962-06-30	3413.9	703.344	614.794	1012.89	614.976	297.815	694.53	287.356
Q3/1962	1962-09-30	3446.42	707.617	623.646	1037.15	618.668	301.723	703.02	294.393
Q4/1962	1962-12-31	3459.8	705.066	631.452	1034.91	627.957	307.856	717.71	295.183
Q1/1963	1963-03-31	3498.29	708.701	620.934	998.711	632.126	309.703	727.52	312.164
Q2/1963	1963-06-30	3543.9	739.096	648.661	1043.5	649.455	314.244	748.93	312.423
Q3/1963	1963-09-30	3613.08	742.856	670.059	1079.7	660.115	316.659	770.89	319.164
Q4/1963	1963-12-31	3638.86	759.352	672.145	1084.92	666.903	326.605	797.45	325.106
Q1/1964	1964-03-31	3717.57	763.921	684.799	1099.85	676.789	334.7	822.89	326.945
Q2/1964	1964-06-30	3761.78	777.109	691.366	1113.29	669.941	335.852	842.74	332.333
Q3/1964	1964-09-30	3812.87	780.174	699.844	1124.86	668.809	339.384	855.76	334.829
Q4/1964	1964-12-31	3826.39	792.045	706.168	1140.16	666.01	341.174	866.46	342.109
Q1/1965	1965-03-31	3920.76	789.835	707.736	1158.82	675.002	351.892	873.5	349.39
Q2/1965	1965-06-30	3974.36	790.676	725.345	1177.11	688.461	355.193	884.41	350.88
Q3/1965	1965-09-30	4055.08	797.246	735.826	1184.94	697.631	359.991	904.45	354.452
Q4/1965	1965-12-31	4150.72	802.183	746.071	1192.03	708.112	368.844	918.51	365.048
Q1/1966	1966-03-31	4253.21	803.506	752.802	1213.68	714.96	375.897	943.09	362.564
Q2/1966	1966-06-30	4270.63	808.173	764.188	1217.41	725.144	383.813	979.99	381.3
Q3/1966	1966-09-30	4301.05	810.839	772.903	1218.91	745.629	383.666	1003.82	388.864
Q4/1966	1966-12-31	4337.93	807.447	777.123	1199.87	749.202	388.295	1023.88	389.917
Q1/1967	1967-03-31	4377.75	818.441	790.44	1193.9	764.149	387.394	1051.01	390.991
Q2/1967	1967-06-30	4381.59	829.928	799.092	1190.17	780.585	395.522	1079.29	395.689
Q3/1967	1967-09-30	4419.42	833.579	806.733	1218.91	792.614	396.84	1116.71	402.476
Q4/1967	1967-12-31	4454.99	838.018	814.596	1234.58	808.276	398.341	1138.3	399.581
Q1/1968	1968-03-31	4545.46	868.486	838.298	1249.03	810.241	401.574	1165.46	408.108
Q2/1968	1968-06-30	4622.22	864.726	774.747	1258.74	827.213	412.479	1205.22	420.49
Q3/1968	1968-09-30	4655.51	881.933	862.861	1286.37	847.102	418.049	1232.51	423.881
Q4/1968	1968-12-31	4676.23	885.464	871.701	1305.79	866.933	423.811	1302.73	441.062
Q1/1969	1969-03-31	4748.94	883.494	873.303	1338.65	880.51	429.303	1314.19	456.711
Q2/1969	1969-06-30	4764.17	889.95	894.726	1355.82	896.41	431.365	1352.45	455.168
Q3/1969	1969-09-30	4793.99	894.97	903.184	1384.95	898.554	435.916	1384.85	463.659
Q4/1969	1969-12-31	4773.07	899.549	910.322	1406.23	880.391	442.055	1438.9	468.85
Q1/1970	1970-03-31	4764.61	893.803	927.721	1383.79	933.183	444.846	1482.99	477.616
Q2/1970	1970-06-30	4773.04	914.879	939.429	1438.81	939.996	444.663	1500.98	478.375
Q3/1970	1970-09-30	4815.32	923.949	952.368	1465.68	958.855	449.199	1541.21	480.819
Q4/1970	1970-12-31	4765.79	932.024	967.322	1478.11	959.927	449.957	1536.25	484.613
Q1/1971	1971-03-31	4893.4	926.522	968.57	1449.71	954.906	447.261	1550.25	488.398
Q2/1971	1971-06-30	4921.32	943.07	986.217	1480.14	958.936	460.339	1575.25	497.924
Q3/1971	1971-09-30	4959.8	959.478	1002.3	1505.74	972.982	473.026	1594.45	507.086
Q4/1971	1971-12-31	4974.28	963.274	1010.89	1504.48	978.475	478.398	1608.97	517.296
Q1/1972	1972-03-31	5063.54	964.286	1024.13	1506	989.285	476.534	1661.39	525.689
Q2/1972	1972-06-30	5180.79	990.096	1028.06	1530.59	988.837	490.084	1692.66	538.11
Q3/1972	1972-09-30	5228.54	992.788	1037.19	1566.34	1002.17	491.2	1728.79	549.932
Q4/1972	1972-12-31	5315.37	1008.32	1054.41	1590.68	1006.93	502.95	1772.28	560.826
Q1/1973	1973-03-31	5446.22	1058.29	1075.42	1612.67	1016.01	516.211	1831.56	571.149
Q2/1973	1973-06-30	5507.97	1059.8	1087.04	1624.59	1046.46	521.845	1848.31	581.332
Q3/1973	1973-09-30	5478.04	1049.66	1096.37	1629.91	1079.75	523.613	1853.7	590.933
Q4/1973	1973-12-31	5529.12	1045.2	1110.39	1633.97	1106.13	533.476	1876.61	600.657
Q1/1974	1974-03-31	5483.19	1016.71	1121.04	1647.79	1115.1	537.361	1812.13	610.858
Q2/1974	1974-06-30	5497.6	1031.38	1126.65	1646.52	1125.75	543.307	1825.18	618.576
Q3/1974	1974-09-30	5444.38	1038.07	1137.28	1646.52	1127.62	542.668	1848.53	622.942
Q4/1974	1974-12-31	5422.6	1023	1120.1	1625.73	1104.05	540.134	1838.51	623.354
Q1/1975	1975-03-31	5357.09	1023.5	1115.07	1616.35	1084.84	536.479	1840.92	620.225
Q2/1975	1975-06-30	5398.36	1006.76	1117.88	1608.23	1084.29	543.495	1881.79	619.71
Q3/1975	1975-09-30	5487.57	1003.37	1122.21	1625.73	1099.7	553.643	1903.2	622.417
Q4/1975	1975-12-31	5561.56	1014.7	1137.37	1657.67	1112.02	560.03	1923.22	626.792
Q1/1976	1976-03-31	5687.15	1031	1154.06	1672.57	1131.61	569.764	1939.51	633.021
Q2/1976	1976-06-30	5730.12	1029.17	1167.82	1697.42	1152.06	582.079	1950.97	640.328
Q3/1976	1976-09-30	5759.25	1041.98	1173.34	1697.92	1181.34	584.614	1978.4	646.538
Q4/1976	1976-12-31	5802.48	1063.96	1187.96	1729.36	1201.83	585.849	1980.75	651.503
Q1/1977	1977-03-31	5869.99	1064.49	1201.09	1744.13	1202.31	593.944	2024.08	656.664
Q2/1977	1977-06-30	5985.2	1056.77	1206.32	1754.02	1195.62	597.319	2038.32	659.643
Q3/1977	1977-09-30	6091.09	1064.09	1211.85	1753.51	1184.43	600.194	2052.22	661.835
Q4/1977	1977-12-31	6091.73	1082.54	1214.61	1783.68	1194.58	609.754	2080.06	666.256
Q1/1978	1978-03-31	6112.92	1091.88	1231.48	1791.03	1214.1	614.97	2119.35	670.416
Q2/1978	1978-06-30	6350.6	1105.08	1251.96	1798.13	1235.1	620.613	2139.95	671.774
Q3/1978	1978-09-30	6412.7	1120.03	1250.86	1821.71	1241.6	625.085	2167.63	670.95
Q4/1978	1978-12-31	6498.71	1130.24	1261.5	1843.01	1260.52	630.398	2198.91	669.957
Q1/1979	1979-03-31	6511.62	1125.81	1272.35	1845.29	1280.44	635.821	2231.79	668.889
Q2/1979	1979-06-30	6519.5	1175.72	1284.52	1902.59	1289.75	644.448	2272.57	669.929
Q3/1979	1979-09-30	6566.32	1150.02	1299.2	1902.59	1312.07	648.618	2289.9	671.54
Q4/1979	1979-12-31	6583.31	1162.09	1301.67	1914.25	1342.95	652.98	2299.86	673.9
Q1/1980	1980-03-31	6604.61	1150.79	1316.23	1929.59	1340.49	657.595	2308.66	678.413
Q2/1980	1980-06-30	6470.66	1128.01	1308.7	1917.17	1350.89	657.379	2296.49	680.719
Q3/1980	1980-09-30	6460.85	1126.61	1308.69	1909.56	1352.02	656.488	2347.93	678.02
Q4/1980	1980-12-31	6580.59	1114.65	1307.9	1907.03	1363.54	665.648	2397.83	681.952
Q1/1981	1981-03-31	6716.78	1112.88	1312.4	1929.72	1355.76	680.443	2412.53	678.091
Q2/1981	1981-06-30	6667.73	1115.59	1318.86	1924.9	1358.41	687.951	2442.05	677.34
Q3/1981	1981-09-30	6744.24	1127.72	1329.44	1929.97	1359.04	681.786	2436.62	680.352
Q4/1981	1981-12-31	6665.56	1129.02	1336.66	1928.45	1370.07	678.68	2454.41	679.673
Q1/1982	1982-03-31	6554.06	1130.78	1347.28	1935.67	1369.53	670.607	2492.02	682.471
Q2/1982	1982-06-30	6589.77	1143.49	1356.64	1923.76	1365.63	662.876	2509.13	685.063
Q3/1982	1982-09-30	6566.03	1146.51	1357.38	1904.74	1364.9	657.032	2520.1	689.675
Q4/1982	1982-12-31	6572.44	1154.59	1365.5	1909.31	1360.94	650.968	2555.12	692.106
Q1/1983	1983-03-31	6658.52	1175.5	1371	1926.61	1364.74	661.674	2556.73	694.635
Q2/1983	1983-06-30	6810.47	1185.52	1371.16	1946.89	1363.1	674.824	2575.95	698.925
Q3/1983	1983-09-30	6943.81	1198.58	1373.26	1942.84	1388.48	682.47	2614.5	699.953
Q4/1983	1983-12-31	7087.01	1208.94	1379.71	1969.71	1419.26	691.153	2636.28	704.476
Q1/1984	1984-03-31	7227.81	1217.28	1388.95	1995.76	1416.48	703.006	2666.64	710.303
Q2/1984	1984-06-30	7354.76	1206.66	1393.01	1964.32	1421.04	716.757	2707.02	708.113
Q3/1984	1984-09-30	7427.11	1214.51	1400.87	2017.82	1437.77	719.799	2740.1	714.28
Q4/1984	1984-12-31	7486.36	1238.64	1404.28	2034.81	1438	731.144	2744.83	715.192
Q1/1985	1985-03-31	7560.78	1249.09	1406.83	2023.71	1446.23	742.25	2812.1	723.173
Q2/1985	1985-06-30	7630	1275.7	1416.31	2044	1465.33	744.634	2869.04	722.494
Q3/1985	1985-09-30	7748.7	1276.91	1425.45	2070.62	1477.07	754.061	2906.59	729.984
Q4/1985	1985-12-31	7806.83	1280.01	1431.13	2083.04	1486.91	765.663	2945.2	738.368
Q1/1986	1986-03-31	7879.19	1294.59	1436.41	2071.13	1496.18	765.494	2956.91	740.45
Q2/1986	1986-06-30	7915.36	1304.07	1451.91	2094.96	1505.86	769.901	2949.64	758.084
Q3/1986	1986-09-30	7995.03	1309.76	1457.85	2110.42	1520.89	770.883	2966.92	752.74
Q4/1986	1986-12-31	8036.43	1332.88	1461.36	2131.47	1527.13	765.329	2990.32	757.548
Q1/1987	1987-03-31	8092.62	1344.77	1465.32	2077.97	1533.39	783.054	2988.18	773.064
Q2/1987	1987-06-30	8183.46	1364.19	1482.09	2124.62	1556.61	793.207	3050.8	784.63
Q3/1987	1987-09-30	8257.68	1397.18	1493.4	2139.33	1561.1	805.358	3111.82	800.834
Q4/1987	1987-12-31	8393.98	1412.99	1516.22	2173.55	1577.9	815.815	3191.95	817.217
Q1/1988	1988-03-31	8441.18	1438.55	1535.88	2153.84	1601.12	827.748	3268.14	819.844
Q2/1988	1988-06-30	8552.72	1447.15	1546.11	2192.89	1611.29	835.103	3263.37	829.873
Q3/1988	1988-09-30	8602.08	1469.29	1566.55	2217.73	1632.47	835.171	3336.18	844.834
Q4/1988	1988-12-31	8716.02	1481.95	1581.96	2243.85	1651.96	841.04	3371.33	842.94
Q1/1989	1989-03-31	8803.95	1488.4	1603.35	2267.3	1662.22	850.632	3462.29	862.817
Q2/1989	1989-06-30	8873.18	1498.11	1616.23	2276.43	1669.41	853.9	3417.09	871.308
Q3/1989	1989-09-30	8939.42	1499.51	1635.28	2297.21	1686.81	856.982	3476.87	882.981
Q4/1989	1989-12-31	8958.33	1500.86	1654.72	2323.83	1704.17	855.145	3584.6	881.515
Q1/1990	1990-03-31	9056.41	1511.09	1666.15	2372.07	1710.96	863.172	3567.54	889.237
Q2/1990	1990-06-30	9091.43	1518.87	1674.05	2383.73	1716.18	859.583	3680.06	904.351
Q3/1990	1990-09-30	9093.68	1503.11	1680.13	2433.93	1718.93	853.413	3741.77	901.652
Q4/1990	1990-12-31	9016.16	1498.07	1684.98	2476.78	1707.76	845.763	3734.66	935.749
Q1/1991	1991-03-31	8973.85	1493.86	1682.25	2548.49	1741.47	833.527	3767.2	917.767
Q2/1991	1991-06-30	9043.49	1492.04	1691.82	2537.91	1731.93	837.339	3811.89	928.957
Q3/1991	1991-09-30	9086.9	1488.63	1695.01	2525.08	1732.56	838.408	3803.45	935.973
Q4/1991	1991-12-31	9126.57	1491	1704.16	2557.8	1752.89	839.919	3830.17	940.629
Q1/1992	1992-03-31	9234.38	1490.88	1719.43	2598.77	1757.6	840.471	3831.36	950.014
Q2/1992	1992-06-30	9336.2	1489.06	1719.59	2581.77	1756.6	841.483	3844.77	937.626
Q3/1992	1992-09-30	9426.96	1498.6	1719.17	2574.08	1752.7	846.012	3849.3	938.225
Q4/1992	1992-12-31	9521.42	1509.12	1715.44	2568.62	1740.62	850.799	3824.76	932.112
Q1/1993	1993-03-31	9539.17	1520.17	1703.63	2546.01	1738.19	856.214	3867.86	923.415
Q2/1993	1993-06-30	9595.9	1527.89	1706.03	2547.29	1733.99	864.004	3843.37	923.353
Q3/1993	1993-09-30	9642.69	1540.19	1708.65	2565.25	1731.26	872.255	3815.78	934.462
Q4/1993	1993-12-31	9771.42	1550.67	1712.52	2563.65	1743.95	876.006	3839.82	937.984
Q1/1994	1994-03-31	9867.22	1569.54	1723.77	2595.01	1757.24	888.896	3871.57	945.742
Q2/1994	1994-06-30	10002.1	1587.76	1743.44	2603.99	1769.95	901.923	3851.38	947.815
Q3/1994	1994-09-30	10061.1	1605.79	1753.37	2623.55	1780.99	913.445	3900.31	955.341
Q4/1994	1994-12-31	10175.3	1614.94	1769.97	2658.2	1797.71	920.072	3882.46	958.916
Q1/1995	1995-03-31	10210.1	1620.13	1778.44	2646.09	1820.28	928.56	3921.44	969.164
Q2/1995	1995-06-30	10245.8	1625.98	1787.09	2669.18	1821.56	928.876	3969.99	975.829
Q3/1995	1995-09-30	10333.5	1641.95	1789.32	2678.16	1829.66	930.089	4014.2	980.471
Q4/1995	1995-12-31	10406.8	1646.57	1790.14	2676.88	1844.81	933.86	4023.8	987.378
Q1/1996	1996-03-31	10475.1	1661.42	1802.15	2650.1	1852.81	934.441	4061.5	993.75
Q2/1996	1996-06-30	10658	1666.71	1806.52	2687.95	1843.15	940.945	4107.56	1000.07
Q3/1996	1996-09-30	10756.6	1678.1	1817.41	2704.31	1847.31	949.201	4106.39	1009.82
Q4/1996	1996-12-31	10870.2	1694.07	1819.23	2719.38	1846.21	956.75	4153.69	1013.86
Q1/1997	1997-03-31	10953.1	1726.73	1826.07	2703.02	1851.18	969.373	4168.08	1025.4
Q2/1997	1997-06-30	11118.3	1741.99	1847.24	2741.2	1876.33	980.289	4137.03	1034.77
Q3/1997	1997-09-30	11259.9	1750.54	1860.61	2751.78	1887.64	992.001	4150.43	1045.23
Q4/1997	1997-12-31	11347.3	1768.69	1880.55	2771.35	1918.67	1001.51	4152.7	1060.33
Q1/1998	1998-03-31	11459.5	1782.13	1897.27	2793.56	1906.2	1015.55	4102.5	1070.87
Q2/1998	1998-06-30	11570.7	1798.29	1913.67	2784.58	1913.57	1015.99	4087.2	1078.96
Q3/1998	1998-09-30	11722	1811.7	1928.05	2791.96	1916.12	1025.42	4093.58	1091.9
Q4/1998	1998-12-31	11914.5	1829.32	1942.3	2791.31	1907.22	1039.27	4128.92	1103.37
Q1/1999	1999-03-31	12009.6	1839.66	1953.7	2813.69	1918.49	1058.11	4072.1	1112.31
Q2/1999	1999-06-30	12108.6	1840.8	1969.94	2819.78	1926.7	1066.99	4091.93	1129.08
Q3/1999	1999-09-30	12261	1873.65	1992.75	2849.29	1942.79	1083.61	4111.44	1142.57
Q4/1999	1999-12-31	12473.9	1899.41	2017.9	2884.9	1970.32	1099.02	4111.11	1156.01
Q1/2000	2000-03-31	12510.1	1915.44	2039.08	2912	1993.23	1116.56	4191.21	1174.45
Q2/2000	2000-06-30	12746.3	1927.15	2057.75	2941.51	2007.44	1129.86	4199.97	1188.86
Q3/2000	2000-09-30	12761.7	1932.56	2071.54	2937.34	2018.27	1141.27	4203.4	1201.77
Q4/2000	2000-12-31	12834.2	1935.77	2089.12	2939.59	2049.38	1143.3	4242.74	1215.03
Q1/2001	2001-03-31	12797.7	1961.34	2099.62	2987.62	2056.87	1149.25	4267.84	1227.15
Q2/2001	2001-06-30	12865.6	1976.77	2103.65	2990.19	2051.26	1152.22	4247.34	1236.91
Q3/2001	2001-09-30	12824.9	1991.5	2110.42	2981.53	2042.57	1151.35	4200.25	1249.22
Q4/2001	2001-12-31	12860.5	2000.37	2110.46	2985.06	2043.57	1158.41	4189.06	1258.07
Q1/2002	2002-03-31	12978.9	2009.87	2116.7	2975.84	2041.9	1175.66	4194.01	1265.23
Q2/2002	2002-06-30	13050.5	2023.13	2127.79	2983.53	2051.94	1182.36	4226.62	1274.75
Q3/2002	2002-09-30	13114	2038.46	2135.41	2997.65	2056.35	1192.7	4243.4	1282.46
Q4/2002	2002-12-31	13122.4	2056.74	2136.2	2991.23	2064.33	1199.3	4254.61	1292.09
Q1/2003	2003-03-31	13190.3	2070.26	2139.41	2954.99	2058.16	1205.91	4249.92	1304.84
Q2/2003	2003-06-30	13312.7	2089.86	2134.78	2955.63	2051.67	1204.12	4283.91	1313.7
Q3/2003	2003-09-30	13535.7	2111.23	2148.55	2970.38	2054.03	1208.66	4301.23	1322.72
Q4/2003	2003-12-31	13694	2128.29	2165.89	2981.29	2070.47	1216.95	4349.01	1336.3
Q1/2004	2004-03-31	13772.7	2139.93	2185.07	2980.57	2080.04	1225.72	4382.81	1344.42
Q2/2004	2004-06-30	13873.7	2148.13	2198.92	2990.83	2086.8	1240.21	4381.3	1354.85
Q3/2004	2004-09-30	13999.8	2151.68	2207.47	2985.38	2088.79	1254.96	4404.19	1368.5
Q4/2004	2004-12-31	14120.8	2157.1	2222.54	2988.27	2092.21	1263.97	4392.51	1376.92
Q1/2005	2005-03-31	14271.3	2177.55	2228.43	2982.49	2087	1268.28	4413.65	1390.84
Q2/2005	2005-06-30	14345.8	2201.7	2232.83	3002.38	2107.27	1277.31	4448.18	1405.02
Q3/2005	2005-09-30	14466.3	2227.46	2243.76	3026.76	2121.33	1293.03	4490.56	1418.34
Q4/2005	2005-12-31	14549	2260.83	2259.55	3038.31	2127.29	1305.83	4500.07	1433.18
Q1/2006	2006-03-31	14723.8	2266.85	2278.43	3066.61	2134.88	1316.3	4503.47	1448.7
Q2/2006	2006-06-30	14767.8	2271.9	2300.78	3115.69	2147.46	1316.93	4519.14	1463.83
Q3/2006	2006-09-30	14781	2273.36	2301.24	3146.81	2155.08	1320.59	4511.36	1478.28
Q4/2006	2006-12-31	14896.7	2281.38	2318.35	3187.86	2183.14	1325.58	4566.5	1492.32
Q1/2007	2007-03-31	14905.9	2304.08	2336.39	3200.93	2186.65	1334.15	4600.08	1507.58
Q2/2007	2007-06-30	15019.9	2320.7	2355.01	3224.67	2184.46	1347.02	4605.5	1519.81
Q3/2007	2007-09-30	15120.9	2340.36	2362.34	3251.94	2183.66	1352.62	4584.71	1532.14
Q4/2007	2007-12-31	15174.9	2359.83	2368.71	3260.92	2180.43	1354.51	4607.89	1545.32
Q1/2008	2008-03-31	15071.3	2368.23	2378.68	3289.55	2204.63	1355.32	4621.83	1552.37
Q2/2008	2008-06-30	15146.1	2350.7	2367.97	3280.57	2182.95	1360.02	4598.47	1553.24
Q3/2008	2008-09-30	15073.5	2311.99	2359.72	3268.7	2152.42	1371.36	4539.65	1541.5
Q4/2008	2008-12-31	14755	2261.78	2327.08	3205.5	2103.61	1355.5	4436.68	1525.97
Q1/2009	2009-03-31	14550.6	2224.18	2288.74	3061.72	2045.71	1324.53	4219.79	1501.57
Q2/2009	2009-06-30	14530.9	2219.96	2285.62	3063.97	2029.46	1309.92	4308.8	1487.03
Q3/2009	2009-09-30	14578.4	2223.12	2289.29	3082.25	2041.03	1315.85	4309.96	1482.4
Q4/2009	2009-12-31	14719.5	2230.82	2304.9	3110.48	2049.06	1331.39	4371.41	1481.47
Q1/2010	2010-03-31	14783.2	2240.88	2314.47	3133.33	2057.68	1347.25	4410.23	1485.94
Q2/2010	2010-06-30	14926	2260.12	2326.86	3197.49	2068.98	1354.18	4464.92	1488.65
Q3/2010	2010-09-30	15026.8	2273.19	2341.15	3223.47	2079.91	1363.85	4546.09	1489.37
Q4/2010	2010-12-31	15121.5	2276.15	2357.07	3250.41	2093.26	1379.27	4512.47	1489.35
Q1/2011	2011-03-31	15063.1	2293.22	2381.72	3307.83	2099.74	1389.46	4444.58	1483.98
Q2/2011	2011-06-30	15172.6	2296.6	2383.24	3313.6	2101.08	1392.1	4421.12	1476.87
Q3/2011	2011-09-30	15204.6	2302.78	2388.28	3329.32	2088.8	1411.42	4528.66	1470.86
Q4/2011	2011-12-31	15375.8	2306.61	2394.39	3329.96	2069.98	1422.58	4522	1462.14
Q1/2012	2012-03-31	15477.8	2321.55	2395.95	3340.47	2051.81	1423.03	4575.74	1449.45
Q2/2012	2012-06-30	15550.1	2320.3	2394.17	3343.68	2033	1427.73	4545.28	1435.66
Q3/2012	2012-09-30	15568.7	2347.93	2397.67	3351.37	2023.84	1430.54	4527.27	1425.05
Q4/2012	2012-12-31	15572.2	2342.56	2396.34	3336.3	2012.56	1432.29	4537.13	1411.13
Q1/2013	2013-03-31	15681.1	2357.7	2395.57	3328.92	1991.9	1447.05	4591.55	1406.29
Q2/2013	2013-06-30	15711.1	2370.63	2411.9	3358.43	1992.08	1456.43	4630.55	1405.11
Q3/2013	2013-09-30	15832.4	2391.88	2411.72	3375.43	1998.78	1468.36	4665.95	1404.15
Q4/2013	2013-12-31	15986.8	2403.08	2421.77	3389.23	1996.38	1483.16	4664.48	1408.16
Q1/2014	2014-03-31	15950	2423.22	2423.59	3419.06	1997.08	1485.01	4709.88	1413.72
Q2/2014	2014-06-30	16130.5	2443.39	2429.61	3413.28	1995.66	1502.81	4623.55	1419.19
Q3/2014	2014-09-30	16336.6	2460.51	2440.46	3424.19	2000.45	1513.75	4621.71	1428.84
Q4/2014	2014-12-31	16418.3	2476.89	2443.14	3454.66	2000.5	1520.63	4650.55	1439.56
Q1/2015	2015-03-31	16549.7	2487.88	2453.42	3458.51	2005.05	1517.59	4720.26	1454.7
Q2/2015	2015-06-30	16661.9	2502.03	2452.88	3473.91	2013.38	1515.39	4716.89	1467.05
Q3/2015	2015-09-30	16729.5	2512.86	2462.19	3485.13	2017.86	1523.96	4720.97	1480.83
Q4/2015	2015-12-31	16749.7	2531.54	2468.36	3499.89	2023.64	1525.54	4706.36	1494.41
Q1/2016	2016-03-31	16774	2539.75	2484.55	3522.02	2028.31	1534.95	4746.28	1505.61
Q2/2016	2016-06-30	16867	2543.72	2478.87	3538.38	2030.27	1530.92	4756.65	1517.46
Q3/2016	2016-09-30	16983.1	2555.72	2483.79	3550.25	2034.94	1547.02	4765.62	1528.29
Q4/2016	2016-12-31	17057.2	2574.67	2498.88	3565.01	2044.77	1555.6	4777.47	1538.72
Q1/2017	2017-03-31	17109.7	2584.76	2518.18	3597.08	2055.14	1570.96	4809.68	1550.82
Q2/2017	2017-06-30	17239.1	2590.26	2534.76	3619.86	2063.23	1588.57	4835.06	1564.23
Q3/2017	2017-09-30	17373.5	2599.36	2552.05	3646.48	2070.31	1595.08	4859.03	1575.12
Q4/2017	2017-12-31	17497.6	2608.6	2569.32	3668.61	2077.59	1601.86	4871.43	1585.77
Q1/2018	2018-03-31	17584	2614.73	2573.4	3679.52	2083.44	1607.2	4864.1	1596.81

## Sheet: GDP Deflator
		GDP Deflator Index									Q1/1960 !Q	.excel_last	B111GDP@OECDNAQ	B112GDP@OECDNAQ	B132GDP@OECDNAQ	B134GDP@OECDNAQ	B136GDP@OECDNAQ	B156GDP@OECDNAQ	B158GDP@OECDNAQ	B184GDP@OECDNAQ
		United States: Gross Domestic Product Implicit Deflator	United Kingdom: Gross Domestic Product Implicit Deflator	France: Gross Domestic Product Implicit Deflator	Germany: Gross Domestic Product Implicit Deflator	Italy: Gross Domestic Product Implicit Deflator	Canada: Gross Domestic Product Implicit Deflator	Japan: Gross Domestic Product Implicit Deflator	Spain: Gross Domestic Product Implicit Deflator		.DESC		United States: Gross Domestic Product (SAAR, Mil.US$, PPP)	United Kingdom: Gross Domestic Product (SAAR, Mil.US$, PPP)	France: Gross Domestic Product (SAAR, Mil.US$, PPP)	Germany: Gross Domestic Product (SAAR, Mil.US$, PPP)	Italy: Gross Domestic Product (SAAR, Mil.US$, PPP)	Canada: Gross Domestic Product (SAAR, Mil.US$, PPP)	Japan: Gross Domestic Product (SAAR, Bil.US$, PPP)	Spain: Gross Domestic Product (SAAR, Mil.US$, PPP)
											.T1		Q1-1947	Q1-1955	Q1-1960	Q1-1960	Q1-1960	Q1-1960	Q1-1960	Q1-1960
											.TN		Q1-2018	Q1-2018	Q1-2018	Q1-2018	Q1-2018	Q1-2018	Q1-2018	Q1-2018
											.LSOURCE		Organization for Economic Cooperation & Development	Organization for Economic Cooperation & Development	Organization for Economic Cooperation & Development	Organization for Economic Cooperation & Development	Organization for Economic Cooperation & Development	Organization for Economic Cooperation & Development	Organization for Economic Cooperation & Development	Organization for Economic Cooperation & Development
											.DTLM		Jun-29-2018 05:33	Jul-02-2018 06:06	Jun-26-2018 05:33	Jun-20-2018 10:29	Jun-20-2018 10:29	Jun-20-2018 10:29	Jun-20-2018 10:30	Jun-20-2018 10:30
Q1/1960	22006	17.3974	17.4871	15.8701	17.3613	15.9884	17.2491	17.1287	15.0254		Q1/1960	22006	543347	114863	84609.6	154069	84190.5	46336	94.76	34477.7
Q2/1960	22097	17.4428	17.5591	15.9299	17.3796	16.0244	17.2736	17.1694	15.0791		Q2/1960	22097	542697	114509	85247.6	156975	85618.6	45509.4	95.16	35312.3
Q3/1960	22189	17.5058	17.6102	15.9929	17.3623	16.0889	17.323	17.2236	15.1508		Q3/1960	22189	546012	116585	86225.4	162240	87225.6	46336	98.74	36472.7
Q4/1960	22281	17.5596	17.6825	16.0439	17.3234	16.1332	17.376	17.2681	15.2068		Q4/1960	22281	541063	117778	87526	163531	87532.7	46631.5	102.8	37344.4
Q1/1961	22371	17.5986	17.716	16.081	17.2319	16.1735	17.387	17.2936	15.2374		Q1/1961	22371	545949	119923	89138.9	164313	90895.4	46472.2	106.08	38489.3
Q2/1961	22462	17.6407	17.7241	16.1085	17.1865	16.2126	17.4198	17.3315	15.2693		Q2/1961	22462	557430	120461	90720.4	162997	93042.9	47730.9	108.58	40282.7
Q3/1961	22554	17.6875	17.8347	16.1514	17.1868	16.2496	17.4613	17.3813	15.2967		Q3/1961	22554	568228	120579	92410.5	166345	95428.5	49000.2	110.98	41179.3
Q4/1961	22646	17.7449	17.8544	16.2028	17.2341	16.2986	17.5129	17.4469	15.3448		Q4/1961	22646	581624	120519	94279.3	167562	97547.4	49833.1	116.51	42474.3
Q1/1962	22736	17.8371	17.936	16.2943	17.3527	16.3871	17.5914	17.5554	15.4222		Q1/1962	22736	595176	121642	96519.2	171202	99528.5	51381.9	118.81	43698.4
Q2/1962	22827	17.8664	17.9868	16.3189	17.4021	16.4196	17.6195	17.5977	15.4532		Q2/1962	22827	602580	123120	98226.7	173478	100800	51838.1	120.76	44804.7
Q3/1962	22919	17.9033	18.0242	16.3476	17.4495	16.4494	17.6637	17.6386	15.4866		Q3/1962	22919	609575	124125	99816	178117	101589	52650	122.52	46001.4
Q4/1962	23011	17.9382	18.0767	16.3751	17.4854	16.4778	17.7057	17.6696	15.5221		Q4/1962	23011	613132	124038	101235	178098	103292	53848.1	125.3	46230.3
Q1/1963	23101	18.017	18.1215	16.4439	17.5554	16.5535	17.7939	17.7346	15.5862		Q1/1963	23101	622679	124987	99967.5	172556	104456	54441	127.48	49091.9
Q2/1963	23192	18.0467	18.1668	16.4809	17.5796	16.5792	17.8332	17.7533	15.6151		Q2/1963	23192	631835	130673	104666	180543	107486	55361	131.37	49223.8
Q3/1963	23284	18.0688	18.1974	16.5007	17.5986	16.5945	17.8623	17.7701	15.635		Q3/1963	23284	644960	131559	108249	187009	109351	55877.5	135.35	50350
Q4/1963	23376	18.2156	18.3439	16.6245	17.7407	16.7335	18.0014	17.9144	15.7544		Q4/1963	23376	654840	135563	109401	189431	111401	58081.4	141.15	51679
Q1/1964	23467	18.274	18.3785	16.6847	17.7994	16.7922	18.0409	17.9755	15.8023		Q1/1964	23467	671149	136636	111864	192672	113448	59651.4	146.15	52129.1
Q2/1964	23558	18.3178	18.4429	16.7247	17.8433	16.8353	18.087	18.0217	15.8363		Q2/1964	23558	680757	139482	113207	195507	112589	60010.1	150.06	53102.3
Q3/1964	23650	18.3922	18.53	16.7978	17.9168	16.9021	18.1644	18.1011	15.9091		Q3/1964	23650	692807	140693	115096	198353	112845	60900.5	153.05	53747.1
Q4/1964	23742	18.4758	18.611	16.8799	17.9988	16.9829	18.2517	18.1895	15.9917		Q4/1964	23742	698424	143458	116704	201971	112910	61516.1	155.72	55200.8
Q1/1965	23832	18.5687	18.7164	16.9682	18.0896	17.0693	18.3469	18.2862	16.0599		Q1/1965	23832	719248	143868	117575	206312	115016	63779.4	157.82	56616.2
Q2/1965	23923	18.6525	18.7805	17.0366	18.1717	17.1374	18.4439	18.3742	16.1335		Q2/1965	23923	732369	144515	120986	210518	117777	64718.1	160.56	57118
Q3/1965	24015	18.7259	18.8607	17.1039	18.2439	17.2072	18.5238	18.4471	16.2013		Q3/1965	24015	750184	146338	123220	212763	119832	65876.4	164.85	57942.1
Q4/1965	24107	18.8534	18.986	17.2171	18.3691	17.3264	18.6525	18.5746	16.3107		Q4/1965	24107	773104	148222	125761	215504	122476	67965.5	168.57	60077.1
Q1/1966	24197	18.9755	19.1115	17.3299	18.4895	17.4422	18.7774	18.6872	16.412		Q1/1966	24197	797328	149448	127728	220856	124486	69728.9	174.13	60038.8
Q2/1966	24288	19.131	19.2661	17.4747	18.6413	17.585	18.9301	18.8346	16.5542		Q2/1966	24288	807153	151532	130743	223354	127293	71776.4	182.37	63688.6
Q3/1966	24380	19.3168	19.4613	17.6415	18.8219	17.7522	19.1115	19.0146	16.702		Q3/1966	24380	820798	153572	133496	225795	132134	72436.4	188.59	65531.7
Q4/1966	24472	19.4809	19.6404	17.7927	18.9801	17.8959	19.2643	19.1749	16.8412		Q4/1966	24472	834864	154338	135375	224137	133842	73896.6	193.98	66257.1
Q1/1967	24562	19.5622	19.7079	17.8699	19.0573	17.9769	19.3479	19.2519	16.9197		Q1/1967	24562	846046	156976	138293	223928	137130	74045	199.92	66749.2
Q2/1967	24653	19.6608	19.8253	17.9592	19.1541	18.0726	19.4458	19.3495	17.0099		Q2/1967	24653	851058	160128	140505	224363	140825	75981.1	206.34	67911.4
Q3/1967	24745	19.8488	19.9992	18.134	19.3406	18.2411	19.622	19.5349	17.163		Q3/1967	24745	866614	162243	143229	232017	144328	76924.8	215.54	69698
Q4/1967	24837	20.0672	20.2234	18.3215	19.5601	18.4387	19.8375	19.7503	17.3757		Q4/1967	24837	883201	164936	146120	237668	148774	78063.9	222.13	70054.2
Q1/1968	24928	20.2899	20.448	18.5183	19.787	18.6514	20.0601	19.9735	17.5691		Q1/1968	24928	911135	172831	151987	243238	150857	79580.6	230	72345.3
Q2/1968	25019	20.504	20.6775	18.7398	20.0022	18.8499	20.2618	20.1863	17.7529		Q2/1968	25019	936297	174014	142145	247795	155656	82563.4	240.38	75320.1
Q3/1968	25111	20.7063	20.8703	18.907	20.2018	19.0323	20.4583	20.3839	17.9127		Q3/1968	25111	952347	179131	159724	255762	160941	84490	248.23	76610.9
Q4/1968	25203	20.9995	21.1591	19.1782	20.4859	19.2909	20.7414	20.6689	18.156		Q4/1968	25203	970129	182337	163675	263274	166946	86839.9	266.04	80799.4
Q1/1969	25293	21.217	21.3749	19.3953	20.6918	19.4895	20.9585	20.8806	18.3522		Q1/1969	25293	995419	183787	165833	272611	171307	88885.9	271.13	84569.9
Q2/1969	25384	21.4879	21.628	19.6235	20.9499	19.7406	21.2318	21.143	18.5784		Q2/1969	25384	1011361	187322	171899	279553	176647	90477.7	282.53	85323
Q3/1969	25476	21.7903	21.9578	19.8933	21.2384	20.0307	21.533	21.4399	18.863		Q3/1969	25476	1032016	191251	175911	289491	179671	92728.8	293.36	88246.1
Q4/1969	25568	22.0709	22.3114	20.1474	21.5057	20.289	21.8236	21.7156	19.1011		Q4/1969	25568	1040741	195326	179565	297640	178310	95303.8	308.73	90360.6
Q1/1970	25658	22.3817	22.7537	20.4284	21.8024	20.5601	22.1574	22.0262	19.3856		Q1/1970	25658	1053528	197925	185549	296930	191527	97372.6	322.74	93421
Q2/1970	25749	22.6938	23.1331	20.7222	22.1018	20.8722	22.4799	22.3427	19.6495		Q2/1970	25749	1070110	205970	190593	312975	195854	98749.2	331.35	94843.1
Q3/1970	25841	22.8803	23.3877	20.914	22.2814	21.0405	22.6833	22.5436	19.8096		Q3/1970	25841	1088461	210302	195007	321413	201394	100659	343.29	96104.4
Q4/1970	25933	23.1819	23.7299	21.2107	22.5742	21.296	22.9859	22.8634	20.0639		Q4/1970	25933	1091462	215244	200878	328397	204068	102174	347.04	98106.4
Q1/1971	26023	23.5361	24.0868	21.5926	22.9227	21.5997	23.3523	23.2485	20.376		Q1/1971	26023	1137812	217190	204760	327060	205895	103181	356.1	100410
Q2/1971	26114	23.8456	24.392	21.892	23.2255	21.8627	23.6624	23.5805	20.6293		Q2/1971	26114	1159355	223871	211381	338335	209282	107608	367.01	103642
Q3/1971	26206	24.0884	24.6374	22.135	23.4631	22.0842	23.8967	23.8323	20.8355		Q3/1971	26206	1180313	230058	217212	347709	214499	111669	375.45	106604
Q4/1971	26298	24.2883	24.8779	22.3217	23.6581	22.2958	24.1006	24.0324	21.0112		Q4/1971	26298	1193585	233223	220921	350303	217777	113901	382.05	109667
Q1/1972	26389	24.6642	25.269	22.659	24.0243	22.6899	24.4715	24.3956	21.3451		Q1/1972	26389	1233807	237138	227197	356085	224075	115203	400.46	113218
Q2/1972	26480	24.8155	25.4633	22.8145	24.172	22.8523	24.6147	24.5327	21.4727		Q2/1972	26480	1270122	245357	229635	364126	225576	119172	410.29	116586
Q3/1972	26572	25.048	25.7298	23.0626	24.3999	23.0652	24.8412	24.7465	21.6698		Q3/1972	26572	1293837	248599	234193	376144	230747	120542	422.7	120241
Q4/1972	26664	25.3661	26.1384	23.3846	24.7117	23.3622	25.1475	25.0461	21.9367		Q4/1972	26664	1332023	256498	241405	386870	234829	124948	438.58	124133
Q1/1973	26754	25.6609	26.4434	23.7106	25.0025	23.6644	25.4302	25.3164	22.1809		Q1/1973	26754	1380680	272350	249647	396834	240011	129684	458.14	127825
Q2/1973	26845	26.0516	26.7784	24.1431	25.3847	24.034	25.8184	25.6849	22.5229		Q2/1973	26845	1417595	276193	256948	405877	251064	133100	469.06	132110
Q3/1973	26937	26.5491	27.3902	24.6954	25.87	24.4813	26.3045	26.1633	22.9662		Q3/1973	26937	1436813	279800	265082	414992	263874	136066	479.19	136935
Q4/1973	27029	27.0774	28.0253	25.2955	26.3845	24.9133	26.8317	26.6718	23.4387		Q4/1973	27029	1479069	285072	274995	424299	275090	141407	494.54	142051
Q1/1974	27119	27.5919	28.607	25.8884	26.8846	25.4211	27.345	27.1673	23.9053		Q1/1974	27119	1494654	283059	284140	435997	282973	145162	486.42	147340
Q2/1974	27210	28.2481	29.38	26.5621	27.5232	26.0304	27.9962	27.8137	24.4647		Q2/1974	27210	1534220	294902	292995	446012	292522	150263	501.58	152693
Q3/1974	27302	29.0667	30.248	27.3241	28.3212	26.7859	28.8289	28.6373	25.1394		Q3/1974	27302	1563396	305583	304244	458943	301514	154551	523.04	158012
Q4/1974	27394	29.9227	31.1453	28.0676	29.1569	27.5367	29.6839	29.5102	25.8754		Q4/1974	27394	1603004	310079	307803	466519	303487	158391	536.06	162745
Q1/1975	27484	30.6014	31.8652	28.5735	29.8207	28.1206	30.3869	30.228	26.4761		Q1/1975	27484	1619553	317403	311941	474387	304530	161045	549.82	165688
Q2/1975	27575	31.0592	32.3879	28.9083	30.268	28.5141	30.8696	30.7133	26.8947		Q2/1975	27575	1656448	317334	316393	479085	308632	165743	571.05	168167
Q3/1975	27667	31.6124	32.9746	29.3728	30.806	28.9966	31.4334	31.283	27.3752		Q3/1975	27667	1713812	321993	322723	492905	318317	171921	588.26	171920
Q4/1975	27759	32.1393	33.5652	29.8513	31.3169	29.4485	31.9388	31.811	27.8145		Q4/1975	27759	1765867	331461	332408	510927	326898	176701	604.48	175906
Q1/1976	27850	32.4733	33.9584	30.2003	31.6379	29.7534	32.2448	32.1298	28.0957		Q1/1976	27850	1824509	340731	341230	520801	336102	181494	615.71	179450
Q2/1976	27941	32.8027	34.3279	30.5556	31.9567	30.1517	32.572	32.4469	28.3766		Q2/1976	27941	1856944	343828	349361	533863	346758	187299	625.46	183337
Q3/1976	28033	33.2265	34.7691	30.9948	32.3691	30.5739	32.9622	32.8657	28.7425		Q3/1976	28033	1890500	352580	356058	540914	360549	190368	642.44	187502
Q4/1976	28125	33.8148	35.4019	31.5692	32.9436	31.1627	33.5465	33.4531	29.2451		Q4/1976	28125	1938413	366571	367176	560708	373868	194152	654.7	192246
Q1/1977	28215	34.3592	35.9772	32.1019	33.4775	31.7133	34.1038	33.9976	29.7093		Q1/1977	28215	1992534	372713	377498	574661	380624	200105	679.91	196844
Q2/1977	28306	34.8416	36.5126	32.5933	33.9513	32.1829	34.6018	34.483	30.1361		Q2/1977	28306	2060165	375516	384943	586098	384110	204180	694.47	200578
Q3/1977	28398	35.2699	36.9639	33.0391	34.3723	32.5637	35.0525	34.9143	30.5262		Q3/1977	28398	2122387	382792	391997	593195	385019	207835	707.95	203850
Q4/1977	28490	36.036	37.7689	33.7972	35.1225	33.2123	35.8108	35.6863	31.1832		Q4/1977	28490	2168716	397909	401908	616571	396052	215713	733.42	209628
Q1/1978	28580	36.5729	38.4101	34.3444	35.6495	33.6623	36.3623	36.23	31.6605		Q1/1978	28580	2208688	408155	414089	628401	407979	220909	758.66	214165
Q2/1978	28671	37.2424	39.1439	35.0137	36.3029	34.2395	37.0474	36.9005	32.2431		Q2/1978	28671	2336563	420982	429177	642455	422152	227136	780.21	218548
Q3/1978	28763	37.8651	39.7875	35.6447	36.9082	34.7818	37.6791	37.5144	32.7921		Q3/1978	28763	2398866	433693	436526	661732	431096	232674	803.45	221996
Q4/1978	28855	38.6614	40.6334	36.4132	37.679	35.5017	38.4754	38.299	33.4753		Q4/1978	28855	2482159	446953	449734	683450	446723	239611	832.09	226286
Q1/1979	28945	39.3525	41.4071	37.0808	38.3447	36.182	39.1685	38.9682	34.0679		Q1/1979	28945	2531555	453675	461918	696384	462477	246025	859.29	229925
Q2/1979	29036	40.3041	42.3791	37.9688	39.2677	37.1063	40.1276	39.9034	34.8769		Q2/1979	29036	2595909	484909	477501	735293	477740	255470	895.99	235751
Q3/1979	29128	41.1649	43.4145	38.7702	40.1071	37.9731	40.9823	40.7488	35.6263		Q3/1979	29128	2670388	485898	493154	751011	497360	262600	921.95	241396
Q4/1979	29220	41.986	44.3005	39.5273	40.9123	38.8032	41.798	41.5572	36.3549		Q4/1979	29220	2730705	501019	503740	770784	520196	269627	944.33	247198
Q1/1980	29311	42.8594	45.2516	40.3258	41.7743	39.7205	42.65	42.4212	37.1486		Q1/1980	29311	2796523	506801	519666	793330	531516	277068	967.65	254287
Q2/1980	29402	43.8	46.3057	41.1688	42.6969	40.6058	43.5652	43.3449	37.9455		Q2/1980	29402	2799938	508340	527492	805631	547578	282920	983.51	260624
Q3/1980	29494	44.8082	47.4414	42.1126	43.6795	41.5424	44.5319	44.3441	38.8239		Q3/1980	29494	2860044	520161	539581	820901	560677	288806	1028.72	265600
Q4/1980	29586	46.0461	48.8685	43.2601	44.8795	42.6566	45.7134	45.5727	39.8774		Q4/1980	29586	2993525	530119	553950	842334	580623	300606	1079.69	274389
Q1/1981	29676	47.1962	50.1996	44.3328	45.9878	43.7131	46.7873	46.7168	40.8572		Q1/1981	29676	3131799	543697	569640	873406	591608	314506	1113.58	279539
Q2/1981	29767	48.0816	51.2182	45.1503	46.8422	44.546	47.6205	47.5968	41.6552		Q2/1981	29767	3167251	556076	583000	887413	604056	323638	1148.44	284684
Q3/1981	29859	48.9462	52.2052	45.963	47.6796	45.3472	48.4513	48.4576	42.4		Q3/1981	29859	3261203	572956	598253	905656	615205	326334	1166.61	291062
Q4/1981	29951	49.8631	53.283	46.8394	48.5721	46.2058	49.3282	49.3707	43.1923		Q4/1981	29951	3283536	585458	612973	921881	631942	330726	1197.27	296206
Q1/1982	30041	50.5612	54.11	47.5338	49.2559	46.858	50.062	50.0698	43.7919		Q1/1982	30041	3273809	595474	626999	938361	640608	331653	1232.83	301554
Q2/1982	30132	51.17	54.7867	48.1125	49.8525	47.418	50.6839	50.6827	44.3196		Q2/1982	30132	3331281	609698	639043	943882	646422	331903	1256.49	306347
Q3/1982	30224	51.9068	55.6232	48.7969	50.5729	48.1063	51.4078	51.42	44.9515		Q3/1982	30224	3367072	620641	648487	948057	655455	333675	1280.34	312806
Q4/1982	30316	52.4836	56.3274	49.3172	51.1366	48.6725	51.9865	51.9982	45.4638		Q4/1982	30316	3407810	632930	659321	960920	661241	334317	1312.73	317486
Q1/1983	30406	52.9073	56.8801	49.7114	51.5507	49.0258	52.3803	52.4143	45.8444		Q1/1983	30406	3480321	650712	667272	977481	667904	342390	1324.07	321314
Q2/1983	30497	53.2656	57.289	50.0515	51.9005	49.3592	52.7316	52.7655	46.1607		Q2/1983	30497	3583844	660979	671913	994475	671636	351536	1342.96	325529
Q3/1983	30589	53.8231	57.9222	50.5797	52.4447	49.8596	53.305	53.318	46.6307		Q3/1983	30589	3692257	675644	680043	1.00281e+06	691080	359385	1377.33	329327
Q4/1983	30681	54.219	58.3798	50.9491	52.8309	50.2684	53.6946	53.7017	46.9703		Q4/1983	30681	3796121	686871	688228	1.02417e+06	712192	366617	1398.8	333869
Q1/1984	30772	54.7964	58.9693	51.4853	53.3928	50.811	54.2632	54.2635	47.4711		Q1/1984	30772	3912774	698589	700130	1.04875e+06	718467	376854	1429.71	340220
Q2/1984	30863	55.2575	59.5273	51.91	53.8412	51.2332	54.7191	54.7122	47.8792		Q2/1984	30863	4015000	699050	707967	1.0409e+06	726769	387453	1463.36	342087
Q3/1984	30955	55.7056	60.0008	52.3207	54.277	51.6372	55.1648	55.1538	48.2576		Q3/1984	30955	4087378	709195	717598	1.0779e+06	741125	392267	1493.2	347793
Q4/1984	31047	56.0792	60.4215	52.6607	54.6405	51.987	55.532	55.5223	48.598		Q4/1984	31047	4147606	728354	724015	1.09425e+06	746265	401102	1505.77	350693
Q1/1985	31137	56.7241	60.8613	53.2672	55.2676	52.574	56.1529	56.1722	49.1498		Q1/1985	31137	4237010	739845	733684	1.10078e+06	759006	411747	1560.73	358633
Q2/1985	31228	57.0756	61.3299	53.6142	55.6075	52.9077	56.5286	56.527	49.4546		Q2/1985	31228	4302297	761426	743442	1.11865e+06	773913	415834	1602.39	360518
Q3/1985	31320	57.4065	61.7064	53.9351	55.9272	53.2123	56.8478	56.8598	49.7387		Q3/1985	31320	4394563	766826	752713	1.13973e+06	784603	423476	1632.92	366349
Q4/1985	31412	57.7381	62.2934	54.2425	56.2466	53.5275	57.1733	57.1893	49.9937		Q4/1985	31412	4453105	776001	760023	1.15312e+06	794514	432454	1664.2	372455
Q1/1986	31502	58.0203	62.4238	54.5091	56.517	53.7907	57.4576	57.467	50.2721		Q1/1986	31502	4516344	786485	766575	1.15203e+06	803396	434508	1678.93	375586
Q2/1986	31593	58.2526	62.7075	54.7282	56.7408	54.0051	57.6781	57.6903	50.4606		Q2/1986	31593	4555245	795842	777961	1.1699e+06	811816	438687	1681.31	385972
Q3/1986	31685	58.4873	62.9902	54.9552	56.9697	54.218	57.9171	57.9209	50.662		Q3/1986	31685	4619627	802920	784385	1.1833e+06	823151	441066	1697.92	384781
Q4/1986	31777	58.8129	63.3094	55.2581	57.2891	54.5246	58.246	58.2441	50.958		Q4/1986	31777	4669396	821230	790606	1.2018e+06	831205	440375	1720.86	389502
Q1/1987	31867	59.2404	63.7239	55.6412	57.7099	54.9174	58.6556	58.6696	51.2864		Q1/1987	31867	4736231	833981	798244	1.18024e+06	840622	453742	1732.19	400041
Q2/1987	31958	59.637	64.1761	56.0042	58.0995	55.2892	59.0516	59.0647	51.645		Q2/1987	31958	4821459	852033	812652	1.21488e+06	859130	462729	1780.4	408864
Q3/1987	32050	60.07	64.5628	56.4123	58.5237	55.6857	59.4742	59.4911	52.0432		Q3/1987	32050	4900509	877891	824820	1.23222e+06	867788	473180	1829.12	420526
Q4/1987	32142	60.5677	65.0595	56.8758	59.0105	56.1547	59.9693	59.9851	52.4893		Q4/1987	32142	5022670	894657	844303	1.26235e+06	884513	483313	1891.8	432807
Q1/1988	32233	61.0438	65.5804	57.32	59.474	56.6011	60.4502	60.4544	52.8828		Q1/1988	32233	5090615	918131	861930	1.26072e+06	904665	494315	1952.11	437454
Q2/1988	32324	61.6335	66.1213	57.8751	60.0481	57.1408	61.0239	61.0393	53.404		Q2/1988	32324	5207707	931243	876071	1.29597e+06	919094	503441	1968.12	447169
Q3/1988	32416	62.3598	66.9279	58.5556	60.7542	57.8069	61.7529	61.7564	54.0188		Q3/1988	32416	5299486	957019	898094	1.32607e+06	942024	509497	2035.67	460472
Q4/1988	32508	62.8595	67.3155	59.0269	61.2392	58.2867	62.2564	62.244	54.4655		Q4/1988	32508	5412713	970856	914225	1.35239e+06	961184	517260	2073.36	463238
Q1/1989	32598	63.5498	68.1228	59.6706	61.9083	58.9732	62.9138	62.9196	55.059		Q1/1989	32598	5527352	986775	936693	1.38146e+06	978546	528684	2152.41	479329
Q2/1989	32689	64.207	68.7095	60.2872	62.5467	59.5586	63.5814	63.5593	55.6247		Q2/1989	32689	5628429	1.00177e+06	953973	1.40132e+06	992532	536347	2145.91	489019
Q3/1989	32781	64.6725	69.3429	60.726	63.0011	59.9417	64.0516	64.0108	56.0308		Q3/1989	32781	5711556	1.01194e+06	972241	1.42439e+06	1.00933e+06	542263	2198.96	499189
Q4/1989	32873	65.1223	69.7183	61.1422	63.4422	60.287	64.4937	64.4474	56.4178		Q4/1989	32873	5763444	1.01834e+06	990546	1.45099e+06	1.02559e+06	544835	2282.56	501802
Q1/1990	32963	65.8408	70.5039	61.802	64.1477	60.9135	65.1955	65.1554	57.0354		Q1/1990	32963	5890835	1.03683e+06	1.00815e+06	1.49758e+06	1.04038e+06	555935	2296.65	511739
Q2/1990	33054	66.5205	71.3176	62.4304	64.8121	61.3765	65.8719	65.8279	57.6107		Q2/1990	33054	5974665	1.0542e+06	1.02323e+06	1.52053e+06	1.05148e+06	559367	2393.54	525686
Q3/1990	33146	67.1145	72.0492	62.9749	65.3898	61.8639	66.4689	66.4214	58.1214		Q3/1990	33146	6029504	1.05396e+06	1.0359e+06	1.56639e+06	1.06153e+06	560385	2455.62	528764
Q4/1990	33238	67.6223	72.603	63.4496	65.8807	62.3115	66.9739	66.9257	58.5711		Q4/1990	33238	6023332	1.05851e+06	1.04672e+06	1.60593e+06	1.06227e+06	559581	2469.56	553005
Q1/1991	33328	68.2968	73.3423	64.0826	66.5304	63.0307	67.6437	67.6057	59.1495		Q1/1991	33328	6054867	1.06628e+06	1.05545e+06	1.66872e+06	1.09573e+06	557000	2516.39	547734
Q2/1991	33419	68.7641	73.8893	64.5301	66.9834	63.4081	68.1061	68.0764	59.5653		Q2/1991	33419	6143612	1.07292e+06	1.06887e+06	1.6731e+06	1.09626e+06	563373	2563.97	558310
Q3/1991	33511	69.269	74.425	65.0072	67.4735	63.9051	68.5942	68.5835	60.0056		Q3/1991	33511	6218425	1.07823e+06	1.0788e+06	1.67683e+06	1.10525e+06	568134	2577.35	566685
Q4/1991	33603	69.643	74.8991	65.3563	67.8402	64.272	68.9531	68.9525	60.3578		Q4/1991	33603	6279296	1.08682e+06	1.09045e+06	1.70778e+06	1.12464e+06	572137	2609.42	572847
Q1/1992	33694	69.9426	75.0941	65.6426	68.1351	64.5838	69.2579	69.2497	60.6351		Q1/1992	33694	6380798	1.08957e+06	1.10504e+06	1.74269e+06	1.13314e+06	575043	2621.48	581220
Q2/1992	33785	70.3886	75.5593	66.0512	68.5721	64.9353	69.7059	69.6905	60.9996		Q2/1992	33785	6492299	1.09498e+06	1.11202e+06	1.74239e+06	1.13865e+06	579460	2647.4	577090
Q3/1992	33877	70.723	75.7028	66.371	68.8991	65.2652	70.0458	70.026	61.2981		Q3/1992	33877	6586548	1.10409e+06	1.11713e+06	1.74548e+06	1.1419e+06	585419	2663.28	580284
Q4/1992	33969	71.2014	76.1258	66.8224	69.3651	65.6694	70.5123	70.5039	61.6716		Q4/1992	33969	6697553	1.11805e+06	1.12229e+06	1.75356e+06	1.14105e+06	592652	2664.36	580016
Q1/1993	34059	71.6062	76.47	67.2298	69.758	66.0711	70.9128	70.9067	62.0261		Q1/1993	34059	6748182	1.13133e+06	1.12136e+06	1.74797e+06	1.14643e+06	599813	2709.78	577908
Q2/1993	34150	72.0417	77.0041	67.6411	70.1819	66.4756	71.3563	71.3477	62.4076		Q2/1993	34150	6829594	1.14502e+06	1.12981e+06	1.75948e+06	1.15066e+06	609055	2709.37	581423
Q3/1993	34242	72.4754	77.6904	68.0389	70.6042	66.8749	71.7565	71.7782	62.8005		Q3/1993	34242	6904222	1.16452e+06	1.1382e+06	1.78255e+06	1.15575e+06	618319	2706.15	592123
Q4/1993	34334	72.8531	78.4877	68.3693	70.9733	67.2146	72.1471	72.1557	63.1428		Q4/1993	34334	7032844	1.18448e+06	1.14632e+06	1.79075e+06	1.17014e+06	624360	2737.52	597593
Q1/1994	34424	73.2066	79.6214	68.6822	71.3199	67.5621	72.4983	72.5119	63.4339		Q1/1994	34424	7136259	1.21621e+06	1.15913e+06	1.8215e+06	1.18514e+06	636630	2773.78	605314
Q2/1994	34515	73.5715	79.7343	69.0094	71.6747	67.8936	72.8408	72.871	63.7588		Q2/1994	34515	7269847	1.23207e+06	1.17794e+06	1.8369e+06	1.19958e+06	649011	2772.98	609748
Q3/1994	34607	73.9693	79.0401	69.3911	72.059	68.239	73.2519	73.2677	64.0974		Q3/1994	34607	7352255	1.23522e+06	1.1912e+06	1.86062e+06	1.2132e+06	661013	2823.5	617853
Q4/1994	34699	74.3763	77.6267	69.8088	72.45	68.5956	73.6529	73.6659	64.4297		Q4/1994	34699	7476661	1.22004e+06	1.20972e+06	1.89542e+06	1.23099e+06	669454	2825.85	623381
Q1/1995	34789	74.8034	75.4265	70.2627	72.8575	68.9566	74.0778	74.0873	64.8142		Q1/1995	34789	7545296	1.18927e+06	1.22341e+06	1.8974e+06	1.253e+06	679526	2870.55	633803
Q2/1995	34880	75.1321	74.2239	70.5545	73.1819	69.2865	74.4056	74.4098	65.0882		Q2/1995	34880	7604923	1.17453e+06	1.23447e+06	1.92248e+06	1.25988e+06	682765	2918.74	640858
Q3/1995	34972	75.4896	73.9839	70.7885	73.5457	69.6426	74.7529	74.7607	65.4		Q3/1995	34972	7706531	1.18223e+06	1.2401e+06	1.93854e+06	1.27199e+06	686849	2965.16	646993
Q4/1995	35064	75.8617	74.6389	70.97	73.9356	70.0515	75.1206	75.1284	65.7494		Q4/1995	35064	7799493	1.19606e+06	1.24386e+06	1.94788e+06	1.29006e+06	693026	2986.87	655031
Q1/1996	35155	76.2723	76.171	71.3795	74.3755	70.4426	75.5178	75.5424	66.1406		Q1/1996	35155	7893146	1.23162e+06	1.25942e+06	1.93987e+06	1.30288e+06	697123	3031.47	663181
Q2/1996	35246	76.5627	77.4178	71.7982	74.6055	70.7049	75.8048	75.8303	66.4319		Q2/1996	35246	8061535	1.25576e+06	1.26989e+06	1.97366e+06	1.30092e+06	704644	3077.53	670340
Q3/1996	35338	76.7785	78.2352	71.958	74.6689	70.8702	76.0326	76.0446	66.6643		Q3/1996	35338	8159043	1.27769e+06	1.28038e+06	1.98736e+06	1.3069e+06	712961	3085.35	679239
Q4/1996	35430	77.168	78.6679	72.313	74.8056	71.1555	76.4346	76.4335	67.0286		Q4/1996	35430	8287078	1.29699e+06	1.28799e+06	2.00209e+06	1.31138e+06	722431	3136.85	685684
Q1/1997	35520	77.6469	78.5487	72.8601	74.9302	71.4825	76.9036	76.9107	67.4716		Q1/1997	35520	8402060	1.31999e+06	1.30261e+06	1.99337e+06	1.32095e+06	736455	3167.37	698075
Q2/1997	35611	77.8575	78.6353	73.221	74.8793	71.7579	77.0956	77.111	67.7865		Q2/1997	35611	8551940	1.33312e+06	1.32424e+06	2.02014e+06	1.34406e+06	746607	3151.96	707740
Q3/1997	35703	78.1354	78.9977	73.676	74.9784	72.2666	77.3731	77.3965	68.2549		Q3/1997	35703	8691756	1.34584e+06	1.34211e+06	2.03063e+06	1.36175e+06	758247	3173.88	719837
Q4/1997	35795	78.3952	78.6631	74.106	75.1452	72.9256	77.6318	77.6655	68.8122		Q4/1997	35795	8788320	1.35404e+06	1.36441e+06	2.04961e+06	1.39675e+06	768074	3186.65	736196
Q1/1998	35885	78.5229	78.4844	74.4077	75.2692	73.6725	77.7407	77.8083	69.3342		Q1/1998	35885	8889732	1.36122e+06	1.38215e+06	2.06945e+06	1.40189e+06	779936	3153.92	749152
Q2/1998	35976	78.6873	78.2292	74.6464	75.492	74.2138	77.9156	77.9669	69.7312		Q2/1998	35976	8994738	1.3691e+06	1.39857e+06	2.0689e+06	1.41765e+06	782031	3148.56	759137
Q3/1998	36068	78.9819	78.0829	74.9052	75.8883	74.6215	78.2072	78.235	69.9947		Q3/1998	36068	9146521	1.37673e+06	1.41396e+06	2.08527e+06	1.42734e+06	792239	3164.32	771142
Q4/1998	36160	79.2281	78.0417	75.0173	76.2973	74.7809	78.507	78.4253	70.0195		Q4/1998	36160	9325650	1.38939e+06	1.42654e+06	2.09603e+06	1.42374e+06	806020	3199.4	779521
Q1/1999	36250	79.6242	77.9287	75.1722	76.9068	74.7861	78.9793	78.7501	69.9695		Q1/1999	36250	9447103	1.39521e+06	1.43788e+06	2.12971e+06	1.43225e+06	825566	3168.44	785274
Q2/1999	36341	79.8916	77.9295	75.3605	77.2116	74.8133	79.2372	79.0395	69.9712		Q2/1999	36341	9557005	1.39609e+06	1.45346e+06	2.14278e+06	1.4389e+06	835217	3195.57	797134
Q3/1999	36433	80.1805	78.305	75.7372	77.3475	74.9621	79.3951	79.4524	70.1911		Q3/1999	36433	9712280	1.42786e+06	1.47764e+06	2.16902e+06	1.4538e+06	849918	3227.58	809192
Q4/1999	36525	80.5476	79.2335	76.3567	77.3638	75.2962	79.4748	80.0433	70.6637		Q4/1999	36525	9926101	1.46465e+06	1.50854e+06	2.19659e+06	1.48098e+06	862864	3251.32	824226
Q1/2000	36616	81.1635	80.8284	77.4071	77.421	75.9379	79.6964	80.9998	71.5429		Q1/2000	36616	10031031	1.50674e+06	1.54533e+06	2.21886e+06	1.51096e+06	879079	3354.28	847788
Q2/2000	36707	81.6229	82.0929	78.2563	77.5008	76.3772	79.9511	81.6798	72.1772		Q2/2000	36707	10278340	1.53967e+06	1.57659e+06	2.24366e+06	1.53054e+06	892394	3389.51	865800
Q3/2000	36799	82.1523	83.0648	79.1383	77.8323	76.7987	80.3971	82.3018	72.7876		Q3/2000	36799	10357445	1.56227e+06	1.60505e+06	2250062	1.54729e+06	906438	3418.11	882599
Q4/2000	36891	82.5937	83.6558	79.8886	78.2531	77.0403	80.9083	82.7011	73.2055		Q4/2000	36891	10472285	1.576e+06	1.63402e+06	2.26396e+06	1.57608e+06	913825	3466.84	897463
Q1/2001	36981	83.1127	83.7543	80.6786	78.95	77.2951	81.6558	83.0332	73.5858		Q1/2001	36981	10508121	1.59869e+06	1.65847e+06	2.32145e+06	1.58707e+06	927067	3501.35	911129
Q2/2001	37072	83.6993	84.2643	81.6266	79.7422	77.7258	82.2372	83.5931	74.284		Q2/2001	37072	10638384	1.62109e+06	1.68117e+06	2.34675e+06	1.59157e+06	936078	3508.03	927084
Q3/2001	37164	83.9735	84.4943	82.3724	80.2926	78.0013	82.2869	83.9729	74.9712		Q3/2001	37164	10639486	1.63762e+06	1.70199e+06	2.35611e+06	1.59044e+06	935934	3484.9	944974
Q4/2001	37256	84.2278	84.9745	83.2054	80.8658	78.3833	82.1502	84.4833	75.9095		Q4/2001	37256	10701317	1.65427e+06	1.71924e+06	2.37573e+06	1.59901e+06	940107	3496.74	963582
Q1/2002	37346	84.4976	85.7685	84.1848	81.4912	78.9315	81.9188	85.1602	77.1326		Q1/2002	37346	10834445	1.67765e+06	1.74462e+06	2.38671e+06	1.60888e+06	951426	3528.92	984681
Q2/2002	37437	84.8119	86.5114	84.7373	82.1029	79.4255	82.0894	85.7392	78.0611		Q2/2002	37437	10934752	1.70335e+06	1.76527e+06	2.41085e+06	1.62691e+06	958842	3580.54	1.00403e+06
Q3/2002	37529	85.1907	87.0578	84.8782	82.7281	79.9285	82.5199	86.1839	78.6928		Q3/2002	37529	11037057	1.7271e+06	1.77454e+06	2.4407e+06	1.64073e+06	972291	3613.4	1.01827e+06
Q4/2002	37621	85.6516	87.4659	84.6375	83.3744	80.4327	83.3352	86.5175	79.042		Q4/2002	37621	11103834	1.75075e+06	1.77016e+06	2.4545e+06	1.65749e+06	987337	3636.97	1.03047e+06
Q1/2003	37711	86.179	87.3927	84.0122	84.0281	80.9451	84.4974	86.734	79.0952		Q1/2003	37711	11230078	1.76079e+06	1.75972e+06	2.44377e+06	1.66306e+06	1.00662e+06	3642.05	1.04134e+06
Q2/2003	37802	86.4555	87.3285	83.3538	84.5009	81.0848	85.0942	86.7808	79.0957		Q2/2003	37802	11370653	1.77615e+06	1.74216e+06	2.45805e+06	1.66068e+06	1.01223e+06	3673.16	1.04842e+06
Q3/2003	37894	86.9345	88.081	83.1195	85.236	81.2909	85.7787	87.154	79.4525		Q3/2003	37894	11625137	1.80978e+06	1.74846e+06	2.49181e+06	1.66681e+06	1.02422e+06	3703.87	1.06038e+06
Q4/2003	37986	87.3467	88.8712	83.0228	85.9781	81.2172	86.1344	87.5791	79.9124		Q4/2003	37986	11816827	1.84076e+06	1.76053e+06	2.52274e+06	1.67863e+06	1.03551e+06	3763.28	1.07747e+06
Q1/2004	38077	88.1083	90.4136	83.4713	87.1363	81.3339	86.6221	88.47	80.8639		Q1/2004	38077	11988403	1.88296e+06	1.78571e+06	2.5561e+06	1.68881e+06	1.04889e+06	3831.11	1.09692e+06
Q2/2004	38168	88.8752	91.6142	84.0192	87.9963	81.4861	87.3249	89.2845	81.6896		Q2/2004	38168	12181398	1.91527e+06	1.80882e+06	2.59022e+06	1.69747e+06	1.0699e+06	3865.05	1.11672e+06
Q3/2004	38260	89.422	91.6229	84.4952	88.3198	81.431	87.9894	89.7749	82.1813		Q3/2004	38260	12367744	1.91861e+06	1.82614e+06	2.595e+06	1.69795e+06	1.09086e+06	3906.58	1.13476e+06
Q4/2004	38352	90.0493	91.1486	85.1846	88.3996	81.4982	88.93	90.2482	82.6124		Q4/2004	38352	12562163	1.91349e+06	1.85361e+06	2.59986e+06	1.70213e+06	1.11043e+06	3916.76	1.14773e+06
Q1/2005	38442	90.8839	90.3378	86.2317	88.3503	81.637	90.2951	90.8492	83.088		Q1/2005	38442	12813729	1.91445e+06	1.88137e+06	2.59339e+06	1.70077e+06	1.13132e+06	3961.82	1.16601e+06
Q2/2005	38533	91.5432	90.3721	87.1296	88.3988	82.0263	91.3652	91.3439	83.8902		Q2/2005	38533	12974083	1.93642e+06	1.90471e+06	2.61211e+06	1.72548e+06	1.15288e+06	4014.56	1.18927e+06
Q3/2005	38625	92.3995	90.9875	88.261	88.9043	82.9463	92.5143	92.1155	85.362		Q3/2005	38625	13205445	1.97241e+06	1.93889e+06	2.64838e+06	1.75648e+06	1.18175e+06	4087.04	1.22161e+06
Q4/2005	38717	93.1001	92.1365	89.299	89.5327	84.2031	93.3575	92.8065	87.2284		Q4/2005	38717	13381629	2.02724e+06	1.9755e+06	2.67727e+06	1.7881e+06	1.20433e+06	4126.42	1.26137e+06
Q1/2006	38807	93.8324	93.7694	90.4259	90.4797	85.7284	94.0058	93.6174	89.7048		Q1/2006	38807	13648904	2.06867e+06	2.01714e+06	2.7308e+06	1.82699e+06	1.22241e+06	4165.62	1.31123e+06
Q2/2006	38898	94.587	95.1033	91.4573	91.3908	87.1891	94.737	94.4305	91.7941		Q2/2006	38898	13799794	2.10277e+06	2.06016e+06	2.80244e+06	1.86907e+06	1.23251e+06	4216.42	1.35578e+06
Q3/2006	38990	95.2469	95.8254	92.3002	92.1446	88.269	95.369	95.1203	93.3141		Q3/2006	38990	13908498	2.12009e+06	2.07957e+06	2.85377e+06	1.89893e+06	1.24419e+06	4239.91	1.39184e+06
Q4/2006	39082	95.5799	95.467	92.7241	92.517	88.8341	95.6736	95.4465	94.0118		Q4/2006	39082	14066370	2.11961e+06	2.10464e+06	2.9027e+06	1.93597e+06	1.25287e+06	4306.45	1.41557e+06
Q1/2007	39172	96.654	95.2387	93.7898	93.5386	89.7943	96.7453	96.5106	94.9377		Q1/2007	39172	14233226	2.13559e+06	2.1454e+06	2.94678e+06	1.96005e+06	1.27509e+06	4386.48	1.44413e+06
Q2/2007	39263	97.1946	95.2795	94.4018	94.0957	90.5426	97.3074	97.0347	95.452		Q2/2007	39263	14422313	2.15192e+06	2.17661e+06	2.98631e+06	1.9744e+06	1.29488e+06	4415.5	1.46373e+06
Q3/2007	39355	97.5317	95.713	94.9043	94.5117	91.4088	97.6547	97.3719	95.8988		Q3/2007	39355	14569675	2.18002e+06	2.19501e+06	3.02488e+06	1.99256e+06	1.3049e+06	4410.84	1.48251e+06
Q4/2007	39447	97.9563	96.4856	95.5813	95.0675	92.6685	98.1745	97.8094	96.5546		Q4/2007	39447	14685330	2.2159e+06	2.21662e+06	3.05107e+06	2.01703e+06	1.31368e+06	4453.06	1.50549e+06
Q1/2008	39538	98.5161	98.1084	96.5077	95.8123	94.2912	98.8789	98.3927	97.5022		Q1/2008	39538	14668445	2.26119e+06	2.24754e+06	3.10197e+06	2.07513e+06	1.32389e+06	4493.17	1527202
Q2/2008	39629	98.9954	99.271	97.3406	96.6135	95.836	99.4659	98.8976	98.3503		Q2/2008	39629	14812974	2.27105e+06	2.25672e+06	3.11937e+06	2.08838e+06	1.33637e+06	4493.4	1.54134e+06
Q3/2008	39721	99.6737	100.4	98.3967	97.751	97.5129	100.114	99.6217	99.3747		Q3/2008	39721	14842983	2.25905e+06	2.27326e+06	3.14468e+06	2.09521e+06	1.35631e+06	4468.4	1.54563e+06
Q4/2008	39813	99.815	100.603	98.9178	98.5037	98.6021	100.034	99.7577	99.8311		Q4/2008	39813	14549949	2.21446e+06	2.25369e+06	3.10763e+06	2.07057e+06	1.33954e+06	4373.01	1.53709e+06
Q1/2009	39903	100.062	100.111	99.5963	99.4975	99.7338	100.086	100.032	100.375		Q1/2009	39903	14383885	2.167e+06	2.23176e+06	2.99818e+06	2.03669e+06	1.30962e+06	4170.66	1.52075e+06
Q2/2009	39994	99.895	99.5678	99.7765	99.8561	100.055	99.877	99.8924	100.164		Q2/2009	39994	14340417	2.15115e+06	2.23275e+06	3.01119e+06	2.02701e+06	1.29246e+06	4252.7	1.50286e+06
Q3/2009	40086	99.8732	99.8838	100.049	100.132	100.113	99.8479	99.886	99.8598		Q3/2009	40086	14384145	2.16105e+06	2.24245e+06	3.03752e+06	2.03976e+06	1.29793e+06	4253.57	1.49363e+06
Q4/2009	40178	100.17	100.438	100.578	100.515	100.098	100.189	100.19	99.601		Q4/2009	40178	14566511	2.18055e+06	2.26967e+06	3.07707e+06	2.04748e+06	1.31775e+06	4327.34	1.48883e+06
Q1/2010	40268	100.522	101.556	101.122	100.737	99.7523	100.57	100.521	99.1288		Q1/2010	40268	14681063	2.21478e+06	2.29142e+06	3.10653e+06	2.04899e+06	1.33853e+06	4380.21	1.48624e+06
Q2/2010	40359	100.968	102.545	101.765	101.201	99.8026	100.99	100.966	98.9638		Q2/2010	40359	14888600	2.25556e+06	2.31834e+06	3.18475e+06	2.06128e+06	1.35102e+06	4454.15	1.48647e+06
Q3/2010	40451	101.43	103.169	102.446	101.818	100.189	101.409	101.439	99.0142		Q3/2010	40451	15057660	2.2824e+06	2.34819e+06	3.23019e+06	2.0802e+06	1.36632e+06	4556.36	1.48794e+06
Q4/2010	40543	101.95	103.751	103.226	102.655	100.953	101.921	101.972	99.3302		Q4/2010	40543	15230208	2.29827e+06	2.38214e+06	3.28396e+06	2.1095e+06	1.38874e+06	4546.43	1.49267e+06
Q1/2011	40633	102.4	103.677	103.965	103.589	101.98	102.37	102.437	99.7902		Q1/2011	40633	15238371	2.31385e+06	2.4243e+06	3.37238e+06	2.13757e+06	1.40517e+06	4498.47	1.49418e+06
Q2/2011	40724	103.145	103.98	104.744	104.635	103.21	102.967	103.224	100.587		Q2/2011	40724	15460926	2.32402e+06	2.44402e+06	3.41239e+06	2.16474e+06	1.41605e+06	4509.08	1.4989e+06
Q3/2011	40816	103.768	104.191	105.121	105.347	104.205	103.278	103.874	101.324		Q3/2011	40816	15587125	2.33503e+06	2.45801e+06	3.45189e+06	2.17281e+06	1.44004e+06	4647.86	1.50373e+06
Q4/2011	40908	103.918	104.421	104.737	105.357	104.592	103.062	104.033	101.615		Q4/2011	40908	15785312	2.34405e+06	2.45528e+06	3.4529e+06	2.16125e+06	1.44838e+06	4648.12	1.4991e+06
Q1/2012	40999	104.466	105.158	104.516	105.583	105.283	103.066	104.598	102.377		Q1/2012	40999	15973881	2.3759e+06	2.4517e+06	3.47122e+06	2.15641e+06	1.4489e+06	4728.9	1.49725e+06
Q2/2012	41090	104.944	105.861	104.766	106.015	105.986	103.3	105.242	103.167		Q2/2012	41090	16121851	2.39048e+06	2.45574e+06	3.48878e+06	2.15092e+06	1.45698e+06	4726.36	1.49443e+06
Q3/2012	41182	105.508	106.861	105.672	106.811	106.876	103.963	106.102	104.116		Q3/2012	41182	16227939	2.44181e+06	2.4806e+06	3.52305e+06	2.15921e+06	1.46923e+06	4746.11	1.49705e+06
Q4/2012	41274	105.936	107.537	107.034	107.76	107.705	104.831	106.962	105.071		Q4/2012	41274	16297349	2.45162e+06	2.51118e+06	3.53835e+06	2.16382e+06	1.48329e+06	4794.99	1.49601e+06
Q1/2013	41364	106.349	108.248	109.006	108.99	108.583	106.021	107.961	106.094		Q1/2013	41364	16475440	2.48378e+06	2.55662e+06	3.57084e+06	2.15908e+06	1.5156e+06	4897.81	1.5054e+06
Q2/2013	41455	106.571	108.972	110.25	109.865	109.033	106.79	108.382	106.762		Q2/2013	41455	16541390	2.51411e+06	2.60343e+06	3.63142e+06	2.16822e+06	1.53649e+06	4958.68	1.5136e+06
Q3/2013	41547	107.084	109.752	111.296	110.892	109.568	107.673	108.721	107.569		Q3/2013	41547	16749349	2.55481e+06	2.62794e+06	3.6839e+06	2.18619e+06	1.56188e+06	5012.23	1.52401e+06
Q4/2013	41639	107.636	110.366	111.828	111.804	109.896	108.364	108.717	108.197		Q4/2013	41639	16999888	2.58113e+06	2.6515e+06	3.7294e+06	2.1901e+06	1.58775e+06	5010.43	1.53728e+06
Q1/2014	41729	108.084	110.425	111.642	112.428	109.849	108.808	108.214	108.582		Q1/2014	41729	17031324	2.60416e+06	2.64908e+06	3.7832e+06	2.18994e+06	1.59623e+06	5035.83	1.54885e+06
Q2/2014	41820	108.692	110.638	111.78	113.136	110.039	109.063	108.226	109.024		Q2/2014	41820	17320921	2.63088e+06	2.65894e+06	3.80062e+06	2.19216e+06	1619166	4944.07	1.56117e+06
Q3/2014	41912	109.188	110.908	111.924	113.636	110.122	108.956	108.561	109.229		Q3/2014	41912	17622257	2.65579e+06	2.67426e+06	3.8296e+06	2.19907e+06	1.62935e+06	4957.39	1.57475e+06
Q4/2014	42004	109.345	110.826	111.786	113.668	109.863	108.2	108.936	108.963		Q4/2014	42004	17735933	2.6715e+06	2.67389e+06	3.86476e+06	2.19395e+06	1.62539e+06	5005.57	1.58269e+06
Q1/2015	42094	109.326	110.505	111.604	113.388	109.467	106.975	109.508	108.428		Q1/2015	42094	17874715	2.67559e+06	2.68077e+06	3.85955e+06	2.19102e+06	1.60378e+06	5107.24	1.59149e+06
Q2/2015	42185	109.917	111.252	112.125	113.857	110.075	106.632	110.708	108.684		Q2/2015	42185	18093224	2.70899e+06	2.69269e+06	3.89278e+06	2.21235e+06	1.59632e+06	5159.54	1.60878e+06
Q3/2015	42277	110.287	111.617	112.428	114.169	110.826	106.328	111.69	108.817		Q3/2015	42277	18227689	2.72963e+06	2.71023e+06	3.91603e+06	2.23239e+06	1.60077e+06	5209.8	1625875
Q4/2015	42369	110.513	111.991	112.594	114.374	111.816	106.064	112.525	108.921		Q4/2015	42369	18287226	2.75913e+06	2.72101e+06	3.93967e+06	2.25879e+06	1.59845e+06	5232.51	1.64236e+06
Q1/2016	42460	110.583	112.387	112.632	114.478	113.043	105.905	113.187	109.027		Q1/2016	42460	18325187	2.77787e+06	2.73979e+06	3.96819e+06	2.28883e+06	1605897	5307.95	1.65628e+06
Q2/2016	42551	111.25	113.046	113.353	115.215	114.52	106.422	114.181	109.706		Q2/2016	42551	18538039	2.79853e+06	2.75103e+06	4.01231e+06	2.321e+06	1.6095e+06	5366.23	1.67971e+06
Q3/2016	42643	111.629	113.015	113.734	115.604	115.238	106.838	114.545	110.076		Q3/2016	42643	18729130	2.81098e+06	2.76575e+06	4.03934e+06	2.34092e+06	1.63279e+06	5393.51	1.69741e+06
Q4/2016	42735	112.19	113.34	114.321	116.143	115.68	107.568	114.753	110.607		Q4/2016	42735	18905545	2.83995e+06	2.79693e+06	4.07506e+06	2.36125e+06	1.65307e+06	5416.74	1.71723e+06
Q1/2017	42825	112.746	113.344	114.887	116.662	115.685	108.369	114.639	111.157		Q1/2017	42825	19057705	2.85119e+06	2.83247e+06	4.13008e+06	2.37333e+06	1.68183e+06	5447.84	1.73934e+06
Q2/2017	42916	113.029	113.03	115.173	116.85	115.526	108.805	114.369	111.395		Q2/2017	42916	19250009	2.84934e+06	2.85821e+06	4.16293e+06	2.37939e+06	1.7075e+06	5463.7	1.75814e+06
Q3/2017	43008	113.615	112.943	115.759	117.401	115.827	109.452	114.605	111.967		Q3/2017	43008	19500602	2.85714e+06	2.89236e+06	4.21333e+06	2.39377e+06	1.72471e+06	5502.09	1.77947e+06
Q4/2017	43100	114.275	113.678	116.435	118.093	116.354	110.208	115.107	112.598		Q4/2017	43100	19754102	2.88597e+06	2.92894e+06	4.26391e+06	2.41312e+06	1.74399e+06	5540.31	1.8016e+06
	43190	114.9	114.638	116.955	118.67	116.937	110.734	115.687	113.17		Q1/2018	43190	19960097	2.91717e+06	2.94668e+06	4.29746e+06	2.43205e+06	1.75817e+06	5559.87	1.82335e+06

## Sheet: DataTransformed
	Real GDP Growth (log-first differences, annualized, units)										GDP Deflator Index (log-first differences, annualized, units)										NOTE: This is the transformed data used to estimate the model.
	United States: Gross Domestic Product (SAAR, Bil.2010.US$, PPP)	United Kingdom: Gross Domestic Product (SAAR, Bil.2010.US$, PPP)	France: Gross Domestic Product (SAAR, Bil.2010.US$, PPP)	Germany: Gross Domestic Product (SAAR, Bil.2010.US$, PPP)	Italy: Gross Domestic Product (SAAR, Bil.2010.US$, PPP)	Canada: Gross Domestic Product (SAAR, Bil.2010.US$, PPP)	Japan: Gross Domestic Product (SAAR, Bil.2010US$, PPP)	Spain: Gross Domestic Product (SAAR, Bil.2010.US$, PPP)			United States: Gross Domestic Product Implicit Deflator	United Kingdom: Gross Domestic Product Implicit Deflator	France: Gross Domestic Product Implicit Deflator	Germany: Gross Domestic Product Implicit Deflator	Italy: Gross Domestic Product Implicit Deflator	Canada: Gross Domestic Product Implicit Deflator	Japan: Gross Domestic Product Implicit Deflator	Spain: Gross Domestic Product Implicit Deflator			I report it in units, but multiplied by 4 in order to get the annualized log-first difference in units.
Q1/1960	#N/A	#N/A	#N/A	#N/A	#N/A	#N/A	#N/A	#N/A		Q1/1960	#N/A	#N/A	#N/A	#N/A	#N/A	#N/A	#N/A	#N/A			The code mechanically transforms the series in percentages when it is reported in levels (option 1), so naturally I do not need to express the growth rates in percentages as an input for the code.
Q2/1960	-0.0152087	-0.028779	0.0150003	0.0705602	0.0582775	-0.0776799	0.00735143	0.0814008		Q2/1960	0.0104206	0.0164514	0.0150473	0.00420207	0.0090034	0.00567785	0.00949779	0.0142738			Hence, I note that the volatility estimated is the instantaneous standard deviation of the annualized log-first difference expressed in percentages.
Q3/1960	0.00994789	0.0602199	0.0298309	0.135931	0.0583182	0.0605909	0.135102	0.110358		Q3/1960	0.0144113	0.0116268	0.0157908	-0.00398964	0.0160626	0.0114086	0.0126195	0.0189771
Q4/1960	-0.0487163	0.0243516	0.04713	0.0406752	0.00306898	0.0132116	0.150854	0.0797211		Q4/1960	0.0122954	0.01637	0.0127526	-0.0089732	0.0109898	0.0122184	0.0103268	0.0147579
Q1/1961	0.0271057	0.0646397	0.0638231	0.0402658	0.140804	-0.0162189	0.119746	0.112729		Q1/1961	0.00885368	0.00758006	0.00921716	-0.0211708	0.00998779	0.00253268	0.00588696	0.00805715
Q2/1961	0.0736719	0.0160723	0.0635064	-0.0216318	0.0837371	0.09935	0.0844083	0.173813		Q2/1961	0.00957353	0.00182941	0.00684065	-0.0105427	0.00966539	0.0075437	0.00876654	0.00834882
Q3/1961	0.066146	-0.0209663	0.063187	0.0812693	0.0921559	0.0954718	0.0759845	0.0808758		Q3/1961	0.0105972	0.0248767	0.0106468	5.3635e-05	0.00910925	0.00951387	0.0114666	0.00717967
Q4/1961	0.0802584	-0.00639516	0.06739	0.0181828	0.0758029	0.0556066	0.17944	0.111305		Q4/1961	0.0129473	0.00441689	0.0126946	0.0109888	0.0120445	0.0118088	0.0150681	0.0125507
Q1/1962	0.071404	0.0188274	0.0713707	0.0585042	0.0587636	0.104536	0.0533796	0.0935219		Q1/1962	0.0207278	0.0182536	0.022548	0.0274533	0.0216568	0.0178939	0.0248143	0.0201291
Q2/1962	0.0428687	0.0370075	0.0641107	0.041478	0.0428354	0.0289651	0.0554997	0.0919813		Q2/1962	0.00658443	0.0113149	0.0060334	0.0113569	0.00792637	0.00638873	0.00961844	0.00802312
Q3/1962	0.0379227	0.0242288	0.0571808	0.094679	0.023943	0.052148	0.0485999	0.0967802		Q3/1962	0.00824352	0.00829195	0.00702169	0.0108801	0.00725734	0.0100169	0.00927678	0.00865417
Q4/1962	0.0154921	-0.0144491	0.049761	-0.00865629	0.059617	0.0805021	0.082721	0.0107162		Q4/1962	0.00778087	0.0116493	0.00672177	0.00822644	0.0068957	0.0095015	0.00702533	0.00914427
Q1/1963	0.0442643	0.0205712	-0.0671932	-0.142427	0.0264654	0.0239209	0.0543036	0.223742		Q1/1963	0.0175392	0.0098847	0.0167766	0.0159823	0.018334	0.019883	0.0146909	0.0164913
Q2/1963	0.0518073	0.167975	0.174746	0.175471	0.10818	0.0582198	0.116016	0.00331419		Q2/1963	0.00658127	0.00998661	0.00897559	0.00551157	0.0062041	0.00881147	0.004217	0.00741371
Q3/1963	0.0773312	0.0202966	0.129822	0.136417	0.0651192	0.0306231	0.115601	0.0853915		Q3/1963	0.0049089	0.00673181	0.00481265	0.00432442	0.003682	0.00652403	0.00378431	0.00509722
Q4/1963	0.028446	0.0878555	0.0124322	0.019312	0.0409264	0.123704	0.135494	0.0737808		Q4/1963	0.0323645	0.032084	0.0299012	0.032161	0.0333765	0.0310293	0.0323428	0.0304315
Q1/1964	0.0855915	0.0239948	0.0746041	0.0546611	0.0588562	0.0979341	0.125614	0.0225556		Q1/1964	0.0128094	0.00753753	0.0144518	0.0132094	0.0139996	0.00875714	0.0136278	0.0121324
Q2/1964	0.047286	0.0684643	0.0381741	0.0485749	-0.0406813	0.0137474	0.0953438	0.0653834		Q2/1964	0.00957099	0.0139958	0.00957925	0.00985417	0.0102571	0.010227	0.0102631	0.00860422
Q3/1964	0.0539661	0.0157448	0.0487519	0.0413493	-0.00676189	0.0418388	0.0613259	0.0299394		Q3/1964	0.0162181	0.0188411	0.0174402	0.0164521	0.0158494	0.0170812	0.0175919	0.018337
Q4/1964	0.0141595	0.0604031	0.0359872	0.0540466	-0.0167744	0.0210525	0.0497039	0.0860345		Q4/1964	0.0181401	0.0174406	0.019505	0.0182509	0.0190729	0.0191763	0.0194755	0.0207178
Q1/1965	0.0974558	-0.0111726	0.00886997	0.0649327	0.0536445	0.123719	0.0323687	0.0842334		Q1/1965	0.0200636	0.0225857	0.0208647	0.0201381	0.0203015	0.0208082	0.0212137	0.0170325
Q2/1965	0.0543138	0.00425245	0.0983058	0.06263	0.0789685	0.0373487	0.0496505	0.0170284		Q2/1965	0.0179992	0.013689	0.0160887	0.0181011	0.0159097	0.0210927	0.0191997	0.018271
Q3/1965	0.0804267	0.033103	0.0573872	0.0265467	0.0529306	0.0536748	0.0896251	0.0405155		Q3/1965	0.0157094	0.0170508	0.0157907	0.0158724	0.016261	0.0172801	0.015848	0.0167856
Q4/1965	0.0932388	0.024694	0.0553045	0.0238667	0.0596469	0.0971765	0.0617031	0.117823		Q4/1965	0.0271415	0.0264677	0.0263657	0.027348	0.027631	0.0277051	0.0275574	0.0269148
Q1/1966	0.0975754	0.00658863	0.0359264	0.0719852	0.0384988	0.0757685	0.105636	-0.0273138		Q1/1966	0.0258349	0.0263686	0.0261308	0.026133	0.0266279	0.0266912	0.0241685	0.0247642
Q2/1966	0.0163457	0.0231678	0.0600479	0.0122805	0.0565697	0.0833633	0.153523	0.201538		Q2/1966	0.0326427	0.0322272	0.0332811	0.0327145	0.0326164	0.0323996	0.0314192	0.0345206
Q3/1966	0.0283931	0.0131714	0.0453589	0.00490405	0.111434	-0.00153479	0.0961025	0.0785709		Q3/1966	0.038662	0.0403099	0.0380135	0.0385619	0.0378639	0.0381465	0.0380485	0.035539
Q4/1966	0.0341478	-0.0167665	0.0217784	-0.0629544	0.0191219	0.0479702	0.0791464	0.0108212		Q4/1966	0.0338194	0.0366555	0.0341166	0.0334825	0.0322523	0.0318597	0.0335724	0.0332157
Q1/1967	0.0365551	0.0540966	0.0679649	-0.0199589	0.0790172	-0.00928826	0.104609	0.0110045		Q1/1967	0.0166645	0.0137159	0.0173284	0.0162328	0.018066	0.0173131	0.0160398	0.0185924
Q2/1967	0.00350711	0.05575	0.0435452	-0.0125228	0.0851224	0.0830532	0.106207	0.0477706		Q2/1967	0.0201191	0.0237684	0.0199319	0.0202779	0.0212195	0.0201928	0.0202248	0.0212769
Q3/1967	0.0343826	0.0175577	0.0380659	0.0954361	0.061172	0.0133021	0.136334	0.0680277		Q3/1967	0.0380709	0.0349303	0.0387493	0.0387415	0.0371313	0.0360716	0.0381511	0.0358431
Q4/1967	0.032069	0.0212452	0.0388003	0.0511093	0.0782674	0.0151067	0.0765962	-0.028868		Q4/1967	0.0437676	0.0445937	0.0411401	0.0451556	0.0430909	0.0436955	0.0438689	0.0492561
Q1/1968	0.0804147	0.142845	0.114724	0.0465404	0.00971329	0.0323294	0.0943198	0.0844598		Q1/1968	0.0441384	0.0441763	0.0427456	0.0461211	0.0458922	0.044641	0.0449463	0.0442691
Q2/1968	0.0669839	-0.0173543	-0.315348	0.030971	0.082921	0.10718	0.134185	0.119556		Q2/1968	0.0419828	0.0446464	0.0475488	0.043271	0.0423444	0.0400041	0.0423817	0.0416278
Q3/1968	0.0287072	0.0788135	0.430868	0.0868579	0.0950394	0.0536503	0.0895625	0.0321226		Q3/1968	0.0392798	0.0371104	0.0355445	0.0397182	0.038509	0.0386165	0.0389765	0.0358441
Q4/1968	0.0177639	0.0159857	0.0407751	0.0599262	0.0925587	0.0547587	0.221637	0.158936		Q4/1968	0.0562344	0.0549867	0.0569544	0.0558731	0.0539916	0.0549733	0.0555265	0.0539844
Q1/1969	0.0617177	-0.00891219	0.00734307	0.0994121	0.0621608	0.0514993	0.0350338	0.139461		Q1/1969	0.0412212	0.040587	0.0450461	0.0399928	0.0409713	0.0416499	0.0407732	0.0429785
Q2/1969	0.0128084	0.0291254	0.0969373	0.0509971	0.0715856	0.0191693	0.114789	-0.0135373		Q2/1969	0.0507455	0.0470847	0.0467743	0.0495851	0.0512088	0.0518275	0.0499563	0.0489985
Q3/1969	0.024958	0.0224996	0.0376377	0.0850204	0.00955496	0.0419715	0.0946963	0.0739307		Q3/1969	0.0559109	0.0605363	0.0546338	0.054705	0.058337	0.0563331	0.0557669	0.0608129
Q4/1969	-0.0174992	0.0204142	0.0314858	0.0610022	-0.0816819	0.0559388	0.153148	0.0445304		Q4/1969	0.0511744	0.063901	0.0507514	0.050038	0.0512608	0.0536239	0.0511179	0.0501844
Q1/1970	-0.00709524	-0.0256327	0.0757335	-0.0643412	0.232942	0.0251816	0.120726	0.0740961		Q1/1970	0.0559415	0.0785157	0.0554026	0.0547982	0.0530928	0.0607178	0.0567942	0.0591352
Q2/1970	0.00707177	0.0932243	0.0501657	0.155953	0.0290934	-0.00164765	0.0482316	0.00634952		Q2/1970	0.0553959	0.0661448	0.0571276	0.0545531	0.0602622	0.0578022	0.0570811	0.0540782
Q3/1970	0.035278	0.0394612	0.0547136	0.0740243	0.0794591	0.0406007	0.105798	0.0203912		Q3/1970	0.0327353	0.0437834	0.0368555	0.0323806	0.0321257	0.0360327	0.035803	0.0324563
Q4/1970	-0.0413568	0.0348047	0.0623194	0.0337614	0.00447034	0.0067409	-0.0128938	0.0314373		Q4/1970	0.05237	0.0581093	0.0563388	0.0522304	0.0482795	0.0530046	0.0563517	0.0510319
Q1/1971	0.105695	-0.0236844	0.00516	-0.0775918	-0.0209765	-0.0240371	0.0362873	0.0311154		Q1/1971	0.0606616	0.0596972	0.0713896	0.0612712	0.0566321	0.0632546	0.0667989	0.0617346
Q2/1971	0.0227626	0.0708125	0.0722235	0.0830769	0.0168442	0.115279	0.0639911	0.0772725		Q2/1971	0.0522642	0.0503723	0.0550762	0.0524929	0.0484191	0.0527699	0.0567189	0.0494242
Q3/1971	0.0311513	0.0689969	0.064698	0.0686097	0.0581661	0.10875	0.0484594	0.0729272		Q3/1971	0.0405121	0.0400433	0.0441554	0.040713	0.0403282	0.0394096	0.0424854	0.0397882
Q4/1971	0.0116657	0.0157945	0.0341252	-0.00336869	0.0225179	0.0451701	0.0362615	0.0797422		Q4/1971	0.0330612	0.0388582	0.033604	0.0330984	0.0381421	0.0339934	0.0334432	0.0335796
Q1/1972	0.0711344	0.00419706	0.0520517	0.00404205	0.0439501	-0.0156132	0.128242	0.0643796		Q1/1972	0.0614381	0.0623961	0.0599933	0.0614455	0.0700828	0.0610953	0.0600081	0.0630761
Q2/1972	0.0915723	0.105658	0.0153376	0.0647924	-0.00181275	0.112152	0.0745866	0.0934141		Q2/1972	0.0244615	0.0306381	0.0273564	0.024527	0.0285241	0.0233388	0.0224147	0.0238437
Q3/1972	0.036695	0.0108589	0.0353617	0.0923498	0.0535665	0.00909405	0.0844819	0.0869241		Q3/1972	0.037302	0.0416473	0.0432561	0.0375325	0.0370996	0.0366362	0.034712	0.036546
Q4/1972	0.0658792	0.0620946	0.0658642	0.0616779	0.0189651	0.0945624	0.0993804	0.0784662		Q4/1972	0.0504673	0.0630209	0.0554552	0.0507954	0.0511768	0.0490069	0.0481377	0.048963
Q1/1973	0.0972804	0.193463	0.0789078	0.0549301	0.0358983	0.104097	0.131605	0.0729568		Q1/1973	0.0462288	0.046407	0.055382	0.046781	0.051411	0.0447196	0.0429255	0.0442855
Q2/1973	0.0450952	0.00569991	0.0429835	0.0294465	0.118106	0.0434192	0.0364146	0.0706832		Q2/1973	0.0604474	0.0503514	0.0723145	0.0606835	0.0619849	0.0605982	0.0578089	0.0611978
Q3/1973	-0.0217951	-0.0384502	0.0342071	0.0130871	0.125289	0.0135276	0.0116477	0.0655265		Q3/1973	0.0756578	0.0903524	0.0904612	0.0757532	0.0737542	0.0746228	0.0738182	0.0779739
Q4/1973	0.0371238	-0.0170319	0.0508087	0.00994238	0.0965305	0.0746445	0.0491333	0.0652814		Q4/1973	0.0788177	0.0916909	0.0960398	0.0787723	0.0699821	0.0793703	0.0769902	0.0814443
Q1/1974	-0.0333643	-0.110532	0.0381886	0.0336854	0.032309	0.0290235	-0.139856	0.0673626		Q1/1974	0.075292	0.0821862	0.0926757	0.0751046	0.0806966	0.0757967	0.0736337	0.0788526
Q2/1974	0.010502	0.0573072	0.0199757	-0.00307872	0.0380213	0.0440204	0.0287027	0.050227		Q2/1974	0.0940075	0.106647	0.102766	0.0939141	0.0947432	0.0941371	0.09406	0.0925223
Q3/1974	-0.0389168	0.0258415	0.0375612	1.70056e-07	0.00666295	-0.00470464	0.0508485	0.0281283		Q3/1974	0.11427	0.116464	0.11314	0.114323	0.114445	0.117239	0.116731	0.108831
Q4/1974	-0.016031	-0.0584966	-0.0608681	-0.0508299	-0.0845013	-0.0187283	-0.0217411	0.00264573		Q4/1974	0.116107	0.116926	0.107387	0.116318	0.110586	0.116907	0.120094	0.115422
Q1/1975	-0.0486202	0.00196645	-0.0180368	-0.0231471	-0.0701966	-0.0271565	0.00523994	-0.0201272		Q1/1975	0.0897035	0.0914148	0.0714514	0.0900518	0.0839236	0.0936305	0.0961395	0.0918006
Q2/1975	0.0307001	-0.0659439	0.0100973	-0.0201287	-0.0020649	0.0519757	0.087832	-0.00332405		Q2/1975	0.0594013	0.0650705	0.0465936	0.0595427	0.0555812	0.063034	0.0637113	0.0627432
Q3/1975	0.0655642	-0.0135187	0.0154642	0.0432774	0.0564567	0.0739922	0.0452529	0.0174358		Q3/1975	0.0706141	0.0718187	0.063766	0.0704763	0.0671301	0.0724007	0.0735161	0.0708343
Q4/1975	0.0535666	0.0449199	0.053652	0.0778399	0.0445641	0.0458829	0.0418567	0.0280151		Q4/1975	0.06612	0.0710075	0.0646325	0.0658017	0.0618454	0.0638057	0.0669415	0.063675
Q1/1976	0.0893217	0.0637427	0.0582825	0.0357796	0.0698597	0.0689313	0.033738	0.0395575		Q1/1976	0.0413547	0.0465887	0.0464886	0.0407906	0.0412043	0.0381396	0.039892	0.0402379
Q2/1976	0.0301096	-0.00708854	0.0474084	0.0589836	0.0716524	0.0855342	0.0235653	0.0459051		Q2/1976	0.0403752	0.043282	0.0467848	0.0400945	0.0531916	0.0403857	0.0392799	0.0397945
Q3/1976	0.0202866	0.0494576	0.018872	0.00119458	0.100388	0.0173815	0.055847	0.0386094		Q3/1976	0.0513503	0.0510825	0.0570851	0.0512909	0.0556192	0.0476275	0.0512972	0.0512468
Q4/1976	0.0299112	0.0835127	0.0495258	0.0733859	0.0687918	0.00844336	0.00474849	0.0305984		Q4/1976	0.0702018	0.072151	0.0734585	0.070374	0.0763093	0.0702887	0.0708663	0.0693465
Q1/1977	0.0462721	0.00198819	0.0439753	0.0340127	0.00158406	0.0548928	0.0865589	0.0315646		Q1/1977	0.0638783	0.064473	0.0669263	0.0643081	0.0700523	0.0659106	0.0645744	0.0629822
Q2/1977	0.0777453	-0.0291221	0.0173542	0.0226139	-0.0223368	0.0226629	0.0280427	0.0181042		Q2/1977	0.0557703	0.0590935	0.060766	0.056218	0.0588043	0.0579806	0.0567115	0.0570577
Q3/1977	0.0701465	0.0276213	0.0182958	-0.00115637	-0.03759	0.0192047	0.0271848	0.0132699		Q3/1977	0.0488747	0.0491399	0.0543389	0.0492944	0.047043	0.0517622	0.0497132	0.0514524
Q4/1977	0.000420264	0.0687475	0.0091197	0.0682401	0.0341281	0.06321	0.0538984	0.0266333		Q4/1977	0.0859553	0.0861738	0.0907531	0.0863645	0.0788897	0.0856183	0.0874818	0.0851752
Q1/1978	0.0138937	0.0343631	0.0551831	0.0164508	0.0648433	0.0340723	0.0748508	0.0248925		Q1/1978	0.0591598	0.067336	0.0642469	0.0595694	0.0538345	0.0611291	0.06049	0.0607524
Q2/1978	0.152574	0.0480796	0.0659579	0.0158239	0.0685988	0.0365389	0.0386921	0.00809585		Q2/1978	0.072555	0.0756929	0.077201	0.0726512	0.0680015	0.0746591	0.0733455	0.072948
Q3/1978	0.0389263	0.0537549	-0.0035199	0.0521127	0.0209935	0.0287209	0.0514078	-0.00491139		Q3/1978	0.066334	0.0652348	0.0714345	0.0661431	0.062865	0.0676335	0.0659996	0.0675272
Q4/1978	0.0532926	0.0363021	0.0339004	0.0464929	0.0604935	0.033854	0.0573095	-0.00592405		Q4/1978	0.0832379	0.0841575	0.0853266	0.0826769	0.081942	0.0836513	0.0827931	0.0824803
Q1/1979	0.00793954	-0.015723	0.0342551	0.00494316	0.0627049	0.0342593	0.0593687	-0.0063809		Q1/1979	0.0708804	0.0754392	0.0726693	0.0700485	0.0759212	0.0714146	0.0692948	0.0701989
Q2/1979	0.00483949	0.173511	0.0380581	0.122321	0.0289786	0.0539121	0.0724296	0.00621313		Q2/1979	0.0955725	0.0928113	0.0946625	0.0951483	0.100899	0.0967724	0.0948616	0.0938733
Q3/1979	0.0286192	-0.0884112	0.0454646	2.94336e-07	0.0686243	0.0257992	0.0303872	0.00960852		Q3/1979	0.0845289	0.0965592	0.0835509	0.0846029	0.0923733	0.0843029	0.0838598	0.0850402
Q4/1979	0.0103419	0.0417732	0.00760105	0.0244449	0.0930647	0.0268086	0.0173604	0.0140361		Q4/1979	0.0790023	0.0808091	0.0773597	0.079509	0.0864947	0.0788284	0.0785783	0.0809711
Q1/1980	0.0129179	-0.0390684	0.044498	0.0319217	-0.00735075	0.0281719	0.0152761	0.0266962		Q1/1980	0.0823503	0.0849658	0.0800031	0.0834046	0.0934617	0.0807197	0.082303	0.0863927
Q2/1980	-0.0819591	-0.079981	-0.0229657	-0.0258354	0.0309221	-0.00131768	-0.0211416	0.0135731		Q2/1980	0.0868408	0.0921113	0.0827538	0.0873798	0.0881667	0.0849197	0.086171	0.0848988
Q3/1980	-0.0060658	-0.00496832	-2.76612e-05	-0.0159004	0.00334567	-0.00542113	0.0886089	-0.0158925		Q3/1980	0.0910247	0.0969171	0.0906643	0.0910074	0.0912157	0.0877878	0.0911623	0.0915424
Q4/1980	0.0734522	-0.0427049	-0.00240765	-0.00531392	0.0339477	0.0554269	0.0841203	0.0231336		Q4/1980	0.109006	0.118554	0.107537	0.108412	0.105877	0.104749	0.109314	0.107087
Q1/1981	0.0819355	-0.00633247	0.0137485	0.0473137	-0.0228851	0.0879313	0.0244473	-0.0227118		Q1/1981	0.0986884	0.107499	0.0979726	0.0975802	0.0978594	0.0928813	0.099177	0.0970952
Q2/1981	-0.029317	0.00969947	0.0196355	-0.00999779	0.00779228	0.0438934	0.0486474	-0.00443118		Q2/1981	0.0743427	0.0803497	0.0730946	0.0736365	0.0754947	0.070604	0.0746504	0.0773716
Q3/1981	0.0456385	0.0432763	0.0319503	0.0105235	0.00185197	-0.0360052	-0.00890407	0.017748		Q3/1981	0.07129	0.0763435	0.0713565	0.0708748	0.0713041	0.0691808	0.0716945	0.0708881
Q4/1981	-0.0469393	0.00459598	0.021674	-0.00315449	0.0323348	-0.0182687	0.0290983	-0.00399563		Q4/1981	0.0742383	0.0817424	0.0755553	0.0741816	0.0750303	0.0717493	0.0746691	0.0740622
Q1/1982	-0.0674771	0.00624205	0.0316341	0.0149588	-0.00158123	-0.0478652	0.0608289	0.0164301		Q1/1982	0.0556101	0.0616109	0.058858	0.0559146	0.0560629	0.059061	0.0562446	0.0551469
Q2/1982	0.0217319	0.044712	0.0277046	-0.0246999	-0.0113831	-0.0463779	0.0273698	0.0151629		Q2/1982	0.0478792	0.0497095	0.0484034	0.0481631	0.0475208	0.0493907	0.0486693	0.0479135
Q3/1982	-0.014432	0.010544	0.00217449	-0.0397328	-0.00214009	-0.0354238	0.01745	0.026838		Q3/1982	0.0571784	0.060617	0.0565062	0.0573869	0.0576528	0.0567202	0.0577642	0.0566237
Q4/1982	0.0039	0.028108	0.0238549	0.00957209	-0.0116477	-0.0370867	0.0552024	0.0140751		Q4/1982	0.0442053	0.0503208	0.0424206	0.0443372	0.0468001	0.0447816	0.0447307	0.0453297
Q1/1983	0.052052	0.0717744	0.0161019	0.0360875	0.0111751	0.0652511	0.00251964	0.0145919		Q1/1983	0.0321667	0.0390543	0.0318487	0.0322621	0.0289303	0.0301845	0.0318859	0.0333491
Q2/1983	0.0902526	0.0339666	0.00044893	0.041891	-0.00481925	0.0787124	0.0299572	0.0246284		Q2/1983	0.0269931	0.0286527	0.027272	0.0270528	0.027108	0.0267371	0.026706	0.0275038
Q3/1983	0.0775603	0.0438008	0.0061214	-0.00834341	0.0738041	0.0450698	0.0594179	0.00587808		Q3/1983	0.0416476	0.0439725	0.0419882	0.0417201	0.040349	0.0432627	0.0416649	0.0405206
Q4/1983	0.0816488	0.034448	0.0187543	0.0549518	0.0877034	0.0505671	0.0331838	0.0257616		Q4/1983	0.0293185	0.0314725	0.0291057	0.0293489	0.032665	0.029127	0.0286877	0.0290249
Q1/1984	0.0786941	0.0274793	0.0267036	0.0525561	-0.00785219	0.0680188	0.0458017	0.0329519		Q1/1984	0.0423732	0.0401886	0.0418786	0.0423223	0.0429413	0.0421328	0.0416259	0.04242
Q2/1984	0.0696438	-0.0350362	0.0116611	-0.0635098	0.0128579	0.0774873	0.0601166	-0.0123505		Q2/1984	0.0335193	0.0376767	0.032864	0.0334477	0.0330986	0.0334687	0.0329376	0.0342414
Q3/1984	0.0391596	0.025943	0.0225229	0.107475	0.0468236	0.0169387	0.0485841	0.0346858		Q3/1984	0.0323057	0.0316857	0.031523	0.0322465	0.0314186	0.0324487	0.0321612	0.0314917
Q4/1984	0.0317787	0.078677	0.00970609	0.0335316	0.000641719	0.0625528	0.0068989	0.00510202		Q4/1984	0.0267318	0.0279511	0.0259091	0.0267014	0.0270072	0.0265383	0.0266328	0.028112
Q1/1985	0.0395688	0.0336042	0.00726415	-0.0218625	0.022804	0.0603026	0.0968496	0.0443922		Q1/1985	0.0457373	0.0290098	0.0457997	0.0456441	0.0449116	0.0444753	0.0465475	0.0451593
Q2/1985	0.0364529	0.0843327	0.026868	0.0398903	0.0524894	0.0128279	0.0801838	-0.00375893		Q2/1985	0.024712	0.0306792	0.0259785	0.0245229	0.0253087	0.0266733	0.0251866	0.0247311
Q3/1985	0.0617495	0.00378696	0.0257109	0.05176	0.031913	0.0503228	0.0520124	0.0412532		Q3/1985	0.0231266	0.0244799	0.0238659	0.022932	0.0229623	0.0225265	0.0234819	0.0229162
Q4/1985	0.0298951	0.00970289	0.0159194	0.0239274	0.0265833	0.0610736	0.0527846	0.045677		Q4/1985	0.0230389	0.0378706	0.0227365	0.0227836	0.0236263	0.0228385	0.0231142	0.0204498
Q1/1986	0.0369035	0.0453135	0.0147222	-0.0229477	0.0248498	-0.000885657	0.0158723	0.0112658		Q1/1986	0.0195014	0.0083643	0.0196122	0.0191798	0.0196191	0.0198369	0.0193763	0.0222165
Q2/1986	0.0183208	0.0291681	0.0429341	0.0457646	0.0257892	0.0229629	-0.0098467	0.0941456		Q2/1986	0.0159852	0.0181406	0.0160422	0.0158076	0.0159116	0.0153244	0.015513	0.0149676
Q3/1986	0.0400612	0.0174278	0.0163377	0.0294211	0.039727	0.00509834	0.023365	-0.0283014		Q3/1986	0.0160774	0.0179905	0.0165552	0.0161087	0.0157398	0.0165411	0.0159579	0.0159376
Q4/1986	0.0206569	0.0699735	0.00961212	0.0396868	0.01639	-0.0289202	0.0314241	0.0254709		Q4/1986	0.0222061	0.0202211	0.0219912	0.0223616	0.0225568	0.0226475	0.0222567	0.0233027
Q1/1987	0.0278718	0.0355281	0.0108247	-0.101674	0.0163515	0.0915802	-0.00286359	0.0810996		Q1/1987	0.028976	0.0261005	0.0276308	0.0292703	0.0287103	0.0280301	0.0291129	0.0256935
Q2/1987	0.0446505	0.0573707	0.0455375	0.0888066	0.0601212	0.0515311	0.0829574	0.0593991		Q2/1987	0.0266891	0.0282874	0.0260174	0.0269136	0.0269921	0.026917	0.0268488	0.027868
Q3/1987	0.0361145	0.0955589	0.0304082	0.0275895	0.011529	0.0608121	0.0792157	0.0817667		Q3/1987	0.0289355	0.0240294	0.0290399	0.0291	0.0285805	0.028523	0.028772	0.0307267
Q4/1987	0.065483	0.0450141	0.060657	0.0634895	0.0428099	0.0516032	0.101697	0.0810037		Q4/1987	0.0330073	0.0306562	0.0327301	0.0331371	0.0335485	0.0331573	0.0330781	0.0341379
Q1/1988	0.0224326	0.0717004	0.0515322	-0.0364444	0.0584394	0.0580844	0.094356	0.0128411		Q1/1988	0.0313153	0.0318985	0.0311176	0.0312909	0.031671	0.0319505	0.0311723	0.0298758
Q2/1988	0.0525052	0.0238658	0.026538	0.0718639	0.0253304	0.0353834	-0.00584245	0.0486304		Q2/1988	0.0384587	0.0328577	0.038552	0.03843	0.0379621	0.0377836	0.0385142	0.0392327
Q3/1988	0.023022	0.0607152	0.0525537	0.0450682	0.0522163	0.000327994	0.0882641	0.0714739		Q3/1988	0.0468588	0.0484977	0.0467604	0.0467605	0.0463556	0.0475043	0.0467208	0.0457863
Q4/1988	0.0526361	0.0343151	0.0391444	0.0468267	0.0474731	0.0280083	0.0419235	-0.00898135		Q4/1988	0.0319264	0.0231009	0.0320611	0.0318065	0.0330659	0.0324806	0.0314584	0.0329385
Q1/1989	0.0401474	0.0173753	0.0537307	0.0415888	0.0247713	0.0453636	0.106492	0.0932303		Q1/1989	0.0436862	0.0476826	0.0433869	0.0434672	0.0468368	0.0420178	0.0431791	0.0433535
Q2/1989	0.031331	0.0260053	0.0319939	0.0160696	0.0172586	0.0153364	-0.0525636	0.0391711		Q2/1989	0.041155	0.034304	0.0411224	0.0410381	0.0395083	0.0422207	0.0404659	0.0408869
Q3/1989	0.029749	0.00373687	0.0468686	0.036364	0.0414816	0.0144109	0.0693726	0.0532314		Q3/1989	0.0288955	0.0367028	0.0290072	0.0289525	0.0256464	0.0294726	0.0283107	0.0290961
Q4/1989	0.00845425	0.00360897	0.0472886	0.0460857	0.0409552	-0.00858026	0.122058	-0.00664571		Q4/1989	0.0277206	0.0215997	0.0273203	0.0279102	0.0229749	0.0275092	0.0271947	0.0275323
Q1/1990	0.0435572	0.0271631	0.0275291	0.0821783	0.015913	0.0373701	-0.0190824	0.0348882		Q1/1990	0.043893	0.044819	0.0429371	0.0442331	0.0413575	0.0432973	0.0436981	0.0435517
Q2/1990	0.0154377	0.0205524	0.018915	0.0196182	0.0121728	-0.016665	0.124211	0.0674141		Q2/1990	0.0410834	0.0458998	0.0404631	0.0412182	0.0302847	0.0412832	0.0410765	0.0401409
Q3/1990	0.000987621	-0.0417354	0.0144968	0.0833627	0.00640864	-0.0288142	0.0665188	-0.0119566		Q3/1990	0.0355593	0.0408255	0.0347395	0.0354972	0.0316442	0.0360877	0.0359045	0.0353076
Q4/1990	-0.0342433	-0.0134229	0.0115232	0.0698042	-0.0260681	-0.0360175	-0.00760791	0.148477		Q4/1990	0.0301466	0.0306287	0.0300386	0.0299147	0.028833	0.0302772	0.0302508	0.0308257
Q1/1991	-0.0188149	-0.0112596	-0.00648378	0.114172	0.0781733	-0.0582965	0.0347009	-0.0776184		Q1/1991	0.0397022	0.0405254	0.039703	0.039253	0.0459026	0.0398039	0.0404404	0.0393097
Q2/1991	0.0309228	-0.00487698	0.0226955	-0.0166491	-0.0219498	0.0182523	0.0471724	0.048476		Q2/1991	0.0272789	0.0297214	0.0278346	0.0271433	0.02388	0.0272526	0.0277536	0.02802
Q3/1991	0.0191546	-0.00915863	0.00753666	-0.0202736	0.00143257	0.00510459	-0.00886632	0.0300974		Q3/1991	0.0292607	0.028892	0.0294677	0.0291624	0.0312298	0.0285615	0.0296859	0.0294599
Q4/1991	0.0174245	0.00636317	0.0215373	0.0514961	0.0466725	0.00720237	0.0280026	0.0198512		Q4/1991	0.0215404	0.0253998	0.0214255	0.0216777	0.0228985	0.0208766	0.0214624	0.0234079
Q1/1992	0.0469728	-0.000320014	0.0356819	0.0635748	0.0107434	0.00262877	0.00124257	0.0397103		Q1/1992	0.0171684	0.0104036	0.0174824	0.0173531	0.0193623	0.0176406	0.0172017	0.0183342
Q2/1992	0.0438651	-0.0048728	0.000379015	-0.0262524	-0.00229046	0.00481293	0.0139758	-0.0525013		Q2/1992	0.0254291	0.0247007	0.0248212	0.0255711	0.0217122	0.0257931	0.0253801	0.0239759
Q3/1992	0.0386965	0.025537	-0.000979166	-0.011945	-0.00889212	0.0214695	0.00471012	0.00255385		Q3/1992	0.0189542	0.00758997	0.0193186	0.019027	0.0202689	0.019455	0.0192116	0.0195238
Q4/1992	0.0398813	0.0279738	-0.00869679	-0.0084821	-0.0276677	0.0225705	-0.0255824	-0.0261491		Q4/1992	0.0269701	0.022292	0.0271131	0.0269635	0.0246947	0.0265502	0.0272041	0.0242982
Q1/1993	0.00745035	0.0291853	-0.0276174	-0.035373	-0.00558252	0.0253805	0.0448226	-0.0374946		Q1/1993	0.0226733	0.0180405	0.0243168	0.0225936	0.024396	0.0226604	0.0227916	0.0229292
Q2/1993	0.0237161	0.0202806	0.00561728	0.00201542	-0.00966182	0.036226	-0.0254072	-0.000271003		Q2/1993	0.0242523	0.0278435	0.0243912	0.0242351	0.0244095	0.0249385	0.0248019	0.0245282
Q3/1993	0.0194588	0.0320616	0.0061498	0.0281089	-0.00631333	0.0380174	-0.0288179	0.0478402		Q3/1993	0.0240127	0.0354906	0.0234555	0.0239963	0.0239574	0.0223666	0.0240612	0.0251026
Q4/1993	0.0530451	0.0271273	0.00903786	-0.00250166	0.0292182	0.0171662	0.0251216	0.0150455		Q4/1993	0.0207872	0.0408416	0.0193783	0.0208555	0.0202653	0.0217185	0.0209802	0.0217398
Q1/1994	0.0390266	0.0483862	0.0262041	0.0486252	0.0303513	0.0584295	0.0329385	0.0329476		Q1/1994	0.0193634	0.0573616	0.0182648	0.0194893	0.0206276	0.0194211	0.019696	0.0183982
Q2/1994	0.0542977	0.046162	0.0453729	0.0138203	0.0288413	0.058192	-0.0209143	0.00876049		Q2/1994	0.0198886	0.00567086	0.0190137	0.0198468	0.0195774	0.018853	0.0197605	0.0204387
Q3/1994	0.023519	0.0451703	0.0227169	0.0299443	0.0248614	0.0507763	0.050498	0.0316344		Q3/1994	0.0215683	-0.0349805	0.0220612	0.021392	0.0203003	0.0225137	0.0217207	0.021185
Q4/1994	0.0451631	0.02271	0.0377032	0.0524725	0.0373827	0.0289186	-0.0183483	0.014941		Q4/1994	0.0219538	-0.0721763	0.0240064	0.0216418	0.0208465	0.0218381	0.0216761	0.0206846
Q1/1995	0.013649	0.01285	0.0190806	-0.0182638	0.0499103	0.0367289	0.0399598	0.0425226		Q1/1995	0.0229031	-0.115008	0.0259226	0.02244	0.0209988	0.0230065	0.0228179	0.0238018
Q2/1995	0.0139516	0.0144039	0.0194154	0.034762	0.00280507	0.00136054	0.0492186	0.0274106		Q2/1995	0.0175343	-0.0642918	0.0165805	0.0177676	0.0190922	0.0176611	0.0173749	0.0168688
Q3/1995	0.0340963	0.0391021	0.00498082	0.0134369	0.0177528	0.00522411	0.044298	0.0189864		Q3/1995	0.0189931	-0.0129525	0.0132438	0.0198379	0.0205017	0.0186273	0.0188179	0.0191192
Q4/1995	0.0282963	0.0112534	0.00185103	-0.00191661	0.0329897	0.0161852	0.00955462	0.0280773		Q4/1995	0.019666	0.0352543	0.0102419	0.0211485	0.0234206	0.019629	0.0196255	0.0213149
Q1/1996	0.0261544	0.0359068	0.0267292	-0.040223	0.0172985	0.00248538	0.0373025	0.0257319		Q1/1996	0.0215898	0.0812774	0.0230122	0.0237275	0.0222677	0.0210913	0.021984	0.0237256
Q2/1996	0.0692373	0.012715	0.00970201	0.056725	-0.0208966	0.027747	0.0451073	0.0253692		Q2/1996	0.0151995	0.0649455	0.0233963	0.0123487	0.0148641	0.0151768	0.0152114	0.0175825
Q3/1996	0.0368305	0.027226	0.0240281	0.0242699	0.00901969	0.0349403	-0.00113952	0.03878		Q3/1996	0.0112611	0.0420122	0.00889056	0.00339909	0.00934126	0.011998	0.0112906	0.0139685
Q4/1996	0.0420412	0.0379057	0.00400229	0.0222367	-0.00239916	0.031686	0.0458112	0.0159811		Q4/1996	0.020241	0.0220596	0.0196855	0.00731786	0.016071	0.0210939	0.0204048	0.0217957
Q1/1997	0.0303717	0.0763725	0.0150077	-0.0241328	0.0107552	0.0524328	0.0138336	0.0452868		Q1/1997	0.0247462	-0.00606315	0.0301495	0.00665606	0.0183425	0.0244704	0.0248963	0.0263509
Q2/1997	0.0598922	0.0351999	0.0461095	0.0560901	0.0539846	0.0447915	-0.0299094	0.0363791		Q2/1997	0.0108328	0.00440627	0.0197665	-0.00271681	0.0153803	0.00997434	0.010401	0.0186249
Q3/1997	0.0506114	0.0195765	0.0288452	0.0154161	0.0240455	0.0475071	0.0129352	0.0402478		Q3/1997	0.014256	0.0183912	0.0247813	0.00528957	0.0282574	0.0143699	0.0147861	0.0275447
Q4/1997	0.0309178	0.041273	0.0426408	0.0283408	0.065213	0.0381548	0.00218713	0.0573583		Q4/1997	0.0132765	-0.016977	0.0232764	0.00888981	0.036311	0.0133559	0.0138744	0.0325287
Q1/1998	0.0393823	0.0302732	0.0354127	0.0319345	-0.0260758	0.0556986	-0.0486487	0.0395498		Q1/1998	0.00651105	-0.00909935	0.0162521	0.0065932	0.0407589	0.00560533	0.00735239	0.0302302
Q2/1998	0.0386074	0.0361064	0.0344303	-0.0128808	0.0154288	0.00173952	-0.0149456	0.0301275		Q2/1998	0.00836399	-0.0130258	0.0128077	0.0118211	0.0292807	0.00898665	0.00814195	0.0228363
Q3/1998	0.0519885	0.0297081	0.0299417	0.0105838	0.00533298	0.036934	0.00623902	0.0476765		Q3/1998	0.0149469	-0.0074867	0.0138469	0.0209441	0.0219173	0.0149429	0.0137329	0.0150833
Q4/1998	0.0651282	0.0387302	0.0294489	-0.000919418	-0.0186249	0.053674	0.0343839	0.0418074		Q4/1998	0.0124521	-0.00211347	0.00598213	0.0215032	0.00853257	0.0153056	0.00971652	0.001422
Q1/1999	0.0318132	0.0225362	0.0234096	0.0319349	0.0235718	0.0718495	-0.0554281	0.0322747		Q1/1999	0.0199447	-0.00579756	0.00825056	0.0318232	0.00028049	0.0239928	0.0165324	-0.00286235
Q2/1999	0.0328533	0.00247993	0.0331092	0.00865446	0.0170776	0.0334524	0.0194316	0.0598585		Q2/1999	0.0134117	4.41605e-05	0.0100039	0.0158222	0.00145225	0.0130373	0.0146729	9.84938e-05
Q3/1999	0.0500265	0.070759	0.0460499	0.0416438	0.0332535	0.0618288	0.0190264	0.0475008		Q3/1999	0.0144402	0.0192282	0.0199478	0.00703491	0.00794966	0.00796595	0.0208423	0.0125534
Q4/1999	0.0688373	0.0546166	0.0501845	0.0496732	0.0562878	0.0564563	-0.000321068	0.0467909		Q4/1999	0.0182695	0.0471511	0.0325862	0.000844381	0.0177887	0.00401242	0.0296348	0.0268434
Q1/2000	0.0115899	0.0336157	0.0417488	0.0374069	0.0462384	0.0633359	0.0771856	0.0632807		Q1/2000	0.0304727	0.0797176	0.054647	0.00295353	0.0339421	0.0111357	0.0475187	0.0494607
Q2/2000	0.0748464	0.0243792	0.0364642	0.0403336	0.0284104	0.0473684	0.00835163	0.0487908		Q2/2000	0.0225751	0.0620924	0.0436472	0.00412144	0.0230754	0.0127648	0.0334413	0.0353058
Q3/2000	0.00480822	0.0112111	0.0267254	-0.00567474	0.0215343	0.0402035	0.00326536	0.0431831		Q3/2000	0.025859	0.0470782	0.0448312	0.0170725	0.0220131	0.0222545	0.0303442	0.0336834
Q4/2000	0.0226715	0.00664944	0.0337988	0.00305693	0.061179	0.00711373	0.0372623	0.0439006		Q4/2000	0.0214351	0.0283555	0.0377431	0.021571	0.0125608	0.0253504	0.0193607	0.0229028
Q1/2001	-0.0113905	0.0524736	0.0200534	0.0648342	0.0145915	0.0207622	0.0235942	0.0397275		Q1/2001	0.0250551	0.00470604	0.0393587	0.0354662	0.0132109	0.036785	0.0160261	0.0207256
Q2/2001	0.0211472	0.0313521	0.0076663	0.00343406	-0.0109111	0.0103111	-0.0192598	0.0316678		Q2/2001	0.0281337	0.0242864	0.0467272	0.0399368	0.0222235	0.0283831	0.0268838	0.0377709
Q3/2001	-0.0126703	0.0296919	0.0128447	-0.0116023	-0.0169926	-0.00302956	-0.0445954	0.0396102		Q3/2001	0.0130846	0.0109019	0.0363819	0.0275139	0.0141564	0.00241444	0.0181343	0.0368388
Q4/2001	0.0110859	0.0177825	7.71973e-05	0.00473088	0.0019699	0.0244474	-0.0106707	0.0282574		Q4/2001	0.0120927	0.0226705	0.0402482	0.0284505	0.0195404	-0.00665186	0.0242378	0.0497464
Q1/2002	0.0366631	0.0189528	0.0118113	-0.012377	-0.00328134	0.059152	0.00472381	0.0226998		Q1/2002	0.0127912	0.0371984	0.0468062	0.0308175	0.0278777	-0.011282	0.0319193	0.0639379
Q2/2002	0.0220084	0.0262938	0.020899	0.0103349	0.0196226	0.0227358	0.0309812	0.029958		Q2/2002	0.0148538	0.0345013	0.0261669	0.0299138	0.024955	0.00832377	0.0271058	0.0478619
Q3/2002	0.0194258	0.0302048	0.0143018	0.0188777	0.0085874	0.0347964	0.0158489	0.024122		Q3/2002	0.0178241	0.0251825	0.00664759	0.0303437	0.0252535	0.0209196	0.0206933	0.0322436
Q4/2002	0.00254547	0.0357112	0.0014833	-0.00856987	0.0154935	0.0220951	0.0105531	0.0299323		Q4/2002	0.0215826	0.0187078	-0.0113585	0.0311287	0.0251517	0.0393281	0.015454	0.0177066
Q1/2003	0.0206663	0.0262075	0.00600387	-0.0487671	-0.0119725	0.0219765	-0.00441177	0.0392775		Q1/2003	0.0245548	-0.00335097	-0.0296653	0.0312383	0.0254011	0.0553963	0.00999494	0.00269437
Q2/2003	0.036946	0.0376871	-0.00865723	0.000868499	-0.0126283	-0.00593922	0.0318639	0.0270737		Q2/2003	0.0128141	-0.00293897	-0.0314671	0.0224432	0.00689839	0.0281529	0.00215853	2.29781e-05
Q3/2003	0.0664364	0.040697	0.0257135	0.0199196	0.00458599	0.0150498	0.0161395	0.0273581		Q3/2003	0.0220996	0.034322	-0.0112618	0.0346464	0.0101538	0.0320483	0.017164	0.018007
Q4/2003	0.0464975	0.0321861	0.0321577	0.01466	0.0318935	0.0273343	0.0441888	0.0408625		Q4/2003	0.0189217	0.0357231	-0.00465473	0.0346752	-0.00362732	0.016551	0.019462	0.0230864
Q1/2004	0.022937	0.0218314	0.0352581	-0.000968799	0.0184414	0.028736	0.0309674	0.0242268		Q1/2004	0.034724	0.068828	0.0215491	0.0535241	0.00574306	0.0225868	0.0404873	0.0473464
Q2/2004	0.0292137	0.0152964	0.0252718	0.0137515	0.0129864	0.0470205	-0.00137835	0.0309162		Q2/2004	0.0346674	0.0527649	0.0261676	0.0392842	0.00747944	0.0323228	0.0366585	0.0406338
Q3/2004	0.0361933	0.00659008	0.0155214	-0.00729989	0.00381474	0.0472737	0.0208435	0.0400914		Q3/2004	0.0245337	0.000381875	0.0226005	0.0146795	-0.00270329	0.0303205	0.0219073	0.0240038
Q4/2004	0.0344257	0.0100715	0.0272241	0.0038665	0.00653562	0.0286137	-0.0106222	0.0245386		Q4/2004	0.0279645	-0.0207633	0.0325012	0.00361202	0.00329853	0.0425322	0.0210321	0.0209281
Q1/2005	0.0424125	0.0377393	0.0105829	-0.00773608	-0.00998014	0.0136176	0.0192048	0.0402599		Q1/2005	0.0368987	-0.0357406	0.0488684	-0.00222876	0.0068037	0.0609381	0.0265502	0.0229647
Q2/2005	0.0208304	0.0441194	0.00788845	0.0265836	0.0386663	0.0283759	0.031172	0.0405644		Q2/2005	0.0289159	0.00152138	0.0414361	0.00219245	0.0190298	0.0471254	0.0217249	0.0384342
Q3/2005	0.0334628	0.046526	0.0195404	0.0323475	0.0265959	0.0489263	0.0379296	0.0377503		Q3/2005	0.0372392	0.0271424	0.0516091	0.0228086	0.0446136	0.0499935	0.0336434	0.0695656
Q4/2005	0.022796	0.0594832	0.0280513	0.015232	0.0112261	0.0394212	0.00846215	0.0416114		Q4/2005	0.0302182	0.0501978	0.0467672	0.0281726	0.0601551	0.0362917	0.0298947	0.0865163
Q1/2006	0.0477692	0.0106384	0.0332863	0.0370933	0.0142512	0.0319329	0.00302103	0.0430843		Q1/2006	0.0313366	0.0702693	0.0501592	0.0420897	0.0718097	0.0276829	0.0347987	0.111977
Q2/2006	0.0119348	0.0089031	0.0390353	0.0635096	0.0234963	0.00192986	0.013894	0.0415568		Q2/2006	0.0320429	0.0565021	0.045367	0.0400773	0.067582	0.0309902	0.0345912	0.0920967
Q3/2006	0.00357592	0.00256487	0.000810357	0.0397483	0.0141733	0.0111006	-0.0068922	0.0392969		Q3/2006	0.0278095	0.0302554	0.0366968	0.0328543	0.0492359	0.0265968	0.0291147	0.0656945
Q4/2006	0.0311867	0.014082	0.0296181	0.0518541	0.0517393	0.0150604	0.0485935	0.0378075		Q4/2006	0.0139606	-0.0149889	0.0183277	0.0161362	0.0255283	0.0127548	0.0136939	0.0297954
Q1/2007	0.00247039	0.0396019	0.0310124	0.016366	0.00643149	0.0257806	0.0293066	0.0407136		Q1/2007	0.0446986	-0.00957468	0.0457137	0.0439237	0.0430048	0.0445579	0.0443461	0.0392028
Q2/2007	0.0304803	0.0287603	0.0317502	0.0295528	-0.00401467	0.0384204	0.00471019	0.0323099		Q2/2007	0.0223094	0.00170989	0.0260167	0.0237538	0.033193	0.0231736	0.0216658	0.0216082
Q3/2007	0.0268134	0.0337346	0.0124337	0.0336783	-0.00146529	0.0165862	-0.0180975	0.0323098		Q3/2007	0.0138497	0.0181595	0.0212344	0.0176447	0.0380864	0.0142491	0.0138738	0.0186798
Q4/2007	0.014251	0.0331448	0.01076	0.0110325	-0.00591875	0.0055986	0.0201728	0.0342755		Q4/2007	0.0173759	0.0321597	0.0284329	0.023456	0.0547489	0.0212356	0.0179326	0.0272607
Q1/2008	-0.0273977	0.0142151	0.0168165	0.0349646	0.0441566	0.00237063	0.0120827	0.0182063		Q1/2008	0.0227959	0.0667135	0.0385794	0.0312153	0.0694363	0.0285962	0.0237851	0.039067
Q2/2008	0.0198058	-0.0297162	-0.0180548	-0.0109363	-0.0395395	0.0138546	-0.0202684	0.00222743		Q2/2008	0.0194135	0.0471256	0.0343754	0.0333087	0.0650028	0.0236762	0.0204731	0.0346413
Q3/2008	-0.0192167	-0.0664234	-0.0139611	-0.0144977	-0.0563239	0.0332283	-0.0514949	-0.0303397		Q3/2008	0.0273119	0.0452256	0.0431654	0.0468203	0.0693848	0.0259953	0.0291779	0.0414468
Q4/2008	-0.0854253	-0.0878175	-0.0557223	-0.078088	-0.0917566	-0.0465321	-0.0917743	-0.0404918		Q4/2008	0.0056663	0.00807609	0.0211273	0.0306808	0.0444293	-0.00322015	0.0054589	0.01833
Q1/2009	-0.0558083	-0.0670611	-0.0664474	-0.183568	-0.111642	-0.0924548	-0.200484	-0.0644866		Q1/2009	0.00989232	-0.019604	0.0273431	0.0401531	0.0456487	0.00210474	0.0109749	0.021733
Q2/2009	-0.00541843	-0.00758964	-0.00545344	0.00293253	-0.0319045	-0.0443818	0.0834963	-0.0389214		Q2/2009	-0.00668785	-0.0217583	0.00722892	0.0143934	0.0128482	-0.00837908	-0.0055772	-0.00840605
Q3/2009	0.0130521	0.00568659	0.00641829	0.0237985	0.0227396	0.0180596	0.00107672	-0.0124639		Q3/2009	-0.000873487	0.0126737	0.0109233	0.0110245	0.002342	-0.00116758	-0.000258501	-0.0121777
Q4/2009	0.038536	0.0138232	0.0271812	0.0364655	0.0157107	0.0469746	0.056628	-0.00251231		Q4/2009	0.0118583	0.0221159	0.0210776	0.0152696	-0.000596919	0.0136277	0.0121497	-0.0103789
Q1/2010	0.0172765	0.017999	0.0165772	0.0292807	0.0168	0.0473724	0.0353649	0.0120566		Q1/2010	0.0140567	0.0442875	0.021566	0.00883402	-0.0138526	0.0152136	0.0132096	-0.0190089
Q2/2010	0.0384559	0.034206	0.0213586	0.0810729	0.021906	0.0205149	0.0492978	0.00727282		Q2/2010	0.0176937	0.0387884	0.0253718	0.0183961	0.0020199	0.0166366	0.0176605	-0.00666349
Q3/2010	0.0269064	0.0230624	0.0244787	0.0323725	0.0210667	0.0284629	0.0720649	0.00193818		Q3/2010	0.0182576	0.0242434	0.0266811	0.0243069	0.0154675	0.0165955	0.0186863	0.00203548
Q4/2010	0.0251255	0.0052072	0.0271111	0.0332972	0.025601	0.0449656	-0.0296914	-5.91664e-05		Q4/2010	0.0204505	0.0225074	0.0303184	0.0327322	0.030365	0.0201371	0.0209644	0.0127465
Q1/2011	-0.0154795	0.0298717	0.0416175	0.0700398	0.0123541	0.0294654	-0.0606372	-0.0144481		Q1/2011	0.0176228	-0.00284568	0.0285502	0.0362329	0.040514	0.0175706	0.0182173	0.0184798
Q2/2011	0.0289929	0.00590251	0.00255307	0.00697616	0.00256011	0.00759086	-0.0211693	-0.0192115		Q2/2011	0.0290043	0.0116515	0.029855	0.0402025	0.047951	0.0232605	0.0305925	0.0318274
Q3/2011	0.00842183	0.0107521	0.00844541	0.0189292	-0.0234502	0.0551342	0.0961321	-0.0162925		Q3/2011	0.0240954	0.00814274	0.014389	0.0271148	0.0383505	0.0120679	0.0251229	0.0291749
Q4/2011	0.04478	0.00663349	0.0102199	0.000770437	-0.036208	0.0314813	-0.00588686	-0.0237954		Q4/2011	0.00575856	0.00879018	-0.014667	0.000391087	0.0148533	-0.00837541	0.00611062	0.011468
Q1/2012	0.0264504	0.0258259	0.00260756	0.012599	-0.0352625	0.00127557	0.0472562	-0.0348661		Q1/2012	0.0210498	0.0281644	-0.00844506	0.00856845	0.0263093	0.000160538	0.0216629	0.0299146
Q2/2012	0.018629	-0.00215399	-0.00297048	0.00383904	-0.0368403	0.013182	-0.0267164	-0.0382405		Q2/2012	0.0182535	0.0266287	0.00955611	0.0163461	0.0266412	0.0090624	0.0245673	0.0307138
Q3/2012	0.00478452	0.0473517	0.00584063	0.00919878	-0.0180605	0.00788074	-0.0158809	-0.0296642		Q3/2012	0.0214508	0.0376161	0.0344482	0.0299055	0.0334538	0.0255981	0.0325608	0.0366545
Q4/2012	0.0008976	-0.00916348	-0.00221284	-0.0180342	-0.0223682	0.00487545	0.00870218	-0.0392731		Q4/2012	0.0161747	0.0252023	0.0512209	0.0353663	0.0308913	0.0332354	0.032283	0.0365033
Q1/2013	0.0278856	0.0257828	-0.00129203	-0.00885525	-0.0412563	0.0410091	0.047692	-0.0137463		Q1/2013	0.0155877	0.0263606	0.0730297	0.0454188	0.0324741	0.0451797	0.0371742	0.0387705
Q2/2013	0.00765642	0.0218743	0.0271728	0.0353035	0.000351467	0.0258476	0.033832	-0.00335383		Q2/2013	0.00832333	0.0266665	0.0453996	0.0319849	0.0165585	0.0289104	0.0155737	0.0250918
Q3/2013	0.0307488	0.0356991	-0.000300239	0.0201972	0.0134272	0.032642	0.0304632	-0.00272903		Q3/2013	0.0192259	0.0285435	0.0377797	0.0371934	0.0195802	0.0329198	0.0125022	0.0301452
Q4/2013	0.0388334	0.0186718	0.0166368	0.0163121	-0.0048031	0.0401152	-0.00126039	0.0113899		Q4/2013	0.020556	0.0223219	0.0190735	0.0327932	0.0119632	0.0255872	-0.000176352	0.0232861
Q1/2014	-0.00921869	0.0333877	0.00301136	0.0350529	0.00140876	0.00497467	0.0387443	0.0157856		Q1/2014	0.0166086	0.00214946	-0.00666962	0.0222361	-0.00171665	0.0163437	-0.0185178	0.0141942
Q2/2014	0.0449955	0.0331537	0.00991468	-0.00676076	-0.00285226	0.0476646	-0.0739985	0.0154286		Q2/2014	0.0224478	0.00768035	0.00494498	0.0251361	0.00691584	0.00939358	0.000440567	0.0162588
Q3/2014	0.0508029	0.0279355	0.0178278	0.0127605	0.00959249	0.0290266	-0.00159217	0.0271199		Q3/2014	0.0181877	0.00975379	0.00514966	0.0176275	0.0029915	-0.00393844	0.0123542	0.00752215
Q4/2014	0.019953	0.0265359	0.00438157	0.0354397	9.52574e-05	0.0181284	0.0248829	0.0298919		Q4/2014	0.00576692	-0.00294163	-0.00492798	0.00111711	-0.00941554	-0.0278696	0.0138047	-0.00976307
Q1/2015	0.0318694	0.0177073	0.0167997	0.00445471	0.00909415	-0.00801586	0.0595136	0.0418646		Q1/2015	-0.000691564	-0.0115988	-0.0065239	-0.00985193	-0.0144378	-0.045513	0.0209178	-0.0196798
Q2/2015	0.0270446	0.0226981	-0.000878169	0.0177676	0.0165887	-0.00579193	-0.00285679	0.0337948		Q2/2015	0.0215568	0.0269346	0.0186285	0.0165209	0.0221529	-0.0128624	0.0436099	0.00943155
Q3/2015	0.0161747	0.0172738	0.01516	0.0129064	0.00888613	0.0225559	0.00345841	0.0373964		Q3/2015	0.0134425	0.0130899	0.0108	0.0109184	0.0271951	-0.0114139	0.0353177	0.00487192
Q4/2015	0.00484528	0.0296165	0.0100015	0.0168994	0.0114314	0.0041548	-0.012398	0.0365341		Q4/2015	0.00819861	0.013378	0.00588706	0.00717249	0.0355855	-0.00996025	0.0297965	0.00381493
Q1/2016	0.00578623	0.0129504	0.0261555	0.025216	0.0092221	0.0245775	0.0337855	0.0298582		Q1/2016	0.00250844	0.0141216	0.00135816	0.0036351	0.0436366	-0.00599285	0.023473	0.00390644
Q2/2016	0.0221316	0.00625153	-0.00916203	0.0185359	0.00386449	-0.0104968	0.00872994	0.0313649		Q2/2016	0.0240617	0.0233871	0.0255387	0.0256938	0.05195	0.0194708	0.0349497	0.0248292
Q3/2016	0.0274226	0.0188261	0.00793045	0.0133944	0.00918897	0.0418319	0.00753602	0.0284406		Q3/2016	0.0135985	-0.00106994	0.0134111	0.0134645	0.0250024	0.0156218	0.012747	0.01347
Q4/2016	0.0174304	0.0295487	0.0242408	0.01659	0.0192874	0.0221401	0.00993389	0.0272091		Q4/2016	0.0200704	0.0114711	0.0205971	0.0186272	0.0152925	0.027234	0.00725722	0.0192315
Q1/2017	0.0122816	0.0156561	0.0307645	0.03583	0.020222	0.0392997	0.0268777	0.0313319		Q1/2017	0.0197833	0.000138883	0.0197406	0.0178072	0.000190827	0.0296868	-0.00397758	0.0198478
Q2/2017	0.0301394	0.00849789	0.026254	0.0252454	0.0157265	0.0445755	0.0210519	0.0344417		Q2/2017	0.0100208	-0.0110898	0.00993548	0.00644577	-0.00552171	0.016034	-0.00942387	0.00855648
Q3/2017	0.0310713	0.0140301	0.0271895	0.0293118	0.0136884	0.0163707	0.0197812	0.027733		Q3/2017	0.0206639	-0.00309964	0.0203219	0.0188321	0.010422	0.0237441	0.00822605	0.0205085
Q4/2017	0.0284706	0.0141957	0.0269778	0.0242055	0.0140495	0.0169474	0.0101948	0.0269726		Q4/2017	0.0231927	0.0259673	0.0232983	0.0235196	0.018144	0.027506	0.0174949	0.0224726
