# Supplementary material for: Modeling time-variation over the business cycle (1960–2017): an international perspective
Source: publisher site journal article supplement (doi:10.1515/snde-2017-0101), 2018-11-22
Supplement: Supplementary file 13 [file G8data.7.1.2018_GDP_By_Expenditure.xlsx]

## Sheet: C
Q1/1960 !Q mag=bil	.excel_last	Q111cc@OUTLOOK	Q112cc@OUTLOOK	Q132cc@OUTLOOK		Q136cc@OUTLOOK	Q156cc@OUTLOOK	Q158cc@OUTLOOK	Q184cc@OUTLOOK							GERMANY	Q1/1960 !Q mag=bil	S134NCPC@G10	(Q134cc@OUTLOOK)						Q1/1960 !Q	(Q134CCP@OUTLOOK)	(Q134CCP@OUTLOOK) - historical
.DESC		United States: Private Final Consumption Expenditure, Vol(SAAR,Bil.Chn.2009.US$)	UK: Private Final Consumption Expenditure, Volume(SAAR,Bil.Chn.2015.Pound)	France: Private Final Consumption Expenditure, Volume(SAAR,Bil.Chn.2010.Euro)	Germany: GDP: Private Consumption Expenditure (SA/WDA, Bil.Chn.2010.Euros)	Italy: Private Final Consumption Expenditure, Volume(SAAR,Bil.Chn.2010.Euro)	Canada: Private Final Consumption Expenditure, Volume(SAAR,Bil.Chn.2007.C$)	Japan: Private Final Consumption Expenditure, Volume(SAAR,Bil.Chn.2011.Yen)	Spain: Private Final Consumption Expenditure, Volume(SAAR,Bil.Chn.2010.Euro)								.DESC	Germany: GDP: Private Consumption Expenditure (SWDA, Bil.Chn.2010.Euros)	Germany: Private Final Consumption Expenditure, Volume(SAAR,Bil.Chn.2010.Euro)	Germany: Private Final Consumption Expenditure, Volume(Bil.Ch.2010.EUR)	Series Comparison				.DESC	Germany: Private Final Consumption Expend Growth, Volume (Annualized % Change)	Germany: Private Final Consump Expenditure Growth, Volume(Annualized % Change)	Comparison
.T1		Q1-1960	Q1-1960	Q1-1960	Q1-1960	Q1-1960	Q1-1961	Q1-1960	Q1-1960								.T1	Q1-1970	Q1-1991	Spliced					.T1	Q2-1991	Q2-1960
.TN		Q4-2019	Q4-2019	Q4-2019	Q4-2019	Q4-2019	Q4-2019	Q4-2019	Q4-2019								.TN	Q1-2018	Q4-2019						.TN	Q4-2019	Q4-2015
.LSOURCE		Organization for Economic Cooperation & Development	Organization for Economic Cooperation & Development	Organization for Economic Cooperation & Development	Organization for Economic Cooperation & Devt	Organization for Economic Cooperation & Development	Organization for Economic Cooperation & Development	Organization for Economic Cooperation & Development	Organization for Economic Cooperation & Development								.LSOURCE	Deutsche Bundesbank	Organization for Economic Cooperation & Development				Series Difference	Growth Rate Implied by the Spliced Series	.LSOURCE	Organization for Economic Cooperation & Development	Organization for Economic Cooperation & Devt				Historical Germany Series
.DTLM		May-30-2018 07:53	May-30-2018 07:53	May-30-2018 07:53		May-30-2018 07:53	May-30-2018 07:53	May-30-2018 07:53	May-30-2018 07:53								.DTLM	May-24-2018 01:20	May-30-2018 07:53						.DTLM	May-30-2018 07:53	May-09-2014 15:38
Q1/1960	1960-03-31	1876.35	275.124	245.74	396.586	215.192	#N/A	39996	106.468								Q1/1960	#N/A	#N/A	396.586	#N/A	33.5551	#N/A		Q1/1960	#N/A	#N/A				396.586
Q2/1960	1960-06-30	1900.06	274.534	249.165	398.299	219.739	#N/A	40051	105.19								Q2/1960	#N/A	#N/A	398.299	#N/A	33.7	#N/A	1.7388	Q2/1960	#N/A	1.7388				398.299
Q3/1960	1960-09-30	1892.45	276.083	251.539	401.724	223.981	#N/A	41356	105.958								Q3/1960	#N/A	#N/A	401.724	#N/A	33.9898	#N/A	3.4849	Q3/1960	#N/A	3.4849				401.724
Q4/1960	1960-12-31	1894.94	275.967	255.51	407.32	227.974	#N/A	42640	108.683								Q4/1960	#N/A	#N/A	407.32	#N/A	34.4633	#N/A	5.6889	Q4/1960	#N/A	5.6889				407.32
Q1/1961	1961-03-31	1894.41	281.174	261.496	415.085	232.505	175.951	43789	113.367								Q1/1961	#N/A	#N/A	415.085	#N/A	35.1203	#N/A	7.8466	Q1/1961	#N/A	7.8466				415.085
Q2/1961	1961-06-30	1922.64	281.224	263.764	422.278	236.209	179.303	44836	117.192								Q2/1961	#N/A	#N/A	422.278	#N/A	35.7289	#N/A	7.114	Q2/1961	#N/A	7.114				422.278
Q3/1961	1961-09-30	1932	282.289	266.029	428.899	240.079	183.604	45612	120.157								Q3/1961	#N/A	#N/A	428.899	#N/A	36.2891	#N/A	6.4207	Q3/1961	#N/A	6.4207				428.899
Q4/1961	1961-12-31	1970.75	282.44	269.294	435.631	244.418	184.315	46862	122.508								Q4/1961	#N/A	#N/A	435.631	#N/A	36.8587	#N/A	6.4279	Q4/1961	#N/A	6.4279				435.631
Q1/1962	1962-03-31	1991.68	285.17	277.402	442.474	246.078	188.514	47633	124.246								Q1/1962	#N/A	#N/A	442.474	#N/A	37.4377	#N/A	6.4332	Q1/1962	#N/A	6.4332				442.474
Q2/1962	1962-06-30	2016.14	289.898	281.773	448.071	252.097	189.704	48294	126.712								Q2/1962	#N/A	#N/A	448.071	#N/A	37.9112	#N/A	5.1562	Q2/1962	#N/A	5.1562				448.071
Q3/1962	1962-09-30	2032.47	288.293	286.358	452.421	258.506	188.983	48718	129.908								Q3/1962	#N/A	#N/A	452.421	#N/A	38.2793	#N/A	3.9401	Q3/1962	#N/A	3.9401				452.421
Q4/1962	1962-12-31	2061.3	292.274	288.95	455.248	264.62	192.652	50125	133.934								Q4/1962	#N/A	#N/A	455.248	#N/A	38.5185	#N/A	2.5231	Q4/1962	#N/A	2.5231				455.248
Q1/1963	1963-03-31	2075.23	297.85	294.086	456.552	274.601	194.113	50988	138.791								Q1/1963	#N/A	#N/A	456.552	#N/A	38.6288	#N/A	1.151	Q1/1963	#N/A	1.151				456.552
Q2/1963	1963-06-30	2095.1	307.118	302.289	459.348	278.262	197.075	52284	142.524								Q2/1963	#N/A	#N/A	459.348	#N/A	38.8654	#N/A	2.4722	Q2/1963	#N/A	2.4722				459.348
Q3/1963	1963-09-30	2123.67	310.126	307.961	463.636	280.717	198.27	53805	145.133								Q3/1963	#N/A	#N/A	463.636	#N/A	39.2282	#N/A	3.7861	Q3/1963	#N/A	3.7861				463.636
Q4/1963	1963-12-31	2141.37	309.318	311.879	468.976	282.426	201.489	54804	146.638								Q4/1963	#N/A	#N/A	468.976	#N/A	39.68	#N/A	4.6872	Q4/1963	#N/A	4.6872				468.976
Q1/1964	1964-03-31	2183.58	313.335	317.837	475.368	285.479	205.489	56838	147.039								Q1/1964	#N/A	#N/A	475.368	#N/A	40.2208	#N/A	5.5647	Q1/1964	#N/A	5.5647				475.368
Q2/1964	1964-06-30	2221.99	314.409	318.539	482.433	287.029	205.857	58764	148.169								Q2/1964	#N/A	#N/A	482.433	#N/A	40.8186	#N/A	6.0787	Q2/1964	#N/A	6.0787				482.433
Q3/1964	1964-09-30	2262.83	316.751	321.043	490.171	288.968	209.79	59383	150.026								Q3/1964	#N/A	#N/A	490.171	#N/A	41.4733	#N/A	6.5715	Q3/1964	#N/A	6.5715				490.171
Q4/1964	1964-12-31	2269.2	321.372	324.784	499.163	291.513	211.292	59739	152.397								Q4/1964	#N/A	#N/A	499.163	#N/A	42.2341	#N/A	7.5425	Q4/1964	#N/A	7.5425				499.163
Q1/1965	1965-03-31	2319.79	320.424	324.184	509.41	290.389	213.454	60396	155.281								Q1/1965	#N/A	#N/A	509.41	#N/A	43.1011	#N/A	8.4677	Q1/1965	#N/A	8.4677				509.41
Q2/1965	1965-06-30	2345.51	320.399	331.818	517.799	294.726	218.561	61150	158.134								Q2/1965	#N/A	#N/A	517.799	#N/A	43.8109	#N/A	6.7521	Q2/1965	#N/A	6.7521				517.799
Q3/1965	1965-09-30	2385.88	324.465	337.386	524.331	299.876	221.836	62581	160.957								Q3/1965	#N/A	#N/A	524.331	#N/A	44.3636	#N/A	5.1422	Q3/1965	#N/A	5.1422				524.331
Q4/1965	1965-12-31	2452.94	325.52	338.312	529.391	305.611	226.189	64120	163.88								Q4/1965	#N/A	#N/A	529.391	#N/A	44.7917	#N/A	3.9163	Q4/1965	#N/A	3.9163				529.391
Q1/1966	1966-03-31	2489.06	330.364	341.387	532.979	309.765	227.992	65985	166.904								Q1/1966	#N/A	#N/A	532.979	#N/A	45.0953	#N/A	2.7385	Q1/1966	#N/A	2.7385				532.979
Q2/1966	1966-06-30	2495.35	333.361	347.644	535.894	315.989	228.896	67298	169.784								Q2/1966	#N/A	#N/A	535.894	#N/A	45.342	#N/A	2.2061	Q2/1966	#N/A	2.2061				535.894
Q3/1966	1966-09-30	2523.76	328.149	349.399	538.138	322.131	233.217	68758	172.519								Q3/1966	#N/A	#N/A	538.138	#N/A	45.5318	#N/A	1.6849	Q3/1966	#N/A	1.6849				538.138
Q4/1966	1966-12-31	2534.18	328.865	355.178	539.012	327.976	233.157	71091	175.12								Q4/1966	#N/A	#N/A	539.012	#N/A	45.6057	#N/A	0.6514	Q4/1966	#N/A	0.6514				539.012
Q1/1967	1967-03-31	2548.94	332.054	360.39	538.517	335.775	235.041	72627	177.587								Q1/1967	#N/A	#N/A	538.517	#N/A	45.5639	#N/A	-0.3666	Q1/1967	#N/A	-0.3666				538.517
Q2/1967	1967-06-30	2583.71	337.201	363.128	540.034	340.482	239.323	74854	180.102								Q2/1967	#N/A	#N/A	540.034	#N/A	45.6922	#N/A	1.1315	Q2/1967	#N/A	1.1315				540.034
Q3/1967	1967-09-30	2596.87	344.35	367.308	543.563	344.789	239.063	76698	182.663								Q3/1967	#N/A	#N/A	543.563	#N/A	45.9908	#N/A	2.6393	Q3/1967	#N/A	2.6393				543.563
Q4/1967	1967-12-31	2612.71	347.559	369.866	548.564	349.015	243.394	77335	185.175								Q4/1967	#N/A	#N/A	548.564	#N/A	46.414	#N/A	3.7317	Q4/1967	#N/A	3.7317				548.564
Q1/1968	1968-03-31	2674.8	358.377	370.385	553.637	352.133	245.851	78248	187.637								Q1/1968	#N/A	#N/A	553.637	#N/A	46.8432	#N/A	3.7509	Q1/1968	#N/A	3.7509				553.637
Q2/1968	1968-06-30	2715.62	345.486	368.863	563.157	357.11	246.46	80879	190.447								Q2/1968	#N/A	#N/A	563.157	#N/A	47.6487	#N/A	7.0573	Q2/1968	#N/A	7.0573				563.157
Q3/1968	1968-09-30	2766.57	352.035	386.679	573.32	362.696	251.103	82785	193.602								Q3/1968	#N/A	#N/A	573.32	#N/A	48.5086	#N/A	7.4165	Q3/1968	#N/A	7.4165				573.32
Q4/1968	1968-12-31	2779.12	352.595	396.609	582.473	368.94	254.628	85351	197.203								Q4/1968	#N/A	#N/A	582.473	#N/A	49.283	#N/A	6.5403	Q4/1968	#N/A	6.5403				582.473
Q1/1969	1969-03-31	2810.22	352.56	395.56	598.176	372.533	260.099	87170	201.248								Q1/1969	#N/A	#N/A	598.176	#N/A	50.6116	#N/A	11.2279	Q1/1969	#N/A	11.2279				598.176
Q2/1969	1969-06-30	2828.2	355.97	406.403	607.672	380.139	258.775	89580	204.753								Q2/1969	#N/A	#N/A	607.672	#N/A	51.415	#N/A	6.5023	Q2/1969	#N/A	6.5023				607.672
Q3/1969	1969-09-30	2841.91	356.646	410.627	619.506	387.927	261.361	90737	207.72								Q3/1969	#N/A	#N/A	619.506	#N/A	52.4163	#N/A	8.0206	Q3/1969	#N/A	8.0206				619.506
Q4/1969	1969-12-31	2864.64	359.628	407.777	628.441	395.32	264.35	93613	210.197								Q4/1969	#N/A	#N/A	628.441	#N/A	53.1723	#N/A	5.8951	Q4/1969	#N/A	5.8951				628.441
Q1/1970	1970-03-31	2882.33	361.48	415.951	639.543	407.919	261.702	94868	213.812								Q1/1970	159.75	#N/A	639.543	54.0994	54.1117	-0.012334	7.2561	Q1/1970	#N/A	7.2561				639.543
Q2/1970	1970-06-30	2895.61	367.474	420.97	655.422	409.672	263.394	95509	214.521								Q2/1970	163.72	#N/A	655.422	55.4438	55.4552	-0.011401	10.3074	Q2/1970	#N/A	10.3074	#N/A	#N/A	#N/A	655.422
Q3/1970	1970-09-30	2921.06	373.348	423.808	669.676	415.578	268.191	99028	215.939								Q3/1970	167.27	#N/A	669.676	56.646	56.6612	-0.0152298	8.9871	Q3/1970	#N/A	8.9871	#N/A	#N/A	#N/A	669.676
Q4/1970	1970-12-31	2913.13	371.708	434.238	677.856	419.577	270.669	98370	218.079								Q4/1970	169.29	#N/A	677.856	57.3301	57.3533	-0.0231978	4.9757	Q4/1970	#N/A	4.9757	#N/A	#N/A	#N/A	677.856
Q1/1971	1971-03-31	2968.9	370.749	437.99	679.258	425.102	268.528	99976	220.921								Q1/1971	169.69	#N/A	679.258	57.4655	57.4719	-0.00637712	0.83	Q1/1971	#N/A	0.83	#N/A	#N/A	#N/A	679.258
Q2/1971	1971-06-30	2996.12	379.317	444.688	693.556	429.992	278.111	101687	224.324								Q2/1971	173.26	#N/A	693.556	58.6745	58.6817	-0.0072054	8.6898	Q2/1971	#N/A	8.6898	#N/A	#N/A	#N/A	693.556
Q3/1971	1971-09-30	3020.04	385.704	451.06	701.539	431.464	284.379	102945	228.282								Q3/1971	175.25	#N/A	701.539	59.3484	59.3571	-0.00866165	4.6837	Q3/1971	#N/A	4.6837	#N/A	#N/A	#N/A	701.539
Q4/1971	1971-12-31	3070.23	389.14	456.025	710.454	432.397	290.219	104472	232.8								Q4/1971	177.42	#N/A	710.454	60.0833	60.1114	-0.0281266	5.1811	Q4/1971	#N/A	5.1811	#N/A	#N/A	#N/A	710.454
Q1/1972	1972-03-31	3110.8	394.766	463.136	722.913	438.358	291.28	107268	237.866								Q1/1972	180.56	#N/A	722.913	61.1467	61.1656	-0.0188831	7.2011	Q1/1972	#N/A	7.2011	#N/A	#N/A	#N/A	722.913
Q2/1972	1972-06-30	3170.16	404.595	464.253	725.464	441.857	298.647	110237	242.906								Q2/1972	181.25	#N/A	725.464	61.3803	61.3815	-0.0011147	1.4194	Q2/1972	#N/A	1.4194	#N/A	#N/A	#N/A	725.464
Q3/1972	1972-09-30	3219.1	410.428	474.367	739.568	445.174	300.742	112685	247.908								Q3/1972	184.75	#N/A	739.568	62.5656	62.5748	-0.00915242	8.0061	Q3/1972	#N/A	8.0061	#N/A	#N/A	#N/A	739.568
Q4/1972	1972-12-31	3294.61	414.818	478.391	746.233	450.761	307.465	115611	252.871								Q4/1972	186.38	#N/A	746.233	63.1176	63.1387	-0.0210882	3.6539	Q4/1972	#N/A	3.6539	#N/A	#N/A	#N/A	746.233
Q1/1973	1973-03-31	3354.76	430.974	489.579	750.157	458.048	315.474	118875	257.801								Q1/1973	187.36	#N/A	750.157	63.4495	63.4707	-0.0211716	2.1197	Q1/1973	#N/A	2.1197	#N/A	#N/A	#N/A	750.157
Q2/1973	1973-06-30	3353.36	428.022	492.982	759.963	465.883	317.534	119187	262.461								Q2/1973	189.81	#N/A	759.963	64.2792	64.3004	-0.0212096	5.3325	Q2/1973	#N/A	5.3325	#N/A	#N/A	#N/A	759.963
Q3/1973	1973-09-30	3365.33	432.139	495.422	757.69	471.515	319.919	121577	266.863								Q3/1973	189.27	#N/A	757.69	64.0963	64.108	-0.0117327	-1.1912	Q3/1973	#N/A	-1.1912	#N/A	#N/A	#N/A	757.69
Q4/1973	1973-12-31	3355.49	428.31	506.675	754.409	476.332	325.871	125424	270.995								Q4/1973	188.44	#N/A	754.409	63.8152	63.8305	-0.0152543	-1.7206	Q4/1973	#N/A	-1.7206	#N/A	#N/A	#N/A	754.409
Q1/1974	1974-03-31	3326.2	421.064	507.695	748.567	477.613	334.739	117891	274.869								Q1/1974	186.99	#N/A	748.567	63.3242	63.3362	-0.0120106	-3.0617	Q1/1974	#N/A	-3.0617	#N/A	#N/A	#N/A	748.567
Q2/1974	1974-06-30	3337.86	422.699	510.839	752.109	484.455	336.573	121051	277.672								Q2/1974	187.86	#N/A	752.109	63.6188	63.6359	-0.0170642	1.9061	Q2/1974	#N/A	1.9061	#N/A	#N/A	#N/A	752.109
Q3/1974	1974-09-30	3351.62	427.477	511.444	759.474	485.027	337.834	123451	279.413								Q3/1974	189.7	#N/A	759.474	64.2419	64.259	-0.0171004	3.9749	Q3/1974	#N/A	3.9749	#N/A	#N/A	#N/A	759.474
Q4/1974	1974-12-31	3302.48	428.375	509.453	757.937	481.51	333.549	122261	280.102								Q4/1974	189.34	#N/A	757.937	64.12	64.129	-0.00896145	-0.8071	Q4/1974	#N/A	-0.8071	#N/A	#N/A	#N/A	757.937
Q1/1975	1975-03-31	3330.13	426.645	510.043	773.944	478.554	340.889	125023	279.722								Q1/1975	193.35	#N/A	773.944	65.478	65.4833	-0.00528495	8.7188	Q1/1975	#N/A	8.7188	#N/A	#N/A	#N/A	773.944
Q2/1975	1975-06-30	3385.74	427.225	514.111	776.843	478.986	344.869	126280	280.889								Q2/1975	194.04	#N/A	776.843	65.7117	65.7286	-0.0169426	1.507	Q2/1975	#N/A	1.507	#N/A	#N/A	#N/A	776.843
Q3/1975	1975-09-30	3434.09	422.79	521.986	784.704	485.654	351.183	126906	283.602								Q3/1975	195.96	#N/A	784.704	66.3619	66.3937	-0.031802	4.1092	Q3/1975	#N/A	4.1092	#N/A	#N/A	#N/A	784.704
Q4/1975	1975-12-31	3470.49	418.91	531.755	794.606	495.466	357.032	127789	287.869								Q4/1975	198.49	#N/A	794.606	67.2187	67.2315	-0.0128311	5.1439	Q4/1975	#N/A	5.1439	#N/A	#N/A	#N/A	794.606
Q1/1976	1976-03-31	3539.87	420.968	538.831	802.122	501.397	356.818	128112	293.689								Q1/1976	200.36	#N/A	802.122	67.8519	67.8675	-0.0155433	3.8379	Q1/1976	#N/A	3.8379	#N/A	#N/A	#N/A	802.122
Q2/1976	1976-06-30	3572.44	423.209	543.627	808.857	504.821	366.197	129083	298.085								Q2/1976	202.03	#N/A	808.857	68.4175	68.4373	-0.0198075	3.4009	Q2/1976	#N/A	3.4009	#N/A	#N/A	#N/A	808.857
Q3/1976	1976-09-30	3610.33	426.614	550.952	813.309	510.315	367.484	131245	301.069								Q3/1976	203.18	#N/A	813.309	68.8069	68.814	-0.00703147	2.2198	Q3/1976	#N/A	2.2198	#N/A	#N/A	#N/A	813.309
Q4/1976	1976-12-31	3657.46	427.185	556.072	823.743	512.911	374.958	132271	302.635								Q4/1976	205.75	#N/A	823.743	69.6773	69.6968	-0.019532	5.2313	Q4/1976	#N/A	5.2313	#N/A	#N/A	#N/A	823.743
Q1/1977	1977-03-31	3699.29	419.546	556.207	834.361	517.901	373.411	133539	302.783								Q1/1977	208.35	#N/A	834.361	70.5578	70.5951	-0.0373913	5.2563	Q1/1977	#N/A	5.2563	#N/A	#N/A	#N/A	834.361
Q2/1977	1977-06-30	3719.73	416.952	557.507	848.182	520.324	372.655	135218	303.061								Q2/1977	211.85	#N/A	848.182	71.743	71.7646	-0.0215471	6.7926	Q2/1977	#N/A	6.7926	#N/A	#N/A	#N/A	848.182
Q3/1977	1977-09-30	3755.19	421.735	564.408	855.231	526.411	378.258	136026	303.492								Q3/1977	213.63	#N/A	855.231	72.3458	72.361	-0.0151724	3.366	Q3/1977	#N/A	3.366	#N/A	#N/A	#N/A	855.231
Q4/1977	1977-12-31	3811.77	430.136	567.026	857.849	529.553	381.859	136930	304.066								Q4/1977	214.28	#N/A	857.849	72.566	72.5825	-0.0165767	1.2302	Q4/1977	#N/A	1.2302	#N/A	#N/A	#N/A	857.849
Q1/1978	1978-03-31	3833.83	438.467	573.691	867.115	533.547	384.537	139621	304.769								Q1/1978	216.62	#N/A	867.115	73.3584	73.3665	-0.00809885	4.3909	Q1/1978	#N/A	4.3909	#N/A	#N/A	#N/A	867.115
Q2/1978	1978-06-30	3915.62	440.778	582.443	870.181	533.082	387.198	140662	305.581								Q2/1978	217.38	#N/A	870.181	73.6158	73.6259	-0.0101451	1.4219	Q2/1978	#N/A	1.4219	#N/A	#N/A	#N/A	870.181
Q3/1978	1978-09-30	3932.01	449.547	584.244	889.749	536.15	389.098	143245	306.483								Q3/1978	222.26	#N/A	889.749	75.2684	75.2815	-0.0131629	9.3028	Q3/1978	#N/A	9.3028	#N/A	#N/A	#N/A	889.749
Q4/1978	1978-12-31	3963.52	447.619	592.235	898.122	544.863	390.283	146640	307.488								Q4/1978	224.36	#N/A	898.122	75.9795	75.99	-0.0104952	3.818	Q4/1978	#N/A	3.818	#N/A	#N/A	#N/A	898.122
Q1/1979	1979-03-31	3983.6	452.569	598.34	891.824	556.859	395.873	149401	308.591								Q1/1979	222.77	#N/A	891.824	75.4411	75.4572	-0.0160751	-2.7756	Q1/1979	#N/A	-2.7756	#N/A	#N/A	#N/A	891.824
Q2/1979	1979-06-30	3981.26	480.229	602.491	924.905	566.454	396.051	152175	309.622								Q2/1979	231.04	#N/A	924.905	78.2417	78.2561	-0.0143816	15.6834	Q2/1979	#N/A	15.6834	#N/A	#N/A	#N/A	924.905
Q3/1979	1979-09-30	4020.45	462.736	604.157	903.319	577.088	396.849	153033	310.569								Q3/1979	225.62	#N/A	903.319	76.4062	76.4297	-0.0234314	-9.0139	Q3/1979	#N/A	-9.0139	#N/A	#N/A	#N/A	903.319
Q4/1979	1979-12-31	4031.2	467.388	607.099	917.61	589.129	397.844	152540	311.446								Q4/1979	229.24	#N/A	917.61	77.6322	77.6388	-0.00668029	6.48	Q4/1979	#N/A	6.48	#N/A	#N/A	#N/A	917.61
Q1/1980	1980-03-31	4025.02	474.467	610.256	922.483	600.539	400.848	152682	312.958								Q1/1980	230.46	#N/A	922.483	78.0453	78.0511	-0.00583183	2.1412	Q1/1980	#N/A	2.1412	#N/A	#N/A	#N/A	922.483
Q2/1980	1980-06-30	3934.46	462.943	607.048	917.322	608.816	398.948	152386	312.778								Q2/1980	229.13	#N/A	917.322	77.5949	77.6145	-0.0195776	-2.2191	Q2/1980	#N/A	-2.2191	#N/A	#N/A	#N/A	917.322
Q3/1980	1980-09-30	3976.89	467.908	609.704	923.647	612.415	405.66	153832	311.801								Q3/1980	230.72	#N/A	923.647	78.1334	78.1496	-0.0162841	2.7867	Q3/1980	#N/A	2.7867	#N/A	#N/A	#N/A	923.647
Q4/1980	1980-12-31	4029.6	459.724	612.08	921.922	614.041	408.25	154692	310.135								Q4/1980	230.32	#N/A	921.922	77.9979	78.0037	-0.00580168	-0.7449	Q4/1980	#N/A	-0.7449	#N/A	#N/A	#N/A	921.922
Q1/1981	1981-03-31	4050.8	465.542	612.564	925.051	615.813	410.048	154467	310.373								Q1/1981	231.08	#N/A	925.051	78.2553	78.2685	-0.0131862	1.3646	Q1/1981	#N/A	1.3646	#N/A	#N/A	#N/A	925.051
Q2/1981	1981-06-30	4050.08	467.257	621.412	916.359	615.126	409.061	155522	308.681								Q2/1981	228.91	#N/A	916.359	77.5204	77.533	-0.0125983	-3.706	Q2/1981	#N/A	-3.706	#N/A	#N/A	#N/A	916.359
Q3/1981	1981-09-30	4066.36	468.963	623.256	916.201	628.137	406.843	156552	307.684								Q3/1981	228.87	#N/A	916.201	77.5069	77.5197	-0.0128439	-0.0686	Q3/1981	#N/A	-0.0686	#N/A	#N/A	#N/A	916.201
Q4/1981	1981-12-31	4035.87	468.115	630.604	919.855	623.097	407.076	157837	308.494								Q4/1981	229.78	#N/A	919.855	77.815	77.8288	-0.0137887	1.6046	Q4/1981	#N/A	1.6046	#N/A	#N/A	#N/A	919.855
Q1/1982	1982-03-31	4062.61	465.501	635.992	919.469	625.621	401.516	160216	307.922								Q1/1982	229.67	#N/A	919.469	77.7778	77.7961	-0.0183705	-0.1678	Q1/1982	#N/A	-0.1678	#N/A	#N/A	#N/A	919.469
Q2/1982	1982-06-30	4077.62	470.113	641.148	910.973	623.327	398.218	163109	308.874								Q2/1982	227.54	#N/A	910.973	77.0565	77.0773	-0.0208765	-3.645	Q2/1982	#N/A	-3.645	#N/A	#N/A	#N/A	910.973
Q3/1982	1982-09-30	4109.14	477.868	642.732	898.046	629.094	396.732	162647	309.331								Q3/1982	224.32	#N/A	898.046	75.966	75.9835	-0.0175474	-5.5566	Q3/1982	#N/A	-5.5566	#N/A	#N/A	#N/A	898.046
Q4/1982	1982-12-31	4184.1	482.868	650.528	908.235	627.373	395.369	166992	309.601								Q4/1982	226.85	#N/A	908.235	76.8228	76.8457	-0.0228673	4.6162	Q4/1982	#N/A	4.6162	#N/A	#N/A	#N/A	908.235
Q1/1983	1983-03-31	4224.78	486.698	648.496	915.916	615.717	400.863	166797	310.431								Q1/1983	228.77	#N/A	915.916	77.473	77.4955	-0.0225511	3.426	Q1/1983	#N/A	3.426	#N/A	#N/A	#N/A	915.916
Q2/1983	1983-06-30	4308.4	492.879	648.224	928.755	621.441	405.664	167601	310.604								Q2/1983	231.98	#N/A	928.755	78.5601	78.5818	-0.0217594	5.7259	Q2/1983	#N/A	5.7259	#N/A	#N/A	#N/A	928.755
Q3/1983	1983-09-30	4383.99	501.593	645.292	914.538	628.796	410.494	169750	309.717								Q3/1983	228.4	#N/A	914.538	77.3477	77.3789	-0.0312229	-5.9839	Q3/1983	#N/A	-5.9839	#N/A	#N/A	#N/A	914.538
Q4/1983	1983-12-31	4453.14	501.845	648.172	927.895	634.691	414.91	170332	309.8								Q4/1983	231.76	#N/A	927.895	78.4856	78.5091	-0.0235452	5.9716	Q4/1983	#N/A	5.9716	#N/A	#N/A	#N/A	927.895
Q1/1984	1984-03-31	4490.87	506.588	650.892	935.154	637.939	418.358	171664	308.81								Q1/1984	233.54	#N/A	935.154	79.0884	79.1233	-0.0349416	3.1662	Q1/1984	#N/A	3.1662	#N/A	#N/A	#N/A	935.154
Q2/1984	1984-06-30	4554.91	509.106	652.8	939.113	643.099	422.715	172697	307.793								Q2/1984	234.58	#N/A	939.113	79.4405	79.4582	-0.0176976	1.7041	Q2/1984	#N/A	1.7041	#N/A	#N/A	#N/A	939.113
Q3/1984	1984-09-30	4589.93	507.204	655.004	943.858	646.716	423.242	174771	310.366								Q3/1984	235.78	#N/A	943.858	79.8469	79.8597	-0.0127668	2.0363	Q3/1984	#N/A	2.0363	#N/A	#N/A	#N/A	943.858
Q4/1984	1984-12-31	4650.6	517.345	650.632	943.664	647.797	430.697	174916	311.106								Q4/1984	235.74	#N/A	943.664	79.8334	79.8433	-0.00991658	-0.0821	Q4/1984	#N/A	-0.0821	#N/A	#N/A	#N/A	943.664
Q1/1985	1985-03-31	4729.66	523.562	659.94	947.405	654.806	436.342	177290	315.403								Q1/1985	236.61	#N/A	947.405	80.128	80.1598	-0.0317991	1.5951	Q1/1985	#N/A	1.5951	#N/A	#N/A	#N/A	947.405
Q2/1985	1985-06-30	4774.07	527.114	661.384	954.106	654.547	440.379	180113	315.139								Q2/1985	238.27	#N/A	954.106	80.6902	80.7268	-0.0366184	2.8594	Q2/1985	#N/A	2.8594	#N/A	#N/A	#N/A	954.106
Q3/1985	1985-09-30	4865.75	536.105	665.66	963.661	668.878	448.773	180704	317.127								Q3/1985	240.73	#N/A	963.661	81.5232	81.5352	-0.011982	4.0664	Q3/1985	#N/A	4.0664	#N/A	#N/A	#N/A	963.661
Q4/1985	1985-12-31	4878.25	544.536	672.956	972.514	671.785	453.528	184519	318.664								Q4/1985	242.86	#N/A	972.514	82.2446	82.2843	-0.0397508	3.7259	Q4/1985	#N/A	3.7259	#N/A	#N/A	#N/A	972.514
Q1/1986	1986-03-31	4919.63	559.214	678.644	980.727	676.764	453.031	185013	319.828								Q1/1986	244.99	#N/A	980.727	82.9659	82.9792	-0.0133107	3.421	Q1/1986	#N/A	3.421	#N/A	#N/A	#N/A	980.727
Q2/1986	1986-06-30	4974.63	568.579	690.024	995.447	685.355	458.265	186195	325.148								Q2/1986	248.64	#N/A	995.447	84.202	84.2247	-0.0226885	6.1402	Q2/1986	#N/A	6.1402	#N/A	#N/A	#N/A	995.447
Q3/1986	1986-09-30	5064.7	572.378	693.364	1001.19	697.316	464.746	188888	328.557								Q3/1986	250.08	#N/A	1001.19	84.6896	84.7104	-0.0207287	2.3267	Q3/1986	#N/A	2.3267	#N/A	#N/A	#N/A	1001.19
Q4/1986	1986-12-31	5097.12	576.672	695.016	1006.14	697.872	464.756	189390	335.89								Q4/1986	251.35	#N/A	1006.14	85.1197	85.1295	-0.00980274	1.994	Q4/1986	#N/A	1.994	#N/A	#N/A	#N/A	1006.14
Q1/1987	1987-03-31	5097.89	585.653	701.356	1001.27	702.386	469.143	192007	340.444								Q1/1987	250.08	#N/A	1001.27	84.6896	84.717	-0.0273843	-1.9242	Q1/1987	#N/A	-1.9242	#N/A	#N/A	#N/A	1001.27
Q2/1987	1987-06-30	5168.61	596.602	710.264	1031.19	713.824	476.788	193741	345.049								Q2/1987	257.56	#N/A	1031.19	87.2227	87.2487	-0.0259863	12.5003	Q2/1987	#N/A	12.5003	#N/A	#N/A	#N/A	1031.19
Q3/1987	1987-09-30	5228.52	611.664	712.2	1035.64	718.773	480.831	196431	349.134								Q3/1987	258.65	#N/A	1035.64	87.5919	87.6256	-0.0337657	1.7392	Q3/1987	#N/A	1.7392	#N/A	#N/A	#N/A	1035.64
Q4/1987	1987-12-31	5239.48	625.085	724.876	1052.43	722.793	486.61	200006	352.742								Q4/1987	262.91	#N/A	1052.43	89.0345	89.0457	-0.0112208	6.6419	Q4/1987	#N/A	6.6419	#N/A	#N/A	#N/A	1052.43
Q1/1988	1988-03-31	5332.66	640.267	725.176	1030.53	732.953	489.914	202278	357.136								Q1/1988	257.38	#N/A	1030.53	87.1618	87.1927	-0.0309032	-8.0678	Q1/1988	#N/A	-8.0678	#N/A	#N/A	#N/A	1030.53
Q2/1988	1988-06-30	5371.79	648.31	729.276	1054.17	736.611	496.863	205737	360.686								Q2/1988	263.27	#N/A	1054.17	89.1564	89.1936	-0.0371457	9.5	Q2/1988	#N/A	9.5	#N/A	#N/A	#N/A	1054.17
Q3/1988	1988-09-30	5417.67	664.184	738.836	1067.14	747.842	499.973	206149	365.536								Q3/1988	266.56	#N/A	1067.14	90.2706	90.2908	-0.0202566	5.0124	Q3/1988	#N/A	5.0124	#N/A	#N/A	#N/A	1067.14
Q4/1988	1988-12-31	5479.7	671.409	745.728	1069.06	755.936	506.583	208281	371.866								Q4/1988	267.03	#N/A	1069.06	90.4297	90.453	-0.023245	0.7203	Q4/1988	#N/A	0.7203	#N/A	#N/A	#N/A	1069.06
Q1/1989	1989-03-31	5504.97	674.563	753.232	1076.58	761.335	510.316	214587	376.22								Q1/1989	268.87	#N/A	1076.58	91.0529	91.0889	-0.0360593	2.842	Q1/1989	#N/A	2.842	#N/A	#N/A	#N/A	1076.58
Q2/1989	1989-06-30	5530.92	679.588	754.616	1077.71	766.96	517.062	210755	382.344								Q2/1989	269.16	#N/A	1077.71	91.1511	91.1848	-0.0337752	0.4219	Q2/1989	#N/A	0.4219	#N/A	#N/A	#N/A	1077.71
Q3/1989	1989-09-30	5585.85	681.541	762.796	1095.56	779.291	515.653	215460	387.155								Q3/1989	273.61	#N/A	1095.56	92.6581	92.6955	-0.0374836	6.7935	Q3/1989	#N/A	6.7935	#N/A	#N/A	#N/A	1095.56
Q4/1989	1989-12-31	5610.53	689.225	768.712	1112.46	784.235	519.03	221379	388.474								Q4/1989	277.87	#N/A	1112.46	94.1007	94.1254	-0.0246779	6.3143	Q4/1989	#N/A	6.3143	#N/A	#N/A	#N/A	1112.46
Q1/1990	1990-03-31	5658.69	695.542	774.924	1120.67	781.683	527.28	220587	391.877								Q1/1990	279.93	#N/A	1120.67	94.7983	94.8196	-0.0212805	2.983	Q1/1990	#N/A	2.983	#N/A	#N/A	#N/A	1120.67
Q2/1990	1990-06-30	5676.42	703.499	778.184	1133.36	791.586	521.502	228090	395.357								Q2/1990	283.11	#N/A	1133.36	95.8752	95.8937	-0.0184491	4.6086	Q2/1990	#N/A	4.6086	#N/A	#N/A	#N/A	1133.36
Q3/1990	1990-09-30	5699.3	699.342	779.064	1144.3	789.756	521.8	230231	399.493								Q3/1990	285.82	#N/A	1144.3	96.793	96.819	-0.0260035	3.9159	Q3/1990	#N/A	3.9159	#N/A	#N/A	#N/A	1144.3
Q4/1990	1990-12-31	5656.17	695.224	784.576	1152.18	793.085	520.19	228053	401.326								Q4/1990	287.81	#N/A	1152.18	97.4669	97.4859	-0.0190269	2.784	Q4/1990	#N/A	2.784	#N/A	#N/A	#N/A	1152.18
Q1/1991	1991-03-31	5636.71	688.928	783.2	1181.89	805.499	509.706	228855	403.043								Q1/1991	295.29	1181.89	1181.89	100	100	0	10.7216	Q1/1991	#N/A	10.7216	#N/A	#N/A	#N/A	1181.89
Q2/1991	1991-06-30	5684.02	680.784	785.968	1194.91	805.703	518.324	232207	405.526								Q2/1991	298.5	1194.91	1194.91	101.087	101.101	-0.0142999	4.47878	Q2/1991	4.4786	5.3415	4.47878	-0.000183889	0.862716	1194.91
Q3/1991	1991-09-30	5711.64	682.151	783.24	1161.21	815.017	518.101	231484	410.53								Q3/1991	290.16	1161.21	1161.21	98.2627	98.2501	0.0126264	-10.8125	Q3/1991	-10.8123	-9.5146	-10.8125	0.00022547	1.29793	1161.21
Q4/1991	1991-12-31	5710.05	678.665	786.784	1191.59	816.735	521.131	234247	414.782								Q4/1991	297.71	1191.59	1191.59	100.82	100.82	-0.000336445	10.8798	Q4/1991	10.8798	12.0674	10.8798	-3.05208e-05	1.18757	1191.59
Q1/1992	1992-03-31	5817.32	677.338	788.248	1212.52	823.267	521.259	237643	419.529								Q1/1992	302.91	1212.52	1212.52	102.581	102.591	-0.0106637	7.215	Q1/1992	7.215	7.048	7.215	4.15153e-06	-0.166996	1212.52
Q2/1992	1992-06-30	5857.17	689.705	789.868	1206.59	831.585	523.403	236484	419.671								Q2/1992	301.43	1206.59	1206.59	102.079	102.09	-0.0102139	-1.94163	Q2/1992	-1.9418	-4.7498	-1.94163	-0.000172972	-2.80817	1206.59
Q3/1992	1992-09-30	5920.6	699.206	794.248	1208.04	826.832	526.186	236558	416.467								Q3/1992	301.83	1208.04	1208.04	102.215	102.212	0.00290031	0.480229	Q3/1992	0.4803	-0.7829	0.480229	7.0512e-05	-1.26313	1208.04
Q4/1992	1992-12-31	5991.06	702.369	799.8	1243.33	817.46	528.102	235625	413.753								Q4/1992	310.65	1243.33	1243.33	105.202	105.198	0.00408092	12.2064	Q4/1992	12.2064	16.5845	12.2064	-2.36763e-05	4.37808	1243.33
Q1/1993	1993-03-31	6013.83	709.68	788.032	1217.47	800.699	530.884	238984	409.398								Q1/1993	304.14	1217.47	1217.47	102.997	103.01	-0.0131967	-8.06123	Q1/1993	-8.0611	-10.3607	-8.06123	0.00012997	-2.29947	1217.47
Q2/1993	1993-06-30	6067.8	714.322	794.4	1218.2	800.396	532.814	237290	408.382								Q2/1993	304.36	1218.2	1218.2	103.072	103.072	4.87304e-05	0.238082	Q2/1993	0.2378	0.4585	0.238082	-0.000282018	0.220418	1218.2
Q3/1993	1993-09-30	6134.76	727.295	794.668	1228.75	796.736	536.296	237222	410.524								Q3/1993	307	1228.75	1228.75	103.966	103.965	0.000858546	3.51176	Q3/1993	3.5121	5.2673	3.51176	0.000344064	1.75554	1228.75
Q4/1993	1993-12-31	6189.1	732.855	798.032	1242.64	801.086	537.621	242339	409.36								Q4/1993	310.46	1242.64	1242.64	105.137	105.14	-0.00222022	4.59722	Q4/1993	4.597	2.0467	4.59722	-0.000219657	-2.55052	1242.64
Q1/1994	1994-03-31	6260.05	740.989	797.996	1245.82	801.061	546.381	242590	408.337								Q1/1994	311.26	1245.82	1245.82	105.408	105.409	-0.000444152	1.02789	Q1/1994	1.0281	3.3994	1.02789	0.000211675	2.37151	1245.82
Q2/1994	1994-06-30	6308.61	740.666	806.172	1241.48	810.536	547.222	243634	413.116								Q2/1994	310.18	1241.48	1241.48	105.043	105.042	0.000851377	-1.38556	Q2/1994	-1.3858	-4.3365	-1.38556	-0.000240323	-2.95094	1241.48
Q3/1994	1994-09-30	6357.47	748.209	809.136	1252.47	814.389	549.61	245853	416.011								Q3/1994	312.92	1252.47	1252.47	105.97	105.972	-0.00119448	3.58856	Q3/1994	3.5887	2.3163	3.58856	0.000143592	-1.27226	1252.47
Q4/1994	1994-12-31	6425.93	751.519	811.956	1260.43	821.498	556.041	245527	417.928								Q4/1994	314.91	1260.43	1260.43	106.644	106.645	-0.000352339	2.56488	Q4/1994	2.5647	6.6518	2.56488	-0.000180811	4.08692	1260.43
Q1/1995	1995-03-31	6442.94	753.227	815.032	1265.02	818.311	555.814	247133	414.052								Q1/1995	316.03	1265.02	1265.02	107.024	107.033	-0.00959277	1.46527	Q1/1995	1.4653	-0.659	1.46527	3.41017e-05	-2.12427	1265.02
Q2/1995	1995-06-30	6500.69	757.608	828.124	1280.93	821.383	560.093	250191	420.976								Q2/1995	320.04	1280.93	1280.93	108.382	108.379	0.00233563	5.12613	Q2/1995	5.126	5.2182	5.12613	-0.000127166	0.0920728	1280.93
Q3/1995	1995-09-30	6560.33	761.588	821.556	1280.06	828.641	566.201	251449	422.588								Q3/1995	319.82	1280.06	1280.06	108.307	108.306	0.00127398	-0.270778	Q3/1995	-0.2707	-0.6086	-0.270778	7.7887e-05	-0.337822	1280.06
Q4/1995	1995-12-31	6606.36	769.633	822.476	1278.47	828.393	566.412	253233	426.168								Q4/1995	319.43	1278.47	1278.47	108.175	108.171	0.00381475	-0.496238	Q4/1995	-0.4962	0.2184	-0.496238	3.76804e-05	0.714638	1278.47
Q1/1996	1996-03-31	6667.7	779.344	835.96	1283.97	833.716	574.115	253379	423.7								Q1/1996	320.8	1283.97	1283.97	108.639	108.636	0.00274952	1.73068	Q1/1996	1.7307	0.623	1.73068	2.45162e-05	-1.10768	1283.97
Q2/1996	1996-06-30	6740.08	783.594	833.732	1289.61	830.22	575.246	255917	432.012								Q2/1996	322.21	1289.61	1289.61	109.116	109.113	0.00304646	1.76867	Q2/1996	1.7688	2.1068	1.76867	0.000133018	0.338133	1289.61
Q3/1996	1996-09-30	6780.7	792.561	843.552	1293.37	831.093	577.676	255606	433.844								Q3/1996	323.15	1293.37	1293.37	109.435	109.432	0.00315982	1.17167	Q3/1996	1.1714	1.525	1.17167	-0.000270992	0.353329	1293.37
Q4/1996	1996-12-31	6833.96	801.187	835.432	1295.68	837.062	588.319	258007	435.608								Q4/1996	323.73	1295.68	1295.68	109.631	109.627	0.00378963	0.717574	Q4/1996	0.7175	-0.0863	0.717574	-7.43547e-05	-0.803874	1295.68
Q1/1997	1997-03-31	6906.06	813.304	833.148	1300.53	839.888	598.43	262298	438.896								Q1/1997	324.92	1300.53	1300.53	110.034	110.037	-0.0031516	1.50415	Q1/1997	1.5042	1.3886	1.50415	5.09049e-05	-0.115549	1300.53
Q2/1997	1997-06-30	6937.42	823.812	838.328	1306.75	859.726	603.607	255519	439.048								Q2/1997	326.47	1306.75	1306.75	110.559	110.564	-0.00443276	1.92653	Q2/1997	1.9266	2.1247	1.92653	7.1676e-05	0.198172	1306.75
Q3/1997	1997-09-30	7056.14	837.787	845.108	1295.32	867.673	611.511	256378	441.08								Q3/1997	323.62	1295.32	1295.32	109.594	109.597	-0.00283311	-3.45194	Q3/1997	-3.4519	-2.5011	-3.45194	3.91585e-05	0.950839	1295.32
Q4/1997	1997-12-31	7139.91	834.294	853.256	1308.19	874.065	615.694	255802	455.484								Q4/1997	326.83	1308.19	1308.19	110.681	110.686	-0.0048646	4.03457	Q4/1997	4.0346	2.697	4.03457	2.81129e-05	-1.33757	1308.19
Q1/1998	1998-03-31	7213.55	845.949	861.292	1314.23	878.998	616.081	255206	454.348								Q1/1998	328.35	1314.23	1314.23	111.196	111.197	-0.000990872	1.85903	Q1/1998	1.859	1.939	1.85903	-3.48559e-05	0.0799651	1314.23
Q2/1998	1998-06-30	7340.99	855.663	873.632	1307.29	885.965	623.64	255140	461.268								Q2/1998	326.58	1307.29	1307.29	110.596	110.609	-0.0130398	-2.09619	Q2/1998	-2.0962	-2.2793	-2.09619	-8.22536e-06	-0.183108	1307.29
Q3/1998	1998-09-30	7437.54	869.777	882.316	1318.13	893.008	627.201	256826	463.824								Q3/1998	329.33	1318.13	1318.13	111.528	111.527	0.000484665	3.36047	Q3/1998	3.3605	4.3957	3.36047	2.89998e-05	1.03523	1318.13
Q4/1998	1998-12-31	7546.84	866.976	888.776	1330.86	897.256	629.003	256777	473.944								Q4/1998	332.51	1330.86	1330.86	112.605	112.604	0.000562106	3.91842	Q4/1998	3.9185	3.8676	3.91842	7.77013e-05	-0.0508223	1330.86
Q1/1999	1999-03-31	7618.69	885.641	890.12	1346.05	898.705	638.238	257403	474.832								Q1/1999	336.3	1346.05	1346.05	113.888	113.889	-0.000839575	4.64298	Q1/1999	4.6429	2.8843	4.64298	-8.11343e-05	-1.75868	1346.05
Q2/1999	1999-06-30	7731.53	896.845	897.672	1343.59	908.524	644.654	258393	482.86								Q2/1999	335.69	1343.59	1343.59	113.681	113.681	0.000554937	-0.728437	Q2/1999	-0.7286	-0.416	-0.728437	-0.000163205	0.312437	1343.59
Q3/1999	1999-09-30	7819.27	904.75	915.956	1345.9	917.387	652.614	259918	490.46								Q3/1999	336.26	1345.9	1345.9	113.874	113.877	-0.00220176	0.690683	Q3/1999	0.6907	1.6789	0.690683	1.71182e-05	0.988217	1345.9
Q4/1999	1999-12-31	7934.14	914.619	924.388	1363.55	921.335	658.86	260113	495.788								Q4/1999	340.67	1363.55	1363.55	115.368	115.37	-0.00161145	5.34778	Q4/1999	5.3479	5.5966	5.34778	0.000116115	0.248816	1363.55
Q1/2000	2000-03-31	8054.86	932.446	931.684	1370.09	922.308	665.868	262771	503.388								Q1/2000	342.3	1370.09	1370.09	115.92	115.923	-0.00329881	1.93356	Q1/2000	1.9336	0.4617	1.93356	3.69254e-05	-1.47186	1370.09
Q2/2000	2000-06-30	8132.19	935.7	939.864	1384.84	930.48	671.633	261770	505.888								Q2/2000	345.98	1384.84	1384.84	117.166	117.171	-0.00531592	4.37723	Q2/2000	4.377	4.2406	4.37723	-0.000228484	-0.136628	1384.84
Q3/2000	2000-09-30	8211.28	946.12	944.728	1386	934.491	680.291	262245	512.068								Q3/2000	346.27	1386	1386	117.264	117.269	-0.00500102	0.334608	Q3/2000	0.3346	1.2616	0.334608	-8.30865e-06	0.926992	1386
Q4/2000	2000-12-31	8284.4	954.107	947.756	1376.89	941.659	681.882	265366	511.236								Q4/2000	344	1376.89	1376.89	116.496	116.498	-0.00277156	-2.6039	Q4/2000	-2.6038	-2.4405	-2.6039	0.000104476	0.163404	1376.89
Q1/2001	2001-03-31	8319.4	960.189	956.072	1402.49	943.234	687.427	266477	518.428								Q1/2001	350.43	1402.49	1402.49	118.673	118.664	0.00882039	7.64674	Q1/2001	7.6468	5.6305	7.64674	5.68811e-05	-2.01624	1402.49
Q2/2001	2001-06-30	8340.76	968.136	961.996	1404.37	939.535	688.659	268997	525.288								Q2/2001	350.86	1404.37	1404.37	118.819	118.823	-0.00462663	0.537269	Q2/2001	0.5373	1.0461	0.537269	3.09414e-05	0.508831	1404.37
Q3/2001	2001-09-30	8371.25	984.335	969.892	1406.54	934.624	690.476	268345	532.524								Q3/2001	351.37	1406.54	1406.54	118.991	119.007	-0.0155185	0.619506	Q3/2001	0.6193	0.16	0.619506	-0.00020564	-0.459506	1406.54
Q4/2001	2001-12-31	8499.13	994.334	971.952	1397.14	935.306	699.045	268308	532.072								Q4/2001	349.06	1397.14	1397.14	118.209	118.212	-0.0023828	-2.64683	Q4/2001	-2.6468	-2.4544	-2.64683	3.01179e-05	0.19243	1397.14
Q1/2002	2002-03-31	8524.58	1000.38	975.392	1388.46	937.539	709.688	269231	538.232								Q1/2002	346.89	1388.46	1388.46	117.474	117.477	-0.00300903	-2.46146	Q1/2002	-2.4613	-1.4495	-2.46146	0.000157145	1.01196	1388.46
Q2/2002	2002-06-30	8568.13	1011.63	981.392	1386.72	934.033	718.662	271593	540.404								Q2/2002	346.45	1386.72	1386.72	117.325	117.331	-0.00521694	-0.498899	Q2/2002	-0.4991	-0.5637	-0.498899	-0.000201391	-0.0648014	1386.72
Q3/2002	2002-09-30	8628.04	1020.09	988.884	1393.67	938.175	720.121	272326	544.948								Q3/2002	348.19	1393.67	1393.67	117.915	117.918	-0.00332752	2.0175	Q3/2002	2.0176	0.892	2.0175	9.62679e-05	-1.1255	1393.67
Q4/2002	2002-12-31	8674.35	1025.18	992.492	1401.04	944.52	727.484	271649	547.956								Q4/2002	350.03	1401.04	1401.04	118.538	118.542	-0.00429377	2.13387	Q4/2002	2.1339	2.4412	2.13387	2.76717e-05	0.307328	1401.04
Q1/2003	2003-03-31	8712.53	1031.94	994.916	1394.97	942.986	730.836	272023	546.724								Q1/2003	348.55	1394.97	1394.97	118.037	118.028	0.00850907	-1.72318	Q1/2003	-1.7231	0.0802	-1.72318	7.51117e-05	1.80338	1394.97
Q2/2003	2003-06-30	8809.51	1048.61	993.728	1394.82	944.666	736.841	272036	552.496								Q2/2003	348.48	1394.82	1394.82	118.013	118.016	-0.00301261	-0.0412849	Q2/2003	-0.0415	-0.799	-0.0412849	-0.000215094	-0.757715	1394.82
Q3/2003	2003-09-30	8939.39	1058.74	1003.56	1394.68	948.064	743.329	272097	558.22								Q3/2003	348.44	1394.68	1394.68	117.999	118.004	-0.00429018	-0.0415759	Q3/2003	-0.0415	-1.0398	-0.0415759	7.58533e-05	-0.998224	1394.68
Q4/2003	2003-12-31	9008.82	1059.36	1004.4	1393.67	948.939	744.214	275790	565.844								Q4/2003	348.15	1393.67	1393.67	117.901	117.918	-0.0168735	-0.28993	Q4/2003	-0.2901	0.6052	-0.28993	-0.000169551	0.89513	1393.67
Q1/2004	2004-03-31	9096.42	1071.79	1010.78	1401.87	953.166	753.621	275949	569.268								Q1/2004	350.25	1401.87	1401.87	118.612	118.612	-0.000101552	2.3764	Q1/2004	2.3766	0.6952	2.3764	0.000197358	-1.6812	1401.87
Q2/2004	2004-06-30	9155.47	1081.4	1015.14	1397.82	954.007	756.91	276119	576.064								Q2/2004	349.24	1397.82	1397.82	118.27	118.27	0.00044723	-1.15032	Q2/2004	-1.1505	-0.7602	-1.15032	-0.000184161	0.390116	1397.82
Q3/2004	2004-09-30	9243	1088.11	1017.13	1396.09	955.313	764.082	277837	581.076								Q3/2004	348.8	1396.09	1396.09	118.121	118.123	-0.00167607	-0.495847	Q3/2004	-0.4957	0.1206	-0.495847	0.000147457	0.616447	1396.09
Q4/2004	2004-12-31	9337.84	1095.21	1029.54	1405.49	960.931	770.47	276354	586.504								Q4/2004	351.15	1405.49	1405.49	118.917	118.918	-0.00126577	2.72086	Q4/2004	2.7208	1.5766	2.72086	-5.53926e-05	-1.14426	1405.49
Q1/2005	2005-03-31	9409.22	1107.52	1036.39	1406.5	957.637	781.447	277240	591.996								Q1/2005	351.4	1406.5	1406.5	119.002	119.004	-0.00231305	0.28861	Q1/2005	0.2885	-1.0864	0.28861	-0.000110071	-1.37501	1406.5
Q2/2005	2005-06-30	9511.45	1114.91	1040.49	1406.21	965.842	788.275	279048	599.452								Q2/2005	351.3	1406.21	1406.21	118.968	118.979	-0.0116412	-0.0824486	Q2/2005	-0.0822	0.886	-0.0824486	0.000248606	0.968449	1406.21
Q3/2005	2005-09-30	9585.23	1117.55	1046.4	1408.82	973.334	793.684	281722	603.24								Q3/2005	351.98	1408.82	1408.82	119.198	119.2	-0.00168324	0.742773	Q3/2005	0.7426	1.1262	0.742773	-0.000173351	0.383427	1408.82
Q4/2005	2005-12-31	9621.34	1127.63	1052.79	1410.26	975.008	801.287	281915	610.752								Q4/2005	352.34	1410.26	1410.26	119.32	119.322	-0.00211508	0.41119	Q4/2005	0.4113	-0.3191	0.41119	0.000109959	-0.73029	1410.26
Q1/2006	2006-03-31	9729.23	1125.32	1063.01	1420.57	978.337	812.438	282682	616.044								Q1/2006	354.95	1420.57	1420.57	120.204	120.194	0.00994153	2.95476	Q1/2006	2.9549	3.2774	2.95476	0.000135717	0.322636	1420.57
Q2/2006	2006-06-30	9781.02	1134.57	1068.11	1425.77	977.946	819.608	283032	622.084								Q2/2006	356.21	1425.77	1425.77	120.631	120.634	-0.00392297	1.47426	Q2/2006	1.4742	1.2749	1.47426	-5.71467e-05	-0.199357	1425.77
Q3/2006	2006-09-30	9838.11	1141.38	1068.68	1426.06	982.896	828.189	281134	625.612								Q3/2006	356.28	1426.06	1426.06	120.654	120.659	-0.00466971	0.0811035	Q3/2006	0.0812	-0.1185	0.0811035	9.65197e-05	-0.199603	1426.06
Q4/2006	2006-12-31	9938.41	1140.18	1074.78	1447.9	987.772	836.493	284660	633.048								Q4/2006	361.74	1447.9	1447.9	122.503	122.507	-0.00351983	6.26813	Q4/2006	6.2679	6.3534	6.26813	-0.000230922	0.0852691	1447.9
Q1/2007	2007-03-31	9990.66	1151.39	1082.81	1419.77	991.845	843.11	285179	636.912								Q1/2007	354.73	1419.77	1419.77	120.129	120.127	0.00270336	-7.54795	Q1/2007	-7.5478	-8.613	-7.54795	0.000152792	-1.06505	1419.77
Q2/2007	2007-06-30	10024.6	1158.69	1091.22	1432.06	995.486	855.633	286995	642.696								Q2/2007	357.8	1432.06	1432.06	121.169	121.167	0.00224997	3.50862	Q2/2007	3.5086	3.9189	3.50862	-1.67731e-05	0.410283	1432.06
Q3/2007	2007-09-30	10069.2	1173.97	1100.82	1434.81	993.3	863.444	284623	645.448								Q3/2007	358.49	1434.81	1434.81	121.403	121.399	0.0034106	0.769776	Q3/2007	0.7698	1.2282	0.769776	2.43852e-05	0.458424	1434.81
Q4/2007	2007-12-31	10081.8	1175.44	1103.95	1434.96	992.931	879.208	285299	653.22								Q4/2007	358.52	1434.96	1434.96	121.413	121.412	0.00130168	0.0404295	Q4/2007	0.0403	-0.1179	0.0404295	-0.000129542	-0.15833	1434.96
Q1/2008	2008-03-31	10061	1174.9	1099.56	1437.02	991.166	886.713	286639	655.028								Q1/2008	358.99	1437.02	1437.02	121.572	121.586	-0.0139137	0.575751	Q1/2008	0.5758	0.8285	0.575751	4.90855e-05	0.252749	1437.02
Q2/2008	2008-06-30	10077.9	1167.83	1100.78	1436.3	985.947	888.46	283146	645.576								Q2/2008	358.81	1436.3	1436.3	121.511	121.525	-0.0136978	-0.201098	Q2/2008	-0.2011	0.0785	-0.201098	-1.74133e-06	0.279598	1436.3
Q3/2008	2008-09-30	10005.1	1154.99	1099.04	1438.32	978.983	889.205	282123	632.532								Q3/2008	359.35	1438.32	1438.32	121.694	121.696	-0.00207714	0.564865	Q3/2008	0.5651	0.5505	0.564865	0.000234901	-0.0143651	1438.32
Q4/2008	2008-12-31	9884.72	1138.48	1096.14	1439.19	974.555	878.766	278587	628.284								Q4/2008	359.61	1439.19	1439.19	121.782	121.769	0.0125305	0.241612	Q4/2008	0.2415	-0.1567	0.241612	-0.000111506	-0.398312	1439.19
Q1/2009	2009-03-31	9850.83	1129.13	1095.19	1447.61	964.827	875.637	276834	623.624								Q1/2009	361.67	1447.61	1447.61	122.48	122.482	-0.00268848	2.36224	Q1/2009	2.3622	2.0941	2.36224	-4.17546e-05	-0.268142	1447.61
Q2/2009	2009-06-30	9806.38	1115.5	1100.42	1449.06	964.132	882.134	279910	613.048								Q2/2009	362.03	1449.06	1449.06	122.602	122.605	-0.00312032	0.400154	Q2/2009	0.4003	0.508	0.400154	0.00014636	0.107846	1449.06
Q3/2009	2009-09-30	9865.86	1121.64	1101.56	1432.43	967.359	890.434	281846	615.648								Q3/2009	357.91	1432.43	1432.43	121.206	121.197	0.00887271	-4.51268	Q3/2009	-4.5128	-3.08	-4.51268	-0.000120281	1.43268	1432.43
Q4/2009	2009-12-31	9864.81	1129.59	1110.75	1436.77	973.619	895.997	283926	616.504								Q4/2009	358.99	1436.77	1436.77	121.572	121.565	0.00749257	1.21717	Q4/2009	1.2171	1.2226	1.21717	-6.72156e-05	0.00543278	1436.77
Q1/2010	2010-03-31	9917.69	1119.98	1115.37	1435.68	973.576	906.035	284519	618.196								Q1/2010	358.67	1435.68	1435.68	121.464	121.473	-0.00907375	-0.301725	Q1/2010	-0.3015	0.7064	-0.301725	0.000225496	1.00813	1435.68
Q2/2010	2010-06-30	9998.39	1137.12	1118.58	1443.92	974.484	913.706	286824	621.408								Q2/2010	360.76	1443.92	1443.92	122.171	122.17	0.00118115	2.31675	Q2/2010	2.3166	3.0425	2.31675	-0.000150417	0.72575	1443.92
Q3/2010	2010-09-30	10063.1	1137.9	1123.54	1445.66	981.915	921.116	290925	617.74								Q3/2010	361.23	1445.66	1445.66	122.331	122.317	0.0135486	0.481502	Q3/2010	0.4816	1.2467	0.481502	9.83045e-05	0.765198	1445.66
Q4/2010	2010-12-31	10166.1	1129.9	1130.15	1456.36	986.816	929.92	287193	617.676								Q4/2010	363.87	1456.36	1456.36	123.225	123.223	0.00200534	2.99447	Q4/2010	2.9942	3.0496	2.99447	-0.000267697	0.0551323	1456.36
Q1/2011	2011-03-31	10217.1	1126.05	1136.53	1462.47	985.022	931.946	281470	610.056								Q1/2011	365.39	1462.47	1462.47	123.739	123.74	-0.000212844	1.68874	Q1/2011	1.689	5.0821	1.68874	0.000255481	3.39336	1462.47
Q2/2011	2011-06-30	10237.7	1119.12	1123.24	1453.51	985.51	936.344	284616	607.104								Q2/2011	363.11	1453.51	1453.51	122.967	122.981	-0.0136383	-2.4301	Q2/2011	-2.4301	-3.0715	-2.4301	-4.5996e-06	-0.641405	1453.51
Q3/2011	2011-09-30	10282.2	1119.87	1125.18	1470.72	980.4	940.433	288802	604.204								Q3/2011	367.45	1470.72	1470.72	124.437	124.437	-0.000117446	4.82121	Q3/2011	4.8211	5.6541	4.82121	-0.000105105	0.832895	1470.72
Q4/2011	2011-12-31	10316.8	1127.36	1121.87	1472.16	964.242	946.173	290131	595.4								Q4/2011	367.81	1472.16	1472.16	124.559	124.559	-0.000549289	0.393858	Q4/2011	0.3939	0.3772	0.393858	4.17848e-05	-0.0166582	1472.16
Q1/2012	2012-03-31	10379	1136.58	1126.05	1480.01	950.306	951.372	291372	592.8								Q1/2012	369.76	1480.01	1480.01	125.219	125.223	-0.00403067	2.14893	Q1/2012	2.1489	-0.0282	2.14893	-3.38656e-05	-2.17713	1480.01
Q2/2012	2012-06-30	10396.6	1139.86	1123.39	1483.34	943.995	952.879	292199	587.932								Q2/2012	370.52	1483.34	1483.34	125.477	125.505	-0.0281537	0.902221	Q2/2012	0.9021	0	0.902221	-0.000120872	-0.902221	1483.34
Q3/2012	2012-09-30	10424.1	1141.49	1122.7	1487.53	936.142	958.648	291829	581.84								Q3/2012	371.68	1487.53	1487.53	125.869	125.86	0.00982665	1.13577	Q3/2012	1.1358	1.134	1.13577	2.93739e-05	-0.00177063	1487.53
Q4/2012	2012-12-31	10453.2	1146.62	1124.93	1485.5	929.929	963.897	292852	569.192								Q4/2012	371.17	1485.5	1485.5	125.697	125.688	0.0084501	-0.543416	Q4/2012	-0.5434	0.2254	-0.543416	1.62959e-05	0.768816	1485.5
Q1/2013	2013-03-31	10502.3	1155.17	1126.53	1486.34	919.714	970.193	296529	564.108								Q1/2013	371.31	1486.34	1486.34	125.744	125.759	-0.0145343	0.22422	Q1/2013	0.2241	1.0828	0.22422	-0.000119993	0.85858	1486.34
Q2/2013	2013-06-30	10523.9	1155.06	1130.35	1496.17	915.049	978.629	299218	563.064								Q2/2013	373.74	1496.17	1496.17	126.567	126.591	-0.0236681	2.67289	Q2/2013	2.6731	2.4921	2.67289	0.000211019	-0.180789	1496.17
Q3/2013	2013-09-30	10573.1	1164.45	1129.13	1505.28	916.064	985.417	300245	564.264								Q3/2013	376.12	1505.28	1505.28	127.373	127.362	0.011354	2.45843	Q3/2013	2.4583	0.7831	2.45843	-0.000131748	-1.67533	1505.28
Q4/2013	2013-12-31	10662.2	1169.05	1137.38	1494.58	917.474	991.445	299931	567.752								Q4/2013	373.48	1494.58	1494.58	126.479	126.456	0.0228126	-2.81367	Q4/2013	-2.8138	-0.2965	-2.81367	-0.000132108	2.51717	1494.58
Q1/2014	2014-03-31	10713.4	1176.43	1131.34	1503.69	915.968	994.557	305958	567.94								Q1/2014	375.61	1503.69	1503.69	127.2	127.227	-0.0267433	2.4608	Q1/2014	2.461	1.8	2.4608	0.000201529	-0.660798	1503.69
Q2/2014	2014-06-30	10805.1	1179.82	1137.89	1504.85	917.694	1004.13	291862	572.18								Q2/2014	375.83	1504.85	1504.85	127.275	127.325	-0.0501339	0.308131	Q2/2014	0.3081	1.9	0.308131	-3.14042e-05	1.59187	1504.85
Q3/2014	2014-09-30	10909.9	1194.56	1143.62	1513.96	919.585	1011.37	293263	575.056								Q3/2014	378.29	1513.96	1513.96	128.108	128.096	0.0119802	2.44413	Q3/2014	2.444	2	2.44413	-0.000126091	-0.444126	1513.96
Q4/2014	2014-12-31	11045.2	1191.59	1146.52	1522.06	924.04	1018.42	294589	578.612								Q4/2014	380.42	1522.06	1522.06	128.829	128.781	0.0480496	2.15705	Q4/2014	2.1571	2	2.15705	4.93369e-05	-0.157051	1522.06
Q1/2015	2015-03-31	11145.3	1202.74	1151.05	1525.38	927.302	1020.1	296603	583.876								Q1/2015	381.03	1525.38	1525.38	129.036	129.063	-0.0267863	0.876948	Q1/2015	0.877	2	0.876948	5.16445e-05	1.12305	1525.38
Q2/2015	2015-06-30	11227.9	1210.91	1152.74	1529.58	934.308	1024.84	296047	587.52								Q2/2015	381.97	1529.58	1529.58	129.354	129.418	-0.0633091	1.10433	Q2/2015	1.1044	2	1.10433	6.80074e-05	0.895668	1529.58
Q3/2015	2015-09-30	11304.6	1222.33	1157.7	1538.84	941.096	1032.14	297275	594.412								Q3/2015	384.47	1538.84	1538.84	130.201	130.201	0.000167191	2.4426	Q3/2015	2.4426	2.1	2.4426	4.68809e-06	-0.342595	1538.84
Q4/2015	2015-12-31	11379.3	1227.74	1160.26	1547.8	944.4	1038.57	295364	597.124								Q4/2015	386.92	1547.8	1547.8	131.031	130.959	0.0711632	2.35131	Q4/2015	2.3513	2.1	2.35131	-6.7504e-06	-0.251307	1547.8
Q1/2016	2016-03-31	11430.5	1236.36	1175.46	1556.77	946.107	1042.55	296502	602.908								Q1/2016	388.84	1556.77	1556.77	131.681	131.718	-0.0373254	2.33757	Q1/2016	2.3376
Q2/2016	2016-06-30	11537.7	1249.04	1179.27	1559.23	948.32	1047.63	295643	606.576								Q2/2016	389.24	1559.23	1559.23	131.816	131.926	-0.109921	0.63332	Q2/2016	0.6332
Q3/2016	2016-09-30	11618.1	1259.06	1177.23	1565.16	951.127	1055.45	296875	611.208								Q3/2016	391.04	1565.16	1565.16	132.426	132.428	-0.00208739	1.52997	Q3/2016	1.5299
Q4/2016	2016-12-31	11702.1	1262.48	1185.7	1574.99	954.332	1064.27	297004	613.548								Q4/2016	393.93	1574.99	1574.99	133.404	133.26	0.144558	2.53701	Q4/2016	2.5372
Q1/2017	2017-03-31	11758	1267.27	1188.01	1587.68	959.752	1072.9	298553	616.272								Q1/2017	396.03	1587.68	1587.68	134.116	134.334	-0.218145	3.26255	Q1/2017	3.2623
Q2/2017	2017-06-30	11853	1270.6	1191.8	1602	961.036	1085.07	300729	621.272								Q2/2017	399.07	1602	1602	135.145	135.545	-0.400009	3.6561	Q2/2017	3.6563
Q3/2017	2017-09-30	11916.6	1274.32	1198.03	1598.82	964.982	1094.95	298757	625.608								Q3/2017	399.25	1598.82	1598.82	135.206	135.276	-0.0699077	-0.791894	Q3/2017	-0.7921
Q4/2017	2017-12-31	12035.2	1277.52	1200.72	1598.96	965.768	1100.69	299463	629.092								Q4/2017	399.5	1598.96	1598.96	135.291	135.288	0.00257103	0.0360314	Q4/2017	0.0362
Q1/2018	2018-03-31	12066.8	1279.91	1202.61	1603.76	968.568	1106.42	299459	632.615								Q1/2018	401.27	1603.76	1603.76	135.89	135.694	0.196108	1.20544	Q1/2018	1.2054
Q2/2018	2018-06-30	12150.4	1284.39	1205.31	1609.74	970.74	1111.92	300901	636.031								Q2/2018		1609.74	1609.74		136.2		1.50011	Q2/2018	1.5
Q3/2018	2018-09-30	12222.7	1288.63	1210.37	1616.14	972.917	1117.16	302172	639.338								Q3/2018		1616.14	1616.14		136.742		1.60008	Q3/2018	1.6
Q4/2018	2018-12-31	12292.4	1290.95	1215.36	1622.57	975.099	1122.15	302887	642.354								Q4/2018		1622.57	1622.57		137.285		1.59996	Q4/2018	1.6
Q1/2019	2019-03-31	12359.4	1292.5	1220.2	1629.02	976.072	1127.17	303415	645.067								Q1/2019		1629.02	1629.02		137.831		1.59983	Q1/2019	1.6
Q2/2019	2019-06-30	12423.8	1294.05	1224.96	1635.5	977.047	1132.21	303915	647.695								Q2/2019		1635.5	1635.5		138.379		1.60016	Q2/2019	1.6
Q3/2019	2019-09-30	12487	1295.61	1229.74	1641.6	978.023	1137.27	306762	650.286								Q3/2019		1641.6	1641.6		138.895		1.50002	Q3/2019	1.5
Q4/2019	2019-12-31	12549	1297.16	1234.54	1647.31	978.999	1142.35	302566	652.775								Q4/2019		1647.31	1647.31		139.379		1.39984	Q4/2019	1.4

## Sheet: I
Q1/1960 !Q mag=bil	.excel_last	Q111isc@OUTLOOK	Q112ISC@OUTLOOK	Q132isc@OUTLOOK	Q134ISC@OUTLOOK	Q136isc@OUTLOOK	Q156isc@OUTLOOK	Q158isc@OUTLOOK	Q184isc@OUTLOOK					S134NFBC@G10	(J112GCFT@EUDATA) - historical
.DESC		United States: Gross Capital Formation, Total, Volume(SAAR,Bil.Chn.2009.US$)	United Kingdom: Gross Capital Formation, Total, Volume(SAAR,Bil.Chn.2015.Pound)	France: Gross Capital Formation, Total, Volume(SAAR,Bil.Chn.2010.Euro)	Germany: Gross Capital Formation, Total, Volume(SAAR,Bil.Chn.2010.Euro)	Italy: Gross Capital Formation, Total, Volume(SAAR,Bil.Ch.2010.Euro)	Canada: Gross Capital Formation, Total, Volume(SAAR,Bil.Chn.2007.C$)	Japan: Gross Capital Formation, Total, Volume(SAAR,Bil.Chn.2011.Yen)	Spain: Gross Capital Formation, Total, Volume(SAAR,Bil.Chn.2010.Euro)					Germany: GDP: Gross Capital Formation (SWDA, Bil.Chained.2010.Euros)	UK: Gross Capital Formation (SWDA, Bil.Ch.05.GBP)
.T1		Q1-1960	Q1-1960	Q1-1960	Q1-1991	Q1-1960	Q1-1961	Q1-1960	Q1-1960					Q1-1991	Q1-1963
.TN		Q4-2019	Q4-2019	Q4-2019	Q4-2019	Q4-2019	Q4-2019	Q4-2019	Q4-2019					Q1-2018	Q4-2013
.LSOURCE		Organization for Economic Cooperation & Development	Organization for Economic Cooperation & Development	Organization for Economic Cooperation & Development	Organization for Economic Cooperation & Development	Organization for Economic Cooperation & Development	Organization for Economic Cooperation & Development	Organization for Economic Cooperation & Development	Organization for Economic Cooperation & Development					Deutsche Bundesbank	Statistical Office of the European Communities
.DTLM		May-30-2018 07:53	May-30-2018 07:53	May-30-2018 07:53	May-30-2018 07:53	May-30-2018 07:53	May-30-2018 07:53	May-30-2018 07:53	May-30-2018 07:53					May-24-2018 01:20	Mar-31-2014 18:46
Q1/1960	1960-03-31	482.693	72.9127	97.8849	#N/A	99.0559	#N/A	12723	29.8225					#N/A	#N/A
Q2/1960	1960-06-30	428.8	72.314	104.384	#N/A	99.9882	#N/A	12784	31.0933					#N/A	#N/A
Q3/1960	1960-09-30	429.866	75.7264	109.34	#N/A	103.304	#N/A	13736	32.6514					#N/A	#N/A
Q4/1960	1960-12-31	370.19	76.9272	109.04	#N/A	99.6474	#N/A	14801	34.7151					#N/A	#N/A
Q1/1961	1961-03-31	403.115	77.014	107.445	#N/A	108.333	55.1376	15876	37.2843					#N/A	#N/A
Q2/1961	1961-06-30	419.032	77.6543	106.981	#N/A	112.52	56.9329	16362	39.6129					#N/A	#N/A
Q3/1961	1961-09-30	461.887	73.0817	107.354	#N/A	116.645	53.9106	17131	41.7011					#N/A	#N/A
Q4/1961	1961-12-31	476.466	71.9704	111.77	#N/A	119.393	59.8663	18960	43.7087					#N/A	#N/A
Q1/1962	1962-03-31	500.709	71.2021	112.722	#N/A	124.279	61.6876	18545	45.6357					#N/A	#N/A
Q2/1962	1962-06-30	492.836	70.2878	112.879	#N/A	124.67	58.82	18434	47.2686					#N/A	#N/A
Q3/1962	1962-09-30	497.675	74.2433	117.915	#N/A	121.42	65.6672	18590	48.6074					#N/A	#N/A
Q4/1962	1962-12-31	480.708	69.0589	119.343	#N/A	122.703	63.6131	18669	49.6174					#N/A	#N/A
Q1/1963	1963-03-31	501.431	63.8896	110.295	#N/A	116.163	63.6637	19033	50.2984					#N/A	7.8737
Q2/1963	1963-06-30	516.103	75.7182	123.275	#N/A	126.977	63.7076	19967	51.073					#N/A	10.9255
Q3/1963	1963-09-30	533.353	76.1996	132.441	#N/A	133.045	65.8343	21127	51.9413					#N/A	11.1949
Q4/1963	1963-12-31	536.061	83.5118	128.815	#N/A	136.904	69.4605	23217	52.8005					#N/A	12.9862
Q1/1964	1964-03-31	563.131	84.4121	133.649	#N/A	137.197	73.5305	23872	53.6505					#N/A	13.7229
Q2/1964	1964-06-30	563.006	90.3888	139.225	#N/A	123.531	70.8902	24033	54.6853					#N/A	15.0478
Q3/1964	1964-09-30	578.58	91.1134	139.751	#N/A	114.935	71.79	24456	55.9047					#N/A	15.2139
Q4/1964	1964-12-31	590.917	93.6192	141.252	#N/A	107.684	73.2279	24869	57.2926					#N/A	15.894
Q1/1965	1965-03-31	641.313	93.3027	142.308	#N/A	112.111	84.4682	24592	58.8488					#N/A	15.8764
Q2/1965	1965-06-30	650.107	87.817	143.293	#N/A	116.385	82.703	25266	60.4776					#N/A	14.3412
Q3/1965	1965-09-30	668.924	89.744	144.63	#N/A	118.516	83.0166	25749	62.1788					#N/A	15.1627
Q4/1965	1965-12-31	665.813	90.7067	151.337	#N/A	120.319	86.621	25760	64.1134					#N/A	15.5434
Q1/1966	1966-03-31	732.442	89.6617	153.823	#N/A	120.837	90.7115	26041	66.2814					#N/A	15.5752
Q2/1966	1966-06-30	705.861	86.9455	155.922	#N/A	120.308	97.2108	29003	67.8133					#N/A	14.8535
Q3/1966	1966-09-30	701.274	90.1558	161.058	#N/A	130.744	90.4499	30144	68.7094					#N/A	15.7527
Q4/1966	1966-12-31	712.797	82.9262	160.272	#N/A	125.561	91.3921	30066	68.9042					#N/A	13.6098
Q1/1967	1967-03-31	685	86.5083	164.047	#N/A	129.174	87.318	31842	68.3978					#N/A	14.6707
Q2/1967	1967-06-30	647.539	90.7368	164.906	#N/A	138.997	86.1389	33269	68.451					#N/A	15.856
Q3/1967	1967-09-30	668.448	87.8339	167.73	#N/A	142.482	87.6549	35448	69.0639					#N/A	14.8959
Q4/1967	1967-12-31	682.172	90.9072	169.96	#N/A	145.427	83.2878	37485	69.9836					#N/A	15.5566
Q1/1968	1968-03-31	685.292	93.5797	185.151	#N/A	136.542	85.0625	38999	71.2101					#N/A	15.4692
Q2/1968	1968-06-30	719.037	101.165	153.68	#N/A	143.766	87.8781	40236	72.9997					#N/A	17.3232
Q3/1968	1968-09-30	698.672	103.518	181.632	#N/A	154.513	89.227	41189	75.3523					#N/A	17.7269
Q4/1968	1968-12-31	697.135	104.93	183.495	#N/A	161.761	92.3781	46421	78.5884					#N/A	18.1747
Q1/1969	1969-03-31	743.963	105.68	190.592	#N/A	166.713	93.9201	45262	82.708					#N/A	18.8557
Q2/1969	1969-06-30	735.248	105.18	195.069	#N/A	171.444	95.8455	46848	85.5321					#N/A	18.8398
Q3/1969	1969-09-30	749.198	105.361	196.119	#N/A	171.91	97.5764	49795	87.0608					#N/A	18.9281
Q4/1969	1969-12-31	691.904	105.321	204.566	#N/A	152.971	99.3033	53092	87.4187					#N/A	18.9679
Q1/1970	1970-03-31	679.425	100.551	204.715	#N/A	170.785	93.8132	56472	87.5745					#N/A	17.4513
Q2/1970	1970-06-30	683.902	107.281	210.385	#N/A	173.425	90.9621	58116	86.3257					#N/A	19.2426
Q3/1970	1970-09-30	698.597	109.682	214.933	#N/A	186.124	94.8499	59208	85.303					#N/A	19.777
Q4/1970	1970-12-31	656.251	111.191	211.392	#N/A	179.305	87.155	58705	84.5202					#N/A	19.7664
Q1/1971	1971-03-31	726.296	109.706	214.928	#N/A	169.677	87.685	58837	81.7629					#N/A	18.9652
Q2/1971	1971-06-30	748.277	108.105	215.241	#N/A	163.166	92.5082	58714	82.9311					#N/A	17.6756
Q3/1971	1971-09-30	763.073	109.773	218.942	#N/A	168.056	98.52	58471	84.2775					#N/A	17.5219
Q4/1971	1971-12-31	723.855	111.58	219.594	#N/A	162.357	101.998	58702	86.9871					#N/A	17.7852
Q1/1972	1972-03-31	780.647	108.635	224.618	#N/A	164.363	97.8558	63014	90.1979					#N/A	17.0759
Q2/1972	1972-06-30	827.443	115.027	225.722	#N/A	166.073	101.882	62978	94.8736					#N/A	18.6411
Q3/1972	1972-09-30	837.42	114.218	227.193	#N/A	174.795	102.908	64974	98.3539					#N/A	18.483
Q4/1972	1972-12-31	857.047	114.389	235.55	#N/A	173.004	100.87	66588	101.11					#N/A	18.5598
Q1/1973	1973-03-31	927.447	128.675	238.019	#N/A	174.02	107.382	71360	103.733					#N/A	22.365
Q2/1973	1973-06-30	970.816	129.345	245.279	#N/A	180.028	108.729	74090	106.421					#N/A	23.0072
Q3/1973	1973-09-30	926.706	120.222	257.561	#N/A	198.12	116.184	72068	108.703					#N/A	20.8917
Q4/1973	1973-12-31	974.201	120.904	252.393	#N/A	215.692	121.429	70656	112.054					#N/A	21.5718
Q1/1974	1974-03-31	921.918	108.5	264.065	#N/A	218.149	124.138	71279	116.404					#N/A	18.6764
Q2/1974	1974-06-30	930.446	112.142	264.183	#N/A	216.354	127.078	67759	119.362					#N/A	20.2451
Q3/1974	1974-09-30	860.725	109.614	268.216	#N/A	214.141	122.562	66405	119.955					#N/A	19.9634
Q4/1974	1974-12-31	869.324	99.8764	242.751	#N/A	193.933	129.998	64709	118.25					#N/A	17.7233
Q1/1975	1975-03-31	730.265	93.4633	230.395	#N/A	169.767	127.285	61225	115.268					#N/A	15.9603
Q2/1975	1975-06-30	688.457	85.6807	222.541	#N/A	170.506	123.483	63929	113.1					#N/A	14.0524
Q3/1975	1975-09-30	752.83	90.2411	213.256	#N/A	176.827	125.14	65237	112.425					#N/A	15.6794
Q4/1975	1975-12-31	792.054	91.0445	223.36	#N/A	176.469	126.897	65471	111.521					#N/A	15.7721
Q1/1976	1976-03-31	874.467	95.5342	229.018	#N/A	182.849	134.321	66518	111.314					#N/A	16.8895
Q2/1976	1976-06-30	890.937	94.0943	237.654	#N/A	190.521	136.341	66203	112.302					#N/A	15.6582
Q3/1976	1976-09-30	891.048	99.3461	243.137	#N/A	196.301	135.058	67157	112.535					#N/A	16.5848
Q4/1976	1976-12-31	888.244	108.942	240.578	#N/A	209.185	130.64	65509	111.663					#N/A	18.8751
Q1/1977	1977-03-31	928.105	115.081	248.227	#N/A	201.19	135.062	67929	110.722					#N/A	20.761
Q2/1977	1977-06-30	1010.49	111.555	246.003	#N/A	187.62	135.734	67534	108.309					#N/A	20.2398
Q3/1977	1977-09-30	1064.51	107.425	241.635	#N/A	172.026	134.038	67933	106.288					#N/A	19.0006
Q4/1977	1977-12-31	1018.18	114.22	242.164	#N/A	169.684	133.426	69833	105.812					#N/A	20.3971
Q1/1978	1978-03-31	1028.62	115.614	245.354	#N/A	172.488	129.801	70737	104.723					#N/A	20.2681
Q2/1978	1978-06-30	1150.66	119.587	244.791	#N/A	185.339	132.781	73122	102.478					#N/A	20.8979
Q3/1978	1978-09-30	1194.72	119.716	246.463	#N/A	187.997	136.29	74182	100.629					#N/A	20.3829
Q4/1978	1978-12-31	1236.49	121.534	249.469	#N/A	204.404	141.676	75962	99.6633					#N/A	20.2822
Q1/1979	1979-03-31	1219.36	128.033	253.083	#N/A	188.826	144.425	77080	98.6414					#N/A	22.0259
Q2/1979	1979-06-30	1228.49	123.414	254.383	#N/A	202.426	156.047	78022	98.8979					#N/A	19.9802
Q3/1979	1979-09-30	1235.43	128.643	265.677	#N/A	200.806	154.411	78661	99.8628					#N/A	21.624
Q4/1979	1979-12-31	1216.01	129.905	263.105	#N/A	214.407	160.116	78431	101.22					#N/A	21.7653
Q1/1980	1980-03-31	1219.02	117.934	270.363	#N/A	214.737	152.154	76034	104.674					#N/A	18.5271
Q2/1980	1980-06-30	1117.37	116.22	266.949	#N/A	218.737	153.825	76002	101.087					#N/A	18.5413
Q3/1980	1980-09-30	1045.99	105.446	266.991	#N/A	222.517	140.174	77698	102.744					#N/A	15.0929
Q4/1980	1980-12-31	1141.06	103.181	257.245	#N/A	217.647	148.278	79212	100.49					#N/A	14.2423
Q1/1981	1981-03-31	1255.73	94.3749	253.112	#N/A	211.142	163.587	80073	95.8382					#N/A	11.8688
Q2/1981	1981-06-30	1187.58	96.3688	239.636	#N/A	203.214	176.975	80856	95.5978					#N/A	12.3732
Q3/1981	1981-09-30	1251.37	106.069	241.476	#N/A	184.585	165.153	78057	91.0307					#N/A	15.3534
Q4/1981	1981-12-31	1201.28	106.28	247.936	#N/A	198.922	152.299	79044	91.3166					#N/A	15.6759
Q1/1982	1982-03-31	1054.16	113.113	251.136	#N/A	204.736	144.371	81028	91.9012					#N/A	16.4805
Q2/1982	1982-06-30	1067.43	117.26	260.272	#N/A	194.714	127.481	78838	97.6183					#N/A	18.1155
Q3/1982	1982-09-30	1027.85	108.866	256.916	#N/A	198.443	118.366	79570	95.0326					#N/A	16.3807
Q4/1982	1982-12-31	938.497	106.053	242.6	#N/A	184.166	121.976	78348	94.6883					#N/A	15.1794
Q1/1983	1983-03-31	975.049	117.239	247.612	#N/A	182.075	132.387	76833	94.6688					#N/A	18.0696
Q2/1983	1983-06-30	1063.26	121.988	235.796	#N/A	181.865	132.567	76778	92.4275					#N/A	18.1455
Q3/1983	1983-09-30	1132.12	119.968	235.46	#N/A	188.887	142.249	76953	90.4655					#N/A	18.3734
Q4/1983	1983-12-31	1260.45	132.444	233.232	#N/A	204.82	146.547	79325	93.3045					#N/A	20.42
Q1/1984	1984-03-31	1390.92	128.858	241.12	#N/A	202.637	152.099	79982	89.8678					#N/A	20.3441
Q2/1984	1984-06-30	1436.51	133.983	237.94	#N/A	204.708	156.986	81518	87.7369					#N/A	20.7901
Q3/1984	1984-09-30	1470.53	132.291	233.684	#N/A	214.052	153.669	83226	91.7843					#N/A	20.8679
Q4/1984	1984-12-31	1455.82	137.289	241.48	#N/A	210.886	151.249	81974	95.0456					#N/A	21.7467
Q1/1985	1985-03-31	1416.49	138.78	237.332	#N/A	212.016	158.462	87361	94.6493					#N/A	21.6664
Q2/1985	1985-06-30	1447.85	142.102	238.656	#N/A	215.554	163.949	88497	97.1115					#N/A	23.5054
Q3/1985	1985-09-30	1438.1	132.497	252.464	#N/A	214.474	172.596	91421	94.8247					#N/A	21.6284
Q4/1985	1985-12-31	1480.47	137.998	248.128	#N/A	217.877	171.861	91673	96.5983					#N/A	21.8775
Q1/1986	1986-03-31	1482.25	129.012	252.708	#N/A	217.254	176.503	94662	100.808					#N/A	20.4094
Q2/1986	1986-06-30	1449.7	140.129	261.764	#N/A	220.6	174.295	94170	111.58					#N/A	22.2202
Q3/1986	1986-09-30	1420.42	145.222	266.716	#N/A	226.893	167.428	94345	110.566					#N/A	23.4639
Q4/1986	1986-12-31	1419.23	150.22	261.216	#N/A	231.89	165.336	94366	106.512					#N/A	25.4213
Q1/1987	1987-03-31	1471.3	140.483	269.764	#N/A	230.287	171.183	92484	113.483					#N/A	23.3738
Q2/1987	1987-06-30	1484.62	153.071	273.332	#N/A	245.688	176.774	98449	113.743					#N/A	25.2243
Q3/1987	1987-09-30	1495.91	160.624	274.576	#N/A	229.872	188.362	102836	123.683					#N/A	27.2612
Q4/1987	1987-12-31	1589.92	165.077	277.444	#N/A	246.093	201.865	108874	133.928					#N/A	27.9033
Q1/1988	1988-03-31	1508.58	171.175	292.512	#N/A	248.193	203.523	115423	130.504					#N/A	29.0843
Q2/1988	1988-06-30	1563.91	175.718	295.588	#N/A	244.434	200.845	111730	137.858					#N/A	30.0427
Q3/1988	1988-09-30	1573.44	184.09	304.06	#N/A	254.167	207.689	118477	145.531					#N/A	31.3791
Q4/1988	1988-12-31	1594.31	199.761	310.852	#N/A	261.541	203.651	119660	142.906					#N/A	33.8364
Q1/1989	1989-03-31	1658.47	192.42	316.18	#N/A	269.674	207.883	125775	152.742					#N/A	33.0043
Q2/1989	1989-06-30	1651.66	194.345	326.744	#N/A	260.573	216.558	123497	152.118					#N/A	33.3082
Q3/1989	1989-09-30	1646.04	192.96	328.88	#N/A	258.702	218.062	125974	158.57					#N/A	32.5609
Q4/1989	1989-12-31	1631.55	178.934	334.588	#N/A	265.859	212.11	132912	157.628					#N/A	30.1787
Q1/1990	1990-03-31	1660.04	187.644	340.604	#N/A	282.489	208.885	130809	162.214					#N/A	32.1944
Q2/1990	1990-06-30	1663.86	189.802	347.332	#N/A	268.906	204.702	134779	166.08					#N/A	32.379
Q3/1990	1990-09-30	1634.18	178.045	341.908	#N/A	271.107	191.795	139390	155.451					#N/A	30.2723
Q4/1990	1990-12-31	1557.53	167.42	333.228	#N/A	271.141	185.636	140392	176.162					#N/A	28.4501
Q1/1991	1991-03-31	1497.95	168.79	334.052	499.423	283.256	189.878	140210	164.813					124.33	29.3687
Q2/1991	1991-06-30	1498.52	157.953	329.932	505.347	281.975	174.35	141683	171.128					125.84	27.4325
Q3/1991	1991-09-30	1527.91	153.499	330.356	499.777	270.652	181.187	140590	167.697					124.4	26.74
Q4/1991	1991-12-31	1573.13	165.458	323.828	493.954	277.639	182.949	139172	165.716					122.97	28.829
Q1/1992	1992-03-31	1555.01	169.535	336.744	511.392	284.038	181.533	135058	165.17					127.4	30.0418
Q2/1992	1992-06-30	1629.47	162.998	326.044	508.861	271.462	176.117	137341	158.979					126.76	28.8361
Q3/1992	1992-09-30	1637.75	163.696	316.212	483.552	271.932	179.192	136238	164.845					120.42	29.0233
Q4/1992	1992-12-31	1674.98	163.638	303.696	474.188	259.558	167.138	132737	155.932					118.09	29.0472
Q1/1993	1993-03-31	1699.23	166.896	294.732	450.975	253.311	171.71	133962	144.524					112.28	29.9278
Q2/1993	1993-06-30	1714.78	171.535	287.112	464.599	243.37	178.263	132974	140.515					115.65	30.7687
Q3/1993	1993-09-30	1708.79	167.859	288.644	474.83	235.382	188.04	129543	142.231					118.18	30.3218
Q4/1993	1993-12-31	1783.53	166.473	284.584	456.85	232.422	189.391	128326	143.16					113.71	30.3333
Q1/1994	1994-03-31	1831.61	170.646	299.972	460.672	249.631	193.911	129994	144.134					114.68	30.9463
Q2/1994	1994-06-30	1926.89	185.09	306.348	467.762	253.649	199.597	126136	147.175					116.44	33.6871
Q3/1994	1994-09-30	1911.92	182.313	314.404	484.372	252.678	198.546	129306	151.495					120.58	33.5688
Q4/1994	1994-12-31	1979.67	192.801	318.668	505.59	266.351	201.458	127554	147.428					125.86	35.7337
Q1/1995	1995-03-31	1990.5	176.375	321.324	483.194	271.23	199.619	129785	157.968					120.3	32.9063
Q2/1995	1995-06-30	1959.8	198.449	314.256	487.094	267.476	202.433	132329	157.26					121.24	35.8044
Q3/1995	1995-09-30	1944.2	194.136	326.56	489.221	276.583	200.143	136808	159.12					121.77	36.2293
Q4/1995	1995-12-31	1983.4	186.843	322.468	480.814	296.104	198.082	137734	160.684					119.68	35.8344
Q1/1996	1996-03-31	2012.6	191.653	313.58	456.7	282.068	195.949	141173	162.808					113.71	37.3546
Q2/1996	1996-06-30	2098.4	191.481	315.68	476.346	268.899	187.644	144935	161.74					118.6	36.8635
Q3/1996	1996-09-30	2181.5	191.677	307.568	473.763	274.488	203.762	143430	162.048					117.95	36.8273
Q4/1996	1996-12-31	2185.8	192.662	308.748	477.966	272.463	220.101	143928	161.988					119.01	36.5596
Q1/1997	1997-03-31	2227.8	197.935	307.66	466.575	276.983	219.5	140479	166.32					116.18	38.4772
Q2/1997	1997-06-30	2326.7	203.303	315.42	476.296	276.683	229.715	140580	169.844					118.61	41.3418
Q3/1997	1997-09-30	2362.4	202.666	322.068	484.295	279.402	238.688	142023	169.932					120.59	41.3294
Q4/1997	1997-12-31	2383.2	207.157	331.336	490.573	301.136	241.588	140499	175.116					122.15	43.1534
Q1/1998	1998-03-31	2469.7	212.775	346.536	500.853	290.292	244.269	136675	182.248					124.7	43.6657
Q2/1998	1998-06-30	2469.7	220.59	348.728	500.296	287.845	236.487	133419	183.964					124.6	46.3942
Q3/1998	1998-09-30	2541.1	215.02	353.056	506.473	290.576	226.072	132062	193.596					126.1	45.927
Q4/1998	1998-12-31	2599.1	230.683	360.812	500.6	294.411	236.848	135392	199.688					124.65	47.3014
Q1/1999	1999-03-31	2664.06	231.984	370.068	518.589	305.867	236.745	128196	202.36					129.12	49.1139
Q2/1999	1999-06-30	2673.17	210.436	377.108	514.538	297.41	245.842	129054	208.288					128.11	43.8336
Q3/1999	1999-09-30	2735.56	224.763	369.688	534.385	302.039	246.33	127934	212.312					133.06	46.6212
Q4/1999	1999-12-31	2813.71	238.844	386.092	534.233	311.333	262.695	127498	216.924					133.03	47.3402
Q1/2000	2000-03-31	2795.3	230.909	397.812	533.738	317.372	265.634	129974	219.816					132.84	47.9497
Q2/2000	2000-06-30	2928.81	232.341	403.8	540.373	329.211	266.427	131401	223.016					134.5	48.1228
Q3/2000	2000-09-30	2901.86	228.629	414.836	545.235	325.518	269.997	130781	226.356					135.7	48.8418
Q4/2000	2000-12-31	2906.03	221.358	424.96	549.743	336.402	266.536	133780	228.612					136.82	46.4172
Q1/2001	2001-03-31	2799.65	224.53	414.544	538.865	329.646	261.485	137166	230.544					134.14	46.6133
Q2/2001	2001-06-30	2814.1	241.877	421.028	538.308	330.291	266.323	131552	234.612					134.05	49.454
Q3/2001	2001-09-30	2754.77	236.889	407.428	515.779	337.374	264.184	126137	236.064					128.47	48.3357
Q4/2001	2001-12-31	2663.16	222.574	409.588	506.869	326.096	248.455	123354	237.012					126.21	45.1232
Q1/2002	2002-03-31	2750.68	232.014	415	487.753	334.322	247.101	121044	239.644					121.42	47.5849
Q2/2002	2002-06-30	2777.53	229.326	404.824	486.942	342.567	267.696	119787	243.792					121.22	46.0082
Q3/2002	2002-09-30	2785.88	229.354	402.472	480.257	345.845	271.448	121310	245.296					119.54	47.3394
Q4/2002	2002-12-31	2786.37	242.426	398.068	466.685	355.733	276.561	122326	250.38					116.16	48.8145
Q1/2003	2003-03-31	2805.79	235.664	408.996	488.004	356.187	286.578	120462	256.548					121.48	48.4382
Q2/2003	2003-06-30	2823.11	233.406	404.924	483.65	354.142	289.267	121772	257.956					120.42	47.1777
Q3/2003	2003-09-30	2915.41	235.71	402.748	474.587	332.704	283.76	122401	262.568					118.17	50.2798
Q4/2003	2003-12-31	2997.52	245.777	411.7	486.029	348.124	294.338	121911	265.924					121.05	52.6842
Q1/2004	2004-03-31	2999.31	238.064	421.952	460.953	355.15	295.508	123835	268.1					114.78	53.5595
Q2/2004	2004-06-30	3094.35	236.71	429.448	452.953	350.777	297.941	122571	272.776					112.77	52.8105
Q3/2004	2004-09-30	3132.19	243.526	438.108	477.966	348.582	322.091	123682	276.512					119.01	51.8203
Q4/2004	2004-12-31	3177.56	235.152	436.64	470.118	355.294	335.662	124579	281.32					117.05	52.6824
Q1/2005	2005-03-31	3250.14	235.851	441.944	431.914	349.14	343.067	125635	285.26					107.53	53.9508
Q2/2005	2005-06-30	3221.33	237.06	440.756	461.89	356.71	340.867	126240	293.548					115.03	53.7432
Q3/2005	2005-09-30	3252.01	247.682	439.544	463.915	354.096	352.336	128167	297.412					115.5	55.3447
Q4/2005	2005-12-31	3335.77	253.273	454.26	488.524	357.098	355.949	126209	300.176					121.63	55.6883
Q1/2006	2006-03-31	3376.71	258.669	448.584	490.118	364.718	369.315	125651	309.572					121.97	58.0449
Q2/2006	2006-06-30	3370.99	252.235	459.444	509.158	369.268	373.065	126348	314.484					126.75	55.6167
Q3/2006	2006-09-30	3339.19	251.066	465.216	517.513	378.201	368.5	125924	318.916					128.83	57.2473
Q4/2006	2006-12-31	3275.41	256.194	476.908	498.878	388.062	359.194	127817	324.676					124.19	59.2895
Q1/2007	2007-03-31	3251.1	265.655	485.26	546.121	391.335	365.315	129231	327.18					135.95	61.4765
Q2/2007	2007-06-30	3298.45	254.98	491.216	528.145	380.234	367.052	126434	330.988					131.48	61.7406
Q3/2007	2007-09-30	3283.59	262.985	492.6	545.361	380.794	383.905	123874	331.512					135.77	64.1697
Q4/2007	2007-12-31	3233.22	262.952	495.932	543.69	375.152	392.468	123482	335.12					135.35	64.3454
Q1/2008	2008-03-31	3145.53	271.726	499.108	554.678	390.905	390.573	122671	330.504					138.12	63.7766
Q2/2008	2008-06-30	3117.34	259.063	494.78	531.841	378.969	385.865	124144	328.784					132.44	61.3308
Q3/2008	2008-09-30	3054.74	236.254	491.68	550.83	365.451	389.588	118760	315.452					137.13	56.7933
Q4/2008	2008-12-31	2835.9	214.323	471.892	530.17	339.286	367.524	123560	302.608					131.96	50.9882
Q1/2009	2009-03-31	2575.75	199.254	436.704	467.202	322.472	328.364	107405	264.332					116.35	45.6796
Q2/2009	2009-06-30	2471.82	208.419	415.312	426.754	303.05	314.642	104123	264.552					106.27	46.5029
Q3/2009	2009-09-30	2459.51	202.939	409.816	453.787	304.286	328.14	98716	265.484					112.96	44.0994
Q4/2009	2009-12-31	2593.5	198.561	431.94	437.992	314.623	343.264	99570	263.62					109.03	43.7549
Q1/2010	2010-03-31	2647.48	224.457	419.82	478.683	322.264	369.467	102097	259.044					119.19	49.0768
Q2/2010	2010-06-30	2767.65	223.422	433.204	516.008	324.933	362.064	104072	257.652					128.44	47.8888
Q3/2010	2010-09-30	2838.97	240.613	447.612	512.361	322.684	382.183	107991	252.624					127.51	51.5915
Q4/2010	2010-12-31	2811.05	237.05	443.94	510.285	341.622	370.675	107615	248.876					127.02	48.7129
Q1/2011	2011-03-31	2747.97	218.517	469.972	548.842	339.621	378.5	107018	243.976					136.62	46.1398
Q2/2011	2011-06-30	2826.71	232.692	470.84	567.883	331.972	378.614	106141	238.184					141.4	51.0766
Q3/2011	2011-09-30	2826.43	251.829	470.08	552.842	323.449	383.621	109323	233.492					137.62	53.6567
Q4/2011	2011-12-31	2981.95	242.936	461.68	541.246	310.11	386.632	110333	229.088					134.73	48.2315
Q1/2012	2012-03-31	3019.64	226.991	459.62	522.978	297.012	391.838	113061	222.172					130.22	48.4664
Q2/2012	2012-06-30	3074.56	262.938	456.932	511.942	279.262	395.354	111762	215.712					127.55	50.5175
Q3/2012	2012-09-30	3055.55	260.593	459.144	500.905	268.893	399.352	112255	210.148					124.68	49.741
Q4/2012	2012-12-31	3021.9	256.237	453.788	501.766	265.735	395.346	111905	206.484					124.9	49.4036
Q1/2013	2013-03-31	3093.77	250.011	450.6	500.058	255.534	427.969	112349	204.224					124.53	47.5805
Q2/2013	2013-06-30	3121.05	269.59	456.836	523.195	258.208	422.425	112990	202.032					130.35	48.568
Q3/2013	2013-09-30	3204.8	287.447	463.624	524.815	264.895	429.65	117528	204.508					130.63	53.1082
Q4/2013	2013-12-31	3233.51	306.995	463.164	518.942	264.707	437.826	120369	204.26					129.13	51.4237
Q1/2014	2014-03-31	3182.51	305.744	469.184	536.299	264.536	435.281	120398	213.692					133.57
Q2/2014	2014-06-30	3289.67	294.236	472.64	536.552	268.972	428.402	120872	215.12					133.7
Q3/2014	2014-09-30	3365.33	308.493	479.908	513.206	268.011	429.833	119120	215.692					127.72
Q4/2014	2014-12-31	3360.46	325.857	472.876	522.119	259.885	439.183	118796	217.656					129.83
Q1/2015	2015-03-31	3441.41	328.359	479.892	530.942	270.086	429.062	123010	228.492					132.27
Q2/2015	2015-06-30	3462.5	308.529	471.784	517.981	269.245	411.545	124104	232.992					129.15
Q3/2015	2015-09-30	3476.86	313.638	485.552	520.614	269.902	395.634	123301	236.1					129.63
Q4/2015	2015-12-31	3423.95	331.726	499.42	532.36	271.464	395.6	122697	239.372					132.34
Q1/2016	2016-03-31	3406.01	325.227	495.172	538.399	271.502	389.04	122732	238.9					134.13
Q2/2016	2016-06-30	3375.29	310.904	482.656	526.6	272.507	393.703	125812	242.46					131.4
Q3/2016	2016-09-30	3384.77	338.325	499.036	540.12	274.376	400.28	123182	240.612					134.45
Q4/2016	2016-12-31	3447.56	317.688	498	549.793	278.456	385.929	122788	243.608					136.45
Q1/2017	2017-03-31	3444.4	326.522	520.856	543.478	271.162	405.777	123969	251.092					136.89
Q2/2017	2017-06-30	3467.96	322.956	513.844	559.071	284.6	412.255	125816	252.312					140.52
Q3/2017	2017-09-30	3514.43	327.429	525.464	569.702	286.049	419.869	127579	256.368					141.98
Q4/2017	2017-12-31	3563.39	337.699	522.68	569.601	284.813	426.084	128146	258.7					141.74
Q1/2018	2018-03-31	3617.97	334.777	525.152	577.476	287.301	428.085	126949	261.812					143.44
Q2/2018	2018-06-30	3667.66	337.572	529.915	583.472	290.949	431.402	128506	264.735
Q3/2018	2018-09-30	3708.22	338.307	534.847	589.48	293.329	434.816	129149	267.691
Q4/2018	2018-12-31	3749.53	338.988	539.794	595.572	295.728	438.269	129214	270.68
Q1/2019	2019-03-31	3790.67	339.593	544.74	601.411	297.93	441.773	129375	273.389
Q2/2019	2019-06-30	3832.51	340.089	549.684	607.346	300.148	445.046	129473	276.046
Q3/2019	2019-09-30	3874.53	340.503	554.635	613.161	302.383	448.188	129281	278.729
Q4/2019	2019-12-31	3917.65	340.92	559.572	619.031	304.634	451.302	128744	281.44

## Sheet: Total GFCF
Q1/1960 !Q mag=bil	.excel_last	Q111ic@OUTLOOK	Q112ic@OUTLOOK	Q132ic@OUTLOOK		Q136ic@OUTLOOK	Q156ic@OUTLOOK	Q158ic@OUTLOOK	Q184ic@OUTLOOK			GERMANY	Q1/1960 !Q mag=bil	S134NFC@G10	Q134IC@OUTLOOK						Q1/1960 !Q	Q134ICP@OUTLOOK					(Q134ICP@OUTLOOK) - historical
.DESC		United States: Gross Fixed Capital Formation, Total, Vol(SAAR,Bil.Chn.2009.US$)	UK: Gross Fixed Capital Formation, Total, Volume(SAAR,Bil.Chn.2015.Pound)	France: Gross Fixed Capital Formation, Total, Volume(SAAR,Bil.Chn.2010.Euro)	Germany: Gross Fixed Capital Formation, Total, Volume(Bil.Ch.2010.EUR)	Italy: Gross Fixed Capital Formation, Total, Volume(SAAR,Bil.Ch.2010.Euro)	Canada: Gross Fixed Capital Formation, Total, Volume(SAAR,Bil.Chn.2007.C$)	Japan: Gross Fixed Capital Formation, Total, Volume(SAAR,Bil.Chn.2011.Yen)	Spain: Gross Fixed Capital Formation, Total, Volume(SAAR,Bil.Chn.2010.Euro)				.DESC	Germany: GDP: Gross Fixed Capital Formation (SWDA, Bil.Chained.2010.Euros)	Germany: Gross Fixed Capital Formation, Total, Volume(SAAR,Bil.Chn.2010.Euro)	Germany: Gross Fixed Capital Formation, Total, Volume(Bil.Ch.2005.EUR)	Comparison				.DESC	Germany: Gross Fixed Capital Formation Growth, Volume (Annualized % Change)	Comparison				Germany: Gross Fixed Capital Formation Growth, Volume(Annualized % Change)
.T1		Q1-1960	Q1-1960	Q1-1960	Q1-1960	Q1-1960	Q1-1961	Q1-1960	Q1-1960				.T1	Q1-1970	Q1-1991	Spliced					.T1	Q2-1991					Q2-1960
.TN		Q4-2019	Q4-2019	Q4-2019	Q4-2019	Q4-2019	Q4-2019	Q4-2019	Q4-2019				.TN	Q1-2018	Q4-2019						.TN	Q4-2019					Q4-2015
.LSOURCE		Organization for Economic Cooperation & Development	Organization for Economic Cooperation & Development	Organization for Economic Cooperation & Development	Organization for Economic Cooperation & Devt	Organization for Economic Cooperation & Development	Organization for Economic Cooperation & Development	Organization for Economic Cooperation & Development	Organization for Economic Cooperation & Development				.LSOURCE	Deutsche Bundesbank/Haver Analytics	Organization for Economic Cooperation & Development				Series Difference	Growth Rate Implied by the Spliced Series	.LSOURCE	Organization for Economic Cooperation & Development				Historical Germany Series	Organization for Economic Cooperation & Devt
.DTLM		May-30-2018 07:53	May-30-2018 07:53	May-30-2018 07:53		May-30-2018 07:53	May-30-2018 07:53	May-30-2018 07:53	May-30-2018 07:53				.DTLM	May-24-2018 01:20	May-30-2018 07:53						.DTLM	May-30-2018 07:53					May-09-2014 15:38
Q1/1960	1960-03-31	557.917	84.244	90.136	195.986	108.849	#N/A	11851	26.657				Q1/1960	#N/A	#N/A	195.986	#N/A	44.7185	#N/A		Q1/1960	#N/A	#N/A	#N/A		193.159	#N/A
Q2/1960	1960-06-30	548.692	86.676	92.564	196.917	113.633	#N/A	11994	27.416				Q2/1960	#N/A	#N/A	196.917	#N/A	44.9309	#N/A	1.9135	Q2/1960	#N/A	#N/A	#N/A		194.076	1.9135
Q3/1960	1960-09-30	544.96	88.284	95.028	198.779	117.192	#N/A	12863	28.376				Q3/1960	#N/A	#N/A	198.779	#N/A	45.3557	#N/A	3.8359	Q3/1960	#N/A	#N/A	#N/A		195.911	3.8359
Q4/1960	1960-12-31	542.866	91.08	97.236	201.902	116.747	#N/A	13633	29.648				Q4/1960	#N/A	#N/A	201.902	#N/A	46.0684	#N/A	6.4352	Q4/1960	#N/A	#N/A	#N/A		198.989	6.4352
Q1/1961	1961-03-31	551.065	93.396	102.376	206.287	122.365	52.611	14582	31.232				Q1/1961	#N/A	#N/A	206.287	#N/A	47.069	#N/A	8.9751	Q1/1961	#N/A	#N/A	#N/A		203.311	8.9751
Q2/1961	1961-06-30	548.883	94.956	103.008	209.95	123.811	53.965	14840	32.591				Q2/1961	#N/A	#N/A	209.95	#N/A	47.9046	#N/A	7.2924	Q2/1961	#N/A	#N/A	#N/A		206.921	7.2924
Q3/1961	1961-09-30	564.535	96.304	105.772	212.889	130.208	55.784	15765	33.724				Q3/1961	#N/A	#N/A	212.889	#N/A	48.5752	#N/A	5.7181	Q3/1961	#N/A	#N/A	#N/A		209.817	5.7181
Q4/1961	1961-12-31	585.184	93.972	107.408	215.503	132.822	55.85	16788	34.678				Q4/1961	#N/A	#N/A	215.503	#N/A	49.1718	#N/A	5.0044	Q4/1961	#N/A	#N/A	#N/A		212.395	5.0044
Q1/1962	1962-03-31	595.329	94.728	109.6	217.794	137.049	56.688	17189	35.452				Q1/1962	#N/A	#N/A	217.794	#N/A	49.6945	#N/A	4.3203	Q1/1962	#N/A	#N/A	#N/A		214.652	4.3203
Q2/1962	1962-06-30	605.194	96.852	110.652	219.351	138.161	56.395	17570	36.309				Q2/1962	#N/A	#N/A	219.351	#N/A	50.0498	#N/A	2.8908	Q2/1962	#N/A	#N/A	#N/A		216.187	2.8908
Q3/1962	1962-09-30	613.204	96.404	113.112	220.175	139.719	58.215	17963	37.248				Q3/1962	#N/A	#N/A	220.175	#N/A	50.2378	#N/A	1.5105	Q3/1962	#N/A	#N/A	#N/A		216.999	1.5105
Q4/1962	1962-12-31	609.454	94.156	112.932	219.657	144.002	57.745	18305	38.202				Q4/1962	#N/A	#N/A	219.657	#N/A	50.1195	#N/A	-0.9381	Q4/1962	#N/A	#N/A	#N/A		216.488	-0.9381
Q1/1963	1963-03-31	611.104	86.988	112.74	217.797	146.282	57.291	18517	39.172				Q1/1963	#N/A	#N/A	217.797	#N/A	49.6951	#N/A	-3.3445	Q1/1963	#N/A	#N/A	#N/A		214.655	-3.3445
Q2/1963	1963-06-30	629.813	98.66	119.58	218.654	150.454	58.525	19385	40.297				Q2/1963	#N/A	#N/A	218.654	#N/A	49.8908	#N/A	1.584	Q2/1963	#N/A	#N/A	#N/A		215.5	1.584
Q3/1963	1963-09-30	652.516	100.72	125.92	222.229	152.734	59.54	20229	41.578				Q3/1963	#N/A	#N/A	222.229	#N/A	50.7064	#N/A	6.7019	Q3/1963	#N/A	#N/A	#N/A		219.023	6.7019
Q4/1963	1963-12-31	661.629	104.732	125.92	228.685	154.625	62.181	21509	42.997				Q4/1963	#N/A	#N/A	228.685	#N/A	52.1795	#N/A	12.1361	Q4/1963	#N/A	#N/A	#N/A		225.386	12.1361
Q1/1964	1964-03-31	681.507	109.992	130.044	238.021	152.845	64.946	22193	44.553				Q1/1964	#N/A	#N/A	238.021	#N/A	54.3098	#N/A	17.3585	Q1/1964	#N/A	#N/A	#N/A		234.588	17.3585
Q2/1964	1964-06-30	681.254	112.944	131.64	245.199	145.336	65.771	22521	46.214				Q2/1964	#N/A	#N/A	245.199	#N/A	55.9476	#N/A	12.6195	Q2/1964	#N/A	#N/A	#N/A		241.662	12.6195
Q3/1964	1964-09-30	689.937	114.656	135.16	250.219	138.05	66.811	23287	47.979				Q3/1964	#N/A	#N/A	250.219	#N/A	57.0929	#N/A	8.4433	Q3/1964	#N/A	#N/A	#N/A		246.609	8.4433
Q4/1964	1964-12-31	694.2	116.848	136.984	253.643	132.711	71.14	24040	49.885				Q4/1964	#N/A	#N/A	253.643	#N/A	57.8742	#N/A	5.5868	Q4/1964	#N/A	#N/A	#N/A		249.984	5.5868
Q1/1965	1965-03-31	713.706	119.004	137.332	255.471	129.54	71.222	23983	51.933				Q1/1965	#N/A	#N/A	255.471	#N/A	58.2913	#N/A	2.9146	Q1/1965	#N/A	#N/A	#N/A		251.786	2.9146
Q2/1965	1965-06-30	730.287	117.416	140.5	257.365	129.596	72.184	23840	53.932				Q2/1965	#N/A	#N/A	257.365	#N/A	58.7236	#N/A	2.9992	Q2/1965	#N/A	#N/A	#N/A		253.653	2.9992
Q3/1965	1965-09-30	753.527	118.38	140.932	259.326	131.264	75.976	24303	55.882				Q3/1965	#N/A	#N/A	259.326	#N/A	59.1709	#N/A	3.0818	Q3/1965	#N/A	#N/A	#N/A		255.585	3.0818
Q4/1965	1965-12-31	766.286	120.936	145.54	261.514	130.708	78.436	24633	57.886				Q4/1965	#N/A	#N/A	261.514	#N/A	59.6702	#N/A	3.4189	Q4/1965	#N/A	#N/A	#N/A		257.742	3.4189
Q1/1966	1966-03-31	797.254	118.56	147.792	263.931	129.373	80.941	25202	59.944				Q1/1966	#N/A	#N/A	263.931	#N/A	60.2217	#N/A	3.7485	Q1/1966	#N/A	#N/A	#N/A		260.124	3.7485
Q2/1966	1966-06-30	783.514	117.384	150.948	263.941	132.432	83.408	27935	61.632				Q2/1966	#N/A	#N/A	263.941	#N/A	60.224	#N/A	0.0151	Q2/1966	#N/A	#N/A	#N/A		260.134	0.0151
Q3/1966	1966-09-30	792.776	119.176	153.612	261.544	140.887	82.666	28570	62.949				Q3/1966	#N/A	#N/A	261.544	#N/A	59.6771	#N/A	-3.5836	Q3/1966	#N/A	#N/A	#N/A		257.771	-3.5836
Q4/1966	1966-12-31	781.348	119.592	154.952	256.131	140.942	83.693	28424	63.836				Q4/1966	#N/A	#N/A	256.131	#N/A	58.4418	#N/A	-8.0258	Q4/1966	#N/A	#N/A	#N/A		252.436	-8.0258
Q1/1967	1967-03-31	774.308	124.504	159.608	247.701	145.058	83.879	29618	64.293				Q1/1967	#N/A	#N/A	247.701	#N/A	56.5184	#N/A	-12.5292	Q1/1967	#N/A	#N/A	#N/A		244.127	-12.5292
Q2/1967	1967-06-30	780.945	130.296	162.204	242.546	150.454	83.545	31658	65.105				Q2/1967	#N/A	#N/A	242.546	#N/A	55.3421	#N/A	-8.0683	Q2/1967	#N/A	#N/A	#N/A		239.047	-8.0683
Q3/1967	1967-09-30	789.761	130.884	164.344	240.666	154.069	82.377	33210	66.273				Q3/1967	#N/A	#N/A	240.666	#N/A	54.9132	#N/A	-3.0647	Q3/1967	#N/A	#N/A	#N/A		237.194	-3.0647
Q4/1967	1967-12-31	806.53	130.464	167.104	241.331	157.851	81.205	35285	67.702				Q4/1967	#N/A	#N/A	241.331	#N/A	55.065	#N/A	1.1109	Q4/1967	#N/A	#N/A	#N/A		237.85	1.1109
Q1/1968	1968-03-31	817.641	140.488	171.54	249.292	158.463	82.888	37091	69.391				Q1/1968	#N/A	#N/A	249.292	#N/A	56.8814	#N/A	13.8613	Q1/1968	#N/A	#N/A	#N/A		245.695	13.8613
Q2/1968	1968-06-30	816.846	139.076	161.964	243.347	163.802	82.95	38151	71.126				Q2/1968	#N/A	#N/A	243.347	#N/A	55.5249	#N/A	-9.203	Q2/1968	#N/A	#N/A	#N/A		239.836	-9.203
Q3/1968	1968-09-30	824.491	142.968	176.772	249.212	172.146	83	38676	72.907				Q3/1968	#N/A	#N/A	249.212	#N/A	56.8633	#N/A	9.9956	Q3/1968	#N/A	#N/A	#N/A		245.617	9.9956
Q4/1968	1968-12-31	834.206	150.232	179.76	262.445	178.597	85.014	42202	74.862				Q4/1968	#N/A	#N/A	262.445	#N/A	59.8825	#N/A	22.9912	Q4/1968	#N/A	#N/A	#N/A		258.659	22.9912
Q1/1969	1969-03-31	859.277	138.7	178.956	269.136	178.709	85.88	41959	76.989				Q1/1969	#N/A	#N/A	269.136	#N/A	61.4093	#N/A	10.595	Q1/1969	#N/A	#N/A	#N/A		265.253	10.595
Q2/1969	1969-06-30	848.708	139.432	185.532	272.273	185.939	87.3	44680	78.74				Q2/1969	#N/A	#N/A	272.273	#N/A	62.125	#N/A	4.7437	Q2/1969	#N/A	#N/A	#N/A		268.345	4.7437
Q3/1969	1969-09-30	859.031	144.432	188.108	279.844	184.549	88.026	48062	80.112				Q3/1969	#N/A	#N/A	279.844	#N/A	63.8526	#N/A	11.5961	Q3/1969	#N/A	#N/A	#N/A		275.807	11.5961
Q4/1969	1969-12-31	826.046	145.132	191.104	279.119	175.983	88.662	50725	81.26				Q4/1969	#N/A	#N/A	279.119	#N/A	63.687	#N/A	-1.0331	Q4/1969	#N/A	#N/A	#N/A		275.092	-1.0331
Q1/1970	1970-03-31	828.723	140.776	190.936	274.821	186.758	88.802	52411	83.907				Q1/1970	68.35	#N/A	274.821	62.7064	62.7064	-6.39488e-14	-6.018	Q1/1970	#N/A	#N/A	#N/A		270.856	-6.018
Q2/1970	1970-06-30	809.618	146.644	195.416	297.418	185.304	85.674	53244	82.713				Q2/1970	73.97	#N/A	297.418	67.8624	67.8624	0	37.1729	Q2/1970	#N/A	#N/A	#N/A		293.106	37.1327
Q3/1970	1970-09-30	823.604	148.352	198.184	313.38	188.444	87.968	55016	81.365				Q3/1970	77.94	#N/A	313.38	71.5046	71.5046	0	23.2591	Q3/1970	#N/A	#N/A	#N/A		308.827	23.2433
Q4/1970	1970-12-31	823.081	152.844	198.624	313.3	186.701	89.388	55140	79.985				Q4/1970	77.92	#N/A	313.3	71.4862	71.4862	0	-0.102604	Q4/1970	#N/A	#N/A	#N/A		308.738	-0.115
Q1/1971	1971-03-31	821.571	149.972	204.54	308.596	189.421	90.011	55788	78.431				Q1/1971	76.75	#N/A	308.596	70.4128	70.4128	0	-5.87223	Q1/1971	#N/A	#N/A	#N/A		304.13	-5.8375
Q2/1971	1971-06-30	846.078	157.256	208.188	319.452	186.298	93.742	56372	78.624				Q2/1971	79.45	#N/A	319.452	72.8899	72.8899	0	14.8318	Q2/1971	#N/A	#N/A	#N/A		314.833	14.8377
Q3/1971	1971-09-30	859.513	160.904	211.168	319.251	186.54	95.925	56638	79.368				Q3/1971	79.4	#N/A	319.251	72.844	72.844	0	-0.251493	Q3/1971	#N/A	#N/A	#N/A		314.611	-0.2819
Q4/1971	1971-12-31	871.878	163.256	213.14	319.773	187.296	97.699	57174	81.705				Q4/1971	79.53	#N/A	319.773	72.9633	72.9633	0	0.656522	Q4/1971	#N/A	#N/A	#N/A		315.189	0.7362
Q1/1972	1972-03-31	899.025	161.76	216.852	320.256	189.558	97.955	60459	85.378				Q1/1972	79.65	#N/A	320.256	73.0734	73.0734	0	0.604913	Q1/1972	#N/A	#N/A	#N/A		315.655	0.593
Q2/1972	1972-06-30	913.629	167.084	219.764	320.939	188.695	99.189	61335	89.622				Q2/1972	79.82	#N/A	320.939	73.2294	73.2294	0	0.856472	Q2/1972	#N/A	#N/A	#N/A		316.232	0.7337
Q3/1972	1972-09-30	912.827	166.656	223.084	327.855	194.685	98.409	62588	92.697				Q3/1972	81.54	#N/A	327.855	74.8073	74.8073	0	8.90202	Q3/1972	#N/A	#N/A	#N/A		323.116	8.995
Q4/1972	1972-12-31	956.836	166.152	227.46	331.313	197.038	97.402	64374	95.612				Q4/1972	82.4	#N/A	331.313	75.5963	75.5963	0	4.286	Q4/1972	#N/A	#N/A	#N/A		326.535	4.3008
Q1/1973	1973-03-31	999.916	174.768	230.608	335.495	197.059	102.643	68296	99.092				Q1/1973	83.44	#N/A	335.495	76.5505	76.5505	0	5.14493	Q1/1973	#N/A	#N/A	#N/A		330.643	5.1284
Q2/1973	1973-06-30	1000.64	169.02	234.76	330.268	198.572	104.904	69036	101.846				Q2/1973	82.14	#N/A	330.268	75.3578	75.3578	0	-6.08789	Q2/1973	#N/A	#N/A	#N/A		325.492	-6.0882
Q3/1973	1973-09-30	991.333	165.628	240.168	326.247	205.897	106.926	69550	103.573				Q3/1973	81.14	#N/A	326.247	74.4404	74.4404	0	-4.78153	Q3/1973	#N/A	#N/A	#N/A		321.539	-4.7696
Q4/1973	1973-12-31	986.58	164.864	243.156	317.039	210.279	110.723	70642	106.026				Q4/1973	78.85	#N/A	317.039	72.3394	72.3394	0	-10.8201	Q4/1973	#N/A	#N/A	#N/A		312.435	-10.854
Q1/1974	1974-03-31	974.602	163.396	244.208	317.12	209.014	115.027	64942	108.549				Q1/1974	78.87	#N/A	317.12	72.3578	72.3578	0	0.101497	Q1/1974	#N/A	#N/A	#N/A		312.513	0.0999
Q2/1974	1974-06-30	971.41	154.472	246.184	299.267	206.446	111.152	62880	109.692				Q2/1974	74.43	#N/A	299.267	68.2844	68.2844	0	-20.6869	Q2/1974	#N/A	#N/A	#N/A		294.926	-20.6798
Q3/1974	1974-09-30	952.849	152.744	243.92	294.362	214.172	111.23	62919	109.55				Q3/1974	73.21	#N/A	294.362	67.1651	67.1651	0	-6.39705	Q3/1974	#N/A	#N/A	#N/A		290.13	-6.3481
Q4/1974	1974-12-31	906.215	153.396	237.444	290.18	204.175	110.665	63173	108.208				Q4/1974	72.17	#N/A	290.18	66.211	66.211	0	-5.56235	Q4/1974	#N/A	#N/A	#N/A		286	-5.5737
Q1/1975	1975-03-31	868.946	149.32	232.536	299.066	198.948	111.697	60694	105.955				Q1/1975	74.38	#N/A	299.066	68.2385	68.2385	0	12.8231	Q1/1975	#N/A	#N/A	#N/A		294.749	12.809
Q2/1975	1975-06-30	843.978	148.716	231.208	273.655	197.116	114.779	63393	104.029				Q2/1975	68.06	#N/A	273.655	62.4404	62.4404	-7.10543e-14	-29.896	Q2/1975	#N/A	#N/A	#N/A		269.702	-29.8987
Q3/1975	1975-09-30	876.966	146.476	227.82	282.46	198.029	119.327	63908	103.592				Q3/1975	70.25	#N/A	282.46	64.4495	64.4495	0	13.5057	Q3/1975	#N/A	#N/A	#N/A		278.406	13.5481
Q4/1975	1975-12-31	899.234	142.252	232.452	292.11	196.29	121.304	64193	102.803				Q4/1975	72.65	#N/A	292.11	66.6514	66.6514	0	14.3819	Q4/1975	#N/A	#N/A	#N/A		287.821	14.2286
Q1/1976	1976-03-31	933.884	149.344	237.9	289.256	195.79	122.562	65841	102.931				Q1/1976	71.94	#N/A	289.256	66	66	0	-3.85222	Q1/1976	#N/A	#N/A	#N/A		285.056	-3.7867
Q2/1976	1976-06-30	931.416	148.008	238.784	293.799	192.468	126.697	64885	103.284				Q2/1976	73.07	#N/A	293.799	67.0367	67.0367	0	6.43261	Q2/1976	#N/A	#N/A	#N/A		289.542	6.4439
Q3/1976	1976-09-30	936.374	146.224	234.616	289.698	196.349	123.52	65539	103.406				Q3/1976	72.05	#N/A	289.698	66.1009	66.1009	0	-5.46786	Q3/1976	#N/A	#N/A	#N/A		285.501	-5.467
Q4/1976	1976-12-31	969.774	147.24	233.256	300.835	201.577	124.254	63238	103.419				Q4/1976	74.82	#N/A	300.835	68.6422	68.6422	0	16.288	Q4/1976	#N/A	#N/A	#N/A		296.469	16.2764
Q1/1977	1977-03-31	1003.58	143.504	235.3	312.415	203.401	126.099	66110	103.355				Q1/1977	77.7	#N/A	312.415	71.2844	71.2844	0	16.309	Q1/1977	#N/A	#N/A	#N/A		307.85	16.2614
Q2/1977	1977-06-30	1053.22	151.412	234.184	303.328	203.651	127.048	65946	102.353				Q2/1977	75.44	#N/A	303.328	69.211	69.211	0	-11.1367	Q2/1977	#N/A	#N/A	#N/A		298.923	-11.1036
Q3/1977	1977-09-30	1059.32	149.788	234.88	305.258	200.095	128.463	66692	101.782				Q3/1977	75.92	#N/A	305.258	69.6514	69.6514	0	2.56946	Q3/1977	#N/A	#N/A	#N/A		300.833	2.58
Q4/1977	1977-12-31	1070.42	155.332	233.896	309.922	200.135	127.518	68150	101.839				Q4/1977	77.08	#N/A	309.922	70.7156	70.7156	0	6.2532	Q4/1977	#N/A	#N/A	#N/A		305.407	6.2221
Q1/1978	1978-03-31	1075.32	160.824	237.512	318.648	198.456	127.04	69737	101.544				Q1/1978	79.25	#N/A	318.648	72.7064	72.7064	0	11.7456	Q1/1978	#N/A	#N/A	#N/A		314.034	11.7861
Q2/1978	1978-06-30	1164.68	161.06	240.748	315.511	200.876	130.061	71870	100.337				Q2/1978	78.47	#N/A	315.511	71.9908	71.9908	0	-3.87917	Q2/1978	#N/A	#N/A	#N/A		310.969	-3.8465
Q3/1978	1978-09-30	1198.14	160.932	241.544	328.378	204.871	129.949	72224	98.95				Q3/1978	81.67	#N/A	328.378	74.9266	74.9266	0	17.3372	Q3/1978	#N/A	#N/A	#N/A		323.626	17.3023
Q4/1978	1978-12-31	1224.97	161.468	244.724	330.067	210.04	131.62	74219	97.442				Q4/1978	82.09	#N/A	330.067	75.3119	75.3119	0	2.07298	Q4/1978	#N/A	#N/A	#N/A		325.27	2.0466
Q1/1979	1979-03-31	1217.96	169.744	242.904	322.105	209.236	133.164	75127	95.772				Q1/1979	80.11	#N/A	322.105	73.4954	73.4954	0	-9.30447	Q1/1979	#N/A	#N/A	#N/A		317.463	-9.2602
Q2/1979	1979-06-30	1219.6	173.644	244.892	348.401	212.098	134.451	76292	94.835				Q2/1979	86.65	#N/A	348.401	79.4954	79.4954	0	36.876	Q2/1979	#N/A	#N/A	#N/A		343.4	36.9081
Q3/1979	1979-09-30	1251.52	176.88	250.672	350.532	217.693	141.496	76967	94.79				Q3/1979	87.18	#N/A	350.532	79.9817	79.9817	0	2.46916	Q3/1979	#N/A	#N/A	#N/A		345.443	2.4011
Q4/1979	1979-12-31	1241.06	179.372	254.836	354.835	226.24	142.222	76647	95.355				Q4/1979	88.25	#N/A	354.835	80.9633	80.9633	0	5.00051	Q4/1979	#N/A	#N/A	#N/A		349.707	5.0291
Q1/1980	1980-03-31	1234.48	170.68	256.96	360.906	222.796	144	76223	97.526				Q1/1980	89.76	#N/A	360.906	82.3486	82.3486	0	7.02187	Q1/1980	#N/A	#N/A	#N/A		355.691	7.0222
Q2/1980	1980-06-30	1135.83	164.004	256.392	354.674	222.711	140.435	75619	96.234				Q2/1980	88.21	#N/A	354.674	80.9266	80.9266	0	-6.73044	Q2/1980	#N/A	#N/A	#N/A		349.562	-6.7161
Q3/1980	1980-09-30	1136.07	161.052	255.76	349.004	221.775	146.32	75060	93.799				Q3/1980	86.8	#N/A	349.004	79.633	79.633	0	-6.24216	Q3/1980	#N/A	#N/A	#N/A		343.966	-6.2512
Q4/1980	1980-12-31	1175.48	158.72	254.256	342.169	223.791	150.442	76957	95.864				Q4/1980	85.1	#N/A	342.169	78.0734	78.0734	0	-7.60694	Q4/1980	#N/A	#N/A	#N/A		337.171	-7.6708
Q1/1981	1981-03-31	1189.16	149.972	252.876	342.008	221.009	157.668	78253	93.871				Q1/1981	85.06	#N/A	342.008	78.0367	78.0367	0	-0.187882	Q1/1981	#N/A	#N/A	#N/A		337.038	-0.1574
Q2/1981	1981-06-30	1187.45	153.448	253.308	347.999	221.747	161.89	77660	94.676				Q2/1981	86.55	#N/A	347.999	79.4037	79.4037	0	7.19309	Q2/1981	#N/A	#N/A	#N/A		342.945	7.1967
Q3/1981	1981-09-30	1183.38	154.732	252.88	335.937	221.48	158.142	78642	95.065				Q3/1981	83.55	#N/A	335.937	76.6514	76.6514	0	-13.1605	Q3/1981	#N/A	#N/A	#N/A		331.087	-13.1298
Q4/1981	1981-12-31	1183.85	152.852	254.536	317.321	215.992	156.496	78270	93.468				Q4/1981	78.92	#N/A	317.321	72.4037	72.4037	0	-20.3909	Q4/1981	#N/A	#N/A	#N/A		312.79	-20.34
Q1/1982	1982-03-31	1146.33	152.616	252.74	321.744	217.361	151.44	77376	95.039				Q1/1982	80.02	#N/A	321.744	73.4128	73.4128	0	5.69292	Q1/1982	#N/A	#N/A	#N/A		317.12	5.654
Q2/1982	1982-06-30	1120.15	159.52	253.684	321.904	211.373	141.206	78611	94.793				Q2/1982	80.06	#N/A	321.904	73.4495	73.4495	0	0.2001	Q2/1982	#N/A	#N/A	#N/A		317.209	0.1121
Q3/1982	1982-09-30	1091.44	164.22	249.976	316.275	209.723	134.93	78734	95.208				Q3/1982	78.66	#N/A	316.275	72.1651	72.1651	0	-6.81341	Q3/1982	#N/A	#N/A	#N/A		311.614	-6.8714
Q4/1982	1982-12-31	1098.18	166.076	247.372	318.125	211.015	138.086	78234	95.844				Q4/1982	79.12	#N/A	318.125	72.5872	72.5872	0	2.35978	Q4/1982	#N/A	#N/A	#N/A		313.567	2.5319
Q1/1983	1983-03-31	1118.31	170.968	246.236	318.326	209.222	137.314	77496	96.078				Q1/1983	79.17	#N/A	318.326	72.633	72.633	0	0.25302	Q1/1983	#N/A	#N/A	#N/A		313.701	0.1704
Q2/1983	1983-06-30	1156.92	168.888	243.572	329.222	209.389	140.209	76855	94.793				Q2/1983	81.88	#N/A	329.222	75.1193	75.1193	0	14.4113	Q2/1983	#N/A	#N/A	#N/A		324.448	14.4237
Q3/1983	1983-09-30	1223.12	170.52	242.564	329.624	210.389	141.662	77183	94.111				Q3/1983	81.98	#N/A	329.624	75.211	75.211	0	0.489415	Q3/1983	#N/A	#N/A	#N/A		324.848	0.4937
Q4/1983	1983-12-31	1285.87	178.512	241.456	336.54	211.469	142.711	77185	91.196				Q4/1983	83.7	#N/A	336.54	76.789	76.789	0	8.66012	Q4/1983	#N/A	#N/A	#N/A		331.598	8.5744
Q1/1984	1984-03-31	1327.26	182.328	242.56	324.759	213.612	143.035	78571	91.131				Q1/1984	80.77	#N/A	324.759	74.1009	74.1009	0	-13.2841	Q1/1984	#N/A	#N/A	#N/A		320.018	-13.2535
Q2/1984	1984-06-30	1378.68	182.984	240.948	317.321	217.206	142.854	81639	88.372				Q2/1984	78.92	#N/A	317.321	72.4037	72.4037	0	-8.85183	Q2/1984	#N/A	#N/A	#N/A		312.735	-8.7974
Q3/1984	1984-09-30	1406.15	183.272	240.776	335.374	222.103	144.099	80715	88.97				Q3/1984	83.41	#N/A	335.374	76.5229	76.5229	0	24.774	Q3/1984	#N/A	#N/A	#N/A		330.588	24.8651
Q4/1984	1984-12-31	1441.81	184.66	242.476	340.802	220.871	144.244	82102	89.716				Q4/1984	84.76	#N/A	340.802	77.7615	77.7615	0	6.63292	Q4/1984	#N/A	#N/A	#N/A		335.872	6.5494
Q1/1985	1985-03-31	1452.42	198.548	242.016	319.452	218.782	147.686	84461	92.443				Q1/1985	79.45	#N/A	319.452	72.8899	72.8899	0	-22.801	Q1/1985	#N/A	#N/A	#N/A		314.833	-22.7992
Q2/1985	1985-06-30	1483.79	182.32	246.14	333.886	221.561	154.704	86224	92.547				Q2/1985	83.04	#N/A	333.886	76.1835	76.1835	0	19.3366	Q2/1985	#N/A	#N/A	#N/A		329	19.2516
Q3/1985	1985-09-30	1485.28	183.888	250.104	336.58	221.345	159.526	88819	96.494				Q3/1985	83.71	#N/A	336.58	76.7982	76.7982	0	3.26663	Q3/1985	#N/A	#N/A	#N/A		331.709	3.3346
Q4/1985	1985-12-31	1505.44	183.156	251.312	346.27	222.294	160.97	89058	100.726				Q4/1985	86.12	#N/A	346.27	79.0092	79.0092	0	12.0229	Q4/1985	#N/A	#N/A	#N/A		341.257	12.0211
Q1/1986	1986-03-31	1511.56	181.132	252.54	337.585	227.507	162.665	89054	102.927				Q1/1986	83.96	#N/A	337.585	77.0275	77.0275	0	-9.66134	Q1/1986	#N/A	#N/A	#N/A		332.675	-9.6869
Q2/1986	1986-06-30	1516.6	176.088	256.688	341.285	226.186	162.216	91593	105.011				Q2/1986	84.88	#N/A	341.285	77.8716	77.8716	0	4.45561	Q2/1986	#N/A	#N/A	#N/A		336.361	4.5062
Q3/1986	1986-09-30	1527.07	186.032	259.284	344.3	227.692	161.099	92910	105.673				Q3/1986	85.63	#N/A	344.3	78.5596	78.5596	0	3.58152	Q3/1986	#N/A	#N/A	#N/A		339.336	3.5857
Q4/1986	1986-12-31	1526.74	195.108	261.36	356.242	229.321	161.636	94512	108.568				Q4/1986	88.6	#N/A	356.242	81.2844	81.2844	0	14.6123	Q4/1986	#N/A	#N/A	#N/A		351.105	14.611
Q1/1987	1987-03-31	1505.73	190.08	261.82	329.021	232.41	165.772	93835	112.217				Q1/1987	81.83	#N/A	329.021	75.0734	75.0734	0	-27.2362	Q1/1987	#N/A	#N/A	#N/A		324.237	-27.2719
Q2/1987	1987-06-30	1535.48	199.156	267.856	354.835	239.872	173.268	96545	116.806				Q2/1987	88.25	#N/A	354.835	80.9633	80.9633	0	35.2722	Q2/1987	#N/A	#N/A	#N/A		349.684	35.2858
Q3/1987	1987-09-30	1568.09	217.692	274.124	356.885	237.444	182.246	100900	119.818				Q3/1987	88.76	#N/A	356.885	81.4312	81.4312	0	2.33173	Q3/1987	#N/A	#N/A	#N/A		351.727	2.3574
Q4/1987	1987-12-31	1565.44	222.968	279.344	361.75	240.317	185.125	105352	124.837				Q4/1987	89.97	#N/A	361.75	82.5413	82.5413	0	5.56543	Q4/1987	#N/A	#N/A	#N/A		356.523	5.5671
Q1/1988	1988-03-31	1553.16	233.948	285.788	356.564	251.149	188.748	109243	127.888				Q1/1988	88.68	#N/A	356.564	81.3578	81.3578	0	-5.61307	Q1/1988	#N/A	#N/A	#N/A		351.35	-5.6789
Q2/1988	1988-06-30	1584.52	240.124	292.124	364.404	255.043	190.704	110758	132.666				Q2/1988	90.63	#N/A	364.404	83.1468	83.1468	0	9.09006	Q2/1988	#N/A	#N/A	#N/A		359.077	9.0912
Q3/1988	1988-09-30	1588.19	242.256	295.956	370.717	257.479	197.073	114353	136.372				Q3/1988	92.2	#N/A	370.717	84.5872	84.5872	0	7.11142	Q3/1988	#N/A	#N/A	#N/A		365.294	7.1075
Q4/1988	1988-12-31	1605.67	242	302.936	374.416	257.053	194.428	116455	140.962				Q4/1988	93.12	#N/A	374.416	85.4312	85.4312	0	4.05146	Q4/1988	#N/A	#N/A	#N/A		368.979	4.0975
Q1/1989	1989-03-31	1618.37	254.86	309.172	392.63	263.043	202.646	123539	146.071				Q1/1989	97.65	#N/A	392.63	89.5872	89.5872	0	20.9253	Q1/1989	#N/A	#N/A	#N/A		386.988	20.999
Q2/1989	1989-06-30	1624.38	249.796	313.82	383.061	263.046	201.021	118949	149.96				Q2/1989	95.27	#N/A	383.061	87.4037	87.4037	0	-9.39844	Q2/1989	#N/A	#N/A	#N/A		377.484	-9.4672
Q3/1989	1989-09-30	1656.38	252.592	317.812	395.726	266.56	200.132	122227	152.745				Q3/1989	98.42	#N/A	395.726	90.2936	90.2936	0	13.8961	Q3/1989	#N/A	#N/A	#N/A		389.919	13.842
Q4/1989	1989-12-31	1634.46	247.572	323.668	403.446	275.16	206.86	126554	153.705				Q4/1989	100.34	#N/A	403.446	92.055	92.055	0	8.03462	Q4/1989	#N/A	#N/A	#N/A		397.558	8.0693
Q1/1990	1990-03-31	1664.55	249.252	328.944	423.63	278.393	203.762	128029	154.238				Q1/1990	105.36	#N/A	423.63	96.6606	96.6606	0	21.5645	Q1/1990	#N/A	#N/A	#N/A		417.487	21.6102
Q2/1990	1990-06-30	1633.29	245.708	330.432	421.7	280.321	198.829	130937	158.918				Q2/1990	104.88	#N/A	421.7	96.2202	96.2202	0	-1.80991	Q2/1990	#N/A	#N/A	#N/A		415.533	-1.8591
Q3/1990	1990-09-30	1619.23	243.444	331.74	428.174	276.825	193.387	134532	163.131				Q3/1990	106.49	#N/A	428.174	97.6972	97.6972	0	6.28319	Q3/1990	#N/A	#N/A	#N/A		421.928	6.2995
Q4/1990	1990-12-31	1588.97	240.696	331.672	437.1	275.488	186.466	136835	165.079				Q4/1990	108.71	#N/A	437.1	99.7339	99.7339	0	8.60321	Q4/1990	#N/A	#N/A	#N/A		430.721	8.6001
Q1/1991	1991-03-31	1538.06	229.78	328.344	438.266	279.077	188.013	138336	161.93				Q1/1991	109	438.266	438.266	100	100	0	1.07134	Q1/1991	#N/A	#N/A	#N/A		438.266	7.1935
Q2/1991	1991-06-30	1542.37	226.348	330.144	440.272	280.762	185.867	134876	164.144				Q2/1991	109.5	440.272	440.272	100.459	100.458	0.0010027	1.84346	Q2/1991	1.8433	1.84346	-0.000160049		440.272	1.4902
Q3/1991	1991-09-30	1546.67	222.168	329.484	445.237	283.413	186.461	134776	162.151				Q3/1991	110.74	445.237	445.237	101.596	101.591	0.00574374	4.58773	Q3/1991	4.5871	4.58773	-0.000627173		445.237	2.8996
Q4/1991	1991-12-31	1548.68	222.988	327.364	457.522	282.14	189.054	135391	163.781				Q4/1991	113.79	457.522	457.522	104.394	104.394	0.000816688	11.5021	Q4/1991	11.5026	11.5021	0.000528266		457.522	11.3883
Q1/1992	1992-03-31	1570.76	223.604	329.516	467.3	281.403	187.726	132282	167.137				Q1/1992	116.23	467.3	467.3	106.633	106.625	0.00828365	8.82663	Q1/1992	8.8268	8.82663	0.000166153		467.3	12.4916
Q2/1992	1992-06-30	1613.78	222.268	325.84	463.69	281.375	179.996	135752	158.315				Q2/1992	115.33	463.69	463.69	105.807	105.801	0.00629625	-3.05447	Q2/1992	-3.0548	-3.05447	-0.000331432		463.69	-3.3614
Q3/1992	1992-09-30	1627.69	223.12	321.96	454.062	272.174	183.617	134009	154.329				Q3/1992	112.93	454.062	454.062	103.606	103.604	0.00130075	-8.05043	Q3/1992	-8.0503	-8.05043	0.00012818		454.062	-9.3181
Q4/1992	1992-12-31	1663.26	217.704	317.476	453.51	267.85	176.01	130348	145.279				Q4/1992	112.8	453.51	453.51	103.486	103.478	0.0079856	-0.485391	Q4/1992	-0.485	-0.485391	0.000391177		453.51	0.3688
Q1/1993	1993-03-31	1664.12	223.008	312.072	444.296	254.446	174.054	134252	142.053				Q1/1993	110.5	444.296	444.296	101.376	101.376	0.000270038	-7.8825	Q1/1993	-7.8825	-7.8825	2.11365e-07		444.296	-8.0534
Q2/1993	1993-06-30	1698.83	221.752	306.572	438.53	245.24	178.201	130150	142.981				Q2/1993	109.07	438.53	438.53	100.064	100.06	0.00398279	-5.09095	Q2/1993	-5.0916	-5.09095	-0.0006492		438.53	-4.8357
Q3/1993	1993-09-30	1717.04	222	303.036	441.689	240.3	182.054	127344	143.637				Q3/1993	109.85	441.689	441.689	100.78	100.781	-0.00121601	2.91273	Q3/1993	2.9129	2.91273	0.000170164		441.689	2.3449
Q4/1993	1993-12-31	1781.72	226.684	302.176	435.07	239.144	184.582	125374	140.715				Q4/1993	108.21	435.07	435.07	99.2752	99.2708	0.00446685	-5.86086	Q4/1993	-5.8611	-5.86086	-0.000237936		435.07	-5.3519
Q1/1994	1994-03-31	1785.59	229.332	306.628	448.834	241.201	186.96	126292	138.956				Q1/1994	111.62	448.834	448.834	102.404	102.411	-0.00765125	13.2678	Q1/1994	13.2681	13.2678	0.000306285		448.834	14.7941
Q2/1994	1994-06-30	1827.61	224.7	310.156	454.4	247.644	192.836	127914	143.104				Q2/1994	113.01	454.4	454.4	103.679	103.681	-0.00242687	5.05344	Q2/1994	5.054	5.05344	0.000555074		454.4	6.1032
Q3/1994	1994-09-30	1856.29	226.216	312.876	456.406	248.766	192.967	128374	147.318				Q3/1994	113.51	456.406	456.406	104.138	104.139	-0.00142417	1.77757	Q3/1994	1.7775	1.77757	-7.28057e-05		456.406	2.2081
Q4/1994	1994-12-31	1892.28	227.452	314.008	466.236	253.91	194.316	127931	150.544				Q4/1994	115.95	466.236	466.236	106.376	106.382	-0.00582215	8.89748	Q4/1994	8.8967	8.89748	-0.000781584		466.236	8.8721
Q1/1995	1995-03-31	1928.5	224.468	316.164	454.764	256.549	189.491	127238	155.28				Q1/1995	113.11	454.764	454.764	103.771	103.764	0.00626167	-9.48489	Q1/1995	-9.4845	-9.48489	0.000387702		454.764	-10.2882
Q2/1995	1995-06-30	1930.4	224.836	314.776	462.787	261.311	189.039	130724	156.336				Q2/1995	115.1	462.787	462.787	105.596	105.595	0.00132633	7.2458	Q2/1995	7.246	7.2458	0.000200252		462.787	8.0634
Q3/1995	1995-09-30	1946	226.476	314.9	457.923	267.846	188.585	134306	156.672				Q3/1995	113.89	457.923	457.923	104.486	104.485	0.00106286	-4.13828	Q3/1995	-4.1383	-4.13828	-2.19433e-05		457.923	-4.8821
Q4/1995	1995-12-31	1977.2	227.632	315.408	454.714	279.038	189.492	136069	156.544				Q4/1995	113.1	454.714	454.714	103.761	103.753	0.00849595	-2.77376	Q4/1995	-2.774	-2.77376	-0.000236191		454.714	-3.8125
Q1/1996	1996-03-31	2022.1	233.552	317.584	430.093	270.104	193.664	138523	160.136				Q1/1996	106.97	430.093	430.093	98.1376	98.1352	0.00246388	-19.962	Q1/1996	-19.9621	-19.962	-9.37592e-05		430.093	-19.779
Q2/1996	1996-06-30	2080.2	241.164	316.884	464.693	271.242	193.723	141395	159.812				Q2/1996	115.58	464.693	464.693	106.037	106.03	0.0067976	36.2746	Q2/1996	36.2746	36.2746	-3.41744e-05		464.693	37.9915
Q3/1996	1996-09-30	2122.8	239.184	318.284	464.091	270.679	201.641	141622	160.316				Q3/1996	115.43	464.091	464.091	105.899	105.893	0.00654242	-0.517185	Q3/1996	-0.517	-0.517185	0.00018549		464.091	-1.6164
Q4/1996	1996-12-31	2155	231.68	317.456	465.244	266.117	211.253	141111	159.976				Q4/1996	115.71	465.244	465.244	106.156	106.156	0.000340918	0.99748	Q4/1996	0.9978	0.99748	0.000319819		465.244	1.2405
Q1/1997	1997-03-31	2190.6	221.452	314.372	450.777	268.345	215.174	140223	165.06				Q1/1997	112.11	450.777	450.777	102.853	102.855	-0.00144803	-11.87	Q1/1997	-11.8702	-11.87	-0.000220632		450.777	-12.4819
Q2/1997	1997-06-30	2223	230.66	319.224	460.506	271.192	220.995	137873	167.68				Q2/1997	114.53	460.506	460.506	105.073	105.075	-0.00114927	8.91663	Q2/1997	8.9163	8.91663	-0.000325282		460.506	10.3105
Q3/1997	1997-09-30	2289.4	236.268	320.664	461.158	273.542	227.679	137160	168.576				Q3/1997	114.69	461.158	461.158	105.22	105.223	-0.00312838	0.567537	Q3/1997	0.5675	0.567537	-3.74419e-05		461.158	1.0455
Q4/1997	1997-12-31	2296.9	242.076	325.812	465.119	285.101	229.885	136164	172.808				Q4/1997	115.68	465.119	465.119	106.128	106.127	0.00133947	3.48022	Q4/1997	3.4808	3.48022	0.00058206		465.119	3.9321
Q1/1998	1998-03-31	2349.9	242.712	331.304	477.392	280.891	229.41	132910	179.864				Q1/1998	118.73	477.392	477.392	108.927	108.927	-0.000849511	10.9799	Q1/1998	10.9796	10.9799	-0.000273383		477.392	9.7768
Q2/1998	1998-06-30	2429.4	246.948	337.984	471.374	283.067	229.92	131488	181.816				Q2/1998	117.24	471.374	471.374	107.56	107.554	0.0053167	-4.94785	Q2/1998	-4.9475	-4.94785	0.000349162		471.374	-4.2599
Q3/1998	1998-09-30	2483.3	246.932	343.976	477.292	285.597	230.374	132020	189.632				Q3/1998	118.71	477.292	477.292	108.908	108.905	0.00361906	5.11728	Q3/1998	5.1166	5.11728	-0.000682311		477.292	5.544
Q4/1998	1998-12-31	2538	254.888	348.876	474.584	289.183	232.945	133023	195.216				Q4/1998	118.03	474.584	474.584	108.284	108.287	-0.00234456	-2.25023	Q4/1998	-2.2501	-2.25023	0.000128856		474.584	-3.1997
Q1/1999	1999-03-31	2577.71	253.136	357.44	488.311	290.577	235.528	131076	197.616				Q1/1999	121.45	488.311	488.311	111.422	111.419	0.00315401	12.0814	Q1/1999	12.0816	12.0814	0.000170699		488.311	10.6533
Q2/1999	1999-06-30	2635.44	252.504	363.504	492.523	293.259	241.545	132101	204.64				Q2/1999	122.5	492.523	492.523	112.385	112.38	0.00539658	3.49516	Q2/1999	3.4953	3.49516	0.000141451		492.523	4.587
Q3/1999	1999-09-30	2692.08	258.76	369.892	502.001	297.903	243.492	130619	207.004				Q3/1999	124.86	502.001	502.001	114.55	114.543	0.00792062	7.92257	Q3/1999	7.922	7.92257	-0.000566461		502.001	9.3026
Q4/1999	1999-12-31	2713.43	251.592	376.324	500.145	303.019	249.441	130521	211.876				Q4/1999	124.39	500.145	500.145	114.119	114.119	0.000215068	-1.4707	Q4/1999	-1.4702	-1.4707	0.000500123		500.145	-2.6131
Q1/2000	2000-03-31	2778.93	261.484	384.044	509.485	312.829	251.683	131244	216.1				Q1/2000	126.71	509.485	509.485	116.248	116.25	-0.00247041	7.6817	Q1/2000	7.6813	7.6817	-0.000395002		509.485	9.6273
Q2/2000	2000-06-30	2824.97	276.596	388.504	508.933	315.911	253.401	130277	218.576				Q2/2000	126.58	508.933	508.933	116.128	116.124	0.00421444	-0.432675	Q2/2000	-0.4324	-0.432675	0.000274998		508.933	-0.6474
Q3/2000	2000-09-30	2838.66	251.86	396.22	513.496	320.46	256.447	131847	222.264				Q3/2000	127.71	513.496	513.496	117.165	117.165	-0.000236838	3.63485	Q3/2000	3.6351	3.63485	0.000252855		513.496	3.5126
Q4/2000	2000-12-31	2846.56	258.704	399.304	509.735	318.854	257.6	133616	225.12				Q4/2000	126.78	509.735	509.735	116.312	116.307	0.00470679	-2.89769	Q4/2000	-2.8977	-2.89769	-9.39382e-06		509.735	-3.8462
Q1/2001	2001-03-31	2840.17	254.796	401.452	511.391	323.658	264.619	135343	227.448				Q1/2001	127.19	511.391	511.391	116.688	116.685	0.00300086	1.30585	Q1/2001	1.3051	1.30585	-0.0007451		511.391	0.1261
Q2/2001	2001-06-30	2831.73	263.188	400.56	502.113	327.686	268.123	129838	230.704				Q2/2001	124.88	502.113	502.113	114.569	114.568	0.00071399	-7.06195	Q2/2001	-7.0613	-7.06195	0.000653358		502.113	-7.8203
Q3/2001	2001-09-30	2794.69	257.312	401.172	493.94	325.942	271.42	128380	232.932				Q3/2001	122.85	493.94	493.94	112.706	112.703	0.00317787	-6.35363	Q3/2001	-6.3542	-6.35363	-0.000565564		493.94	-7.1415
Q4/2001	2001-12-31	2761.6	246.432	400.488	488.674	326.7	264.088	124429	234.04				Q4/2001	121.54	488.674	488.674	111.505	111.502	0.0028964	-4.19677	Q4/2001	-4.1963	-4.19677	0.000472092		488.674	-4.5428
Q1/2002	2002-03-31	2758.57	250.604	397.148	479.335	335.913	264.761	124077	237.448				Q1/2002	119.22	479.335	479.335	109.376	109.371	0.00535371	-7.428	Q1/2002	-7.4282	-7.428	-0.000197274		479.335	-8.115
Q2/2002	2002-06-30	2757.24	262.596	394.44	469.055	331.744	268.326	122181	240.768				Q2/2002	116.66	469.055	469.055	107.028	107.025	0.00233732	-8.30651	Q2/2002	-8.3063	-8.30651	0.000207761		469.055	-8.601
Q3/2002	2002-09-30	2758.43	261.156	397.4	467.3	341.139	272.535	122955	243.404				Q3/2002	116.23	467.3	467.3	106.633	106.625	0.00828365	-1.48825	Q3/2002	-1.4883	-1.48825	-5.246e-05		467.3	-0.8709
Q4/2002	2002-12-31	2755.91	276.264	400.24	464.743	350.255	273.271	122304	246.236				Q4/2002	115.59	464.743	464.743	106.046	106.041	0.00456331	-2.17084	Q4/2002	-2.1712	-2.17084	-0.000355457		464.743	-1.7006
Q1/2003	2003-03-31	2772.33	275.336	401.28	465.044	339.628	275.732	121139	253.812				Q1/2003	115.66	465.044	465.044	106.11	106.11	0.000103745	0.25932	Q1/2003	0.2592	0.25932	-0.000119709		465.044	-0.8566
Q2/2003	2003-06-30	2826.06	262.692	401.108	463.289	338.409	278.478	122603	257				Q2/2003	115.23	463.289	463.289	105.716	105.71	0.00605007	-1.50101	Q2/2003	-1.5011	-1.50101	-8.9045e-05		463.289	-0.5596
Q3/2003	2003-09-30	2910.12	262.116	408.084	463.64	337.87	287.231	120916	260.388				Q3/2003	115.32	463.64	463.64	105.798	105.79	0.00853053	0.303395	Q3/2003	0.3034	0.303395	4.84766e-06		463.64	0.7644
Q4/2003	2003-12-31	2954.34	263.196	409.324	462.787	340.689	293.762	123065	264.14				Q4/2003	115.1	462.787	462.787	105.596	105.595	0.00132633	-0.733887	Q4/2003	-0.7334	-0.733887	0.000487391		462.787	-0.3998
Q1/2004	2004-03-31	2946.21	273.484	414.144	462.399	345.158	300.631	121604	266.128				Q1/2004	115	462.399	462.399	105.505	105.506	-0.00188608	-0.334938	Q1/2004	-0.3354	-0.334938	-0.000462048		462.399	-2.9527
Q2/2004	2004-06-30	3014.74	274.732	416.12	457.835	345.444	305.377	121740	269.872				Q2/2004	113.87	457.835	457.835	104.468	104.465	0.00279337	-3.89004	Q2/2004	-3.8895	-3.89004	0.000535846		457.835	-2.7971
Q3/2004	2004-09-30	3063.42	269.732	417.636	460.293	343.208	309.818	121941	274.492				Q3/2004	114.48	460.293	460.293	105.028	105.026	0.00157979	2.16485	Q3/2004	2.1641	2.16485	-0.000754597		460.293	1.5956
Q4/2004	2004-12-31	3103.64	270.268	422.66	456.833	346.14	315.116	122974	277.964				Q4/2004	113.62	456.833	456.833	104.239	104.236	0.00206385	-2.97305	Q4/2004	-2.9731	-2.97305	-5.26916e-05		456.833	-3.2412
Q1/2005	2005-03-31	3142.56	274.364	425.156	452.068	347.69	323.672	124601	283.956				Q1/2005	112.43	452.068	452.068	103.147	103.149	-0.00244002	-4.10738	Q1/2005	-4.1066	-4.10738	0.000778413		452.068	-2.8785
Q2/2005	2005-06-30	3189.19	295.48	428.324	459.691	350.528	331.471	125257	291.572				Q2/2005	114.33	459.691	459.691	104.89	104.889	0.00132461	6.91754	Q2/2005	6.9168	6.91754	-0.000735445		459.691	6.359
Q3/2005	2005-09-30	3233.88	287.144	432.42	466.31	354.091	340.435	127546	295.632				Q3/2005	115.98	466.31	466.31	106.404	106.399	0.00481606	5.88511	Q3/2005	5.8854	5.88511	0.000285225		466.31	4.1134
Q4/2005	2005-12-31	3241.84	285.764	434.672	477.342	355.432	347.689	125955	298.748				Q4/2005	118.72	477.342	477.342	108.917	108.916	0.00138477	9.80438	Q4/2005	9.8046	9.80438	0.00021655		477.342	11.5815
Q1/2006	2006-03-31	3302.1	289.964	437.088	474.81	359.696	354.09	126059	305.636				Q1/2006	118.1	474.81	474.81	108.349	108.338	0.0103088	-2.10493	Q1/2006	-2.105	-2.10493	-7.30183e-05		474.81	-0.5932
Q2/2006	2006-06-30	3290.56	287.172	445.78	502.891	360.128	357.233	126498	312.772				Q2/2006	125.08	502.891	502.891	114.752	114.746	0.00668247	25.8392	Q2/2006	25.8387	25.8392	-0.000522116		502.891	28.6336
Q3/2006	2006-09-30	3259.63	295.24	448.556	506.401	361.016	357.16	125298	316.132				Q3/2006	125.95	506.401	506.401	115.55	115.546	0.00396412	2.82122	Q3/2006	2.8213	2.82122	7.70204e-05		506.401	1.6245
Q4/2006	2006-12-31	3234.17	300.82	456.48	522.296	374.164	359.138	127419	321.42				Q4/2006	129.91	522.296	522.296	119.183	119.173	0.0101988	13.1589	Q4/2006	13.1593	13.1589	0.000435525		522.296	13.2587
Q1/2007	2007-03-31	3229.97	304.384	464.172	521.018	372.85	364.325	127210	323.392				Q1/2007	129.58	521.018	521.018	118.881	118.882	-0.000949781	-0.975169	Q1/2007	-0.9753	-0.975169	-0.000131159		521.018	2.8651
Q2/2007	2007-06-30	3247.54	311.172	469.232	517.658	367.75	367.022	125403	329.16				Q2/2007	128.75	517.658	517.658	118.119	118.115	0.00424002	-2.55472	Q2/2007	-2.5546	-2.55472	0.000119406		517.658	-4.1893
Q3/2007	2007-09-30	3233.31	300.9	474.636	520.466	368.194	368.542	122305	327.692				Q3/2007	129.45	520.466	520.466	118.761	118.756	0.00573507	2.18749	Q3/2007	2.1876	2.18749	0.000109079		520.466	1.2862
Q4/2007	2007-12-31	3213.37	317.988	477.98	533.855	365.742	372.952	120703	330.608				Q4/2007	132.78	533.855	533.855	121.817	121.811	0.00578694	10.6939	Q4/2007	10.6939	10.6939	-2.8918e-05		533.855	13.1895
Q1/2008	2008-03-31	3166.5	301.36	484.028	536.751	369.013	381.488	121401	326.36				Q1/2008	133.5	536.751	536.751	122.477	122.472	0.00555149	2.1876	Q1/2008	2.1873	2.1876	-0.000297912		536.751	2.2354
Q2/2008	2008-06-30	3147.63	307.024	479.48	526.321	365.01	379.114	120029	324.344				Q2/2008	130.91	526.321	526.321	120.101	120.092	0.00923795	-7.54906	Q2/2008	-7.5491	-7.54906	-4.29865e-05		526.321	-9.3268
Q3/2008	2008-09-30	3074.69	285.44	475.144	527.875	354.78	375.848	119242	311.328				Q3/2008	131.29	527.875	527.875	120.45	120.446	0.00328262	1.18627	Q3/2008	1.1866	1.18627	0.000330784		527.875	-0.2449
Q4/2008	2008-12-31	2909.44	277.06	461.084	520.404	339.165	360.344	116167	297.344				Q4/2008	129.43	520.404	520.404	118.743	118.742	0.00153311	-5.54213	Q4/2008	-5.5426	-5.54213	-0.000465277		520.404	-5.2886
Q1/2009	2009-03-31	2727.46	264.704	442.196	474.22	326.864	324.047	110937	277.248				Q1/2009	117.95	474.22	474.22	108.211	108.204	0.00731553	-31.0464	Q1/2009	-31.0461	-31.0464	0.000297552		474.22	-31.6876
Q2/2009	2009-06-30	2662.19	247.524	430.54	473.97	320.843	322.503	108873	258.936				Q2/2009	117.88	473.97	473.97	108.147	108.147	0.000138327	-0.210706	Q2/2009	-0.2113	-0.210706	-0.000594103		473.97	-6.4418
Q3/2009	2009-09-30	2663.06	250.508	427.296	476.527	314.617	332.614	105641	256.736				Q3/2009	118.52	476.527	476.527	108.734	108.73	0.00385866	2.17547	Q3/2009	2.1758	2.17547	0.00033194		476.527	0.837
Q4/2009	2009-12-31	2638.15	246.992	428.54	474.822	323.366	348.287	104943	253.972				Q4/2009	118.1	474.822	474.822	108.349	108.341	0.0075707	-1.42353	Q4/2009	-1.4234	-1.42353	0.000125757		474.822	-0.1189
Q1/2010	2010-03-31	2632.87	258.048	432.84	475.261	317.792	360.57	105770	252.512				Q1/2010	118.21	475.261	475.261	108.45	108.441	0.00832066	0.370336	Q1/2010	0.3706	0.370336	0.000264004		475.261	3.0077
Q2/2010	2010-06-30	2714.08	259.004	438.02	503.944	319.779	368.251	105531	251.408				Q2/2010	125.34	503.944	503.944	114.991	114.986	0.00494953	26.4155	Q2/2010	26.4147	26.4155	-0.000822894		503.944	26.3575
Q3/2010	2010-09-30	2714.9	267.896	443.24	510.914	318.606	372.433	106345	247.408				Q3/2010	127.08	510.914	510.914	116.587	116.576	0.0109214	5.6482	Q3/2010	5.6482	5.6482	9.88081e-07		510.914	4.3771
Q4/2010	2010-12-31	2748.55	270.484	446.436	505.297	321.74	378.995	105891	244.624				Q4/2010	125.68	505.297	505.297	115.303	115.295	0.00815951	-4.32562	Q4/2010	-4.325	-4.32562	0.000617944		505.297	-4.4068
Q1/2011	2011-03-31	2720.77	267.048	446.68	530.721	318.49	383.02	106665	238.688				Q1/2011	132	530.721	530.721	121.101	121.096	0.00528145	21.6965	Q1/2011	21.6963	21.6965	-0.000234382		530.721	24.5847
Q2/2011	2011-06-30	2759.51	264.528	447.92	534.482	315.021	386.329	106035	233.796				Q2/2011	132.94	534.482	534.482	121.963	121.954	0.00951213	2.86491	Q2/2011	2.8647	2.86491	-0.000208821		534.482	-0.3862
Q3/2011	2011-09-30	2839.96	270.68	448.472	539.346	311.686	387.873	107873	229.572				Q3/2011	134.15	539.346	539.346	123.073	123.064	0.0097756	3.69015	Q3/2011	3.6901	3.69015	-5.25277e-05		539.346	1.629
Q4/2011	2011-12-31	2889.76	276.036	455.896	537.591	311.305	391.674	109978	224.8				Q4/2011	133.71	537.591	537.591	122.67	122.663	0.00654761	-1.29524	Q4/2011	-1.2952	-1.29524	3.72449e-05		537.591	2.0133
Q1/2012	2012-03-31	2951.22	277.12	452.148	538.205	291.288	402.64	111213	218.984				Q1/2012	133.86	538.205	538.205	122.807	122.803	0.00406473	0.457636	Q1/2012	0.4578	0.457636	0.000163838		538.205	-1.6983
Q2/2012	2012-06-30	2986.18	272.036	450.98	534.495	286.701	406.778	112036	213.756				Q2/2012	132.94	534.495	534.495	121.963	121.957	0.0065459	-2.72893	Q2/2012	-2.7294	-2.72893	-0.000465962		534.495	-6.5917
Q3/2012	2012-09-30	2974.82	268.988	451.696	536.801	283.062	406.12	111233	208.544				Q3/2012	133.51	536.801	536.801	122.486	122.483	0.0033172	1.73694	Q3/2012	1.7374	1.73694	0.000458539		536.801	-0.2848
Q4/2012	2012-12-31	3001.11	282.508	450.064	531.335	277.722	409.077	111326	205.772				Q4/2012	132.15	531.335	531.335	121.239	121.236	0.00279856	-4.01123	Q4/2012	-4.0111	-4.01123	0.000128454		531.335	-2.6827
Q1/2013	2013-03-31	3034.1	270.156	446.868	512.858	268.999	410.627	112096	204.716				Q1/2013	127.56	512.858	512.858	117.028	117.02	0.00772218	-13.201	Q1/2013	-13.2014	-13.201	-0.000423462		512.858	-5.5616
Q2/2013	2013-06-30	3056.36	281.192	447.74	529.655	267.97	410.526	115500	202.528				Q2/2013	131.74	529.655	529.655	120.862	120.852	0.00998062	13.7585	Q2/2013	13.7591	13.7585	0.000623262		529.655	5.0081
Q3/2013	2013-09-30	3076.13	292.676	448.048	531.862	266.115	411.315	118952	205.304				Q3/2013	132.29	531.862	531.862	121.367	121.356	0.0109923	1.67719	Q3/2013	1.6767	1.67719	-0.000491954		531.862	5.2075
Q4/2013	2013-12-31	3110.07	294.224	450.224	541.69	260.158	413.003	121245	205.32				Q4/2013	134.73	541.69	541.69	123.606	123.598	0.00705068	7.5988	Q4/2013	7.5987	7.5988	-9.89584e-05		541.69	5.658
Q1/2014	2014-03-31	3130.23	300.44	448.088	553.048	261.802	413.992	123358	212.548				Q1/2014	137.55	553.048	553.048	126.193	126.19	0.00262984	8.65458	Q1/2014	8.6549	8.65458	0.000321496		553.048	8.3158
Q2/2014	2014-06-30	3203.18	304.428	447.768	546.529	258.851	417.75	118993	213.92				Q2/2014	135.93	546.529	546.529	124.706	124.703	0.00384413	-4.63225	Q2/2014	-4.6321	-4.63225	0.000148899		546.529	3.9196
Q3/2014	2014-09-30	3262.66	307.896	449.644	543.721	258.105	423.491	119330	214.216				Q3/2014	135.23	543.721	543.721	124.064	124.062	0.00234908	-2.03937	Q3/2014	-2.0394	-2.03937	-3.28063e-05		543.721	4.5346
Q4/2014	2014-12-31	3268.57	306.176	447.728	551.193	261.314	429.248	120400	215.528				Q4/2014	137.09	551.193	551.193	125.771	125.767	0.00387042	5.61129	Q4/2014	5.611	5.61129	-0.000289702		551.193	4.6791
Q1/2015	2015-03-31	3289.17	314.836	449.968	548.084	262.352	410.47	123019	223.156				Q1/2015	136.32	548.084	548.084	125.064	125.057	0.00683494	-2.23718	Q1/2015	-2.2371	-2.23718	7.95991e-05		548.084	4.8158
Q2/2015	2015-06-30	3336.07	319.208	447.98	548.334	264.467	400.86	121980	228.112				Q2/2015	136.38	548.334	548.334	125.119	125.114	0.00483783	0.182579	Q2/2015	0.1831	0.182579	0.000521342		548.334	4.9518
Q3/2015	2015-09-30	3359.4	309.172	452.656	552.898	265.928	393.893	122682	229.468				Q3/2015	137.52	552.898	552.898	126.165	126.156	0.00933269	3.37116	Q3/2015	3.3706	3.37116	-0.000556122		552.898	5.0567
Q4/2015	2015-12-31	3335.46	309.54	458.148	566.738	266.979	392.598	122618	231.208				Q4/2015	140.96	566.738	566.738	129.321	129.314	0.00739645	10.395	Q4/2015	10.3949	10.395	-6.26937e-05		566.738	5.0579
Q1/2016	2016-03-31	3344.98	311.852	462.928	573.808	269.768	389.292	122733	232.676				Q1/2016	142.72	573.808	573.808	130.936	130.927	0.00889979	5.08411	Q1/2016	5.0844	5.08411	0.000287056
Q2/2016	2016-06-30	3343.35	318.04	463.296	566.888	269.149	387.657	123982	236.352				Q2/2016	140.99	566.888	566.888	129.349	129.348	0.000693601	-4.73735	Q2/2016	-4.7373	-4.73735	4.96716e-05
Q3/2016	2016-09-30	3346.61	321.52	464.644	569.746	274.679	389.6	124079	235.744				Q3/2016	141.71	569.746	569.746	130.009	130	0.00912868	2.03193	Q3/2016	2.0321	2.03193	0.000174185
Q4/2016	2016-12-31	3363.41	323.704	467.14	569.646	281.445	384.101	124911	237.536				Q4/2016	141.68	569.646	569.646	129.982	129.977	0.00442293	-0.0701882	Q4/2016	-0.0704	-0.0701882	-0.000211758
Q1/2017	2017-03-31	3423.91	325.82	475.208	584.589	275.62	391.783	125542	244.1				Q1/2017	145.4	584.589	584.589	133.394	133.387	0.00769379	10.913	Q1/2017	10.9132	10.913	0.000226665
Q2/2017	2017-06-30	3442.67	331.296	479.556	593.365	279.882	394.615	127606	245.616				Q2/2017	147.56	593.365	593.365	135.376	135.389	-0.0130917	6.14148	Q2/2017	6.141	6.14148	-0.000481687
Q3/2017	2017-09-30	3454.93	332.968	483.76	595.922	288.794	399.028	127426	248.996				Q3/2017	148.22	595.922	595.922	135.982	135.973	0.00897725	1.7349	Q3/2017	1.7351	1.7349	0.000197581
Q4/2017	2017-12-31	3527.12	336.532	489.292	596.123	293.83	408.291	127407	250.812				Q4/2017	148.59	596.123	596.123	136.321	136.019	0.302564	0.134985	Q4/2017	0.1347	0.134985	-0.000285261
Q1/2018	2018-03-31	3562.32	339.676	492.252	604.11	296.21	410.271	127011	253.922				Q1/2018	151.07	604.11	604.11	138.596	137.841	0.755384	5.46797	Q1/2018	5.4684	5.46797	0.000430332
Q2/2018	2018-06-30	3613.43	340.513	497.033	610.191	298.624	413.554	128573	256.842				Q2/2018		610.191	610.191		139.228	-139.228	4.08762	Q2/2018	4.0878	4.08762	0.000176777
Q3/2018	2018-09-30	3655	341.254	501.983	616.285	301.057	416.932	129218	259.796				Q3/2018		616.285	616.285		140.619	-140.619	4.05506	Q3/2018	4.055	4.05506	-5.87226e-05
Q4/2018	2018-12-31	3697.06	341.941	506.949	622.464	303.511	420.349	129283	262.784				Q4/2018		622.464	622.464		142.029	-142.029	4.0712	Q4/2018	4.0708	4.0712	-0.000401204
Q1/2019	2019-03-31	3738.85	342.551	511.913	628.386	305.762	423.816	129444	265.49				Q1/2019		628.386	628.386		143.38	-143.38	3.86017	Q1/2019	3.8605	3.86017	0.00032598
Q2/2019	2019-06-30	3781.12	343.052	516.876	634.406	308.03	427.055	129543	268.145				Q2/2019		634.406	634.406		144.754	-144.754	3.88746	Q2/2019	3.8875	3.88746	4.09406e-05
Q3/2019	2019-09-30	3823.87	343.47	521.846	640.304	310.315	430.164	129351	270.827				Q3/2019		640.304	640.304		146.099	-146.099	3.77094	Q3/2019	3.771	3.77094	6.4348e-05
Q4/2019	2019-12-31	3867.11	343.892	526.801	646.258	312.616	433.246	128814	273.535				Q4/2019		646.258	646.258		147.458	-147.458	3.77169	Q4/2019	3.7717	3.77169	1.48146e-05

## Sheet: Housing Investment
Q1/1960 !Q mag=bil	.excel_last	Q111IHC@OUTLOOK	Q112IHC@OUTLOOK	Q132ihc@OUTLOOK		Q136ihc@OUTLOOK	Q156ihc@OUTLOOK	Q158ihc@OUTLOOK	Q184ihc@OUTLOOK				GERMANY	Q1/1960 !Q mag=bil	Q134IC@OUTLOOK	Q134IBGV@OUTLOOK	Q134ihc@OUTLOOK			Comparison		Comparison				Q1/1960 !Q	Q134ICP@OUTLOOK		Comparison			(Q134IBGV@OUTLOOK) - historical	(Q134ICP@OUTLOOK) - historical	Germany: Gross Fixed Capital Formation, Housing, Volume(Bil.Ch.2005.EUR)
.DESC		US: Gross Fixed Capital Formation, Housing, Vol(SAAR,Bil.Chn.2009.US$)	UK: Gross Fixed Capital Formation, Housing, Volume(SAAR,Bil.Chn.2015.Pound)	France: Gross Fixed Capital Formation, Housing, Volume(SAAR,Bil.Chn.2010.Euro)	Germany: Gross Fixed Capital Formation, Housing, Volume(Bil.Ch.2010.EUR)	Italy: Gross Fixed Capital Formation, Housing, Volume(SAAR,Bil.Chn.2010.Euro)	Canada: Gross Fixed Capital Formation, Housing, Volume(SAAR,Bil.Chn.2007.C$)	Japan: Gross Fixed Capital Formation, Housing, Volume(SAAR,Bil.Chn.2011.Yen)	Spain: Gross Fixed Capital Formation, Housing, Volume(SAAR,Bil.Chn.2010.Euro)					.DESC	Germany: Gross Fixed Capital Formation, Total, Volume(SAAR,Bil.Chn.2010.Euro)	Germany: Private Non-Res & Gov Fixed Capital Form, Vol(SAAR,Bil.Chn.2010.Euro)	Germany: Gross Fixed Capital Formation, Housing, Volume(SAAR,Bil.Chn.2010.Euro)	Germany: Gross Fixed Capital Formation, Total, Volume(Bil.Ch.2005.EUR)		Comparison	Germany: Gross Fixed Capital Formation, Housing, Volume(Bil.Ch.2010.EUR)					.DESC	Germany: Gross Fixed Capital Formation Growth, Volume (Annualized % Change)					Germany:Private Non-Residential&Govt Fixed Capital Form,Volume(Bil.Ch.2005.EUR)	Germany: Gross Fixed Capital Formation Growth, Volume(Annualized % Change)
.T1		Q1-1960	Q1-1966	Q1-1960	Q1-1960	Q1-1960	Q1-1960	Q1-1960	Q1-1960					.T1	Q1-1991	Q1-1960	Q1-1991									.T1	Q2-1991					Q1-1960	Q2-1960
.TN		Q4-2019	Q4-2019	Q4-2019	Q4-2019	Q4-2019	Q4-2019	Q4-2019	Q4-2019					.TN	Q4-2019	Q4-2019	Q4-2019									.TN	Q4-2019					Q4-2015	Q4-2015
.LSOURCE		Organization for Economic Cooperation & Development	Organization for Economic Cooperation & Development	Organization for Economic Cooperation & Development	Organization for Economic Cooperation & Devt	Organization for Economic Cooperation & Development	Organization for Economic Cooperation & Development	Organization for Economic Cooperation & Development	Organization for Economic Cooperation & Development					.LSOURCE	Organization for Economic Cooperation & Development	Organization for Economic Cooperation & Development	Organization for Economic Cooperation & Development									.LSOURCE	Organization for Economic Cooperation & Development				Historical Germany Series	Organization for Economic Cooperation & Devt	Organization for Economic Cooperation & Devt
.DTLM		May-30-2018 07:53	May-30-2018 09:03	May-30-2018 07:53		May-30-2018 07:53	May-30-2018 07:53	May-30-2018 07:53	May-30-2018 07:53					.DTLM	May-30-2018 07:53	May-30-2018 07:53	May-30-2018 07:53									.DTLM	May-30-2018 07:53					May-09-2014 15:38	May-09-2014 15:38
Q1/1960	1960-03-31	242.73	#N/A	30.396	54.1464	46.361	26.885	3143	16.136					Q1/1960	#N/A	#N/A	#N/A	#N/A			#N/A	#N/A				Q1/1960	#N/A				78.4714	114.687	#N/A	193.159
Q2/1960	1960-06-30	222.768	#N/A	30.835	52.9869	46.871	23.189	3165	16.182					Q2/1960	#N/A	#N/A	#N/A	#N/A	#N/A	#N/A	#N/A	#N/A				Q2/1960	#N/A				76.791	117.285	1.9135	194.076
Q3/1960	1960-09-30	216.013	#N/A	31.561	52.9559	47.816	22.594	3319	16.612					Q3/1960	#N/A	#N/A	#N/A	#N/A	#N/A	#N/A	#N/A	#N/A				Q3/1960	#N/A				76.7462	119.165	3.8359	195.911
Q4/1960	1960-12-31	215.72	#N/A	32.519	52.989	49.132	23.291	3337	17.506					Q4/1960	#N/A	#N/A	#N/A	#N/A	#N/A	#N/A	#N/A	#N/A				Q4/1960	#N/A				76.7941	122.195	6.4352	198.989
Q1/1961	1961-03-31	216.556	#N/A	33.69	52.6471	49.015	23.024	3726	18.864					Q1/1961	#N/A	#N/A	#N/A	#N/A	#N/A	#N/A	#N/A	#N/A				Q1/1961	#N/A				76.2987	127.013	8.9751	203.311
Q2/1961	1961-06-30	217.334	#N/A	34.615	55.3587	50.877	23.641	3517	19.813					Q2/1961	#N/A	#N/A	#N/A	#N/A	#N/A	#N/A	#N/A	#N/A				Q2/1961	#N/A				80.2284	126.692	7.2924	206.921
Q3/1961	1961-09-30	229.078	#N/A	35.255	57.1148	52.892	24.548	3564	20.355					Q3/1961	#N/A	#N/A	#N/A	#N/A	#N/A	#N/A	#N/A	#N/A				Q3/1961	#N/A				82.7735	127.044	5.7181	209.817
Q4/1961	1961-12-31	236.759	#N/A	35.613	57.2311	54.969	23.724	3822	20.557					Q4/1961	#N/A	#N/A	#N/A	#N/A	#N/A	#N/A	#N/A	#N/A				Q4/1961	#N/A				82.942	129.453	5.0044	212.395
Q1/1962	1962-03-31	241.024	#N/A	35.708	56.3517	57.115	23.636	4085	20.417					Q1/1962	#N/A	#N/A	#N/A	#N/A	#N/A	#N/A	#N/A	#N/A				Q1/1962	#N/A				81.6675	132.985	4.3203	214.652
Q2/1962	1962-06-30	248.572	#N/A	35.728	56.9736	59.064	23.931	4190	20.406					Q2/1962	#N/A	#N/A	#N/A	#N/A	#N/A	#N/A	#N/A	#N/A				Q2/1962	#N/A				82.5688	133.618	2.8908	216.187
Q3/1962	1962-09-30	248.361	#N/A	35.707	57.3761	60.912	25.3	4272	20.525					Q3/1962	#N/A	#N/A	#N/A	#N/A	#N/A	#N/A	#N/A	#N/A				Q3/1962	#N/A				83.152	133.847	1.5105	216.999
Q4/1962	1962-12-31	248.035	#N/A	35.678	56.4191	62.676	24.632	4362	20.673					Q4/1962	#N/A	#N/A	#N/A	#N/A	#N/A	#N/A	#N/A	#N/A				Q4/1962	#N/A				81.7652	134.723	-0.9381	216.488
Q1/1963	1963-03-31	257.001	#N/A	36.99	62.162	65.099	23.815	4302	20.852					Q1/1963	#N/A	#N/A	#N/A	#N/A	#N/A	#N/A	#N/A	#N/A				Q1/1963	#N/A				90.088	124.567	-3.3445	214.655
Q2/1963	1963-06-30	275.486	#N/A	38.349	54.4539	66.711	24.709	4770	21.185					Q2/1963	#N/A	#N/A	#N/A	#N/A	#N/A	#N/A	#N/A	#N/A				Q2/1963	#N/A				78.9171	136.583	1.584	215.5
Q3/1963	1963-09-30	280.581	#N/A	42.616	54.456	68.062	24.881	5266	21.673					Q3/1963	#N/A	#N/A	#N/A	#N/A	#N/A	#N/A	#N/A	#N/A				Q3/1963	#N/A				78.9202	140.103	6.7019	219.023
Q4/1963	1963-12-31	289.124	#N/A	40.088	56.8943	68.937	27.5	5663	22.333					Q4/1963	#N/A	#N/A	#N/A	#N/A	#N/A	#N/A	#N/A	#N/A				Q4/1963	#N/A				82.4538	142.932	12.1361	225.386
Q1/1964	1964-03-31	306.837	#N/A	42.203	61.4667	72.632	28.791	6040	23.163					Q1/1964	#N/A	#N/A	#N/A	#N/A	#N/A	#N/A	#N/A	#N/A				Q1/1964	#N/A				89.0804	145.507	17.3585	234.588
Q2/1964	1964-06-30	291.391	#N/A	42.972	62.5515	72.005	27.901	6042	23.942					Q2/1964	#N/A	#N/A	#N/A	#N/A	#N/A	#N/A	#N/A	#N/A				Q2/1964	#N/A				90.6525	151.01	12.6195	241.662
Q3/1964	1964-09-30	286.628	#N/A	44.756	64.8423	70.824	28.588	6293	24.667					Q3/1964	#N/A	#N/A	#N/A	#N/A	#N/A	#N/A	#N/A	#N/A				Q3/1964	#N/A				93.9725	152.637	8.4433	246.609
Q4/1964	1964-12-31	281.404	#N/A	46.76	64.9574	69.437	31.154	6745	25.407					Q4/1964	#N/A	#N/A	#N/A	#N/A	#N/A	#N/A	#N/A	#N/A				Q4/1964	#N/A				94.1393	155.844	5.5868	249.984
Q1/1965	1965-03-31	282.382	#N/A	47.16	65.8695	67.583	30.471	7010	26.16					Q1/1965	#N/A	#N/A	#N/A	#N/A	#N/A	#N/A	#N/A	#N/A				Q1/1965	#N/A				95.4611	156.324	2.9146	251.786
Q2/1965	1965-06-30	284.59	#N/A	48.323	65.8183	66.771	30.14	7485	26.753					Q2/1965	#N/A	#N/A	#N/A	#N/A	#N/A	#N/A	#N/A	#N/A				Q2/1965	#N/A				95.387	158.266	2.9992	253.653
Q3/1965	1965-09-30	285.708	#N/A	48.476	66.1029	66.398	30.653	7761	27.187					Q3/1965	#N/A	#N/A	#N/A	#N/A	#N/A	#N/A	#N/A	#N/A				Q3/1965	#N/A				95.7994	159.785	3.0818	255.585
Q4/1965	1965-12-31	279.521	#N/A	52.753	67.1725	66.406	30.025	8064	27.373					Q4/1965	#N/A	#N/A	#N/A	#N/A	#N/A	#N/A	#N/A	#N/A				Q4/1965	#N/A				97.3494	160.392	3.4189	257.742
Q1/1966	1966-03-31	285.868	41.15	53.26	66.6374	64.812	30.167	7654	27.313					Q1/1966	#N/A	#N/A	#N/A	#N/A	#N/A	#N/A	#N/A	#N/A				Q1/1966	#N/A				96.5741	163.55	3.7485	260.124
Q2/1966	1966-06-30	262.939	39.783	54.94	67.6887	65.414	31.037	8086	27.704					Q2/1966	#N/A	#N/A	#N/A	#N/A	#N/A	#N/A	#N/A	#N/A				Q2/1966	#N/A				98.0976	162.036	0.0151	260.134
Q3/1966	1966-09-30	254.389	39.921	54.715	68.9006	66.252	27.698	8298	28.548					Q3/1966	#N/A	#N/A	#N/A	#N/A	#N/A	#N/A	#N/A	#N/A				Q3/1966	#N/A				99.854	157.917	-3.5836	257.771
Q4/1966	1966-12-31	227.699	38.887	54.417	68.4008	67.299	27.161	8090	29.777					Q4/1966	#N/A	#N/A	#N/A	#N/A	#N/A	#N/A	#N/A	#N/A				Q4/1966	#N/A				99.1296	153.306	-8.0258	252.436
Q1/1967	1967-03-31	220.854	38.376	56.164	68.1101	67.17	28.159	8826	31.393					Q1/1967	#N/A	#N/A	#N/A	#N/A	#N/A	#N/A	#N/A	#N/A				Q1/1967	#N/A				98.7082	145.419	-12.5292	244.127
Q2/1967	1967-06-30	245.96	40.607	57.913	66.6295	68.583	28.756	9332	33.091					Q2/1967	#N/A	#N/A	#N/A	#N/A	#N/A	#N/A	#N/A	#N/A				Q2/1967	#N/A				96.5625	142.484	-8.0683	239.047
Q3/1967	1967-09-30	258.291	41.49	59.631	66.2136	70.32	30.769	9576	34.873					Q3/1967	#N/A	#N/A	#N/A	#N/A	#N/A	#N/A	#N/A	#N/A				Q3/1967	#N/A				95.9597	141.234	-3.0647	237.194
Q4/1967	1967-12-31	273.34	42.503	60.065	62.1837	72.555	30.811	10548	36.99					Q4/1967	#N/A	#N/A	#N/A	#N/A	#N/A	#N/A	#N/A	#N/A				Q4/1967	#N/A				90.1196	147.73	1.1109	237.85
Q1/1968	1968-03-31	275.006	46.869	62.673	69.3251	72.676	31.211	11039	39.442					Q1/1968	#N/A	#N/A	#N/A	#N/A	#N/A	#N/A	#N/A	#N/A				Q1/1968	#N/A				100.469	145.226	13.8613	245.695
Q2/1968	1968-06-30	281.954	47.621	62.696	64.186	76.271	33.934	11206	41.022					Q2/1968	#N/A	#N/A	#N/A	#N/A	#N/A	#N/A	#N/A	#N/A				Q2/1968	#N/A				93.0213	146.815	-9.203	239.836
Q3/1968	1968-09-30	287.018	51.927	65.223	64.334	79.939	33.397	11034	41.73					Q3/1968	#N/A	#N/A	#N/A	#N/A	#N/A	#N/A	#N/A	#N/A				Q3/1968	#N/A				93.2358	152.381	9.9956	245.617
Q4/1968	1968-12-31	290.593	55.682	64.908	67.5854	82.91	36.172	12478	41.596					Q4/1968	#N/A	#N/A	#N/A	#N/A	#N/A	#N/A	#N/A	#N/A				Q4/1968	#N/A				97.9478	160.711	22.9912	258.659
Q1/1969	1969-03-31	301.059	49.462	64.595	70.3252	91.539	37.123	12133	40.62					Q1/1969	#N/A	#N/A	#N/A	#N/A	#N/A	#N/A	#N/A	#N/A				Q1/1969	#N/A				101.919	163.335	10.595	265.253
Q2/1969	1969-06-30	297.821	47.928	65.638	68.2322	91.076	38.99	12962	39.831					Q2/1969	#N/A	#N/A	#N/A	#N/A	#N/A	#N/A	#N/A	#N/A				Q2/1969	#N/A				98.8852	169.459	4.7437	268.345
Q3/1969	1969-09-30	295.395	49.633	67.75	68.306	89.238	38.473	14024	39.23					Q3/1969	#N/A	#N/A	#N/A	#N/A	#N/A	#N/A	#N/A	#N/A				Q3/1969	#N/A				98.9922	176.815	11.5961	275.807
Q4/1969	1969-12-31	273.793	50.115	73.093	68.2535	86.89	37.828	14296	38.65					Q4/1969	#N/A	#N/A	#N/A	#N/A	#N/A	#N/A	#N/A	#N/A				Q4/1969	#N/A				98.9161	176.176	-1.0331	275.092
Q1/1970	1970-03-31	274.336	48.854	70.517	71.795	82.93	36.691	14956	38.092					Q1/1970	#N/A	#N/A	#N/A	#N/A	#N/A	#N/A	#N/A	#N/A				Q1/1970	#N/A				104.049	166.808	-6.018	270.856
Q2/1970	1970-06-30	256.055	48.933	73.042	67.6298	83.07	32.538	15192	37.521					Q2/1970	#N/A	#N/A	#N/A	#N/A	#N/A	#N/A	#N/A	#N/A				Q2/1970	#N/A				98.0122	195.093	37.1327	293.106
Q3/1970	1970-09-30	269.694	50.994	75.312	70.6855	83.156	33.947	15149	36.937					Q3/1970	#N/A	#N/A	#N/A	#N/A	#N/A	#N/A	#N/A	#N/A				Q3/1970	#N/A				102.441	206.386	23.2433	308.827
Q4/1970	1970-12-31	298.121	53.973	72.858	75.0016	83.019	36.735	15201	36.237					Q4/1970	#N/A	#N/A	#N/A	#N/A	#N/A	#N/A	#N/A	#N/A				Q4/1970	#N/A				108.696	200.042	-0.115	308.738
Q1/1971	1971-03-31	314.039	54.775	78.946	76.9729	82.657	36.804	15718	35.422					Q1/1971	#N/A	#N/A	#N/A	#N/A	#N/A	#N/A	#N/A	#N/A				Q1/1971	#N/A				111.553	192.578	-5.8375	304.13
Q2/1971	1971-06-30	345.73	61.849	78.437	82.5814	82.701	39.804	15685	35.141					Q2/1971	#N/A	#N/A	#N/A	#N/A	#N/A	#N/A	#N/A	#N/A				Q2/1971	#N/A				119.681	195.153	14.8377	314.833
Q3/1971	1971-09-30	362.765	66.428	77.376	85.0751	82.05	41.514	15765	35.394					Q3/1971	#N/A	#N/A	#N/A	#N/A	#N/A	#N/A	#N/A	#N/A				Q3/1971	#N/A				123.295	191.316	-0.2819	314.611
Q4/1971	1971-12-31	376.826	68.688	77.518	91.7929	81.403	42.632	16185	36.173					Q4/1971	#N/A	#N/A	#N/A	#N/A	#N/A	#N/A	#N/A	#N/A				Q4/1971	#N/A				133.03	182.158	0.7362	315.189
Q1/1972	1972-03-31	401.958	70.01	81.38	95.167	80.541	43.327	17195	37.479					Q1/1972	#N/A	#N/A	#N/A	#N/A	#N/A	#N/A	#N/A	#N/A				Q1/1972	#N/A				137.92	177.734	0.593	315.655
Q2/1972	1972-06-30	409.838	74.177	83.115	98.8877	79.628	44.217	18434	38.71					Q2/1972	#N/A	#N/A	#N/A	#N/A	#N/A	#N/A	#N/A	#N/A				Q2/1972	#N/A				143.313	172.92	0.7337	316.232
Q3/1972	1972-09-30	410.795	75.231	84.901	103.085	80.226	44.33	19432	39.866					Q3/1972	#N/A	#N/A	#N/A	#N/A	#N/A	#N/A	#N/A	#N/A				Q3/1972	#N/A				149.395	173.721	8.995	323.116
Q4/1972	1972-12-31	425.475	72.593	86.765	106.735	80.133	43.803	19724	41.102					Q4/1972	#N/A	#N/A	#N/A	#N/A	#N/A	#N/A	#N/A	#N/A				Q4/1972	#N/A				154.685	171.85	4.3008	326.535
Q1/1973	1973-03-31	439.758	72.225	88.472	106.227	79.333	46.393	20476	42.418					Q1/1973	#N/A	#N/A	#N/A	#N/A	#N/A	#N/A	#N/A	#N/A				Q1/1973	#N/A				153.949	176.694	5.1284	330.643
Q2/1973	1973-06-30	417.405	68.933	91.041	107.78	78.955	47.328	21542	43.486					Q2/1973	#N/A	#N/A	#N/A	#N/A	#N/A	#N/A	#N/A	#N/A				Q2/1973	#N/A				156.2	169.292	-6.0882	325.492
Q3/1973	1973-09-30	399.711	63.745	93.14	103.309	78.855	46.456	21473	44.306					Q3/1973	#N/A	#N/A	#N/A	#N/A	#N/A	#N/A	#N/A	#N/A				Q3/1973	#N/A				149.721	171.818	-4.7696	321.539
Q4/1973	1973-12-31	380.606	61.933	95.366	97.5572	79.567	47.968	22730	44.985					Q4/1973	#N/A	#N/A	#N/A	#N/A	#N/A	#N/A	#N/A	#N/A				Q4/1973	#N/A				141.384	171.05	-10.854	312.435
Q1/1974	1974-03-31	352.709	57.735	97.737	84.8663	80.234	52.103	20992	45.524					Q1/1974	#N/A	#N/A	#N/A	#N/A	#N/A	#N/A	#N/A	#N/A				Q1/1974	#N/A				122.992	189.52	0.0999	312.513
Q2/1974	1974-06-30	337.307	55.249	97.813	81.5797	80.569	48.166	17219	45.603					Q2/1974	#N/A	#N/A	#N/A	#N/A	#N/A	#N/A	#N/A	#N/A				Q2/1974	#N/A				118.229	176.697	-20.6798	294.926
Q3/1974	1974-09-30	326.178	48.321	97.386	74.7087	80.722	45.447	18705	45.224					Q3/1974	#N/A	#N/A	#N/A	#N/A	#N/A	#N/A	#N/A	#N/A				Q3/1974	#N/A				108.271	181.859	-6.3481	290.13
Q4/1974	1974-12-31	283.256	50.123	95.708	71.8622	79.282	42.871	18687	44.25					Q4/1974	#N/A	#N/A	#N/A	#N/A	#N/A	#N/A	#N/A	#N/A				Q4/1974	#N/A				104.146	181.854	-5.5737	286
Q1/1975	1975-03-31	265.76	49.815	92.881	71.267	78.153	41.675	16862	42.679					Q1/1975	#N/A	#N/A	#N/A	#N/A	#N/A	#N/A	#N/A	#N/A				Q1/1975	#N/A				103.283	191.465	12.809	294.749
Q2/1975	1975-06-30	271.476	49.534	90.493	64.1749	77.586	43.162	19171	41.652					Q2/1975	#N/A	#N/A	#N/A	#N/A	#N/A	#N/A	#N/A	#N/A				Q2/1975	#N/A				93.0052	176.696	-29.8987	269.702
Q3/1975	1975-09-30	290.396	46.081	89.117	66.5031	77.041	48.471	20014	41.17					Q3/1975	#N/A	#N/A	#N/A	#N/A	#N/A	#N/A	#N/A	#N/A				Q3/1975	#N/A				96.3794	182.026	13.5481	278.406
Q4/1975	1975-12-31	303.115	43.352	88.58	71.8848	74.74	51.033	20453	41.162					Q4/1975	#N/A	#N/A	#N/A	#N/A	#N/A	#N/A	#N/A	#N/A				Q4/1975	#N/A				104.179	183.642	14.2286	287.821
Q1/1976	1976-03-31	334.095	49.101	88.592	71.2153	71.852	52.817	21317	41.627					Q1/1976	#N/A	#N/A	#N/A	#N/A	#N/A	#N/A	#N/A	#N/A				Q1/1976	#N/A				103.208	181.848	-3.7867	285.056
Q2/1976	1976-06-30	343.699	47.058	91.426	72.2234	70.378	57.126	20638	41.848					Q2/1976	#N/A	#N/A	#N/A	#N/A	#N/A	#N/A	#N/A	#N/A				Q2/1976	#N/A				104.67	184.872	6.4439	289.542
Q3/1976	1976-09-30	338.08	46.037	89.418	73.6375	70.249	58.045	21221	41.823					Q3/1976	#N/A	#N/A	#N/A	#N/A	#N/A	#N/A	#N/A	#N/A				Q3/1976	#N/A				106.719	178.782	-5.467	285.501
Q4/1976	1976-12-31	381.155	48.54	90.547	79.2475	70.566	55.913	20003	41.664					Q4/1976	#N/A	#N/A	#N/A	#N/A	#N/A	#N/A	#N/A	#N/A				Q4/1976	#N/A				114.849	181.62	16.2764	296.469
Q1/1977	1977-03-31	392.668	49.577	88.918	82.3352	71.093	56.448	21348	41.372					Q1/1977	#N/A	#N/A	#N/A	#N/A	#N/A	#N/A	#N/A	#N/A				Q1/1977	#N/A				119.324	188.526	16.2614	307.85
Q2/1977	1977-06-30	437.595	53.893	89.392	80.7009	71.151	56.994	20665	40.995					Q2/1977	#N/A	#N/A	#N/A	#N/A	#N/A	#N/A	#N/A	#N/A				Q2/1977	#N/A				116.955	181.968	-11.1036	298.923
Q3/1977	1977-09-30	436.215	55.699	89.933	81.1533	70.598	57.314	20227	40.535					Q3/1977	#N/A	#N/A	#N/A	#N/A	#N/A	#N/A	#N/A	#N/A				Q3/1977	#N/A				117.611	183.222	2.58	300.833
Q4/1977	1977-12-31	430.468	58.779	90.725	80.7921	70.357	56.728	21389	39.967					Q4/1977	#N/A	#N/A	#N/A	#N/A	#N/A	#N/A	#N/A	#N/A				Q4/1977	#N/A				117.088	188.319	6.2221	305.407
Q1/1978	1978-03-31	432.607	64.061	94.17	83.4965	70.402	57.223	22639	39.293					Q1/1978	#N/A	#N/A	#N/A	#N/A	#N/A	#N/A	#N/A	#N/A				Q1/1978	#N/A				121.007	193.027	11.7861	314.034
Q2/1978	1978-06-30	453.398	63.828	95.174	82.2633	70.142	58.125	22039	38.597					Q2/1978	#N/A	#N/A	#N/A	#N/A	#N/A	#N/A	#N/A	#N/A				Q2/1978	#N/A				119.22	191.749	-3.8465	310.969
Q3/1978	1978-09-30	459.7	66.457	96.947	85.7331	70.523	57.419	21622	37.879					Q3/1978	#N/A	#N/A	#N/A	#N/A	#N/A	#N/A	#N/A	#N/A				Q3/1978	#N/A				124.248	199.378	17.3023	323.626
Q4/1978	1978-12-31	458.085	69.114	97.885	86.1767	71.258	57.345	21973	37.076					Q4/1978	#N/A	#N/A	#N/A	#N/A	#N/A	#N/A	#N/A	#N/A				Q4/1978	#N/A				124.891	200.379	2.0466	325.27
Q1/1979	1979-03-31	447.371	74.217	98.371	87.5709	71.79	57.277	21054	36.187					Q1/1979	#N/A	#N/A	#N/A	#N/A	#N/A	#N/A	#N/A	#N/A				Q1/1979	#N/A				126.912	190.551	-9.2602	317.463
Q2/1979	1979-06-30	439.025	76.991	97.961	93.8684	72.293	56.336	22375	35.511					Q2/1979	#N/A	#N/A	#N/A	#N/A	#N/A	#N/A	#N/A	#N/A				Q2/1979	#N/A				136.038	207.362	36.9081	343.4
Q3/1979	1979-09-30	433.802	77.993	98.757	93.7068	72.435	57.772	22756	35.047					Q3/1979	#N/A	#N/A	#N/A	#N/A	#N/A	#N/A	#N/A	#N/A				Q3/1979	#N/A				135.804	209.639	2.4011	345.443
Q4/1979	1979-12-31	417.405	83.444	99.921	95.4153	74.451	57.641	21318	34.782					Q4/1979	#N/A	#N/A	#N/A	#N/A	#N/A	#N/A	#N/A	#N/A				Q4/1979	#N/A				138.28	211.426	5.0291	349.707
Q1/1980	1980-03-31	385.49	77.646	101.281	97.3147	76.382	56.409	20524	35.113					Q1/1980	#N/A	#N/A	#N/A	#N/A	#N/A	#N/A	#N/A	#N/A				Q1/1980	#N/A				141.033	214.658	7.0222	355.691
Q2/1980	1980-06-30	314.155	72.167	99.927	99.6393	76.667	51.131	20256	34.456					Q2/1980	#N/A	#N/A	#N/A	#N/A	#N/A	#N/A	#N/A	#N/A				Q2/1980	#N/A				144.402	205.16	-6.7161	349.562
Q3/1980	1980-09-30	319.519	70.93	98.342	96.6645	75.853	54.122	19604	34.174					Q3/1980	#N/A	#N/A	#N/A	#N/A	#N/A	#N/A	#N/A	#N/A				Q3/1980	#N/A				140.091	203.875	-6.2512	343.966
Q4/1980	1980-12-31	350.749	71.62	97.861	95.9069	75.863	56.734	19100	34.619					Q4/1980	#N/A	#N/A	#N/A	#N/A	#N/A	#N/A	#N/A	#N/A				Q4/1980	#N/A				138.993	198.178	-7.6708	337.171
Q1/1981	1981-03-31	344.46	68.366	96.578	95.3188	76.158	59.329	19206	34.839					Q1/1981	#N/A	#N/A	#N/A	#N/A	#N/A	#N/A	#N/A	#N/A				Q1/1981	#N/A				138.14	198.898	-0.1574	337.038
Q2/1981	1981-06-30	332.812	72.371	96.711	98.3589	77.24	61.919	19565	34.824					Q2/1981	#N/A	#N/A	#N/A	#N/A	#N/A	#N/A	#N/A	#N/A				Q2/1981	#N/A				142.546	200.399	7.1967	342.945
Q3/1981	1981-09-30	307.144	75.957	96.293	94.135	76.709	57.437	19701	34.971					Q3/1981	#N/A	#N/A	#N/A	#N/A	#N/A	#N/A	#N/A	#N/A				Q3/1981	#N/A				136.425	194.662	-13.1298	331.087
Q4/1981	1981-12-31	275.678	74.077	95.159	89.2809	74.03	52.684	18837	34.665					Q4/1981	#N/A	#N/A	#N/A	#N/A	#N/A	#N/A	#N/A	#N/A				Q4/1981	#N/A				129.39	183.4	-20.34	312.79
Q1/1982	1982-03-31	259.791	73.012	92.558	92.1658	73.691	51.616	18556	34.554					Q1/1982	#N/A	#N/A	#N/A	#N/A	#N/A	#N/A	#N/A	#N/A				Q1/1982	#N/A				133.571	183.549	5.654	317.12
Q2/1982	1982-06-30	251.58	80.653	90.491	90.1345	71.881	45.971	18838	34.506					Q2/1982	#N/A	#N/A	#N/A	#N/A	#N/A	#N/A	#N/A	#N/A				Q2/1982	#N/A				130.627	186.582	0.1121	317.209
Q3/1982	1982-09-30	250.781	80.123	89.883	89.9308	71.101	45.309	19259	34.208					Q3/1982	#N/A	#N/A	#N/A	#N/A	#N/A	#N/A	#N/A	#N/A				Q3/1982	#N/A				130.332	181.282	-6.8714	311.614
Q4/1982	1982-12-31	269.151	81.394	87.473	92.4204	72.971	49.502	19736	34.02					Q4/1982	#N/A	#N/A	#N/A	#N/A	#N/A	#N/A	#N/A	#N/A				Q4/1982	#N/A				133.94	179.628	2.5319	313.567
Q1/1983	1983-03-31	315.017	83.212	87.899	95.161	74.144	52.363	19727	33.476					Q1/1983	#N/A	#N/A	#N/A	#N/A	#N/A	#N/A	#N/A	#N/A				Q1/1983	#N/A				137.912	175.789	0.1704	313.701
Q2/1983	1983-06-30	352.338	84.943	87.294	99.5073	75.873	58.214	17636	33.266					Q2/1983	#N/A	#N/A	#N/A	#N/A	#N/A	#N/A	#N/A	#N/A				Q2/1983	#N/A				144.211	180.237	14.4237	324.448
Q3/1983	1983-09-30	387.246	83.757	86.848	101.392	77.619	58.234	17621	32.763					Q3/1983	#N/A	#N/A	#N/A	#N/A	#N/A	#N/A	#N/A	#N/A				Q3/1983	#N/A				146.942	177.906	0.4937	324.848
Q4/1983	1983-12-31	403.6	85.921	85.633	102.742	77.695	55.481	17756	32.092					Q4/1983	#N/A	#N/A	#N/A	#N/A	#N/A	#N/A	#N/A	#N/A				Q4/1983	#N/A				148.898	182.699	8.5744	331.598
Q1/1984	1984-03-31	414.825	88.706	84.66	102.189	77.035	55.563	17800	31.667					Q1/1984	#N/A	#N/A	#N/A	#N/A	#N/A	#N/A	#N/A	#N/A				Q1/1984	#N/A				148.097	171.921	-13.2535	320.018
Q2/1984	1984-06-30	422.5	86.293	84.939	103.484	76.987	55.487	17665	31.546					Q2/1984	#N/A	#N/A	#N/A	#N/A	#N/A	#N/A	#N/A	#N/A				Q2/1984	#N/A				149.973	162.762	-8.7974	312.735
Q3/1984	1984-09-30	418.439	83.732	82.41	103.592	76.943	56.648	17777	31.704					Q3/1984	#N/A	#N/A	#N/A	#N/A	#N/A	#N/A	#N/A	#N/A				Q3/1984	#N/A				150.13	180.457	24.8651	330.588
Q4/1984	1984-12-31	418.872	82.386	81.239	101.405	76.519	56.933	17635	31.974					Q4/1984	#N/A	#N/A	#N/A	#N/A	#N/A	#N/A	#N/A	#N/A				Q4/1984	#N/A				146.961	188.911	6.5494	335.872
Q1/1985	1985-03-31	417.571	89.349	80.501	94.8134	74.776	56.73	17858	33.068					Q1/1985	#N/A	#N/A	#N/A	#N/A	#N/A	#N/A	#N/A	#N/A				Q1/1985	#N/A				137.408	177.425	-22.7992	314.833
Q2/1985	1985-06-30	420.904	81.659	79.051	96.2026	75.289	58.084	18527	33.725					Q2/1985	#N/A	#N/A	#N/A	#N/A	#N/A	#N/A	#N/A	#N/A				Q2/1985	#N/A				139.421	189.579	19.2516	329
Q3/1985	1985-09-30	426.255	80.393	80.053	95.2753	74.178	62.548	18421	34.596					Q3/1985	#N/A	#N/A	#N/A	#N/A	#N/A	#N/A	#N/A	#N/A				Q3/1985	#N/A				138.077	193.632	3.3346	331.709
Q4/1985	1985-12-31	436.401	79.008	80.67	95.4555	73.727	66.433	18044	35.08					Q4/1985	#N/A	#N/A	#N/A	#N/A	#N/A	#N/A	#N/A	#N/A				Q4/1985	#N/A				138.339	202.919	12.0211	341.257
Q1/1986	1986-03-31	455.045	76.05	80.868	96.869	74.145	65.63	18409	35.197					Q1/1986	#N/A	#N/A	#N/A	#N/A	#N/A	#N/A	#N/A	#N/A				Q1/1986	#N/A				140.387	192.288	-9.6869	332.675
Q2/1986	1986-06-30	480.306	74.519	80.799	90.5079	71.472	67.817	19005	35.37					Q2/1986	#N/A	#N/A	#N/A	#N/A	#N/A	#N/A	#N/A	#N/A				Q2/1986	#N/A				131.168	205.192	4.5062	336.361
Q3/1986	1986-09-30	487.7	80.014	80.695	93.1414	71.482	69.26	19885	35.247					Q3/1986	#N/A	#N/A	#N/A	#N/A	#N/A	#N/A	#N/A	#N/A				Q3/1986	#N/A				134.985	204.351	3.5857	339.336
Q4/1986	1986-12-31	486.818	87.491	81.252	95.2578	71.607	70.578	20569	35.564					Q4/1986	#N/A	#N/A	#N/A	#N/A	#N/A	#N/A	#N/A	#N/A				Q4/1986	#N/A				138.052	213.053	14.611	351.105
Q1/1987	1987-03-31	485.541	84.604	82.976	91.9995	70.519	74.468	20983	36.091					Q1/1987	#N/A	#N/A	#N/A	#N/A	#N/A	#N/A	#N/A	#N/A				Q1/1987	#N/A				133.33	190.907	-27.2719	324.237
Q2/1987	1987-06-30	487.667	91.314	82.991	93.9319	70.97	77.283	22489	37.179					Q2/1987	#N/A	#N/A	#N/A	#N/A	#N/A	#N/A	#N/A	#N/A				Q2/1987	#N/A				136.13	213.553	35.2858	349.684
Q3/1987	1987-09-30	486.193	100.104	84.157	93.6684	70.413	80.591	24247	38.47					Q3/1987	#N/A	#N/A	#N/A	#N/A	#N/A	#N/A	#N/A	#N/A				Q3/1987	#N/A				135.749	215.978	2.3574	351.727
Q4/1987	1987-12-31	488.58	98.007	84.073	97.107	69.67	79.754	26089	39.751					Q4/1987	#N/A	#N/A	#N/A	#N/A	#N/A	#N/A	#N/A	#N/A				Q4/1987	#N/A				140.732	215.791	5.5671	356.523
Q1/1988	1988-03-31	478	109.813	85.883	96.4218	70.815	78.955	27192	41.698					Q1/1988	#N/A	#N/A	#N/A	#N/A	#N/A	#N/A	#N/A	#N/A				Q1/1988	#N/A				139.739	211.611	-5.6789	351.35
Q2/1988	1988-06-30	481.806	114.504	86.499	99.2223	72.038	80.057	26424	42.494					Q2/1988	#N/A	#N/A	#N/A	#N/A	#N/A	#N/A	#N/A	#N/A				Q2/1988	#N/A				143.798	215.279	9.0912	359.077
Q3/1988	1988-09-30	482.099	117.309	88.42	100.061	72.221	79.38	25796	43.835					Q3/1988	#N/A	#N/A	#N/A	#N/A	#N/A	#N/A	#N/A	#N/A				Q3/1988	#N/A				145.014	220.28	7.1075	365.294
Q4/1988	1988-12-31	486.327	113.925	91.568	102.932	72.552	80.666	26566	42.293					Q4/1988	#N/A	#N/A	#N/A	#N/A	#N/A	#N/A	#N/A	#N/A				Q4/1988	#N/A				149.175	219.805	4.0975	368.979
Q1/1989	1989-03-31	483.154	116.734	92.178	105.037	72.77	84.374	26790	44.686					Q1/1989	#N/A	#N/A	#N/A	#N/A	#N/A	#N/A	#N/A	#N/A				Q1/1989	#N/A				152.224	234.764	20.999	386.988
Q2/1989	1989-06-30	468.831	108.202	95.617	105.95	72.338	81.192	26021	43.392					Q2/1989	#N/A	#N/A	#N/A	#N/A	#N/A	#N/A	#N/A	#N/A				Q2/1989	#N/A				153.547	223.937	-9.4672	377.484
Q3/1989	1989-09-30	463.723	103.184	96.075	109.458	74.527	81.631	25834	43.897					Q3/1989	#N/A	#N/A	#N/A	#N/A	#N/A	#N/A	#N/A	#N/A				Q3/1989	#N/A				158.632	231.287	13.842	389.919
Q4/1989	1989-12-31	453.985	97.305	96.313	112.029	76.185	84.285	26094	45.823					Q4/1989	#N/A	#N/A	#N/A	#N/A	#N/A	#N/A	#N/A	#N/A				Q4/1989	#N/A				162.357	235.2	8.0693	397.558
Q1/1990	1990-03-31	458.641	95.842	95.696	113.804	76.563	82.125	26388	46.461					Q1/1990	#N/A	#N/A	#N/A	#N/A	#N/A	#N/A	#N/A	#N/A				Q1/1990	#N/A				164.93	252.557	21.6102	417.487
Q2/1990	1990-06-30	440.924	93.569	94.606	120.54	76.874	77.227	26960	47.646					Q2/1990	#N/A	#N/A	#N/A	#N/A	#N/A	#N/A	#N/A	#N/A				Q2/1990	#N/A				174.693	240.84	-1.8591	415.533
Q3/1990	1990-09-30	415.92	93.144	92.796	122.64	76.466	72.179	27885	48.311					Q3/1990	#N/A	#N/A	#N/A	#N/A	#N/A	#N/A	#N/A	#N/A				Q3/1990	#N/A				177.736	244.192	6.2995	421.928
Q4/1990	1990-12-31	392.917	91.492	92.295	125.053	76.668	66.644	27800	48.243					Q4/1990	#N/A	#N/A	#N/A	#N/A	#N/A	#N/A	#N/A	#N/A				Q4/1990	#N/A				181.232	249.489	8.6001	430.721
Q1/1991	1991-03-31	369.485	87.882	89.817	127.55	78.098	62.198	27553	47.688					Q1/1991	438.266	310.716	127.55	438.266	#N/A	#N/A	127.55	-0.0001				Q1/1991	#N/A				184.852	253.415	7.1935	438.266
Q2/1991	1991-06-30	378.2	83.779	88.481	125.569	78.916	63.171	26517	47.044					Q2/1991	440.272	314.703	125.569	440.272	1.84346	0.000160049	125.569	0.0001				Q2/1991	1.8433	1.84346	-0.000160049		185.024	255.248	1.4902	440.272
Q3/1991	1991-09-30	393.917	81.553	87.7	124.838	79.488	64.94	25076	46.066					Q3/1991	445.237	320.399	124.838	445.237	4.58773	0.000627173	124.838	-0.0001				Q3/1991	4.5871	4.58773	-0.000627173		188.447	256.79	2.8996	445.237
Q4/1991	1991-12-31	402.49	81.527	84.826	132.317	79.819	66.791	24146	44.816					Q4/1991	457.522	325.205	132.317	457.522	11.5021	-0.000528266	132.317	-0.0001				Q4/1991	11.5026	11.5021	0.000528266		195.342	262.18	11.3883	457.522
Q1/1992	1992-03-31	423.064	82.475	85.552	139.961	79.636	68.551	24104	46.656					Q1/1992	467.3	327.339	139.961	467.3	8.82663	-0.000166153	139.961	0.0004				Q1/1992	8.8268	8.82663	0.000166153		199.612	267.688	12.4916	467.3
Q2/1992	1992-06-30	439.21	80.706	83.953	138.252	79.592	67.72	24659	45.046					Q2/1992	463.69	325.438	138.252	463.69	-3.05447	0.000331432	138.252	0				Q2/1992	-3.0548	-3.05447	-0.000331432		198.836	264.854	-3.3614	463.69
Q3/1992	1992-09-30	440.353	83.252	83.444	135.263	79.135	69.733	24481	44.334					Q3/1992	454.062	318.799	135.263	454.062	-8.05043	-0.00012818	135.263	-0.0001				Q3/1992	-8.0503	-8.05043	0.00012818		197.594	256.469	-9.3181	454.062
Q4/1992	1992-12-31	455.212	78.977	82.088	144.357	78.67	69.062	24171	43.859					Q4/1992	453.51	309.153	144.357	453.51	-0.485391	-0.000391177	144.357	0.0003				Q4/1992	-0.485	-0.485391	0.000391177		202.96	250.55	0.3688	453.51
Q1/1993	1993-03-31	457.355	80.62	81.02	143.885	78.5	66.062	23644	43.495					Q1/1993	444.296	300.411	143.885	444.296	-7.8825	-2.11365e-07	143.885	0				Q1/1993	-7.8825	-7.8825	2.11365e-07		200.446	243.85	-8.0534	444.296
Q2/1993	1993-06-30	462.642	85.533	79.876	143.361	77.989	66.079	23895	43.608					Q2/1993	438.53	295.169	143.361	438.53	-5.09095	0.0006492	143.361	-0.0001				Q2/1993	-5.0916	-5.09095	-0.0006492		199.275	239.255	-4.8357	438.53
Q3/1993	1993-09-30	478.644	86.631	79.316	146.471	77.9	66.291	24891	43.256					Q3/1993	441.689	295.218	146.47	441.689	2.91273	-0.000170164	146.471	-0.0006				Q3/1993	2.9129	2.91273	0.000170164		204.432	237.257	2.3449	441.689
Q4/1993	1993-12-31	502.791	92.137	79.828	150.038	78.258	66.619	26466	43.965					Q4/1993	435.07	285.032	150.037	435.07	-5.86086	0.000237936	150.038	-0.0008				Q4/1993	-5.8611	-5.86086	-0.000237936		204.709	230.361	-5.3519	435.07
Q1/1994	1994-03-31	512.649	86.281	81.331	158.774	77.825	69.372	24863	43.16					Q1/1994	448.834	290.06	158.773	448.834	13.2678	-0.000306285	158.774	-0.0005				Q1/1994	13.2681	13.2678	0.000306285		213.26	235.575	14.7941	448.834
Q2/1994	1994-06-30	529.938	84.636	82.65	163.973	77.521	70.738	26056	43.969					Q2/1994	454.4	290.427	163.973	454.4	5.05344	-0.000555074	163.973	-0.0001				Q2/1994	5.054	5.05344	0.000555074		217.62	236.78	6.1032	454.4
Q3/1994	1994-09-30	524.365	82.878	83.879	162.932	77.287	69.191	28431	44.587					Q3/1994	456.406	293.474	162.932	456.406	1.77757	7.28057e-05	162.932	0.0004				Q3/1994	1.7775	1.77757	-7.28057e-05		217.859	238.547	2.2081	456.406
Q4/1994	1994-12-31	517.65	81.591	84.951	168.907	77.654	66.116	27109	45.202					Q4/1994	466.236	297.329	168.906	466.236	8.89748	0.000781584	168.907	-0.0006				Q4/1994	8.8967	8.89748	-0.000781584		223.628	242.608	8.8721	466.236
Q1/1995	1995-03-31	506.077	80.037	85.425	163.738	77.589	61.668	26095	45.64					Q1/1995	454.764	291.026	163.738	454.764	-9.48489	-0.000387702	163.738	0.0004				Q1/1995	-9.4845	-9.48489	0.000387702		218.703	236.061	-10.2882	454.764
Q2/1995	1995-06-30	489.932	77.937	84.909	169.239	77.381	58.315	25277	47.376					Q2/1995	462.787	293.548	169.239	462.787	7.2458	-0.000200252	169.239	0.0005				Q2/1995	7.246	7.2458	0.000200252		223.293	239.494	8.0634	462.787
Q3/1995	1995-09-30	505.22	75.632	84.615	163.371	77.741	57.694	24647	49.1					Q3/1995	457.923	294.552	163.371	457.923	-4.13828	2.19433e-05	163.371	0				Q3/1995	-4.1383	-4.13828	-2.19433e-05		218.94	238.983	-4.8821	457.923
Q4/1995	1995-12-31	516.65	74.829	84.082	162.309	80.212	57.9	25301	48.936					Q4/1995	454.714	292.405	162.309	454.714	-2.77376	0.000236191	162.309	-0.0003				Q4/1995	-2.774	-2.77376	-0.000236191		217.741	236.973	-3.8125	454.714
Q1/1996	1996-03-31	530.224	81.54	84.297	151.986	76.213	59.689	26369	51.932					Q1/1996	430.093	278.107	151.986	430.093	-19.962	9.37592e-05	151.986	0				Q1/1996	-19.9621	-19.962	-9.37592e-05		205.594	224.499	-19.779	430.093
Q2/1996	1996-06-30	552.656	84.066	84.659	169.164	77.751	62.928	27744	51.26					Q2/1996	464.693	295.529	169.164	464.693	36.2746	3.41744e-05	169.164	0.0002				Q2/1996	36.2746	36.2746	-3.41744e-05		223.618	241.075	37.9915	464.693
Q3/1996	1996-09-30	551.084	84.69	85.587	168.257	76.62	66.656	28885	50.416					Q3/1996	464.091	295.834	168.257	464.091	-0.517185	-0.00018549	168.257	0				Q3/1996	-0.517	-0.517185	0.00018549		224.379	239.712	-1.6164	464.091
Q4/1996	1996-12-31	545.512	89.269	86.189	169.029	74.464	68.84	29533	50.592					Q4/1996	465.244	296.215	169.03	465.244	0.99748	-0.000319819	169.029	0.0007				Q4/1996	0.9978	0.99748	0.000319819		224.563	240.681	1.2405	465.244
Q1/1997	1997-03-31	547.369	68.16	86.678	160.691	73.77	68.935	28316	52.16					Q1/1997	450.777	290.086	160.691	450.777	-11.87	0.000220632	160.691	0.0001				Q1/1997	-11.8702	-11.87	-0.000220632		216.507	234.27	-12.4819	450.777
Q2/1997	1997-06-30	554.227	70.988	87.951	167.091	73.454	69.696	25242	52.756					Q2/1997	460.506	293.415	167.091	460.506	8.91663	0.000325282	167.091	-0.0002				Q2/1997	8.9163	8.91663	-0.000325282		221.807	238.699	10.3105	460.506
Q3/1997	1997-09-30	556.799	69.552	89.015	166.186	74.127	70.122	23467	51.856					Q3/1997	461.158	294.972	166.186	461.158	0.567537	3.74419e-05	166.186	-0.0004				Q3/1997	0.5675	0.567537	-3.74419e-05		220.89	240.268	1.0455	461.158
Q4/1997	1997-12-31	562.371	74	89.94	165.854	78.664	70.312	22408	52.684					Q4/1997	465.119	299.265	165.855	465.119	3.48022	-0.00058206	165.854	0.0006				Q4/1997	3.4808	3.48022	0.00058206		220.488	244.631	3.9321	465.119
Q1/1998	1998-03-31	574.087	69.924	90.66	168.368	74.746	68.386	22355	55.472					Q1/1998	477.392	309.024	168.368	477.392	10.9799	0.000273383	168.368	0.0002				Q1/1998	10.9796	10.9799	-0.000273383		226.494	250.898	9.7768	477.392
Q2/1998	1998-06-30	589.947	71.88	91.948	164.615	74.208	67.298	21881	55.408					Q2/1998	471.374	306.759	164.616	471.374	-4.94785	-0.000349162	164.615	0.0008				Q2/1998	-4.9475	-4.94785	0.000349162		220.865	250.509	-4.2599	471.374
Q3/1998	1998-09-30	605.949	72.092	93.587	165.604	74.157	66.51	21293	60.052					Q3/1998	477.292	311.688	165.604	477.292	5.11728	0.000682311	165.604	-0.0003				Q3/1998	5.1166	5.11728	-0.000682311		222.566	254.726	5.544	477.292
Q4/1998	1998-12-31	620.523	71.96	95.277	162.202	74.889	65.803	20622	60.348					Q4/1998	474.584	312.382	162.202	474.584	-2.25023	-0.000128856	162.202	-0.0001				Q4/1998	-2.2501	-2.25023	0.000128856		220.131	254.453	-3.1997	474.584
Q1/1999	1999-03-31	622.958	73.552	98.004	163.95	75.307	66.95	20526	59.904					Q1/1999	488.311	324.361	163.95	488.311	12.0814	-0.000170699	163.95	0.0002				Q1/1999	12.0816	12.0814	0.000170699		225.117	263.194	10.6533	488.311
Q2/1999	1999-06-30	632.66	73.24	99.333	167.014	75.68	69.466	22029	62.772					Q2/1999	492.523	325.509	167.014	492.523	3.49516	-0.000141451	167.014	-0.0002				Q2/1999	3.4953	3.49516	0.000141451		227.533	264.99	4.587	492.523
Q3/1999	1999-09-30	637.415	76.904	100.768	169.921	75.945	70.294	22362	64.964					Q3/1999	502.001	332.08	169.92	502.001	7.92257	0.000566461	169.921	-0.0006				Q3/1999	7.922	7.92257	-0.000566461		230.497	271.504	9.3026	502.001
Q4/1999	1999-12-31	642.067	77.152	101.97	167.255	76.677	71.274	21326	68.8					Q4/1999	500.145	332.89	167.256	500.145	-1.4707	-0.000500123	167.255	0.0006				Q4/1999	-1.4702	-1.4707	0.000500123		229.203	270.942	-2.6131	500.145
Q1/2000	2000-03-31	645.257	80.356	103.472	166.352	79.683	70.271	21360	77.208					Q1/2000	509.485	343.133	166.352	509.485	7.6817	0.000395002	166.352	0.0002				Q1/2000	7.6813	7.6817	-0.000395002		228.027	281.458	9.6273	509.485
Q2/2000	2000-06-30	641.947	81.78	103.818	164.283	79.66	70.755	21813	77.592					Q2/2000	508.933	344.65	164.283	508.933	-0.432675	-0.000274998	164.283	-0.0002				Q2/2000	-0.4324	-0.432675	0.000274998		226.095	282.838	-0.6474	508.933
Q3/2000	2000-09-30	631.964	76.208	103.92	161.989	80.853	73.829	21284	79.28					Q3/2000	513.496	351.507	161.989	513.496	3.63485	-0.000252855	161.989	0.0004				Q3/2000	3.6351	3.63485	0.000252855		225.083	288.413	3.5126	513.496
Q4/2000	2000-12-31	632.615	76.96	103.997	157.6	79.972	75.199	21834	80.04					Q4/2000	509.735	352.135	157.601	509.735	-2.89769	9.39382e-06	157.6	0.0006				Q4/2000	-2.8977	-2.89769	-9.39382e-06		221.853	287.882	-3.8462	509.735
Q1/2001	2001-03-31	635.333	78.356	104.348	155.203	81.103	77.314	21712	81.84					Q1/2001	511.391	356.188	155.203	511.391	1.30585	0.0007451	155.203	-0.0004				Q1/2001	1.3051	1.30585	-0.0007451		221.371	290.02	0.1261	511.391
Q2/2001	2001-06-30	645.175	78.38	104.285	153.959	81.651	79.073	20314	83.024					Q2/2001	502.113	348.154	153.96	502.113	-7.06195	-0.000653358	153.959	0.0009				Q2/2001	-7.0613	-7.06195	0.000653358		219.186	282.927	-7.8203	502.113
Q3/2001	2001-09-30	649.193	80.44	104.731	152.684	80.878	81.134	20172	84.916					Q3/2001	493.94	341.256	152.684	493.94	-6.35363	0.000565564	152.684	-0.0002				Q3/2001	-6.3542	-6.35363	-0.000565564		217.654	276.286	-7.1415	493.94
Q4/2001	2001-12-31	645.028	76.904	105.553	151.835	81.234	84.731	20265	85.248					Q4/2001	488.674	336.839	151.835	488.674	-4.19677	-0.000472092	151.835	0.0003				Q4/2001	-4.1963	-4.19677	0.000472092		216.471	272.203	-4.5428	488.674
Q1/2002	2002-03-31	666.173	79.82	106.449	148.286	83.473	89.533	20057	87.428					Q1/2002	479.335	331.049	148.286	479.335	-7.428	0.000197274	148.286	-0.0003				Q1/2002	-7.4282	-7.428	-0.000197274		212.821	266.514	-8.115	479.335
Q2/2002	2002-06-30	682.712	83.892	107.346	143.335	80.235	91.138	20174	89.016					Q2/2002	469.055	325.72	143.335	469.055	-8.30651	-0.000207761	143.335	0				Q2/2002	-8.3063	-8.30651	0.000207761		206.743	262.312	-8.601	469.055
Q3/2002	2002-09-30	684.731	84.18	108.21	142.876	84.229	92.754	20024	89.612					Q3/2002	467.3	324.424	142.876	467.3	-1.48825	5.246e-05	142.876	0.0001				Q3/2002	-1.4883	-1.48825	-5.246e-05		205.045	262.255	-0.8709	467.3
Q4/2002	2002-12-31	697.06	91.552	109.027	141.992	86.614	94.788	19691	91.12					Q4/2002	464.743	322.751	141.992	464.743	-2.17084	0.000355457	141.992	-0.0003				Q4/2002	-2.1712	-2.17084	-0.000355457		203.537	261.206	-1.7006	464.743
Q1/2003	2003-03-31	709.797	86.968	109.452	140.335	86.67	94.005	19488	94.412					Q1/2003	465.044	324.709	140.335	465.044	0.25932	0.000119709	140.335	0				Q1/2003	0.2592	0.25932	-0.000119709		203.645	261.399	-0.8566	465.044
Q2/2003	2003-06-30	720.996	86.996	110.007	141.128	86.74	92.591	19641	95.612					Q2/2003	463.289	322.161	141.127	463.289	-1.50101	8.9045e-05	141.128	-0.0008				Q2/2003	-1.5011	-1.50101	-8.9045e-05		203.132	260.157	-0.5596	463.289
Q3/2003	2003-09-30	762.348	89.384	111.084	142.116	86.769	96.511	20082	97.72					Q3/2003	463.64	321.524	142.115	463.64	0.303395	-4.84766e-06	142.116	-0.0006				Q3/2003	0.3034	0.303395	4.84766e-06		203.175	260.465	0.7644	463.64
Q4/2003	2003-12-31	785.001	92.236	112.049	141.654	87.414	97.932	19670	98.828					Q4/2003	462.787	321.133	141.654	462.787	-0.733887	-0.000487391	141.654	-0.0002				Q4/2003	-0.7334	-0.733887	0.000487391		201.85	260.937	-0.3998	462.787
Q1/2004	2004-03-31	794.183	95.7	113.654	139.736	88.079	100.587	19760	99.06					Q1/2004	462.399	322.663	139.736	462.399	-0.334938	0.000462048	139.736	-0.0005				Q1/2004	-0.3354	-0.334938	-0.000462048		203.954	258.445	-2.9527	462.399
Q2/2004	2004-06-30	819.482	95.524	114.749	136.479	88.632	102.727	20188	101.26					Q2/2004	457.835	321.356	136.479	457.835	-3.89004	-0.000535846	136.479	0.0003				Q2/2004	-3.8895	-3.89004	0.000535846		198.911	258.924	-2.7971	457.835
Q3/2004	2004-09-30	825.261	95.052	115.483	133.36	89.224	103.656	20201	101.7					Q3/2004	460.293	326.933	133.36	460.293	2.16485	0.000754597	133.36	0.0001				Q3/2004	2.1641	2.16485	-0.000754597		196.561	263.732	1.5956	460.293
Q4/2004	2004-12-31	836.661	92.764	116.373	131.879	90.33	105.731	20077	103.488					Q4/2004	456.833	324.954	131.879	456.833	-2.97305	5.26916e-05	131.879	-0.0004				Q4/2004	-2.9731	-2.97305	-5.26916e-05		194.405	262.428	-3.2412	456.833
Q1/2005	2005-03-31	856.407	90.744	117.725	127.131	91.029	105.682	19922	104.976					Q1/2005	452.068	324.937	127.131	452.068	-4.10738	-0.000778413	127.131	0.0001				Q1/2005	-4.1066	-4.10738	0.000778413		190.127	261.941	-2.8785	452.068
Q2/2005	2005-06-30	872.294	102.784	119.584	129.734	93.782	108.759	19628	107.812					Q2/2005	459.691	329.957	129.734	459.691	6.91754	0.000735445	129.734	-0.0004				Q2/2005	6.9168	6.91754	-0.000735445		193.125	266.566	6.359	459.691
Q3/2005	2005-09-30	881.881	96.156	120.751	131.04	96.058	109.105	20017	109.184					Q3/2005	466.31	335.27	131.04	466.31	5.88511	-0.000285225	131.04	0				Q3/2005	5.8854	5.88511	0.000285225		196.522	269.788	4.1134	466.31
Q4/2005	2005-12-31	879.861	98.56	122.181	131.415	97.44	109.484	20259	109.824					Q4/2005	477.342	345.927	131.415	477.342	9.80438	-0.00021655	131.415	0.0001				Q4/2005	9.8046	9.80438	0.00021655		196.777	280.565	11.5815	477.342
Q1/2006	2006-03-31	871.657	101.476	123.79	129.258	98.509	113.421	20129	112.96					Q1/2006	474.81	345.552	129.258	474.81	-2.10493	7.30183e-05	129.258	0.0002				Q1/2006	-2.105	-2.10493	-7.30183e-05		194.608	280.202	-0.5932	474.81
Q2/2006	2006-06-30	827.827	96.48	125.622	138.558	98.454	112.038	19985	114.632					Q2/2006	502.891	364.333	138.557	502.891	25.8392	0.000522116	138.558	-0.0006				Q2/2006	25.8387	25.8392	-0.000522116		204.765	298.126	28.6336	502.891
Q3/2006	2006-09-30	781.646	96.196	126.565	141.815	97.607	108.936	20106	115.584					Q3/2006	506.401	364.586	141.814	506.401	2.82122	-7.70204e-05	141.815	-0.0006				Q3/2006	2.8213	2.82122	7.70204e-05		208.584	297.817	1.6245	506.401
Q4/2006	2006-12-31	745.152	98.276	127.811	145.037	103.273	108.832	20196	117.424					Q4/2006	522.296	377.259	145.037	522.296	13.1589	-0.000435525	145.037	0.0002				Q4/2006	13.1593	13.1589	0.000435525		213.457	308.839	13.2587	522.296
Q1/2007	2007-03-31	711.154	100.864	129.034	140.13	102.398	113.13	19917	115.952					Q1/2007	521.018	380.888	140.13	521.018	-0.975169	0.000131159	140.13	0				Q1/2007	-0.9753	-0.975169	-0.000131159		205.865	315.153	2.8651	521.018
Q2/2007	2007-06-30	682.691	99.772	129.433	134.119	100.418	113.806	19555	117.256					Q2/2007	517.658	383.539	134.12	517.658	-2.55472	-0.000119406	134.119	0.0006				Q2/2007	-2.5546	-2.55472	0.000119406		202.306	315.352	-4.1893	517.658
Q3/2007	2007-09-30	639.186	98.768	129.302	135.778	99.464	113.615	17808	116.892					Q3/2007	520.466	384.688	135.778	520.466	2.18749	-0.000109079	135.778	0.0004				Q3/2007	2.1876	2.18749	0.000109079		204.382	316.084	1.2862	520.466
Q4/2007	2007-12-31	586.106	95.224	129.142	136.14	99.407	114.186	15457	116.624					Q4/2007	533.855	397.715	136.14	533.855	10.6939	2.8918e-05	136.14	0.0001				Q4/2007	10.6939	10.6939	-2.8918e-05		204.417	329.438	13.1895	533.855
Q1/2008	2008-03-31	540.012	90.112	128.454	136.843	103.168	113.175	16026	114.088					Q1/2008	536.751	399.908	136.844	536.751	2.1876	0.000297912	136.843	0.0005				Q1/2008	2.1873	2.1876	-0.000297912		205.207	331.544	2.2354	536.751
Q2/2008	2008-06-30	516.336	87.432	126.261	129.711	99.861	110.905	16866	109.564					Q2/2008	526.321	396.61	129.711	526.321	-7.54906	4.29865e-05	129.711	-0.0001				Q2/2008	-7.5491	-7.54906	-4.29865e-05		199.833	326.488	-9.3268	526.321
Q3/2008	2008-09-30	490.895	73.364	123.111	128.376	98.24	108.883	17530	103.508					Q3/2008	527.875	399.499	128.377	527.875	1.18627	-0.000330784	128.376	0.0007				Q3/2008	1.1866	1.18627	0.000330784		200.231	327.644	-0.2449	527.875
Q4/2008	2008-12-31	443.568	68.084	118.67	129.312	92.932	103.091	17525	96.532					Q4/2008	520.404	391.092	129.312	520.404	-5.54213	0.000465277	129.312	0.0002				Q4/2008	-5.5426	-5.54213	-0.000465277		199.358	321.046	-5.2886	520.404
Q1/2009	2009-03-31	400.967	64.296	113.018	126.348	90.971	96.835	16049	91.896					Q1/2009	474.22	347.872	126.349	474.22	-31.0464	-0.000297552	126.348	0.0008				Q1/2009	-31.0461	-31.0464	0.000297552		191.729	282.491	-31.6876	474.22
Q2/2009	2009-06-30	376.951	61.896	109.347	126.35	89.923	100.056	14390	85.212					Q2/2009	473.97	347.62	126.35	473.97	-0.210706	0.000594103	126.35	-0.0004				Q2/2009	-0.2113	-0.210706	-0.000594103		197.431	276.539	-6.4418	473.97
Q3/2009	2009-09-30	395.385	61.16	107.61	126.724	87.947	103.751	13395	81.172					Q3/2009	476.527	349.803	126.724	476.527	2.17547	-0.00033194	126.724	0.0001				Q3/2009	2.1758	2.17547	0.00033194		199.11	277.417	0.837	476.527
Q4/2009	2009-12-31	395.667	58.676	107.359	127.831	88.856	110.129	12950	79.56					Q4/2009	474.822	346.991	127.831	474.822	-1.42353	-0.000125757	127.831	0.0002				Q4/2009	-1.4234	-1.42353	0.000125757		198.03	276.792	-0.1189	474.822
Q1/2010	2010-03-31	382.964	60.72	108.511	126.737	89.227	112.834	13372	77.096					Q1/2010	475.261	348.524	126.737	475.261	0.370336	-0.000264004	126.737	0.0002				Q1/2010	0.3706	0.370336	0.000264004		196.511	278.75	3.0077	475.261
Q2/2010	2010-06-30	403.504	65.14	110.223	136.005	90.398	111.464	13584	76.412					Q2/2010	503.944	367.939	136.005	503.944	26.4155	0.000822894	136.005	-0.0004				Q2/2010	26.4147	26.4155	-0.000822894		208.868	295.076	26.3575	503.944
Q3/2010	2010-09-30	368.102	67.084	112.247	134.148	89.465	109.316	13665	74.188					Q3/2010	510.914	376.766	134.148	510.914	5.6482	-9.88081e-07	134.148	-0.0002				Q3/2010	5.6482	5.6482	9.88081e-07		209.034	301.88	4.3771	510.914
Q4/2010	2010-12-31	375.121	66.576	113.271	131.207	88.048	108.691	14073	71.016					Q4/2010	505.297	374.09	131.207	505.297	-4.32562	-0.000617944	131.207	0.0001				Q4/2010	-4.325	-4.32562	0.000617944		205.16	300.137	-4.4068	505.297
Q1/2011	2011-03-31	374.392	66.924	113.022	143.194	86.383	110.424	14236	68.796					Q1/2011	530.721	387.527	143.194	530.721	21.6965	0.000234382	143.194	-0.0003				Q1/2011	21.6963	21.6965	-0.000234382		218.68	312.041	24.5847	530.721
Q2/2011	2011-06-30	379.329	67.304	112.618	145.867	83.543	110.344	14009	65.936					Q2/2011	534.482	388.615	145.867	534.482	2.86491	0.000208821	145.867	0.0004				Q2/2011	2.8647	2.86491	-0.000208821		223.896	310.586	-0.3862	534.482
Q3/2011	2011-09-30	386.771	66.504	111.688	145.157	82.046	113.129	14712	62.92					Q3/2011	539.346	394.189	145.157	539.346	3.69015	5.25277e-05	145.157	0.0002				Q3/2011	3.6901	3.69015	-5.25277e-05		225.784	313.562	1.629	539.346
Q4/2011	2011-12-31	397.594	68.232	112.001	146.971	82.136	114.217	14396	61.408					Q4/2011	537.591	390.62	146.971	537.591	-1.29524	-3.72449e-05	146.971	-0.0005				Q4/2011	-1.2952	-1.29524	3.72449e-05		223.558	314.033	2.0133	537.591
Q1/2012	2012-03-31	422.467	68.112	110.812	150.554	77.037	119.173	14021	60.108					Q1/2012	538.205	387.651	150.554	538.205	0.457636	-0.000163838	150.554	0.0005				Q1/2012	0.4578	0.457636	0.000163838		228.045	310.16	-1.6983	538.205
Q2/2012	2012-06-30	426.327	64.696	110.232	151.812	77.319	118.884	14635	58.888					Q2/2012	534.495	382.683	151.811	534.495	-2.72893	0.000465962	151.812	-0.0005				Q2/2012	-2.7294	-2.72893	-0.000465962		231.53	302.965	-6.5917	534.495
Q3/2012	2012-09-30	437.269	64.184	109.698	152.891	77.226	118.175	14913	57.04					Q3/2012	536.801	383.91	152.891	536.801	1.73694	-0.000458539	152.891	-0.0003				Q3/2012	1.7374	1.73694	0.000458539		234.461	302.34	-0.2848	536.801
Q4/2012	2012-12-31	459.818	66.256	109.425	150.549	76.804	118.055	15223	56.316					Q4/2012	531.335	380.786	150.549	531.335	-4.01123	-0.000128454	150.549	0.0001				Q4/2012	-4.0111	-4.01123	0.000128454		229.967	301.368	-2.6827	531.335
Q1/2013	2013-03-31	475.908	67.544	109.696	144.947	74.35	117.638	15338	54.296					Q1/2013	512.858	367.911	144.946	512.858	-13.201	0.000423462	144.947	-0.0006				Q1/2013	-13.2014	-13.201	-0.000423462		217.313	295.545	-5.5616	512.858
Q2/2013	2013-06-30	489.54	71.576	109.978	150.3	74.512	119.443	15515	52.54					Q2/2013	529.655	379.355	150.301	529.655	13.7585	-0.000623262	150.3	0.0005				Q2/2013	13.7591	13.7585	0.000623262		229.822	299.833	5.0081	529.655
Q3/2013	2013-09-30	496.753	73.736	109.964	153.596	74.041	118.701	16019	51.156					Q3/2013	531.862	378.266	153.596	531.862	1.67719	0.000491954	153.596	-0.0003				Q3/2013	1.6767	1.67719	-0.000491954		230.149	301.713	5.2075	531.862
Q4/2013	2013-12-31	491.086	75.456	109.206	152.561	71.728	118.629	16636	50.636					Q4/2013	541.69	389.129	152.561	541.69	7.5988	9.89584e-05	152.561	-0.0001				Q4/2013	7.5987	7.5988	-9.89584e-05		235.284	306.406	5.658	541.69
Q1/2014	2014-03-31	487.602	77.52	108.143	158.899	70.806	117.962	16925	58.812					Q1/2014	553.048	394.149	158.898	553.048	8.65458	-0.000321496	158.899	-0.0005				Q1/2014	8.6549	8.65458	0.000321496		241.899	311.149	8.3158	553.048
Q2/2014	2014-06-30	502.956	79.292	107.131	153.479	68.8	120.964	15345	58.696					Q2/2014	546.529	393.05	153.479	546.529	-4.63225	-0.000148899	153.479	0				Q2/2014	-4.6321	-4.63225	0.000148899		232.069	314.46	3.9196	546.529
Q3/2014	2014-09-30	508.485	81.424	106.259	153.949	67.712	123.636	14222	57.784					Q3/2014	543.721	389.772	153.949	543.721	-2.03937	3.28063e-05	153.949	0.0004				Q3/2014	-2.0394	-2.03937	-3.28063e-05		225.577	318.144	4.5346	543.721
Q4/2014	2014-12-31	521.805	80.76	105.365	154.04	67.343	123.995	14311	56.844					Q4/2014	551.193	397.153	154.04	551.193	5.61129	0.000289702	154.04	0.0001				Q4/2014	5.611	5.61129	-0.000289702		229.23	321.963	4.6791	551.193
Q1/2015	2015-03-31	536.077	80.792	104.788	152.586	67.003	124.712	14733	57.548					Q1/2015	548.084	395.498	152.586	548.084	-2.23718	-7.95991e-05	152.586	-0.0004				Q1/2015	-2.2371	-2.23718	7.95991e-05		222.138	325.946	4.8158	548.084
Q2/2015	2015-06-30	551.122	83.832	104.476	152.365	67.107	124.943	15004	57.588					Q2/2015	548.334	395.969	152.365	548.334	0.182579	-0.000521342	152.365	0.0003				Q2/2015	0.1831	0.182579	0.000521342		218.236	330.098	4.9518	548.334
Q3/2015	2015-09-30	565.21	83.116	104.583	152.834	67.437	126.631	15232	56.996					Q3/2015	552.898	400.065	152.833	552.898	3.37116	0.000556122	152.834	-0.0005				Q3/2015	3.3706	3.37116	-0.000556122		218.477	334.421	5.0567	552.898
Q4/2015	2015-12-31	575.319	85.08	105.163	155.46	68.335	127.152	15198	57.6					Q4/2015	566.738	411.279	155.459	566.738	10.395	6.26937e-05	155.46	-0.0005				Q4/2015	10.3949	10.395	-6.26937e-05		227.936	338.802	5.0579	566.738
Q1/2016	2016-03-31	593.718	87.68	105.743	158.191	68.842	129.518	15413	59.8					Q1/2016	573.808	415.617	158.191	573.808	5.08411	-0.000287056	158.191	0.0004				Q1/2016	5.0844
Q2/2016	2016-06-30	586.54	87.56	106.484	158.372	69.432	130.285	15747	59.528					Q2/2016	566.888	408.516	158.372	566.888	-4.73735	-4.96716e-05	158.372	0.0003				Q2/2016	-4.7373
Q3/2016	2016-09-30	579.754	88.632	107.659	159	69.623	129.337	16145	59.596					Q3/2016	569.746	410.746	159	569.746	2.03193	-0.000174185	159	0.0004				Q3/2016	2.0321
Q4/2016	2016-12-31	589.767	92.196	109.162	160.75	69.875	130.697	16267	60.816					Q4/2016	569.646	408.896	160.751	569.646	-0.0701882	0.000211758	160.75	0.0005				Q4/2016	-0.0704
Q1/2017	2017-03-31	605.508	97.092	111.091	162.825	70.423	133.303	16457	63.448					Q1/2017	584.589	421.764	162.825	584.589	10.913	-0.000226665	162.825	0.0005				Q1/2017	10.9132
Q2/2017	2017-06-30	594.101	93.776	112.618	165.611	70.561	132.453	16606	64.544					Q2/2017	593.365	427.754	165.611	593.365	6.14148	0.000481687	165.611	-0.0005				Q2/2017	6.141
Q3/2017	2017-09-30	587.012	95.468	113.608	165.919	71.148	132.395	16326	65.052					Q3/2017	595.922	430.003	165.919	595.922	1.7349	-0.000197581	165.919	0.0002				Q3/2017	1.7351
Q4/2017	2017-12-31	604.949	96.092	114.236	164.797	71.884	136.56	15882	66.608					Q4/2017	596.123	431.326	164.797	596.123	0.134985	0.000285261	164.797	-0.0002				Q4/2017	0.1347
Q1/2018	2018-03-31	604.993	97.86	114.796	167.017	72.064	135.524	15545	67.774					Q1/2018	604.11	437.093	167.017	604.11	5.46797	-0.000430332	167.017	-0.0002				Q1/2018	5.4684
Q2/2018	2018-06-30	611.687	98.349	115.36	168.419	72.244	135.862	15641	68.722					Q2/2018	610.191	441.772	168.419	610.191	4.08762	-0.000176777	168.419	0.0001				Q2/2018	4.0878
Q3/2018	2018-09-30	618.456	98.349	116.04	169.75	72.424	136.2	15757	69.547					Q3/2018	616.285	446.535	169.751	616.285	4.05506	5.87226e-05	169.75	0.0005				Q3/2018	4.055
Q4/2018	2018-12-31	625.299	98.251	116.724	171.052	72.604	136.539	15874	70.312					Q4/2018	622.464	451.412	171.051	622.464	4.0712	0.000401204	171.052	-0.0006				Q4/2018	4.0708
Q1/2019	2019-03-31	631.46	98.153	117.436	172.362	72.785	136.947	16021	71.015					Q1/2019	628.386	456.024	172.362	628.386	3.86017	-0.00032598	172.362	0.0004				Q1/2019	3.8605
Q2/2019	2019-06-30	637.682	98.035	118.199	173.682	72.966	137.356	16172	71.725					Q2/2019	634.406	460.724	173.682	634.406	3.88746	-4.09406e-05	173.682	-0.0001				Q2/2019	3.8875
Q3/2019	2019-09-30	643.965	97.888	119.027	174.928	73.148	137.766	16072	72.443					Q3/2019	640.304	465.376	174.928	640.304	3.77094	-6.4348e-05	174.928	0.0002				Q3/2019	3.771
Q4/2019	2019-12-31	650.311	97.741	119.86	176.182	73.33	138.178	15702	73.167					Q4/2019	646.258	470.076	176.183	646.258	3.77169	-1.48146e-05	176.182	0.0006				Q4/2019	3.7717

## Sheet: Total Non-Res GFCF
Q1/1960 !Q mag=bil	.excel_last	Q111IBGV@OUTLOOK		Q132ibgv@OUTLOOK		Q136ibgv@OUTLOOK	Q156ibgv@OUTLOOK	Q158ibgv@OUTLOOK	Q184ibgv@OUTLOOK		Q134IBGV@OUTLOOK		(Q134IBGV@OUTLOOK) - historical	Comparison		Q112IBGV@OUTLOOK		(Q112IBGV@OUTLOOK) - historical	Comparison
.DESC		US: Private Non-Res & Gov Fixed Capital Formation, Volume(SAAR,Bil.Chn.2009.US$)	UK: Private Non-Res & Gov Fixed Capital Formation, Vol(SAAR,Bil.Chn.2015.Pound)	France: Private Non-Res & Gov Fixed Capital Form, Volume(SAAR,Bil.Chn.2010.Euro)	Germany: Government Final Consumption Expenditure, Volume(Bil.Ch.2010.EUR)	Italy: Private Non-Res & Gov Fixed Cap Formation, Vol(SAAR,Bil.Chn.2010.Euro)	Canada: Private Non-Res & Gov Fixed Capital Formation, Vol(SAAR,Bil.Chn.2007.C$)	Japan: Private Non-Res & Gov Fixed Capital Formation, Vol(SAAR,Bil.Chn.2011.Yen)	Spain: Private Non-Res & Gov Fixed Cap Formation, Vol(SAAR,Bil.Chn.2010.Euro)		Germany: Private Non-Res & Gov Fixed Capital Form, Vol(SAAR,Bil.Chn.2010.Euro)		Germany:Private Non-Residential&Govt Fixed Capital Form,Volume(Bil.Ch.2005.EUR)			UK: Private Non-Res & Gov Fixed Capital Formation, Vol(SAAR,Bil.Chn.2015.Pound)		UK: Private Non-Residential&Govt Fixed Capital Formation,Volume(Bil.Ch.2010.GBP)
.T1		Q1-1960	Q1-1966	Q1-1960	Q1-1960	Q1-1960	Q1-1961	Q1-1960	Q1-1960		Q1-1960		Q1-1960			Q1-1969		Q1-1966
.TN		Q4-2019	Q4-2019	Q4-2019	Q4-2019	Q4-2019	Q4-2019	Q4-2019	Q4-2019		Q4-2019		Q4-2015			Q4-2019		Q4-2015
.LSOURCE		Organization for Economic Cooperation & Development	Organization for Economic Cooperation & Development	Organization for Economic Cooperation & Development	Organization for Economic Cooperation & Devt	Organization for Economic Cooperation & Development	Organization for Economic Cooperation & Development	Organization for Economic Cooperation & Development	Organization for Economic Cooperation & Development		Organization for Economic Cooperation & Development	Historical Germany Series	Organization for Economic Cooperation & Devt			Organization for Economic Cooperation & Development	Historical UK Series	Organization for Economic Cooperation & Devt
.DTLM		May-30-2018 07:53	May-30-2018 07:53	May-30-2018 07:53		May-30-2018 07:53	May-30-2018 07:53	May-30-2018 07:53	May-30-2018 07:53		May-30-2018 07:53		May-09-2014 15:38			May-30-2018 07:53		May-09-2014 15:38
Q1/1960	1960-03-31	315.187	#N/A	59.7403	140.62	62.4887	#N/A	8707	10.5202		#N/A	114.687	114.687	#N/A		#N/A	#N/A	#N/A	#N/A
Q2/1960	1960-06-30	325.924	#N/A	61.7291	143.805	66.7614	#N/A	8829	11.2336		#N/A	117.285	117.285	#N/A		#N/A	#N/A	#N/A	#N/A
Q3/1960	1960-09-30	328.947	#N/A	63.4671	146.11	69.3763	#N/A	9544	11.7633		#N/A	119.165	119.165	#N/A		#N/A	#N/A	#N/A	#N/A
Q4/1960	1960-12-31	327.146	#N/A	64.7168	149.826	67.6159	#N/A	10295	12.1415		#N/A	122.195	122.195	#N/A		#N/A	#N/A	#N/A	#N/A
Q1/1961	1961-03-31	334.509	#N/A	68.6863	155.733	73.3497	29.587	10856	12.3681		#N/A	127.013	127.013	#N/A		#N/A	#N/A	#N/A	#N/A
Q2/1961	1961-06-30	331.549	#N/A	68.3933	155.34	72.9341	30.324	11323	12.7771		#N/A	126.692	126.692	#N/A		#N/A	#N/A	#N/A	#N/A
Q3/1961	1961-09-30	335.457	#N/A	70.5171	155.771	77.3157	31.236	12201	13.3684		#N/A	127.044	127.044	#N/A		#N/A	#N/A	#N/A	#N/A
Q4/1961	1961-12-31	348.425	#N/A	71.7952	158.724	77.8525	32.126	12967	14.1212		#N/A	129.453	129.453	#N/A		#N/A	#N/A	#N/A	#N/A
Q1/1962	1962-03-31	354.305	#N/A	73.8915	163.055	79.934	33.052	13105	15.0354		#N/A	132.985	132.985	#N/A		#N/A	#N/A	#N/A	#N/A
Q2/1962	1962-06-30	356.622	#N/A	74.9239	163.832	79.0977	32.464	13380	15.9028		#N/A	133.618	133.618	#N/A		#N/A	#N/A	#N/A	#N/A
Q3/1962	1962-09-30	364.843	#N/A	77.4052	164.112	78.8071	32.915	13691	16.7233		#N/A	133.847	133.847	#N/A		#N/A	#N/A	#N/A	#N/A
Q4/1962	1962-12-31	361.419	#N/A	77.2545	165.186	81.3252	33.113	13943	17.5291		#N/A	134.723	134.723	#N/A		#N/A	#N/A	#N/A	#N/A
Q1/1963	1963-03-31	354.104	#N/A	75.7498	152.734	81.1834	33.476	14215	18.3202		#N/A	124.567	124.567	#N/A		#N/A	#N/A	#N/A	#N/A
Q2/1963	1963-06-30	354.327	#N/A	81.231	167.467	83.742	33.816	14615	19.112		#N/A	136.583	136.583	#N/A		#N/A	#N/A	#N/A	#N/A
Q3/1963	1963-09-30	371.935	#N/A	83.3037	171.783	84.6715	34.659	14963	19.9047		#N/A	140.103	140.103	#N/A		#N/A	#N/A	#N/A	#N/A
Q4/1963	1963-12-31	372.505	#N/A	85.8317	175.251	85.6881	34.681	15846	20.6639		#N/A	142.932	142.932	#N/A		#N/A	#N/A	#N/A	#N/A
Q1/1964	1964-03-31	374.671	#N/A	87.8412	178.409	80.2129	36.155	16153	21.3897		#N/A	145.507	145.507	#N/A		#N/A	#N/A	#N/A	#N/A
Q2/1964	1964-06-30	389.863	#N/A	88.6676	185.155	73.3311	37.87	16479	22.2721		#N/A	151.01	151.01	#N/A		#N/A	#N/A	#N/A	#N/A
Q3/1964	1964-09-30	403.309	#N/A	90.404	187.15	67.2266	38.223	16994	23.3113		#N/A	152.637	152.637	#N/A		#N/A	#N/A	#N/A	#N/A
Q4/1964	1964-12-31	412.796	#N/A	90.2237	191.083	63.2731	39.986	17296	24.4783		#N/A	155.844	155.844	#N/A		#N/A	#N/A	#N/A	#N/A
Q1/1965	1965-03-31	431.325	#N/A	90.1716	191.672	61.9571	40.751	16974	25.7732		#N/A	156.324	156.324	#N/A		#N/A	#N/A	#N/A	#N/A
Q2/1965	1965-06-30	445.696	#N/A	92.1774	194.052	62.8244	42.044	16354	27.179		#N/A	158.266	158.266	#N/A		#N/A	#N/A	#N/A	#N/A
Q3/1965	1965-09-30	467.819	#N/A	92.4556	195.915	64.866	45.323	16542	28.6955		#N/A	159.785	159.785	#N/A		#N/A	#N/A	#N/A	#N/A
Q4/1965	1965-12-31	486.765	#N/A	92.7871	196.66	64.3019	48.411	16570	30.5129		#N/A	160.392	160.392	#N/A		#N/A	#N/A	#N/A	#N/A
Q1/1966	1966-03-31	511.386	76.7386	94.532	200.531	64.5608	50.774	17548	32.6312		#N/A	163.55	163.55	#N/A		#N/A	54.3044	54.3044	#N/A
Q2/1966	1966-06-30	520.575	77.5819	96.0083	198.675	67.0188	52.371	19850	33.9273		#N/A	162.036	162.036	#N/A		#N/A	54.9012	54.9012	#N/A
Q3/1966	1966-09-30	538.388	79.2281	98.8965	193.625	74.6349	54.968	20272	34.4013		#N/A	157.917	157.917	#N/A		#N/A	56.0661	56.0661	#N/A
Q4/1966	1966-12-31	553.649	80.2123	100.535	187.971	73.6439	56.532	20335	34.0589		#N/A	153.306	153.306	#N/A		#N/A	56.7626	56.7626	#N/A
Q1/1967	1967-03-31	553.455	85.6493	103.444	178.301	77.888	55.72	20792	32.9		#N/A	145.419	145.419	#N/A		#N/A	60.6101	60.6101	#N/A
Q2/1967	1967-06-30	534.985	89.131	104.291	174.702	81.8709	54.789	22326	32.0136		#N/A	142.484	142.484	#N/A		#N/A	63.074	63.074	#N/A
Q3/1967	1967-09-30	531.47	88.6281	104.713	173.17	83.749	51.608	23634	31.3998		#N/A	141.234	141.234	#N/A		#N/A	62.7181	62.7181	#N/A
Q4/1967	1967-12-31	533.19	87.1675	107.039	181.135	85.2957	50.394	24737	30.7117		#N/A	147.73	147.73	#N/A		#N/A	61.6845	61.6845	#N/A
Q1/1968	1968-03-31	542.635	92.6952	108.867	178.064	85.7865	51.677	26052	29.9493		#N/A	145.226	145.226	#N/A		#N/A	65.5962	65.5962	#N/A
Q2/1968	1968-06-30	534.892	90.237	99.2679	180.012	87.5317	49.016	26944	30.1045		#N/A	146.815	146.815	#N/A		#N/A	63.8566	63.8566	#N/A
Q3/1968	1968-09-30	537.473	90.4831	111.55	186.837	92.2066	49.603	27642	31.1771		#N/A	152.381	152.381	#N/A		#N/A	64.0308	64.0308	#N/A
Q4/1968	1968-12-31	543.613	94.6603	114.852	197.05	95.6875	48.842	29724	33.2654		#N/A	160.711	160.711	#N/A		#N/A	66.9868	66.9868	#N/A
Q1/1969	1969-03-31	558.218	89.2383	114.361	200.268	87.1698	48.757	29826	36.3694		#N/A	163.335	163.335	#N/A		89.2383	63.1499	63.1499	0
Q2/1969	1969-06-30	550.887	91.5036	119.895	207.777	94.8638	48.31	31717	38.9083		#N/A	169.459	169.459	#N/A		91.5036	64.2077	64.2077	0.863422
Q3/1969	1969-09-30	563.636	94.7989	120.358	216.796	95.3111	49.553	34038	40.8819		#N/A	176.815	176.815	#N/A		94.7989	66.6425	66.6425	0.700531
Q4/1969	1969-12-31	552.253	95.017	118.011	216.012	89.0932	50.834	36429	42.61		#N/A	176.176	176.176	#N/A		95.017	67.1941	67.1941	0.0714555
Q1/1970	1970-03-31	554.387	91.9224	120.419	204.526	103.827	52.111	37455	45.8153		#N/A	166.808	166.808	#N/A		91.9224	65.4172	65.4172	-0.582557
Q2/1970	1970-06-30	553.563	97.7105	122.374	239.207	102.234	53.136	38052	45.1923		#N/A	195.093	195.093	#N/A		97.7105	68.8551	68.8551	0.459529
Q3/1970	1970-09-30	553.91	97.358	122.872	253.054	105.288	54.021	39867	44.4282		#N/A	206.386	206.386	#N/A		97.358	68.599	68.599	0.470062
Q4/1970	1970-12-31	524.96	98.8707	125.767	245.275	103.682	52.653	39939	43.7477		#N/A	200.042	200.042	#N/A		98.8707	69.879	69.879	0.138263
Q1/1971	1971-03-31	507.532	95.1965	125.594	236.123	106.764	53.207	40070	43.0093		#N/A	192.578	192.578	#N/A		95.1965	67.3929	67.3929	-0.0422042
Q2/1971	1971-06-30	500.348	95.4066	129.751	239.28	103.597	53.938	40686	43.483		#N/A	195.153	195.153	#N/A		95.4066	67.4768	67.4768	0.0603743
Q3/1971	1971-09-30	496.748	94.4762	133.792	234.576	104.49	54.411	40872	43.9745		#N/A	191.316	191.316	#N/A		94.4762	66.961	66.961	-0.165441
Q4/1971	1971-12-31	495.052	94.5676	135.623	223.347	105.893	55.067	40990	45.532		#N/A	182.158	182.158	#N/A		94.5676	67.0395	67.0395	-0.187326
Q1/1972	1972-03-31	497.067	91.7504	135.472	217.923	109.017	54.628	43264	47.8989		#N/A	177.734	177.734	#N/A		91.7504	65.032	65.032	-0.165322
Q2/1972	1972-06-30	503.791	92.9067	136.649	212.02	109.067	54.972	42901	50.9119		#N/A	172.92	172.92	#N/A		92.9067	66.0768	66.0768	-0.524054
Q3/1972	1972-09-30	502.031	91.4253	138.183	213.002	114.46	54.079	43156	52.8312		#N/A	173.721	173.721	#N/A		91.4253	65.017	65.017	-0.505874
Q4/1972	1972-12-31	531.362	93.559	140.695	210.709	116.906	53.599	44650	54.5099		#N/A	171.85	171.85	#N/A		93.559	66.3264	66.3264	-0.18834
Q1/1973	1973-03-31	560.158	102.543	142.136	216.648	117.727	56.25	47820	56.6736		#N/A	176.694	176.694	#N/A		102.543	73.0765	73.0765	-0.810037
Q2/1973	1973-06-30	583.239	100.087	143.719	207.572	119.618	57.576	47494	58.36		#N/A	169.292	169.292	#N/A		100.087	70.8498	70.8498	-0.0357157
Q3/1973	1973-09-30	591.623	101.883	147.028	210.669	127.042	60.47	48077	59.2673		#N/A	171.818	171.818	#N/A		101.883	72.2277	72.2277	-0.205751
Q4/1973	1973-12-31	605.973	102.931	147.79	209.728	130.712	62.755	47912	61.0407		#N/A	171.05	171.05	#N/A		102.931	72.8636	72.8636	-0.0385601
Q1/1974	1974-03-31	621.892	105.661	146.471	232.374	128.78	62.924	43950	63.0251		#N/A	189.52	189.52	#N/A		105.661	75.2676	75.2676	-0.78559
Q2/1974	1974-06-30	634.103	99.2226	148.371	216.652	125.878	62.986	45661	64.0881		#N/A	176.697	176.697	#N/A		99.2226	71.4334	71.4334	-1.92884
Q3/1974	1974-09-30	626.671	104.423	146.534	222.98	133.449	65.783	44214	64.3259		#N/A	181.859	181.859	#N/A		104.423	74.0134	74.0134	-0.186819
Q4/1974	1974-12-31	622.959	103.273	141.736	222.974	124.893	67.794	44486	63.9589		#N/A	181.854	181.854	#N/A		103.273	73.8169	73.8169	-1.16423
Q1/1975	1975-03-31	603.185	99.5052	139.655	234.759	120.795	70.022	43833	63.2762		#N/A	191.465	191.465	#N/A		99.5052	71.4626	71.4626	-1.6584
Q2/1975	1975-06-30	572.502	99.1816	140.715	216.65	119.53	71.617	44223	62.3766		#N/A	176.696	176.696	#N/A		99.1816	71.0631	71.0631	-1.38841
Q3/1975	1975-09-30	586.57	100.395	138.703	223.186	120.988	70.856	43894	62.4224		#N/A	182.026	182.026	#N/A		100.395	71.6346	71.6346	-0.93333
Q4/1975	1975-12-31	596.119	98.8996	143.872	225.167	121.55	70.271	43741	61.641		#N/A	183.642	183.642	#N/A		98.8996	70.6635	70.6635	-1.07163
Q1/1976	1976-03-31	599.789	100.243	149.308	222.967	123.938	69.745	44524	61.3036		#N/A	181.848	181.848	#N/A		100.243	71.801	71.801	-1.3675
Q2/1976	1976-06-30	587.716	100.95	147.358	226.675	122.09	69.571	44247	61.4363		#N/A	184.872	184.872	#N/A		100.95	72.5652	72.5652	-1.78548
Q3/1976	1976-09-30	598.293	100.187	145.198	219.207	126.1	65.475	44318	61.5832		#N/A	178.782	178.782	#N/A		100.187	71.7136	71.7136	-1.29162
Q4/1976	1976-12-31	588.619	98.7002	142.709	222.688	131.011	68.341	43235	61.7546		#N/A	181.62	181.62	#N/A		98.7002	71.0452	71.0452	-1.89952
Q1/1977	1977-03-31	610.911	93.9269	146.382	231.155	132.308	69.651	44763	61.9827		#N/A	188.526	188.526	#N/A		93.9269	67.8409	67.8409	-2.17433
Q2/1977	1977-06-30	615.624	97.5187	144.792	223.114	132.5	70.054	45280	61.3577		#N/A	181.968	181.968	#N/A		97.5187	70.8685	70.8685	-2.94369
Q3/1977	1977-09-30	623.106	94.0895	144.947	224.651	129.496	71.149	46466	61.2471		#N/A	183.222	183.222	#N/A		94.0895	68.3836	68.3836	-2.85151
Q4/1977	1977-12-31	639.953	96.5528	143.171	230.902	129.778	70.79	46761	61.8723		#N/A	188.319	188.319	#N/A		96.5528	70.3413	70.3413	-3.19123
Q1/1978	1978-03-31	642.714	96.763	143.342	236.673	128.054	69.817	47098	62.2511		#N/A	193.027	193.027	#N/A		96.763	70.7401	70.7401	-3.5872
Q2/1978	1978-06-30	711.284	97.2317	145.574	235.107	130.734	71.936	49831	61.74		#N/A	191.749	191.749	#N/A		97.2317	71.1283	71.1283	-3.6767
Q3/1978	1978-09-30	738.439	94.4749	144.596	244.461	134.348	72.53	50601	61.0708		#N/A	199.378	199.378	#N/A		94.4749	69.2412	69.2412	-3.77767
Q4/1978	1978-12-31	766.885	92.3538	146.839	245.688	138.781	74.275	52246	60.3654		#N/A	200.379	200.379	#N/A		92.3538	67.5701	67.5701	-3.50832
Q1/1979	1979-03-31	770.594	95.5272	144.533	233.638	137.446	75.887	54073	59.5851		#N/A	190.551	190.551	#N/A		95.5272	70.0887	70.0887	-3.94051
Q2/1979	1979-06-30	780.576	96.6526	146.931	254.25	139.805	78.115	53917	59.324		#N/A	207.362	207.362	#N/A		96.6526	70.9796	70.9796	-4.09017
Q3/1979	1979-09-30	817.722	98.8875	151.915	257.042	145.258	83.724	54211	59.7428		#N/A	209.639	209.639	#N/A		98.8875	72.5697	72.5697	-4.10373
Q4/1979	1979-12-31	823.66	95.9285	154.915	259.234	151.788	84.581	55328	60.5732		#N/A	211.426	211.426	#N/A		95.9285	70.5567	70.5567	-4.23191
Q1/1980	1980-03-31	848.988	93.0344	155.679	263.196	146.415	87.591	55699	62.4126		#N/A	214.658	214.658	#N/A		93.0344	68.4164	68.4164	-4.08579
Q2/1980	1980-06-30	821.675	91.8375	156.465	251.55	146.044	89.304	55363	61.778		#N/A	205.16	205.16	#N/A		91.8375	67.8264	67.8264	-4.49274
Q3/1980	1980-09-30	816.549	90.1221	157.418	249.975	145.923	92.198	55455	59.625		#N/A	203.875	203.875	#N/A		90.1221	66.3306	66.3306	-4.04636
Q4/1980	1980-12-31	824.729	87.1005	156.395	242.99	147.928	93.708	57857	61.2451		#N/A	198.178	198.178	#N/A		87.1005	64.3621	64.3621	-4.31517
Q1/1981	1981-03-31	844.703	81.6056	156.298	243.872	144.85	98.339	59046	59.032		#N/A	198.898	198.898	#N/A		81.6056	60.4732	60.4732	-4.31452
Q2/1981	1981-06-30	854.639	81.0766	156.597	245.712	144.507	99.971	58095	59.8516		#N/A	200.399	200.399	#N/A		81.0766	60.0536	60.0536	-4.24287
Q3/1981	1981-09-30	876.236	78.7747	156.587	238.679	144.771	100.705	58941	60.0939		#N/A	194.662	194.662	#N/A		78.7747	58.794	58.794	-4.82774
Q4/1981	1981-12-31	908.169	78.7748	159.377	224.87	141.962	103.812	59433	58.8038		#N/A	183.4	183.4	#N/A		78.7748	58.9422	58.9422	-5.06231
Q1/1982	1982-03-31	886.54	79.6044	160.182	225.053	143.669	99.824	58821	60.4851		#N/A	183.549	183.549	#N/A		79.6044	58.8879	58.8879	-4.04668
Q2/1982	1982-06-30	868.574	78.8667	163.192	228.771	139.492	95.235	59773	60.2866		#N/A	186.582	186.582	#N/A		78.8667	59.9099	59.9099	-6.49171
Q3/1982	1982-09-30	840.655	84.0966	160.093	222.273	138.622	89.621	59474	60.9999		#N/A	181.282	181.282	#N/A		84.0966	62.5976	62.5976	-4.88718
Q4/1982	1982-12-31	829.033	84.6823	159.899	220.245	138.044	88.584	58498	61.8245		#N/A	179.628	179.628	#N/A		84.6823	62.9967	62.9967	-4.86283
Q1/1983	1983-03-31	803.295	87.7561	158.337	215.538	135.079	84.951	57769	62.6017		#N/A	175.789	175.789	#N/A		87.7561	64.1921	64.1921	-3.3113
Q2/1983	1983-06-30	804.583	83.9447	156.278	220.992	133.516	81.995	59220	61.5263		#N/A	180.237	180.237	#N/A		83.9447	62.6841	62.6841	-5.19437
Q3/1983	1983-09-30	835.87	86.7635	155.716	218.133	132.77	83.428	59562	61.3481		#N/A	177.906	177.906	#N/A		86.7635	63.8355	63.8355	-3.85892
Q4/1983	1983-12-31	882.273	92.5912	155.822	224.011	133.774	87.23	59429	59.1042		#N/A	182.699	182.699	#N/A		92.5912	68.4559	68.4559	-4.64499
Q1/1984	1984-03-31	912.438	93.6221	157.9	210.795	136.578	87.472	60771	59.4643		#N/A	171.921	171.921	#N/A		93.6221	68.7031	68.7031	-3.88122
Q2/1984	1984-06-30	956.178	96.6909	156.009	199.565	140.219	87.367	63974	56.8267		#N/A	162.762	162.762	#N/A		96.6909	71.8895	71.8895	-5.4881
Q3/1984	1984-09-30	987.71	99.5396	158.366	221.262	145.16	87.451	62938	57.2652		#N/A	180.457	180.457	#N/A		99.5396	73.7564	73.7564	-5.25216
Q4/1984	1984-12-31	1022.94	102.274	161.237	231.627	144.353	87.311	64467	57.7419		#N/A	188.911	188.911	#N/A		102.274	75.7436	75.7436	-5.33458
Q1/1985	1985-03-31	1034.85	109.199	161.514	217.543	144.005	90.956	66602	59.375		#N/A	177.425	177.425	#N/A		109.199	81.7356	81.7356	-7.06311
Q2/1985	1985-06-30	1062.89	100.661	167.089	232.446	146.272	96.62	67696	58.8219		#N/A	189.579	189.579	#N/A		100.661	74.8234	74.8234	-5.68482
Q3/1985	1985-09-30	1059.02	103.495	170.051	237.415	147.167	96.978	70398	61.8972		#N/A	193.632	193.632	#N/A		103.495	76.9438	76.9438	-5.86723
Q4/1985	1985-12-31	1069.04	104.148	170.642	248.802	148.567	94.537	71014	65.6464		#N/A	202.919	202.919	#N/A		104.148	77.2319	77.2319	-5.59203
Q1/1986	1986-03-31	1056.51	105.082	171.672	235.767	153.362	97.035	70646	67.7297		#N/A	192.288	192.288	#N/A		105.082	77.9498	77.9498	-5.68199
Q2/1986	1986-06-30	1036.29	101.569	175.889	251.59	154.714	94.399	72588	69.6402		#N/A	205.192	205.192	#N/A		101.569	74.369	74.369	-3.94821
Q3/1986	1986-09-30	1039.37	106.018	178.589	250.559	156.21	91.839	73025	70.4261		#N/A	204.351	204.351	#N/A		106.018	78.6403	78.6403	-5.7261
Q4/1986	1986-12-31	1039.92	107.617	180.108	261.228	157.714	91.058	73942	73.0044		#N/A	213.053	213.053	#N/A		107.617	80.8144	80.8144	-7.3768
Q1/1987	1987-03-31	1020.19	105.476	178.844	234.074	161.891	91.304	72852	76.1255		#N/A	190.907	190.907	#N/A		105.476	77.6268	77.6268	-4.72911
Q2/1987	1987-06-30	1047.81	107.842	184.865	261.842	168.902	95.985	74056	79.6272		#N/A	213.553	213.553	#N/A		107.842	81.9665	81.9665	-8.94928
Q3/1987	1987-09-30	1081.9	117.588	189.967	264.814	167.031	101.655	76654	81.3485		#N/A	215.978	215.978	#N/A		117.588	88.4954	88.4954	-8.36748
Q4/1987	1987-12-31	1076.86	124.961	195.271	264.585	170.647	105.371	79263	85.0859		#N/A	215.791	215.791	#N/A		124.961	92.654	92.654	-6.69028
Q1/1988	1988-03-31	1075.16	124.135	199.905	259.46	180.334	109.793	82051	86.1901		#N/A	211.611	211.611	#N/A		124.135	92.5671	92.5671	-7.47828
Q2/1988	1988-06-30	1102.71	125.62	205.625	263.957	183.006	110.647	84334	90.1717		#N/A	215.279	215.279	#N/A		125.62	95.8376	95.8376	-10.9926
Q3/1988	1988-09-30	1106.09	124.947	207.537	270.089	185.257	117.693	88557	92.5373		#N/A	220.28	220.28	#N/A		124.947	97.0113	97.0113	-13.6052
Q4/1988	1988-12-31	1119.34	128.075	211.368	269.507	184.501	113.762	89890	98.669		#N/A	219.805	219.805	#N/A		128.075	98.6994	98.6994	-12.7734
Q1/1989	1989-03-31	1135.22	138.126	216.994	287.848	190.274	118.272	96749	101.385		#N/A	234.764	234.764	#N/A		138.126	103.563	103.563	-9.2128
Q2/1989	1989-06-30	1155.55	141.594	218.203	274.574	190.707	119.829	92928	106.568		#N/A	223.937	223.937	#N/A		141.594	106.807	106.807	-10.4627
Q3/1989	1989-09-30	1192.65	149.408	221.737	283.585	192.032	118.501	96393	108.847		#N/A	231.287	231.287	#N/A		149.408	111.928	111.928	-9.81493
Q4/1989	1989-12-31	1180.47	150.267	227.355	288.383	198.975	122.575	100461	107.883		#N/A	235.2	235.2	#N/A		150.267	111.357	111.357	-7.94893
Q1/1990	1990-03-31	1205.91	153.41	233.248	309.664	201.83	121.637	101641	107.776		#N/A	252.557	252.557	#N/A		153.41	111.287	111.287	-4.31662
Q2/1990	1990-06-30	1192.36	152.139	235.826	295.298	203.446	121.602	103977	111.272		#N/A	240.84	240.84	#N/A		152.139	111.786	111.786	-6.53051
Q3/1990	1990-09-30	1203.31	150.3	238.944	299.408	200.358	121.208	106647	114.82		#N/A	244.192	244.192	#N/A		150.3	110.6	110.6	-6.71279
Q4/1990	1990-12-31	1196.06	149.204	239.377	305.902	198.82	119.822	109036	116.836		#N/A	249.489	249.489	#N/A		149.204	109.396	109.396	-6.0338
Q1/1991	1991-03-31	1168.58	141.898	238.526	310.716	200.979	125.815	110784	114.243		310.716	253.415	253.415	0		141.898	105.532	105.532	-8.103
Q2/1991	1991-06-30	1164.17	142.569	241.662	314.703	201.846	122.696	108358	117.1		314.703	255.248	255.248	0.559909		142.569	103.536	103.536	-4.18993
Q3/1991	1991-09-30	1152.75	140.615	241.784	320.399	203.925	121.521	109699	116.085		320.399	256.79	256.79	1.78423		140.615	101.239	101.239	-2.74155
Q4/1991	1991-12-31	1146.19	141.461	242.538	325.205	202.321	122.263	111245	118.965		325.205	262.18	262.18	1.20403		141.461	102.12	102.12	-3.19071
Q1/1992	1992-03-31	1147.7	141.129	243.964	327.339	201.768	119.175	108178	120.48		327.339	267.688	267.688	-0.282565		141.129	104.114	104.114	-6.71966
Q2/1992	1992-06-30	1174.57	141.562	241.887	325.438	201.783	112.276	111093	113.269		325.438	264.854	264.854	0.224135		141.562	101.877	101.877	-2.69285
Q3/1992	1992-09-30	1187.34	139.868	238.516	318.799	193.039	113.884	109527	109.994		318.799	256.469	256.469	1.39627		139.868	101.346	101.346	-3.74967
Q4/1992	1992-12-31	1208.05	138.727	235.388	309.153	189.181	106.948	106176	101.421		309.153	250.55	250.55	0.627301		138.727	98.9207	98.9207	-1.18714
Q1/1993	1993-03-31	1206.77	142.388	231.052	300.411	175.946	107.992	110608	98.5581		300.411	243.85	243.85	0.457828		142.388	102.728	102.728	-3.11478
Q2/1993	1993-06-30	1236.18	136.22	226.696	295.169	167.251	112.122	106255	99.3734		295.169	239.255	239.255	0.583959		136.22	98.8714	98.8714	-3.9193
Q3/1993	1993-09-30	1238.39	135.369	223.721	295.218	162.4	115.763	102452	100.381		295.218	237.257	237.257	1.3882		135.369	98.9439	98.9439	-4.98773
Q4/1993	1993-12-31	1278.93	134.547	222.348	285.032	160.887	117.963	98909	96.7501		285.032	230.361	230.361	0.831373		134.547	98.8016	98.8016	-5.68263
Q1/1994	1994-03-31	1272.94	143.051	225.297	290.06	163.376	117.588	101429	95.7957		290.06	235.575	235.575	0.392169		143.051	104.266	104.266	-4.80676
Q2/1994	1994-06-30	1297.67	140.064	227.506	290.427	170.124	122.098	101858	99.1357		290.427	236.78	236.78	0.0343877		140.064	104.09	104.09	-7.87424
Q3/1994	1994-09-30	1331.92	143.338	228.997	293.474	171.479	123.776	99944	102.731		293.474	238.547	238.547	0.317753		143.338	105.193	105.193	-5.95331
Q4/1994	1994-12-31	1374.63	145.861	229.057	297.329	176.256	128.2	100822	105.342		297.329	242.608	242.608	-0.0437612		145.861	108.004	108.004	-7.57761
Q1/1995	1995-03-31	1422.42	144.431	230.739	291.026	178.96	127.823	101144	109.64		291.026	236.061	236.061	0.511172		144.431	106.476	106.476	-6.75907
Q2/1995	1995-06-30	1440.47	146.899	229.867	293.548	183.93	130.724	105447	108.96		293.548	239.494	239.494	-0.0320162		146.899	110.019	110.019	-9.60462
Q3/1995	1995-09-30	1440.78	150.844	230.285	294.552	190.105	130.891	109658	107.572		294.552	238.983	238.983	0.49283		150.844	112.475	112.475	-9.07254
Q4/1995	1995-12-31	1460.55	152.803	231.326	292.405	198.826	131.592	110768	107.608		292.405	236.973	236.973	0.594797		152.803	114.257	114.257	-9.69856
Q1/1996	1996-03-31	1491.88	152.012	233.287	278.107	193.891	133.975	112153	108.204		278.107	224.499	224.499	0.915475		152.012	116.651	116.651	-14.3757
Q2/1996	1996-06-30	1527.54	157.098	232.225	295.529	193.491	130.795	113651	108.552		295.529	241.075	241.075	-0.0181557		157.098	119.338	119.338	-12.9317
Q3/1996	1996-09-30	1571.72	154.494	232.697	295.834	194.059	134.985	112738	109.9		295.834	239.712	239.712	0.617558		154.494	118.858	118.858	-15.0913
Q4/1996	1996-12-31	1609.49	142.411	231.267	296.215	191.653	142.413	111577	109.384		296.215	240.681	240.681	0.357704		142.411	112.68	112.68	-18.8474
Q1/1997	1997-03-31	1643.23	153.292	227.694	290.086	194.574	146.239	111908	112.9		290.086	234.27	234.27	0.91502		153.292	110.136	110.136	-2.62582
Q2/1997	1997-06-30	1668.77	159.672	231.273	293.415	197.738	151.299	112631	114.924		293.415	238.699	238.699	0.23859		159.672	128.552	128.552	-24.6388
Q3/1997	1997-09-30	1732.6	166.716	231.649	294.972	199.415	157.557	113693	116.72		294.972	240.268	240.268	0.120483		166.716	128.964	128.964	-17.3977
Q4/1997	1997-12-31	1734.53	168.076	235.871	299.265	206.437	159.573	113757	120.124		299.265	244.631	244.631	-0.219554		168.076	130.948	130.948	-19.0154
Q1/1998	1998-03-31	1775.81	172.788	240.644	309.024	206.144	161.024	110555	124.392		309.024	250.898	250.898	0.448466		172.788	136.876	136.876	-23.1224
Q2/1998	1998-06-30	1839.45	175.068	246.036	306.759	208.859	162.622	109607	126.408		306.759	250.509	250.509	-0.12716		175.068	140.612	140.612	-26.4835
Q3/1998	1998-09-30	1877.35	174.84	250.389	311.688	211.44	163.864	110727	129.58		311.688	254.726	254.726	-0.204691		174.84	143.772	143.772	-31.743
Q4/1998	1998-12-31	1917.48	182.928	253.599	312.382	214.294	167.142	112401	134.868		312.382	254.453	254.453	0.126181		182.928	150.376	150.376	-33.1373
Q1/1999	1999-03-31	1954.75	179.584	259.436	324.361	215.27	168.578	110551	137.712		324.361	263.194	263.194	0.532594		179.584	148.544	148.544	-33.9835
Q2/1999	1999-06-30	2002.78	179.264	264.171	325.509	217.579	172.079	110071	141.868		325.509	264.99	264.99	0.193254		179.264	148.56	148.56	-34.3674
Q3/1999	1999-09-30	2054.67	181.856	269.124	332.08	221.958	173.198	108256	142.04		332.08	271.504	271.504	-0.262291		181.856	147.088	147.088	-29.1319
Q4/1999	1999-12-31	2071.37	174.44	274.354	332.89	226.342	178.167	109195	143.076		332.89	270.942	270.942	0.219911		174.44	141.156	141.156	-28.0487
Q1/2000	2000-03-31	2133.68	181.128	280.572	343.133	233.146	181.412	109883	138.892		343.133	281.458	281.458	-0.633315		181.128	146.324	146.324	-28.7379
Q2/2000	2000-06-30	2183.02	194.816	284.686	344.65	236.252	182.646	108465	140.984		344.65	282.838	282.838	-0.689424		194.816	149.4	149.4	-18.2701
Q3/2000	2000-09-30	2206.7	175.652	292.3	351.507	239.607	182.618	110563	142.984		351.507	288.413	288.413	-0.68266		175.652	151.356	151.356	-42.8426
Q4/2000	2000-12-31	2213.94	181.744	295.307	352.135	238.882	182.401	111782	145.08		352.135	287.882	287.882	-0.271305		181.744	140.964	140.964	-19.5598
Q1/2001	2001-03-31	2204.84	176.44	297.104	356.188	242.555	187.305	113631	145.608		356.188	290.02	290.02	0.189741		176.44	147.296	147.296	-35.5304
Q2/2001	2001-06-30	2186.55	184.808	296.275	348.154	246.035	189.05	109525	147.68		348.154	282.927	282.927	0.403206		184.808	142.116	142.116	-17.9506
Q3/2001	2001-09-30	2145.5	176.872	296.441	341.256	245.064	190.286	108208	148.016		341.256	276.286	276.286	0.803511		176.872	156.808	156.808	-50.1089
Q4/2001	2001-12-31	2116.57	169.528	294.935	336.839	245.466	179.357	104164	148.792		336.839	272.203	272.203	0.993389		169.528	134.856	134.856	-23.5768
Q1/2002	2002-03-31	2092.4	170.784	290.699	331.049	252.44	175.228	104021	150.02		331.049	266.514	266.514	1.3745		170.784	158.108	158.108	-58.9896
Q2/2002	2002-06-30	2074.53	178.704	287.094	325.72	251.509	177.188	102007	151.752		325.72	262.312	262.312	1.31803		178.704	127.384	127.384	-1.46204
Q3/2002	2002-09-30	2073.69	176.976	289.19	324.424	256.91	179.781	102931	153.792		324.424	262.255	262.255	0.9231		176.976	147.368	147.368	-35.0438
Q4/2002	2002-12-31	2058.85	184.712	291.214	322.751	263.64	178.483	102613	155.116		322.751	261.206	261.206	0.798602		184.712	143.292	143.292	-19.9204
Q1/2003	2003-03-31	2062.53	188.368	291.828	324.709	252.958	181.727	101651	159.4		324.709	261.399	261.399	1.35258		188.368	155.716	155.716	-35.4973
Q2/2003	2003-06-30	2105.06	175.696	291.101	322.161	251.669	185.887	102962	161.388		322.161	260.157	260.157	1.0229		175.696	142.672	142.672	-29.0419
Q3/2003	2003-09-30	2147.78	172.732	297	321.524	251.101	190.72	100833	162.668		321.524	260.465	260.465	0.696261		172.732	140.496	140.496	-28.9175
Q4/2003	2003-12-31	2169.33	170.96	297.275	321.133	253.275	195.83	103395	165.312		321.133	260.937	260.937	0.384091		170.96	135.68	135.68	-23.2769
Q1/2004	2004-03-31	2152.03	177.784	300.49	322.663	257.08	200.044	101843	167.068		322.663	258.445	258.445	1.85989		177.784	146.792	146.792	-33.2262
Q2/2004	2004-06-30	2195.26	179.208	301.371	321.356	256.812	202.65	101552	168.612		321.356	258.924	258.924	1.25041		179.208	152.68	152.68	-40.9543
Q3/2004	2004-09-30	2238.16	174.68	302.153	326.933	253.984	206.162	101740	172.792		326.933	263.732	263.732	1.14799		174.68	141.2	141.2	-27.8494
Q4/2004	2004-12-31	2266.98	177.504	306.287	324.954	255.811	209.385	102896	174.476		324.954	262.428	262.428	1.02544		177.504	145.312	145.312	-31.1964
Q1/2005	2005-03-31	2286.15	183.62	307.431	324.937	256.661	217.99	104679	178.98		324.937	261.941	261.941	1.21243		183.62	160.684	160.684	-48.6849
Q2/2005	2005-06-30	2316.89	192.696	308.74	329.957	256.746	222.712	105629	183.76		329.957	266.566	266.566	1.0025		192.696	143.564	143.564	-11.4043
Q3/2005	2005-09-30	2351.99	190.988	311.669	335.27	258.033	231.33	107530	186.448		335.27	269.788	269.788	1.44108		190.988	150.504	150.504	-24.308
Q4/2005	2005-12-31	2361.98	187.204	312.491	345.927	257.993	238.205	105696	188.924		345.927	280.565	280.565	0.618609		187.204	139.452	139.452	-11.0471
Q1/2006	2006-03-31	2430.44	188.488	313.298	345.552	261.187	240.669	105930	192.676		345.552	280.202	280.202	0.641195		188.488	152.404	152.404	-30.1182
Q2/2006	2006-06-30	2462.73	190.692	320.158	364.333	261.674	245.195	106513	198.14		364.333	298.126	298.126	-0.387625		190.692	144.204	144.204	-14.6634
Q3/2006	2006-09-30	2477.99	199.044	321.99	364.586	263.409	248.224	105191	200.548		364.586	297.817	297.817	-0.184147		199.044	138.176	138.176	4.24136
Q4/2006	2006-12-31	2489.02	202.544	328.669	377.259	270.891	250.306	107223	203.996		377.259	308.839	308.839	-0.45504		202.544	145.02	145.02	-2.67426
Q1/2007	2007-03-31	2518.82	203.52	335.138	380.888	270.452	251.195	107293	207.44		380.888	315.153	315.153	-1.77845		203.52	154.944	154.944	-17.2955
Q2/2007	2007-06-30	2564.85	211.4	339.799	383.539	267.332	253.216	105848	211.904		383.539	315.352	315.352	-1.00427		211.4	161.56	161.56	-18.9419
Q3/2007	2007-09-30	2594.13	202.132	345.334	384.688	268.73	254.927	104496	210.8		384.688	316.084	316.084	-0.923077		202.132	168.5	168.5	-40.3173
Q4/2007	2007-12-31	2627.26	222.764	348.838	397.715	266.335	258.766	105246	213.984		397.715	329.438	329.438	-2.00019		222.764	167.468	167.468	-15.563
Q1/2008	2008-03-31	2626.49	211.248	355.574	399.908	265.844	268.313	105375	212.272		399.908	331.544	331.544	-2.12556		211.248	190.628	190.628	-65.1424
Q2/2008	2008-06-30	2631.29	219.592	353.219	396.61	265.15	268.209	103163	214.78		396.61	326.488	326.488	-1.19158		219.592	182.284	182.284	-42.5792
Q3/2008	2008-09-30	2583.8	212.076	352.033	399.499	256.54	266.965	101712	207.82		399.499	327.644	327.644	-0.718028		212.076	168.148	168.148	-28.6167
Q4/2008	2008-12-31	2465.87	208.976	342.414	391.092	246.233	257.253	98642	200.812		391.092	321.046	321.046	-0.819797		208.976	154.228	154.228	-10.0478
Q1/2009	2009-03-31	2326.49	200.408	329.178	347.872	235.892	227.212	94887	185.352		347.872	282.491	282.491	0.484427		200.408	161.932	161.932	-31.8486
Q2/2009	2009-06-30	2285.24	185.628	321.193	347.62	230.92	222.447	94483	173.724		347.62	276.539	276.539	2.75186		185.628	161.188	161.188	-47.2328
Q3/2009	2009-09-30	2267.68	189.348	319.686	349.803	226.67	228.863	92246	175.564		349.803	277.417	277.417	3.10809		189.348	148.248	148.248	-22.5733
Q4/2009	2009-12-31	2242.48	188.316	321.181	346.991	234.51	238.158	91993	174.412		346.991	276.792	276.792	2.4497		188.316	155.456	155.456	-35.1438
Q1/2010	2010-03-31	2249.91	197.328	324.329	348.524	228.565	247.736	92398	175.416		348.524	278.75	278.75	2.17028		197.328	166.02	166.02	-41.7735
Q2/2010	2010-06-30	2310.57	193.864	327.797	367.939	229.381	256.787	91946	174.996		367.939	295.076	295.076	1.97623		193.864	150.724	150.724	-21.4335
Q3/2010	2010-09-30	2346.8	200.812	330.993	376.766	229.141	263.117	92680	173.22		376.766	301.88	301.88	2.13242		200.812	162.12	162.12	-31.6936
Q4/2010	2010-12-31	2373.43	203.908	333.165	374.09	233.692	270.304	91818	173.608		374.09	300.137	300.137	1.95885		203.908	154.836	154.836	-16.6897
Q1/2011	2011-03-31	2346.38	200.124	333.658	387.527	232.107	272.596	92429	169.892		387.527	312.041	312.041	1.58608		200.124	148.588	148.588	-11.0361
Q2/2011	2011-06-30	2380.18	197.224	335.302	388.615	231.478	275.985	92026	167.86		388.615	310.586	310.586	2.51046		197.224	157.56	157.56	-28.4933
Q3/2011	2011-09-30	2453.19	204.176	336.784	394.189	229.639	274.744	93161	166.652		394.189	313.562	313.562	3.13004		204.176	154.76	154.76	-16.2691
Q4/2011	2011-12-31	2492.17	207.804	343.895	390.62	229.169	277.457	95582	163.392		390.62	314.033	314.033	1.79547		207.804	151.68	151.68	-7.32626
Q1/2012	2012-03-31	2528.76	209.008	341.336	387.651	214.251	283.467	97192	158.876		387.651	310.16	310.16	2.36847		209.008	163.604	163.604	-24.8591
Q2/2012	2012-06-30	2559.86	207.34	340.748	382.683	209.382	287.894	97401	154.868		382.683	302.965	302.965	3.6088		207.34	162.74	162.74	-25.3601
Q3/2012	2012-09-30	2537.55	204.804	341.998	383.91	205.835	287.945	96320	151.504		383.91	302.34	302.34	4.24987		204.804	158.672	158.672	-21.7601
Q4/2012	2012-12-31	2541.3	216.252	340.639	380.786	200.918	291.022	96103	149.456		380.786	301.368	301.368	3.62834		216.252	147.648	147.648	8.52533
Q1/2013	2013-03-31	2558.19	202.612	337.173	367.911	194.65	292.989	96758	150.42		367.911	295.545	295.545	1.78264		202.612	148.46	148.46	-8.04541
Q2/2013	2013-06-30	2566.82	209.616	337.762	379.355	193.458	291.083	99984	149.988		379.355	299.833	299.833	3.77321		209.616	152.844	152.844	-7.13898
Q3/2013	2013-09-30	2579.38	218.94	338.084	378.266	192.074	292.614	102933	154.148		378.266	301.713	301.713	2.68104		218.94	156.06	156.06	-1.7832
Q4/2013	2013-12-31	2618.98	218.768	341.018	389.129	188.43	294.374	104608	154.684		389.129	306.406	306.406	4.32508		218.768	159.48	159.48	-7.39162
Q1/2014	2014-03-31	2642.63	222.92	339.945	394.149	190.996	296.03	106432	153.736		394.149	311.149	311.149	4.0695		222.92	162.651	162.651	-7.76077
Q2/2014	2014-06-30	2700.23	225.136	340.637	393.05	190.051	296.786	103648	155.224		393.05	314.46	314.46	2.409		225.136	166.071	166.071	-10.6934
Q3/2014	2014-09-30	2754.17	226.472	343.385	389.772	190.392	299.855	105107	156.432		389.772	318.144	318.144	-0.0995955		226.472	169.595	169.595	-14.7755
Q4/2014	2014-12-31	2746.77	225.416	342.363	397.153	193.971	305.253	106089	158.684		397.153	321.963	321.963	0.768773		225.416	173.145	173.145	-21.5803
Q1/2015	2015-03-31	2753.1	234.044	345.18	395.498	195.349	285.758	108285	165.608		395.498	325.946	325.946	-1.33588		234.044	175.954	175.954	-16.361
Q2/2015	2015-06-30	2784.95	235.376	343.504	395.969	197.36	275.917	106976	170.524		395.969	330.098	330.098	-2.82226		235.376	178.88	178.88	-19.501
Q3/2015	2015-09-30	2794.19	226.056	348.074	400.065	198.49	267.262	107451	172.472		400.065	334.421	334.421	-3.2104		226.056	181.899	181.899	-34.7263
Q4/2015	2015-12-31	2760.14	224.46	352.985	411.279	198.644	265.446	107420	173.608		411.279	338.802	338.802	-1.33015		224.46	185.04	185.04	-41.4877
Q1/2016	2016-03-31	2751.26	224.172	357.185	415.617	200.926	259.774	107319	172.876		415.617					224.172			251.206
Q2/2016	2016-06-30	2756.81	230.48	356.812	408.516	199.717	257.372	108236	176.824		408.516					230.48			258.275
Q3/2016	2016-09-30	2766.85	232.888	356.985	410.746	205.056	260.263	107935	176.148		410.746					232.888			260.973
Q4/2016	2016-12-31	2773.65	231.508	357.978	408.896	211.57	253.404	108644	176.72		408.896					231.508			259.427
Q1/2017	2017-03-31	2818.4	228.728	364.117	421.764	205.197	258.48	109085	180.652		421.764					228.728			256.311
Q2/2017	2017-06-30	2848.57	237.52	366.938	427.754	209.322	262.162	111000	181.072		427.754					237.52			266.164
Q3/2017	2017-09-30	2867.92	237.5	370.152	430.003	217.646	266.633	111101	183.944		430.003					237.5			266.141
Q4/2017	2017-12-31	2922.17	240.44	375.056	431.326	221.946	271.731	111526	184.204		431.326					240.44			269.436
Q1/2018	2018-03-31	2957.33	241.816	377.456	437.093	224.146	274.747	111466	186.148		437.093					241.816			270.978
Q2/2018	2018-06-30	3001.74	242.164	381.673	441.772	226.38	277.692	112932	188.12		441.772					242.164			271.367
Q3/2018	2018-09-30	3036.55	242.905	385.943	446.535	228.634	280.732	113461	190.249		446.535					242.905			272.198
Q4/2018	2018-12-31	3071.76	243.691	390.224	451.412	230.907	283.809	113409	192.471		451.412					243.691			273.078
Q1/2019	2019-03-31	3107.39	244.399	394.477	456.024	232.977	286.869	113424	194.475		456.024					244.399			273.872
Q2/2019	2019-06-30	3143.44	245.017	398.676	460.724	235.064	289.699	113371	196.42		460.724					245.017			274.565
Q3/2019	2019-09-30	3179.91	245.582	402.819	465.376	237.167	292.398	113279	198.384		465.376					245.582			275.198
Q4/2019	2019-12-31	3216.8	246.151	406.941	470.076	239.286	295.068	113112	200.368		470.076					246.151			275.836

## Sheet: G
Q1/1960 !Q mag=bil	.excel_last	Q111gc@OUTLOOK	Q112gc@OUTLOOK	Q132gc@OUTLOOK		Q136gc@OUTLOOK	Q156gc@OUTLOOK	Q158gc@OUTLOOK	Q184gc@OUTLOOK			GERMANY	Q1/1960 !Q mag=bil	S134NCGC@G10	Q134GC@OUTLOOK					Q1/1960 !Q	Q134GCP@OUTLOOK					Q134GCP@OUTLOOK
.DESC		US: Government Final Consumption Expenditure, Volume(SAAR,Bil.Chn.2009.US$)	UK: Government Final Consumption Expenditure, Volume(SAAR,Bil.Chn.2015.Pound)	France: Government Final Consumption Expenditure, Volume(SAAR,Bil.Chn.2010.Euro)	Germany: Government Final Consumption Expenditure, Volume(Bil.Ch.2010.EUR)	Italy: Government Final Consumption Expenditure, Volume(SAAR,Bil.Euro)	Canada: Government Final Consumption Expenditure, Volume(SAAR,Bil.Chn.2007.C$)	Japan: Government Final Consumption Expenditure, Volume(SAAR,Bil.Chn.2011.Yen)	Spain: Government Final Consumption Expenditure, Volume(SAAR,Bil.Chn.2010.Euro)				.DESC	Germany: GDP: Government Consumption (SWDA, Bil.Chn.2010.Euros)	Germany: Government Final Consumption Expenditure, Vol(SAAR,Bil.Chn.2010.Euro)	Germany: Government Final Consumption Expenditure, Volume(Bil.Ch.2010.EUR)	Comparison			.DESC	Germany: Gov Final Consumption Expenditure Growth, Volume (Annualized % Change)	Comparison				Germany: Govt Final Consumption Expenditure Growth, Volume(Annualized % Change)
.T1		Q1-1960	Q1-1960	Q1-1960	Q1-1960	Q1-1960	Q1-1961	Q1-1960	Q1-1960				.T1	Q1-1970	Q1-1991					.T1	Q2-1991					Q2-1960
.TN		Q4-2019	Q4-2019	Q4-2019	Q4-2019	Q4-2019	Q4-2019	Q4-2019	Q4-2019				.TN	Q1-2018	Q4-2019					.TN	Q4-2019					Q4-2015
.LSOURCE		Organization for Economic Cooperation & Development	Organization for Economic Cooperation & Development	Organization for Economic Cooperation & Development	Organization for Economic Cooperation & Devt	Organization for Economic Cooperation & Development	Organization for Economic Cooperation & Development	Organization for Economic Cooperation & Development	Organization for Economic Cooperation & Development				.LSOURCE	Deutsche Bundesbank	Organization for Economic Cooperation & Development					.LSOURCE	Organization for Economic Cooperation & Development				Historical Germany Series	Organization for Economic Cooperation & Devt
.DTLM		May-30-2018 07:53	May-30-2018 07:53	May-30-2018 09:03		May-30-2018 07:53	May-30-2018 07:53	May-30-2018 07:53	May-30-2018 07:53				.DTLM	May-24-2018 01:20	May-30-2018 07:53					.DTLM	May-30-2018 07:53					May-09-2014 15:38
Q1/1960	1960-03-31	810.474	130.624	94.062	136.273	102.568	#N/A	16890	24.168				Q1/1960	#N/A	#N/A	#N/A	#N/A	#N/A		Q1/1960	#N/A	#N/A	#N/A		136.273	#N/A
Q2/1960	1960-06-30	820.865	131.236	94.651	136.806	103.794	#N/A	16743	24.277				Q2/1960	#N/A	#N/A	#N/A	#N/A	#N/A	#N/A	Q2/1960	#N/A	#N/A	#N/A		136.806	1.5735	#N/A
Q3/1960	1960-09-30	834.199	131.848	95.594	137.872	104.954	#N/A	16963	24.495				Q3/1960	#N/A	#N/A	#N/A	#N/A	#N/A	#N/A	Q3/1960	#N/A	#N/A	#N/A		137.872	3.153	#N/A
Q4/1960	1960-12-31	842.948	133.188	96.886	139.505	106.063	#N/A	17188	24.803				Q4/1960	#N/A	#N/A	#N/A	#N/A	#N/A	#N/A	Q4/1960	#N/A	#N/A	#N/A		139.505	4.8226	#N/A
Q1/1961	1961-03-31	833.177	134.644	98.54	141.705	107.34	80.057	17378	25.202				Q1/1961	#N/A	#N/A	#N/A	#N/A	#N/A	#N/A	Q1/1961	#N/A	#N/A	#N/A		141.705	6.4593	#N/A
Q2/1961	1961-06-30	850.316	136.056	100.266	144.267	108.385	80.438	17738	25.59				Q2/1961	#N/A	#N/A	#N/A	#N/A	#N/A	#N/A	Q2/1961	#N/A	#N/A	#N/A		144.267	7.4305	#N/A
Q3/1961	1961-09-30	861.107	137.588	102.066	147.191	109.426	83.601	17969	25.969				Q3/1961	#N/A	#N/A	#N/A	#N/A	#N/A	#N/A	Q3/1961	#N/A	#N/A	#N/A		147.191	8.3566	#N/A
Q4/1961	1961-12-31	873.319	137.588	103.938	150.68	110.485	83.267	18351	26.331				Q4/1961	#N/A	#N/A	#N/A	#N/A	#N/A	#N/A	Q4/1961	#N/A	#N/A	#N/A		150.68	9.8245	#N/A
Q1/1962	1962-03-31	892.459	139.716	105.86	154.734	111.376	83.942	18625	26.677				Q1/1962	#N/A	#N/A	#N/A	#N/A	#N/A	#N/A	Q1/1962	#N/A	#N/A	#N/A		154.734	11.2054	#N/A
Q2/1962	1962-06-30	904.071	140.748	107.594	158.339	112.532	86.675	19072	27.147				Q2/1962	#N/A	#N/A	#N/A	#N/A	#N/A	#N/A	Q2/1962	#N/A	#N/A	#N/A		158.339	9.648	#N/A
Q3/1962	1962-09-30	923.531	140.748	109.131	161.493	113.736	85.796	19422	27.742				Q3/1962	#N/A	#N/A	#N/A	#N/A	#N/A	#N/A	Q3/1962	#N/A	#N/A	#N/A		161.493	8.2092	#N/A
Q4/1962	1962-12-31	928.176	141.668	110.464	164.438	114.972	87.589	19710	28.516				Q4/1962	#N/A	#N/A	#N/A	#N/A	#N/A	#N/A	Q4/1962	#N/A	#N/A	#N/A		164.438	7.4979	#N/A
Q1/1963	1963-03-31	926.755	144.06	111.088	167.175	116.122	89.088	20009	29.468				Q1/1963	#N/A	#N/A	#N/A	#N/A	#N/A	#N/A	Q1/1963	#N/A	#N/A	#N/A		167.175	6.8259	#N/A
Q2/1963	1963-06-30	928.135	142.612	113.301	169.269	117.378	89.061	20718	30.134				Q2/1963	#N/A	#N/A	#N/A	#N/A	#N/A	#N/A	Q2/1963	#N/A	#N/A	#N/A		169.269	5.1054	#N/A
Q3/1963	1963-09-30	961.59	142.612	115.381	170.721	118.632	91.065	20870	30.514				Q3/1963	#N/A	#N/A	#N/A	#N/A	#N/A	#N/A	Q3/1963	#N/A	#N/A	#N/A		170.721	3.4736	#N/A
Q4/1963	1963-12-31	960.429	145.396	117.073	171.323	119.878	91.583	21037	30.61				Q4/1963	#N/A	#N/A	#N/A	#N/A	#N/A	#N/A	Q4/1963	#N/A	#N/A	#N/A		171.323	1.4189	#N/A
Q1/1964	1964-03-31	962.45	145.872	118.846	171.077	121.17	96.45	21351	30.421				Q1/1964	#N/A	#N/A	#N/A	#N/A	#N/A	#N/A	Q1/1964	#N/A	#N/A	#N/A		171.077	-0.5741	#N/A
Q2/1964	1964-06-30	968.857	145.876	120.339	171.651	122.389	94.827	20950	30.402				Q2/1964	#N/A	#N/A	#N/A	#N/A	#N/A	#N/A	Q2/1964	#N/A	#N/A	#N/A		171.651	1.3497	#N/A
Q3/1964	1964-09-30	968.537	147.572	122.037	173.046	123.601	94.112	21278	30.551				Q3/1964	#N/A	#N/A	#N/A	#N/A	#N/A	#N/A	Q3/1964	#N/A	#N/A	#N/A		173.046	3.2909	#N/A
Q4/1964	1964-12-31	963.832	147.232	123.545	175.199	124.814	96.975	21507	30.831				Q4/1964	#N/A	#N/A	#N/A	#N/A	#N/A	#N/A	Q4/1964	#N/A	#N/A	#N/A		175.199	5.0697	#N/A
Q1/1965	1965-03-31	967.556	143.204	124.872	178.109	125.983	98.222	21876	31.241				Q1/1965	#N/A	#N/A	#N/A	#N/A	#N/A	#N/A	Q1/1965	#N/A	#N/A	#N/A		178.109	6.8121	#N/A
Q2/1965	1965-06-30	981.01	153.484	126.318	180.486	127.222	98.917	21620	31.562				Q2/1965	#N/A	#N/A	#N/A	#N/A	#N/A	#N/A	Q2/1965	#N/A	#N/A	#N/A		180.486	5.4469	#N/A
Q3/1965	1965-09-30	1011.34	152.4	127.578	182.331	128.48	100.062	21942	31.793				Q3/1965	#N/A	#N/A	#N/A	#N/A	#N/A	#N/A	Q3/1965	#N/A	#N/A	#N/A		182.331	4.1506	#N/A
Q4/1965	1965-12-31	1039.95	152.184	128.843	183.724	129.754	102.312	22278	31.952				Q4/1965	#N/A	#N/A	#N/A	#N/A	#N/A	#N/A	Q4/1965	#N/A	#N/A	#N/A		183.724	3.0907	#N/A
Q1/1966	1966-03-31	1048.54	151.056	130.29	184.665	130.877	104.186	22592	32.04				Q1/1966	#N/A	#N/A	#N/A	#N/A	#N/A	#N/A	Q1/1966	#N/A	#N/A	#N/A		184.665	2.065	#N/A
Q2/1966	1966-06-30	1082.97	154.796	131.915	185.956	132.19	106.885	22838	32.168				Q2/1966	#N/A	#N/A	#N/A	#N/A	#N/A	#N/A	Q2/1966	#N/A	#N/A	#N/A		185.956	2.8272	#N/A
Q3/1966	1966-09-30	1104.84	156.86	133.685	187.598	133.566	109.585	23018	32.337				Q3/1966	#N/A	#N/A	#N/A	#N/A	#N/A	#N/A	Q3/1966	#N/A	#N/A	#N/A		187.598	3.5791	#N/A
Q4/1966	1966-12-31	1117.29	157.06	135.556	189.656	135.054	112.843	23228	32.539				Q4/1966	#N/A	#N/A	#N/A	#N/A	#N/A	#N/A	Q4/1966	#N/A	#N/A	#N/A		189.656	4.4608	#N/A
Q1/1967	1967-03-31	1168.62	162.08	137.673	192.13	135.969	113.034	23358	32.774				Q1/1967	#N/A	#N/A	#N/A	#N/A	#N/A	#N/A	Q1/1967	#N/A	#N/A	#N/A		192.13	5.3208	#N/A
Q2/1967	1967-06-30	1173.17	163.104	139.328	193.825	137.796	117.928	23583	32.974				Q2/1967	#N/A	#N/A	#N/A	#N/A	#N/A	#N/A	Q2/1967	#N/A	#N/A	#N/A		193.825	3.575	#N/A
Q3/1967	1967-09-30	1183.62	163.008	140.857	194.74	139.695	118.909	23851	33.139				Q3/1967	#N/A	#N/A	#N/A	#N/A	#N/A	#N/A	Q3/1967	#N/A	#N/A	#N/A		194.74	1.9023	#N/A
Q4/1967	1967-12-31	1196.13	166.832	142.008	194.761	141.529	119.857	24030	33.258				Q4/1967	#N/A	#N/A	#N/A	#N/A	#N/A	#N/A	Q4/1967	#N/A	#N/A	#N/A		194.761	0.043	#N/A
Q1/1968	1968-03-31	1228.37	167.02	143.075	192.435	144.182	120.818	24307	33.332				Q1/1968	#N/A	#N/A	#N/A	#N/A	#N/A	#N/A	Q1/1968	#N/A	#N/A	#N/A		192.435	-4.6935	#N/A
Q2/1968	1968-06-30	1231.49	165.764	143.854	191.844	145.514	123.599	24692	33.493				Q2/1968	#N/A	#N/A	#N/A	#N/A	#N/A	#N/A	Q2/1968	#N/A	#N/A	#N/A		191.844	-1.2209	#N/A
Q3/1968	1968-09-30	1237.05	166.568	147.607	196.182	146.587	126.612	25074	33.742				Q3/1968	#N/A	#N/A	#N/A	#N/A	#N/A	#N/A	Q3/1968	#N/A	#N/A	#N/A		196.182	9.3556	#N/A
Q4/1968	1968-12-31	1246.54	165.228	149.662	199.641	147.478	128.806	25178	34.063				Q4/1968	#N/A	#N/A	#N/A	#N/A	#N/A	#N/A	Q4/1968	#N/A	#N/A	#N/A		199.641	7.2404	#N/A
Q1/1969	1969-03-31	1240.08	165.036	151.575	201.639	148.783	128.097	25490	34.455				Q1/1969	#N/A	#N/A	#N/A	#N/A	#N/A	#N/A	Q1/1969	#N/A	#N/A	#N/A		201.639	4.0649	#N/A
Q2/1969	1969-06-30	1255.09	162.488	154.062	202.46	149.55	131.274	25635	34.882				Q2/1969	#N/A	#N/A	#N/A	#N/A	#N/A	#N/A	Q2/1969	#N/A	#N/A	#N/A		202.46	1.6388	#N/A
Q3/1969	1969-09-30	1258.48	162.316	156.019	204.427	150.385	131.11	25887	35.342				Q3/1969	#N/A	#N/A	#N/A	#N/A	#N/A	#N/A	Q3/1969	#N/A	#N/A	#N/A		204.427	3.943	#N/A
Q4/1969	1969-12-31	1261	163.764	157.88	205.5	151.383	133.482	26265	35.863				Q4/1969	#N/A	#N/A	#N/A	#N/A	#N/A	#N/A	Q4/1969	#N/A	#N/A	#N/A		205.5	2.1154	#N/A
Q1/1970	1970-03-31	1244.64	162.428	159.589	202.392	149.306	138.424	26570	36.997				Q1/1970	50.84	#N/A	#N/A	100	#N/A	#N/A	Q1/1970	#N/A	#N/A	#N/A		202.392	-5.9139	#N/A
Q2/1970	1970-06-30	1232.39	167.76	161.902	209.345	152.848	143.304	26680	37.018				Q2/1970	52.59	#N/A	#N/A	103.442	#N/A	#N/A	Q2/1970	#N/A	#N/A	#N/A		209.345	14.4654	#N/A
Q3/1970	1970-09-30	1234.67	166.644	164.118	213.349	155.716	140.333	27243	37.142				Q3/1970	53.59	#N/A	#N/A	105.409	#N/A	#N/A	Q3/1970	#N/A	#N/A	#N/A		213.349	7.8732	#N/A
Q4/1970	1970-12-31	1236.27	168	166.811	223.942	157.647	143.4	27752	37.473				Q4/1970	56.24	#N/A	#N/A	110.622	#N/A	#N/A	Q4/1970	#N/A	#N/A	#N/A		223.942	21.3888	#N/A
Q1/1971	1971-03-31	1235.97	168.98	169.939	218.545	158.879	140.776	27936	37.777				Q1/1971	54.9	#N/A	#N/A	107.986	#N/A	#N/A	Q1/1971	#N/A	#N/A	#N/A		218.545	-9.2958	#N/A
Q2/1971	1971-06-30	1234.89	172.144	172.347	225.498	160.648	145.547	28127	38.522				Q2/1971	56.65	#N/A	#N/A	111.428	#N/A	#N/A	Q2/1971	#N/A	#N/A	#N/A		225.498	13.345	#N/A
Q3/1971	1971-09-30	1233.03	173.724	174.615	228.155	162.626	148.417	28555	39.08				Q3/1971	57.33	#N/A	#N/A	112.766	#N/A	#N/A	Q3/1971	#N/A	#N/A	#N/A		228.155	4.7975	#N/A
Q4/1971	1971-12-31	1232.23	173.364	176.684	231.03	164.863	149.991	28886	39.653				Q4/1971	58.04	#N/A	#N/A	114.162	#N/A	#N/A	Q4/1971	#N/A	#N/A	#N/A		231.03	5.1375	#N/A
Q1/1972	1972-03-31	1244.04	177.444	177.941	233.479	167.695	147.183	29336	39.784				Q1/1972	58.65	#N/A	#N/A	115.362	#N/A	#N/A	Q1/1972	#N/A	#N/A	#N/A		233.479	4.3067	#N/A
Q2/1972	1972-06-30	1251.11	179.08	180.332	234.097	169.768	149.303	29699	40.481				Q2/1972	58.81	#N/A	#N/A	115.677	#N/A	#N/A	Q2/1972	#N/A	#N/A	#N/A		234.097	1.0643	#N/A
Q3/1972	1972-09-30	1234.01	181.496	182.5	237.155	171.219	152.772	29826	41.108				Q3/1972	59.57	#N/A	#N/A	117.172	#N/A	#N/A	Q3/1972	#N/A	#N/A	#N/A		237.155	5.328	#N/A
Q4/1972	1972-12-31	1230.01	183.068	185.089	242.797	172.333	155.076	30279	41.715				Q4/1972	60.99	#N/A	#N/A	119.965	#N/A	#N/A	Q4/1972	#N/A	#N/A	#N/A		242.797	9.8614	#N/A
Q1/1973	1973-03-31	1230.31	185.016	189.253	249.022	173.647	154.817	30572	42.329				Q1/1973	62.56	#N/A	#N/A	123.053	#N/A	#N/A	Q1/1973	#N/A	#N/A	#N/A		249.022	10.656	#N/A
Q2/1973	1973-06-30	1230.87	186.392	192.278	250.696	175.355	156.692	31312	43.005				Q2/1973	62.97	#N/A	#N/A	123.859	#N/A	#N/A	Q2/1973	#N/A	#N/A	#N/A		250.696	2.7169	#N/A
Q3/1973	1973-09-30	1221.98	188.072	194.672	248.986	176.837	157.455	31556	43.667				Q3/1973	62.56	#N/A	#N/A	123.053	#N/A	#N/A	Q3/1973	#N/A	#N/A	#N/A		248.986	-2.702	#N/A
Q4/1973	1973-12-31	1227.24	188.432	196.916	257.431	178.29	163.487	32140	44.536				Q4/1973	64.66	#N/A	#N/A	127.183	#N/A	#N/A	Q4/1973	#N/A	#N/A	#N/A		257.431	14.2733	#N/A
Q1/1974	1974-03-31	1247.4	186	198.654	261.544	179.625	162.26	30478	45.847				Q1/1974	65.7	#N/A	#N/A	129.229	#N/A	#N/A	Q1/1974	#N/A	#N/A	#N/A		261.544	6.5461	#N/A
Q2/1974	1974-06-30	1244.9	189.264	201.889	265.475	180.184	166.575	31076	47.205				Q2/1974	66.67	#N/A	#N/A	131.137	#N/A	#N/A	Q2/1974	#N/A	#N/A	#N/A		265.475	6.1495	#N/A
Q3/1974	1974-09-30	1254.31	191.6	203.525	266.167	181.264	169.063	31383	48.006				Q3/1974	66.86	#N/A	#N/A	131.511	#N/A	#N/A	Q3/1974	#N/A	#N/A	#N/A		266.167	1.0462	#N/A
Q4/1974	1974-12-31	1263.98	194.32	206.742	269.043	182.511	171.258	32114	48.606				Q4/1974	67.59	#N/A	#N/A	132.946	#N/A	#N/A	Q4/1974	#N/A	#N/A	#N/A		269.043	4.3922	#N/A
Q1/1975	1975-03-31	1272.07	202.096	209.332	270.235	183.596	172.628	34185	49.178				Q1/1975	67.88	#N/A	#N/A	133.517	#N/A	#N/A	Q1/1975	#N/A	#N/A	#N/A		270.235	1.7846	#N/A
Q2/1975	1975-06-30	1283.06	199.372	212.791	276.532	185.133	178.374	34961	49.668				Q2/1975	69.46	#N/A	#N/A	136.625	#N/A	#N/A	Q2/1975	#N/A	#N/A	#N/A		276.532	9.652	#N/A
Q3/1975	1975-09-30	1286.61	199.952	215.313	282.102	186.824	180.439	35611	49.944				Q3/1975	70.88	#N/A	#N/A	139.418	#N/A	#N/A	Q3/1975	#N/A	#N/A	#N/A		282.102	8.3024	#N/A
Q4/1975	1975-12-31	1286	204.016	218.631	280.828	188.506	180.283	36040	50.744				Q4/1975	70.55	#N/A	#N/A	138.769	#N/A	#N/A	Q4/1975	#N/A	#N/A	#N/A		280.828	-1.7942	#N/A
Q1/1976	1976-03-31	1281.82	204.08	220.677	280.591	189.809	179.11	36059	51.889				Q1/1976	70.47	#N/A	#N/A	138.611	#N/A	#N/A	Q1/1976	#N/A	#N/A	#N/A		280.591	-0.3366	#N/A
Q2/1976	1976-06-30	1286.46	205.796	222.112	282.811	190.586	181.087	36506	53.027				Q2/1976	71.03	#N/A	#N/A	139.713	#N/A	#N/A	Q2/1976	#N/A	#N/A	#N/A		282.811	3.2033	#N/A
Q3/1976	1976-09-30	1282.38	204.94	223.728	284.377	192.012	180.098	36928	53.903				Q3/1976	71.44	#N/A	#N/A	140.519	#N/A	#N/A	Q3/1976	#N/A	#N/A	#N/A		284.377	2.2324	#N/A
Q4/1976	1976-12-31	1288.75	203.224	224.376	285.505	193.824	182.048	37257	54.482				Q4/1976	71.72	#N/A	#N/A	141.07	#N/A	#N/A	Q4/1976	#N/A	#N/A	#N/A		285.505	1.5968	#N/A
Q1/1977	1977-03-31	1296.19	201.188	225.636	286.734	195.629	184.999	37666	54.772				Q1/1977	72.03	#N/A	#N/A	141.68	#N/A	#N/A	Q1/1977	#N/A	#N/A	#N/A		286.734	1.7323	#N/A
Q2/1977	1977-06-30	1306.83	202.644	227.872	285.46	197.986	188.585	37856	55.117				Q2/1977	71.72	#N/A	#N/A	141.07	#N/A	#N/A	Q2/1977	#N/A	#N/A	#N/A		285.46	-1.7656	#N/A
Q3/1977	1977-09-30	1317.22	202.2	230.868	289.609	200.476	187.29	38350	55.434				Q3/1977	72.75	#N/A	#N/A	143.096	#N/A	#N/A	Q3/1977	#N/A	#N/A	#N/A		289.609	5.9429	#N/A
Q4/1977	1977-12-31	1319.66	201.752	234.309	295.397	202.653	188.741	39005	56.296				Q4/1977	74.21	#N/A	#N/A	145.968	#N/A	#N/A	Q4/1977	#N/A	#N/A	#N/A		295.397	8.2368	#N/A
Q1/1978	1978-03-31	1326.27	203.932	239.492	297.026	204.201	188.101	39414	57.42				Q1/1978	74.6	#N/A	#N/A	146.735	#N/A	#N/A	Q1/1978	#N/A	#N/A	#N/A		297.026	2.2243	#N/A
Q2/1978	1978-06-30	1334.63	204.256	243.195	298.337	206.011	189.416	39904	58.09				Q2/1978	74.94	#N/A	#N/A	147.404	#N/A	#N/A	Q2/1978	#N/A	#N/A	#N/A		298.337	1.7764	#N/A
Q3/1978	1978-09-30	1339.18	206.196	246.218	303.032	207.77	189.812	40475	58.669				Q3/1978	76.12	#N/A	#N/A	149.725	#N/A	#N/A	Q3/1978	#N/A	#N/A	#N/A		303.032	6.446	#N/A
Q4/1978	1978-12-31	1345.64	207.192	248.924	307	209.516	189.75	41048	59.4				Q4/1978	77.12	#N/A	#N/A	151.692	#N/A	#N/A	Q4/1978	#N/A	#N/A	#N/A		307	5.341	#N/A
Q1/1979	1979-03-31	1353.31	206.232	250.065	309.403	210.504	189.225	41608	59.966				Q1/1979	77.71	#N/A	#N/A	152.852	#N/A	#N/A	Q1/1979	#N/A	#N/A	#N/A		309.403	3.1676	#N/A
Q2/1979	1979-06-30	1356	210.396	251.407	312.824	211.518	191.87	41912	60.49				Q2/1979	78.59	#N/A	#N/A	154.583	#N/A	#N/A	Q2/1979	#N/A	#N/A	#N/A		312.824	4.4974	#N/A
Q3/1979	1979-09-30	1338.56	208.268	253.529	314.426	212.682	190.521	42113	61.083				Q3/1979	79	#N/A	#N/A	155.389	#N/A	#N/A	Q3/1979	#N/A	#N/A	#N/A		314.426	2.0637	#N/A
Q4/1979	1979-12-31	1350.27	209.356	255.747	316.537	213.459	191.768	41967	61.855				Q4/1979	79.51	#N/A	#N/A	156.393	#N/A	#N/A	Q4/1979	#N/A	#N/A	#N/A		316.537	2.713	#N/A
Q1/1980	1980-03-31	1364.83	210.508	257.592	320.15	214.42	192.981	42583	60.909				Q1/1980	80.41	#N/A	#N/A	158.163	#N/A	#N/A	Q1/1980	#N/A	#N/A	#N/A		320.15	4.6443	#N/A
Q2/1980	1980-06-30	1384.03	208.668	259.692	325.902	215.976	195.49	42889	63.293				Q2/1980	81.87	#N/A	#N/A	161.035	#N/A	#N/A	Q2/1980	#N/A	#N/A	#N/A		325.902	7.3818	#N/A
Q3/1980	1980-09-30	1374.15	211.988	261.796	325.938	218.222	198.073	43374	64.44				Q3/1980	81.87	#N/A	#N/A	161.035	#N/A	#N/A	Q3/1980	#N/A	#N/A	#N/A		325.938	0.0447	#N/A
Q4/1980	1980-12-31	1369.75	212.728	263.096	324.737	220.161	197.173	43969	64.974				Q4/1980	81.57	#N/A	#N/A	160.445	#N/A	#N/A	Q4/1980	#N/A	#N/A	#N/A		324.737	-1.466	#N/A
Q1/1981	1981-03-31	1382.12	210.244	264.728	346.951	221.341	198.366	44473	65.823				Q1/1981	87.16	#N/A	#N/A	171.44	#N/A	#N/A	Q1/1981	#N/A	#N/A	#N/A		346.951	30.3006	#N/A
Q2/1981	1981-06-30	1397.9	212.112	266.94	335.011	223.604	197.981	45407	64.938				Q2/1981	84.15	#N/A	#N/A	165.519	#N/A	#N/A	Q2/1981	#N/A	#N/A	#N/A		335.011	-13.0712	#N/A
Q3/1981	1981-09-30	1400.2	212.416	269.4	337.523	225.622	200.395	45901	65.921				Q3/1981	84.78	#N/A	#N/A	166.758	#N/A	#N/A	Q3/1981	#N/A	#N/A	#N/A		337.523	3.0329	#N/A
Q4/1981	1981-12-31	1409.75	208.336	270.936	336.686	227.32	200.943	46541	67.249				Q4/1981	84.58	#N/A	#N/A	166.365	#N/A	#N/A	Q4/1981	#N/A	#N/A	#N/A		336.686	-0.9885	#N/A
Q1/1982	1982-03-31	1418.68	211.32	275.236	340.999	228.258	199.248	47038	68.511				Q1/1982	85.67	#N/A	#N/A	168.509	#N/A	#N/A	Q1/1982	#N/A	#N/A	#N/A		340.999	5.2239	#N/A
Q2/1982	1982-06-30	1418	211.668	277.516	335.976	230.091	201.288	47331	68.748				Q2/1982	84.41	#N/A	#N/A	166.031	#N/A	#N/A	Q2/1982	#N/A	#N/A	#N/A		335.976	-5.7635	#N/A
Q3/1982	1982-09-30	1434.02	212	282.132	333.5	231.619	203.003	47823	69.44				Q3/1982	83.78	#N/A	#N/A	164.792	#N/A	#N/A	Q3/1982	#N/A	#N/A	#N/A		333.5	-2.9145	#N/A
Q4/1982	1982-12-31	1451.47	213.384	284.008	331.608	234.328	203.577	48299	69.84				Q4/1982	83.3	#N/A	#N/A	163.847	#N/A	#N/A	Q4/1982	#N/A	#N/A	#N/A		331.608	-2.251	#N/A
Q1/1983	1983-03-31	1464.07	212.736	285.564	334.529	236.861	200.052	49278	70.659				Q1/1983	84.04	#N/A	#N/A	165.303	#N/A	#N/A	Q1/1983	#N/A	#N/A	#N/A		334.529	3.5704	#N/A
Q2/1983	1983-06-30	1474.46	216.496	285.596	333.473	239.256	203.77	50165	71.151				Q2/1983	83.77	#N/A	#N/A	164.772	#N/A	#N/A	Q2/1983	#N/A	#N/A	#N/A		333.473	-1.2563	#N/A
Q3/1983	1983-09-30	1491.56	215.424	287.492	332.381	240.935	205.911	50762	71.703				Q3/1983	83.51	#N/A	#N/A	164.26	#N/A	#N/A	Q3/1983	#N/A	#N/A	#N/A		332.381	-1.3035	#N/A
Q4/1983	1983-12-31	1456.04	216.996	289.064	335.402	241.168	206.14	51100	72.007				Q4/1983	84.25	#N/A	#N/A	165.716	#N/A	#N/A	Q4/1983	#N/A	#N/A	#N/A		335.402	3.6859	#N/A
Q1/1984	1984-03-31	1462.65	218.536	289.324	336.13	240.896	206.65	51535	72.419				Q1/1984	84.43	#N/A	#N/A	166.07	#N/A	#N/A	Q1/1984	#N/A	#N/A	#N/A		336.13	0.8711	#N/A
Q2/1984	1984-06-30	1492.48	216.452	291.444	338.023	242.086	206.728	52228	72.316				Q2/1984	84.9	#N/A	#N/A	166.994	#N/A	#N/A	Q2/1984	#N/A	#N/A	#N/A		338.023	2.2717	#N/A
Q3/1984	1984-09-30	1501.83	218.044	295.072	336.931	244.72	209.129	52319	73.099				Q3/1984	84.64	#N/A	#N/A	166.483	#N/A	#N/A	Q3/1984	#N/A	#N/A	#N/A		336.931	-1.286	#N/A
Q4/1984	1984-12-31	1521.71	218.852	296.628	340.935	245.766	211.794	52032	73.002				Q4/1984	85.66	#N/A	#N/A	168.489	#N/A	#N/A	Q4/1984	#N/A	#N/A	#N/A		340.935	4.8391	#N/A
Q1/1985	1985-03-31	1540.63	221.248	298.74	338.688	249.011	214.999	52154	74.458				Q1/1985	85.08	#N/A	#N/A	167.349	#N/A	#N/A	Q1/1985	#N/A	#N/A	#N/A		338.688	-2.6113	#N/A
Q2/1985	1985-06-30	1561.83	213.968	301.292	339.161	251.599	216.846	52490	74.161				Q2/1985	85.2	#N/A	#N/A	167.585	#N/A	#N/A	Q2/1985	#N/A	#N/A	#N/A		339.161	0.5601	#N/A
Q3/1985	1985-09-30	1596.86	216.808	302.3	341.563	249.066	215.164	53008	76.867				Q3/1985	85.8	#N/A	#N/A	168.765	#N/A	#N/A	Q3/1985	#N/A	#N/A	#N/A		341.563	2.8637	#N/A
Q4/1985	1985-12-31	1611.9	217.208	304.744	343.529	251.482	220.498	53470	77.959				Q4/1985	86.3	#N/A	#N/A	169.748	#N/A	#N/A	Q4/1985	#N/A	#N/A	#N/A		343.529	2.322	#N/A
Q1/1986	1986-03-31	1627.56	222.576	306.188	341.218	252.933	220.616	53479	78.985				Q1/1986	85.73	#N/A	#N/A	168.627	#N/A	#N/A	Q1/1986	#N/A	#N/A	#N/A		341.218	-2.6644	#N/A
Q2/1986	1986-06-30	1659.63	221.168	308.276	345.95	254.329	219.172	53147	78.972				Q2/1986	86.91	#N/A	#N/A	170.948	#N/A	#N/A	Q2/1986	#N/A	#N/A	#N/A		345.95	5.6637	#N/A
Q3/1986	1986-09-30	1683.65	219.292	310.388	348.134	257.635	221.35	54632	78.863				Q3/1986	87.46	#N/A	#N/A	172.03	#N/A	#N/A	Q3/1986	#N/A	#N/A	#N/A		348.134	2.5493	#N/A
Q4/1986	1986-12-31	1682.59	219.348	312.98	347.296	260.893	220.519	57053	80.726				Q4/1986	87.25	#N/A	#N/A	171.617	#N/A	#N/A	Q4/1986	#N/A	#N/A	#N/A		347.296	-0.9585	#N/A
Q1/1987	1987-03-31	1683.61	219.008	314.032	346.878	262.715	222.369	55781	82.941				Q1/1987	87.12	#N/A	#N/A	171.361	#N/A	#N/A	Q1/1987	#N/A	#N/A	#N/A		346.878	-0.4813	#N/A
Q2/1987	1987-06-30	1687.74	222.472	316.04	346.842	266.481	224.07	56775	86.618				Q2/1987	87.12	#N/A	#N/A	171.361	#N/A	#N/A	Q2/1987	#N/A	#N/A	#N/A		346.842	-0.0419	#N/A
Q3/1987	1987-09-30	1683.35	221.7	318.784	347.315	270.671	222.519	57164	88.007				Q3/1987	87.25	#N/A	#N/A	171.617	#N/A	#N/A	Q3/1987	#N/A	#N/A	#N/A		347.315	0.5468	#N/A
Q4/1987	1987-12-31	1714.83	221.036	322.828	350.081	274.609	225.305	57143	89.093				Q4/1987	87.95	#N/A	#N/A	172.994	#N/A	#N/A	Q4/1987	#N/A	#N/A	#N/A		350.081	3.2247	#N/A
Q1/1988	1988-03-31	1715.89	221.828	326.344	351.046	276.974	227.971	58245	89.039				Q1/1988	88.18	#N/A	#N/A	173.446	#N/A	#N/A	Q1/1988	#N/A	#N/A	#N/A		351.046	1.1066	#N/A
Q2/1988	1988-06-30	1712.22	221.548	328.272	350.609	279.275	230.085	58768	88.651				Q2/1988	88.07	#N/A	#N/A	173.23	#N/A	#N/A	Q2/1988	#N/A	#N/A	#N/A		350.609	-0.4968	#N/A
Q3/1988	1988-09-30	1711.06	219.688	330.26	352.648	280.148	231.126	59251	89.591				Q3/1988	88.58	#N/A	#N/A	174.233	#N/A	#N/A	Q3/1988	#N/A	#N/A	#N/A		352.648	2.346	#N/A
Q4/1988	1988-12-31	1745.68	222.816	329.596	357.161	280.352	231.196	59546	92.012				Q4/1988	89.71	#N/A	#N/A	176.456	#N/A	#N/A	Q4/1988	#N/A	#N/A	#N/A		357.161	5.2189	#N/A
Q1/1989	1989-03-31	1732.75	221.172	331.58	343.656	279.602	232.066	60070	95.016				Q1/1989	86.33	#N/A	#N/A	169.807	#N/A	#N/A	Q1/1989	#N/A	#N/A	#N/A		343.656	-14.2883	#N/A
Q2/1989	1989-06-30	1760.07	222.232	331.928	347.333	279.952	235.266	60482	96.824				Q2/1989	87.25	#N/A	#N/A	171.617	#N/A	#N/A	Q2/1989	#N/A	#N/A	#N/A		347.333	4.3485	#N/A
Q3/1989	1989-09-30	1768.94	225.7	333.772	346.277	280.484	238.015	60796	98.772				Q3/1989	86.99	#N/A	#N/A	171.105	#N/A	#N/A	Q3/1989	#N/A	#N/A	#N/A		346.277	-1.2102	#N/A
Q4/1989	1989-12-31	1780.25	224.668	336.608	344.166	282.484	237.681	61318	98.614				Q4/1989	86.46	#N/A	#N/A	170.063	#N/A	#N/A	Q4/1989	#N/A	#N/A	#N/A		344.166	-2.4165	#N/A
Q1/1990	1990-03-31	1797.77	226.68	340.588	349.845	284.292	242.31	61666	99.384				Q1/1990	87.89	#N/A	#N/A	172.876	#N/A	#N/A	Q1/1990	#N/A	#N/A	#N/A		349.845	6.765	#N/A
Q2/1990	1990-06-30	1801.87	227.604	341.688	353.521	286.609	239.438	62601	102.934				Q2/1990	88.8	#N/A	#N/A	174.666	#N/A	#N/A	Q2/1990	#N/A	#N/A	#N/A		353.521	4.2703	#N/A
Q3/1990	1990-09-30	1801.73	229.472	345.852	352.138	288.083	244.725	62772	104.542				Q3/1990	88.47	#N/A	#N/A	174.017	#N/A	#N/A	Q3/1990	#N/A	#N/A	#N/A		352.138	-1.556	#N/A
Q4/1990	1990-12-31	1816.28	231.52	347.972	353.849	289.881	247.452	63662	106.769				Q4/1990	88.89	#N/A	#N/A	174.843	#N/A	#N/A	Q4/1990	#N/A	#N/A	#N/A		353.849	1.9576	#N/A
Q1/1991	1991-03-31	1834.79	232.036	351.024	353.907	290.502	246.173	64524	105.604				Q1/1991	88.48	353.907	353.907	174.036	#N/A	#N/A	Q1/1991	#N/A	#N/A	#N/A		353.907	0.0659	#N/A
Q2/1991	1991-06-30	1835.07	238.216	355.604	358.84	291.889	250.796	64734	107.521				Q2/1991	89.71	358.84	358.84	176.456	#N/A	5.69314	Q2/1991	5.6934	5.69314	0.00026469		358.84	6.9166	-1.2232
Q3/1991	1991-09-30	1824.62	236.368	357.392	368.608	294.309	248.979	65481	111.071				Q3/1991	92.16	368.608	368.608	181.275	#N/A	11.3411	Q3/1991	11.3408	11.3411	-0.000332494		368.608	9.6661	1.6747
Q4/1991	1991-12-31	1816	235.956	360.212	370.137	294.002	250.921	66137	114.396				Q4/1991	92.54	370.137	370.137	182.022	#N/A	1.66957	Q4/1991	1.6699	1.66957	0.00033248		370.137	6.2881	-4.6182
Q1/1992	1992-03-31	1822.36	236.832	362.44	377.76	295.66	251.321	66277	115.956				Q1/1992	94.44	377.76	377.76	185.759	#N/A	8.49604	Q1/1992	8.495	8.49604	-0.00103731		377.76	3.6061	4.8889
Q2/1992	1992-06-30	1826.17	237.924	364.876	381.361	296.625	249.919	66377	114.311				Q2/1992	95.34	381.361	381.361	187.53	#N/A	3.86787	Q2/1992	3.8684	3.86787	0.000528508		381.361	5.0611	-1.1927
Q3/1992	1992-09-30	1844.25	237.868	369.328	386.048	295.35	249.861	67173	112.357				Q3/1992	96.51	386.048	386.048	189.831	#N/A	5.00745	Q3/1992	5.0073	5.00745	-0.000151037		386.048	3.8027	1.2046
Q4/1992	1992-12-31	1850.33	238.956	372.752	385.111	294.238	253.877	68024	111.296				Q4/1992	96.27	385.111	385.111	189.359	#N/A	-0.967335	Q4/1992	-0.9677	-0.967335	-0.000365219		385.111	2.9207	-3.8884
Q1/1993	1993-03-31	1834.51	236.776	376.796	387.022	292.412	251.445	68350	113.893				Q1/1993	96.76	387.022	387.022	190.323	#N/A	1.99971	Q1/1993	2.0003	1.99971	0.000594693		387.022	-1.9436	3.9439
Q2/1993	1993-06-30	1826.88	234.644	381.008	385.493	290.913	252.521	68806	115.622				Q2/1993	96.37	385.493	385.493	189.555	#N/A	-1.57093	Q2/1993	-1.5713	-1.57093	-0.00036816		385.493	-1.5919	0.0206
Q3/1993	1993-09-30	1827.44	237.344	381.588	384.605	290.482	249.602	69515	118.662				Q3/1993	96.15	384.605	384.605	189.123	#N/A	-0.918239	Q3/1993	-0.9183	-0.918239	-6.13923e-05		384.605	-1.6437	0.7254
Q4/1993	1993-12-31	1832.24	237.14	382.452	380.707	289.795	249.396	69740	117.806				Q4/1993	95.18	380.707	380.707	187.215	#N/A	-3.99281	Q4/1993	-3.9921	-3.99281	0.000713002		380.707	-2.0143	-1.9778
Q1/1994	1994-03-31	1826.88	236.804	381.776	394.089	288.685	245.764	70560	117.479				Q1/1994	98.52	394.089	394.089	193.784	#N/A	14.819	Q1/1994	14.8186	14.819	-0.000411186		394.089	11.6891	3.1295
Q2/1994	1994-06-30	1828.85	240.36	381.628	396.112	287.659	248.876	71516	116.429				Q2/1994	99.02	396.112	396.112	194.768	#N/A	2.06921	Q2/1994	2.0689	2.06921	-0.000308278		396.112	2.2283	-0.1594
Q3/1994	1994-09-30	1849.34	240.148	381.608	396.26	284.641	249.112	71993	116.684				Q3/1994	99.06	396.26	396.26	194.847	#N/A	0.149536	Q3/1994	0.1496	0.149536	6.35387e-05		396.26	-0.5371	0.6867
Q4/1994	1994-12-31	1836.91	239.312	381.684	399.516	282.37	247.821	72133	117.891				Q4/1994	99.88	399.516	399.516	196.459	#N/A	3.32746	Q4/1994	3.3276	3.32746	0.000136951		399.516	6.2966	-2.969
Q1/1995	1995-03-31	1840.72	241.804	380.348	394.669	279.347	247.536	73607	119.96				Q1/1995	98.67	394.669	394.669	194.079	#N/A	-4.76527	Q1/1995	-4.7654	-4.76527	-0.000129772		394.669	-7.9982	3.2328
Q2/1995	1995-06-30	1845.24	242.716	380.504	402.759	276.885	246.807	73933	119.808				Q2/1995	100.69	402.759	402.759	198.053	#N/A	8.45484	Q2/1995	8.4556	8.45484	0.000755893		402.759	9.5374	-1.0818
Q3/1995	1995-09-30	1848.21	242.108	382.072	409.272	275.299	244.809	74784	119.832				Q3/1995	102.32	409.272	409.272	201.259	#N/A	6.62698	Q3/1995	6.626	6.62698	-0.000982624		409.272	6.7424	-0.1164
Q4/1995	1995-12-31	1822.92	243.148	383.868	413.958	275.433	242.581	74920	120.296				Q4/1995	103.49	413.958	413.958	203.56	#N/A	4.6591	Q4/1995	4.6598	4.6591	0.00070259		413.958	8.0047	-3.3449
Q1/1996	1996-03-31	1829.7	244.472	386.892	408.494	279.153	242.753	75511	120.38				Q1/1996	102.12	408.494	408.494	200.865	#N/A	-5.17614	Q1/1996	-5.176	-5.17614	0.000144907		408.494	-8.7714	3.5954
Q2/1996	1996-06-30	1851.74	242.776	389.56	413.971	277.584	242.73	75561	120.88				Q2/1996	103.49	413.971	413.971	203.56	#N/A	5.47194	Q2/1996	5.4711	5.47194	-0.00084285		413.971	6.1078	-0.6367
Q3/1996	1996-09-30	1843.4	244.236	391.648	418.608	279.684	239.024	75938	121.864				Q3/1996	104.65	418.608	418.608	205.842	#N/A	4.55635	Q3/1996	4.5569	4.55635	0.000548136		418.608	5.8815	-1.3246
Q4/1996	1996-12-31	1859.51	244.872	393.672	418.213	278.991	238.491	77035	122.616				Q4/1996	104.55	418.213	418.213	205.645	#N/A	-0.376908	Q4/1996	-0.3766	-0.376908	0.000307528		418.213	0.3392	-0.7158
Q1/1997	1997-03-31	1859.79	242.992	394.032	418.102	278.178	240.43	76963	123.3				Q1/1997	104.53	418.102	418.102	205.606	#N/A	-0.106124	Q1/1997	-0.1062	-0.106124	-7.62628e-05		418.102	-2.6909	2.5847
Q2/1997	1997-06-30	1880.84	240.276	394.532	421.21	281.556	238.637	77098	124.704				Q2/1997	105.3	421.21	421.21	207.12	#N/A	3.00676	Q2/1997	3.0068	3.00676	4.33029e-05		421.21	3.3207	-0.3139
Q3/1997	1997-09-30	1882.96	241.652	394.904	419.928	281.436	239.126	76980	125.228				Q3/1997	104.98	419.928	419.928	206.491	#N/A	-1.2119	Q3/1997	-1.2125	-1.2119	-0.000601897		419.928	-0.9683	-0.2442
Q4/1997	1997-12-31	1892.01	248.148	394.436	414.156	279.941	239.078	77410	125.52				Q4/1997	103.54	414.156	414.156	203.659	#N/A	-5.38576	Q4/1997	-5.3858	-5.38576	-3.79612e-05		414.156	-5.637	0.2512
Q1/1998	1998-03-31	1882.26	248.96	392.192	424.873	281.623	245.509	77259	126.804				Q1/1998	106.22	424.873	424.873	208.93	#N/A	10.7594	Q1/1998	10.7601	10.7594	0.000672311		424.873	11.2656	-0.5055
Q2/1998	1998-06-30	1908.82	251.188	391.052	428.031	282.755	242.991	77913	127.856				Q2/1998	107	428.031	428.031	210.464	#N/A	3.00644	Q2/1998	3.0058	3.00644	-0.000636287		428.031	2.833	0.1728
Q3/1998	1998-09-30	1909.24	252.124	390.976	427.537	283.574	243.915	78281	129.612				Q3/1998	106.88	427.537	427.537	210.228	#N/A	-0.46085	Q3/1998	-0.4602	-0.46085	0.000650222		427.537	-0.5391	0.0789
Q4/1998	1998-12-31	1935.38	254.352	392.976	427.439	284.346	243.262	78767	131.376				Q4/1998	106.86	427.439	427.439	210.189	#N/A	-0.0916565	Q4/1998	-0.0923	-0.0916565	-0.000643549		427.439	0.2916	-0.3839
Q1/1999	1999-03-31	1947.5	251.004	395.464	433.112	285.046	245.966	79709	132.724				Q1/1999	108.27	433.112	433.112	212.962	#N/A	5.41545	Q1/1999	5.4158	5.41545	0.000345373		433.112	4.2016	1.2142
Q2/1999	1999-06-30	1952.7	262.108	396.22	430.744	286.671	247.548	80407	133.86				Q2/1999	107.68	430.744	430.744	211.802	#N/A	-2.16909	Q2/1999	-2.1692	-2.16909	-0.000107058		430.744	-2.4464	0.2772
Q3/1999	1999-09-30	1974.14	263.82	398.34	432.964	285.849	251.477	81296	133.784				Q3/1999	108.24	432.964	432.964	212.903	#N/A	2.07754	Q3/1999	2.0776	2.07754	5.84044e-05		432.964	2.0445	0.0331
Q4/1999	1999-12-31	1998.28	265.404	400.712	430.744	291.336	251.805	81648	135.24				Q4/1999	107.68	430.744	430.744	211.802	#N/A	-2.03526	Q4/1999	-2.0354	-2.03526	-0.000141741		430.744	-1.4342	-0.6012
Q1/2000	2000-03-31	1974.16	261.76	402.912	438.822	291.805	254.658	82747	137.3				Q1/2000	109.71	438.822	438.822	215.795	#N/A	7.71511	Q1/2000	7.7156	7.71511	0.000491551		438.822	7.5545	0.1611
Q2/2000	2000-06-30	2011.6	271.112	404.72	436.8	292.765	257.471	83711	138.636				Q2/2000	109.2	436.8	436.8	214.792	#N/A	-1.83042	Q2/2000	-1.831	-1.83042	-0.000583611		436.8	-1.6142	-0.2168
Q3/2000	2000-09-30	2001.65	271.552	406.612	436.06	298.588	258.674	84336	141.256				Q3/2000	109.01	436.06	436.06	214.418	#N/A	-0.675936	Q3/2000	-0.676	-0.675936	-6.44428e-05		436.06	-0.7723	0.0963
Q4/2000	2000-12-31	2006.32	271.852	406.928	439.513	301.399	260.251	84804	141.86				Q4/2000	109.88	439.513	439.513	216.129	#N/A	3.20528	Q4/2000	3.2056	3.20528	0.000324104		439.513	2.8483	0.3573
Q1/2001	2001-03-31	2037.34	278.584	407.896	439.895	304.76	263.582	85056	142.828				Q1/2001	109.98	439.895	439.895	216.326	#N/A	0.348111	Q1/2001	0.3484	0.348111	0.00028897		439.895	0.977	-0.6286
Q2/2001	2001-06-30	2062.06	273.976	408.892	438.613	306.008	266.894	86642	144.4				Q2/2001	109.66	438.613	438.613	215.696	#N/A	-1.16065	Q2/2001	-1.1612	-1.16065	-0.000553373		438.613	-1.7684	0.6072
Q3/2001	2001-09-30	2080.85	280.632	410.24	438.07	308.155	267.661	87069	145.448				Q3/2001	109.52	438.07	438.07	215.421	#N/A	-0.494279	Q3/2001	-0.494	-0.494279	0.000278543		438.07	-1.3345	0.8405
Q4/2001	2001-12-31	2096.31	286.9	411.452	443.595	315.745	268.023	88273	147.652				Q4/2001	110.9	443.595	443.595	218.135	#N/A	5.1411	Q4/2001	5.1413	5.1411	0.00019952		443.595	6.3012	-1.1599
Q1/2002	2002-03-31	2124.05	284.904	413.244	441.548	310.49	269.886	88490	148.232				Q1/2002	110.38	441.548	441.548	217.113	#N/A	-1.83309	Q1/2002	-1.8334	-1.83309	-0.000309453		441.548	-1.5967	-0.2367
Q2/2002	2002-06-30	2145.07	291.384	415.636	443.817	314.513	270.993	88870	149.348				Q2/2002	110.95	443.817	443.817	218.234	#N/A	2.07139	Q2/2002	2.0717	2.07139	0.000306002		443.817	2.2363	-0.1646
Q3/2002	2002-09-30	2156.51	294.692	418.168	446.037	312.471	273.666	89542	151.652				Q3/2002	111.51	446.037	446.037	219.335	#N/A	2.01589	Q3/2002	2.016	2.01589	0.000112839		446.037	0.9659	1.0501
Q4/2002	2002-12-31	2171.04	296	420.9	449.935	311.575	275.738	89346	153.696				Q4/2002	112.48	449.935	449.935	221.243	#N/A	3.54177	Q4/2002	3.5413	3.54177	-0.000465701		449.935	3.444	0.0973
Q1/2003	2003-03-31	2161.85	297.244	421.356	444.582	314.173	278.766	89855	155.352				Q1/2003	111.15	444.582	444.582	218.627	#N/A	-4.67465	Q1/2003	-4.6744	-4.67465	0.000254139		444.582	-4.5609	-0.1135
Q2/2003	2003-06-30	2199.11	302.84	424.008	446.161	313.945	279.749	90628	157.612				Q2/2003	111.54	446.161	446.161	219.394	#N/A	1.42825	Q2/2003	1.4279	1.42825	-0.000346776		446.161	1.0071	0.4208
Q3/2003	2003-09-30	2186.83	305.624	425.872	449.466	320.578	280.473	90972	158.984				Q3/2003	112.37	449.466	449.466	221.027	#N/A	2.99614	Q3/2003	2.9964	2.99614	0.000257293		449.466	2.9955	0.0009
Q4/2003	2003-12-31	2203.54	309.848	429.216	450.897	317.129	282.683	91382	160.672				Q4/2003	112.73	450.897	450.897	221.735	#N/A	1.27961	Q4/2003	1.2793	1.27961	-0.000306018		450.897	0.9971	0.2822
Q1/2004	2004-03-31	2210.72	310.78	431.188	444.385	318.332	284.509	91789	164.14				Q1/2004	111.1	444.385	444.385	218.529	#N/A	-5.65298	Q1/2004	-5.6529	-5.65298	8.12925e-05		444.385	-4.4429	-1.21
Q2/2004	2004-06-30	2219.05	316.444	433.612	443.398	319.129	283.997	91527	166.692				Q2/2004	110.85	443.398	443.398	218.037	#N/A	-0.885463	Q2/2004	-0.8852	-0.885463	0.000263376		443.398	-0.6399	-0.2453
Q3/2004	2004-09-30	2231.18	318.384	435.128	446.309	320.866	286.329	91927	169.908				Q3/2004	111.58	446.309	446.309	219.473	#N/A	2.65206	Q3/2004	2.6517	2.65206	-0.00035766		446.309	2.1454	0.5063
Q4/2004	2004-12-31	2225.83	321.256	436.468	442.806	319.682	287.875	91862	171.996				Q4/2004	110.7	442.806	442.806	217.742	#N/A	-3.10276	Q4/2004	-3.1024	-3.10276	0.000359513		442.806	-3.2744	0.172
Q1/2005	2005-03-31	2234.09	319.828	437.744	442.189	323.723	286.338	92761	174.74				Q1/2005	110.54	442.189	442.189	217.427	#N/A	-0.556191	Q1/2005	-0.556	-0.556191	0.000190854		442.189	-1.7109	1.1549
Q2/2005	2005-06-30	2233.06	325.312	439.148	449.442	319.928	287.35	92393	176.928				Q2/2005	112.36	449.442	449.442	221.007	#N/A	6.72419	Q2/2005	6.7234	6.72419	-0.000792809		449.442	6.5464	0.177
Q3/2005	2005-09-30	2251.96	325.104	440.968	447.073	321.046	288.981	92225	178.256				Q3/2005	111.77	447.073	447.073	219.847	#N/A	-2.09178	Q3/2005	-2.091	-2.09178	0.000780744		447.073	0	-2.091
Q4/2005	2005-12-31	2238.75	326.696	441.168	446.777	321.495	292.193	92641	180.7				Q4/2005	111.69	446.777	446.777	219.689	#N/A	-0.264571	Q4/2005	-0.2646	-0.264571	-2.919e-05		446.777	-1.0312	0.7666
Q1/2006	2006-03-31	2257.06	328.612	444.216	449.441	319.565	293.364	92346	182.512				Q1/2006	112.36	449.441	449.441	221.007	#N/A	2.4065	Q1/2006	2.4065	2.4065	2.64542e-07		449.441	1.465	0.9415
Q2/2006	2006-06-30	2254.35	329.012	445.612	449.293	321.318	296.499	92678	184.884				Q2/2006	112.32	449.293	449.293	220.928	#N/A	-0.131654	Q2/2006	-0.1317	-0.131654	-4.5868e-05		449.293	-0.4368	0.3051
Q3/2006	2006-09-30	2264.08	330.964	445.74	451.711	319.134	297.457	92688	187.656				Q3/2006	112.92	451.711	451.711	222.109	#N/A	2.17016	Q3/2006	2.1696	2.17016	-0.000556113		451.711	2.6539	-0.4843
Q4/2006	2006-12-31	2281.01	331.104	448.66	452.253	321.337	299.321	92557	190.896				Q4/2006	113.06	452.253	452.253	222.384	#N/A	0.480817	Q4/2006	0.4814	0.480817	0.000582588		452.253	1.7519	-1.2705
Q1/2007	2007-03-31	2274.24	333.66	451.076	456.101	320.169	300.523	93052	193.332				Q1/2007	114.02	456.101	456.101	224.272	#N/A	3.44709	Q1/2007	3.447	3.44709	-8.85084e-05		456.101	2.024	1.423
Q2/2007	2007-06-30	2287.34	333.196	453.388	457.384	320.854	301.928	93731	196.3				Q2/2007	114.34	457.384	457.384	224.902	#N/A	1.12995	Q2/2007	1.1297	1.12995	-0.000245978		457.384	0.6678	0.4619
Q3/2007	2007-09-30	2306.37	334.948	455.304	455.953	319.955	306.136	93557	199.92				Q3/2007	113.99	455.953	455.953	224.213	#N/A	-1.2456	Q3/2007	-1.2454	-1.2456	0.000203977		455.953	-0.3126	-0.9328
Q4/2007	2007-12-31	2314.99	331.68	456.1	459.654	324.911	306.245	94201	202.484				Q4/2007	114.91	459.654	459.654	226.023	#N/A	3.28657	Q4/2007	3.2859	3.28657	-0.000672279		459.654	3.3698	-0.0839
Q1/2008	2008-03-31	2326.33	335.668	456.676	466.696	322.334	308.984	94329	205.88				Q1/2008	116.67	466.696	466.696	229.485	#N/A	6.27036	Q1/2008	6.2706	6.27036	0.000243056		466.696	5.6295	0.6411
Q2/2008	2008-06-30	2332.16	337.392	456.928	475.872	327.914	315.729	93202	208.788				Q2/2008	118.97	475.872	475.872	234.009	#N/A	8.09965	Q2/2008	8.0997	8.09965	4.86265e-05		475.872	4.9937	3.106
Q3/2008	2008-09-30	2366.51	342.684	459.44	471.975	322.942	315.616	93189	210.744				Q3/2008	117.99	471.975	471.975	232.081	#N/A	-3.23565	Q3/2008	-3.2359	-3.23565	-0.000247577		471.975	0.3031	-3.539
Q4/2008	2008-12-31	2390.54	343.624	462.66	476.612	325.14	320.185	93526	213.644				Q4/2008	119.15	476.612	476.612	234.363	#N/A	3.98816	Q4/2008	3.9885	3.98816	0.000336055		476.612	2.596	1.3925
Q1/2009	2009-03-31	2402.41	341.268	465.632	483.667	324.266	320.22	93784	215.56				Q1/2009	120.92	483.667	483.667	237.844	#N/A	6.05373	Q1/2009	6.0534	6.05373	-0.000327488		483.667	6.394	-0.3406
Q2/2009	2009-06-30	2444.76	342.136	469.168	486.183	325.443	322.731	95102	217.56				Q2/2009	121.55	486.183	486.183	239.083	#N/A	2.09706	Q2/2009	2.097	2.09706	-6.28476e-05		486.183	0.8535	1.2435
Q3/2009	2009-09-30	2458.38	344.172	471.712	488.995	329.491	324.446	96245	219.688				Q3/2009	122.25	488.995	488.995	240.46	#N/A	2.33368	Q3/2009	2.3337	2.33368	1.87306e-05		488.995	3.137	-0.8033
Q4/2009	2009-12-31	2462.69	346.288	474.124	489.241	323.971	327.107	96759	220.932				Q4/2009	122.31	489.241	489.241	240.578	#N/A	0.201381	Q4/2009	0.2019	0.201381	0.000519048		489.241	0.882	-0.6801
Q1/2010	2010-03-31	2449.11	343.132	474.368	494.125	327.141	330.036	95849	221.428				Q1/2010	123.53	494.125	494.125	242.978	#N/A	4.05332	Q1/2010	4.0534	4.05332	8.31244e-05		494.125	4.3548	-0.3014
Q2/2010	2010-06-30	2454.9	345.724	475.492	490.179	327.708	329.661	97416	221.728				Q2/2010	122.54	490.179	490.179	241.031	#N/A	-3.15627	Q2/2010	-3.1568	-3.15627	-0.000527398		490.179	-4.9327	1.7759
Q3/2010	2010-09-30	2449.55	345.692	476.628	494.273	328.882	330.829	97814	222				Q3/2010	123.57	494.273	494.273	243.057	#N/A	3.38291	Q3/2010	3.3835	3.38291	0.000592021		494.273	4.0144	-0.6309
Q4/2010	2010-12-31	2425.89	345.96	477.532	494.767	326.861	333.12	98217	221.792				Q4/2010	123.69	494.767	494.767	243.293	#N/A	0.400379	Q4/2010	0.3998	0.400379	-0.000578806		494.767	0.6179	-0.2181
Q1/2011	2011-03-31	2389.06	347.532	479.028	495.605	323.751	333.388	98686	222.828				Q1/2011	123.9	495.605	495.605	243.706	#N/A	0.679214	Q1/2011	0.6798	0.679214	0.000586213		495.605	-0.1087	0.7885
Q2/2011	2011-06-30	2388.53	345.336	479.928	498.023	322.16	334.65	99078	222.236				Q2/2011	124.51	498.023	498.023	244.906	#N/A	1.96588	Q2/2011	1.9654	1.96588	-0.000482785		498.023	2.9291	-0.9637
Q3/2011	2011-09-30	2375.61	344.76	481.968	497.332	319.664	336.111	99424	220.716				Q3/2011	124.33	497.332	497.332	244.552	#N/A	-0.55384	Q3/2011	-0.5536	-0.55384	0.000240445		497.332	0.2519	-0.8055
Q4/2011	2011-12-31	2366.75	345.684	483.336	500.884	321.2	336.848	99631	218.656				Q4/2011	125.22	500.884	500.884	246.302	#N/A	2.8876	Q4/2011	2.8876	2.8876	4.04897e-06		500.884	2.5393	0.3483
Q1/2012	2012-03-31	2369.1	355.396	486.196	499.194	319.107	337.083	100791	214.976				Q1/2012	124.8	499.194	499.194	245.476	#N/A	-1.3428	Q1/2012	-1.3425	-1.3428	0.000298768		499.194	1.418	-2.7605
Q2/2012	2012-06-30	2358.79	346.992	488.424	502.598	317.168	336.304	100483	211.948				Q2/2012	125.65	502.598	502.598	247.148	#N/A	2.75562	Q2/2012	2.7556	2.75562	-2.31249e-05		502.598	-1.9778	4.7334
Q3/2012	2012-09-30	2361.74	349.32	489.816	504.67	318.095	338.602	100795	209.236				Q3/2012	126.17	504.67	504.67	248.171	#N/A	1.65926	Q3/2012	1.6593	1.65926	4.29181e-05		504.67	2.4177	-0.7584
Q4/2012	2012-12-31	2346.62	349.976	491.164	506.348	314.664	338.354	101406	206.772				Q4/2012	126.59	506.348	506.348	248.997	#N/A	1.33663	Q4/2012	1.336	1.33663	-0.000625877		506.348	0.2847	1.0513
Q1/2013	2013-03-31	2322.99	348.072	493.064	508.235	316.745	335.128	101408	205.952				Q1/2013	127.06	508.235	508.235	249.921	#N/A	1.49903	Q1/2013	1.4991	1.49903	7.1967e-05		508.235	0.8285	0.6706
Q2/2013	2013-06-30	2312.22	350.64	495.86	507.791	318.052	333.515	102649	206.08				Q2/2013	126.95	507.791	507.791	249.705	#N/A	-0.348987	Q2/2013	-0.349	-0.348987	-1.3005e-05		507.791	-1.6208	1.2718
Q3/2013	2013-09-30	2296.15	351.26	497.128	511.293	315.097	335.03	102664	206.176				Q3/2013	127.82	511.293	511.293	251.416	#N/A	2.78728	Q3/2013	2.7878	2.78728	0.000515968		511.293	4.8191	-2.0313
Q4/2013	2013-12-31	2281.69	354.292	498.484	512.724	315.23	337.175	102808	206.96				Q4/2013	128.18	512.724	512.724	252.124	#N/A	1.12422	Q4/2013	1.1239	1.12422	-0.000323342		512.724	-0.0704	1.1943
Q1/2014	2014-03-31	2288.69	356.776	500.024	513.316	314.596	337.649	103019	206.448				Q1/2014	128.33	513.316	513.316	252.419	#N/A	0.462647	Q1/2014	0.4626	0.462647	-4.74201e-05		513.316	1.708	-1.2454
Q2/2014	2014-06-30	2286.8	360.672	501.632	515.585	312.622	336.919	102537	205.176				Q2/2014	128.9	515.585	515.585	253.541	#N/A	1.77987	Q2/2014	1.7802	1.77987	0.000330444		515.585	1.7415	0.0387
Q3/2014	2014-09-30	2301.18	361.904	503.536	519.631	314.422	337.254	102979	205.348				Q3/2014	129.91	519.631	519.631	255.527	#N/A	3.1761	Q3/2014	3.1756	3.1761	-0.000501321		519.631	1.7693	1.4063
Q4/2014	2014-12-31	2292.76	360.184	505.46	523.084	314.447	336.01	103216	205.324				Q4/2014	130.77	523.084	523.084	257.219	#N/A	2.68465	Q4/2014	2.6849	2.68465	0.000247988		523.084	1.7913	0.8936
Q1/2015	2015-03-31	2309.65	360.044	506.54	526.55	312.315	341.106	104076	208.136				Q1/2015	131.63	526.55	526.55	258.91	#N/A	2.67689	Q1/2015	2.6766	2.67689	-0.000294306		526.55	1.6	1.0766
Q2/2015	2015-06-30	2319.07	362.368	507.464	529.411	311.96	340.937	104135	209.432				Q2/2015	132.35	529.411	529.411	260.327	#N/A	2.19117	Q2/2015	2.1915	2.19117	0.000329272		529.411	1.6	0.5915
Q3/2015	2015-09-30	2327.14	363.568	508.516	534.887	312.688	343.182	104499	210.644				Q3/2015	133.72	534.887	534.887	263.021	#N/A	4.20207	Q3/2015	4.2022	4.20207	0.000134325		534.887	1.6	2.6022
Q4/2015	2015-12-31	2335.72	362.268	510.344	539.919	312.002	344.03	105387	211.224				Q4/2015	134.98	539.919	539.919	265.5	#N/A	3.81647	Q4/2015	3.8166	3.81647	0.000126676		539.919	1.6	2.2166
Q1/2016	2016-03-31	2337.95	365.764	512.264	548.047	315.037	347.666	106651	211.384				Q1/2016	137.01	548.047	548.047	269.493	#N/A	6.15899	Q1/2016	6.1586	6.15899	-0.000389522
Q2/2016	2016-06-30	2341.87	364.836	513.616	551.994	314.044	350.973	105415	211.356				Q2/2016	138	551.994	551.994	271.44	#N/A	2.91205	Q2/2016	2.9118	2.91205	-0.000245251
Q3/2016	2016-09-30	2352.49	364.896	515.156	553.079	313.159	350.144	105866	212.392				Q3/2016	138.27	553.079	553.079	271.971	#N/A	0.788562	Q3/2016	0.7889	0.788562	0.000338378
Q4/2016	2016-12-31	2349.25	364.952	516.996	555.94	313.884	351.162	105648	211.208				Q4/2016	138.99	555.94	555.94	273.387	#N/A	2.08525	Q4/2016	2.0855	2.08525	0.000245646
Q1/2017	2017-03-31	2339.5	364.44	518.96	557.568	314.453	354.569	105898	213.488				Q1/2017	139.1	557.568	557.568	273.603	#N/A	1.1765	Q1/2017	1.1765	1.1765	-4.70135e-06
Q2/2017	2017-06-30	2341.82	365.612	521.52	559.443	314.406	355.841	106100	214.472				Q2/2017	139.86	559.443	559.443	275.098	#N/A	1.35193	Q2/2017	1.3517	1.35193	-0.000227764
Q3/2017	2017-09-30	2351.25	365.348	524.372	562.107	314.219	358.993	106142	215.352				Q3/2017	140.6	562.107	562.107	276.554	#N/A	1.9184	Q3/2017	1.9184	1.9184	-2.29383e-07
Q4/2017	2017-12-31	2358.8	366.988	526.264	564.919	314.422	361.512	106142	216.284				Q4/2017	141.21	564.919	564.919	277.754	#N/A	2.01611	Q4/2017	2.0161	2.01611	-8.28867e-06
Q1/2018	2018-03-31	2365.64	368.956	528.004	564.212	315.206	363.039	106178	216.803				Q1/2018	140.47	564.212	564.212	276.298	#N/A	-0.499664	Q1/2018	-0.5	-0.499664	-0.000336237
Q2/2018	2018-06-30	2385.49	370.137	529.588	566.734	315.836	364.572	106550	217.262				Q2/2018		566.734	566.734	0	#N/A	1.8	Q2/2018	1.8	1.8	-4.44635e-06
Q3/2018	2018-09-30	2410.77	371.247	530.912	569.407	316.151	366.202	106715	217.776				Q3/2018		569.407	569.407	0	#N/A	1.89999	Q3/2018	1.9	1.89999	1.14112e-05
Q4/2018	2018-12-31	2436.39	372.361	532.103	572.092	316.467	367.838	106760	218.319				Q4/2018		572.092	572.092	0	#N/A	1.89956	Q4/2018	1.9	1.89956	0.000444024
Q1/2019	2019-03-31	2462.36	373.106	533.167	574.931	316.546	369.483	106910	218.917				Q1/2019		574.931	574.931	0	#N/A	1.99982	Q1/2019	2	1.99982	0.00017986
Q2/2019	2019-06-30	2488.72	373.852	534.02	577.785	316.625	371.134	107140	219.574				Q2/2019		577.785	577.785	0	#N/A	2.00046	Q2/2019	2	2.00046	-0.000463789
Q3/2019	2019-09-30	2515.47	374.599	534.447	580.795	316.704	372.793	107370	220.232				Q3/2019		580.795	580.795	0	#N/A	2.10016	Q3/2019	2.1	2.10016	-0.000160382
Q4/2019	2019-12-31	2542.61	375.349	534.768	583.82	316.783	374.46	107600	220.959				Q4/2019		583.82	583.82	0	#N/A	2.09968	Q4/2019	2.1	2.09968	0.00031582

## Sheet: IMP
Q1/1960 !Q mag=bil	.excel_last	Q111mc@OUTLOOK	Q112mc@OUTLOOK	Q132mc@OUTLOOK		Q136mc@OUTLOOK	Q156mc@OUTLOOK	Q158mc@OUTLOOK	Q184mc@OUTLOOK			GERMANY	Q1/1960 !Q mag=bil	S134NMC@G10	Q134MC@OUTLOOK					Q1/1960 !Q	Q134MCP@OUTLOOK					(Q134MCP@OUTLOOK) - historical
.DESC		US: Imports of Goods & Services, Vol, Natl Accounts Basis(SAAR,Bil.Chn.2009.US$)	UK: Imports of Goods & Serv, Vol, Natl Accounts Basis(SAAR,Bil.Chn.2015.Pound)	France: Imports of Goods & Serv, Vol, Natl Acc Basis(SAAR,Bil.Chn.2010.Euro)	Germany: Imports of Goods & Serv, Volume, National Acct Basis(Bil.Ch.2005.EUR)	Italy: Imports of Goods & Serv, Vol, Natl Accounts Basis(SAAR,Bil.Chn.2010.Euro)	Canada: Imports of Goods & Serv, Vol, Natl Accounts Basis(SAAR,Bil.Chn.2007.C$)	Japan: Imports of Goods & Serv, Vol, Natl Accounts Basis(SAAR,Bil.Chn.2011.Yen)	Spain: Imports of Goods & Serv, Vol, Natl Accounts Basis(SAAR,Bil.Chn.2010.Euro)				.DESC	Germany: GDP: Imports of Goods & Services (SWDA, Bil.Chn.2010.Euros)	Germany: Imports of Goods & Serv, Vol, Natl Acc Basis(SAAR,Bil.Chn.2010.Euro)	Germany: Imports of Goods & Serv, Volume, National Acct Basis(Bil.Ch.2010.EUR)	Comparison			.DESC	Germany: Imports of Goods & Services Growth, Volume (Annualized % Change)	Comparison				Germany: Imports of Goods & Services Growth, Volume(Annualized % Change)
.T1		Q1-1960	Q1-1960	Q1-1960	Q1-1968	Q1-1960	Q1-1961	Q1-1960	Q1-1960				.T1	Q1-1970	Q1-1991					.T1	Q2-1991					Q2-1968
.TN		Q4-2019	Q4-2019	Q4-2019	Q4-2019	Q4-2019	Q4-2019	Q4-2019	Q4-2019				.TN	Q1-2018	Q4-2019					.TN	Q4-2019					Q4-2015
.LSOURCE		Organization for Economic Cooperation & Development	Organization for Economic Cooperation & Development	Organization for Economic Cooperation & Development	Organization for Economic Cooperation & Devt	Organization for Economic Cooperation & Development	Organization for Economic Cooperation & Development	Organization for Economic Cooperation & Development	Organization for Economic Cooperation & Development				.LSOURCE	Deutsche Bundesbank	Organization for Economic Cooperation & Development					.LSOURCE	Organization for Economic Cooperation & Development				Historical Germany Series	Organization for Economic Cooperation & Devt
.DTLM		May-30-2018 07:53	May-30-2018 09:03	May-30-2018 07:53		May-30-2018 07:53	May-30-2018 07:53	May-30-2018 07:53	May-30-2018 07:53				.DTLM	May-24-2018 01:06	May-30-2018 07:53					.DTLM	May-30-2018 07:53					May-09-2014 15:38
Q1/1960	1960-03-31	125.38	49.548	27.872	#N/A	27.853	#N/A	3425	3.7768				Q1/1960	#N/A	#N/A	#N/A	#N/A	#N/A	#N/A	Q1/1960	#N/A	#N/A	#N/A		#N/A	#N/A
Q2/1960	1960-06-30	126.322	51.46	27.6	#N/A	29.261	#N/A	3417	3.8397				Q2/1960	#N/A	#N/A	#N/A	#N/A	#N/A	#N/A	Q2/1960	#N/A	#N/A	#N/A		#N/A	#N/A
Q3/1960	1960-09-30	122.605	51.456	29.264	#N/A	31.172	#N/A	3725	4.0548				Q3/1960	#N/A	#N/A	#N/A	#N/A	#N/A	#N/A	Q3/1960	#N/A	#N/A	#N/A		#N/A	#N/A
Q4/1960	1960-12-31	116.822	51.908	29.396	#N/A	32.747	#N/A	3781	4.4141				Q4/1960	#N/A	#N/A	#N/A	#N/A	#N/A	#N/A	Q4/1960	#N/A	#N/A	#N/A		#N/A	#N/A
Q1/1961	1961-03-31	116.254	52.244	29.38	#N/A	33.049	34.969	4066	4.9176				Q1/1961	#N/A	#N/A	#N/A	#N/A	#N/A	#N/A	Q1/1961	#N/A	#N/A	#N/A		#N/A	#N/A
Q2/1961	1961-06-30	117.671	50.908	30.684	#N/A	34.255	34.861	4409	5.4031				Q2/1961	#N/A	#N/A	#N/A	#N/A	#N/A	#N/A	Q2/1961	#N/A	#N/A	#N/A		#N/A	#N/A
Q3/1961	1961-09-30	125.463	50.092	30.792	#N/A	34.49	35.179	4794	5.8706				Q3/1961	#N/A	#N/A	#N/A	#N/A	#N/A	#N/A	Q3/1961	#N/A	#N/A	#N/A		#N/A	#N/A
Q4/1961	1961-12-31	128.446	49.684	31.72	#N/A	36.099	37.725	4873	6.35				Q4/1961	#N/A	#N/A	#N/A	#N/A	#N/A	#N/A	Q4/1961	#N/A	#N/A	#N/A		#N/A	#N/A
Q1/1962	1962-03-31	132.357	50.9	33.036	#N/A	36.836	37.76	4582	6.8412				Q1/1962	#N/A	#N/A	#N/A	#N/A	#N/A	#N/A	Q1/1962	#N/A	#N/A	#N/A		#N/A	#N/A
Q2/1962	1962-06-30	135.245	51.936	31.68	#N/A	38.613	36.732	4461	7.3275				Q2/1962	#N/A	#N/A	#N/A	#N/A	#N/A	#N/A	Q2/1962	#N/A	#N/A	#N/A		#N/A	#N/A
Q3/1962	1962-09-30	136.961	52.416	32.972	#N/A	40.724	36.346	4434	7.8089				Q3/1962	#N/A	#N/A	#N/A	#N/A	#N/A	#N/A	Q3/1962	#N/A	#N/A	#N/A		#N/A	#N/A
Q4/1962	1962-12-31	138.635	52.008	33.444	#N/A	42.635	35.11	4445	8.3057				Q4/1962	#N/A	#N/A	#N/A	#N/A	#N/A	#N/A	Q4/1962	#N/A	#N/A	#N/A		#N/A	#N/A
Q1/1963	1963-03-31	135.426	50.972	33.52	#N/A	43.506	35.266	4732	8.8177				Q1/1963	#N/A	#N/A	#N/A	#N/A	#N/A	#N/A	Q1/1963	#N/A	#N/A	#N/A		#N/A	#N/A
Q2/1963	1963-06-30	138.614	53.388	37.18	#N/A	47.797	36.25	5125	9.2407				Q2/1963	#N/A	#N/A	#N/A	#N/A	#N/A	#N/A	Q2/1963	#N/A	#N/A	#N/A		#N/A	#N/A
Q3/1963	1963-09-30	142.133	54.984	38.08	#N/A	50.411	37.745	5624	9.5748				Q3/1963	#N/A	#N/A	#N/A	#N/A	#N/A	#N/A	Q3/1963	#N/A	#N/A	#N/A		#N/A	#N/A
Q4/1963	1963-12-31	141.667	55.8	39.864	#N/A	51.919	39.263	5962	9.7706				Q4/1963	#N/A	#N/A	#N/A	#N/A	#N/A	#N/A	Q4/1963	#N/A	#N/A	#N/A		#N/A	#N/A
Q1/1964	1964-03-31	141.534	58.556	42.216	#N/A	49.104	40.78	6165	9.8282				Q1/1964	#N/A	#N/A	#N/A	#N/A	#N/A	#N/A	Q1/1964	#N/A	#N/A	#N/A		#N/A	#N/A
Q2/1964	1964-06-30	144.72	58.768	43.08	#N/A	46.255	42.271	6069	10.147				Q2/1964	#N/A	#N/A	#N/A	#N/A	#N/A	#N/A	Q2/1964	#N/A	#N/A	#N/A		#N/A	#N/A
Q3/1964	1964-09-30	148.604	60.128	42.928	#N/A	42.434	41.588	5981	10.7272				Q3/1964	#N/A	#N/A	#N/A	#N/A	#N/A	#N/A	Q3/1964	#N/A	#N/A	#N/A		#N/A	#N/A
Q4/1964	1964-12-31	152.623	60.988	43.156	#N/A	43.071	42.617	6150	11.5628				Q4/1964	#N/A	#N/A	#N/A	#N/A	#N/A	#N/A	Q4/1964	#N/A	#N/A	#N/A		#N/A	#N/A
Q1/1965	1965-03-31	147.129	57.408	42.492	#N/A	43.004	44.987	6321	12.654				Q1/1965	#N/A	#N/A	#N/A	#N/A	#N/A	#N/A	Q1/1965	#N/A	#N/A	#N/A		#N/A	#N/A
Q2/1965	1965-06-30	164.492	60.116	43.632	#N/A	44.612	46.107	6478	13.6357				Q2/1965	#N/A	#N/A	#N/A	#N/A	#N/A	#N/A	Q2/1965	#N/A	#N/A	#N/A		#N/A	#N/A
Q3/1965	1965-09-30	165.167	61.42	44.304	#N/A	47.093	47.567	6420	14.5081				Q3/1965	#N/A	#N/A	#N/A	#N/A	#N/A	#N/A	Q3/1965	#N/A	#N/A	#N/A		#N/A	#N/A
Q4/1965	1965-12-31	173.226	61.776	45.304	#N/A	49.707	50.944	6509	15.3883				Q4/1965	#N/A	#N/A	#N/A	#N/A	#N/A	#N/A	Q4/1965	#N/A	#N/A	#N/A		#N/A	#N/A
Q1/1966	1966-03-31	177.69	63.096	46.728	#N/A	50.512	51.665	6753	16.2763				Q1/1966	#N/A	#N/A	#N/A	#N/A	#N/A	#N/A	Q1/1966	#N/A	#N/A	#N/A		#N/A	#N/A
Q2/1966	1966-06-30	182.109	61.332	47.808	#N/A	51.148	52.518	7039	16.8337				Q2/1966	#N/A	#N/A	#N/A	#N/A	#N/A	#N/A	Q2/1966	#N/A	#N/A	#N/A		#N/A	#N/A
Q3/1966	1966-09-30	192.323	63.268	49.816	#N/A	53.83	54.323	7334	17.0606				Q3/1966	#N/A	#N/A	#N/A	#N/A	#N/A	#N/A	Q3/1966	#N/A	#N/A	#N/A		#N/A	#N/A
Q4/1966	1966-12-31	194.489	59.116	51.508	#N/A	55.238	56.305	7750	16.9022				Q4/1966	#N/A	#N/A	#N/A	#N/A	#N/A	#N/A	Q4/1966	#N/A	#N/A	#N/A		#N/A	#N/A
Q1/1967	1967-03-31	197.525	64.116	53.696	#N/A	56.981	56.369	8101	16.3585				Q1/1967	#N/A	#N/A	#N/A	#N/A	#N/A	#N/A	Q1/1967	#N/A	#N/A	#N/A		#N/A	#N/A
Q2/1967	1967-06-30	195.956	65.28	52.64	#N/A	61.204	56.972	8898	16.0961				Q2/1967	#N/A	#N/A	#N/A	#N/A	#N/A	#N/A	Q2/1967	#N/A	#N/A	#N/A		#N/A	#N/A
Q3/1967	1967-09-30	198.529	65.772	53.764	#N/A	60.768	56.873	9017	16.1151				Q3/1967	#N/A	#N/A	#N/A	#N/A	#N/A	#N/A	Q3/1967	#N/A	#N/A	#N/A		#N/A	#N/A
Q4/1967	1967-12-31	208.999	69.336	54.744	#N/A	60.399	56.369	9423	16.3207				Q4/1967	#N/A	#N/A	#N/A	#N/A	#N/A	#N/A	Q4/1967	#N/A	#N/A	#N/A		#N/A	#N/A
Q1/1968	1968-03-31	221.313	71.448	57.616	92.196	58.589	61.288	9489	16.7129				Q1/1968	#N/A	#N/A	#N/A	#N/A	#N/A	#N/A	Q1/1968	#N/A	#N/A	#N/A		92.196	#N/A
Q2/1968	1968-06-30	224.688	69.848	52.788	94.2856	60.869	59.194	9775	17.1935				Q2/1968	#N/A	#N/A	#N/A	#N/A	#N/A	#N/A	Q2/1968	#N/A	#N/A	#N/A		94.2856	9.3787
Q3/1968	1968-09-30	238.192	71.972	63.448	100.545	64.924	61.513	10028	17.7626				Q3/1968	#N/A	#N/A	#N/A	#N/A	#N/A	#N/A	Q3/1968	#N/A	#N/A	#N/A		100.545	29.3195
Q4/1968	1968-12-31	236.185	71.516	66.884	105.359	68.343	67.655	10445	18.4855				Q4/1968	#N/A	#N/A	#N/A	#N/A	#N/A	#N/A	Q4/1968	#N/A	#N/A	#N/A		105.359	20.5712
Q1/1969	1969-03-31	213.907	73.888	69.824	107.895	71.494	70.285	10400	19.3623				Q1/1969	#N/A	#N/A	#N/A	#N/A	#N/A	#N/A	Q1/1969	#N/A	#N/A	#N/A		107.895	9.9816
Q2/1969	1969-06-30	256.109	73.136	74.208	112.929	74.142	70.552	10687	20.0986				Q2/1969	#N/A	#N/A	#N/A	#N/A	#N/A	#N/A	Q2/1969	#N/A	#N/A	#N/A		112.929	20.0102
Q3/1969	1969-09-30	252.791	72.848	73.404	116.093	76.689	69.803	11762	20.6944				Q3/1969	#N/A	#N/A	#N/A	#N/A	#N/A	#N/A	Q3/1969	#N/A	#N/A	#N/A		116.093	11.6837
Q4/1969	1969-12-31	250.014	74.24	72.568	122.177	79.304	72.292	12338	21.2154				Q4/1969	#N/A	#N/A	#N/A	#N/A	#N/A	#N/A	Q4/1969	#N/A	#N/A	#N/A		122.177	22.6692
Q1/1970	1970-03-31	249.195	73.068	73.908	138.66	81.494	70.052	12795	22.4278				Q1/1970	34.12	#N/A	#N/A	100	#N/A	#N/A	Q1/1970	#N/A	#N/A	#N/A		138.66	65.9043
Q2/1970	1970-06-30	254.12	76.976	76.656	139.209	86.343	70.757	13560	21.9569				Q2/1970	34.23	#N/A	#N/A	100.322	#N/A	#N/A	Q2/1970	#N/A	#N/A	#N/A		139.209	1.5909
Q3/1970	1970-09-30	253.537	77.36	79.812	140.266	92.567	70.878	14407	21.6345				Q3/1970	34.52	#N/A	#N/A	101.172	#N/A	#N/A	Q3/1970	#N/A	#N/A	#N/A		140.266	3.0728
Q4/1970	1970-12-31	257.469	81.14	80.796	145.2	89.222	66.886	14636	21.4268				Q4/1970	35.73	#N/A	#N/A	104.719	#N/A	#N/A	Q4/1970	#N/A	#N/A	#N/A		145.2	14.8303
Q1/1971	1971-03-31	254.434	79.152	79.768	150.086	92.272	67.966	15603	21.3261				Q1/1971	36.92	#N/A	#N/A	108.206	#N/A	#N/A	Q1/1971	#N/A	#N/A	#N/A		150.086	14.1542
Q2/1971	1971-06-30	273.627	82.164	81.844	148.754	87.948	73.05	15079	21.4709				Q2/1971	36.61	#N/A	#N/A	107.298	#N/A	#N/A	Q2/1971	#N/A	#N/A	#N/A		148.754	-3.5013
Q3/1971	1971-09-30	279.676	80.732	86.232	150.947	90.546	77.188	14388	22.0732				Q3/1971	37.14	#N/A	#N/A	108.851	#N/A	#N/A	Q3/1971	#N/A	#N/A	#N/A		150.947	6.0279
Q4/1971	1971-12-31	260.719	83.084	85.864	153.179	89.106	78.795	14232	23.1943				Q4/1971	37.69	#N/A	#N/A	110.463	#N/A	#N/A	Q4/1971	#N/A	#N/A	#N/A		153.179	6.0468
Q1/1972	1972-03-31	298.823	86.46	92.904	157.428	93.784	79.066	15821	25.0571				Q1/1972	38.71	#N/A	#N/A	113.453	#N/A	#N/A	Q1/1972	#N/A	#N/A	#N/A		157.428	11.5667
Q2/1972	1972-06-30	288.206	88.1	94.02	159.856	96.784	83.849	15230	26.709				Q2/1972	39.33	#N/A	#N/A	115.27	#N/A	#N/A	Q2/1972	#N/A	#N/A	#N/A		159.856	6.3134
Q3/1972	1972-09-30	294.205	85.856	95.376	159.347	102.64	86.397	16817	28.1912				Q3/1972	39.21	#N/A	#N/A	114.918	#N/A	#N/A	Q3/1972	#N/A	#N/A	#N/A		159.347	-1.2679
Q4/1972	1972-12-31	307.457	96.784	100.82	165.965	102.064	90.211	17660	29.507				Q4/1972	40.83	#N/A	#N/A	119.666	#N/A	#N/A	Q4/1972	#N/A	#N/A	#N/A		165.965	17.6774
Q1/1973	1973-03-31	321.664	96.924	106.156	163.694	100.172	94.596	18887	30.7045				Q1/1973	40.26	#N/A	#N/A	117.995	#N/A	#N/A	Q1/1973	#N/A	#N/A	#N/A		163.694	-5.3629
Q2/1973	1973-06-30	312.393	97.508	107.772	164.947	106.096	94.994	20313	31.6881				Q2/1973	40.57	#N/A	#N/A	118.904	#N/A	#N/A	Q2/1973	#N/A	#N/A	#N/A		164.947	3.0975
Q3/1973	1973-09-30	303.763	100.348	112.188	164.673	111.579	96.39	20648	32.3821				Q3/1973	40.52	#N/A	#N/A	118.757	#N/A	#N/A	Q3/1973	#N/A	#N/A	#N/A		164.673	-0.6631
Q4/1973	1973-12-31	306.031	102.1	114.388	175.599	112.082	102.481	21624	32.968				Q4/1973	43.19	#N/A	#N/A	126.583	#N/A	#N/A	Q4/1973	#N/A	#N/A	#N/A		175.599	29.3
Q1/1974	1974-03-31	295.652	99.28	117.656	164.585	116.286	105.644	21506	33.7814				Q1/1974	40.5	#N/A	#N/A	118.699	#N/A	#N/A	Q1/1974	#N/A	#N/A	#N/A		164.585	-22.8255
Q2/1974	1974-06-30	311.316	101.76	118.516	169.324	110.647	106.163	21697	34.6089				Q2/1974	41.64	#N/A	#N/A	122.04	#N/A	#N/A	Q2/1974	#N/A	#N/A	#N/A		169.324	12.0227
Q3/1974	1974-09-30	305.874	100.912	117.892	173.239	116.002	108.465	21097	34.9272				Q3/1974	42.61	#N/A	#N/A	124.883	#N/A	#N/A	Q3/1974	#N/A	#N/A	#N/A		173.239	9.5766
Q4/1974	1974-12-31	302.838	99.572	110.676	166.152	103.325	107.352	20579	34.637				Q4/1974	40.85	#N/A	#N/A	119.725	#N/A	#N/A	Q4/1974	#N/A	#N/A	#N/A		166.152	-15.3881
Q1/1975	1975-03-31	272.449	95.556	103.664	167.111	90.924	105.345	19245	34.0224				Q1/1975	41.09	#N/A	#N/A	120.428	#N/A	#N/A	Q1/1975	#N/A	#N/A	#N/A		167.111	2.3288
Q2/1975	1975-06-30	250.647	90.592	103.852	172.476	93.64	102.72	18892	33.7835				Q2/1975	42.42	#N/A	#N/A	124.326	#N/A	#N/A	Q2/1975	#N/A	#N/A	#N/A		172.476	13.4746
Q3/1975	1975-09-30	271.484	95.672	105.28	172.829	101.386	102.696	19007	34.0501				Q3/1975	42.52	#N/A	#N/A	124.619	#N/A	#N/A	Q3/1975	#N/A	#N/A	#N/A		172.829	0.82
Q4/1975	1975-12-31	285.975	93.676	110.584	179.525	107.145	104.421	19000	34.8567				Q4/1975	44.14	#N/A	#N/A	129.367	#N/A	#N/A	Q4/1975	#N/A	#N/A	#N/A		179.525	16.4239
Q1/1976	1976-03-31	303.893	92.46	118.836	183.5	109.54	108.487	19595	36.3262				Q1/1976	45.14	#N/A	#N/A	132.298	#N/A	#N/A	Q1/1976	#N/A	#N/A	#N/A		183.5	9.1548
Q2/1976	1976-06-30	317.055	100.04	124.444	188.434	109.344	112.513	19922	37.6168				Q2/1976	46.38	#N/A	#N/A	135.932	#N/A	#N/A	Q2/1976	#N/A	#N/A	#N/A		188.434	11.1972
Q3/1976	1976-09-30	329.991	101.16	129.308	191.92	104.98	109.97	20726	38.2629				Q3/1976	47.19	#N/A	#N/A	138.306	#N/A	#N/A	Q3/1976	#N/A	#N/A	#N/A		191.92	7.6059
Q4/1976	1976-12-31	340.913	101.272	129.708	195.483	109.881	109.656	20985	37.9118				Q4/1976	48.09	#N/A	#N/A	140.944	#N/A	#N/A	Q4/1976	#N/A	#N/A	#N/A		195.483	7.6365
Q1/1977	1977-03-31	357.052	100.476	128.18	193.712	106.379	110.279	20855	36.6045				Q1/1977	47.66	#N/A	#N/A	139.683	#N/A	#N/A	Q1/1977	#N/A	#N/A	#N/A		193.712	-3.5757
Q2/1977	1977-06-30	360.344	102.932	127.864	193.633	112.846	111.727	21131	35.5805				Q2/1977	47.64	#N/A	#N/A	139.625	#N/A	#N/A	Q2/1977	#N/A	#N/A	#N/A		193.633	-0.1617
Q3/1977	1977-09-30	355.321	100.252	127.384	202.287	109.196	109.997	21495	34.9426				Q3/1977	49.76	#N/A	#N/A	145.838	#N/A	#N/A	Q3/1977	#N/A	#N/A	#N/A		202.287	19.1112
Q4/1977	1977-12-31	360.362	98.928	127.756	199.389	114.104	107.016	21069	34.7349				Q4/1977	49.04	#N/A	#N/A	143.728	#N/A	#N/A	Q4/1977	#N/A	#N/A	#N/A		199.389	-5.6079
Q1/1978	1978-03-31	384.539	105.628	130.744	201.015	104.764	106.66	21511	34.6428				Q1/1978	49.45	#N/A	#N/A	144.93	#N/A	#N/A	Q1/1978	#N/A	#N/A	#N/A		201.015	3.3008
Q2/1978	1978-06-30	385.756	106.244	132.796	204.304	111.546	112.617	22039	34.5799				Q2/1978	50.26	#N/A	#N/A	147.304	#N/A	#N/A	Q2/1978	#N/A	#N/A	#N/A		204.304	6.7084
Q3/1978	1978-09-30	390.794	106.096	133.352	211.667	121.598	113.789	22399	35.0528				Q3/1978	52.07	#N/A	#N/A	152.608	#N/A	#N/A	Q3/1978	#N/A	#N/A	#N/A		211.667	15.2125
Q4/1978	1978-12-31	396.154	99.804	136.992	217.423	130.639	119.755	24443	36.1705				Q4/1978	53.49	#N/A	#N/A	156.77	#N/A	#N/A	Q4/1978	#N/A	#N/A	#N/A		217.423	11.3308
Q1/1979	1979-03-31	395.069	106.616	141.492	218.598	122.706	120.568	25501	37.4169				Q1/1979	53.76	#N/A	#N/A	157.562	#N/A	#N/A	Q1/1979	#N/A	#N/A	#N/A		218.598	2.1789
Q2/1979	1979-06-30	397.203	115.74	142.66	229.485	129.444	119.266	25367	38.6373				Q2/1979	56.45	#N/A	#N/A	165.445	#N/A	#N/A	Q2/1979	#N/A	#N/A	#N/A		229.485	21.4594
Q3/1979	1979-09-30	391.145	118.112	148.276	233.049	131.262	122.215	25851	39.7841				Q3/1979	57.33	#N/A	#N/A	168.025	#N/A	#N/A	Q3/1979	#N/A	#N/A	#N/A		233.049	6.3578
Q4/1979	1979-12-31	399.691	117.536	148.548	237.944	137.293	123.22	25346	40.614				Q4/1979	58.52	#N/A	#N/A	171.512	#N/A	#N/A	Q4/1979	#N/A	#N/A	#N/A		237.944	8.6703
Q1/1980	1980-03-31	399.987	119.36	152.576	242.565	140.417	121.263	23495	41.2955				Q1/1980	59.68	#N/A	#N/A	174.912	#N/A	#N/A	Q1/1980	#N/A	#N/A	#N/A		242.565	7.9976
Q2/1980	1980-06-30	370.96	115.02	152.856	237.826	135.469	116.557	24621	40.1404				Q2/1980	58.49	#N/A	#N/A	171.424	#N/A	#N/A	Q2/1980	#N/A	#N/A	#N/A		237.826	-7.5881
Q3/1980	1980-09-30	344.28	105.34	153.036	230.777	138.545	112.691	23085	40.9365				Q3/1980	56.76	#N/A	#N/A	166.354	#N/A	#N/A	Q3/1980	#N/A	#N/A	#N/A		230.777	-11.3389
Q4/1980	1980-12-31	362.754	102.888	150.6	233.754	134.818	119.847	22943	39.2403				Q4/1980	57.52	#N/A	#N/A	168.581	#N/A	#N/A	Q4/1980	#N/A	#N/A	#N/A		233.754	5.2593
Q1/1981	1981-03-31	378.305	98.656	148.392	234.164	135.601	118.376	23342	37.6534				Q1/1981	57.61	#N/A	#N/A	168.845	#N/A	#N/A	Q1/1981	#N/A	#N/A	#N/A		234.164	0.7048
Q2/1981	1981-06-30	378.876	104.1	148.164	228.643	136.3	125.817	24097	39.36				Q2/1981	56.23	#N/A	#N/A	164.801	#N/A	#N/A	Q2/1981	#N/A	#N/A	#N/A		228.643	-9.1031
Q3/1981	1981-09-30	374.553	115.76	150.86	228.878	134.143	120.111	24143	39.0634				Q3/1981	56.3	#N/A	#N/A	165.006	#N/A	#N/A	Q3/1981	#N/A	#N/A	#N/A		228.878	0.4116
Q4/1981	1981-12-31	385.294	112.164	153.58	225.628	134.65	115.496	24572	39.7086				Q4/1981	55.52	#N/A	#N/A	162.72	#N/A	#N/A	Q4/1981	#N/A	#N/A	#N/A		225.628	-5.5602
Q1/1982	1982-03-31	374.31	111.532	153.668	233.362	141.617	106.577	24965	40.541				Q1/1982	57.4	#N/A	#N/A	168.23	#N/A	#N/A	Q1/1982	#N/A	#N/A	#N/A		233.362	14.4323
Q2/1982	1982-06-30	368.193	116.268	157.588	230.033	133.112	100.806	23894	40.7856				Q2/1982	56.59	#N/A	#N/A	165.856	#N/A	#N/A	Q2/1982	#N/A	#N/A	#N/A		230.033	-5.5847
Q3/1982	1982-09-30	385.277	112.712	156.26	224.277	135.65	100.433	23637	40.8896				Q3/1982	55.16	#N/A	#N/A	161.665	#N/A	#N/A	Q3/1982	#N/A	#N/A	#N/A		224.277	-9.6407
Q4/1982	1982-12-31	370.154	111.376	154.456	219.851	128.614	95.344	23011	41.2434				Q4/1982	54.09	#N/A	#N/A	158.529	#N/A	#N/A	Q4/1982	#N/A	#N/A	#N/A		219.851	-7.6619
Q1/1983	1983-03-31	378.63	116.688	153.712	222.406	125.723	100.785	22574	42.0031				Q1/1983	54.71	#N/A	#N/A	160.346	#N/A	#N/A	Q1/1983	#N/A	#N/A	#N/A		222.406	4.73
Q2/1983	1983-06-30	407.739	119.692	149.668	233.724	131.475	105.449	22533	40.6971				Q2/1983	57.49	#N/A	#N/A	168.494	#N/A	#N/A	Q2/1983	#N/A	#N/A	#N/A		233.724	21.9629
Q3/1983	1983-09-30	439.499	120.424	150.912	235.447	131.863	114.192	22679	38.7512				Q3/1983	57.9	#N/A	#N/A	169.695	#N/A	#N/A	Q3/1983	#N/A	#N/A	#N/A		235.447	2.9818
Q4/1983	1983-12-31	461.058	124.68	151.616	238.385	136.377	123.717	24433	40.0572				Q4/1983	58.64	#N/A	#N/A	171.864	#N/A	#N/A	Q4/1983	#N/A	#N/A	#N/A		238.385	5.0841
Q1/1984	1984-03-31	498.126	126.168	155.952	241.508	141.693	128.508	25121	39.7294				Q1/1984	59.4	#N/A	#N/A	174.091	#N/A	#N/A	Q1/1984	#N/A	#N/A	#N/A		241.508	5.344
Q2/1984	1984-06-30	518.994	131.712	157.528	243.231	144.63	130.077	25210	38.6836				Q2/1984	59.83	#N/A	#N/A	175.352	#N/A	#N/A	Q2/1984	#N/A	#N/A	#N/A		243.231	2.8846
Q3/1984	1984-09-30	532.427	132.764	155.68	251.024	152.497	134.398	26059	41.4464				Q3/1984	61.75	#N/A	#N/A	180.979	#N/A	#N/A	Q3/1984	#N/A	#N/A	#N/A		251.024	13.4452
Q4/1984	1984-12-31	548.027	138.2	158.604	249.026	152.655	128.837	25545	39.4953				Q4/1984	61.25	#N/A	#N/A	179.513	#N/A	#N/A	Q4/1984	#N/A	#N/A	#N/A		249.026	-3.1448
Q1/1985	1985-03-31	535.931	138.576	160.928	260.06	155.698	134.383	25558	41.6441				Q1/1985	63.95	#N/A	#N/A	187.427	#N/A	#N/A	Q1/1985	#N/A	#N/A	#N/A		260.06	18.9358
Q2/1985	1985-06-30	562.267	134.932	162.112	254.304	152.104	141.147	25142	42.4921				Q2/1985	62.56	#N/A	#N/A	183.353	#N/A	#N/A	Q2/1985	#N/A	#N/A	#N/A		254.304	-8.5644
Q3/1985	1985-09-30	556.844	132.288	165.744	259.238	153.683	144.64	24272	42.617				Q3/1985	63.78	#N/A	#N/A	186.928	#N/A	#N/A	Q3/1985	#N/A	#N/A	#N/A		259.238	7.9899
Q4/1985	1985-12-31	578.666	136.44	168.46	255.87	156.336	145.435	24221	44.6253				Q4/1985	62.95	#N/A	#N/A	184.496	#N/A	#N/A	Q4/1985	#N/A	#N/A	#N/A		255.87	-5.0961
Q1/1986	1986-03-31	578.132	140.176	170.616	261.225	158.619	148.426	24184	43.0176				Q1/1986	64.25	#N/A	#N/A	188.306	#N/A	#N/A	Q1/1986	#N/A	#N/A	#N/A		261.225	8.6388
Q2/1986	1986-06-30	602.749	145.108	174.856	266.708	161.138	147.403	25716	49.1571				Q2/1986	65.61	#N/A	#N/A	192.292	#N/A	#N/A	Q2/1986	#N/A	#N/A	#N/A		266.708	8.6625
Q3/1986	1986-09-30	619.447	146.232	179.448	265.22	169.231	153.621	26542	52.2424				Q3/1986	65.23	#N/A	#N/A	191.178	#N/A	#N/A	Q3/1986	#N/A	#N/A	#N/A		265.22	-2.213
Q4/1986	1986-12-31	624.217	148.276	175.26	267.099	164.972	153.489	26476	56.4203				Q4/1986	65.68	#N/A	#N/A	192.497	#N/A	#N/A	Q4/1986	#N/A	#N/A	#N/A		267.099	2.865
Q1/1987	1987-03-31	620.49	146.712	183.02	270.526	172.626	151.988	26026	58.7772				Q1/1987	66.54	#N/A	#N/A	195.018	#N/A	#N/A	Q1/1987	#N/A	#N/A	#N/A		270.526	5.2315
Q2/1987	1987-06-30	635.965	154.008	186.488	276.439	174.758	154.194	27647	60.2445				Q2/1987	67.97	#N/A	#N/A	199.209	#N/A	#N/A	Q2/1987	#N/A	#N/A	#N/A		276.439	9.0343
Q3/1987	1987-09-30	648.334	161.124	189.604	277.223	187.832	158.336	28744	65.4057				Q3/1987	68.18	#N/A	#N/A	199.824	#N/A	#N/A	Q3/1987	#N/A	#N/A	#N/A		277.223	1.1382
Q4/1987	1987-12-31	663.238	164.2	195.028	281.961	191.037	171.167	29782	66.1914				Q4/1987	69.35	#N/A	#N/A	203.253	#N/A	#N/A	Q4/1987	#N/A	#N/A	#N/A		281.961	7.0145
Q1/1988	1988-03-31	660.132	166.416	198.528	274.99	181.599	177.834	31397	67.9083				Q1/1988	67.64	#N/A	#N/A	198.242	#N/A	#N/A	Q1/1988	#N/A	#N/A	#N/A		274.99	-9.5282
Q2/1988	1988-06-30	652.541	173.428	201.06	287.679	191.451	177.859	32896	70.4213				Q2/1988	70.75	#N/A	#N/A	207.356	#N/A	#N/A	Q2/1988	#N/A	#N/A	#N/A		287.679	19.7734
Q3/1988	1988-09-30	667.944	178.144	208.156	294.493	196.102	182.239	34560	73.9853				Q3/1988	72.42	#N/A	#N/A	212.251	#N/A	#N/A	Q3/1988	#N/A	#N/A	#N/A		294.493	9.8165
Q4/1988	1988-12-31	688.292	188.256	211.032	302.09	202.855	184.215	34285	78.6211				Q4/1988	74.3	#N/A	#N/A	217.761	#N/A	#N/A	Q4/1988	#N/A	#N/A	#N/A		302.09	10.7254
Q1/1989	1989-03-31	691.488	191.112	216.056	305.831	208.193	189.106	38101	82.2527				Q1/1989	75.23	#N/A	#N/A	220.487	#N/A	#N/A	Q1/1989	#N/A	#N/A	#N/A		305.831	5.0456
Q2/1989	1989-06-30	694.762	187.344	220.62	312.918	211.401	190.378	38489	84.3131				Q2/1989	76.97	#N/A	#N/A	225.586	#N/A	#N/A	Q2/1989	#N/A	#N/A	#N/A		312.918	9.5975
Q3/1989	1989-09-30	693.816	191.732	220.956	317.422	208.489	189.146	39704	86.9302				Q3/1989	78.09	#N/A	#N/A	228.869	#N/A	#N/A	Q3/1989	#N/A	#N/A	#N/A		317.422	5.8819
Q4/1989	1989-12-31	706.369	188.66	229.616	327.681	212.615	195.697	40801	88.9697				Q4/1989	80.59	#N/A	#N/A	236.196	#N/A	#N/A	Q4/1989	#N/A	#N/A	#N/A		327.681	13.5691
Q1/1990	1990-03-31	728.771	193.788	230.368	332.862	222.559	196.936	41796	91.4931				Q1/1990	81.9	#N/A	#N/A	240.035	#N/A	#N/A	Q1/1990	#N/A	#N/A	#N/A		332.862	6.4752
Q2/1990	1990-06-30	727.55	193.272	233.192	336.464	227.342	197.47	42249	94.5264				Q2/1990	82.75	#N/A	#N/A	242.526	#N/A	#N/A	Q2/1990	#N/A	#N/A	#N/A		336.464	4.4002
Q3/1990	1990-09-30	724.613	189.876	233.568	362.349	226.248	193.685	41747	94.5368				Q3/1990	89.11	#N/A	#N/A	261.166	#N/A	#N/A	Q3/1990	#N/A	#N/A	#N/A		362.349	34.5096
Q4/1990	1990-12-31	705.18	186.58	234.436	381.342	241.798	191.132	44037	94.8698				Q4/1990	93.8	#N/A	#N/A	274.912	#N/A	#N/A	Q4/1990	#N/A	#N/A	#N/A		381.342	22.673
Q1/1991	1991-03-31	697.143	180.944	237.988	388.965	231.28	191.481	41450	100.255				Q1/1991	96.87	388.965	388.965	283.91	#N/A	#N/A	Q1/1991	#N/A	#N/A	#N/A		388.965	8.239
Q2/1991	1991-06-30	709.534	181.58	238.212	392.12	237.026	195.321	41481	103.538				Q2/1991	97.66	392.12	392.12	286.225	#N/A	3.2842	Q2/1991	3.2837	3.2842	-0.000497376		392.12	0.5659
Q3/1991	1991-09-30	729.501	182.764	240.72	395.37	233.277	204.365	42484	102.476				Q3/1991	98.47	395.37	395.37	288.599	#N/A	3.35676	Q3/1991	3.3569	3.35676	0.000142799		395.37	2.8498
Q4/1991	1991-12-31	745.616	185.396	238.556	395.37	236.755	208.24	42525	107.971				Q4/1991	98.47	395.37	395.37	288.599	#N/A	0	Q4/1991	0	0	0		395.37	3.5667
Q1/1992	1992-03-31	751.033	189.004	247.708	409.83	253.558	207.839	42038	111.993				Q1/1992	102.06	409.83	409.83	299.121	#N/A	15.4516	Q1/1992	15.451	15.4516	-0.000647156		409.83	11.1214
Q2/1992	1992-06-30	763.38	197.632	243.824	398.931	252.13	210.05	42027	112.185				Q2/1992	99.35	398.931	398.931	291.178	#N/A	-10.2207	Q2/1992	-10.22	-10.2207	0.000711703		398.931	-10.0261
Q3/1992	1992-09-30	775.414	195.696	241.632	398.74	249.953	213.542	41253	112.024				Q3/1992	99.3	398.74	398.74	291.032	#N/A	-0.191374	Q3/1992	-0.1916	-0.191374	-0.000225679		398.74	-2.124
Q4/1992	1992-12-31	793.976	198.052	238.848	403.711	244.757	209.064	40796	106.301				Q4/1992	100.54	403.711	403.711	294.666	#N/A	5.08074	Q4/1992	5.0809	5.08074	0.0001622		403.711	4.7051
Q1/1993	1993-03-31	811.166	200.108	237.004	370.73	227.55	218.582	41027	104.657				Q1/1993	92.32	370.73	370.73	270.574	#N/A	-28.8871	Q1/1993	-28.8874	-28.8871	-0.00033333		370.73	-28.4693
Q2/1993	1993-06-30	827.925	198.364	231.756	373.98	221.676	225.469	40508	102.195				Q2/1993	93.13	373.98	373.98	272.948	#N/A	3.55298	Q2/1993	3.5533	3.55298	0.000324042		373.98	5.2425
Q3/1993	1993-09-30	838.828	202.66	233.06	380.194	218.625	226.744	40915	103.585				Q3/1993	94.68	380.194	380.194	277.491	#N/A	6.81384	Q3/1993	6.8137	6.81384	-0.000139433		380.194	6.7656
Q4/1993	1993-12-31	872.527	205.28	239.2	380.576	219.227	232.678	41529	108.949				Q4/1993	94.77	380.576	380.576	277.755	#N/A	0.402506	Q4/1993	0.4029	0.402506	0.000393798		380.576	1.0027
Q1/1994	1994-03-31	892.855	210.624	244.512	387.696	230.294	232.553	43068	112.05				Q1/1994	96.54	387.696	387.696	282.943	#N/A	7.69603	Q1/1994	7.6958	7.69603	-0.00022951		387.696	7.5101
Q2/1994	1994-06-30	926.123	212.5	253.02	405.097	236.737	243.273	43764	113.808				Q2/1994	100.87	405.097	405.097	295.633	#N/A	19.1985	Q2/1994	19.1984	19.1985	-0.000110044		405.097	18.5346
Q3/1994	1994-09-30	952.166	211.392	259.128	414.945	240.627	245.49	45079	117.992				Q3/1994	103.32	414.945	414.945	302.814	#N/A	10.0845	Q3/1994	10.0843	10.0845	-0.000164793		414.945	11.4838
Q4/1994	1994-12-31	978.956	220.104	269.624	422.116	256.552	257.203	45506	123.543				Q4/1994	105.11	422.116	422.116	308.06	#N/A	7.09399	Q4/1994	7.0937	7.09399	-0.000293395		422.116	7.5041
Q1/1995	1995-03-31	1000.44	216.704	270.756	424.862	259.101	257.261	47129	128.012				Q1/1995	105.8	424.862	424.862	310.082	#N/A	2.62763	Q1/1995	2.6277	2.62763	6.98567e-05		424.862	0.9176
Q2/1995	1995-06-30	1009.94	224.54	276.6	437.386	267.737	259.369	48479	129.66				Q2/1995	108.92	437.386	437.386	319.226	#N/A	12.3228	Q2/1995	12.3229	12.3228	9.12782e-05		437.386	14.6
Q3/1995	1995-09-30	1013.41	229.492	278.304	441.592	265.257	258.062	51158	128.004				Q3/1995	109.96	441.592	441.592	322.274	#N/A	3.90233	Q3/1995	3.9028	3.90233	0.000472442		441.592	2.7655
Q4/1995	1995-12-31	1026.36	231.392	278.4	444.365	268.195	260.859	53575	133.444				Q4/1995	110.65	444.365	444.365	324.297	#N/A	2.53558	Q4/1995	2.5351	2.53558	-0.000479735		444.365	2.9657
Q1/1996	1996-03-31	1059.73	241.156	280.876	446.707	265.993	266.47	54302	134.376				Q1/1996	111.25	446.707	446.707	326.055	#N/A	2.1249	Q1/1996	2.1251	2.1249	0.00019799		446.707	3.1431
Q2/1996	1996-06-30	1083.44	243.976	280.636	449.479	255.554	266.147	55922	138.556				Q2/1996	111.94	449.479	449.479	328.077	#N/A	2.50536	Q2/1996	2.5056	2.50536	0.00023608		449.479	2.1309
Q3/1996	1996-09-30	1118.57	248.796	281.444	454.259	259.072	276.229	55814	140.896				Q3/1996	113.13	454.259	454.259	331.565	#N/A	4.32215	Q3/1996	4.3218	4.32215	-0.000352213		454.259	5.2165
Q4/1996	1996-12-31	1140.63	254.104	285.708	470.127	266.92	282.218	56398	143.716				Q4/1996	117.08	470.127	470.127	343.142	#N/A	14.722	Q4/1996	14.7225	14.722	0.000525287		470.127	16.1194
Q1/1997	1997-03-31	1189.34	254.448	289.54	484.373	273.01	299.392	57018	145.376				Q1/1997	120.63	484.373	484.373	353.546	#N/A	12.6831	Q1/1997	12.6826	12.6831	-0.000537435		484.373	9.5414
Q2/1997	1997-06-30	1229.27	266.604	298.16	488.579	286.494	306.109	55924	155.44				Q2/1997	121.68	488.579	488.579	356.624	#N/A	3.51886	Q2/1997	3.519	3.51886	0.000140495		488.579	3.7672
Q3/1997	1997-09-30	1274.58	270.656	310.78	504.734	293.971	318.847	55715	160.78				Q3/1997	125.7	504.734	504.734	368.406	#N/A	13.8967	Q3/1997	13.897	13.8967	0.000321842		504.734	12.9169
Q4/1997	1997-12-31	1302.11	278.164	320.36	510.183	300.089	323.627	54553	167.904				Q4/1997	127.06	510.183	510.183	372.392	#N/A	4.38875	Q4/1997	4.3886	4.38875	-0.000148245		510.183	5.1718
Q1/1998	1998-03-31	1350.98	284.472	333	530.833	313.132	327.842	54153	170.508				Q1/1998	132.2	530.833	530.833	387.456	#N/A	17.2	Q1/1998	17.2004	17.2	0.000370391		530.833	17.0449
Q2/1998	1998-06-30	1381.93	294.972	339.244	542.687	311.246	329.671	51746	176.736				Q2/1998	135.15	542.687	542.687	396.102	#N/A	9.23606	Q2/1998	9.2357	9.23606	-0.000357814		542.687	9.3506
Q3/1998	1998-09-30	1400.53	292.264	344.268	546.798	310.786	321.947	51812	181.496				Q3/1998	136.18	546.798	546.798	399.121	#N/A	3.06471	Q3/1998	3.0644	3.06471	-0.000312625		546.798	2.5243
Q4/1998	1998-12-31	1445.75	297.076	347.676	544.503	317.805	335.153	50525	189.556				Q4/1998	135.6	544.503	544.503	397.421	#N/A	-1.66832	Q4/1998	-1.6678	-1.66832	0.000524796		544.503	-0.4039
Q1/1999	1999-03-31	1466.88	302.476	349.572	568.259	320.575	341.628	52060	195.684				Q1/1999	141.51	568.259	568.259	414.742	#N/A	18.6272	Q1/1999	18.6267	18.6272	-0.000473691		568.259	13.0625
Q2/1999	1999-06-30	1509.02	305.796	357.636	584.32	317.8	347.895	53081	200.788				Q2/1999	145.51	584.32	584.32	426.465	#N/A	11.7938	Q2/1999	11.794	11.7938	0.000200893		584.32	16.9758
Q3/1999	1999-09-30	1565.24	318.056	367.012	599.33	327.062	356.529	54483	207.144				Q3/1999	149.24	599.33	599.33	437.397	#N/A	10.6779	Q3/1999	10.6776	10.6779	-0.000338898		599.33	8.6284
Q4/1999	1999-12-31	1603.78	328.072	380.36	599.138	338.882	374.576	56121	214.44				Q4/1999	149.2	599.138	599.138	437.28	#N/A	-0.128082	Q4/1999	-0.1276	-0.128082	0.000481529		599.138	1.8625
Q1/2000	2000-03-31	1668.15	329.984	398.048	621.366	345.344	382.774	56001	220.236				Q1/2000	154.74	621.366	621.366	453.517	#N/A	15.6864	Q1/2000	15.6859	15.6864	-0.000546629		621.366	14.191
Q2/2000	2000-06-30	1719.61	341.708	414.888	640.198	357.411	384.898	58204	221.588				Q2/2000	159.43	640.198	640.198	467.263	#N/A	12.6853	Q2/2000	12.6854	12.6853	8.86131e-05		640.198	10.5718
Q3/2000	2000-09-30	1779.04	344.268	430.536	660.846	372.638	388.625	59675	226.992				Q3/2000	164.58	660.846	660.846	482.356	#N/A	13.5387	Q3/2000	13.539	13.5387	0.000327988		660.846	13.9766
Q4/2000	2000-12-31	1778.07	357.008	443.856	694.687	376.065	385.086	61856	226.884				Q4/2000	173	694.687	694.687	507.034	#N/A	22.1112	Q4/2000	22.1109	22.1112	-0.000335306		694.687	20.9153
Q1/2001	2001-03-31	1748.47	362.12	437.932	670.406	366.879	374.658	61931	233.156				Q1/2001	166.96	670.406	670.406	489.332	#N/A	-13.2649	Q1/2001	-13.2648	-13.2649	0.000100153		670.406	-11.3966
Q2/2001	2001-06-30	1696.81	364.652	435.012	670.788	373.5	372.224	60496	232.284				Q2/2001	167.05	670.788	670.788	489.596	#N/A	0.228116	Q2/2001	0.2283	0.228116	0.000183532		670.788	-0.7531
Q3/2001	2001-09-30	1662.8	359.304	428.98	656.354	371.642	363.882	58749	232.704				Q3/2001	163.46	656.354	656.354	479.074	#N/A	-8.33334	Q3/2001	-8.3337	-8.33334	-0.000359732		656.354	-5.4648
Q4/2001	2001-12-31	1639.79	356.536	424.708	649.662	363.862	354.962	56987	228.956				Q4/2001	161.79	649.662	649.662	474.179	#N/A	-4.01634	Q4/2001	-4.0162	-4.01634	0.000138296		649.662	-5.3105
Q1/2002	2002-03-31	1686.9	371.672	434.804	628.176	367.842	357.016	57526	232.3				Q1/2002	156.43	628.176	628.176	458.47	#N/A	-12.5871	Q1/2002	-12.5872	-12.5871	-9.42585e-05		628.176	-7.269
Q2/2002	2002-06-30	1739.8	386.556	438.284	643.376	367.051	374.125	59235	238.732				Q2/2002	160.22	643.376	643.376	469.578	#N/A	10.0358	Q2/2002	10.0359	10.0358	8.46198e-05		643.376	7.9039
Q3/2002	2002-09-30	1765.58	383.72	442.444	647.391	369.354	381.065	61040	239.468				Q3/2002	161.22	647.391	647.391	472.509	#N/A	2.51967	Q3/2002	2.5197	2.51967	2.86858e-05		647.391	4.7997
Q4/2002	2002-12-31	1802.9	378.904	442.996	661.731	384.661	380.192	61997	249.732				Q4/2002	164.79	661.731	661.731	482.972	#N/A	9.15894	Q4/2002	9.1587	9.15894	-0.000235411		661.731	7.6072
Q1/2003	2003-03-31	1777.88	390.4	442.16	678.437	383.614	383.617	62542	247.164				Q1/2003	168.96	678.437	678.437	495.193	#N/A	10.4873	Q1/2003	10.4872	10.4873	-5.36305e-05		678.437	13.7748
Q2/2003	2003-06-30	1805.93	385.056	439.912	672.223	375.844	384.307	60430	252.36				Q2/2003	167.41	672.223	672.223	490.651	#N/A	-3.61369	Q2/2003	-3.6135	-3.61369	0.000186394		672.223	-6.2438
Q3/2003	2003-09-30	1829.11	386.428	441.488	677.768	370.652	384.692	61846	254.84				Q3/2003	168.79	677.768	677.768	494.695	#N/A	3.34055	Q3/2003	3.3403	3.34055	-0.000250416		677.768	1.7759
Q4/2003	2003-12-31	1894.6	398.588	451.372	699.181	378.068	402.897	63126	262.652				Q4/2003	174.12	699.181	699.181	510.317	#N/A	13.249	Q4/2003	13.2491	13.249	0.00013783		699.181	10.2146
Q1/2004	2004-03-31	1952.75	401.36	455.068	710.822	387.476	406.41	64993	270.672				Q1/2004	177.03	710.822	710.822	518.845	#N/A	6.82797	Q1/2004	6.8279	6.82797	-6.88781e-05		710.822	9.0171
Q2/2004	2004-06-30	2033.04	412.732	465.512	725.447	390.942	417.56	66066	278.632				Q2/2004	180.67	725.447	725.447	529.513	#N/A	8.4874	Q2/2004	8.4878	8.4874	0.000396987		725.447	10.499
Q3/2004	2004-09-30	2053.57	422.16	472.616	740.742	394.301	429.342	67541	280.788				Q3/2004	184.48	740.742	740.742	540.68	#N/A	8.7039	Q3/2004	8.7037	8.7039	-0.000199316		740.742	9.5836
Q4/2004	2004-12-31	2102	431.284	483.544	743.227	399.096	434.103	69478	289.416				Q4/2004	185.1	743.227	743.227	542.497	#N/A	1.34867	Q4/2004	1.3489	1.34867	0.000234581		743.227	5.4526
Q1/2005	2005-03-31	2126.8	426.976	486.876	730.393	400.858	448.795	69174	288.092				Q1/2005	181.88	730.393	730.393	533.06	#N/A	-6.73032	Q1/2005	-6.7306	-6.73032	-0.000281962		730.393	-9.2244
Q2/2005	2005-06-30	2151.18	444.248	491.172	765	406.476	445.49	70379	304.752				Q2/2005	190.5	765	765	558.324	#N/A	20.3426	Q2/2005	20.343	20.3426	0.000416306		765	19.539
Q3/2005	2005-09-30	2156.89	450.488	500.08	783.834	406.788	453.078	72426	301.388				Q3/2005	195.19	783.834	783.834	572.069	#N/A	10.2175	Q3/2005	10.2172	10.2175	-0.000323955		783.834	12.6874
Q4/2005	2005-12-31	2222	460.932	519.324	817.007	415.66	463.479	72451	303.952				Q4/2005	203.45	817.007	817.007	596.278	#N/A	18.0339	Q4/2005	18.0342	18.0339	0.000310303		817.007	16.9788
Q1/2006	2006-03-31	2269.94	506.308	522.808	837.727	431.475	467.729	73750	316.048				Q1/2006	208.62	837.727	837.727	611.43	#N/A	10.5368	Q1/2006	10.5366	10.5368	-0.000213792		837.727	11.3104
Q2/2006	2006-06-30	2297.61	527.188	528.476	851.015	434.924	480.263	74730	322.572				Q2/2006	211.93	851.015	851.015	621.131	#N/A	6.49735	Q2/2006	6.4975	6.49735	0.000148324		851.015	7.6794
Q3/2006	2006-09-30	2315.23	465.572	524.872	866.693	439.653	479.334	74680	320.44				Q3/2006	215.83	866.693	866.693	632.562	#N/A	7.57523	Q3/2006	7.5753	7.57523	6.69617e-05		866.693	8.921
Q4/2006	2006-12-31	2321.39	469.084	539.928	896.807	457.177	479.576	74658	336.948				Q4/2006	223.33	896.807	896.807	654.543	#N/A	14.6396	Q4/2006	14.6393	14.6396	-0.000336995		896.807	14.8272
Q1/2007	2007-03-31	2358.68	481.412	545.104	906.558	460.837	489.886	75371	345.912				Q1/2007	225.76	906.558	906.558	661.665	#N/A	4.42066	Q1/2007	4.4207	4.42066	4.30955e-05		906.558	0.7916
Q2/2007	2007-06-30	2369.38	477.012	559.448	910.477	459.705	497.808	76470	350.64				Q2/2007	226.74	910.477	910.477	664.537	#N/A	1.74042	Q2/2007	1.7407	1.74042	0.000277105		910.477	-0.7513
Q3/2007	2007-09-30	2368.71	495.208	565.864	928.737	465.114	509.752	75828	353.012				Q3/2007	231.28	928.737	928.737	677.843	#N/A	8.26674	Q3/2007	8.2664	8.26674	-0.000343413		928.737	8.7123
Q4/2007	2007-12-31	2339.27	489.6	567.208	931.318	461.564	519.122	76656	357.424				Q4/2007	231.93	931.318	931.318	679.748	#N/A	1.11626	Q4/2007	1.1163	1.11626	4.03864e-05		931.318	4.5797
Q1/2008	2008-03-31	2361.63	489.108	573.764	943.076	462.152	520.723	77867	352.66				Q1/2008	234.85	943.076	943.076	688.306	#N/A	5.14649	Q1/2008	5.1468	5.14649	0.000308993		943.076	7.8298
Q2/2008	2008-06-30	2340.4	489.32	568.996	932.56	455.938	524.6	75576	346.884				Q2/2008	232.24	932.56	932.56	680.657	#N/A	-4.38625	Q2/2008	-4.3862	-4.38625	4.75785e-05		932.56	-4.834
Q3/2008	2008-09-30	2293.04	476.264	566.884	949.003	438.972	510.121	75888	329.192				Q3/2008	236.33	949.003	949.003	692.644	#N/A	7.24158	Q3/2008	7.2415	7.24158	-8.08883e-05		949.003	8.408
Q4/2008	2008-12-31	2199.51	456.084	549.832	918.508	418.274	478.438	77114	299.192				Q4/2008	228.74	918.508	918.508	670.399	#N/A	-12.2471	Q4/2008	-12.2474	-12.2471	-0.000290727		918.508	-12.9422
Q1/2009	2009-03-31	1986.67	429.456	515.272	863.634	389.597	432.413	64773	258.656				Q1/2009	215.07	863.634	863.634	630.334	#N/A	-21.8395	Q1/2009	-21.8393	-21.8395	0.000231652		863.634	-15.5197
Q2/2009	2009-06-30	1905.71	424.924	504.112	820.137	376.086	425.815	61866	264.108				Q2/2009	204.24	820.137	820.137	598.593	#N/A	-18.6745	Q2/2009	-18.6746	-18.6745	-9.11839e-05		820.137	-18.717
Q3/2009	2009-09-30	1976.98	427.872	502.744	851.398	385.284	452.544	65271	281.004				Q3/2009	212.02	851.398	851.398	621.395	#N/A	16.1408	Q3/2009	16.1406	16.1408	-0.000218259		851.398	16.5807
Q4/2009	2009-12-31	2063.35	442.996	527.956	847.191	397.821	469.906	66575	280.952				Q4/2009	210.98	847.191	847.191	618.347	#N/A	-1.96191	Q4/2009	-1.9616	-1.96191	0.000312344		847.191	-0.4243
Q1/2010	2010-03-31	2116.94	448.252	529.076	901.227	416.296	491.074	68431	284.204				Q1/2010	224.43	901.227	901.227	657.767	#N/A	28.0594	Q1/2010	28.0592	28.0594	-0.000194347		901.227	28.8011
Q2/2010	2010-06-30	2217.77	464.544	552.252	964.992	427.267	504.862	71867	291.768				Q2/2010	240.31	964.992	964.992	704.308	#N/A	31.4492	Q2/2010	31.4495	31.4492	0.000261519		964.992	24.5049
Q3/2010	2010-09-30	2295.95	476.44	569.352	964.61	436.16	514.118	73369	288.688				Q3/2010	240.21	964.61	964.61	704.015	#N/A	-0.158249	Q3/2010	-0.1584	-0.158249	-0.000150716		964.61	0.9485
Q4/2010	2010-12-31	2310.74	483.488	572.664	978.663	456.374	515.903	73699	295.152				Q4/2010	243.71	978.663	978.663	714.273	#N/A	5.95602	Q4/2010	5.9561	5.95602	7.96605e-05		978.663	7.6926
Q1/2011	2011-03-31	2328.48	465.996	596.72	1002.71	449.81	527.716	74758	296.928				Q1/2011	249.71	1002.71	1002.71	731.858	#N/A	10.195	Q1/2011	10.1948	10.195	-0.00017156		1002.71	10.1116
Q2/2011	2011-06-30	2345.93	466.612	591.568	1027.66	443.906	532.631	74344	288.016				Q2/2011	255.92	1027.66	1027.66	750.059	#N/A	10.3312	Q2/2011	10.331	10.3312	-0.00018548		1027.66	6.4133
Q3/2011	2011-09-30	2364.92	475.76	593.04	1029.19	438.047	536.681	76826	286.6				Q3/2011	256.3	1029.19	1029.19	751.172	#N/A	0.59647	Q3/2011	0.5967	0.59647	0.000230255		1029.19	6.3742
Q4/2011	2011-12-31	2391.35	480.692	588.964	1022.21	424.162	541.863	78117	278.944				Q4/2011	254.57	1022.21	1022.21	746.102	#N/A	-2.68459	Q4/2011	-2.6848	-2.68459	-0.0002113		1022.21	0.8495
Q1/2012	2012-03-31	2405.29	477.736	595.196	1021.73	412.409	552.103	79428	275.08				Q1/2012	254.45	1021.73	1021.73	745.75	#N/A	-0.186915	Q1/2012	-0.1869	-0.186915	1.49232e-05		1021.73	0.584
Q2/2012	2012-06-30	2417.04	489.584	598.032	1025.17	404.927	551.382	81226	268.668				Q2/2012	255.3	1025.17	1025.17	748.242	#N/A	1.35395	Q2/2012	1.3541	1.35395	0.00015246		1025.17	2.8819
Q3/2012	2012-09-30	2420.85	488.168	600.092	1028.42	402.629	557.594	80937	269.908				Q3/2012	256.11	1028.42	1028.42	750.615	#N/A	1.27412	Q3/2012	1.2742	1.27412	7.6004e-05		1028.42	0.2313
Q4/2012	2012-12-31	2397.78	485.236	597.22	1021.35	392.324	554.686	78901	263.736				Q4/2012	254.35	1021.35	1021.35	745.457	#N/A	-2.72314	Q4/2012	-2.7232	-2.72314	-5.59586e-05		1021.35	-3.4199
Q1/2013	2013-03-31	2405.49	477.768	596.516	1034.37	391.95	561.856	79219	262.58				Q1/2013	257.59	1034.37	1034.37	754.953	#N/A	5.19952	Q1/2013	5.1996	5.19952	8.12357e-05		1034.37	-2.1449
Q2/2013	2013-06-30	2436.57	503.772	609.088	1050.43	388.899	562.23	82020	267.544				Q2/2013	261.59	1050.43	1050.43	766.676	#N/A	6.35708	Q2/2013	6.3569	6.35708	-0.00017971		1050.43	7.9576
Q3/2013	2013-09-30	2447.06	504.38	614.404	1068.4	396.39	562.924	83611	269.376				Q3/2013	266.07	1068.4	1068.4	779.807	#N/A	7.0213	Q3/2013	7.0215	7.0213	0.000200642		1068.4	3.3742
Q4/2013	2013-12-31	2456.62	515.88	622.608	1070.32	397.582	565.311	86134	272.4				Q4/2013	266.54	1070.32	1070.32	781.184	#N/A	0.717757	Q4/2013	0.7178	0.717757	4.27257e-05		1070.32	2.5598
Q1/2014	2014-03-31	2486.76	513.176	628.016	1073.16	397.602	560.112	91280	280.312				Q1/2014	267.26	1073.16	1073.16	783.294	#N/A	1.06748	Q1/2014	1.0673	1.06748	-0.000183192		1073.16	5.4
Q2/2014	2014-06-30	2547.96	513.404	635.396	1088.46	404.952	576.974	87892	284.224				Q2/2014	271.06	1088.46	1088.46	794.431	#N/A	5.82395	Q2/2014	5.8241	5.82395	0.000151436		1088.46	5.5
Q3/2014	2014-09-30	2541.77	522.272	644.212	1095.53	408.925	580.073	89207	288.764				Q3/2014	272.83	1095.53	1095.53	799.619	#N/A	2.6251	Q3/2014	2.6252	2.6251	0.000103623		1095.53	5.7
Q4/2014	2014-12-31	2607.72	542.332	652.78	1115.22	410.889	586.142	89969	289.252				Q4/2014	277.73	1115.22	1115.22	813.98	#N/A	7.38651	Q4/2014	7.3864	7.38651	-0.000113701		1115.22	5.8
Q1/2015	2015-03-31	2650.52	549.396	664.36	1137.79	425.868	585.228	90761	297.928				Q1/2015	283.35	1137.79	1137.79	830.451	#N/A	8.34127	Q1/2015	8.3412	8.34127	-6.8086e-05		1137.79	6
Q2/2015	2015-06-30	2671.99	540.976	665.9	1141.99	432.61	583.909	88763	299.904				Q2/2015	284.4	1141.99	1141.99	833.529	#N/A	1.48688	Q2/2015	1.487	1.48688	0.00011944		1141.99	6.1
Q3/2015	2015-09-30	2683.43	545.212	677.212	1155.09	430.94	575.638	91095	306.564				Q3/2015	287.66	1155.09	1155.09	843.083	#N/A	4.66694	Q3/2015	4.6668	4.66694	-0.000144458		1155.09	6.2
Q4/2015	2015-12-31	2683.45	562.54	694.948	1163.02	440.758	575.323	90423	306.096				Q4/2015	289.63	1163.02	1163.02	848.857	#N/A	2.77593	Q4/2015	2.7761	2.77593	0.000168525		1163.02	6.2
Q1/2016	2016-03-31	2682.3	563.84	699.116	1182.84	437.458	575.588	89205	308.544				Q1/2016	294.56	1182.84	1182.84	863.306	#N/A	6.99043	Q1/2016	6.9904	6.99043	-2.73036e-05		1182.84
Q2/2016	2016-06-30	2684.91	569.556	691.352	1181.02	446.413	574.075	88382	314.336				Q2/2016	294.11	1181.02	1181.02	861.987	#N/A	-0.612704	Q2/2016	-0.6128	-0.612704	-9.55709e-05		1181.02
Q3/2016	2016-09-30	2702.57	588.356	709.708	1189.72	450.795	580.576	88442	309.14				Q3/2016	296.28	1189.72	1189.72	868.347	#N/A	2.97932	Q3/2016	2.9792	2.97932	-0.000124985		1189.72
Q4/2016	2016-12-31	2755.46	582.584	716.132	1219.64	461.301	566.97	89167	310.98				Q4/2016	303.73	1219.64	1219.64	890.182	#N/A	10.4461	Q4/2016	10.4462	10.4461	8.69895e-05		1219.64
Q1/2017	2017-03-31	2784.51	587.896	726.732	1224.66	462.055	585.747	90579	322.504				Q1/2017	305.37	1224.66	1224.66	894.988	#N/A	1.65658	Q1/2017	1.6567	1.65658	0.000122635		1224.66
Q2/2017	2017-06-30	2794.78	591.46	724.864	1254.39	471.179	594.627	92162	323.964				Q2/2017	312.7	1254.39	1254.39	916.471	#N/A	10.0698	Q2/2017	10.0698	10.0698	1.12356e-05		1254.39
Q3/2017	2017-09-30	2789.97	598.52	739.232	1268.64	480.22	595.104	90944	327.236				Q3/2017	315.96	1268.64	1268.64	926.026	#N/A	4.62007	Q3/2017	4.62	4.62007	-7.38714e-05		1268.64
Q4/2017	2017-12-31	2883.7	600.628	742.16	1293.87	485.218	604.304	93732	327.26				Q4/2017	321.75	1293.87	1293.87	942.995	#N/A	8.19781	Q4/2017	8.1978	8.19781	-1.14892e-05		1293.87
Q1/2018	2018-03-31	2902.17	597.152	741.796	1290.63	492.011	607.898	94009	332.823				Q1/2018	318.23	1290.63	1290.63	932.679	#N/A	-1.00004	Q1/2018	-1	-1.00004	3.56509e-05		1290.63
Q2/2018	2018-06-30	2943.37	599.66	748.828	1306.46	498.049	613.444	94591	337.15				Q2/2018		1306.46	1306.46	0	#N/A	4.99972	Q2/2018	5	4.99972	0.000278024		1306.46
Q3/2018	2018-09-30	2982.32	602.059	756.097	1322.81	504.025	620.232	95246	340.807				Q3/2018		1322.81	1322.81	0	#N/A	5.10032	Q3/2018	5.1	5.10032	-0.000317687		1322.81
Q4/2018	2018-12-31	3021.79	604.467	763.088	1339.68	509.57	626.795	95766	344.413				Q4/2018		1339.68	1339.68	0	#N/A	5.19998	Q4/2018	5.2	5.19998	1.81101e-05		1339.68
Q1/2019	2019-03-31	3061.79	606.764	770.516	1356.77	514.591	632.666	96297	347.807				Q1/2019		1356.77	1356.77	0	#N/A	5.19993	Q1/2019	5.2	5.19993	7.10622e-05		1356.77
Q2/2019	2019-06-30	3102.31	609.009	778.039	1374.07	519.536	638.36	96846	351.234				Q2/2019		1374.07	1374.07	0	#N/A	5.19996	Q2/2019	5.2	5.19996	4.36959e-05		1374.07
Q3/2019	2019-09-30	3140.38	611.201	785.636	1390.94	524.529	644.105	97871	354.61				Q3/2019		1390.94	1390.94	0	#N/A	5.00001	Q3/2019	5	5.00001	-1.26064e-05		1390.94
Q4/2019	2019-12-31	3177.41	613.402	793.306	1407.63	529.57	649.902	97303	357.931				Q4/2019		1407.63	1407.63	0	#N/A	4.88702	Q4/2019	4.8871	4.88702	7.94514e-05		1407.63

## Sheet: EXP
Q1/1960 !Q mag=bil	.excel_last	Q111xc@OUTLOOK	Q112xc@OUTLOOK	Q132xc@OUTLOOK		Q136xc@OUTLOOK	Q156xc@OUTLOOK	Q158xc@OUTLOOK	Q184xc@OUTLOOK			GERMANY	Q1/1960 !Q mag=bil	S134NXC@G10	Q134XC@OUTLOOK					Q1/1960 !Q	Q134XCP@OUTLOOK					(Q134XCP@OUTLOOK) - historical
.DESC		US: Exports of Goods & Services, Vol, Natl Accounts Basis(SAAR,Bil.Chn.2009.US$)	UK: Exports of Goods & Serv, Vol, Natl Accounts Basis(SAAR,Bil.Chn.2015.Pound)	France: Exports of Goods & Serv, Vol, Natl Acc Basis(SAAR,Bil.Chn.2010.Euro)	Germany: Exports of Goods&Services, Volume, Natl Accounts Basis(Bil.Ch.2005.EUR)	Italy: Exports of Goods & Serv, Vol, Natl Accounts Basis(SAAR,Bil.Chn.2010.Euro)	Canada: Exports of Goods & Serv, Vol, Natl Accounts Basis(SAAR,Bil.Chn.2007.C$)	Japan: Exports of Goods & Serv, Vol, Natl Accounts Basis(SAAR,Bil.Chn.2011.Yen)	Spain: Exports of Goods & Serv, Vol, Natl Accounts Basis(SAAR,Bil.Chn.2010.Euro)				.DESC	Germany: GDP: Exports of Goods & Services (SWDA, Bil.Chn.2010.Euros)	Germany: Exports of Goods & Serv, Vol, Natl Acc Basis(SAAR,Bil.Chn.2010.Euro)	Germany: Exports of Goods&Services, Volume, Natl Accounts Basis(Bil.Ch.2010.EUR)	Comparison			.DESC	Germany: Exports of Goods & Services Growth, Volume (Annualized % Change)	Comparison				Germany:Exports of Goods&Services Growth,Vol(Period/Period Annualized % Change)
.T1		Q1-1960	Q1-1960	Q1-1960	Q1-1968	Q1-1960	Q1-1961	Q1-1960	Q1-1960				.T1	Q1-1970	Q1-1991					.T1	Q2-1991					Q2-1968
.TN		Q4-2019	Q4-2019	Q4-2019	Q4-2019	Q4-2019	Q4-2019	Q4-2019	Q4-2019				.TN	Q1-2018	Q4-2019					.TN	Q4-2019					Q4-2015
.LSOURCE		Organization for Economic Cooperation & Development	Organization for Economic Cooperation & Development	Organization for Economic Cooperation & Development	Organization for Economic Cooperation & Devt	Organization for Economic Cooperation & Development	Organization for Economic Cooperation & Development	Organization for Economic Cooperation & Development	Organization for Economic Cooperation & Development				.LSOURCE	Deutsche Bundesbank	Organization for Economic Cooperation & Development					.LSOURCE	Organization for Economic Cooperation & Development				Historical Germany Series	Organization for Economic Cooperation & Devt
.DTLM		May-30-2018 07:53	May-30-2018 07:53	May-30-2018 07:53		May-30-2018 07:53	May-30-2018 07:53	May-30-2018 07:53	May-30-2018 07:53				.DTLM	May-24-2018 01:06	May-30-2018 07:53					.DTLM	May-30-2018 07:53					May-09-2014 15:38
Q1/1960	1960-03-31	101.064	52.416	29.824	#N/A	24.011	#N/A	1531	7.354				Q1/1960	#N/A	#N/A	#N/A				Q1/1960	#N/A				#N/A	#N/A
Q2/1960	1960-06-30	107.484	51.36	30.064	#N/A	24.771	#N/A	1600	8.2352				Q2/1960	#N/A	#N/A	#N/A				Q2/1960	#N/A				#N/A	#N/A
Q3/1960	1960-09-30	104.769	52.052	31.064	#N/A	24.132	#N/A	1637	8.7522				Q3/1960	#N/A	#N/A	#N/A				Q3/1960	#N/A				#N/A	#N/A
Q4/1960	1960-12-31	106.94	52.744	31.088	#N/A	24.558	#N/A	1682	8.9345				Q4/1960	#N/A	#N/A	#N/A				Q4/1960	#N/A				#N/A	#N/A
Q1/1961	1961-03-31	106.207	54.648	31.448	#N/A	25.652	41.788	1661	8.7821				Q1/1961	#N/A	#N/A	#N/A				Q1/1961	#N/A				#N/A	#N/A
Q2/1961	1961-06-30	104.732	53.18	32.208	#N/A	27.263	41.325	1678	8.8044				Q2/1961	#N/A	#N/A	#N/A				Q2/1961	#N/A				#N/A	#N/A
Q3/1961	1961-09-30	104.163	53.624	32.344	#N/A	28.965	42.62	1695	9.0013				Q3/1961	#N/A	#N/A	#N/A				Q3/1961	#N/A				#N/A	#N/A
Q4/1961	1961-12-31	107.384	53.74	32.1	#N/A	31.244	43.523	1756	9.3368				Q4/1961	#N/A	#N/A	#N/A				Q4/1961	#N/A				#N/A	#N/A
Q1/1962	1962-03-31	107.121	53.616	32.452	#N/A	31.518	43.938	1889	9.8109				Q1/1962	#N/A	#N/A	#N/A				Q1/1962	#N/A				#N/A	#N/A
Q2/1962	1962-06-30	117.4	55.22	32.34	#N/A	30.849	44.09	1969	10.1303				Q2/1962	#N/A	#N/A	#N/A				Q2/1962	#N/A				#N/A	#N/A
Q3/1962	1962-09-30	110.834	54.86	32.208	#N/A	31.457	43.374	2056	10.2951				Q3/1962	#N/A	#N/A	#N/A				Q3/1962	#N/A				#N/A	#N/A
Q4/1962	1962-12-31	108.444	55.144	32.82	#N/A	32.004	45.7	2041	10.2713				Q4/1962	#N/A	#N/A	#N/A				Q4/1962	#N/A				#N/A	#N/A
Q1/1963	1963-03-31	110.981	56.34	33.272	#N/A	31.487	46.093	2010	10.0591				Q1/1963	#N/A	#N/A	#N/A				Q1/1963	#N/A				#N/A	#N/A
Q2/1963	1963-06-30	123.968	57.1	34.86	#N/A	33.676	47.133	2074	10.1545				Q2/1963	#N/A	#N/A	#N/A				Q2/1963	#N/A				#N/A	#N/A
Q3/1963	1963-09-30	117.348	57.576	36.08	#N/A	34.892	47.457	2173	10.5577				Q3/1963	#N/A	#N/A	#N/A				Q3/1963	#N/A				#N/A	#N/A
Q4/1963	1963-12-31	123.237	58.528	36.072	#N/A	34.922	52.016	2252	11.2919				Q4/1963	#N/A	#N/A	#N/A				Q4/1963	#N/A				#N/A	#N/A
Q1/1964	1964-03-31	130.79	59	37.692	#N/A	35.195	52.866	2329	12.3571				Q1/1964	#N/A	#N/A	#N/A				Q1/1964	#N/A				#N/A	#N/A
Q2/1964	1964-06-30	132.953	59.66	37.3	#N/A	37.779	56.289	2512	13.1173				Q2/1964	#N/A	#N/A	#N/A				Q2/1964	#N/A				#N/A	#N/A
Q3/1964	1964-09-30	131.936	58.288	37.696	#N/A	38.448	55.441	2599	13.5723				Q3/1964	#N/A	#N/A	#N/A				Q3/1964	#N/A				#N/A	#N/A
Q4/1964	1964-12-31	135.866	60.168	39.348	#N/A	40.332	54.273	2911	13.7347				Q4/1964	#N/A	#N/A	#N/A				Q4/1964	#N/A				#N/A	#N/A
Q1/1965	1965-03-31	121.201	60.356	40.368	#N/A	42.855	54.724	3139	13.6045				Q1/1965	#N/A	#N/A	#N/A				Q1/1965	#N/A				#N/A	#N/A
Q2/1965	1965-06-30	143.954	61.428	41.44	#N/A	45.164	55.478	3218	13.7429				Q2/1965	#N/A	#N/A	#N/A				Q2/1965	#N/A				#N/A	#N/A
Q3/1965	1965-09-30	135.71	61.924	42.616	#N/A	46.289	57.687	3270	14.15				Q3/1965	#N/A	#N/A	#N/A				Q3/1965	#N/A				#N/A	#N/A
Q4/1965	1965-12-31	145.548	63.76	43.824	#N/A	48.295	60.834	3189	14.8521				Q4/1965	#N/A	#N/A	#N/A				Q4/1965	#N/A				#N/A	#N/A
Q1/1966	1966-03-31	142.979	63.904	43.976	#N/A	48.66	61.805	3626	15.8492				Q1/1966	#N/A	#N/A	#N/A				Q1/1966	#N/A				#N/A	#N/A
Q2/1966	1966-06-30	149.242	62.88	44.528	#N/A	50.24	62.909	3639	16.4215				Q2/1966	#N/A	#N/A	#N/A				Q2/1966	#N/A				#N/A	#N/A
Q3/1966	1966-09-30	143.616	65.376	45.796	#N/A	51.061	66.736	3796	16.5688				Q3/1966	#N/A	#N/A	#N/A				Q3/1966	#N/A				#N/A	#N/A
Q4/1966	1966-12-31	148.349	68.136	45.22	#N/A	53.067	67.305	3927	16.2507				Q4/1966	#N/A	#N/A	#N/A				Q4/1966	#N/A				#N/A	#N/A
Q1/1967	1967-03-31	151.162	68.128	46.732	#N/A	54.191	68.479	3897	15.4672				Q1/1967	#N/A	#N/A	#N/A				Q1/1967	#N/A				#N/A	#N/A
Q2/1967	1967-06-30	149.82	65.768	47.76	#N/A	54.982	72.835	3959	15.1816				Q2/1967	#N/A	#N/A	#N/A				Q2/1967	#N/A				#N/A	#N/A
Q3/1967	1967-09-30	146.197	66.164	48.464	#N/A	54.282	72.506	4052	15.394				Q3/1967	#N/A	#N/A	#N/A				Q3/1967	#N/A				#N/A	#N/A
Q4/1967	1967-12-31	150.365	61.656	50.248	#N/A	57.17	72.709	4094	16.0425				Q4/1967	#N/A	#N/A	#N/A				Q4/1967	#N/A				#N/A	#N/A
Q1/1968	1968-03-31	154.745	72.1	53.272	110.315	59.936	76.514	4482	17.1271				Q1/1968	#N/A	#N/A	#N/A				Q1/1968	#N/A				110.315	#N/A
Q2/1968	1968-06-30	157.814	70.94	45.64	105.749	62.002	79.244	4914	18.0555				Q2/1968	#N/A	#N/A	#N/A			#N/A	Q2/1968	#N/A				105.749	-15.5575
Q3/1968	1968-09-30	167.125	75.332	57.836	111.538	64.282	81.303	5049	18.8274				Q3/1968	#N/A	#N/A	#N/A			#N/A	Q3/1968	#N/A				111.538	23.7637
Q4/1968	1968-12-31	165.017	76.224	56.588	118.58	68.871	84.694	5375	19.5052				Q4/1968	#N/A	#N/A	#N/A			#N/A	Q4/1968	#N/A				118.58	27.7471
Q1/1969	1969-03-31	145.249	76.34	58.712	117.775	72.822	85.656	5595	20.0888				Q1/1969	#N/A	#N/A	#N/A			#N/A	Q1/1969	#N/A				117.775	-2.687
Q2/1969	1969-06-30	177.816	80.396	60.428	122.982	74.828	84.769	5903	20.7975				Q2/1969	#N/A	#N/A	#N/A			#N/A	Q2/1969	#N/A				122.982	18.8902
Q3/1969	1969-09-30	173.552	83.112	62.484	124.009	69.965	85.889	6166	21.6313				Q3/1969	#N/A	#N/A	#N/A			#N/A	Q3/1969	#N/A				124.009	3.3821
Q4/1969	1969-12-31	179.527	83.572	65.552	122.846	68.78	91.146	6284	22.585				Q4/1969	#N/A	#N/A	#N/A			#N/A	Q4/1969	#N/A				122.846	-3.6978
Q1/1970	1970-03-31	180.929	84.512	68.668	128.112	74.942	94.51	6669	23.8374				Q1/1970	#N/A	#N/A	#N/A	#N/A	#N/A	#N/A	Q1/1970	#N/A				128.112	18.2814
Q2/1970	1970-06-30	188.882	83.296	71.2	129.277	77.134	94.478	6923	24.5377				Q2/1970	#N/A	#N/A	#N/A	#N/A	#N/A	#N/A	Q2/1970	#N/A				129.277	3.6875
Q3/1970	1970-09-30	188.317	82.424	72.82	131.527	76.543	95.387	7108	25.5544				Q3/1970	#N/A	#N/A	#N/A	#N/A	#N/A	#N/A	Q3/1970	#N/A				131.527	7.1448
Q4/1970	1970-12-31	190.055	90.38	74.72	132.29	74.858	94.956	7448	26.4772				Q4/1970	#N/A	#N/A	#N/A	#N/A	#N/A	#N/A	Q4/1970	#N/A				132.29	2.3415
Q1/1971	1971-03-31	190.769	86.452	76.148	132.813	78.846	96.724	7853	27.0349				Q1/1971	#N/A	#N/A	#N/A	#N/A	#N/A	#N/A	Q1/1971	#N/A				132.813	1.5886
Q2/1971	1971-06-30	190.434	92.6	77.416	132.772	78.07	98.165	8267	28.131				Q2/1971	#N/A	#N/A	#N/A	#N/A	#N/A	#N/A	Q2/1971	#N/A				132.772	-0.1209
Q3/1971	1971-09-30	198.323	93.184	80.796	137.111	82.293	103.042	8428	29.2641				Q3/1971	#N/A	#N/A	#N/A	#N/A	#N/A	#N/A	Q3/1971	#N/A				137.111	13.7258
Q4/1971	1971-12-31	181.711	92.772	80.732	128.474	87.266	99.86	8103	30.2356				Q4/1971	#N/A	#N/A	#N/A	#N/A	#N/A	#N/A	Q4/1971	#N/A				128.474	-22.9152
Q1/1972	1972-03-31	201.408	91.536	83.784	134.812	89.882	101.098	8132	30.8651				Q1/1972	#N/A	#N/A	#N/A	#N/A	#N/A	#N/A	Q1/1972	#N/A				134.812	21.2413
Q2/1972	1972-06-30	195.548	92.048	87.604	138.708	86.615	109.259	7976	31.7838				Q2/1972	#N/A	#N/A	#N/A	#N/A	#N/A	#N/A	Q2/1972	#N/A				138.708	12.0723
Q3/1972	1972-09-30	207.357	84.792	87.604	142.243	88.87	106.05	8668	33.0956				Q3/1972	#N/A	#N/A	#N/A	#N/A	#N/A	#N/A	Q3/1972	#N/A				142.243	10.5905
Q4/1972	1972-12-31	216.149	101.38	91.848	149.032	87.694	115.743	9219	34.2864				Q4/1972	#N/A	#N/A	#N/A	#N/A	#N/A	#N/A	Q4/1972	#N/A				149.032	20.5014
Q1/1973	1973-03-31	231.989	100.864	94.908	150.409	83.902	120.46	8906	35.1573				Q1/1973	#N/A	#N/A	#N/A	#N/A	#N/A	#N/A	Q1/1973	#N/A				150.409	3.7459
Q2/1973	1973-06-30	243.177	103.064	97.408	156.033	95.657	121.444	8696	35.7809				Q2/1973	#N/A	#N/A	#N/A	#N/A	#N/A	#N/A	Q2/1973	#N/A				156.033	15.8173
Q3/1973	1973-09-30	243.989	105.724	99.192	159.809	99.626	115.329	8894	36.2164				Q3/1973	#N/A	#N/A	#N/A	#N/A	#N/A	#N/A	Q3/1973	#N/A				159.809	10.0379
Q4/1973	1973-12-31	255.965	106.516	103.328	162.219	95.667	118.513	9281	35.8766				Q4/1973	#N/A	#N/A	#N/A	#N/A	#N/A	#N/A	Q4/1973	#N/A				162.219	6.1711
Q1/1974	1974-03-31	259.237	109.5	108.112	178.379	101.069	114.642	9828	35.2629				Q1/1974	#N/A	#N/A	#N/A	#N/A	#N/A	#N/A	Q1/1974	#N/A				178.379	46.2061
Q2/1974	1974-06-30	271.846	113.032	109.216	176.089	98.173	113.404	10871	35.1596				Q2/1974	#N/A	#N/A	#N/A	#N/A	#N/A	#N/A	Q2/1974	#N/A				176.089	-5.0371
Q3/1974	1974-09-30	257.187	113.792	111.36	177.455	105.244	115.27	11399	35.5269				Q3/1974	#N/A	#N/A	#N/A	#N/A	#N/A	#N/A	Q3/1974	#N/A				177.455	3.1392
Q4/1974	1974-12-31	263.908	111.412	111.392	171.951	98.857	110.965	11958	35.6559				Q4/1974	#N/A	#N/A	#N/A	#N/A	#N/A	#N/A	Q4/1974	#N/A				171.951	-11.8413
Q1/1975	1975-03-31	265.769	110.936	107.272	164.871	98.767	103.481	10782	35.3071				Q1/1975	#N/A	#N/A	#N/A	#N/A	#N/A	#N/A	Q1/1975	#N/A				164.871	-15.4808
Q2/1975	1975-06-30	258.034	106.52	105.156	163.063	98.884	104.719	10669	35.1176				Q2/1975	#N/A	#N/A	#N/A	#N/A	#N/A	#N/A	Q2/1975	#N/A				163.063	-4.3143
Q3/1975	1975-09-30	253.687	106.372	105.788	163.826	103.591	104.368	10796	35.1632				Q3/1975	#N/A	#N/A	#N/A	#N/A	#N/A	#N/A	Q3/1975	#N/A				163.826	1.8855
Q4/1975	1975-12-31	268.031	111.752	107.564	168.567	108.083	104.026	11388	35.4529				Q4/1975	#N/A	#N/A	#N/A	#N/A	#N/A	#N/A	Q4/1975	#N/A				168.567	12.0864
Q1/1976	1976-03-31	266.175	114.236	110.572	175.326	111.139	107.275	12104	35.7119				Q1/1976	#N/A	#N/A	#N/A	#N/A	#N/A	#N/A	Q1/1976	#N/A				175.326	17.0292
Q2/1976	1976-06-30	268.856	118.568	114.86	177.214	113.469	113.371	12542	36.423				Q2/1976	#N/A	#N/A	#N/A	#N/A	#N/A	#N/A	Q2/1976	#N/A				177.214	4.3781
Q3/1976	1976-09-30	276.668	119.352	116.292	183.401	116.998	116.008	12824	37.4424				Q3/1976	#N/A	#N/A	#N/A	#N/A	#N/A	#N/A	Q3/1976	#N/A				183.401	14.7136
Q4/1976	1976-12-31	279.479	123.524	120.236	183.12	119.346	112.302	13410	38.5028				Q4/1976	#N/A	#N/A	#N/A	#N/A	#N/A	#N/A	Q4/1976	#N/A				183.12	-0.6119
Q1/1977	1977-03-31	274.989	124.024	121.324	183.341	118.376	116.954	13957	39.6273				Q1/1977	#N/A	#N/A	#N/A	#N/A	#N/A	#N/A	Q1/1977	#N/A				183.341	0.4836
Q2/1977	1977-06-30	282.402	126.72	122.984	187.639	129.148	119.257	14227	40.9743				Q2/1977	#N/A	#N/A	#N/A	#N/A	#N/A	#N/A	Q2/1977	#N/A				187.639	9.7127
Q3/1977	1977-09-30	284.589	131.26	126.284	187.96	126.32	119.96	14485	42.0875				Q3/1977	#N/A	#N/A	#N/A	#N/A	#N/A	#N/A	Q3/1977	#N/A				187.96	0.6869
Q4/1977	1977-12-31	275.456	126.144	128.496	190.813	135.444	121.586	14179	43.3099				Q4/1977	#N/A	#N/A	#N/A	#N/A	#N/A	#N/A	Q4/1977	#N/A				190.813	6.2092
Q1/1978	1978-03-31	281.945	127.46	130.216	189.859	131.962	126.663	14859	44.7228				Q1/1978	#N/A	#N/A	#N/A	#N/A	#N/A	#N/A	Q1/1978	#N/A				189.859	-1.9848
Q2/1978	1978-06-30	311.328	129.828	131.64	188.895	138.898	130.666	14251	45.8527				Q2/1978	#N/A	#N/A	#N/A	#N/A	#N/A	#N/A	Q2/1978	#N/A				188.895	-2.0158
Q3/1978	1978-09-30	314.742	130.144	134.248	196.527	146.391	132.712	13855	46.3558				Q3/1978	#N/A	#N/A	#N/A	#N/A	#N/A	#N/A	Q3/1978	#N/A				196.527	17.1697
Q4/1978	1978-12-31	327.238	129.956	135.864	198.215	143.609	135.332	13740	46.8423				Q4/1978	#N/A	#N/A	#N/A	#N/A	#N/A	#N/A	Q4/1978	#N/A				198.215	3.4787
Q1/1979	1979-03-31	327.507	120.072	139.032	197.602	152.555	138.455	14017	47.5417				Q1/1979	#N/A	#N/A	#N/A	#N/A	#N/A	#N/A	Q1/1979	#N/A				197.602	-1.2299
Q2/1979	1979-06-30	328.37	142	139.3	201.419	143.94	132.886	14364	48.4085				Q2/1979	#N/A	#N/A	#N/A	#N/A	#N/A	#N/A	Q2/1979	#N/A				201.419	7.9519
Q3/1979	1979-09-30	340.193	136.808	144.416	208.931	151.83	137.52	14880	48.9726				Q3/1979	#N/A	#N/A	#N/A	#N/A	#N/A	#N/A	Q3/1979	#N/A				208.931	15.7738
Q4/1979	1979-12-31	361.599	137.86	145.028	208.489	154.295	136.324	15884	49.1395				Q4/1979	#N/A	#N/A	#N/A	#N/A	#N/A	#N/A	Q4/1979	#N/A				208.489	-0.8434
Q1/1980	1980-03-31	371.687	140.04	147.928	222.53	150.615	140.263	16914	49.0626				Q1/1980	#N/A	#N/A	#N/A	#N/A	#N/A	#N/A	Q1/1980	#N/A				222.53	29.7845
Q2/1980	1980-06-30	378.697	134.268	146.192	215.459	136.304	134.396	17154	50.2733				Q2/1980	#N/A	#N/A	#N/A	#N/A	#N/A	#N/A	Q2/1980	#N/A				215.459	-12.1169
Q3/1980	1980-09-30	377.896	130.812	142.936	210.277	129.935	135.188	16985	47.8791				Q3/1980	#N/A	#N/A	#N/A	#N/A	#N/A	#N/A	Q3/1980	#N/A				210.277	-9.2798
Q4/1980	1980-12-31	375.62	130.024	145.16	209.995	133.743	141.169	18137	51.3102				Q4/1980	#N/A	#N/A	#N/A	#N/A	#N/A	#N/A	Q4/1980	#N/A				209.995	-0.5338
Q1/1981	1981-03-31	382.708	129.116	147.248	217.418	138.562	138.533	18671	50.2353				Q1/1981	#N/A	#N/A	#N/A	#N/A	#N/A	#N/A	Q1/1981	#N/A				217.418	14.9052
Q2/1981	1981-06-30	384.795	130.712	152.828	225.733	146.157	142.372	19573	53.9813				Q2/1981	#N/A	#N/A	#N/A	#N/A	#N/A	#N/A	Q2/1981	#N/A				225.733	16.1996
Q3/1981	1981-09-30	376.614	136.664	156.4	235.897	149.579	138.977	20123	59.2801				Q3/1981	#N/A	#N/A	#N/A	#N/A	#N/A	#N/A	Q3/1981	#N/A				235.897	19.2636
Q4/1981	1981-12-31	378.359	136.008	154.088	240.919	146.416	139.995	20040	57.4288				Q4/1981	#N/A	#N/A	#N/A	#N/A	#N/A	#N/A	Q4/1981	#N/A				240.919	8.7908
Q1/1982	1982-03-31	361.953	133.216	151.908	242.154	147.55	136.993	20043	58.8621				Q1/1982	#N/A	#N/A	#N/A	#N/A	#N/A	#N/A	Q1/1982	#N/A				242.154	2.0666
Q2/1982	1982-06-30	364.127	136.124	150.004	239.262	144.161	139.524	19847	54.8989				Q2/1982	#N/A	#N/A	#N/A	#N/A	#N/A	#N/A	Q2/1982	#N/A				239.262	-4.6928
Q3/1982	1982-09-30	347.991	133.368	148.296	234.281	139.491	143.764	19878	58.9652				Q3/1982	#N/A	#N/A	#N/A	#N/A	#N/A	#N/A	Q3/1982	#N/A				234.281	-8.0712
Q4/1982	1982-12-31	332.056	135.716	153.436	234.843	140.344	131.683	19762	60.5125				Q4/1982	#N/A	#N/A	#N/A	#N/A	#N/A	#N/A	Q4/1982	#N/A				234.843	0.9637
Q1/1983	1983-03-31	337.422	135.524	152.88	233.447	146.627	135.392	19995	61.4246				Q1/1983	#N/A	#N/A	#N/A	#N/A	#N/A	#N/A	Q1/1983	#N/A				233.447	-2.3569
Q2/1983	1983-06-30	338.441	135.404	156.808	234.29	147.696	144.591	20296	63.9546				Q2/1983	#N/A	#N/A	#N/A	#N/A	#N/A	#N/A	Q2/1983	#N/A				234.29	1.4534
Q3/1983	1983-09-30	343.538	138.068	159.88	235.897	149.317	146.556	21156	64.4432				Q3/1983	#N/A	#N/A	#N/A	#N/A	#N/A	#N/A	Q3/1983	#N/A				235.897	2.7718
Q4/1983	1983-12-31	350.46	140.256	163.448	240.517	152.795	157.22	22036	65.8384				Q4/1983	#N/A	#N/A	#N/A	#N/A	#N/A	#N/A	Q4/1983	#N/A				240.517	8.0669
Q1/1984	1984-03-31	357.784	143.784	165.308	251.515	157.034	164.956	23055	72.3751				Q1/1984	#N/A	#N/A	#N/A	#N/A	#N/A	#N/A	Q1/1984	#N/A				251.515	19.5833
Q2/1984	1984-06-30	366.678	143.492	168.956	244.846	156.844	170.269	23784	72.6845				Q2/1984	#N/A	#N/A	#N/A	#N/A	#N/A	#N/A	Q2/1984	#N/A				244.846	-10.191
Q3/1984	1984-09-30	374.772	147.912	170.652	263.526	162.504	179.948	24380	73.0591				Q3/1984	#N/A	#N/A	#N/A	#N/A	#N/A	#N/A	Q3/1984	#N/A				263.526	34.1901
Q4/1984	1984-12-31	382.381	151.088	171.524	275.738	164.126	177.354	25054	68.3141				Q4/1984	#N/A	#N/A	#N/A	#N/A	#N/A	#N/A	Q4/1984	#N/A				275.738	19.8654
Q1/1985	1985-03-31	383.37	152.808	171.004	279.445	164.288	178.651	24932	70.8061				Q1/1985	#N/A	#N/A	#N/A	#N/A	#N/A	#N/A	Q1/1985	#N/A				279.445	5.4864
Q2/1985	1985-06-30	382.542	158.692	174.676	278.24	165.945	180.174	25849	69.7094				Q2/1985	#N/A	#N/A	#N/A	#N/A	#N/A	#N/A	Q2/1985	#N/A				278.24	-1.7139
Q3/1985	1985-09-30	376.977	154.088	171.22	282.739	166.454	181.051	25302	72.2013				Q3/1985	#N/A	#N/A	#N/A	#N/A	#N/A	#N/A	Q3/1985	#N/A				282.739	6.627
Q4/1985	1985-12-31	388.259	155	173.888	278.361	168.357	183.552	25249	75.6325				Q4/1985	#N/A	#N/A	#N/A	#N/A	#N/A	#N/A	Q4/1985	#N/A				278.361	-6.0525
Q1/1986	1986-03-31	400.476	158.644	171.488	279.496	172.001	184.671	23942	69.8017				Q1/1986	#N/A	#N/A	#N/A	#N/A	#N/A	#N/A	Q1/1986	#N/A				279.496	1.641
Q2/1986	1986-06-30	404.815	161.04	170.044	275.036	170.492	186.386	24445	73.4392				Q2/1986	#N/A	#N/A	#N/A	#N/A	#N/A	#N/A	Q2/1986	#N/A				275.036	-6.2309
Q3/1986	1986-09-30	414.077	161.168	172.044	275.478	172.118	192.672	23894	71.4793				Q3/1986	#N/A	#N/A	#N/A	#N/A	#N/A	#N/A	Q3/1986	#N/A				275.478	0.6442
Q4/1986	1986-12-31	429.511	165.568	169.964	273.027	164.387	192.15	23862	74.2915				Q4/1986	#N/A	#N/A	#N/A	#N/A	#N/A	#N/A	Q4/1986	#N/A				273.027	-3.5111
Q1/1987	1987-03-31	429.824	170.264	169.148	268.166	171.883	193.962	23725	74.525				Q1/1987	#N/A	#N/A	#N/A	#N/A	#N/A	#N/A	Q1/1987	#N/A				268.166	-6.934
Q2/1987	1987-06-30	447.48	168.672	172.716	277.768	163.481	191.271	23785	75.6868				Q2/1987	#N/A	#N/A	#N/A	#N/A	#N/A	#N/A	Q2/1987	#N/A				277.768	15.1099
Q3/1987	1987-09-30	466.872	174.9	178.128	278.813	185.858	194.27	24130	77.9182				Q3/1987	#N/A	#N/A	#N/A	#N/A	#N/A	#N/A	Q3/1987	#N/A				278.813	1.5127
Q4/1987	1987-12-31	484.281	174.268	182.884	282.147	179.472	200.4	24405	76.1103				Q4/1987	#N/A	#N/A	#N/A	#N/A	#N/A	#N/A	Q4/1987	#N/A				282.147	4.8704
Q1/1988	1988-03-31	511.191	171.612	185.02	266.661	172.99	211.276	24546	78.6999				Q1/1988	#N/A	#N/A	#N/A	#N/A	#N/A	#N/A	Q1/1988	#N/A				266.661	-20.2124
Q2/1988	1988-06-30	525.527	175.2	188.152	291.527	187.33	214.771	24935	78.6185				Q2/1988	#N/A	#N/A	#N/A	#N/A	#N/A	#N/A	Q2/1988	#N/A				291.527	42.8497
Q3/1988	1988-09-30	535.887	176.26	192.924	297.151	186.815	209.708	26394	80.0789				Q3/1988	#N/A	#N/A	#N/A	#N/A	#N/A	#N/A	Q3/1988	#N/A				297.151	7.9429
Q4/1988	1988-12-31	552.24	172.632	196.528	306.672	192.17	215.122	26599	78.4502				Q4/1988	#N/A	#N/A	#N/A	#N/A	#N/A	#N/A	Q4/1988	#N/A				306.672	13.4452
Q1/1989	1989-03-31	568.722	181.144	205.008	317.359	192.599	218.888	27353	79.7315				Q1/1989	#N/A	#N/A	#N/A	#N/A	#N/A	#N/A	Q1/1989	#N/A				317.359	14.6847
Q2/1989	1989-06-30	593.614	178.192	209.264	321.979	203.713	210.377	28026	80.7738				Q2/1989	#N/A	#N/A	#N/A	#N/A	#N/A	#N/A	Q2/1989	#N/A				321.979	5.9512
Q3/1989	1989-09-30	599.672	182.788	209.02	327.402	203.386	211.558	28403	79.4003				Q3/1989	#N/A	#N/A	#N/A	#N/A	#N/A	#N/A	Q3/1989	#N/A				327.402	6.9095
Q4/1989	1989-12-31	608.748	187.948	214.944	319.97	206.342	217.086	28402	80.4535				Q4/1989	#N/A	#N/A	#N/A	#N/A	#N/A	#N/A	Q4/1989	#N/A				319.97	-8.7753
Q1/1990	1990-03-31	635.186	192.668	219.76	343.33	206.066	220.361	29366	80.383				Q1/1990	#N/A	#N/A	#N/A	#N/A	#N/A	#N/A	Q1/1990	#N/A				343.33	32.5595
Q2/1990	1990-06-30	643.087	192.388	215.34	332.604	216.455	228.377	30058	83.3852				Q2/1990	#N/A	#N/A	#N/A	#N/A	#N/A	#N/A	Q2/1990	#N/A				332.604	-11.9235
Q3/1990	1990-09-30	647.955	192.088	217.432	375.55	215.546	227.03	29857	85.7089				Q3/1990	#N/A	#N/A	#N/A	#N/A	#N/A	#N/A	Q3/1990	#N/A				375.55	62.5411
Q4/1990	1990-12-31	653.66	193.612	221.9	394.994	219.592	220.969	30961	85.9206				Q4/1990	#N/A	#N/A	#N/A	#N/A	#N/A	#N/A	Q4/1990	#N/A				394.994	22.375
Q1/1991	1991-03-31	657.653	187.028	222.644	412.924	209.392	216.347	30980	89.6938				Q1/1991	102.66	412.924	412.924	#N/A	#N/A	#N/A	Q1/1991	#N/A				412.924	19.4308
Q2/1991	1991-06-30	681.631	193.228	228.628	389.269	208.354	225.901	31108	90.8285				Q2/1991	96.78	389.269	389.269	#N/A	#N/A	-21.0197	Q2/1991	-21.0196	-21.0197	0.000100755		389.269	-22.5706
Q3/1991	1991-09-30	697.767	196.168	235.312	407.801	206.318	234.526	31849	89.4495				Q3/1991	101.39	407.801	407.801	#N/A	#N/A	20.4464	Q3/1991	20.4458	20.4464	-0.000612191		407.801	16.1174
Q4/1991	1991-12-31	713.479	195.524	240.132	408.782	215.219	234.136	32602	93.1033				Q4/1991	101.63	408.782	408.782	#N/A	#N/A	0.965712	Q4/1991	0.9658	0.965712	8.82938e-05		408.782	2.4971
Q1/1992	1992-03-31	726.377	198.124	246.012	412.625	220.483	236.056	32744	98.0546				Q1/1992	102.58	412.625	412.625	#N/A	#N/A	3.8138	Q1/1992	3.8143	3.8138	0.000498923		412.625	4.2382
Q2/1992	1992-06-30	726.729	202.94	246.144	393.657	222.635	242.772	32880	97.2565				Q2/1992	97.86	393.657	393.657	#N/A	#N/A	-17.1582	Q2/1992	-17.1588	-17.1582	-0.000645351		393.657	-17.2676
Q3/1992	1992-09-30	742.144	199.056	244.784	405.212	222.633	246.48	33013	97.0014				Q3/1992	100.74	405.212	405.212	#N/A	#N/A	12.2683	Q3/1992	12.2691	12.2683	0.000765826		405.212	8.6519
Q4/1992	1992-12-31	745.886	206.812	242.516	387.225	230.229	253.233	33444	98.0057				Q4/1992	96.26	387.225	387.225	#N/A	#N/A	-16.608	Q4/1992	-16.6085	-16.608	-0.000494534		387.225	-16.3032
Q1/1993	1993-03-31	747.581	209.856	246.012	378.587	235.776	262.466	33802	101.893				Q1/1993	94.12	378.587	378.587	#N/A	#N/A	-8.62882	Q1/1993	-8.6289	-8.62882	-8.01298e-05		378.587	-8.9447
Q2/1993	1993-06-30	756.541	207.056	241.432	371.065	238.773	269.982	33136	101.947				Q2/1993	92.25	371.065	371.065	#N/A	#N/A	-7.71371	Q2/1993	-7.7133	-7.71371	0.000411297		371.065	-4.7839
Q3/1993	1993-09-30	754.526	210.544	244.48	372.7	245.457	272.048	33154	104.184				Q3/1993	92.66	372.7	372.7	#N/A	#N/A	1.77418	Q3/1993	1.7743	1.77418	0.000122352		372.7	2.243
Q4/1993	1993-12-31	778.859	216.248	253.424	380.113	254.57	280.001	32469	112.892				Q4/1993	94.5	380.113	380.113	#N/A	#N/A	8.19653	Q4/1993	8.196	8.19653	-0.000526985		380.113	7.3093
Q1/1994	1994-03-31	786.511	224.916	252.408	391.122	258.021	281.808	33937	121.183				Q1/1994	97.24	391.122	391.122	#N/A	#N/A	12.0981	Q1/1994	12.099	12.0981	0.000942085		391.122	13.1477
Q2/1994	1994-06-30	813.069	225.82	262.736	410.199	261.72	301.892	34120	118.642				Q2/1994	101.98	410.199	410.199	#N/A	#N/A	20.9844	Q2/1994	20.9838	20.9844	-0.000609487		410.199	19.9361
Q3/1994	1994-09-30	843.501	232.284	268.348	408.891	272.69	313.766	34744	121.297				Q3/1994	101.66	408.891	408.891	#N/A	#N/A	-1.26939	Q3/1994	-1.2695	-1.26939	-0.000109224		408.891	-1.1333
Q4/1994	1994-12-31	862.969	238.48	281.412	411.18	282.101	326.271	34904	129.961				Q4/1994	102.23	411.18	411.18	#N/A	#N/A	2.2581	Q4/1994	2.2583	2.2581	0.000199133		411.18	3.3783
Q1/1995	1995-03-31	879.584	249.408	285.896	426.659	300.675	335.303	35328	133.54				Q1/1995	106.07	426.659	426.659	#N/A	#N/A	15.93	Q1/1995	15.9302	15.93	0.000232073		426.659	13.9077
Q2/1995	1995-06-30	891.915	246.296	292.256	430.911	312.313	328.018	35878	134.104				Q2/1995	107.13	430.911	430.911	#N/A	#N/A	4.04631	Q2/1995	4.0456	4.04631	-0.000708877		430.911	6.2078
Q3/1995	1995-09-30	930.517	254.74	288.92	434.29	302.455	328.266	36202	132.168				Q3/1995	107.97	434.29	434.29	#N/A	#N/A	3.1737	Q3/1995	3.1739	3.1737	0.000202455		434.29	1.2511
Q4/1995	1995-12-31	943.813	258.18	291.556	441.048	298.278	340.702	36114	137.428				Q4/1995	109.65	441.048	441.048	#N/A	#N/A	6.37121	Q4/1995	6.3717	6.37121	0.000487258		441.048	6.9614
Q1/1996	1996-03-31	955.193	264.224	296.692	447.235	306.155	340.881	36690	142.704				Q1/1996	111.2	447.235	447.235	#N/A	#N/A	5.73036	Q1/1996	5.7304	5.73036	4.1242e-05		447.235	8.5201
Q2/1996	1996-06-30	970.735	268.356	295.936	448.761	305.352	354.067	36677	144.276				Q2/1996	111.58	448.761	448.761	#N/A	#N/A	1.37183	Q2/1996	1.3719	1.37183	6.81673e-05		448.761	1.2016
Q3/1996	1996-09-30	978.594	271.852	301.004	460.425	304.276	361.695	37719	150.124				Q3/1996	114.48	460.425	460.425	#N/A	#N/A	10.809	Q3/1996	10.8083	10.809	-0.000731394		460.425	9.4616
Q4/1996	1996-12-31	1039.61	278.66	311.284	481.244	308.251	351.972	39337	153.52				Q4/1996	119.65	481.244	481.244	#N/A	#N/A	19.3509	Q4/1996	19.3513	19.3509	0.000392788		481.244	20.3583
Q1/1997	1997-03-31	1059.37	279.852	321.432	489.91	311.247	371.71	40560	155.236				Q1/1997	121.79	489.91	489.91	#N/A	#N/A	7.39991	Q1/1997	7.3999	7.39991	-7.0998e-06		489.91	5.0452
Q2/1997	1997-06-30	1101.72	292.172	336.092	504.518	321.039	376.439	42279	167.396				Q2/1997	125.42	504.518	504.518	#N/A	#N/A	12.4712	Q2/1997	12.4712	12.4712	-2.99449e-05		504.518	13.5385
Q3/1997	1997-09-30	1127.24	290.524	346.596	531.663	326.442	387.293	41631	177.348				Q3/1997	132.17	531.663	531.663	#N/A	#N/A	23.3216	Q3/1997	23.3211	23.3216	-0.00048229		531.663	17.9216
Q4/1997	1997-12-31	1125.67	306.1	356.732	539.512	329.787	394.28	42578	176.852				Q4/1997	134.12	539.512	539.512	#N/A	#N/A	6.03731	Q4/1997	6.0373	6.03731	-5.9543e-06		539.512	9.5946
Q1/1998	1998-03-31	1130.94	302.388	363.44	551.365	337.232	407.109	41478	179.952				Q1/1998	137.08	551.365	551.365	#N/A	#N/A	9.08181	Q1/1998	9.0822	9.08181	0.000388595		551.365	5.9564
Q2/1998	1998-06-30	1118.45	302.008	367.928	560.086	335.546	411.659	40680	183.096				Q2/1998	139.25	560.086	560.086	#N/A	#N/A	6.47854	Q2/1998	6.4783	6.47854	-0.000241046		560.086	9.0899
Q3/1998	1998-09-30	1113.26	299.68	373.552	554.635	327.303	419.985	40753	184.12				Q3/1998	137.89	554.635	554.635	#N/A	#N/A	-3.83651	Q3/1998	-3.8361	-3.83651	0.000409263		554.635	-4.2342
Q4/1998	1998-12-31	1154.47	302.792	372.356	546.351	319.618	436.533	40046	184.048				Q4/1998	135.83	546.351	546.351	#N/A	#N/A	-5.84186	Q4/1998	-5.8423	-5.84186	-0.000442191		546.351	-3.2703
Q1/1999	1999-03-31	1126.44	299.248	371.42	549.512	317.583	452.532	40154	191.48				Q1/1999	136.62	549.512	549.512	#N/A	#N/A	2.33443	Q1/1999	2.3346	2.33443	0.000174943		549.512	-2.7538
Q2/1999	1999-06-30	1137.91	306.644	379.236	577.963	318.204	453.215	40541	194.096				Q2/1999	143.69	577.963	577.963	#N/A	#N/A	22.3746	Q2/1999	22.3748	22.3746	0.000161041		577.963	28.3796
Q3/1999	1999-09-30	1171.34	317.984	394.472	591.371	326.547	469.05	42220	199.064				Q3/1999	147.02	591.371	591.371	#N/A	#N/A	9.60742	Q3/1999	9.6074	9.60742	-1.80302e-05		591.371	9.7523
Q4/1999	1999-12-31	1200.89	321.664	402.672	604.234	340.32	481.969	43216	205.108				Q4/1999	150.22	604.234	604.234	#N/A	#N/A	8.98847	Q4/1999	8.9885	8.98847	3.33182e-05		604.234	11.3457
Q1/2000	2000-03-31	1219.16	329.752	416.816	633.422	356.09	498.519	45440	211.636				Q1/2000	157.48	633.422	633.422	#N/A	#N/A	20.768	Q1/2000	20.7682	20.768	0.000182792		633.422	13.9933
Q2/2000	2000-06-30	1254.75	339.464	432.72	655.986	358.146	506.008	46869	216.084				Q2/2000	163.09	655.986	655.986	#N/A	#N/A	15.0286	Q2/2000	15.0284	15.0286	-0.000167235		655.986	13.7719
Q3/2000	2000-09-30	1285.52	339.876	444.012	667.759	374.66	509.868	47614	219.02				Q3/2000	166.02	667.759	667.759	#N/A	#N/A	7.37439	Q3/2000	7.374	7.37439	-0.000391901		667.759	8.5999
Q4/2000	2000-12-31	1274.31	356.42	457.304	702.858	381.214	510.505	47374	225.8				Q4/2000	174.75	702.858	702.858	#N/A	#N/A	22.7415	Q4/2000	22.7417	22.7415	0.000216211		702.858	27.7472
Q1/2001	2001-03-31	1254.5	360.664	459.852	702.342	379.746	500.981	45652	231.064				Q1/2001	174.61	702.342	702.342	#N/A	#N/A	-0.293335	Q1/2001	-0.2935	-0.293335	-0.000165045		702.342	-2.7185
Q2/2001	2001-06-30	1213.04	352.324	449.32	704.631	384.032	494.104	43947	225.092				Q2/2001	175.18	704.631	704.631	#N/A	#N/A	1.31003	Q2/2001	1.3101	1.31003	7.47194e-05		704.631	2.2726
Q3/2001	2001-09-30	1154.07	339.792	451.028	703.868	372.276	483.825	42961	224.652				Q3/2001	174.99	703.868	703.868	#N/A	#N/A	-0.432431	Q3/2001	-0.4325	-0.432431	-6.8507e-05		703.868	-1.8209
Q4/2001	2001-12-31	1117.99	341.432	442.128	711.389	368.481	485.492	42173	223.8				Q4/2001	176.86	711.389	711.389	#N/A	#N/A	4.34309	Q4/2001	4.3434	4.34309	0.000309217		711.389	11.6846
Q1/2002	2002-03-31	1140.86	349.756	449.136	710.491	366.116	493.923	44078	223.568				Q1/2002	176.65	710.491	710.491	#N/A	#N/A	-0.503972	Q1/2002	-0.5042	-0.503972	-0.000227582		710.491	-3.7776
Q2/2002	2002-06-30	1172.1	362.12	459.932	731.638	364.744	492.734	47302	229.752				Q2/2002	181.9	731.638	731.638	#N/A	#N/A	12.4477	Q2/2002	12.4476	12.4477	-0.000129745		731.638	11.3586
Q3/2002	2002-09-30	1180.45	359.584	463.42	744.173	365.064	504.138	47634	227.908				Q3/2002	185.02	744.173	744.173	#N/A	#N/A	7.03126	Q3/2002	7.0316	7.03126	0.000344397		744.173	5.0837
Q4/2002	2002-12-31	1164.47	347.676	461.632	756.273	371.47	496.911	49286	235.748				Q4/2002	188.03	756.273	756.273	#N/A	#N/A	6.66422	Q4/2002	6.6639	6.66422	-0.000316406		756.273	8.9329
Q1/2003	2003-03-31	1157.56	368.96	451.5	735.589	364.435	488.837	49930	235.1				Q1/2003	182.88	735.589	735.589	#N/A	#N/A	-10.4993	Q1/2003	-10.4991	-10.4993	0.000181523		735.589	-6.7169
Q2/2003	2003-06-30	1156.23	358.148	448.252	732.537	352.812	479.125	50054	237.564				Q2/2003	182.12	732.537	732.537	#N/A	#N/A	-1.64932	Q2/2003	-1.6495	-1.64932	-0.000177834		732.537	-3.7946
Q3/2003	2003-09-30	1187.03	359.724	453.012	754.666	360.303	484.895	51837	235.176				Q3/2003	187.62	754.666	754.666	#N/A	#N/A	12.6421	Q3/2003	12.6419	12.6421	-0.000235267		754.666	12.9784
Q4/2003	2003-12-31	1239.24	368.616	463.548	772.761	367.312	500.343	54399	240.488				Q4/2003	192.12	772.761	772.761	#N/A	#N/A	9.9415	Q4/2003	9.9417	9.9415	0.000202865		772.761	7.6572
Q1/2004	2004-03-31	1276.62	375.416	466.416	805.817	371.677	499.76	57054	245.188				Q1/2004	200.33	805.817	805.817	#N/A	#N/A	18.2401	Q1/2004	18.2402	18.2401	6.47372e-05		805.817	14.5554
Q2/2004	2004-06-30	1293.08	380.54	473.064	840.374	382.554	523.496	58900	246.888				Q2/2004	208.92	840.374	840.374	#N/A	#N/A	18.2891	Q2/2004	18.289	18.2891	-0.000100346		840.374	21.6956
Q3/2004	2004-09-30	1300.55	377.564	475.46	826.312	386.382	521.705	59451	246.984				Q3/2004	205.43	826.312	826.312	#N/A	#N/A	-6.52708	Q3/2004	-6.5274	-6.52708	-0.000319872		826.312	-6.3979
Q4/2004	2004-12-31	1332.07	392.34	486.468	832.852	382.794	516.422	60251	249.592				Q4/2004	207.05	832.852	832.852	#N/A	#N/A	3.20366	Q4/2004	3.204	3.20366	0.000341546		832.852	4.534
Q1/2005	2005-03-31	1352.65	390.068	481.724	851.928	385.73	521.526	59661	245.948				Q1/2005	211.8	851.928	851.928	#N/A	#N/A	9.48137	Q1/2005	9.4811	9.48137	-0.000273482		851.928	8.8305
Q2/2005	2005-06-30	1377.64	411.404	484.812	865.554	394.844	519.331	62253	255.096				Q2/2005	215.18	865.554	865.554	#N/A	#N/A	6.55286	Q2/2005	6.5531	6.55286	0.000242292		865.554	11.5789
Q3/2005	2005-09-30	1379.21	420.044	496.884	900.874	399.891	527.038	64199	252.244				Q3/2005	223.96	900.874	900.874	#N/A	#N/A	17.349	Q3/2005	17.349	17.349	-3.99794e-05		900.874	15.6466
Q4/2005	2005-12-31	1418.13	437.324	508.068	917.444	407.907	539.264	66436	252.876				Q4/2005	228.08	917.444	917.444	#N/A	#N/A	7.56279	Q4/2005	7.5627	7.56279	-8.71646e-05		917.444	6.9792
Q1/2006	2006-03-31	1470.96	482.456	519.748	946.739	420.685	531.898	67917	259.536				Q1/2006	235.37	946.739	946.739	#N/A	#N/A	13.3973	Q1/2006	13.3973	13.3973	-2.56281e-05		946.739	14.7192
Q2/2006	2006-06-30	1498.5	505.468	525.976	975.19	427.95	530.089	69117	263.676				Q2/2006	242.45	975.19	975.19	#N/A	#N/A	12.5734	Q2/2006	12.5736	12.5734	0.000173455		975.19	14.3933
Q3/2006	2006-09-30	1495.52	436.188	517.232	1004.3	427.074	529.746	70396	261.136				Q3/2006	249.68	1004.3	1004.3	#N/A	#N/A	12.4834	Q3/2006	12.4835	12.4834	0.000149185		1004.3	11.2094
Q4/2006	2006-12-31	1562.1	440.844	525.504	1062.18	449.175	533.668	71168	271.468				Q4/2006	264.07	1062.18	1062.18	#N/A	#N/A	25.1254	Q4/2006	25.1252	25.1254	-0.000246846		1062.18	29.4994
Q1/2007	2007-03-31	1587.67	444.036	527.476	1060.87	449.896	539.123	72918	282.7				Q1/2007	263.75	1060.87	1060.87	#N/A	#N/A	-0.491663	Q1/2007	-0.4917	-0.491663	-3.67623e-05		1060.87	-6.717
Q2/2007	2007-06-30	1615.65	458.42	539.8	1087.14	453.462	547.545	74681	283.74				Q2/2007	270.28	1087.14	1087.14	#N/A	#N/A	10.2795	Q2/2007	10.2795	10.2795	4.44336e-07		1087.14	7.236
Q3/2007	2007-09-30	1665.56	462.26	540.828	1108.94	460.834	537.992	76523	288.224				Q3/2007	275.7	1108.94	1108.94	#N/A	#N/A	8.26593	Q3/2007	8.2662	8.26593	0.000273181		1108.94	7.5247
Q4/2007	2007-12-31	1716.69	473.016	540.524	1116.46	455.668	524.984	78637	288.304				Q4/2007	277.57	1116.46	1116.46	#N/A	#N/A	2.74095	Q4/2007	2.7408	2.74095	-0.000145085		1116.46	9.1735
Q1/2008	2008-03-31	1737.94	462.66	554.992	1131.35	463.803	517.605	80501	288.352				Q1/2008	281.26	1131.35	1131.35	#N/A	#N/A	5.43901	Q1/2008	5.4389	5.43901	-0.00011278		1131.35	5.1749
Q2/2008	2008-06-30	1790.02	472	544.16	1127.75	452.334	522.022	78935	291.412				Q2/2008	280.36	1127.75	1127.75	#N/A	#N/A	-1.26606	Q2/2008	-1.2659	-1.26606	0.000157378		1127.75	-1.6479
Q3/2008	2008-09-30	1766.12	465.292	537.948	1118.26	436.984	517.941	79018	290.04				Q3/2008	278	1118.26	1118.26	#N/A	#N/A	-3.32168	Q3/2008	-3.3217	-3.32168	-2.41597e-05		1118.26	-1.7478
Q4/2008	2008-12-31	1669.23	448.436	510.796	1052.75	406.678	494.149	69022	263.484				Q4/2008	261.72	1052.75	1052.75	#N/A	#N/A	-21.455	Q4/2008	-21.4551	-21.455	-0.000123507		1052.75	-21.4375
Q1/2009	2009-03-31	1535.34	421.452	475.652	930.795	360.014	451.484	51518	245.676				Q1/2009	231.39	930.795	930.795	#N/A	#N/A	-38.8889	Q1/2009	-38.889	-38.8889	-0.000102215		930.795	-35.8991
Q2/2009	2009-06-30	1539.37	414.12	473.376	924.145	352.222	433.203	56215	248.984				Q2/2009	229.74	924.145	924.145	#N/A	#N/A	-2.82729	Q2/2009	-2.8273	-2.82729	-8.00265e-06		924.145	-2.3758
Q3/2009	2009-09-30	1593.34	418.232	477.796	957.395	362.006	444.796	61691	257.292				Q3/2009	238	957.395	957.395	#N/A	#N/A	15.1872	Q3/2009	15.1874	15.1872	0.00021959		957.395	14.0635
Q4/2009	2009-12-31	1682.9	434.012	482.316	986.176	370.09	455.661	66020	256.408				Q4/2009	245.16	986.176	986.176	#N/A	#N/A	12.5779	Q4/2009	12.5778	12.5779	-8.7875e-05		986.176	15.4026
Q1/2010	2010-03-31	1708.16	431.472	498.824	1013.81	383.248	461.762	69944	264.696				Q1/2010	252.04	1013.81	1013.81	#N/A	#N/A	11.6863	Q1/2010	11.6862	11.6863	-0.000124416		1013.81	16.0588
Q2/2010	2010-06-30	1748.07	445.66	515.752	1086.3	398.517	476.786	73295	271.988				Q2/2010	270.06	1086.3	1086.3	#N/A	#N/A	31.8186	Q2/2010	31.8188	31.8186	0.000227132		1086.3	26.8924
Q3/2010	2010-09-30	1797.51	445.456	524.848	1104.83	409.213	476.764	75299	278.128				Q3/2010	274.67	1104.83	1104.83	#N/A	#N/A	7.00053	Q3/2010	7.0005	7.00053	-3.28438e-05		1104.83	5.5739
Q4/2010	2010-12-31	1852.64	465.32	535.972	1131.54	417.339	488.462	75557	288.58				Q4/2010	281.31	1131.54	1131.54	#N/A	#N/A	10.0259	Q4/2010	10.0258	10.0259	-6.12668e-05		1131.54	12.9687
Q1/2011	2011-03-31	1862.3	477.748	547.408	1156.36	423.333	489.029	74820	297.844				Q1/2011	287.49	1156.36	1156.36	#N/A	#N/A	9.06872	Q1/2011	9.0689	9.06872	0.000181994		1156.36	10.3332
Q2/2011	2011-06-30	1890.68	473.756	553.848	1173.48	427.218	481.695	69269	293.1				Q2/2011	291.74	1173.48	1173.48	#N/A	#N/A	6.05303	Q2/2011	6.0528	6.05303	-0.000230042		1173.48	-0.0894
Q3/2011	2011-09-30	1910.6	469.14	556.924	1186.23	428.002	508.648	75659	296.444				Q3/2011	294.91	1186.23	1186.23	#N/A	#N/A	4.41846	Q3/2011	4.4188	4.41846	0.000339632		1186.23	7.6677
Q4/2011	2011-12-31	1929.67	478.72	565.232	1186.45	427.539	515.001	73623	297.72				Q4/2011	294.97	1186.45	1186.45	#N/A	#N/A	0.0738679	Q4/2011	0.0735	0.0738679	-0.000367852		1186.45	1.2354
Q1/2012	2012-03-31	1942.6	484.66	567.7	1206.42	430.108	514.018	75734	296.864				Q1/2012	299.93	1206.42	1206.42	#N/A	#N/A	6.90637	Q1/2012	6.9066	6.90637	0.00023218		1206.42	6.9535
Q2/2012	2012-06-30	1964.35	464.98	572.172	1217	433.882	513.642	75050	294.408				Q2/2012	302.56	1217	1217	#N/A	#N/A	3.55226	Q2/2012	3.5523	3.55226	3.91962e-05		1217	5.8952
Q3/2012	2012-09-30	1974.05	480.16	573.5	1231.17	441.742	509.771	72361	302.16				Q3/2012	306.08	1231.17	1231.17	#N/A	#N/A	4.74002	Q3/2012	4.7398	4.74002	-0.000216943		1231.17	1.9954
Q4/2012	2012-12-31	1971.74	473.888	570.652	1211.44	435.212	509.639	69966	304.292				Q4/2012	301.18	1211.44	1211.44	#N/A	#N/A	-6.25802	Q4/2012	-6.258	-6.25802	2.36394e-05		1211.44	-6.3469
Q1/2013	2013-03-31	1991.13	476.572	569.804	1218.17	437.391	518.298	71968	307.352				Q1/2013	302.86	1218.17	1218.17	#N/A	#N/A	2.24107	Q1/2013	2.2412	2.24107	0.000127596		1218.17	-3.9612
Q2/2013	2013-06-30	2015.47	490.74	583.92	1225.47	435.146	527.121	74556	314.72				Q2/2013	304.67	1225.47	1225.47	#N/A	#N/A	2.42001	Q2/2013	2.4198	2.42001	-0.000208317		1225.47	10.1052
Q3/2013	2013-09-30	2030.96	478.876	582.396	1243.24	443.189	525.309	74507	312.476				Q3/2013	309.09	1243.24	1243.24	#N/A	#N/A	5.92691	Q3/2013	5.9271	5.92691	0.000194061		1243.24	0.9063
Q4/2013	2013-12-31	2088.55	473.488	590.764	1271.04	441.288	531.206	74311	314.484				Q4/2013	316	1271.04	1271.04	#N/A	#N/A	9.24783	Q4/2013	9.2479	9.24783	7.16955e-05		1271.04	11.0165
Q1/2014	2014-03-31	2075.76	476.932	596.072	1270.99	444.001	527.456	78628	318.424				Q1/2014	316	1270.99	1270.99	#N/A	#N/A	-0.0166782	Q1/2014	-0.0168	-0.0166782	-0.000121775		1270.99	3.4
Q2/2014	2014-06-30	2121.8	495.272	595.976	1277.96	446.234	561.986	79737	321.948				Q2/2014	317.73	1277.96	1277.96	#N/A	#N/A	2.2136	Q2/2014	2.2137	2.2136	9.77422e-05		1277.96	3.7
Q3/2014	2014-09-30	2125.11	488.584	601.292	1304.78	450.835	568.676	80961	329.808				Q3/2014	324.4	1304.78	1304.78	#N/A	#N/A	8.66093	Q3/2014	8.6609	8.66093	-2.77904e-05		1304.78	3.9
Q4/2014	2014-12-31	2150.8	509.852	612.368	1328.65	457.547	568.319	83456	332.424				Q4/2014	330.34	1328.65	1328.65	#N/A	#N/A	7.52164	Q4/2014	7.5216	7.52164	-4.24247e-05		1328.65	4.4
Q1/2015	2015-03-31	2126.38	509.8	619.632	1338.16	465.064	565.173	84342	334.468				Q1/2015	332.69	1338.16	1338.16	#N/A	#N/A	2.89456	Q1/2015	2.8948	2.89456	0.000240135		1338.16	4.8
Q2/2015	2015-06-30	2145.78	519.952	626.16	1361.38	471.237	575.168	81537	336.204				Q2/2015	338.47	1361.38	1361.38	#N/A	#N/A	7.12331	Q2/2015	7.1231	7.12331	-0.000211773		1361.38	5
Q3/2015	2015-09-30	2124.13	514.676	626.336	1365.85	464.647	584.116	83544	341.904				Q3/2015	339.58	1365.85	1365.85	#N/A	#N/A	1.31956	Q3/2015	1.3196	1.31956	4.07977e-05		1365.85	5.1
Q4/2015	2015-12-31	2111.93	524.216	630.696	1359.42	473.215	579.306	82851	344.652				Q4/2015	337.98	1359.42	1359.42	#N/A	#N/A	-1.87011	Q4/2015	-1.8702	-1.87011	-8.91564e-05		1359.42	5.2
Q1/2016	2016-03-31	2098.08	516.264	634.5	1373.04	470.013	591.227	83326	349.464				Q1/2016	341.37	1373.04	1373.04	#N/A	#N/A	4.07005	Q1/2016	4.0702	4.07005	0.000152131
Q2/2016	2016-06-30	2112.5	530.792	632.36	1390.7	478.354	569.913	82877	356.912				Q2/2016	345.76	1390.7	1390.7	#N/A	#N/A	5.24458	Q2/2016	5.2446	5.24458	1.80641e-05
Q3/2016	2016-09-30	2145.28	521.22	637.844	1387.76	482.587	582.014	84734	355.044				Q3/2016	345.03	1387.76	1387.76	#N/A	#N/A	-0.843795	Q3/2016	-0.8439	-0.843795	-0.000104818
Q4/2016	2016-12-31	2124.38	548.412	644.724	1406.07	491.696	583.611	87027	360.324				Q4/2016	349.58	1406.07	1406.07	#N/A	#N/A	5.38384	Q4/2016	5.3839	5.38384	6.14793e-05
Q1/2017	2017-03-31	2162.3	547.572	642.556	1429.76	501.094	587.498	88829	369.112				Q1/2017	355.13	1429.76	1429.76	#N/A	#N/A	6.90948	Q1/2017	6.9093	6.90948	-0.000184567
Q2/2017	2017-06-30	2181.15	557.8	655.092	1444.36	502.067	596.548	88772	372.96				Q2/2017	359.17	1444.36	1444.36	#N/A	#N/A	4.14962	Q2/2017	4.1497	4.14962	7.57108e-05
Q3/2017	2017-09-30	2192.42	568.052	659.692	1469.65	512.053	580.383	90536	375.084				Q3/2017	365.41	1469.65	1469.65	#N/A	#N/A	7.18988	Q3/2017	7.1899	7.18988	1.53773e-05
Q4/2017	2017-12-31	2229.78	563.128	676.048	1509.88	522.277	584.654	92533	376.068				Q4/2017	375	1509.88	1509.88	#N/A	#N/A	11.4056	Q4/2017	11.4056	11.4056	-8.76378e-06
Q1/2018	2018-03-31	2256.3	560.24	675.18	1504.18	528.068	586.834	93124	382.988				Q1/2018	371.1	1504.18	1504.18	#N/A	#N/A	-1.50022	Q1/2018	-1.5	-1.50022	0.000217589
Q2/2018	2018-06-30	2283.99	564.722	679.824	1521.33	533.911	592.617	94154	388.426				Q2/2018		1521.33	1521.33	#N/A	#N/A	4.63866	Q2/2018	4.6386	4.63866	-5.97769e-05
Q3/2018	2018-09-30	2310.91	569.24	687.05	1538.22	539.819	601.313	95196	393.243				Q3/2018		1538.22	1538.22	#N/A	#N/A	4.51454	Q3/2018	4.5145	4.51454	-3.89826e-05
Q4/2018	2018-12-31	2336.48	573.794	694.353	1555.24	545.792	608.692	96249	397.804				Q4/2018		1555.24	1555.24	#N/A	#N/A	4.4999	Q4/2018	4.5	4.4999	9.58137e-05
Q1/2019	2019-03-31	2362.34	578.556	701.608	1572.45	551.831	614.69	97314	401.981				Q1/2019		1572.45	1572.45	#N/A	#N/A	4.50008	Q1/2019	4.5	4.50008	-8.43661e-05
Q2/2019	2019-06-30	2387.05	583.474	708.938	1589.85	557.269	620.746	98391	406.137				Q2/2019		1589.85	1589.85	#N/A	#N/A	4.49997	Q2/2019	4.5	4.49997	2.63051e-05
Q3/2019	2019-09-30	2410.57	588.433	716.346	1607.33	562.76	626.863	99480	410.287				Q3/2019		1607.33	1607.33	#N/A	#N/A	4.47306	Q3/2019	4.4731	4.47306	4.28333e-05
Q4/2019	2019-12-31	2434.32	593.435	723.83	1624.85	568.305	633.04	100580	414.379				Q4/2019		1624.85	1624.85	#N/A	#N/A	4.43182	Q4/2019	4.4318	4.43182	-2.34963e-05

## Sheet: Total GDP
Q1/1960 !Q mag=bil	.excel_last	Q111gdpc@OUTLOOK	Q112gdpc@OUTLOOK	Q132gdpc@OUTLOOK		Q136gdpc@OUTLOOK	Q156gdpc@OUTLOOK	Q158gdpc@OUTLOOK	Q184gdpc@OUTLOOK			Q134gdpc@OUTLOOK		Q134GDVA@outlook	Comparison				(Q134GDVA@outlook) - historical
.DESC		United States: Gross Domestic Product, Vol, Market Prices(SAAR,Bil.Chn.2009.US$)	UK: Gross Domestic Product, Volume, Market Prices(SAAR,Bil.Chn.2015.Pound)	France: Gross Domestic Product, Volume, Market Prices(SAAR,Bil.Chn.2010.Euro)	Germany: Gross Domestic Product, Volume, Market Prices(Bil.Ch.2005.EUR)	Italy: Gross Domestic Product, Volume, Market Prices(SAAR,Bil.Chn.2010.Euro)	Canada: Gross Domestic Product, Volume, Market Prices(SAAR,Bil.Chn.2007.C$)	Japan: Gross Domestic Product, Volume, Market Prices(SAAR,Bil.Chn.2011.Yen)	Spain: Gross Domestic Product, Volume, Market Prices(SAAR,Bil.Chn.2010.Euro)			Germany: Gross Domestic Product, Volume, Market Prices(SAAR,Bil.Chn.2010.Euro)		Germany: GDP, Volume, Growth (Annualized % Change)					Germany: GDP, Volume, Growth(Annualized % Change)
.T1		Q1-1960	Q1-1960	Q1-1960	Q1-1960	Q1-1960	Q1-1960	Q1-1960	Q1-1960			Q1-1991		Q2-1991					Q2-1960
.TN		Q4-2019	Q4-2019	Q4-2019	Q4-2019	Q4-2019	Q4-2019	Q4-2019	Q4-2019			Q4-2019		Q4-2019					Q4-2015
.LSOURCE		Organization for Economic Cooperation & Development	Organization for Economic Cooperation & Development	Organization for Economic Cooperation & Development	Organization for Economic Cooperation & Devt	Organization for Economic Cooperation & Development	Organization for Economic Cooperation & Development	Organization for Economic Cooperation & Development	Organization for Economic Cooperation & Development			Organization for Economic Cooperation & Development		Organization for Economic Cooperation & Development				Historical Germany Series	Organization for Economic Cooperation & Devt
.DTLM		May-30-2018 07:53	May-30-2018 07:53	May-30-2018 07:53		May-30-2018 07:53	May-30-2018 07:53	May-30-2018 07:53	May-30-2018 07:53			May-30-2018 07:53		May-30-2018 07:53					May-09-2014 15:38
Q1/1960	1960-03-31	3123.16	513.548	439.358	743.893	412.155	#N/A	61627	166.449			#N/A	#N/A	#N/A				743.893	#N/A
Q2/1960	1960-06-30	3111.31	509.74	450.364	746.354	418.204	#N/A	61745	167.473			#N/A	#N/A	#N/A	#N/A	#N/A		746.354	1.33
Q3/1960	1960-09-30	3119.06	517.508	457.958	751.269	424.345	#N/A	63868	170.444			#N/A	#N/A	#N/A	#N/A	#N/A		751.269	2.66
Q4/1960	1960-12-31	3081.3	520.7	462.815	759.236	424.671	#N/A	66324	175.531			#N/A	#N/A	#N/A	#N/A	#N/A		759.236	4.31
Q1/1961	1961-03-31	3102.25	529.056	469.241	770.268	439.886	316.042	68340	182.735			#N/A	#N/A	#N/A	#N/A	#N/A		770.268	5.94
Q2/1961	1961-06-30	3159.92	531.308	472.229	780.703	449.192	323.99	69792	189.002			#N/A	#N/A	#N/A	#N/A	#N/A		780.703	5.53
Q3/1961	1961-09-30	3212.61	528.584	476.692	790.528	459.661	331.816	71121	194.332			#N/A	#N/A	#N/A	#N/A	#N/A		790.528	5.13
Q4/1961	1961-12-31	3277.72	527.66	485.061	800.725	468.455	336.461	74367	199.072			#N/A	#N/A	#N/A	#N/A	#N/A		800.725	5.26
Q1/1962	1962-03-31	3336.75	530.072	495.077	811.284	475.388	345.37	75343	203.221			#N/A	#N/A	#N/A	#N/A	#N/A		811.284	5.38
Q2/1962	1962-06-30	3372.71	535.084	502.582	820.104	480.506	347.88	76387	207.756			#N/A	#N/A	#N/A	#N/A	#N/A		820.104	4.42
Q3/1962	1962-09-30	3404.83	538.332	512.302	827.167	483.391	352.445	77321	212.677			#N/A	#N/A	#N/A	#N/A	#N/A		827.167	3.49
Q4/1962	1962-12-31	3418.05	536.464	517.791	831.822	490.649	359.61	78951	218.048			#N/A	#N/A	#N/A	#N/A	#N/A		831.822	2.27
Q1/1963	1963-03-31	3456.08	539.224	514.905	834.079	493.907	361.767	80056	223.87			#N/A	#N/A	#N/A	#N/A	#N/A		834.079	1.09
Q2/1963	1963-06-30	3501.13	562.412	536.192	840.041	507.446	367.071	82425	228.778			#N/A	#N/A	#N/A	#N/A	#N/A		840.041	2.89
Q3/1963	1963-09-30	3569.48	564.992	553.403	849.722	515.775	369.892	84840	232.775			#N/A	#N/A	#N/A	#N/A	#N/A		849.722	4.69
Q4/1963	1963-12-31	3594.95	577.628	553.604	862.983	521.08	381.51	87747	235.843			#N/A	#N/A	#N/A	#N/A	#N/A		862.983	6.39
Q1/1964	1964-03-31	3672.71	581.132	565.424	879.809	528.803	390.966	90514	237.982			#N/A	#N/A	#N/A	#N/A	#N/A		879.809	8.03
Q2/1964	1964-06-30	3716.38	591.26	571.923	894.963	523.452	392.312	92674	240.651			#N/A	#N/A	#N/A	#N/A	#N/A		894.963	7.07
Q3/1964	1964-09-30	3766.86	593.608	577.199	908.438	522.568	396.437	94093	243.851			#N/A	#N/A	#N/A	#N/A	#N/A		908.438	6.16
Q4/1964	1964-12-31	3780.22	602.516	585.367	921.159	520.382	398.529	95267	247.329			#N/A	#N/A	#N/A	#N/A	#N/A		921.159	5.72
Q1/1965	1965-03-31	3873.45	600.852	588.832	933.129	527.407	411.048	96049	251.084			#N/A	#N/A	#N/A	#N/A	#N/A		933.129	5.3
Q2/1965	1965-06-30	3926.41	601.576	598.825	944.018	537.923	414.904	97245	255.175			#N/A	#N/A	#N/A	#N/A	#N/A		944.018	4.75
Q3/1965	1965-09-30	4006.15	606.524	607.491	953.801	545.089	420.509	99434	259.602			#N/A	#N/A	#N/A	#N/A	#N/A		953.801	4.21
Q4/1965	1965-12-31	4100.63	610.228	616.577	963.014	553.278	430.85	100954	264.598			#N/A	#N/A	#N/A	#N/A	#N/A		963.014	3.92
Q1/1966	1966-03-31	4201.89	611.264	622.306	971.637	558.629	439.089	103617	270.162			#N/A	#N/A	#N/A	#N/A	#N/A		971.637	3.63
Q2/1966	1966-06-30	4219.1	614.832	631.753	976.937	566.585	448.336	107651	274.841			#N/A	#N/A	#N/A	#N/A	#N/A		976.937	2.2
Q3/1966	1966-09-30	4249.15	616.864	639.66	978.934	582.591	448.164	110268	278.634			#N/A	#N/A	#N/A	#N/A	#N/A		978.934	0.82
Q4/1966	1966-12-31	4285.58	614.288	644.258	976.181	585.383	453.571	112492	281.488			#N/A	#N/A	#N/A	#N/A	#N/A		976.181	-1.12
Q1/1967	1967-03-31	4324.93	622.644	654.675	968.676	597.062	452.519	115515	283.403			#N/A	#N/A	#N/A	#N/A	#N/A		968.676	-3.04
Q2/1967	1967-06-30	4328.72	631.376	662.009	967.706	609.904	462.013	118655	286.152			#N/A	#N/A	#N/A	#N/A	#N/A		967.706	-0.4
Q3/1967	1967-09-30	4366.09	634.156	670.113	973.294	619.302	463.552	122791	289.734			#N/A	#N/A	#N/A	#N/A	#N/A		973.294	2.33
Q4/1967	1967-12-31	4401.23	637.54	676.85	984.346	631.54	465.306	125175	293.802			#N/A	#N/A	#N/A	#N/A	#N/A		984.346	4.62
Q1/1968	1968-03-31	4490.61	660.724	693.736	1006.68	633.075	469.082	128160	298.357			#N/A	#N/A	#N/A	#N/A	#N/A		1006.68	9.39
Q2/1968	1968-06-30	4566.44	657.932	658.807	1014.44	646.336	481.821	132539	303.709			#N/A	#N/A	#N/A	#N/A	#N/A		1014.44	3.12
Q3/1968	1968-09-30	4599.33	670.94	709.785	1036.56	661.877	488.327	135554	309.86			#N/A	#N/A	#N/A	#N/A	#N/A		1036.56	9.01
Q4/1968	1968-12-31	4619.8	673.54	718.944	1051.99	677.371	495.058	143300	317.234			#N/A	#N/A	#N/A	#N/A	#N/A		1051.99	6.09
Q1/1969	1969-03-31	4691.64	672.136	726.067	1078.19	687.979	501.473	144595	325.831			#N/A	#N/A	#N/A	#N/A	#N/A		1078.19	10.34
Q2/1969	1969-06-30	4706.68	677.088	741.193	1091.71	700.403	503.882	148815	332.788			#N/A	#N/A	#N/A	#N/A	#N/A		1091.71	5.11
Q3/1969	1969-09-30	4736.14	680.856	751.282	1114.82	702.078	509.197	152365	338.105			#N/A	#N/A	#N/A	#N/A	#N/A		1114.82	8.74
Q4/1969	1969-12-31	4715.47	684.296	762.62	1131.55	687.886	516.368	158270	341.923			#N/A	#N/A	#N/A	#N/A	#N/A		1131.55	6.14
Q1/1970	1970-03-31	4707.11	680.06	774.427	1113.17	720.047	519.629	163051	346.88			#N/A	#N/A	#N/A	#N/A	#N/A		1113.17	-6.34
Q2/1970	1970-06-30	4715.44	695.948	787.197	1157.44	725.304	519.415	164973	347.431			#N/A	#N/A	#N/A	#N/A	#N/A		1157.44	16.88
Q3/1970	1970-09-30	4757.21	702.904	795.25	1179.05	739.856	524.714	169353	349.207			#N/A	#N/A	#N/A	#N/A	#N/A		1179.05	7.68
Q4/1970	1970-12-31	4708.28	708.968	805.758	1189.03	740.683	525.599	168780	351.962			#N/A	#N/A	#N/A	#N/A	#N/A		1189.03	3.43
Q1/1971	1971-03-31	4834.35	704.912	818.62	1166.18	736.809	522.45	170303	354.711			#N/A	#N/A	#N/A	#N/A	#N/A		1166.18	-7.47
Q2/1971	1971-06-30	4861.94	717.476	827.231	1190.64	739.918	537.726	173057	361.63			#N/A	#N/A	#N/A	#N/A	#N/A		1190.64	8.66
Q3/1971	1971-09-30	4899.95	729.86	838.553	1211.24	750.756	552.546	175194	368.284			#N/A	#N/A	#N/A	#N/A	#N/A		1211.24	7.1
Q4/1971	1971-12-31	4914.26	732.772	846.54	1210.21	754.995	558.821	176842	375.699			#N/A	#N/A	#N/A	#N/A	#N/A		1210.21	-0.34
Q1/1972	1972-03-31	5002.44	733.628	855.931	1211.44	763.336	556.644	182677	381.795			#N/A	#N/A	#N/A	#N/A	#N/A		1211.44	0.41
Q2/1972	1972-06-30	5118.28	753.164	863.243	1231.22	762.99	572.472	186161	390.816			#N/A	#N/A	#N/A	#N/A	#N/A		1231.22	6.69
Q3/1972	1972-09-30	5165.45	755.236	875.635	1259.99	773.277	573.775	190149	399.402			#N/A	#N/A	#N/A	#N/A	#N/A		1259.99	9.68
Q4/1972	1972-12-31	5251.23	767.104	889.382	1279.56	776.952	587.501	194915	407.314			#N/A	#N/A	#N/A	#N/A	#N/A		1279.56	6.36
Q1/1973	1973-03-31	5380.5	805.112	904.92	1297.26	783.956	602.991	201382	414.811			#N/A	#N/A	#N/A	#N/A	#N/A		1297.26	5.65
Q2/1973	1973-06-30	5441.5	806.116	919.471	1306.85	807.448	609.572	203174	422.207			#N/A	#N/A	#N/A	#N/A	#N/A		1306.85	2.99
Q3/1973	1973-09-30	5411.94	798.604	933.919	1311.14	833.14	611.637	203718	429.18			#N/A	#N/A	#N/A	#N/A	#N/A		1311.14	1.32
Q4/1973	1973-12-31	5462.4	795.156	944.2	1314.41	853.49	623.158	206187	436.242			#N/A	#N/A	#N/A	#N/A	#N/A		1314.41	1
Q1/1974	1974-03-31	5417.02	773.432	960.112	1325.54	860.412	627.696	199060	443.651			#N/A	#N/A	#N/A	#N/A	#N/A		1325.54	3.43
Q2/1974	1974-06-30	5431.27	784.624	966.852	1324.51	868.629	634.642	200467	449.257			#N/A	#N/A	#N/A	#N/A	#N/A		1324.51	-0.31
Q3/1974	1974-09-30	5378.68	789.708	975.883	1324.51	870.077	633.896	203023	452.427			#N/A	#N/A	#N/A	#N/A	#N/A		1324.51	0
Q4/1974	1974-12-31	5357.17	778.272	958.965	1307.77	851.89	630.935	201933	452.726			#N/A	#N/A	#N/A	#N/A	#N/A		1307.77	-4.96
Q1/1975	1975-03-31	5292.44	778.628	952.716	1300.22	837.07	626.666	202226	450.454			#N/A	#N/A	#N/A	#N/A	#N/A		1300.22	-2.29
Q2/1975	1975-06-30	5333.22	765.832	950.108	1293.7	836.638	634.862	206735	450.08			#N/A	#N/A	#N/A	#N/A	#N/A		1293.7	-1.99
Q3/1975	1975-09-30	5421.36	763.312	950.451	1307.77	848.53	646.715	209097	452.046			#N/A	#N/A	#N/A	#N/A	#N/A		1307.77	4.42
Q4/1975	1975-12-31	5494.45	772.028	970.084	1333.48	858.037	654.176	211295	455.223			#N/A	#N/A	#N/A	#N/A	#N/A		1333.48	8.1
Q1/1976	1976-03-31	5618.52	784.312	979.605	1345.45	873.154	665.547	213074	459.747			#N/A	#N/A	#N/A	#N/A	#N/A		1345.45	3.64
Q2/1976	1976-06-30	5660.97	782.948	993.127	1365.45	888.936	679.932	214325	465.054			#N/A	#N/A	#N/A	#N/A	#N/A		1365.45	6.08
Q3/1976	1976-09-30	5689.76	792.72	1004.1	1365.86	911.527	682.893	217332	469.565			#N/A	#N/A	#N/A	#N/A	#N/A		1365.86	0.12
Q4/1976	1976-12-31	5732.46	809.444	1010.86	1391.17	927.339	684.336	217588	473.17			#N/A	#N/A	#N/A	#N/A	#N/A		1391.17	7.62
Q1/1977	1977-03-31	5799.16	809.9	1022.5	1403.05	927.707	693.792	222345	476.919			#N/A	#N/A	#N/A	#N/A	#N/A		1403.05	3.46
Q2/1977	1977-06-30	5912.98	803.928	1025.8	1411.02	922.541	697.734	223909	479.082			#N/A	#N/A	#N/A	#N/A	#N/A		1411.02	2.29
Q3/1977	1977-09-30	6017.59	809.544	1035.12	1410.59	913.912	701.092	225434	480.674			#N/A	#N/A	#N/A	#N/A	#N/A		1410.59	-0.12
Q4/1977	1977-12-31	6018.22	823.484	1043.55	1434.86	921.743	712.259	228490	483.886			#N/A	#N/A	#N/A	#N/A	#N/A		1434.86	7.06
Q1/1978	1978-03-31	6039.16	830.616	1057.31	1440.77	936.807	718.352	232804	486.906			#N/A	#N/A	#N/A	#N/A	#N/A		1440.77	1.66
Q2/1978	1978-06-30	6273.96	840.72	1068.57	1446.5	953.011	724.944	235077	487.893			#N/A	#N/A	#N/A	#N/A	#N/A		1446.5	1.6
Q3/1978	1978-09-30	6335.32	852.08	1077.11	1465.47	958.026	730.168	238141	487.294			#N/A	#N/A	#N/A	#N/A	#N/A		1465.47	5.35
Q4/1978	1978-12-31	6420.29	859.868	1088.78	1482.61	972.625	736.374	241614	486.573			#N/A	#N/A	#N/A	#N/A	#N/A		1482.61	4.76
Q1/1979	1979-03-31	6433.04	856.516	1098.3	1484.46	987.992	742.708	245278	485.797			#N/A	#N/A	#N/A	#N/A	#N/A		1484.46	0.5
Q2/1979	1979-06-30	6440.83	894.496	1104.19	1530.55	995.176	752.786	249794	486.552			#N/A	#N/A	#N/A	#N/A	#N/A		1530.55	13.01
Q3/1979	1979-09-30	6487.08	874.836	1118.74	1530.55	1012.4	757.657	251718	487.723			#N/A	#N/A	#N/A	#N/A	#N/A		1530.55	0
Q4/1979	1979-12-31	6503.87	884.02	1121.68	1539.95	1036.23	762.752	252814	489.437			#N/A	#N/A	#N/A	#N/A	#N/A		1539.95	2.48
Q1/1980	1980-03-31	6524.91	875.38	1132.79	1552.28	1040.49	768.143	253773	492.714			#N/A	#N/A	#N/A	#N/A	#N/A		1552.28	3.24
Q2/1980	1980-06-30	6392.58	858.116	1126.26	1542.29	1042.67	767.89	252435	494.389			#N/A	#N/A	#N/A	#N/A	#N/A		1542.29	-2.55
Q3/1980	1980-09-30	6382.89	857.12	1127.62	1536.16	1041.01	766.85	258056	492.429			#N/A	#N/A	#N/A	#N/A	#N/A		1536.16	-1.58
Q4/1980	1980-12-31	6501.18	848.08	1126.24	1534.12	1047.84	777.55	263503	495.285			#N/A	#N/A	#N/A	#N/A	#N/A		1534.12	-0.53
Q1/1981	1981-03-31	6635.73	846.676	1130.66	1552.39	1047.24	794.832	265089	492.481			#N/A	#N/A	#N/A	#N/A	#N/A		1552.39	4.85
Q2/1981	1981-06-30	6587.27	848.688	1136.35	1548.49	1049.29	803.602	268300	491.936			#N/A	#N/A	#N/A	#N/A	#N/A		1548.49	-1
Q3/1981	1981-09-30	6662.86	857.912	1143.77	1552.58	1049.77	796.401	267688	494.123			#N/A	#N/A	#N/A	#N/A	#N/A		1552.58	1.06
Q4/1981	1981-12-31	6585.13	858.908	1151.44	1551.34	1058.29	792.772	269620	493.63			#N/A	#N/A	#N/A	#N/A	#N/A		1551.34	-0.32
Q1/1982	1982-03-31	6474.97	860.324	1160.62	1557.16	1057.87	783.342	273723	495.662			#N/A	#N/A	#N/A	#N/A	#N/A		1557.16	1.51
Q2/1982	1982-06-30	6510.25	869.956	1167.97	1547.57	1054.87	774.312	275601	497.544			#N/A	#N/A	#N/A	#N/A	#N/A		1547.57	-2.44
Q3/1982	1982-09-30	6486.8	872.184	1169.76	1532.26	1054.3	767.485	276825	500.893			#N/A	#N/A	#N/A	#N/A	#N/A		1532.26	-3.9
Q4/1982	1982-12-31	6493.13	878.324	1175.52	1535.92	1051.24	760.402	280700	502.659			#N/A	#N/A	#N/A	#N/A	#N/A		1535.92	0.96
Q1/1983	1983-03-31	6578.18	894.26	1180.75	1549.86	1054.18	772.908	280940	504.496			#N/A	#N/A	#N/A	#N/A	#N/A		1549.86	3.68
Q2/1983	1983-06-30	6728.29	901.904	1181.24	1566.19	1052.91	788.268	283053	507.612			#N/A	#N/A	#N/A	#N/A	#N/A		1566.19	4.28
Q3/1983	1983-09-30	6860.02	911.848	1182.44	1562.93	1072.52	797.2	287226	508.358			#N/A	#N/A	#N/A	#N/A	#N/A		1562.93	-0.83
Q4/1983	1983-12-31	7001.49	919.732	1189.04	1584.55	1096.29	807.342	289509	511.643			#N/A	#N/A	#N/A	#N/A	#N/A		1584.55	5.65
Q1/1984	1984-03-31	7140.6	926.056	1196.21	1605.52	1094.14	821.188	292671	515.875			#N/A	#N/A	#N/A	#N/A	#N/A		1605.52	5.4
Q2/1984	1984-06-30	7266.01	917.992	1200	1580.25	1097.66	837.251	297019	514.285			#N/A	#N/A	#N/A	#N/A	#N/A		1580.25	-6.15
Q3/1984	1984-09-30	7337.49	923.964	1207.1	1623.3	1110.59	840.804	300661	518.764			#N/A	#N/A	#N/A	#N/A	#N/A		1623.3	11.35
Q4/1984	1984-12-31	7396.02	942.308	1208.7	1636.96	1110.77	854.056	301298	519.426			#N/A	#N/A	#N/A	#N/A	#N/A		1636.96	3.41
Q1/1985	1985-03-31	7469.55	950.248	1210.72	1628.05	1117.12	867.029	308872	525.223			#N/A	#N/A	#N/A	#N/A	#N/A		1628.05	-2.16
Q2/1985	1985-06-30	7537.93	970.512	1220.02	1644.37	1131.87	869.814	315242	524.729			#N/A	#N/A	#N/A	#N/A	#N/A		1644.37	4.07
Q3/1985	1985-09-30	7655.2	971.424	1227.8	1665.77	1140.94	880.826	319406	530.169			#N/A	#N/A	#N/A	#N/A	#N/A		1665.77	5.31
Q4/1985	1985-12-31	7712.62	973.796	1232.57	1675.76	1148.55	894.378	323600	536.258			#N/A	#N/A	#N/A	#N/A	#N/A		1675.76	2.42
Q1/1986	1986-03-31	7784.11	984.72	1237.1	1666.17	1155.71	894.18	324762	537.77			#N/A	#N/A	#N/A	#N/A	#N/A		1666.17	-2.27
Q2/1986	1986-06-30	7819.84	991.904	1250.69	1685.33	1163.18	899.328	323918	550.578			#N/A	#N/A	#N/A	#N/A	#N/A		1685.33	4.68
Q3/1986	1986-09-30	7898.56	996.296	1256.57	1697.79	1174.79	900.475	325830	546.696			#N/A	#N/A	#N/A	#N/A	#N/A		1697.79	2.99
Q4/1986	1986-12-31	7939.45	1013.84	1258.75	1714.72	1179.62	893.988	328483	550.188			#N/A	#N/A	#N/A	#N/A	#N/A		1714.72	4.05
Q1/1987	1987-03-31	7994.97	1022.93	1262.56	1671.68	1184.45	914.692	328414	561.457			#N/A	#N/A	#N/A	#N/A	#N/A		1671.68	-9.67
Q2/1987	1987-06-30	8084.71	1037.73	1277.42	1709.22	1202.38	926.552	335353	569.857			#N/A	#N/A	#N/A	#N/A	#N/A		1709.22	9.29
Q3/1987	1987-09-30	8158.03	1062.81	1286.62	1721.06	1205.86	940.746	342032	581.626			#N/A	#N/A	#N/A	#N/A	#N/A		1721.06	2.8
Q4/1987	1987-12-31	8292.69	1074.86	1305.32	1748.62	1218.83	952.961	350713	593.524			#N/A	#N/A	#N/A	#N/A	#N/A		1748.62	6.56
Q1/1988	1988-03-31	8339.32	1094.17	1322.48	1732.75	1236.77	966.9	358867	595.433			#N/A	#N/A	#N/A	#N/A	#N/A		1732.75	-3.58
Q2/1988	1988-06-30	8449.51	1100.71	1332.47	1764.16	1244.62	975.491	358250	602.716			#N/A	#N/A	#N/A	#N/A	#N/A		1764.16	7.45
Q3/1988	1988-09-30	8498.28	1117.55	1349.71	1784.15	1260.98	975.571	366205	613.582			#N/A	#N/A	#N/A	#N/A	#N/A		1784.15	4.61
Q4/1988	1988-12-31	8610.85	1127.19	1364.35	1805.14	1276.03	982.426	370136	612.206			#N/A	#N/A	#N/A	#N/A	#N/A		1805.14	4.79
Q1/1989	1989-03-31	8697.71	1132.09	1384.61	1824.02	1283.96	993.631	380266	626.643			#N/A	#N/A	#N/A	#N/A	#N/A		1824.02	4.25
Q2/1989	1989-06-30	8766.1	1139.46	1397.11	1831.36	1289.51	997.448	375433	632.809			#N/A	#N/A	#N/A	#N/A	#N/A		1831.36	1.62
Q3/1989	1989-09-30	8831.54	1140.56	1408.49	1848.07	1302.95	1001.05	382023	641.287			#N/A	#N/A	#N/A	#N/A	#N/A		1848.07	3.7
Q4/1989	1989-12-31	8850.23	1141.59	1419.52	1869.51	1316.36	998.903	393789	640.222			#N/A	#N/A	#N/A	#N/A	#N/A		1869.51	4.72
Q1/1990	1990-03-31	8947.13	1149.27	1441.37	1908.33	1321.61	1008.28	391830	645.831			#N/A	#N/A	#N/A	#N/A	#N/A		1908.33	8.57
Q2/1990	1990-06-30	8981.73	1155.18	1442.34	1917.71	1325.64	1004.09	404089	656.808			#N/A	#N/A	#N/A	#N/A	#N/A		1917.71	1.98
Q3/1990	1990-09-30	8983.94	1143.19	1443.75	1958.08	1327.76	996.88	410834	654.847			#N/A	#N/A	#N/A	#N/A	#N/A		1958.08	8.69
Q4/1990	1990-12-31	8907.36	1139.38	1447.47	1992.55	1319.14	987.944	410099	679.612			#N/A	#N/A	#N/A	#N/A	#N/A		1992.55	7.23
Q1/1991	1991-03-31	8865.56	1136.17	1445.78	2049.86	1345.17	973.65	413748	666.551			2049.86	2049.86	#N/A	#N/A	#N/A		2049.86	12.01
Q2/1991	1991-06-30	8934.37	1134.79	1456.36	2041.34	1337.81	978.103	418660	674.678			2041.34	2041.34	-1.6511	-1.65125	0.000153989		2041.34	-1.64
Q3/1991	1991-09-30	8977.25	1132.2	1461.4	2031.02	1338.29	979.352	417693	679.774			2031.02	2031.02	-2.0069	-2.00691	1.49296e-05		2031.02	-2.12
Q4/1991	1991-12-31	9016.44	1134.02	1470.33	2057.34	1354	981.117	420502	683.156			2057.34	2057.34	5.2845	5.28462	-0.000115099		2057.34	5.8
Q1/1992	1992-03-31	9122.95	1133.96	1482.6	2090.3	1357.64	981.762	420450	689.972			2090.3	2090.3	6.5639	6.56392	-2.35587e-05		2090.3	6.42
Q2/1992	1992-06-30	9223.55	1132.56	1480.56	2076.63	1356.86	982.944	421822	680.975			2076.63	2076.63	-2.5911	-2.59109	-6.18173e-06		2076.63	-2.98
Q3/1992	1992-09-30	9313.21	1139.81	1479.83	2070.43	1353.85	988.234	422308	681.41			2070.43	2070.43	-1.1874	-1.18738	-2.00046e-05		2070.43	-1.35
Q4/1992	1992-12-31	9406.53	1147.83	1476.17	2066.05	1344.52	993.826	419705	676.97			2066.05	2066.05	-0.8446	-0.84467	6.98117e-05		2066.05	-0.19
Q1/1993	1993-03-31	9424.07	1156.23	1465.8	2047.86	1342.64	1000.15	424583	670.654			2047.86	2047.86	-3.4755	-3.47546	-3.7093e-05		2047.86	-3.82
Q2/1993	1993-06-30	9480.11	1162.11	1469.16	2048.89	1339.4	1009.25	421999	670.608			2048.89	2048.89	0.2017	0.201729	-2.89017e-05		2048.89	0.14
Q3/1993	1993-09-30	9526.34	1171.46	1473.76	2063.34	1337.29	1018.89	419003	678.677			2063.34	2063.34	2.8508	2.85082	-2.43545e-05		2063.34	3.06
Q4/1993	1993-12-31	9653.51	1179.44	1477.68	2062.05	1347.09	1023.27	421582	681.234			2062.05	2062.05	-0.2499	-0.249846	-5.43388e-05		2062.05	-0.84
Q1/1994	1994-03-31	9748.16	1193.62	1484.71	2087.27	1357.35	1038.33	424882	686.869			2087.27	2087.27	4.9827	4.98271	-7.18738e-06		2087.27	5.4
Q2/1994	1994-06-30	9881.38	1207.48	1501.97	2094.49	1367.18	1053.54	422691	688.375			2094.49	2094.49	1.3916	1.3916	3.64985e-06		2094.49	1.49
Q3/1994	1994-09-30	9939.66	1221.18	1512.64	2110.23	1375.7	1067	428079	693.84			2110.23	2110.23	3.0397	3.03964	5.78517e-05		2110.23	3.23
Q4/1994	1994-12-31	10052.5	1228.12	1523.49	2138.1	1388.62	1074.75	426084	696.437			2138.1	2138.1	5.3874	5.38743	-2.89218e-05		2138.1	4.52
Q1/1995	1995-03-31	10086.9	1232.24	1532.01	2128.36	1406.05	1084.66	430441	703.88			2128.36	2128.36	-1.8098	-1.80995	0.000152985		2128.36	-1.52
Q2/1995	1995-06-30	10122.1	1236.68	1539.6	2146.93	1407.04	1085.03	435771	708.72			2146.93	2146.93	3.5373	3.5375	-0.000204646		2146.93	3.98
Q3/1995	1995-09-30	10208.8	1248.85	1540.26	2154.16	1413.3	1086.45	440611	712.092			2154.16	2154.16	1.3528	1.35273	7.16512e-05		2154.16	1.04
Q4/1995	1995-12-31	10281.2	1252.42	1541.9	2153.12	1425	1090.85	441577	717.108			2153.12	2153.12	-0.1915	-0.191492	-8.17638e-06		2153.12	-0.54
Q1/1996	1996-03-31	10348.7	1263.8	1553.19	2131.58	1431.18	1091.53	445734	721.736			2131.58	2131.58	-3.9425	-3.94252	1.70227e-05		2131.58	-3.86
Q2/1996	1996-06-30	10529.4	1267.79	1554.79	2162.03	1423.72	1099.13	450709	726.328			2162.03	2162.03	5.8365	5.8365	-7.96173e-07		2162.03	6.28
Q3/1996	1996-09-30	10626.8	1276.38	1564.03	2175.18	1426.93	1108.77	450526	733.404			2175.18	2175.18	2.4567	2.4567	3.05788e-06		2175.18	2.44
Q4/1996	1996-12-31	10739.1	1288.4	1565.93	2187.31	1426.08	1117.59	455632	736.34			2187.31	2187.31	2.2486	2.2486	3.90856e-06		2187.31	1.25
Q1/1997	1997-03-31	10820.9	1307.03	1570.24	2174.15	1429.92	1132.33	457225	744.724			2174.15	2174.15	-2.3844	-2.38444	3.81122e-05		2174.15	-2.26
Q2/1997	1997-06-30	10984.1	1321.04	1590.93	2204.86	1449.35	1145.09	453809	751.528			2204.86	2204.86	5.7693	5.76932	-2.25892e-05		2204.86	5.98
Q3/1997	1997-09-30	11124	1328.91	1602.49	2213.37	1458.09	1158.77	455321	759.128			2213.37	2213.37	1.5536	1.55356	3.89693e-05		2213.37	1.33
Q4/1997	1997-12-31	11210.3	1345.2	1620.35	2229.11	1482.05	1169.87	455643	770.092			2229.11	2229.11	2.8746	2.87465	-4.99952e-05		2229.11	2.84
Q1/1998	1998-03-31	11321.2	1352.64	1634.31	2246.97	1472.42	1186.28	450324	777.744			2246.97	2246.97	3.245	3.24488	0.000119484		2246.97	3
Q2/1998	1998-06-30	11431	1360.57	1646.13	2239.75	1478.11	1186.79	448684	783.624			2239.75	2239.75	-1.2798	-1.27981	7.772e-06		2239.75	-1.51
Q3/1998	1998-09-30	11580.6	1370.52	1660.03	2245.68	1480.09	1197.8	449343	793.02			2245.68	2245.68	1.064	1.06398	1.9821e-05		2245.68	1.18
Q4/1998	1998-12-31	11770.7	1384.8	1670.69	2245.17	1473.21	1213.98	453087	801.352			2245.17	2245.17	-0.0919	-0.091878	-2.20364e-05		2245.17	-0.09
Q1/1999	1999-03-31	11864.7	1393.14	1680.24	2263.16	1481.92	1235.99	446648	807.844			2263.16	2263.16	3.245	3.24511	-0.000111533		2263.16	3.11
Q2/1999	1999-06-30	11962.5	1394.1	1695.46	2268.07	1488.26	1246.37	448690	820.024			2268.07	2268.07	0.8692	0.869216	-1.62628e-05		2268.07	0.52
Q3/1999	1999-09-30	12113.1	1418.56	1716.13	2291.8	1500.68	1265.78	450773	829.82			2291.8	2291.8	4.2523	4.25229	7.11028e-06		2291.8	4.45
Q4/1999	1999-12-31	12323.3	1438.64	1737.32	2320.44	1521.95	1283.77	450788	839.584			2320.44	2320.44	5.0928	5.09262	0.000175293		2320.44	4.62
Q1/2000	2000-03-31	12359.1	1452.06	1754.67	2342.24	1539.64	1304.26	459626	852.972			2342.24	2342.24	3.8115	3.81155	-5.2034e-05		2342.24	4.41
Q2/2000	2000-06-30	12592.5	1462.49	1769.99	2365.98	1550.62	1319.8	460689	863.44			2365.98	2365.98	4.1158	4.11594	-0.000138806		2365.98	4.43
Q3/2000	2000-09-30	12607.7	1466.82	1782.95	2362.62	1558.99	1333.13	461089	872.812			2362.62	2362.62	-0.5659	-0.566002	0.0001015		2362.62	-0.49
Q4/2000	2000-12-31	12679.3	1469.9	1796.49	2364.43	1583.02	1335.5	465442	882.444			2364.43	2364.43	0.3062	0.306282	-8.20586e-05		2364.43	-0.08
Q1/2001	2001-03-31	12643.3	1484.76	1805	2403.07	1588.8	1342.45	468098	891.252			2403.07	2403.07	6.6982	6.69816	4.06575e-05		2403.07	6
Q2/2001	2001-06-30	12710.3	1497.05	1809.62	2405.13	1584.47	1345.92	465899	898.336			2405.13	2405.13	0.344	0.344004	-3.69589e-06		2405.13	0.45
Q3/2001	2001-09-30	12670.1	1506.68	1814.69	2398.17	1577.76	1344.9	460733	907.276			2398.17	2398.17	-1.1535	-1.1535	-7.51959e-07		2398.17	-1.25
Q4/2001	2001-12-31	12705.3	1511.64	1814.77	2401	1578.53	1353.14	459621	913.708			2401	2401	0.4742	0.474203	-2.65783e-06		2401	0.77
Q1/2002	2002-03-31	12822.3	1518.93	1821.9	2393.59	1577.24	1373.3	460188	918.908			2393.59	2393.59	-1.2301	-1.2301	9.79548e-07		2393.59	-1.36
Q2/2002	2002-06-30	12893	1529.82	1828.73	2399.78	1585	1381.13	463852	925.816			2399.78	2399.78	1.0388	1.03879	1.23872e-05		2399.78	1.14
Q3/2002	2002-09-30	12955.8	1542.14	1835.87	2411.13	1588.4	1393.2	465643	931.416			2411.13	2411.13	1.9057	1.90581	-0.0001127		2411.13	1.55
Q4/2002	2002-12-31	12964	1556.72	1835.34	2405.97	1594.57	1400.91	466856	938.412			2405.97	2405.97	-0.8533	-0.853451	0.000150607		2405.97	-0.77
Q1/2003	2003-03-31	13031.2	1566.39	1838.81	2376.82	1589.8	1408.63	466226	947.672			2376.82	2376.82	-4.7597	-4.75955	-0.000145469		2376.82	-3.08
Q2/2003	2003-06-30	13152.1	1580.58	1835.18	2377.33	1584.79	1406.54	469908	954.108			2377.33	2377.33	0.0869	0.0868671	3.28538e-05		2377.33	-0.33
Q3/2003	2003-09-30	13372.4	1596.34	1848.39	2389.2	1586.61	1411.85	471752	960.656			2389.2	2389.2	2.0119	2.01186	3.68849e-05		2389.2	1.89
Q4/2003	2003-12-31	13528.7	1608.76	1862.05	2397.97	1599.31	1421.53	477025	970.52			2397.97	2397.97	1.4768	1.47689	-8.58691e-05		2397.97	1.64
Q1/2004	2004-03-31	13606.5	1617.1	1879.47	2397.39	1606.7	1431.78	480777	976.416			2397.39	2397.39	-0.0968	-0.09688	7.99699e-05		2397.39	0.04
Q2/2004	2004-06-30	13706.2	1623.92	1889.75	2405.65	1611.92	1448.7	480636	983.992			2405.65	2405.65	1.3846	1.38463	-2.88464e-05		2405.65	1.3
Q3/2004	2004-09-30	13830.8	1627.67	1896.82	2401.26	1613.46	1465.93	483164	993.904			2401.26	2401.26	-0.7273	-0.727292	-8.28013e-06		2401.26	-0.68
Q4/2004	2004-12-31	13950.4	1633.58	1909.64	2403.58	1616.1	1476.45	481890	1000.02			2403.58	2403.58	0.3874	0.387358	4.19852e-05		2403.58	0.12
Q1/2005	2005-03-31	14099.1	1647.41	1914.63	2398.94	1612.07	1481.49	484190	1010.14			2398.94	2398.94	-0.7706	-0.770609	8.92682e-06		2398.94	-0.5
Q2/2005	2005-06-30	14172.7	1665.44	1917.87	2414.94	1627.73	1492.03	487951	1020.43			2414.94	2414.94	2.694	2.69397	2.63176e-05		2414.94	2.61
Q3/2005	2005-09-30	14291.8	1683.02	1927.91	2434.54	1638.59	1510.4	492645	1030.11			2434.54	2434.54	3.2876	3.28756	4.20451e-05		2434.54	3.09
Q4/2005	2005-12-31	14373.4	1707.71	1940.61	2443.83	1643.2	1525.36	493712	1040.88			2443.83	2443.83	1.5349	1.53496	-5.66264e-05		2443.83	1.36
Q1/2006	2006-03-31	14546.1	1712.21	1956.85	2466.6	1649.06	1537.58	494128	1052.15			2466.6	2466.6	3.779	3.77901	-7.53959e-06		2466.6	4.46
Q2/2006	2006-06-30	14589.6	1715.68	1974.53	2506.08	1658.78	1538.32	495921	1063.14			2506.08	2506.08	6.557	6.55684	0.000159047		2506.08	6.11
Q3/2006	2006-09-30	14602.6	1717.04	1975.53	2531.1	1664.66	1542.6	495126	1073.64			2531.1	2531.1	4.0549	4.05501	-0.000113772		2531.1	3.93
Q4/2006	2006-12-31	14716.9	1723.3	1988.98	2564.13	1686.34	1548.42	501133	1083.83			2564.13	2564.13	5.3222	5.3221	9.71816e-05		2564.13	5.32
Q1/2007	2007-03-31	14726	1738.84	2004.55	2574.64	1689.05	1558.43	504822	1094.92			2574.64	2574.64	1.6501	1.65012	-2.48251e-05		2574.64	2.36
Q2/2007	2007-06-30	14838.7	1751.29	2018.99	2593.73	1687.36	1573.47	505473	1103.8			2593.73	2593.73	2.9994	2.99932	8.37452e-05		2593.73	2.32
Q3/2007	2007-09-30	14938.5	1762.89	2026.38	2615.66	1686.74	1580.01	503191	1112.75			2615.66	2615.66	3.4252	3.42529	-8.93413e-05		2615.66	3.37
Q4/2007	2007-12-31	14991.8	1777.06	2031.94	2622.89	1684.24	1582.22	505679	1122.33			2622.89	2622.89	1.1094	1.10931	8.63473e-05		2622.89	1.42
Q1/2008	2008-03-31	14889.5	1781.9	2039.36	2645.92	1702.94	1583.16	507234	1127.45			2645.92	2645.92	3.5583	3.55837	-7.32266e-05		2645.92	4.05
Q2/2008	2008-06-30	14963.4	1769.85	2030.37	2638.69	1686.19	1588.65	504715	1128.08			2638.69	2638.69	-1.0877	-1.08778	8.32851e-05		2638.69	-1.53
Q3/2008	2008-09-30	14891.6	1741.51	2023.85	2629.15	1662.61	1601.9	498221	1119.55			2629.15	2629.15	-1.4393	-1.43925	-5.31375e-05		2629.15	-1.79
Q4/2008	2008-12-31	14577	1703.61	1994.22	2578.32	1624.91	1583.38	486915	1108.28			2578.32	2578.32	-7.5117	-7.51178	7.73739e-05		2578.32	-7.67
Q1/2009	2009-03-31	14375	1676.38	1960.94	2462.67	1580.18	1547.2	463202	1090.55			2462.67	2462.67	-16.7705	-16.7705	-4.39294e-05		2462.67	-15.49
Q2/2009	2009-06-30	14355.6	1672.6	1957.75	2464.47	1567.63	1530.13	472927	1079.99			2464.47	2464.47	0.2937	0.293663	3.66472e-05		2464.47	0.99
Q3/2009	2009-09-30	14402.5	1675.2	1961.94	2479.18	1576.57	1537.05	473008	1076.63			2479.18	2479.18	2.4084	2.40849	-9.42897e-05		2479.18	3.01
Q4/2009	2009-12-31	14541.9	1679.67	1974.07	2501.88	1582.77	1555.21	479778	1075.96			2501.88	2501.88	3.7139	3.71377	0.000125482		2501.88	4.19
Q1/2010	2010-03-31	14604.8	1688.7	1982.87	2520.27	1589.43	1573.74	484054	1079.2			2520.27	2520.27	2.9714	2.97145	-5.35463e-05		2520.27	1.93
Q2/2010	2010-06-30	14745.9	1703.9	1994.54	2571.87	1598.16	1581.83	489994	1081.17			2571.87	2571.87	8.445	8.44491	8.8875e-05		2571.87	8.26
Q3/2010	2010-09-30	14845.5	1711.81	2007.18	2592.77	1606.6	1593.12	498868	1081.69			2592.77	2592.77	3.2902	3.29023	-3.42923e-05		2592.77	3.27
Q4/2010	2010-12-31	14939	1713.04	2018.86	2614.44	1616.91	1611.13	495177	1081.68			2614.44	2614.44	3.3858	3.38577	3.25633e-05		2614.44	3.4
Q1/2011	2011-03-31	14881.3	1723.1	2040.1	2660.62	1621.92	1623.05	487693	1077.78			2660.62	2660.62	7.2551	7.25511	-1.02178e-05		2660.62	6.27
Q2/2011	2011-06-30	14989.6	1725.65	2040.16	2665.27	1622.95	1626.13	485112	1072.61			2665.27	2665.27	0.7001	0.700013	8.72955e-05		2665.27	0.37
Q3/2011	2011-09-30	15021.1	1732.22	2045	2677.91	1613.47	1648.7	496891	1068.25			2677.91	2677.91	1.9109	1.91099	-9.05196e-05		2677.91	1.72
Q4/2011	2011-12-31	15190.3	1735.51	2047.04	2678.43	1598.93	1661.73	496127	1061.92			2678.43	2678.43	0.0771	0.0770973	2.65884e-06		2678.43	0.4
Q1/2012	2012-03-31	15291	1746.73	2048.3	2686.88	1584.89	1662.26	502024	1052.7			2686.88	2686.88	1.2679	1.26792	-2.00284e-05		2686.88	2.67
Q2/2012	2012-06-30	15362.4	1744.87	2046.72	2689.45	1570.37	1667.74	498729	1042.68			2689.45	2689.45	0.3846	0.384643	-4.28946e-05		2689.45	-0.32
Q3/2012	2012-09-30	15380.8	1764.95	2048.87	2695.65	1563.29	1671.03	496758	1034.98			2695.65	2695.65	0.9241	0.924115	-1.53821e-05		2695.65	0.79
Q4/2012	2012-12-31	15384.3	1762.39	2047.14	2683.52	1554.57	1673.07	497703	1024.87			2683.52	2683.52	-1.7873	-1.78739	8.69878e-05		2683.52	-1.82
Q1/2013	2013-03-31	15491.9	1773.64	2047.28	2677.59	1538.62	1690.31	503562	1021.35			2677.59	2677.59	-0.8816	-0.88158	-1.96215e-05		2677.59	0.02
Q2/2013	2013-06-30	15521.6	1783.23	2061.51	2701.32	1538.76	1701.27	507915	1020.5			2701.32	2701.32	3.5934	3.59346	-6.29227e-05		2701.32	2.92
Q3/2013	2013-09-30	15641.3	1798.4	2061.26	2715	1543.93	1715.21	511874	1019.8			2715	2715	2.0403	2.04021	8.83313e-05		2715	1.3
Q4/2013	2013-12-31	15793.9	1807.73	2070.43	2726.09	1542.08	1732.5	511771	1022.71			2726.09	2726.09	1.6446	1.64467	-7.1587e-05		2726.09	1.54
Q1/2014	2014-03-31	15757.6	1823.26	2071.76	2750.09	1542.54	1734.65	516894	1026.75			2750.09	2750.09	3.5675	3.5674	0.000101449		2750.09	2.66
Q2/2014	2014-06-30	15935.8	1838.81	2075.78	2745.44	1541.45	1755.45	507655	1030.72			2745.44	2745.44	-0.6738	-0.673761	-3.92622e-05		2745.44	1.59
Q3/2014	2014-09-30	16139.5	1852.8	2087.15	2754.21	1544.69	1768.23	507539	1037.73			2754.21	2754.21	1.2842	1.28418	1.61153e-05		2754.21	1.77
Q4/2014	2014-12-31	16220.2	1866.91	2087.45	2778.72	1545.95	1776.26	510661	1045.52			2778.72	2778.72	3.6075	3.60744	6.49313e-05		2778.72	2.01
Q1/2015	2015-03-31	16350	1873.3	2096.06	2781.82	1549.98	1772.71	517967	1056.52			2781.82	2781.82	0.4465	0.446562	-6.20112e-05		2781.82	2.1
Q2/2015	2015-06-30	16460.9	1884.07	2095.51	2794.2	1555.38	1770.14	517771	1065.48			2794.2	2794.2	1.7926	1.79263	-3.03092e-05		2794.2	2.18
Q3/2015	2015-09-30	16527.6	1891.92	2103.87	2803.24	1558.71	1780.15	518152	1075.49			2803.24	2803.24	1.299	1.29896	4.48262e-05		2803.24	2.26
Q4/2015	2015-12-31	16547.6	1905.65	2108.2	2815.1	1561.72	1782	516513	1085.36			2815.1	2815.1	1.7043	1.7044	-0.000101333		2815.1	2.31
Q1/2016	2016-03-31	16571.6	1909.68	2120.56	2832.91	1566.54	1792.99	520713	1093.49			2832.91	2832.91	2.5537	2.55359	0.000106813
Q2/2016	2016-06-30	16663.5	1918.77	2118.79	2846.06	1568.44	1788.29	522092	1102.1			2846.06	2846.06	1.8709	1.87086	3.57151e-05
Q3/2016	2016-09-30	16778.1	1929.15	2122.97	2855.61	1572.25	1807.09	523073	1109.96			2855.61	2855.61	1.3484	1.34841	-7.47431e-06
Q4/2016	2016-12-31	16851.4	1943.59	2134.46	2867.48	1579.08	1817.12	524307	1117.54			2867.48	2867.48	1.6728	1.67295	-0.000146007
Q1/2017	2017-03-31	16903.2	1949.69	2151.81	2893.28	1586.55	1835.09	527715	1126.32			2893.28	2893.28	3.648	3.64784	0.000155375
Q2/2017	2017-06-30	17031.1	1954.5	2166.99	2911.6	1593.49	1854.82	530360	1136.06			2911.6	2911.6	2.5567	2.55678	-8.31667e-05
Q3/2017	2017-09-30	17163.9	1963.5	2179.7	2933.01	1600.03	1861.93	533051	1143.97			2933.01	2933.01	2.9746	2.9745	9.57521e-05
Q4/2017	2017-12-31	17286.5	1971.14	2195.35	2950.82	1605.1	1869.86	533804	1151.71			2950.82	2950.82	2.4501	2.45014	-4.33675e-05
Q1/2018	2018-03-31	17385.8	1973.08	2200.91	2960.49	1610.37	1877.68	532975	1159.98			2960.49	2960.49	1.3183	1.31824	5.98843e-05
Q2/2018	2018-06-30	17525.5	1983.79	2207.78	2976.7	1616.77	1888.2	536845	1167.7			2976.7	2976.7	2.2072	2.20727	-6.91178e-05
Q3/2018	2018-09-30	17652	1992.26	2219.22	2992.78	1621.71	1900.28	539351	1175.49			2992.78	2992.78	2.1783	2.17836	-5.75738e-05
Q4/2018	2018-12-31	17775.2	1998.75	2230.82	3008.65	1627.15	1911.11	540748	1182.81			3008.65	3008.65	2.1383	2.13831	-1.12721e-05
Q1/2019	2019-03-31	17895.8	2004.37	2241.68	3024.43	1631.52	1921.37	542156	1189.43			3024.43	3024.43	2.115	2.11492	7.87768e-05
Q2/2019	2019-06-30	18013.2	2010.13	2252.24	3040.34	1635.38	1931.65	543550	1195.91			3040.34	3040.34	2.1204	2.12046	-5.7076e-05
Q3/2019	2019-09-30	18131.2	2015.92	2262.43	3056.39	1639.26	1941.83	546514	1202.43			3056.39	3056.39	2.1288	2.12879	1.12444e-05
Q4/2019	2019-12-31	18250.6	2021.76	2272.52	3072.32	1643.16	1952.01	543775	1208.94			3072.32	3072.32	2.1015	2.10157	-6.71363e-05
