# Supplementary material for: Modeling time-variation over the business cycle (1960–2017): an international perspective
Source: publisher site journal article supplement (doi:10.1515/snde-2017-0101), 2018-11-22
Supplement: Supplementary file 17 [file G8data.7.1.2018_GDP_By_Industry.xlsx]

## Sheet: README
Modeling Time-Variation Over the Business Cycle (1960-2017): An International Perspective
Enrique Martinez-Garcia
Federal Reserve Bank of Dallas and SMU
emg.economics@gmail.com
Date: 10/1/2018

## Sheet: US (Quarterly)
Q1/1960 !Q	.excel_last	S111GAFC@G10	S111GQC@G10	S111GEC@G10	S111GCOC@G10	S111GMC@G10	S111GWC@G10	S111GRC@G10	S111GTOC@G10	S111GIJC@G10	S111GFBC@G10	S111GBC@G10	S111GDHC@G10	S111GCFC@G10	S111GOC@G10	S111GGC@G10
.DESC		U.S.: Real Value Added: Agriculture/Forestry/Fishing/Hunting (SA, Bil.Chn.2009$)	U.S.: Real Value Added: Mining (SA, Bil.Chn.2009$)	U.S.: Real Value Added: Utilities (SA, Bil.Chn.2009$)	U.S.: Real Value Added: Construction (SA, Bil.Chn.2009$)	U.S.: Real Value Added: Manufacturing (SA, Bil.Chn.2009$)	U.S.: Real Value Added: Wholesale Trade (SA, Bil.Chn.2009$)	U.S.: Real Value Added: Retail Trade (SA, Bil.Chn.2009$)	U.S.: Real Value Added: Transportation and Warehousing (SA, Bil.Chn.2009$)	U.S.: Real Value Added: Information (SA, Bil.Chn.2009$)	U.S.: Real Value Added: Finance/Insur/RE/Rental/Leasing (SA, Bil.Chn.2009$)	U.S.: Real Value Added: Professional and Business Services (SA, Bil.Chn.2009$)	U.S.: Real Value Added: Edu Svc/Health Care/Social Assistance(SA, Bil.Chn.2009$)	U.S.: Real Value Added: Arts/Entertainmt/Recr/Accomm/Food Svc(SA, Bil.Chn.2009$)	U.S.: Real Value Added: Other Services, Except Government (SA, Bil.Chn.2009$)	U.S.: Real Value Added: Government (SA, Bil.Chn.2009$)
.T1		Q1-2005	Q1-2005	Q1-2005	Q1-2005	Q1-2005	Q1-2005	Q1-2005	Q1-2005	Q1-2005	Q1-2005	Q1-2005	Q1-2005	Q1-2005	Q1-2005	Q1-2005
.TN		Q1-2018	Q1-2018	Q1-2018	Q1-2018	Q1-2018	Q1-2018	Q1-2018	Q1-2018	Q1-2018	Q1-2018	Q1-2018	Q1-2018	Q1-2018	Q1-2018	Q1-2018
.LSOURCE		Bureau of Economic Analysis	Bureau of Economic Analysis	Bureau of Economic Analysis	Bureau of Economic Analysis	Bureau of Economic Analysis	Bureau of Economic Analysis	Bureau of Economic Analysis	Bureau of Economic Analysis	Bureau of Economic Analysis	Bureau of Economic Analysis	Bureau of Economic Analysis	Bureau of Economic Analysis	Bureau of Economic Analysis	Bureau of Economic Analysis	Bureau of Economic Analysis
.AGG		Sum	Sum	Sum	Sum	Sum	Sum	Sum	Sum	Sum	Sum	Sum	Sum	Sum	Sum	Sum
.DTLM		Jul-20-2018 07:47	Jul-20-2018 07:47	Jul-20-2018 07:47	Jul-20-2018 07:47	Jul-20-2018 07:47	Jul-20-2018 07:47	Jul-20-2018 07:47	Jul-20-2018 07:47	Jul-20-2018 07:47	Jul-20-2018 07:47	Jul-20-2018 07:47	Jul-20-2018 07:47	Jul-20-2018 07:47	Jul-20-2018 07:47	Jul-20-2018 07:47			FINAL SERIES
.FRQ		Quarterly	Quarterly	Quarterly	Quarterly	Quarterly	Quarterly	Quarterly	Quarterly	Quarterly	Quarterly	Quarterly	Quarterly	Quarterly	Quarterly	Quarterly			PRIMARY	SECONDARY	CONSTRUCTION	TERTIARY (including Government)
Q1/1960	1960-03-31	#N/A	#N/A	#N/A	#N/A	#N/A	#N/A	#N/A	#N/A	#N/A	#N/A	#N/A	#N/A	#N/A	#N/A	#N/A		Q1/1960	#N/A	#N/A	#N/A	#N/A
Q2/1960	1960-06-30	#N/A	#N/A	#N/A	#N/A	#N/A	#N/A	#N/A	#N/A	#N/A	#N/A	#N/A	#N/A	#N/A	#N/A	#N/A		Q2/1960	#N/A	#N/A	#N/A	#N/A
Q3/1960	1960-09-30	#N/A	#N/A	#N/A	#N/A	#N/A	#N/A	#N/A	#N/A	#N/A	#N/A	#N/A	#N/A	#N/A	#N/A	#N/A		Q3/1960	#N/A	#N/A	#N/A	#N/A
Q4/1960	1960-12-31	#N/A	#N/A	#N/A	#N/A	#N/A	#N/A	#N/A	#N/A	#N/A	#N/A	#N/A	#N/A	#N/A	#N/A	#N/A		Q4/1960	#N/A	#N/A	#N/A	#N/A
Q1/1961	1961-03-31	#N/A	#N/A	#N/A	#N/A	#N/A	#N/A	#N/A	#N/A	#N/A	#N/A	#N/A	#N/A	#N/A	#N/A	#N/A		Q1/1961	#N/A	#N/A	#N/A	#N/A
Q2/1961	1961-06-30	#N/A	#N/A	#N/A	#N/A	#N/A	#N/A	#N/A	#N/A	#N/A	#N/A	#N/A	#N/A	#N/A	#N/A	#N/A		Q2/1961	#N/A	#N/A	#N/A	#N/A
Q3/1961	1961-09-30	#N/A	#N/A	#N/A	#N/A	#N/A	#N/A	#N/A	#N/A	#N/A	#N/A	#N/A	#N/A	#N/A	#N/A	#N/A		Q3/1961	#N/A	#N/A	#N/A	#N/A
Q4/1961	1961-12-31	#N/A	#N/A	#N/A	#N/A	#N/A	#N/A	#N/A	#N/A	#N/A	#N/A	#N/A	#N/A	#N/A	#N/A	#N/A		Q4/1961	#N/A	#N/A	#N/A	#N/A
Q1/1962	1962-03-31	#N/A	#N/A	#N/A	#N/A	#N/A	#N/A	#N/A	#N/A	#N/A	#N/A	#N/A	#N/A	#N/A	#N/A	#N/A		Q1/1962	#N/A	#N/A	#N/A	#N/A
Q2/1962	1962-06-30	#N/A	#N/A	#N/A	#N/A	#N/A	#N/A	#N/A	#N/A	#N/A	#N/A	#N/A	#N/A	#N/A	#N/A	#N/A		Q2/1962	#N/A	#N/A	#N/A	#N/A
Q3/1962	1962-09-30	#N/A	#N/A	#N/A	#N/A	#N/A	#N/A	#N/A	#N/A	#N/A	#N/A	#N/A	#N/A	#N/A	#N/A	#N/A		Q3/1962	#N/A	#N/A	#N/A	#N/A
Q4/1962	1962-12-31	#N/A	#N/A	#N/A	#N/A	#N/A	#N/A	#N/A	#N/A	#N/A	#N/A	#N/A	#N/A	#N/A	#N/A	#N/A		Q4/1962	#N/A	#N/A	#N/A	#N/A
Q1/1963	1963-03-31	#N/A	#N/A	#N/A	#N/A	#N/A	#N/A	#N/A	#N/A	#N/A	#N/A	#N/A	#N/A	#N/A	#N/A	#N/A		Q1/1963	#N/A	#N/A	#N/A	#N/A
Q2/1963	1963-06-30	#N/A	#N/A	#N/A	#N/A	#N/A	#N/A	#N/A	#N/A	#N/A	#N/A	#N/A	#N/A	#N/A	#N/A	#N/A		Q2/1963	#N/A	#N/A	#N/A	#N/A
Q3/1963	1963-09-30	#N/A	#N/A	#N/A	#N/A	#N/A	#N/A	#N/A	#N/A	#N/A	#N/A	#N/A	#N/A	#N/A	#N/A	#N/A		Q3/1963	#N/A	#N/A	#N/A	#N/A
Q4/1963	1963-12-31	#N/A	#N/A	#N/A	#N/A	#N/A	#N/A	#N/A	#N/A	#N/A	#N/A	#N/A	#N/A	#N/A	#N/A	#N/A		Q4/1963	#N/A	#N/A	#N/A	#N/A
Q1/1964	1964-03-31	#N/A	#N/A	#N/A	#N/A	#N/A	#N/A	#N/A	#N/A	#N/A	#N/A	#N/A	#N/A	#N/A	#N/A	#N/A		Q1/1964	#N/A	#N/A	#N/A	#N/A
Q2/1964	1964-06-30	#N/A	#N/A	#N/A	#N/A	#N/A	#N/A	#N/A	#N/A	#N/A	#N/A	#N/A	#N/A	#N/A	#N/A	#N/A		Q2/1964	#N/A	#N/A	#N/A	#N/A
Q3/1964	1964-09-30	#N/A	#N/A	#N/A	#N/A	#N/A	#N/A	#N/A	#N/A	#N/A	#N/A	#N/A	#N/A	#N/A	#N/A	#N/A		Q3/1964	#N/A	#N/A	#N/A	#N/A
Q4/1964	1964-12-31	#N/A	#N/A	#N/A	#N/A	#N/A	#N/A	#N/A	#N/A	#N/A	#N/A	#N/A	#N/A	#N/A	#N/A	#N/A		Q4/1964	#N/A	#N/A	#N/A	#N/A
Q1/1965	1965-03-31	#N/A	#N/A	#N/A	#N/A	#N/A	#N/A	#N/A	#N/A	#N/A	#N/A	#N/A	#N/A	#N/A	#N/A	#N/A		Q1/1965	#N/A	#N/A	#N/A	#N/A
Q2/1965	1965-06-30	#N/A	#N/A	#N/A	#N/A	#N/A	#N/A	#N/A	#N/A	#N/A	#N/A	#N/A	#N/A	#N/A	#N/A	#N/A		Q2/1965	#N/A	#N/A	#N/A	#N/A
Q3/1965	1965-09-30	#N/A	#N/A	#N/A	#N/A	#N/A	#N/A	#N/A	#N/A	#N/A	#N/A	#N/A	#N/A	#N/A	#N/A	#N/A		Q3/1965	#N/A	#N/A	#N/A	#N/A
Q4/1965	1965-12-31	#N/A	#N/A	#N/A	#N/A	#N/A	#N/A	#N/A	#N/A	#N/A	#N/A	#N/A	#N/A	#N/A	#N/A	#N/A		Q4/1965	#N/A	#N/A	#N/A	#N/A
Q1/1966	1966-03-31	#N/A	#N/A	#N/A	#N/A	#N/A	#N/A	#N/A	#N/A	#N/A	#N/A	#N/A	#N/A	#N/A	#N/A	#N/A		Q1/1966	#N/A	#N/A	#N/A	#N/A
Q2/1966	1966-06-30	#N/A	#N/A	#N/A	#N/A	#N/A	#N/A	#N/A	#N/A	#N/A	#N/A	#N/A	#N/A	#N/A	#N/A	#N/A		Q2/1966	#N/A	#N/A	#N/A	#N/A
Q3/1966	1966-09-30	#N/A	#N/A	#N/A	#N/A	#N/A	#N/A	#N/A	#N/A	#N/A	#N/A	#N/A	#N/A	#N/A	#N/A	#N/A		Q3/1966	#N/A	#N/A	#N/A	#N/A
Q4/1966	1966-12-31	#N/A	#N/A	#N/A	#N/A	#N/A	#N/A	#N/A	#N/A	#N/A	#N/A	#N/A	#N/A	#N/A	#N/A	#N/A		Q4/1966	#N/A	#N/A	#N/A	#N/A
Q1/1967	1967-03-31	#N/A	#N/A	#N/A	#N/A	#N/A	#N/A	#N/A	#N/A	#N/A	#N/A	#N/A	#N/A	#N/A	#N/A	#N/A		Q1/1967	#N/A	#N/A	#N/A	#N/A
Q2/1967	1967-06-30	#N/A	#N/A	#N/A	#N/A	#N/A	#N/A	#N/A	#N/A	#N/A	#N/A	#N/A	#N/A	#N/A	#N/A	#N/A		Q2/1967	#N/A	#N/A	#N/A	#N/A
Q3/1967	1967-09-30	#N/A	#N/A	#N/A	#N/A	#N/A	#N/A	#N/A	#N/A	#N/A	#N/A	#N/A	#N/A	#N/A	#N/A	#N/A		Q3/1967	#N/A	#N/A	#N/A	#N/A
Q4/1967	1967-12-31	#N/A	#N/A	#N/A	#N/A	#N/A	#N/A	#N/A	#N/A	#N/A	#N/A	#N/A	#N/A	#N/A	#N/A	#N/A		Q4/1967	#N/A	#N/A	#N/A	#N/A
Q1/1968	1968-03-31	#N/A	#N/A	#N/A	#N/A	#N/A	#N/A	#N/A	#N/A	#N/A	#N/A	#N/A	#N/A	#N/A	#N/A	#N/A		Q1/1968	#N/A	#N/A	#N/A	#N/A
Q2/1968	1968-06-30	#N/A	#N/A	#N/A	#N/A	#N/A	#N/A	#N/A	#N/A	#N/A	#N/A	#N/A	#N/A	#N/A	#N/A	#N/A		Q2/1968	#N/A	#N/A	#N/A	#N/A
Q3/1968	1968-09-30	#N/A	#N/A	#N/A	#N/A	#N/A	#N/A	#N/A	#N/A	#N/A	#N/A	#N/A	#N/A	#N/A	#N/A	#N/A		Q3/1968	#N/A	#N/A	#N/A	#N/A
Q4/1968	1968-12-31	#N/A	#N/A	#N/A	#N/A	#N/A	#N/A	#N/A	#N/A	#N/A	#N/A	#N/A	#N/A	#N/A	#N/A	#N/A		Q4/1968	#N/A	#N/A	#N/A	#N/A
Q1/1969	1969-03-31	#N/A	#N/A	#N/A	#N/A	#N/A	#N/A	#N/A	#N/A	#N/A	#N/A	#N/A	#N/A	#N/A	#N/A	#N/A		Q1/1969	#N/A	#N/A	#N/A	#N/A
Q2/1969	1969-06-30	#N/A	#N/A	#N/A	#N/A	#N/A	#N/A	#N/A	#N/A	#N/A	#N/A	#N/A	#N/A	#N/A	#N/A	#N/A		Q2/1969	#N/A	#N/A	#N/A	#N/A
Q3/1969	1969-09-30	#N/A	#N/A	#N/A	#N/A	#N/A	#N/A	#N/A	#N/A	#N/A	#N/A	#N/A	#N/A	#N/A	#N/A	#N/A		Q3/1969	#N/A	#N/A	#N/A	#N/A
Q4/1969	1969-12-31	#N/A	#N/A	#N/A	#N/A	#N/A	#N/A	#N/A	#N/A	#N/A	#N/A	#N/A	#N/A	#N/A	#N/A	#N/A		Q4/1969	#N/A	#N/A	#N/A	#N/A
Q1/1970	1970-03-31	#N/A	#N/A	#N/A	#N/A	#N/A	#N/A	#N/A	#N/A	#N/A	#N/A	#N/A	#N/A	#N/A	#N/A	#N/A		Q1/1970	#N/A	#N/A	#N/A	#N/A
Q2/1970	1970-06-30	#N/A	#N/A	#N/A	#N/A	#N/A	#N/A	#N/A	#N/A	#N/A	#N/A	#N/A	#N/A	#N/A	#N/A	#N/A		Q2/1970	#N/A	#N/A	#N/A	#N/A
Q3/1970	1970-09-30	#N/A	#N/A	#N/A	#N/A	#N/A	#N/A	#N/A	#N/A	#N/A	#N/A	#N/A	#N/A	#N/A	#N/A	#N/A		Q3/1970	#N/A	#N/A	#N/A	#N/A
Q4/1970	1970-12-31	#N/A	#N/A	#N/A	#N/A	#N/A	#N/A	#N/A	#N/A	#N/A	#N/A	#N/A	#N/A	#N/A	#N/A	#N/A		Q4/1970	#N/A	#N/A	#N/A	#N/A
Q1/1971	1971-03-31	#N/A	#N/A	#N/A	#N/A	#N/A	#N/A	#N/A	#N/A	#N/A	#N/A	#N/A	#N/A	#N/A	#N/A	#N/A		Q1/1971	#N/A	#N/A	#N/A	#N/A
Q2/1971	1971-06-30	#N/A	#N/A	#N/A	#N/A	#N/A	#N/A	#N/A	#N/A	#N/A	#N/A	#N/A	#N/A	#N/A	#N/A	#N/A		Q2/1971	#N/A	#N/A	#N/A	#N/A
Q3/1971	1971-09-30	#N/A	#N/A	#N/A	#N/A	#N/A	#N/A	#N/A	#N/A	#N/A	#N/A	#N/A	#N/A	#N/A	#N/A	#N/A		Q3/1971	#N/A	#N/A	#N/A	#N/A
Q4/1971	1971-12-31	#N/A	#N/A	#N/A	#N/A	#N/A	#N/A	#N/A	#N/A	#N/A	#N/A	#N/A	#N/A	#N/A	#N/A	#N/A		Q4/1971	#N/A	#N/A	#N/A	#N/A
Q1/1972	1972-03-31	#N/A	#N/A	#N/A	#N/A	#N/A	#N/A	#N/A	#N/A	#N/A	#N/A	#N/A	#N/A	#N/A	#N/A	#N/A		Q1/1972	#N/A	#N/A	#N/A	#N/A
Q2/1972	1972-06-30	#N/A	#N/A	#N/A	#N/A	#N/A	#N/A	#N/A	#N/A	#N/A	#N/A	#N/A	#N/A	#N/A	#N/A	#N/A		Q2/1972	#N/A	#N/A	#N/A	#N/A
Q3/1972	1972-09-30	#N/A	#N/A	#N/A	#N/A	#N/A	#N/A	#N/A	#N/A	#N/A	#N/A	#N/A	#N/A	#N/A	#N/A	#N/A		Q3/1972	#N/A	#N/A	#N/A	#N/A
Q4/1972	1972-12-31	#N/A	#N/A	#N/A	#N/A	#N/A	#N/A	#N/A	#N/A	#N/A	#N/A	#N/A	#N/A	#N/A	#N/A	#N/A		Q4/1972	#N/A	#N/A	#N/A	#N/A
Q1/1973	1973-03-31	#N/A	#N/A	#N/A	#N/A	#N/A	#N/A	#N/A	#N/A	#N/A	#N/A	#N/A	#N/A	#N/A	#N/A	#N/A		Q1/1973	#N/A	#N/A	#N/A	#N/A
Q2/1973	1973-06-30	#N/A	#N/A	#N/A	#N/A	#N/A	#N/A	#N/A	#N/A	#N/A	#N/A	#N/A	#N/A	#N/A	#N/A	#N/A		Q2/1973	#N/A	#N/A	#N/A	#N/A
Q3/1973	1973-09-30	#N/A	#N/A	#N/A	#N/A	#N/A	#N/A	#N/A	#N/A	#N/A	#N/A	#N/A	#N/A	#N/A	#N/A	#N/A		Q3/1973	#N/A	#N/A	#N/A	#N/A
Q4/1973	1973-12-31	#N/A	#N/A	#N/A	#N/A	#N/A	#N/A	#N/A	#N/A	#N/A	#N/A	#N/A	#N/A	#N/A	#N/A	#N/A		Q4/1973	#N/A	#N/A	#N/A	#N/A
Q1/1974	1974-03-31	#N/A	#N/A	#N/A	#N/A	#N/A	#N/A	#N/A	#N/A	#N/A	#N/A	#N/A	#N/A	#N/A	#N/A	#N/A		Q1/1974	#N/A	#N/A	#N/A	#N/A
Q2/1974	1974-06-30	#N/A	#N/A	#N/A	#N/A	#N/A	#N/A	#N/A	#N/A	#N/A	#N/A	#N/A	#N/A	#N/A	#N/A	#N/A		Q2/1974	#N/A	#N/A	#N/A	#N/A
Q3/1974	1974-09-30	#N/A	#N/A	#N/A	#N/A	#N/A	#N/A	#N/A	#N/A	#N/A	#N/A	#N/A	#N/A	#N/A	#N/A	#N/A		Q3/1974	#N/A	#N/A	#N/A	#N/A
Q4/1974	1974-12-31	#N/A	#N/A	#N/A	#N/A	#N/A	#N/A	#N/A	#N/A	#N/A	#N/A	#N/A	#N/A	#N/A	#N/A	#N/A		Q4/1974	#N/A	#N/A	#N/A	#N/A
Q1/1975	1975-03-31	#N/A	#N/A	#N/A	#N/A	#N/A	#N/A	#N/A	#N/A	#N/A	#N/A	#N/A	#N/A	#N/A	#N/A	#N/A		Q1/1975	#N/A	#N/A	#N/A	#N/A
Q2/1975	1975-06-30	#N/A	#N/A	#N/A	#N/A	#N/A	#N/A	#N/A	#N/A	#N/A	#N/A	#N/A	#N/A	#N/A	#N/A	#N/A		Q2/1975	#N/A	#N/A	#N/A	#N/A
Q3/1975	1975-09-30	#N/A	#N/A	#N/A	#N/A	#N/A	#N/A	#N/A	#N/A	#N/A	#N/A	#N/A	#N/A	#N/A	#N/A	#N/A		Q3/1975	#N/A	#N/A	#N/A	#N/A
Q4/1975	1975-12-31	#N/A	#N/A	#N/A	#N/A	#N/A	#N/A	#N/A	#N/A	#N/A	#N/A	#N/A	#N/A	#N/A	#N/A	#N/A		Q4/1975	#N/A	#N/A	#N/A	#N/A
Q1/1976	1976-03-31	#N/A	#N/A	#N/A	#N/A	#N/A	#N/A	#N/A	#N/A	#N/A	#N/A	#N/A	#N/A	#N/A	#N/A	#N/A		Q1/1976	#N/A	#N/A	#N/A	#N/A
Q2/1976	1976-06-30	#N/A	#N/A	#N/A	#N/A	#N/A	#N/A	#N/A	#N/A	#N/A	#N/A	#N/A	#N/A	#N/A	#N/A	#N/A		Q2/1976	#N/A	#N/A	#N/A	#N/A
Q3/1976	1976-09-30	#N/A	#N/A	#N/A	#N/A	#N/A	#N/A	#N/A	#N/A	#N/A	#N/A	#N/A	#N/A	#N/A	#N/A	#N/A		Q3/1976	#N/A	#N/A	#N/A	#N/A
Q4/1976	1976-12-31	#N/A	#N/A	#N/A	#N/A	#N/A	#N/A	#N/A	#N/A	#N/A	#N/A	#N/A	#N/A	#N/A	#N/A	#N/A		Q4/1976	#N/A	#N/A	#N/A	#N/A
Q1/1977	1977-03-31	#N/A	#N/A	#N/A	#N/A	#N/A	#N/A	#N/A	#N/A	#N/A	#N/A	#N/A	#N/A	#N/A	#N/A	#N/A		Q1/1977	#N/A	#N/A	#N/A	#N/A
Q2/1977	1977-06-30	#N/A	#N/A	#N/A	#N/A	#N/A	#N/A	#N/A	#N/A	#N/A	#N/A	#N/A	#N/A	#N/A	#N/A	#N/A		Q2/1977	#N/A	#N/A	#N/A	#N/A
Q3/1977	1977-09-30	#N/A	#N/A	#N/A	#N/A	#N/A	#N/A	#N/A	#N/A	#N/A	#N/A	#N/A	#N/A	#N/A	#N/A	#N/A		Q3/1977	#N/A	#N/A	#N/A	#N/A
Q4/1977	1977-12-31	#N/A	#N/A	#N/A	#N/A	#N/A	#N/A	#N/A	#N/A	#N/A	#N/A	#N/A	#N/A	#N/A	#N/A	#N/A		Q4/1977	#N/A	#N/A	#N/A	#N/A
Q1/1978	1978-03-31	#N/A	#N/A	#N/A	#N/A	#N/A	#N/A	#N/A	#N/A	#N/A	#N/A	#N/A	#N/A	#N/A	#N/A	#N/A		Q1/1978	#N/A	#N/A	#N/A	#N/A
Q2/1978	1978-06-30	#N/A	#N/A	#N/A	#N/A	#N/A	#N/A	#N/A	#N/A	#N/A	#N/A	#N/A	#N/A	#N/A	#N/A	#N/A		Q2/1978	#N/A	#N/A	#N/A	#N/A
Q3/1978	1978-09-30	#N/A	#N/A	#N/A	#N/A	#N/A	#N/A	#N/A	#N/A	#N/A	#N/A	#N/A	#N/A	#N/A	#N/A	#N/A		Q3/1978	#N/A	#N/A	#N/A	#N/A
Q4/1978	1978-12-31	#N/A	#N/A	#N/A	#N/A	#N/A	#N/A	#N/A	#N/A	#N/A	#N/A	#N/A	#N/A	#N/A	#N/A	#N/A		Q4/1978	#N/A	#N/A	#N/A	#N/A
Q1/1979	1979-03-31	#N/A	#N/A	#N/A	#N/A	#N/A	#N/A	#N/A	#N/A	#N/A	#N/A	#N/A	#N/A	#N/A	#N/A	#N/A		Q1/1979	#N/A	#N/A	#N/A	#N/A
Q2/1979	1979-06-30	#N/A	#N/A	#N/A	#N/A	#N/A	#N/A	#N/A	#N/A	#N/A	#N/A	#N/A	#N/A	#N/A	#N/A	#N/A		Q2/1979	#N/A	#N/A	#N/A	#N/A
Q3/1979	1979-09-30	#N/A	#N/A	#N/A	#N/A	#N/A	#N/A	#N/A	#N/A	#N/A	#N/A	#N/A	#N/A	#N/A	#N/A	#N/A		Q3/1979	#N/A	#N/A	#N/A	#N/A
Q4/1979	1979-12-31	#N/A	#N/A	#N/A	#N/A	#N/A	#N/A	#N/A	#N/A	#N/A	#N/A	#N/A	#N/A	#N/A	#N/A	#N/A		Q4/1979	#N/A	#N/A	#N/A	#N/A
Q1/1980	1980-03-31	#N/A	#N/A	#N/A	#N/A	#N/A	#N/A	#N/A	#N/A	#N/A	#N/A	#N/A	#N/A	#N/A	#N/A	#N/A		Q1/1980	#N/A	#N/A	#N/A	#N/A
Q2/1980	1980-06-30	#N/A	#N/A	#N/A	#N/A	#N/A	#N/A	#N/A	#N/A	#N/A	#N/A	#N/A	#N/A	#N/A	#N/A	#N/A		Q2/1980	#N/A	#N/A	#N/A	#N/A
Q3/1980	1980-09-30	#N/A	#N/A	#N/A	#N/A	#N/A	#N/A	#N/A	#N/A	#N/A	#N/A	#N/A	#N/A	#N/A	#N/A	#N/A		Q3/1980	#N/A	#N/A	#N/A	#N/A
Q4/1980	1980-12-31	#N/A	#N/A	#N/A	#N/A	#N/A	#N/A	#N/A	#N/A	#N/A	#N/A	#N/A	#N/A	#N/A	#N/A	#N/A		Q4/1980	#N/A	#N/A	#N/A	#N/A
Q1/1981	1981-03-31	#N/A	#N/A	#N/A	#N/A	#N/A	#N/A	#N/A	#N/A	#N/A	#N/A	#N/A	#N/A	#N/A	#N/A	#N/A		Q1/1981	#N/A	#N/A	#N/A	#N/A
Q2/1981	1981-06-30	#N/A	#N/A	#N/A	#N/A	#N/A	#N/A	#N/A	#N/A	#N/A	#N/A	#N/A	#N/A	#N/A	#N/A	#N/A		Q2/1981	#N/A	#N/A	#N/A	#N/A
Q3/1981	1981-09-30	#N/A	#N/A	#N/A	#N/A	#N/A	#N/A	#N/A	#N/A	#N/A	#N/A	#N/A	#N/A	#N/A	#N/A	#N/A		Q3/1981	#N/A	#N/A	#N/A	#N/A
Q4/1981	1981-12-31	#N/A	#N/A	#N/A	#N/A	#N/A	#N/A	#N/A	#N/A	#N/A	#N/A	#N/A	#N/A	#N/A	#N/A	#N/A		Q4/1981	#N/A	#N/A	#N/A	#N/A
Q1/1982	1982-03-31	#N/A	#N/A	#N/A	#N/A	#N/A	#N/A	#N/A	#N/A	#N/A	#N/A	#N/A	#N/A	#N/A	#N/A	#N/A		Q1/1982	#N/A	#N/A	#N/A	#N/A
Q2/1982	1982-06-30	#N/A	#N/A	#N/A	#N/A	#N/A	#N/A	#N/A	#N/A	#N/A	#N/A	#N/A	#N/A	#N/A	#N/A	#N/A		Q2/1982	#N/A	#N/A	#N/A	#N/A
Q3/1982	1982-09-30	#N/A	#N/A	#N/A	#N/A	#N/A	#N/A	#N/A	#N/A	#N/A	#N/A	#N/A	#N/A	#N/A	#N/A	#N/A		Q3/1982	#N/A	#N/A	#N/A	#N/A
Q4/1982	1982-12-31	#N/A	#N/A	#N/A	#N/A	#N/A	#N/A	#N/A	#N/A	#N/A	#N/A	#N/A	#N/A	#N/A	#N/A	#N/A		Q4/1982	#N/A	#N/A	#N/A	#N/A
Q1/1983	1983-03-31	#N/A	#N/A	#N/A	#N/A	#N/A	#N/A	#N/A	#N/A	#N/A	#N/A	#N/A	#N/A	#N/A	#N/A	#N/A		Q1/1983	#N/A	#N/A	#N/A	#N/A
Q2/1983	1983-06-30	#N/A	#N/A	#N/A	#N/A	#N/A	#N/A	#N/A	#N/A	#N/A	#N/A	#N/A	#N/A	#N/A	#N/A	#N/A		Q2/1983	#N/A	#N/A	#N/A	#N/A
Q3/1983	1983-09-30	#N/A	#N/A	#N/A	#N/A	#N/A	#N/A	#N/A	#N/A	#N/A	#N/A	#N/A	#N/A	#N/A	#N/A	#N/A		Q3/1983	#N/A	#N/A	#N/A	#N/A
Q4/1983	1983-12-31	#N/A	#N/A	#N/A	#N/A	#N/A	#N/A	#N/A	#N/A	#N/A	#N/A	#N/A	#N/A	#N/A	#N/A	#N/A		Q4/1983	#N/A	#N/A	#N/A	#N/A
Q1/1984	1984-03-31	#N/A	#N/A	#N/A	#N/A	#N/A	#N/A	#N/A	#N/A	#N/A	#N/A	#N/A	#N/A	#N/A	#N/A	#N/A		Q1/1984	#N/A	#N/A	#N/A	#N/A
Q2/1984	1984-06-30	#N/A	#N/A	#N/A	#N/A	#N/A	#N/A	#N/A	#N/A	#N/A	#N/A	#N/A	#N/A	#N/A	#N/A	#N/A		Q2/1984	#N/A	#N/A	#N/A	#N/A
Q3/1984	1984-09-30	#N/A	#N/A	#N/A	#N/A	#N/A	#N/A	#N/A	#N/A	#N/A	#N/A	#N/A	#N/A	#N/A	#N/A	#N/A		Q3/1984	#N/A	#N/A	#N/A	#N/A
Q4/1984	1984-12-31	#N/A	#N/A	#N/A	#N/A	#N/A	#N/A	#N/A	#N/A	#N/A	#N/A	#N/A	#N/A	#N/A	#N/A	#N/A		Q4/1984	#N/A	#N/A	#N/A	#N/A
Q1/1985	1985-03-31	#N/A	#N/A	#N/A	#N/A	#N/A	#N/A	#N/A	#N/A	#N/A	#N/A	#N/A	#N/A	#N/A	#N/A	#N/A		Q1/1985	#N/A	#N/A	#N/A	#N/A
Q2/1985	1985-06-30	#N/A	#N/A	#N/A	#N/A	#N/A	#N/A	#N/A	#N/A	#N/A	#N/A	#N/A	#N/A	#N/A	#N/A	#N/A		Q2/1985	#N/A	#N/A	#N/A	#N/A
Q3/1985	1985-09-30	#N/A	#N/A	#N/A	#N/A	#N/A	#N/A	#N/A	#N/A	#N/A	#N/A	#N/A	#N/A	#N/A	#N/A	#N/A		Q3/1985	#N/A	#N/A	#N/A	#N/A
Q4/1985	1985-12-31	#N/A	#N/A	#N/A	#N/A	#N/A	#N/A	#N/A	#N/A	#N/A	#N/A	#N/A	#N/A	#N/A	#N/A	#N/A		Q4/1985	#N/A	#N/A	#N/A	#N/A
Q1/1986	1986-03-31	#N/A	#N/A	#N/A	#N/A	#N/A	#N/A	#N/A	#N/A	#N/A	#N/A	#N/A	#N/A	#N/A	#N/A	#N/A		Q1/1986	#N/A	#N/A	#N/A	#N/A
Q2/1986	1986-06-30	#N/A	#N/A	#N/A	#N/A	#N/A	#N/A	#N/A	#N/A	#N/A	#N/A	#N/A	#N/A	#N/A	#N/A	#N/A		Q2/1986	#N/A	#N/A	#N/A	#N/A
Q3/1986	1986-09-30	#N/A	#N/A	#N/A	#N/A	#N/A	#N/A	#N/A	#N/A	#N/A	#N/A	#N/A	#N/A	#N/A	#N/A	#N/A		Q3/1986	#N/A	#N/A	#N/A	#N/A
Q4/1986	1986-12-31	#N/A	#N/A	#N/A	#N/A	#N/A	#N/A	#N/A	#N/A	#N/A	#N/A	#N/A	#N/A	#N/A	#N/A	#N/A		Q4/1986	#N/A	#N/A	#N/A	#N/A
Q1/1987	1987-03-31	#N/A	#N/A	#N/A	#N/A	#N/A	#N/A	#N/A	#N/A	#N/A	#N/A	#N/A	#N/A	#N/A	#N/A	#N/A		Q1/1987	#N/A	#N/A	#N/A	#N/A
Q2/1987	1987-06-30	#N/A	#N/A	#N/A	#N/A	#N/A	#N/A	#N/A	#N/A	#N/A	#N/A	#N/A	#N/A	#N/A	#N/A	#N/A		Q2/1987	#N/A	#N/A	#N/A	#N/A
Q3/1987	1987-09-30	#N/A	#N/A	#N/A	#N/A	#N/A	#N/A	#N/A	#N/A	#N/A	#N/A	#N/A	#N/A	#N/A	#N/A	#N/A		Q3/1987	#N/A	#N/A	#N/A	#N/A
Q4/1987	1987-12-31	#N/A	#N/A	#N/A	#N/A	#N/A	#N/A	#N/A	#N/A	#N/A	#N/A	#N/A	#N/A	#N/A	#N/A	#N/A		Q4/1987	#N/A	#N/A	#N/A	#N/A
Q1/1988	1988-03-31	#N/A	#N/A	#N/A	#N/A	#N/A	#N/A	#N/A	#N/A	#N/A	#N/A	#N/A	#N/A	#N/A	#N/A	#N/A		Q1/1988	#N/A	#N/A	#N/A	#N/A
Q2/1988	1988-06-30	#N/A	#N/A	#N/A	#N/A	#N/A	#N/A	#N/A	#N/A	#N/A	#N/A	#N/A	#N/A	#N/A	#N/A	#N/A		Q2/1988	#N/A	#N/A	#N/A	#N/A
Q3/1988	1988-09-30	#N/A	#N/A	#N/A	#N/A	#N/A	#N/A	#N/A	#N/A	#N/A	#N/A	#N/A	#N/A	#N/A	#N/A	#N/A		Q3/1988	#N/A	#N/A	#N/A	#N/A
Q4/1988	1988-12-31	#N/A	#N/A	#N/A	#N/A	#N/A	#N/A	#N/A	#N/A	#N/A	#N/A	#N/A	#N/A	#N/A	#N/A	#N/A		Q4/1988	#N/A	#N/A	#N/A	#N/A
Q1/1989	1989-03-31	#N/A	#N/A	#N/A	#N/A	#N/A	#N/A	#N/A	#N/A	#N/A	#N/A	#N/A	#N/A	#N/A	#N/A	#N/A		Q1/1989	#N/A	#N/A	#N/A	#N/A
Q2/1989	1989-06-30	#N/A	#N/A	#N/A	#N/A	#N/A	#N/A	#N/A	#N/A	#N/A	#N/A	#N/A	#N/A	#N/A	#N/A	#N/A		Q2/1989	#N/A	#N/A	#N/A	#N/A
Q3/1989	1989-09-30	#N/A	#N/A	#N/A	#N/A	#N/A	#N/A	#N/A	#N/A	#N/A	#N/A	#N/A	#N/A	#N/A	#N/A	#N/A		Q3/1989	#N/A	#N/A	#N/A	#N/A
Q4/1989	1989-12-31	#N/A	#N/A	#N/A	#N/A	#N/A	#N/A	#N/A	#N/A	#N/A	#N/A	#N/A	#N/A	#N/A	#N/A	#N/A		Q4/1989	#N/A	#N/A	#N/A	#N/A
Q1/1990	1990-03-31	#N/A	#N/A	#N/A	#N/A	#N/A	#N/A	#N/A	#N/A	#N/A	#N/A	#N/A	#N/A	#N/A	#N/A	#N/A		Q1/1990	#N/A	#N/A	#N/A	#N/A
Q2/1990	1990-06-30	#N/A	#N/A	#N/A	#N/A	#N/A	#N/A	#N/A	#N/A	#N/A	#N/A	#N/A	#N/A	#N/A	#N/A	#N/A		Q2/1990	#N/A	#N/A	#N/A	#N/A
Q3/1990	1990-09-30	#N/A	#N/A	#N/A	#N/A	#N/A	#N/A	#N/A	#N/A	#N/A	#N/A	#N/A	#N/A	#N/A	#N/A	#N/A		Q3/1990	#N/A	#N/A	#N/A	#N/A
Q4/1990	1990-12-31	#N/A	#N/A	#N/A	#N/A	#N/A	#N/A	#N/A	#N/A	#N/A	#N/A	#N/A	#N/A	#N/A	#N/A	#N/A		Q4/1990	#N/A	#N/A	#N/A	#N/A
Q1/1991	1991-03-31	#N/A	#N/A	#N/A	#N/A	#N/A	#N/A	#N/A	#N/A	#N/A	#N/A	#N/A	#N/A	#N/A	#N/A	#N/A		Q1/1991	#N/A	#N/A	#N/A	#N/A
Q2/1991	1991-06-30	#N/A	#N/A	#N/A	#N/A	#N/A	#N/A	#N/A	#N/A	#N/A	#N/A	#N/A	#N/A	#N/A	#N/A	#N/A		Q2/1991	#N/A	#N/A	#N/A	#N/A
Q3/1991	1991-09-30	#N/A	#N/A	#N/A	#N/A	#N/A	#N/A	#N/A	#N/A	#N/A	#N/A	#N/A	#N/A	#N/A	#N/A	#N/A		Q3/1991	#N/A	#N/A	#N/A	#N/A
Q4/1991	1991-12-31	#N/A	#N/A	#N/A	#N/A	#N/A	#N/A	#N/A	#N/A	#N/A	#N/A	#N/A	#N/A	#N/A	#N/A	#N/A		Q4/1991	#N/A	#N/A	#N/A	#N/A
Q1/1992	1992-03-31	#N/A	#N/A	#N/A	#N/A	#N/A	#N/A	#N/A	#N/A	#N/A	#N/A	#N/A	#N/A	#N/A	#N/A	#N/A		Q1/1992	#N/A	#N/A	#N/A	#N/A
Q2/1992	1992-06-30	#N/A	#N/A	#N/A	#N/A	#N/A	#N/A	#N/A	#N/A	#N/A	#N/A	#N/A	#N/A	#N/A	#N/A	#N/A		Q2/1992	#N/A	#N/A	#N/A	#N/A
Q3/1992	1992-09-30	#N/A	#N/A	#N/A	#N/A	#N/A	#N/A	#N/A	#N/A	#N/A	#N/A	#N/A	#N/A	#N/A	#N/A	#N/A		Q3/1992	#N/A	#N/A	#N/A	#N/A
Q4/1992	1992-12-31	#N/A	#N/A	#N/A	#N/A	#N/A	#N/A	#N/A	#N/A	#N/A	#N/A	#N/A	#N/A	#N/A	#N/A	#N/A		Q4/1992	#N/A	#N/A	#N/A	#N/A
Q1/1993	1993-03-31	#N/A	#N/A	#N/A	#N/A	#N/A	#N/A	#N/A	#N/A	#N/A	#N/A	#N/A	#N/A	#N/A	#N/A	#N/A		Q1/1993	#N/A	#N/A	#N/A	#N/A
Q2/1993	1993-06-30	#N/A	#N/A	#N/A	#N/A	#N/A	#N/A	#N/A	#N/A	#N/A	#N/A	#N/A	#N/A	#N/A	#N/A	#N/A		Q2/1993	#N/A	#N/A	#N/A	#N/A
Q3/1993	1993-09-30	#N/A	#N/A	#N/A	#N/A	#N/A	#N/A	#N/A	#N/A	#N/A	#N/A	#N/A	#N/A	#N/A	#N/A	#N/A		Q3/1993	#N/A	#N/A	#N/A	#N/A
Q4/1993	1993-12-31	#N/A	#N/A	#N/A	#N/A	#N/A	#N/A	#N/A	#N/A	#N/A	#N/A	#N/A	#N/A	#N/A	#N/A	#N/A		Q4/1993	#N/A	#N/A	#N/A	#N/A
Q1/1994	1994-03-31	#N/A	#N/A	#N/A	#N/A	#N/A	#N/A	#N/A	#N/A	#N/A	#N/A	#N/A	#N/A	#N/A	#N/A	#N/A		Q1/1994	#N/A	#N/A	#N/A	#N/A
Q2/1994	1994-06-30	#N/A	#N/A	#N/A	#N/A	#N/A	#N/A	#N/A	#N/A	#N/A	#N/A	#N/A	#N/A	#N/A	#N/A	#N/A		Q2/1994	#N/A	#N/A	#N/A	#N/A
Q3/1994	1994-09-30	#N/A	#N/A	#N/A	#N/A	#N/A	#N/A	#N/A	#N/A	#N/A	#N/A	#N/A	#N/A	#N/A	#N/A	#N/A		Q3/1994	#N/A	#N/A	#N/A	#N/A
Q4/1994	1994-12-31	#N/A	#N/A	#N/A	#N/A	#N/A	#N/A	#N/A	#N/A	#N/A	#N/A	#N/A	#N/A	#N/A	#N/A	#N/A		Q4/1994	#N/A	#N/A	#N/A	#N/A
Q1/1995	1995-03-31	#N/A	#N/A	#N/A	#N/A	#N/A	#N/A	#N/A	#N/A	#N/A	#N/A	#N/A	#N/A	#N/A	#N/A	#N/A		Q1/1995	#N/A	#N/A	#N/A	#N/A
Q2/1995	1995-06-30	#N/A	#N/A	#N/A	#N/A	#N/A	#N/A	#N/A	#N/A	#N/A	#N/A	#N/A	#N/A	#N/A	#N/A	#N/A		Q2/1995	#N/A	#N/A	#N/A	#N/A
Q3/1995	1995-09-30	#N/A	#N/A	#N/A	#N/A	#N/A	#N/A	#N/A	#N/A	#N/A	#N/A	#N/A	#N/A	#N/A	#N/A	#N/A		Q3/1995	#N/A	#N/A	#N/A	#N/A
Q4/1995	1995-12-31	#N/A	#N/A	#N/A	#N/A	#N/A	#N/A	#N/A	#N/A	#N/A	#N/A	#N/A	#N/A	#N/A	#N/A	#N/A		Q4/1995	#N/A	#N/A	#N/A	#N/A
Q1/1996	1996-03-31	#N/A	#N/A	#N/A	#N/A	#N/A	#N/A	#N/A	#N/A	#N/A	#N/A	#N/A	#N/A	#N/A	#N/A	#N/A		Q1/1996	#N/A	#N/A	#N/A	#N/A
Q2/1996	1996-06-30	#N/A	#N/A	#N/A	#N/A	#N/A	#N/A	#N/A	#N/A	#N/A	#N/A	#N/A	#N/A	#N/A	#N/A	#N/A		Q2/1996	#N/A	#N/A	#N/A	#N/A
Q3/1996	1996-09-30	#N/A	#N/A	#N/A	#N/A	#N/A	#N/A	#N/A	#N/A	#N/A	#N/A	#N/A	#N/A	#N/A	#N/A	#N/A		Q3/1996	#N/A	#N/A	#N/A	#N/A
Q4/1996	1996-12-31	#N/A	#N/A	#N/A	#N/A	#N/A	#N/A	#N/A	#N/A	#N/A	#N/A	#N/A	#N/A	#N/A	#N/A	#N/A		Q4/1996	#N/A	#N/A	#N/A	#N/A
Q1/1997	1997-03-31	#N/A	#N/A	#N/A	#N/A	#N/A	#N/A	#N/A	#N/A	#N/A	#N/A	#N/A	#N/A	#N/A	#N/A	#N/A		Q1/1997	#N/A	#N/A	#N/A	#N/A
Q2/1997	1997-06-30	#N/A	#N/A	#N/A	#N/A	#N/A	#N/A	#N/A	#N/A	#N/A	#N/A	#N/A	#N/A	#N/A	#N/A	#N/A		Q2/1997	#N/A	#N/A	#N/A	#N/A
Q3/1997	1997-09-30	#N/A	#N/A	#N/A	#N/A	#N/A	#N/A	#N/A	#N/A	#N/A	#N/A	#N/A	#N/A	#N/A	#N/A	#N/A		Q3/1997	#N/A	#N/A	#N/A	#N/A
Q4/1997	1997-12-31	#N/A	#N/A	#N/A	#N/A	#N/A	#N/A	#N/A	#N/A	#N/A	#N/A	#N/A	#N/A	#N/A	#N/A	#N/A		Q4/1997	#N/A	#N/A	#N/A	#N/A
Q1/1998	1998-03-31	#N/A	#N/A	#N/A	#N/A	#N/A	#N/A	#N/A	#N/A	#N/A	#N/A	#N/A	#N/A	#N/A	#N/A	#N/A		Q1/1998	#N/A	#N/A	#N/A	#N/A
Q2/1998	1998-06-30	#N/A	#N/A	#N/A	#N/A	#N/A	#N/A	#N/A	#N/A	#N/A	#N/A	#N/A	#N/A	#N/A	#N/A	#N/A		Q2/1998	#N/A	#N/A	#N/A	#N/A
Q3/1998	1998-09-30	#N/A	#N/A	#N/A	#N/A	#N/A	#N/A	#N/A	#N/A	#N/A	#N/A	#N/A	#N/A	#N/A	#N/A	#N/A		Q3/1998	#N/A	#N/A	#N/A	#N/A
Q4/1998	1998-12-31	#N/A	#N/A	#N/A	#N/A	#N/A	#N/A	#N/A	#N/A	#N/A	#N/A	#N/A	#N/A	#N/A	#N/A	#N/A		Q4/1998	#N/A	#N/A	#N/A	#N/A
Q1/1999	1999-03-31	#N/A	#N/A	#N/A	#N/A	#N/A	#N/A	#N/A	#N/A	#N/A	#N/A	#N/A	#N/A	#N/A	#N/A	#N/A		Q1/1999	#N/A	#N/A	#N/A	#N/A
Q2/1999	1999-06-30	#N/A	#N/A	#N/A	#N/A	#N/A	#N/A	#N/A	#N/A	#N/A	#N/A	#N/A	#N/A	#N/A	#N/A	#N/A		Q2/1999	#N/A	#N/A	#N/A	#N/A
Q3/1999	1999-09-30	#N/A	#N/A	#N/A	#N/A	#N/A	#N/A	#N/A	#N/A	#N/A	#N/A	#N/A	#N/A	#N/A	#N/A	#N/A		Q3/1999	#N/A	#N/A	#N/A	#N/A
Q4/1999	1999-12-31	#N/A	#N/A	#N/A	#N/A	#N/A	#N/A	#N/A	#N/A	#N/A	#N/A	#N/A	#N/A	#N/A	#N/A	#N/A		Q4/1999	#N/A	#N/A	#N/A	#N/A
Q1/2000	2000-03-31	#N/A	#N/A	#N/A	#N/A	#N/A	#N/A	#N/A	#N/A	#N/A	#N/A	#N/A	#N/A	#N/A	#N/A	#N/A		Q1/2000	#N/A	#N/A	#N/A	#N/A
Q2/2000	2000-06-30	#N/A	#N/A	#N/A	#N/A	#N/A	#N/A	#N/A	#N/A	#N/A	#N/A	#N/A	#N/A	#N/A	#N/A	#N/A		Q2/2000	#N/A	#N/A	#N/A	#N/A
Q3/2000	2000-09-30	#N/A	#N/A	#N/A	#N/A	#N/A	#N/A	#N/A	#N/A	#N/A	#N/A	#N/A	#N/A	#N/A	#N/A	#N/A		Q3/2000	#N/A	#N/A	#N/A	#N/A
Q4/2000	2000-12-31	#N/A	#N/A	#N/A	#N/A	#N/A	#N/A	#N/A	#N/A	#N/A	#N/A	#N/A	#N/A	#N/A	#N/A	#N/A		Q4/2000	#N/A	#N/A	#N/A	#N/A
Q1/2001	2001-03-31	#N/A	#N/A	#N/A	#N/A	#N/A	#N/A	#N/A	#N/A	#N/A	#N/A	#N/A	#N/A	#N/A	#N/A	#N/A		Q1/2001	#N/A	#N/A	#N/A	#N/A
Q2/2001	2001-06-30	#N/A	#N/A	#N/A	#N/A	#N/A	#N/A	#N/A	#N/A	#N/A	#N/A	#N/A	#N/A	#N/A	#N/A	#N/A		Q2/2001	#N/A	#N/A	#N/A	#N/A
Q3/2001	2001-09-30	#N/A	#N/A	#N/A	#N/A	#N/A	#N/A	#N/A	#N/A	#N/A	#N/A	#N/A	#N/A	#N/A	#N/A	#N/A		Q3/2001	#N/A	#N/A	#N/A	#N/A
Q4/2001	2001-12-31	#N/A	#N/A	#N/A	#N/A	#N/A	#N/A	#N/A	#N/A	#N/A	#N/A	#N/A	#N/A	#N/A	#N/A	#N/A		Q4/2001	#N/A	#N/A	#N/A	#N/A
Q1/2002	2002-03-31	#N/A	#N/A	#N/A	#N/A	#N/A	#N/A	#N/A	#N/A	#N/A	#N/A	#N/A	#N/A	#N/A	#N/A	#N/A		Q1/2002	#N/A	#N/A	#N/A	#N/A
Q2/2002	2002-06-30	#N/A	#N/A	#N/A	#N/A	#N/A	#N/A	#N/A	#N/A	#N/A	#N/A	#N/A	#N/A	#N/A	#N/A	#N/A		Q2/2002	#N/A	#N/A	#N/A	#N/A
Q3/2002	2002-09-30	#N/A	#N/A	#N/A	#N/A	#N/A	#N/A	#N/A	#N/A	#N/A	#N/A	#N/A	#N/A	#N/A	#N/A	#N/A		Q3/2002	#N/A	#N/A	#N/A	#N/A
Q4/2002	2002-12-31	#N/A	#N/A	#N/A	#N/A	#N/A	#N/A	#N/A	#N/A	#N/A	#N/A	#N/A	#N/A	#N/A	#N/A	#N/A		Q4/2002	#N/A	#N/A	#N/A	#N/A
Q1/2003	2003-03-31	#N/A	#N/A	#N/A	#N/A	#N/A	#N/A	#N/A	#N/A	#N/A	#N/A	#N/A	#N/A	#N/A	#N/A	#N/A		Q1/2003	#N/A	#N/A	#N/A	#N/A
Q2/2003	2003-06-30	#N/A	#N/A	#N/A	#N/A	#N/A	#N/A	#N/A	#N/A	#N/A	#N/A	#N/A	#N/A	#N/A	#N/A	#N/A		Q2/2003	#N/A	#N/A	#N/A	#N/A
Q3/2003	2003-09-30	#N/A	#N/A	#N/A	#N/A	#N/A	#N/A	#N/A	#N/A	#N/A	#N/A	#N/A	#N/A	#N/A	#N/A	#N/A		Q3/2003	#N/A	#N/A	#N/A	#N/A
Q4/2003	2003-12-31	#N/A	#N/A	#N/A	#N/A	#N/A	#N/A	#N/A	#N/A	#N/A	#N/A	#N/A	#N/A	#N/A	#N/A	#N/A		Q4/2003	#N/A	#N/A	#N/A	#N/A
Q1/2004	2004-03-31	#N/A	#N/A	#N/A	#N/A	#N/A	#N/A	#N/A	#N/A	#N/A	#N/A	#N/A	#N/A	#N/A	#N/A	#N/A		Q1/2004	#N/A	#N/A	#N/A	#N/A
Q2/2004	2004-06-30	#N/A	#N/A	#N/A	#N/A	#N/A	#N/A	#N/A	#N/A	#N/A	#N/A	#N/A	#N/A	#N/A	#N/A	#N/A		Q2/2004	#N/A	#N/A	#N/A	#N/A
Q3/2004	2004-09-30	#N/A	#N/A	#N/A	#N/A	#N/A	#N/A	#N/A	#N/A	#N/A	#N/A	#N/A	#N/A	#N/A	#N/A	#N/A		Q3/2004	#N/A	#N/A	#N/A	#N/A
Q4/2004	2004-12-31	#N/A	#N/A	#N/A	#N/A	#N/A	#N/A	#N/A	#N/A	#N/A	#N/A	#N/A	#N/A	#N/A	#N/A	#N/A		Q4/2004	#N/A	#N/A	#N/A	#N/A
Q1/2005	2005-03-31	31	55	62.4	195.7	437.1	218.1	226.5	99.8	153.2	673.5	404.2	266.2	138.9	91.9	495.3		Q1/2005	31	554.5	195.7	2767.6
Q2/2005	2005-06-30	32.1	55.3	60.7	193.8	444.3	220.6	231.4	100.4	156.7	683.3	400.7	267.4	139.2	92.1	495.3		Q2/2005	32.1	560.3	193.8	2787.1
Q3/2005	2005-09-30	32.3	51.6	63.2	192.3	444.6	223.3	236	106.6	155.1	692	401.6	270.4	140.1	92.6	496.5		Q3/2005	32.3	559.4	192.3	2814.2
Q4/2005	2005-12-31	32	50.9	64.3	191	450.8	227.7	231.2	107.6	155.5	694.5	406	271.8	141.1	92	498.1		Q4/2005	32	566	191	2825.5
Q1/2006	2006-03-31	31.9	58.2	63.1	194.4	461.3	230.1	234.2	109.4	153.4	699.2	414.5	277.9	143.6	93.1	497.1		Q1/2006	31.9	582.6	194.4	2852.5
Q2/2006	2006-06-30	35.9	57.1	67.4	190.9	463.7	230.3	234.7	111.6	157.3	697.6	414.8	279.7	143.1	92.9	498		Q2/2006	35.9	588.2	190.9	2860
Q3/2006	2006-09-30	33.5	58.4	68	186.8	466.6	230.8	228.7	110.2	162.8	703.3	413.9	279.2	142.1	92.3	500.1		Q3/2006	33.5	593	186.8	2863.4
Q4/2006	2006-12-31	31.2	61.9	65.8	181.4	473.3	232.3	232.2	108.8	162.2	715.6	415.1	280.5	143.3	91.9	501.5		Q4/2006	31.2	601	181.4	2883.4
Q1/2007	2007-03-31	30	62.7	65.2	181.3	470	233.1	228.7	105.8	166.2	721.6	417.6	279.2	144.1	91.2	501.9		Q1/2007	30	597.9	181.3	2889.4
Q2/2007	2007-06-30	28.8	64.8	67.7	184.2	478.2	238.8	223.9	109.6	171.2	718.8	419	280.4	143.2	90.5	503		Q2/2007	28.8	610.7	184.2	2898.4
Q3/2007	2007-09-30	27.2	62.9	66.9	182.1	488.7	239.9	225.5	106.9	177.7	718	428.4	282.6	142.3	90	504.8		Q3/2007	27.2	618.5	182.1	2916.1
Q4/2007	2007-12-31	28.3	60.9	67.7	177.6	488	242.7	226.1	112.1	182.3	708.3	436.3	285.8	143.2	89.2	508.1		Q4/2007	28.3	616.6	177.6	2934.1
Q1/2008	2008-03-31	31.1	58.5	67.2	169.8	468.9	241.5	221.1	111.3	181.8	711.7	438.2	291.2	141.3	87.9	511.2		Q1/2008	31.1	594.6	169.8	2937.2
Q2/2008	2008-06-30	29.7	57.7	71	168.1	485	240.4	218.9	109.9	186.3	699.1	445.9	295	141	87	513		Q2/2008	29.7	613.7	168.1	2936.5
Q3/2008	2008-09-30	28.8	61.7	70.7	166.7	467.5	236.2	216.4	109.9	187	686.8	450.2	299.4	139.4	86.6	516.2		Q3/2008	28.8	599.9	166.7	2928.1
Q4/2008	2008-12-31	32.5	76.4	60.7	157.6	447.8	225.4	210.1	102.9	177	665.5	443.6	302.2	136.9	86	514.2		Q4/2008	32.5	584.9	157.6	2863.8
Q1/2009	2009-03-31	32.8	79.9	59.9	146.2	423.4	210.1	209.9	96.7	174.3	707.2	421.9	303	131.9	83.8	513.7		Q1/2009	32.8	563.2	146.2	2852.5
Q2/2009	2009-06-30	33	72.3	61.3	144.2	424.9	202.6	209.4	99.5	174.5	720.4	414	303.7	130.4	82.9	516.7		Q2/2009	33	558.5	144.2	2854.1
Q3/2009	2009-09-30	36.9	70.1	63.1	146.2	431.8	201.7	209.3	100.3	175.2	724.7	412.9	302.8	129.5	81.7	517.1		Q3/2009	36.9	565	146.2	2855.2
Q4/2009	2009-12-31	35.1	68.1	66.5	140.8	446.6	208.4	213.5	102.3	181.4	721.7	412.4	304.5	130.5	81.2	518.3		Q4/2009	35.1	581.2	140.8	2874.2
Q1/2010	2010-03-31	34	67	70.1	136.4	448.9	206.2	212.7	102.4	180.4	726.4	420.7	302.7	132.6	80.2	519.8		Q1/2010	34	586	136.4	2884.1
Q2/2010	2010-06-30	36	67.9	67.6	139.2	452.9	210.4	214.3	103.1	181.6	731.5	425.9	304.7	134.7	80.7	521.3		Q2/2010	36	588.4	139.2	2908.2
Q3/2010	2010-09-30	35.9	68	68.3	138.2	456.8	216	218	106.6	187.4	727.9	432.8	306.1	135.9	81.6	519.6		Q3/2010	35.9	593.1	138.2	2931.9
Q4/2010	2010-12-31	34.5	69.8	68.5	137.9	459.6	215.7	217.2	109.2	185.7	739.7	438.7	307.1	138.2	81.5	519.1		Q4/2010	34.5	597.9	137.9	2952.1
Q1/2011	2011-03-31	34.8	68.7	65.8	134.3	453	216	217	108.6	182.5	738.5	439.8	307.9	138.9	80.6	518.8		Q1/2011	34.8	587.5	134.3	2948.6
Q2/2011	2011-06-30	32.4	70.4	69.9	137.2	454.8	214.1	216.1	109.7	183.9	742.4	446.7	310.1	140.9	80.7	518.6		Q2/2011	32.4	595.1	137.2	2963.2
Q3/2011	2011-09-30	32.6	73.4	69.4	138	454.1	213.3	216.7	108.5	185.1	748.3	447.2	310.9	142	80.7	517.1		Q3/2011	32.6	596.9	138	2969.8
Q4/2011	2011-12-31	34.3	77.6	72.8	139.1	461.5	222.7	217.8	109.7	184.7	757	449.2	310.9	140.8	80.7	517.2		Q4/2011	34.3	611.9	139.1	2990.7
Q1/2012	2012-03-31	32.4	77.2	67.1	141.7	463	219.6	221.5	110.6	184.8	761.6	459.3	315.5	143.9	81.9	517.5		Q1/2012	32.4	607.3	141.7	3016.2
Q2/2012	2012-06-30	31.9	79.9	70.4	142	460.9	223.8	216.7	110.3	189.4	767.1	462.3	314.6	143.6	82.3	516.8		Q2/2012	31.9	611.2	142	3026.9
Q3/2012	2012-09-30	29.6	80.4	70.3	141.6	454.5	224	224	109.6	186.6	773.1	462.6	315.5	143.5	82.7	516.8		Q3/2012	29.6	605.2	141.6	3038.4
Q4/2012	2012-12-31	29.2	82.8	69.1	143.9	450.5	223.7	221.4	109.2	183.8	767.6	471.9	317.8	145.4	82.7	516.2		Q4/2012	29.2	602.4	143.9	3039.7
Q1/2013	2013-03-31	33.2	83.4	71.1	145.6	465.4	225.7	227.3	111.8	195.7	753	460.5	319.7	147.7	82.1	515.5		Q1/2013	33.2	619.9	145.6	3039
Q2/2013	2013-06-30	35.7	84.8	69.7	145.3	463.6	227.1	225.3	109.9	196.6	755.4	465.9	319.4	146.7	81.5	514.3		Q2/2013	35.7	618.1	145.3	3042.1
Q3/2013	2013-09-30	37.9	85.6	67.6	147.2	466.2	231.7	227.3	110.3	197.4	763.9	474.2	320.1	147.1	81.5	511.9		Q3/2013	37.9	619.4	147.2	3065.4
Q4/2013	2013-12-31	37.1	88	66.3	146.8	469.8	235	229.6	112.8	203.3	776.4	479.1	320.2	148.7	82	508.9		Q4/2013	37.1	624.1	146.8	3096
Q1/2014	2014-03-31	35.2	85.9	66.1	147.3	467.4	231.9	229.5	111.9	196.4	773.7	480.5	321.7	150.2	82.4	511.3		Q1/2014	35.2	619.4	147.3	3089.5
Q2/2014	2014-06-30	35.5	89.2	65.5	149	473.5	237.1	234.2	112.8	197.6	782.6	486.1	323	152.2	83.6	511.9		Q2/2014	35.5	628.2	149	3121.1
Q3/2014	2014-09-30	35.4	95.1	67.3	149	477.6	245.5	235.9	114.8	199.1	789.5	498.1	327.2	154.7	85.1	512		Q3/2014	35.4	640	149	3161.9
Q4/2014	2014-12-31	36.8	102	67.1	150.4	474.9	246	233.9	114	201.7	795.7	500.8	329.1	154.9	84.9	512.1		Q4/2014	36.8	644	150.4	3173.1
Q1/2015	2015-03-31	37.1	103.6	63.1	151.7	482.1	246.2	236	112.2	211.2	808.2	503.9	331.8	154	84.5	511.3		Q1/2015	37.1	648.8	151.7	3199.3
Q2/2015	2015-06-30	37.6	99.1	66.1	156.8	476.3	247.5	241.3	113.4	216.7	814.2	503.8	333.7	155.1	84.8	512.6		Q2/2015	37.6	641.5	156.8	3223.1
Q3/2015	2015-09-30	39.5	98.4	67.4	159.3	477.3	246.7	243.3	115.1	221.6	806.4	507.3	336.3	156.1	84.7	514		Q3/2015	39.5	643.1	159.3	3231.5
Q4/2015	2015-12-31	39.4	92.6	65.9	159.7	474.8	247.8	247.3	113.9	227.3	803.1	510.5	340.4	157	84.9	514.5		Q4/2015	39.4	633.3	159.7	3246.7
Q1/2016	2016-03-31	41.5	90.8	67.1	163.4	480.2	244.9	248.9	112.4	230.4	801.9	510.4	339	156.6	85.1	515.7		Q1/2016	41.5	638.1	163.4	3245.3
Q2/2016	2016-06-30	42.8	83.7	67.6	161.3	480.2	246.5	250.9	114.2	228.7	810.6	516.3	343.3	156.8	85	517.3		Q2/2016	42.8	631.5	161.3	3269.6
Q3/2016	2016-09-30	42.9	82.6	69.9	161.8	480.5	249.4	252.7	115.3	231.7	817.1	520.5	344.3	158.3	85.7	519.9		Q3/2016	42.9	633	161.8	3294.9
Q4/2016	2016-12-31	42.5	84.3	70.1	161.7	478.6	249.3	255.8	115.9	233.9	825.6	523.2	343.7	159.9	85.7	520.2		Q4/2016	42.5	633	161.7	3313.2
Q1/2017	2017-03-31	39.4	86.8	69	163.2	483.3	251.4	255.6	117	234.8	822.5	525.7	346.6	159.7	85.7	520.7		Q1/2017	39.4	639.1	163.2	3319.7
Q2/2017	2017-06-30	38.3	92.4	70.5	162.3	487.1	253	259.1	117.7	238.8	820.5	533.3	349.9	161.7	86.6	520.9		Q2/2017	38.3	650	162.3	3341.5
Q3/2017	2017-09-30	38.1	94.6	69.4	161.8	489.6	255.3	263.1	118	244	831.2	537.6	353.9	162.4	87.3	521.6		Q3/2017	38.1	653.6	161.8	3374.4
Q4/2017	2017-12-31	37.9	96.9	70.9	165.1	495.9	258	265.4	119.6	243.9	829.4	545.1	355.8	162.6	88.4	521.7		Q4/2017	37.9	663.7	165.1	3389.9
Q1/2018	2018-03-31	37.5	98.1	69.7	166.7	500.1	258.1	267.3	121.4	248	835.4	546.4	357.8	161.5	87.4	521

## Sheet: UK (Quarterly)
Q1/1960 !Q	.excel_last	S112GAFC@G10	S112GXC@G10	S112GCOC@G10	S112GSC@G10		S112GAFC@G1008	S112GXC@G1008	S112GCOC@G1008	S112GSC@G1008
.DESC		U.K.: Gross Value Added: Agriculture, Forestry & Fishing (SA, 2016=100)	U.K.: Gross Value Added: Production (SA, 2016=100)	U.K.: Gross Value Added: Construction (SA, 2016=100)	U.K.: Gross Value Added: Total Services (SA, 2016=100)		U.K.: Gross Value Added: Agriculture, Forestry & Fishing (SA, 2003=100)	U.K.: Gross Value Added: Production (SA, 2003=100)	U.K.: Gross Value Added: Construction (SA, 2003=100)	U.K.: Gross Value Added: Total Services (SA, 2003=100)
.T1		Q1-1990	Q1-1990	Q1-1990	Q1-1990		Q1-1948	Q1-1948	Q1-1948	Q1-1948
.TN		Q1-2018	Q1-2018	Q1-2018	Q1-2018		Q4-2007	Q4-2007	Q4-2007	Q4-2007
.LSOURCE		Office for National Statistics	Office for National Statistics	Office for National Statistics	Office for National Statistics		Office for National Statistics	Office for National Statistics	Office for National Statistics	Office for National Statistics		HISTORICAL SERIES GROWTH RATE						FINAL SERIES
.DTLM		Jun-29-2018 03:56	Jun-29-2018 03:56	Jun-29-2018 03:56	Jun-29-2018 03:56		Feb-27-2008 03:45	Feb-07-2008 03:52	Feb-27-2008 03:45	Feb-27-2008 03:45		PRIMARY	SECONDARY	CONSTRUCTION	TERTIARY			PRIMARY	SECONDARY	CONSTRUCTION	TERTIARY
Q1/1960	1960-03-31	#N/A	#N/A	#N/A	#N/A		47.1	50	50.3	31.8		0.00636943	-0.002	0	0.00314465		Q1/1960	44.055	54.3359	48.5711	24.3484
Q2/1960	1960-06-30	#N/A	#N/A	#N/A	#N/A		47.4	49.9	50.3	31.9		0.0126582	0.00601202	-0.00198807	0.00940439		Q2/1960	44.3356	54.2272	48.5711	24.4249
Q3/1960	1960-09-30	#N/A	#N/A	#N/A	#N/A		48	50.2	50.2	32.2		0.0166667	0.00996016	0.0358566	-0.00310559		Q3/1960	44.8968	54.5532	48.4745	24.6546
Q4/1960	1960-12-31	#N/A	#N/A	#N/A	#N/A		48.8	50.7	52	32.1		0	-0.0138067	0.0326923	0.0249221		Q4/1960	45.645	55.0966	50.2127	24.5781
Q1/1961	1961-03-31	#N/A	#N/A	#N/A	#N/A		48.8	50	53.7	32.9		-0.00819672	0.016	0.0204842	-0.00607903		Q1/1961	45.645	54.3359	51.8542	25.1906
Q2/1961	1961-06-30	#N/A	#N/A	#N/A	#N/A		48.4	50.8	54.8	32.7		-0.0103306	-0.00393701	0.00729927	0.00611621		Q2/1961	45.2709	55.2053	52.9164	25.0375
Q3/1961	1961-09-30	#N/A	#N/A	#N/A	#N/A		47.9	50.6	55.2	32.9		-0.0104384	-0.00790514	-0.00724638	-0.00607903		Q3/1961	44.8032	54.9879	53.3027	25.1906
Q4/1961	1961-12-31	#N/A	#N/A	#N/A	#N/A		47.4	50.2	54.8	32.7		0.00421941	0	0.0109489	0.00611621		Q4/1961	44.3356	54.5532	52.9164	25.0375
Q1/1962	1962-03-31	#N/A	#N/A	#N/A	#N/A		47.6	50.2	55.4	32.9		0.0336134	0.0159363	0.00902527	0.00911854		Q1/1962	44.5226	54.5532	53.4958	25.1906
Q2/1962	1962-06-30	#N/A	#N/A	#N/A	#N/A		49.2	51	55.9	33.2		0.0264228	0.00588235	0.00178891	0.0060241		Q2/1962	46.0192	55.4226	53.9786	25.4203
Q3/1962	1962-09-30	#N/A	#N/A	#N/A	#N/A		50.5	51.3	56	33.4		0.0178218	-0.00974659	-0.0517857	0.00299401		Q3/1962	47.2351	55.7486	54.0752	25.5734
Q4/1962	1962-12-31	#N/A	#N/A	#N/A	#N/A		51.4	50.8	53.1	33.5		-0.00583658	-0.00984252	-0.109228	-0.00597015		Q4/1962	48.077	55.2053	51.2749	25.65
Q1/1963	1963-03-31	#N/A	#N/A	#N/A	#N/A		51.1	50.3	47.3	33.3		0.0136986	0.0318091	0.192389	0.033033		Q1/1963	47.7964	54.6619	45.6742	25.4969
Q2/1963	1963-06-30	#N/A	#N/A	#N/A	#N/A		51.8	51.9	56.4	34.4		-0.0019305	0.0289017	0.0124113	0.00872093		Q2/1963	48.4511	56.4007	54.4614	26.3391
Q3/1963	1963-09-30	#N/A	#N/A	#N/A	#N/A		51.7	53.4	57.1	34.7		0.00386847	0.0205993	0.0367776	0.00864553		Q3/1963	48.3576	58.0307	55.1374	26.5688
Q4/1963	1963-12-31	#N/A	#N/A	#N/A	#N/A		51.9	54.5	59.2	35		0.00963391	0.0330275	0.0118243	0.00285714		Q4/1963	48.5446	59.2261	57.1652	26.7985
Q1/1964	1964-03-31	#N/A	#N/A	#N/A	#N/A		52.4	56.3	59.9	35.1		0.019084	-0.0017762	0.0166945	0.014245		Q1/1964	49.0123	61.1822	57.8411	26.8751
Q2/1964	1964-06-30	#N/A	#N/A	#N/A	#N/A		53.4	56.2	60.9	35.6		0.0168539	0.0106762	-0.00985222	0.00561798		Q2/1964	49.9477	61.0735	58.8068	27.2579
Q3/1964	1964-09-30	#N/A	#N/A	#N/A	#N/A		54.3	56.8	60.3	35.8		0.00552486	0.0264085	0.0199005	0.0139665		Q3/1964	50.7895	61.7256	58.2274	27.411
Q4/1964	1964-12-31	#N/A	#N/A	#N/A	#N/A		54.6	58.3	61.5	36.3		0.014652	0	0.0520325	-0.00275482		Q4/1964	51.0701	63.3557	59.3861	27.7939
Q1/1965	1965-03-31	#N/A	#N/A	#N/A	#N/A		55.4	58.3	64.7	36.2		-0.00180505	0	-0.0309119	0.00552486		Q1/1965	51.8184	63.3557	62.4762	27.7173
Q2/1965	1965-06-30	#N/A	#N/A	#N/A	#N/A		55.3	58.3	62.7	36.4		-0.00904159	0	-0.0015949	0.00824176		Q2/1965	51.7248	63.3557	60.5449	27.8704
Q3/1965	1965-09-30	#N/A	#N/A	#N/A	#N/A		54.8	58.3	62.6	36.7		0.00182482	0.0137221	0.0207668	0.00817439		Q3/1965	51.2571	63.3557	60.4483	28.1001
Q4/1965	1965-12-31	#N/A	#N/A	#N/A	#N/A		54.9	59.1	63.9	37		0.0236794	0.0101523	-0.00312989	0.0027027		Q4/1965	51.3507	64.225	61.7037	28.3299
Q1/1966	1966-03-31	#N/A	#N/A	#N/A	#N/A		56.2	59.7	63.7	37.1		-0.0124555	0	0.010989	0.00808625		Q1/1966	52.5666	64.8771	61.5105	28.4064
Q2/1966	1966-06-30	#N/A	#N/A	#N/A	#N/A		55.5	59.7	64.4	37.4		-0.0162162	0.00167504	0.00931677	0		Q2/1966	51.9119	64.8771	62.1865	28.6361
Q3/1966	1966-09-30	#N/A	#N/A	#N/A	#N/A		54.6	59.8	65	37.4		0.00732601	-0.0250836	0.00615385	0.0026738		Q3/1966	51.0701	64.9857	62.7658	28.6361
Q4/1966	1966-12-31	#N/A	#N/A	#N/A	#N/A		55	58.3	65.4	37.5		0.0163636	0.0137221	0.0183486	0.00533333		Q4/1966	51.4442	63.3557	63.1521	28.7127
Q1/1967	1967-03-31	#N/A	#N/A	#N/A	#N/A		55.9	59.1	66.6	37.7		0.0178891	0.0101523	0.003003	0.00795756		Q1/1967	52.286	64.225	64.3108	28.8658
Q2/1967	1967-06-30	#N/A	#N/A	#N/A	#N/A		56.9	59.7	66.8	38		0.0158172	-0.00167504	0.011976	0.00789474		Q2/1967	53.2214	64.8771	64.504	29.0955
Q3/1967	1967-09-30	#N/A	#N/A	#N/A	#N/A		57.8	59.6	67.6	38.3		0	0.0234899	0.00295858	0.0078329		Q3/1967	54.0632	64.7684	65.2765	29.3252
Q4/1967	1967-12-31	#N/A	#N/A	#N/A	#N/A		57.8	61	67.8	38.6		0.0207612	0.0393443	0.020649	0.0207254		Q4/1967	54.0632	66.2898	65.4696	29.5549
Q1/1968	1968-03-31	#N/A	#N/A	#N/A	#N/A		59	63.4	69.2	39.4		-0.0186441	0.0141956	-0.00578035	-0.0101523		Q1/1968	55.1856	68.8979	66.8215	30.1675
Q2/1968	1968-06-30	#N/A	#N/A	#N/A	#N/A		57.9	64.3	68.8	39		-0.029361	0.00933126	0.00145349	0.00512821		Q2/1968	54.1567	69.876	66.4352	29.8612
Q3/1968	1968-09-30	#N/A	#N/A	#N/A	#N/A		56.2	64.9	68.9	39.2		-0.019573	0.00154083	0	0.00255102		Q3/1968	52.5666	70.528	66.5318	30.0143
Q4/1968	1968-12-31	#N/A	#N/A	#N/A	#N/A		55.1	65	68.9	39.3		0.00181488	0.0153846	-0.00725689	0.00763359		Q4/1968	51.5377	70.6367	66.5318	30.0909
Q1/1969	1969-03-31	#N/A	#N/A	#N/A	#N/A		55.2	66	68.4	39.6		0.0253623	0.0181818	0.00146199	0.00505051		Q1/1969	51.6313	71.7234	66.049	30.3206
Q2/1969	1969-06-30	#N/A	#N/A	#N/A	#N/A		56.6	67.2	68.5	39.8		0.0141343	-0.00744048	0.00437956	0.00251256		Q2/1969	52.9408	73.0274	66.1455	30.4737
Q3/1969	1969-09-30	#N/A	#N/A	#N/A	#N/A		57.4	66.7	68.8	39.9		0.0156794	-0.0029985	-0.0116279	0		Q3/1969	53.6891	72.4841	66.4352	30.5503
Q4/1969	1969-12-31	#N/A	#N/A	#N/A	#N/A		58.3	66.5	68	39.9		0.0120069	0.00150376	-0.0397059	0.0175439		Q4/1969	54.5309	72.2667	65.6627	30.5503
Q1/1970	1970-03-31	#N/A	#N/A	#N/A	#N/A		59	66.6	65.3	40.6		0.0169492	0.003003	0.0321593	0.00738916		Q1/1970	55.1856	72.3754	63.0555	31.0863
Q2/1970	1970-06-30	#N/A	#N/A	#N/A	#N/A		60	66.8	67.4	40.9		0.015	0.00299401	0.0163205	0.00488998		Q2/1970	56.121	72.5928	65.0834	31.316
Q3/1970	1970-09-30	#N/A	#N/A	#N/A	#N/A		60.9	67	68.5	41.1		0.0114943	0.00447761	-0.020438	0.00243309		Q3/1970	56.9628	72.8101	66.1455	31.4691
Q4/1970	1970-12-31	#N/A	#N/A	#N/A	#N/A		61.6	67.3	67.1	41.2		0.0113636	-0.0104012	-0.00149031	0		Q4/1970	57.6175	73.1361	64.7937	31.5457
Q1/1971	1971-03-31	#N/A	#N/A	#N/A	#N/A		62.3	66.6	67	41.2		0.0128411	0.003003	0.0238806	0.0169903		Q1/1971	58.2723	72.3754	64.6971	31.5457
Q2/1971	1971-06-30	#N/A	#N/A	#N/A	#N/A		63.1	66.8	68.6	41.9		0.0158479	-0.00449102	-0.0102041	0.00954654		Q2/1971	59.0205	72.5928	66.2421	32.0816
Q3/1971	1971-09-30	#N/A	#N/A	#N/A	#N/A		64.1	66.5	67.9	42.3		0.0109204	-0.00150376	0.0265096	0.00945626		Q3/1971	59.9559	72.2667	65.5662	32.3879
Q4/1971	1971-12-31	#N/A	#N/A	#N/A	#N/A		64.8	66.4	69.7	42.7		0.0138889	-0.0481928	-0.00286944	0.00702576		Q4/1971	60.6106	72.1581	67.3043	32.6942
Q1/1972	1972-03-31	#N/A	#N/A	#N/A	#N/A		65.7	63.2	69.5	43		-0.00304414	0.0759494	0.0215827	0.0139535		Q1/1972	61.4525	68.6806	67.1112	32.9239
Q2/1972	1972-06-30	#N/A	#N/A	#N/A	#N/A		65.5	68	71	43.6		0.00152672	0.0102941	-0.028169	0.00458716		Q2/1972	61.2654	73.8968	68.5596	33.3833
Q3/1972	1972-09-30	#N/A	#N/A	#N/A	#N/A		65.6	68.7	69	43.8		0.00152439	0.0349345	-0.00434783	0.0136986		Q3/1972	61.3589	74.6575	66.6284	33.5364
Q4/1972	1972-12-31	#N/A	#N/A	#N/A	#N/A		65.7	71.1	68.7	44.4		0.0304414	0.0351617	0.0669578	0.027027		Q4/1972	61.4525	77.2656	66.3387	33.9958
Q1/1973	1973-03-31	#N/A	#N/A	#N/A	#N/A		67.7	73.6	73.3	45.6		-0.00443131	0.0013587	-0.0272851	-0.00219298		Q1/1973	63.3231	79.9824	70.7806	34.9146
Q2/1973	1973-06-30	#N/A	#N/A	#N/A	#N/A		67.4	73.7	71.3	45.5		0.00296736	0.00678426	-0.00420757	0.0021978		Q2/1973	63.0425	80.0911	68.8493	34.8381
Q3/1973	1973-09-30	#N/A	#N/A	#N/A	#N/A		67.6	74.2	71	45.6		0.00739645	-0.00404313	-0.0253521	0.00219298		Q3/1973	63.2296	80.6345	68.5596	34.9146
Q4/1973	1973-12-31	#N/A	#N/A	#N/A	#N/A		68.1	73.9	69.2	45.7		0.010279	-0.0703654	-0.0433526	-0.00656455		Q4/1973	63.6973	80.3085	66.8215	34.9912
Q1/1974	1974-03-31	#N/A	#N/A	#N/A	#N/A		68.8	68.7	66.2	45.4		0.0101744	0.0858806	-0.0151057	0.00220264		Q1/1974	64.352	74.6575	63.9246	34.7615
Q2/1974	1974-06-30	#N/A	#N/A	#N/A	#N/A		69.5	74.6	65.2	45.5		-0.0100719	-0.00134048	-0.0260736	0.00879121		Q2/1974	65.0068	81.0692	62.959	34.8381
Q3/1974	1974-09-30	#N/A	#N/A	#N/A	#N/A		68.8	74.5	63.5	45.9		-0.0276163	-0.0375839	-0.0488189	0		Q3/1974	64.352	80.9605	61.3174	35.1443
Q4/1974	1974-12-31	#N/A	#N/A	#N/A	#N/A		66.9	71.7	60.4	45.9		-0.0284006	-0.013947	0.00993377	0.00217865		Q4/1974	62.5749	77.9177	58.324	35.1443
Q1/1975	1975-03-31	#N/A	#N/A	#N/A	#N/A		65	70.7	61	46		-0.0153846	-0.039604	-0.00491803	0.00434783		Q1/1975	60.7977	76.831	58.9033	35.2209
Q2/1975	1975-06-30	#N/A	#N/A	#N/A	#N/A		64	67.9	60.7	46.2		-0.0234375	-0.0147275	-0.00823723	0		Q2/1975	59.8624	73.7881	58.6136	35.374
Q3/1975	1975-09-30	#N/A	#N/A	#N/A	#N/A		62.5	66.9	60.2	46.2		-0.0192	0.019432	-0.00498339	0.0021645		Q3/1975	58.4593	72.7014	58.1308	35.374
Q4/1975	1975-12-31	#N/A	#N/A	#N/A	#N/A		61.3	68.2	59.9	46.3		-0.040783	0.0117302	0.015025	0.00863931		Q4/1975	57.3369	74.1142	57.8411	35.4506
Q1/1976	1976-03-31	#N/A	#N/A	#N/A	#N/A		58.8	69	60.8	46.7		-0.0391156	0.0188406	-0.0279605	0.00856531		Q1/1976	54.9985	74.9835	58.7102	35.7569
Q2/1976	1976-06-30	#N/A	#N/A	#N/A	#N/A		56.5	70.3	59.1	47.1		0.00884956	0	-0.0135364	0.00424628		Q2/1976	52.8472	76.3963	57.0686	36.0631
Q3/1976	1976-09-30	#N/A	#N/A	#N/A	#N/A		57	70.3	58.3	47.3		0.0526316	0.0398293	0.0325901	0.00845666		Q3/1976	53.3149	76.3963	56.2961	36.2163
Q4/1976	1976-12-31	#N/A	#N/A	#N/A	#N/A		60	73.1	60.2	47.7		0.0533333	0.0232558	-0.0265781	0		Q4/1976	56.121	79.4391	58.1308	36.5225
Q1/1977	1977-03-31	#N/A	#N/A	#N/A	#N/A		63.2	74.8	58.6	47.7		0.028481	-0.00534759	0.00341297	-0.00628931		Q1/1977	59.1141	81.2865	56.5858	36.5225
Q2/1977	1977-06-30	#N/A	#N/A	#N/A	#N/A		65	74.4	58.8	47.4		0.0261538	-0.00672043	0.0119048	0.0126582		Q2/1977	60.7977	80.8518	56.7789	36.2928
Q3/1977	1977-09-30	#N/A	#N/A	#N/A	#N/A		66.7	73.9	59.5	48		0.011994	0.00405954	0.0201681	0.00625		Q3/1977	62.3878	80.3085	57.4549	36.7522
Q4/1977	1977-12-31	#N/A	#N/A	#N/A	#N/A		67.5	74.2	60.7	48.3		0.0266667	0.00404313	0.0131796	0.00828157		Q4/1977	63.1361	80.6345	58.6136	36.9819
Q1/1978	1978-03-31	#N/A	#N/A	#N/A	#N/A		69.3	74.5	61.5	48.7		0.025974	0.0295302	0.0520325	0.00821355		Q1/1978	64.8197	80.9605	59.3861	37.2882
Q2/1978	1978-06-30	#N/A	#N/A	#N/A	#N/A		71.1	76.7	64.7	49.1		0.00421941	0.00912647	-0.00772798	0.0101833		Q2/1978	66.5033	83.3513	62.4762	37.5945
Q3/1978	1978-09-30	#N/A	#N/A	#N/A	#N/A		71.4	77.4	64.2	49.6		-0.0112045	-0.00258398	-0.0140187	0.00806452		Q3/1978	66.7839	84.112	61.9933	37.9773
Q4/1978	1978-12-31	#N/A	#N/A	#N/A	#N/A		70.6	77.2	63.3	50		-0.0226629	0.00388601	-0.0363349	-0.006		Q4/1978	66.0357	83.8946	61.1243	38.2836
Q1/1979	1979-03-31	#N/A	#N/A	#N/A	#N/A		69	77.5	61	49.7		-0.0130435	0.0477419	0.0606557	0.0342052		Q1/1979	64.5391	84.2206	58.9033	38.0539
Q2/1979	1979-06-30	#N/A	#N/A	#N/A	#N/A		68.1	81.2	64.7	51.4		0.0132159	-0.020936	0.00463679	-0.0116732		Q2/1979	63.6973	88.2415	62.4762	39.3555
Q3/1979	1979-09-30	#N/A	#N/A	#N/A	#N/A		69	79.5	65	50.8		0.0405797	0	-0.00461538	0.00787402		Q3/1979	64.5391	86.3941	62.7658	38.8961
Q4/1979	1979-12-31	#N/A	#N/A	#N/A	#N/A		71.8	79.5	64.7	51.2		0.0445682	-0.0163522	-0.0200927	-0.00390625		Q4/1979	67.1581	86.3941	62.4762	39.2024
Q1/1980	1980-03-31	#N/A	#N/A	#N/A	#N/A		75	78.2	63.4	51		0.0306667	-0.0383632	-0.033123	-0.00784314		Q1/1980	70.1512	84.9813	61.2208	39.0493
Q2/1980	1980-06-30	#N/A	#N/A	#N/A	#N/A		77.3	75.2	61.3	50.6		0.0116429	-0.0359043	-0.00978793	-0.00592885		Q2/1980	72.3025	81.7212	59.193	38.743
Q3/1980	1980-09-30	#N/A	#N/A	#N/A	#N/A		78.2	72.5	60.7	50.3		-0.00255754	-0.022069	-0.0741351	-0.00397614		Q3/1980	73.1443	78.787	58.6136	38.5133
Q4/1980	1980-12-31	#N/A	#N/A	#N/A	#N/A		78	70.9	56.2	50.1		-0.00384615	-0.00141044	0.0177936	0.00798403		Q4/1980	72.9572	77.0483	54.2683	38.3601
Q1/1981	1981-03-31	#N/A	#N/A	#N/A	#N/A		77.7	70.8	57.2	50.5		0.00643501	0.00564972	-0.0314685	0.0019802		Q1/1981	72.6766	76.9396	55.2339	38.6664
Q2/1981	1981-06-30	#N/A	#N/A	#N/A	#N/A		78.2	71.2	55.4	50.6		0.0140665	0.0154494	0.0162455	0.00592885		Q2/1981	73.1443	77.3743	53.4958	38.743
Q3/1981	1981-09-30	#N/A	#N/A	#N/A	#N/A		79.3	72.3	56.3	50.9		0.0252207	0.011065	-0.044405	-0.00196464		Q3/1981	74.1732	78.5697	54.3649	38.9727
Q4/1981	1981-12-31	#N/A	#N/A	#N/A	#N/A		81.3	73.1	53.8	50.8		0.0332103	-0.00820793	0.0855019	0.00590551		Q4/1981	76.0439	79.4391	51.9508	38.8961
Q1/1982	1982-03-31	#N/A	#N/A	#N/A	#N/A		84	72.5	58.4	51.1		0.0321429	0.0165517	0.0171233	0.00195695		Q1/1982	78.5693	78.787	56.3927	39.1258
Q2/1982	1982-06-30	#N/A	#N/A	#N/A	#N/A		86.7	73.7	59.4	51.2		0.00230681	0	0.0218855	0.00585938		Q2/1982	81.0948	80.0911	57.3583	39.2024
Q3/1982	1982-09-30	#N/A	#N/A	#N/A	#N/A		86.9	73.7	60.7	51.5		-0.0172612	-0.00949796	0.0181219	0.00776699		Q3/1982	81.2819	80.0911	58.6136	39.4321
Q4/1982	1982-12-31	#N/A	#N/A	#N/A	#N/A		85.4	73	61.8	51.9		-0.0515222	0.0219178	0.0210356	0.0134875		Q4/1982	79.8788	79.3304	59.6758	39.7384
Q1/1983	1983-03-31	#N/A	#N/A	#N/A	#N/A		81	74.6	63.1	52.6		-0.0308642	0.0107239	-0.0126783	0.00380228		Q1/1983	75.7633	81.0692	60.9311	40.2743
Q2/1983	1983-06-30	#N/A	#N/A	#N/A	#N/A		78.5	75.4	62.3	52.8		0.0165605	0.0119363	0.0385233	0.0094697		Q2/1983	73.4249	81.9385	60.1586	40.4275
Q3/1983	1983-09-30	#N/A	#N/A	#N/A	#N/A		79.8	76.3	64.7	53.3		0.066416	0.0144168	0.0108192	0.00938086		Q3/1983	74.6409	82.9166	62.4762	40.8103
Q4/1983	1983-12-31	#N/A	#N/A	#N/A	#N/A		85.1	77.4	65.4	53.8		0.101058	0.00645995	0.0122324	0.0148699		Q4/1983	79.5982	84.112	63.1521	41.1931
Q1/1984	1984-03-31	#N/A	#N/A	#N/A	#N/A		93.7	77.9	66.2	54.6		0.0640342	-0.0320924	0.0135952	0.0018315		Q1/1984	87.6422	84.6553	63.9246	41.8057
Q2/1984	1984-06-30	#N/A	#N/A	#N/A	#N/A		99.7	75.4	67.1	54.7		0.0100301	-0.00928382	0.00894188	0.00914077		Q2/1984	93.2543	81.9385	64.7937	41.8822
Q3/1984	1984-09-30	#N/A	#N/A	#N/A	#N/A		100.7	74.7	67.7	55.2		-0.0297915	0.0133869	-0.0132939	0.0126812		Q3/1984	94.1897	81.1778	65.373	42.2651
Q4/1984	1984-12-31	#N/A	#N/A	#N/A	#N/A		97.7	75.7	66.8	55.9		-0.0296827	0.0356671	0.0134731	0.00715564		Q4/1984	91.3836	82.2645	64.504	42.801
Q1/1985	1985-03-31	#N/A	#N/A	#N/A	#N/A		94.8	78.4	67.7	56.3		-0.00105485	0.0395408	-0.00738552	0.0053286		Q1/1985	88.6711	85.1987	65.373	43.1073
Q2/1985	1985-06-30	#N/A	#N/A	#N/A	#N/A		94.7	81.5	67.2	56.6		-0.0654699	-0.0110429	-0.016369	0.00530035		Q2/1985	88.5776	88.5675	64.8902	43.337
Q3/1985	1985-09-30	#N/A	#N/A	#N/A	#N/A		88.5	80.6	66.1	56.9		0.0564972	-0.00620347	0.0242057	0.0105448		Q3/1985	82.7784	87.5895	63.828	43.5667
Q4/1985	1985-12-31	#N/A	#N/A	#N/A	#N/A		93.5	80.1	67.7	57.5		-0.0139037	0.0062422	-0.0443131	0.013913		Q4/1985	87.4552	87.0461	65.373	44.0261
Q1/1986	1986-03-31	#N/A	#N/A	#N/A	#N/A		92.2	80.6	64.7	58.3		0.0032538	0.0148883	0.0788253	0.0102916		Q1/1986	86.2392	87.5895	62.4762	44.6387
Q2/1986	1986-06-30	#N/A	#N/A	#N/A	#N/A		92.5	81.8	69.8	58.9		0.0151351	0.00366748	0.0286533	0.00848896		Q2/1986	86.5198	88.8935	67.4009	45.0981
Q3/1986	1986-09-30	#N/A	#N/A	#N/A	#N/A		93.9	82.1	71.8	59.4		-0.00532481	0.0182704	0.0236769	0.0117845		Q3/1986	87.8293	89.2195	69.3321	45.4809
Q4/1986	1986-12-31	#N/A	#N/A	#N/A	#N/A		93.4	83.6	73.5	60.1		-0.0224839	0.00239234	0.0217687	0.00332779		Q4/1986	87.3616	90.8496	70.9737	46.0169
Q1/1987	1987-03-31	#N/A	#N/A	#N/A	#N/A		91.3	83.8	75.1	60.3		-0.00328587	0.0107399	0.011984	0.0165837		Q1/1987	85.3974	91.067	72.5187	46.17
Q2/1987	1987-06-30	#N/A	#N/A	#N/A	#N/A		91	84.7	76	61.3		-0.00549451	0.0165289	0.0460526	0.0163132		Q2/1987	85.1168	92.045	73.3878	46.9357
Q3/1987	1987-09-30	#N/A	#N/A	#N/A	#N/A		90.5	86.1	79.5	62.3		-0.00220994	0.00929152	0.0301887	0.00642055		Q3/1987	84.6491	93.5664	76.7675	47.7013
Q4/1987	1987-12-31	#N/A	#N/A	#N/A	#N/A		90.3	86.9	81.9	62.7		0.00442968	0.0126582	0.021978	0.0175439		Q4/1987	84.462	94.4358	79.085	48.0076
Q1/1988	1988-03-31	#N/A	#N/A	#N/A	#N/A		90.7	88	83.7	63.8		0.00110254	0.00681818	0.00716846	0.0031348		Q1/1988	84.8362	95.6312	80.8231	48.8499
Q2/1988	1988-06-30	#N/A	#N/A	#N/A	#N/A		90.8	88.6	84.3	64		0.00440529	0.0225734	0.00711744	0.0125		Q2/1988	84.9297	96.2832	81.4025	49.003
Q3/1988	1988-09-30	#N/A	#N/A	#N/A	#N/A		91.2	90.6	84.9	64.8		0.0164474	0.00331126	0.0212014	0.00925926		Q3/1988	85.3039	98.4566	81.9818	49.6155
Q4/1988	1988-12-31	#N/A	#N/A	#N/A	#N/A		92.7	90.9	86.7	65.4		0.030205	0.00110011	0.0184544	0		Q4/1988	86.7069	98.7827	83.72	50.0749
Q1/1989	1989-03-31	#N/A	#N/A	#N/A	#N/A		95.5	91	88.3	65.4		0.00732984	0	0.015855	0.00611621		Q1/1989	89.3259	98.8913	85.265	50.0749
Q2/1989	1989-06-30	#N/A	#N/A	#N/A	#N/A		96.2	91	89.7	65.8		0.004158	0.00659341	-0.00334448	0		Q2/1989	89.9806	98.8913	86.6169	50.3812
Q3/1989	1989-09-30	#N/A	#N/A	#N/A	#N/A		96.6	91.6	89.4	65.8		0.00517598	0.00218341	0.0100671	0.00455927		Q3/1989	90.3547	99.5434	86.3272	50.3812
Q4/1989	1989-12-31	#N/A	#N/A	#N/A	#N/A		97.1	91.8	90.3	66.1		-0.0123584	-0.00762527	0.0310078	0.0136157		Q4/1989	90.8224	99.7607	87.1962	50.6109
Q1/1990	1990-03-31	89.7	99	89.9	51.3		95.9	91.1	93.1	67		0.0145985	0.01427	0.00214823	-0.00149254		Q1/1990	89.7	99	89.9	51.3
Q2/1990	1990-06-30	90.6	100.4	88.8	51.3		97.3	92.4	93.3	66.9		0.0143885	-0.0162338	-0.0203644	-0.00597907		Q2/1990	90.6	100.4	88.8	51.3
Q3/1990	1990-09-30	91.6	98.7	87.1	51.1		98.7	90.9	91.4	66.5		0.00506586	-0.00990099	-0.0131291	-0.00150376		Q3/1990	91.6	98.7	87.1	51.1
Q4/1990	1990-12-31	92	97.8	86.4	51.2		99.2	90	90.2	66.4		0.03125	-0.0111111	-0.0388027	-0.00150602		Q4/1990	92	97.8	86.4	51.2
Q1/1991	1991-03-31	95.1	96.7	82.7	51.3		102.3	89	86.7	66.3		0.0107527	-0.0123596	-0.0207612	0.00301659		Q1/1991	95.1	96.7	82.7	51.3
Q2/1991	1991-06-30	96.2	95.6	82.6	51.4		103.4	87.9	84.9	66.5		-0.00870406	-0.00796359	-0.0106007	0.00451128		Q2/1991	96.2	95.6	82.6	51.4
Q3/1991	1991-09-30	95.5	94.7	81.9	51.7		102.5	87.2	84	66.8		-0.00097561	0.0103211	-0.0130952	-0.00149701		Q3/1991	95.5	94.7	81.9	51.7
Q4/1991	1991-12-31	95.4	95.7	80.8	51.6		102.4	88.1	82.9	66.7		0.0546875	0	-0.00723764	-0.0029985		Q4/1991	95.4	95.7	80.8	51.6
Q1/1992	1992-03-31	99.5	95.7	78.9	51.6		108	88.1	82.3	66.5		-0.0037037	-0.0045403	-0.0133657	0.00300752		Q1/1992	99.5	95.7	78.9	51.6
Q2/1992	1992-06-30	98.5	95.3	78.5	51.8		107.6	87.7	81.2	66.7		-0.0027881	0.0102623	-0.00123153	0.0029985		Q2/1992	98.5	95.3	78.5	51.8
Q3/1992	1992-09-30	98.1	96.3	78	52.1		107.3	88.6	81.1	66.9		-0.0223672	0.00451467	-0.00863132	0.00747384		Q3/1992	98.1	96.3	78	52.1
Q4/1992	1992-12-31	95.5	96.7	76.7	52.6		104.9	89	80.4	67.4		-0.0438513	0.00337079	-0.00621891	0.00890208		Q4/1992	95.5	96.7	76.7	52.6
Q1/1993	1993-03-31	91.2	97	76.9	53.1		100.3	89.3	79.9	68		-0.0299103	0.00335946	-0.00125156	0.00882353		Q1/1993	91.2	97	76.9	53.1
Q2/1993	1993-06-30	88.2	97.3	75.7	53.6		97.3	89.6	79.8	68.6		0.00822199	0.0100446	0.00250627	0.0102041		Q2/1993	88.2	97.3	75.7	53.6
Q3/1993	1993-09-30	88.6	98.4	75.5	54		98.1	90.5	80	69.3		-0.00713558	0.0132597	0.0175	0.00577201		Q3/1993	88.6	98.4	75.5	54
Q4/1993	1993-12-31	87.8	99.6	75.2	54.3		97.4	91.7	81.4	69.7		-0.0225873	0.0141767	0.014742	0.0143472		Q4/1993	87.8	99.6	75.2	54.3
Q1/1994	1994-03-31	85.5	101	74.6	55.1		95.2	93	82.6	70.7		0.00420168	0.0215054	0.0108959	0.0127298		Q1/1994	85.5	101	74.6	55.1
Q2/1994	1994-06-30	85.7	103.2	74.8	55.5		95.6	95	83.5	71.6		0.0251046	0.00736842	0	0.0139665		Q2/1994	85.7	103.2	74.8	55.5
Q3/1994	1994-09-30	87.5	104	74.6	56.1		98	95.7	83.5	72.6		0.0153061	0.0125392	0.00479042	0.00826446		Q3/1994	87.5	104	74.6	56.1
Q4/1994	1994-12-31	88.9	105.3	74.5	56.4		99.5	96.9	83.9	73.2		-0.0492462	-0.0103199	-0.00834327	0.00956284		Q4/1994	88.9	105.3	74.5	56.4
Q1/1995	1995-03-31	84	104.2	73.6	56.9		94.6	95.9	83.2	73.9		0.0105708	0.00834202	0.00721154	0.00270636		Q1/1995	84	104.2	73.6	56.9
Q2/1995	1995-06-30	82.9	105.1	74.2	56.9		95.6	96.7	83.8	74.1		0.0041841	0.0041365	0.00119332	0.00944669		Q2/1995	82.9	105.1	74.2	56.9
Q3/1995	1995-09-30	84.3	105.5	74.4	57.5		96	97.1	83.9	74.8		0.0104167	0.00411946	0.011919	0.0013369		Q3/1995	84.3	105.5	74.4	57.5
Q4/1995	1995-12-31	85	105.9	74.8	57.4		97	97.5	84.9	74.9		-0.0247423	0.00615385	0.00942285	0.0146862		Q4/1995	85	105.9	74.8	57.4
Q1/1996	1996-03-31	82.6	106.6	74.7	58.1		94.6	98.1	85.7	76		-0.0433404	-0.00611621	0	0.0131579		Q1/1996	82.6	106.6	74.7	58.1
Q2/1996	1996-06-30	77.4	106	75	58.6		90.5	97.5	85.7	77		0.0198895	0.00512821	0.0105018	0.00779221		Q2/1996	77.4	106	75	58.6
Q3/1996	1996-09-30	80.2	106.4	76.2	58.9		92.3	98	86.6	77.6		0.00975081	0.0102041	0.00692841	0.0064433		Q3/1996	80.2	106.4	76.2	58.9
Q4/1996	1996-12-31	81.9	107.5	76.2	59.5		93.2	99	87.2	78.1		0.00643777	0.0030303	0.00802752	0.00896287		Q4/1996	81.9	107.5	76.2	59.5
Q1/1997	1997-03-31	81.9	108.1	76.3	61.1		93.8	99.3	87.9	78.8		0.0287846	-0.00100705	0.00682594	0.00888325		Q1/1997	81.9	108.1	76.3	61.1
Q2/1997	1997-06-30	83.4	107.5	77.6	61.8		96.5	99.2	88.5	79.5		0.00103627	0.00604839	-0.00338983	0.00880503		Q2/1997	83.4	107.5	77.6	61.8
Q3/1997	1997-09-30	83	108.1	76.6	62		96.6	99.8	88.2	80.2		-0.00414079	-0.00200401	0.0204082	0.0149626		Q3/1997	83	108.1	76.6	62
Q4/1997	1997-12-31	83.7	108.6	78.4	62.4		96.2	99.6	90	81.4		0.0218295	0.00903614	0.0288889	0.00982801		Q4/1997	83.7	108.6	78.4	62.4
Q1/1998	1998-03-31	85.2	109.6	79.9	63.1		98.3	100.5	92.6	82.2		0.0101729	0.000995025	-0.0442765	0.0109489		Q1/1998	85.2	109.6	79.9	63.1
Q2/1998	1998-06-30	85.9	109.5	77.6	64.2		99.3	100.6	88.5	83.1		-0.021148	0	0.00112994	0.0156438		Q2/1998	85.9	109.5	77.6	64.2
Q3/1998	1998-09-30	86.1	109	77.6	65.1		97.2	100.6	88.6	84.4		-0.00514403	-0.00198807	0.00451467	0.0118483		Q3/1998	86.1	109	77.6	65.1
Q4/1998	1998-12-31	86.4	108.9	78.4	65.9		96.7	100.4	89	85.4		0.0444674	0.00298805	0.0101124	0.00351288		Q4/1998	86.4	108.9	78.4	65.9
Q1/1999	1999-03-31	90.6	108.9	78.7	66.2		101	100.7	89.9	85.7		0	0.00297915	-0.0144605	0.0105018		Q1/1999	90.6	108.9	78.7	66.2
Q2/1999	1999-06-30	91.3	109.2	78.7	66.3		101	101	88.6	86.6		-0.0029703	0.0178218	0.0214447	0.0115473		Q2/1999	91.3	109.2	78.7	66.3
Q3/1999	1999-09-30	91.7	111.5	80	67.5		100.7	102.8	90.5	87.6		0.0109235	0.00291829	-0.00220994	0.0136986		Q3/1999	91.7	111.5	80	67.5
Q4/1999	1999-12-31	91.8	112.1	80	68.8		101.8	103.1	90.3	88.8		-0.00687623	0.00484966	0.0199336	0.0112613		Q4/1999	91.8	112.1	80	68.8
Q1/2000	2000-03-31	92.3	112.2	81.3	69.5		101.1	103.6	92.1	89.8		-0.0049456	0.00482625	-0.0249729	0.0122494		Q1/2000	92.3	112.2	81.3	69.5
Q2/2000	2000-06-30	92.8	112.6	80.3	69.9		100.6	104.1	89.8	90.9		0.00994036	-0.00384246	-0.0111359	0.0121012		Q2/2000	92.8	112.6	80.3	69.9
Q3/2000	2000-09-30	93.4	112.3	78.5	70.2		101.6	103.7	88.8	92		-0.0354331	0.00289296	0.0123874	0.00543478		Q3/2000	93.4	112.3	78.5	70.2
Q4/2000	2000-12-31	91.8	112.6	80	70.2		98	104	89.9	92.5		-0.0653061	0	0.0177976	0.012973		Q4/2000	91.8	112.6	80	70.2
Q1/2001	2001-03-31	87	112.1	79.8	71.5		91.6	104	91.5	93.7		-0.0152838	-0.0144231	0.00218579	0.00426894		Q1/2001	87	112.1	79.8	71.5
Q2/2001	2001-06-30	86.2	110.7	81.6	72.4		90.2	102.5	91.7	94.1		-0.00443459	-0.00097561	0.00654308	0.0063762		Q2/2001	86.2	110.7	81.6	72.4
Q3/2001	2001-09-30	87.6	110.7	81.4	73		89.8	102.4	92.3	94.7		0.0256125	-0.0185547	0.0108342	0.00739176		Q3/2001	87.6	110.7	81.4	73
Q4/2001	2001-12-31	88.5	109.2	83	73.5		92.1	100.5	93.3	95.4		0.0966341	0	0.0160772	0.00524109		Q4/2001	88.5	109.2	83	73.5
Q1/2002	2002-03-31	99.7	109.6	83.9	73.5		101	100.5	94.8	95.9		0.0158416	0	-0.00421941	0.00625652		Q1/2002	99.7	109.6	83.9	73.5
Q2/2002	2002-06-30	99.7	109.2	84.4	74.2		102.6	100.5	94.4	96.5		0.00194932	-0.00298507	0.0148305	0.00932642		Q2/2002	99.7	109.2	84.4	74.2
Q3/2002	2002-09-30	98	109.2	87.4	74.8		102.8	100.2	95.8	97.4		-0.0077821	0	0.0125261	0.00616016		Q3/2002	98	109.2	87.4	74.8
Q4/2002	2002-12-31	96.9	108.6	88.8	75.6		102	100.2	97	98		-0.022549	-0.00299401	0	0.00612245		Q4/2002	96.9	108.6	88.8	75.6
Q1/2003	2003-03-31	95	108.1	86.8	76.6		99.7	99.9	97	98.6		-0.00401204	-0.00500501	0.0195876	0.00709939		Q1/2003	95	108.1	86.8	76.6
Q2/2003	2003-06-30	95.2	107.9	89.1	77.5		99.3	99.4	98.9	99.3		0.00805639	0.00603622	0.0283114	0.0110775		Q2/2003	95.2	107.9	89.1	77.5
Q3/2003	2003-09-30	94.1	108.7	91.4	78.1		100.1	100	101.7	100.4		0.00799201	0.008	0.00688299	0.0129482		Q3/2003	94.1	108.7	91.4	78.1
Q4/2003	2003-12-31	93.3	109.3	93.8	78.6		100.9	100.8	102.4	101.7		-0.0178394	0.000992063	0.00390625	0.00786627		Q4/2003	93.3	109.3	93.8	78.6
Q1/2004	2004-03-31	93.7	109.7	96.9	78.8		99.1	100.9	102.8	102.5		-0.00807265	0.00396432	0.00583658	0.0107317		Q1/2004	93.7	109.7	96.9	78.8
Q2/2004	2004-06-30	92.5	110	95.2	79.3		98.3	101.3	103.4	103.6		0.0101729	-0.00987167	0.00967118	0.00675676		Q2/2004	92.5	110	95.2	79.3
Q3/2004	2004-09-30	92.3	108.2	94.6	79.7		99.3	100.3	104.4	104.3		-0.00100705	0.00299103	0.00957854	0.00671141		Q3/2004	92.3	108.2	94.6	79.7
Q4/2004	2004-12-31	90.4	109	93.6	79.9		99.2	100.6	105.4	105		0.0211694	-0.00994036	0.0056926	0.00571429		Q4/2004	90.4	109	93.6	79.9
Q1/2005	2005-03-31	100.6	108.2	94.3	80.9		101.3	99.6	106	105.6		0.0157947	-0.00401606	0.00377358	0.00662879		Q1/2005	100.6	108.2	94.3	80.9
Q2/2005	2005-06-30	99.6	109.4	93.6	82		102.9	99.2	106.4	106.3		0.00874636	-0.00705645	-0.0131579	0.0084666		Q2/2005	99.6	109.4	93.6	82
Q3/2005	2005-09-30	99.8	107.9	91.7	83.8		103.8	98.5	105	107.2		0.0134875	-0.00609137	-0.00190476	0.011194		Q3/2005	99.8	107.9	91.7	83.8
Q4/2005	2005-12-31	98.1	108.5	91.5	85.6		105.2	97.9	104.8	108.4		0.00380228	0.0102145	0.0114504	0.00922509		Q4/2005	98.1	108.5	91.5	85.6
Q1/2006	2006-03-31	94.4	109.4	92.4	85.5		105.6	98.9	106	109.4		0.00284091	-0.00101112	0	0.00914077		Q1/2006	94.4	109.4	92.4	85.5
Q2/2006	2006-06-30	93.1	108.9	93.1	85.6		105.9	98.8	106	110.4		0.0075543	0.00202429	0.00943396	0.00634058		Q2/2006	93.1	108.9	93.1	85.6
Q3/2006	2006-09-30	94.3	109.1	93.4	85.5		106.7	99	107	111.1		-0.00843486	-0.0020202	0.00934579	0.0117012		Q3/2006	94.3	109.1	93.4	85.5
Q4/2006	2006-12-31	92.4	109.2	95.1	85.8		105.8	98.8	108	112.4		0.0283554	-0.00101215	0.00277778	0.0106762		Q4/2006	92.4	109.2	95.1	85.8
Q1/2007	2007-03-31	90	109.5	96.3	86.8		108.8	98.7	108.3	113.6		-0.000919118	0.0070922	0.00461681	0.00880282		Q1/2007	90	109.5	96.3	86.8
Q2/2007	2007-06-30	90	109.6	95.8	87.7		108.7	99.4	108.8	114.6		0.00367985	0	0.00735294	0.008726		Q2/2007	90	109.6	95.8	87.7
Q3/2007	2007-09-30	90	109.1	94.4	88.7		109.1	99.4	109.6	115.6		0.0174152	0.00100604	0.00729927	0.00605536		Q3/2007	90	109.1	94.4	88.7
Q4/2007	2007-12-31	90.7	109.7	95.5	89.4		111	99.5	110.4	116.3		-1	-1	-1	-1		Q4/2007	90.7	109.7	95.5	89.4
Q1/2008	2008-03-31	100.1	109.3	96.5	89.9												Q1/2008	100.1	109.3	96.5	89.9
Q2/2008	2008-06-30	97.4	108.5	95.5	89.3												Q2/2008	97.4	108.5	95.5	89.3
Q3/2008	2008-09-30	95.6	107.2	92.8	88.1												Q3/2008	95.6	107.2	92.8	88.1
Q4/2008	2008-12-31	92.4	102.3	87.2	87												Q4/2008	92.4	102.3	87.2	87
Q1/2009	2009-03-31	91.6	97.4	81	86.2												Q1/2009	91.6	97.4	81	86.2
Q2/2009	2009-06-30	90.4	97.6	80	85.9												Q2/2009	90.4	97.6	80	85.9
Q3/2009	2009-09-30	90.2	96.6	81.4	86.1												Q3/2009	90.2	96.6	81.4	86.1
Q4/2009	2009-12-31	90.3	97.5	80.4	86.3												Q4/2009	90.3	97.5	80.4	86.3
Q1/2010	2010-03-31	89.5	99.2	84.3	86.3												Q1/2010	89.5	99.2	84.3	86.3
Q2/2010	2010-06-30	89.6	100.3	88.4	86.9												Q2/2010	89.6	100.3	88.4	86.9
Q3/2010	2010-09-30	90.8	100.6	90.1	87.5												Q3/2010	90.8	100.6	90.1	87.5
Q4/2010	2010-12-31	90.9	101.6	87.7	87.8												Q4/2010	90.9	101.6	87.7	87.8
Q1/2011	2011-03-31	100.6	100.9	89.1	88.4												Q1/2011	100.6	100.9	89.1	88.4
Q2/2011	2011-06-30	100.6	99.9	90.1	88.5												Q2/2011	100.6	99.9	90.1	88.5
Q3/2011	2011-09-30	100	99.4	89.5	88.7												Q3/2011	100	99.4	89.5	88.7
Q4/2011	2011-12-31	98.8	99	89.4	88.8												Q4/2011	98.8	99	89.4	88.8
Q1/2012	2012-03-31	94.6	98.5	86.4	90.1												Q1/2012	94.6	98.5	86.4	90.1
Q2/2012	2012-06-30	92.9	97.3	83	90.3												Q2/2012	92.9	97.3	83	90.3
Q3/2012	2012-09-30	92.8	97.5	81.7	91.6												Q3/2012	92.8	97.5	81.7	91.6
Q4/2012	2012-12-31	92.2	95.2	82.3	91.7												Q4/2012	92.2	95.2	82.3	91.7
Q1/2013	2013-03-31	92	95.5	82.1	92.1												Q1/2013	92	95.5	82.1	92.1
Q2/2013	2013-06-30	92.7	96.2	83.4	92.2												Q2/2013	92.7	96.2	83.4	92.2
Q3/2013	2013-09-30	94.1	96.8	85.8	92.8												Q3/2013	94.1	96.8	85.8	92.8
Q4/2013	2013-12-31	95.2	97.2	87	93.2												Q4/2013	95.2	97.2	87	93.2
Q1/2014	2014-03-31	102	97.4	89.2	94.1												Q1/2014	102	97.4	89.2	94.1
Q2/2014	2014-06-30	104.5	97.8	91.1	95.1												Q2/2014	104.5	97.8	91.1	95.1
Q3/2014	2014-09-30	105.6	98.1	93.7	96												Q3/2014	105.6	98.1	93.7	96
Q4/2014	2014-12-31	107.4	98.3	94.1	97												Q4/2014	107.4	98.3	94.1	97
Q1/2015	2015-03-31	106	98.8	95.1	97.2												Q1/2015	106	98.8	95.1	97.2
Q2/2015	2015-06-30	107	99.5	96.3	97.9												Q2/2015	107	99.5	96.3	97.9
Q3/2015	2015-09-30	106.3	99.2	95.7	98.3												Q3/2015	106.3	99.2	95.7	98.3
Q4/2015	2015-12-31	104.6	98.6	97.2	98.9												Q4/2015	104.6	98.6	97.2	98.9
Q1/2016	2016-03-31	100.7	98.7	97.5	99.3												Q1/2016	100.7	98.7	97.5	99.3
Q2/2016	2016-06-30	99.7	100.5	99.2	99.4												Q2/2016	99.7	100.5	99.2	99.4
Q3/2016	2016-09-30	99.5	100.1	100.2	100.2												Q3/2016	99.5	100.1	100.2	100.2
Q4/2016	2016-12-31	100.1	100.7	103.1	101												Q4/2016	100.1	100.7	103.1	101
Q1/2017	2017-03-31	102.1	101	106.4	101.4												Q1/2017	102.1	101	106.4	101.4
Q2/2017	2017-06-30	102.7	101.1	106.9	101.6												Q2/2017	102.7	101.1	106.9	101.6
Q3/2017	2017-09-30	103.5	102.2	107.3	102												Q3/2017	103.5	102.2	107.3	102
Q4/2017	2017-12-31	103.2	103	107.7	102.3												Q4/2017	103.2	103	107.7	102.3
Q1/2018	2018-03-31	101.7	103.4	106.8	102.6

## Sheet: France (Quarterly)
Q1/1960 !Q mag=bil	.excel_last	S132GAC@G10	S132GXC@G10	S132GSC@G10	S132GCOC@G10
.DESC		France: GVA: Agriculture, Forestry & Fishing (SWDA, Bil.Chn.2014.EUR)	France: GVA: Total Industry Less Construction (SWDA, Bil.Chn.2014.EUR)	France: GVA: Services (SWDA, Bil.Chn.2014.Euros)	France: GVA: Construction (SWDA, Bil.Chn.2014.EUR)
.T1		Q1-1949	Q1-1949	Q1-1949	Q1-1949
.TN		Q1-2018	Q1-2018	Q1-2018	Q1-2018
.LSOURCE		Institut National de la Statistique/Economique	Institut National de la Statistique/Economique	Institut National de la Statistique/Economique	Institut National de la Statistique/Economique			FINAL SERIES
.DTLM		Jun-22-2018 01:52	Jun-22-2018 01:52	Jun-22-2018 01:52	Jun-22-2018 01:52			PRIMARY	SECONDARY	CONSTRUCTION	TERTIARY
Q1/1960	1960-03-31	2.964	13.982	80.995	12.215		Q1/1960	2.964	13.982	12.215	68.78
Q2/1960	1960-06-30	3.241	14.417	82.454	12.302		Q2/1960	3.241	14.417	12.302	70.152
Q3/1960	1960-09-30	3.308	14.773	83.724	12.453		Q3/1960	3.308	14.773	12.453	71.271
Q4/1960	1960-12-31	3.328	14.673	85.176	12.712		Q4/1960	3.328	14.673	12.712	72.464
Q1/1961	1961-03-31	3.135	15.267	86.475	13.252		Q1/1961	3.135	15.267	13.252	73.223
Q2/1961	1961-06-30	3.082	15.171	87.591	13.507		Q2/1961	3.082	15.171	13.507	74.084
Q3/1961	1961-09-30	3.014	15.249	88.691	13.89		Q3/1961	3.014	15.249	13.89	74.801
Q4/1961	1961-12-31	2.941	15.575	89.758	14.156		Q4/1961	2.941	15.575	14.156	75.602
Q1/1962	1962-03-31	3.221	16.054	91.6	14.444		Q1/1962	3.221	16.054	14.444	77.156
Q2/1962	1962-06-30	3.257	16.136	92.736	14.618		Q2/1962	3.257	16.136	14.618	78.118
Q3/1962	1962-09-30	3.368	16.482	93.917	14.652		Q3/1962	3.368	16.482	14.652	79.265
Q4/1962	1962-12-31	3.407	16.81	95.027	14.489		Q4/1962	3.407	16.81	14.489	80.538
Q1/1963	1963-03-31	3.22	15.965	94.18	14.34		Q1/1963	3.22	15.965	14.34	79.84
Q2/1963	1963-06-30	3.139	18.132	98.402	15.065		Q2/1963	3.139	18.132	15.065	83.337
Q3/1963	1963-09-30	3.106	19.093	101.419	15.915		Q3/1963	3.106	19.093	15.915	85.504
Q4/1963	1963-12-31	3.109	18.746	101.39	15.685		Q4/1963	3.109	18.746	15.685	85.705
Q1/1964	1964-03-31	3.122	19.379	103.784	16.517		Q1/1964	3.122	19.379	16.517	87.267
Q2/1964	1964-06-30	3.162	19.016	105.009	16.837		Q2/1964	3.162	19.016	16.837	88.172
Q3/1964	1964-09-30	3.19	19.2	106.29	17.428		Q3/1964	3.19	19.2	17.428	88.862
Q4/1964	1964-12-31	3.232	19.369	107.931	18.213		Q4/1964	3.232	19.369	18.213	89.718
Q1/1965	1965-03-31	3.273	19.255	108.458	18.239		Q1/1965	3.273	19.255	18.239	90.219
Q2/1965	1965-06-30	3.299	20.157	109.852	18.318		Q2/1965	3.299	20.157	18.318	91.534
Q3/1965	1965-09-30	3.303	20.885	111.158	18.407		Q3/1965	3.303	20.885	18.407	92.751
Q4/1965	1965-12-31	3.274	21.198	112.727	19.01		Q4/1965	3.274	21.198	19.01	93.717
Q1/1966	1966-03-31	3.255	21.347	113.518	18.9		Q1/1966	3.255	21.347	18.9	94.618
Q2/1966	1966-06-30	3.249	21.649	115.456	19.31		Q2/1966	3.249	21.649	19.31	96.146
Q3/1966	1966-09-30	3.274	22.311	116.929	19.408		Q3/1966	3.274	22.311	19.408	97.521
Q4/1966	1966-12-31	3.309	22.24	117.9	19.55		Q4/1966	3.309	22.24	19.55	98.35
Q1/1967	1967-03-31	3.401	22.466	119.48	20.081		Q1/1967	3.401	22.466	20.081	99.399
Q2/1967	1967-06-30	3.5	22.376	121.039	20.476		Q2/1967	3.5	22.376	20.476	100.563
Q3/1967	1967-09-30	3.564	23.347	122.848	20.706		Q3/1967	3.564	23.347	20.706	102.142
Q4/1967	1967-12-31	3.645	23.592	124.276	20.391		Q4/1967	3.645	23.592	20.391	103.885
Q1/1968	1968-03-31	3.705	25.343	126.904	20.433		Q1/1968	3.705	25.343	20.433	106.471
Q2/1968	1968-06-30	3.682	20.193	124.303	19.831		Q2/1968	3.682	20.193	19.831	104.472
Q3/1968	1968-09-30	3.678	25.767	130.265	20.083		Q3/1968	3.678	25.767	20.083	110.182
Q4/1968	1968-12-31	3.649	26.304	131.764	20.03		Q4/1968	3.649	26.304	20.03	111.734
Q1/1969	1969-03-31	3.61	26.519	133.522	20.131		Q1/1969	3.61	26.519	20.131	113.391
Q2/1969	1969-06-30	3.582	26.797	135.99	20.325		Q2/1969	3.582	26.797	20.325	115.665
Q3/1969	1969-09-30	3.597	27.253	138.307	20.871		Q3/1969	3.597	27.253	20.871	117.436
Q4/1969	1969-12-31	3.617	27.429	140.181	21.933		Q4/1969	3.617	27.429	21.933	118.248
Q1/1970	1970-03-31	3.658	28.798	142.6	21.784		Q1/1970	3.658	28.798	21.784	120.816
Q2/1970	1970-06-30	3.69	29.212	144.86	22.454		Q2/1970	3.69	29.212	22.454	122.406
Q3/1970	1970-09-30	3.701	29.631	146.652	23.172		Q3/1970	3.701	29.631	23.172	123.48
Q4/1970	1970-12-31	3.697	30.391	148.521	23.135		Q4/1970	3.697	30.391	23.135	125.386
Q1/1971	1971-03-31	3.556	30.68	151.497	24.714		Q1/1971	3.556	30.68	24.714	126.783
Q2/1971	1971-06-30	3.615	31.149	152.851	24.668		Q2/1971	3.615	31.149	24.668	128.183
Q3/1971	1971-09-30	3.683	31.672	154.473	24.693		Q3/1971	3.683	31.672	24.693	129.78
Q4/1971	1971-12-31	3.868	31.856	155.609	24.317		Q4/1971	3.868	31.856	24.317	131.292
Q1/1972	1972-03-31	3.951	31.402	157.524	24.81		Q1/1972	3.951	31.402	24.81	132.714
Q2/1972	1972-06-30	3.859	32.319	159.604	25.381		Q2/1972	3.859	32.319	25.381	134.223
Q3/1972	1972-09-30	3.969	32.477	161.589	25.81		Q3/1972	3.969	32.477	25.81	135.779
Q4/1972	1972-12-31	4.099	32.773	163.726	26.01		Q4/1972	4.099	32.773	26.01	137.716
Q1/1973	1973-03-31	4.152	33.119	166.337	26.502		Q1/1973	4.152	33.119	26.502	139.835
Q2/1973	1973-06-30	4.3	34.23	168.972	26.934		Q2/1973	4.3	34.23	26.934	142.038
Q3/1973	1973-09-30	4.386	34.229	171.824	27.202		Q3/1973	4.386	34.229	27.202	144.622
Q4/1973	1973-12-31	4.215	34.403	174.88	27.418		Q4/1973	4.215	34.403	27.418	147.462
Q1/1974	1974-03-31	4.221	36.405	178.281	27.819		Q1/1974	4.221	36.405	27.819	150.462
Q2/1974	1974-06-30	4.083	36.869	180.916	28.02		Q2/1974	4.083	36.869	28.02	152.896
Q3/1974	1974-09-30	4.02	37.691	181.671	27.515		Q3/1974	4.02	37.691	27.515	154.156
Q4/1974	1974-12-31	4.027	36.079	181.142	27.806		Q4/1974	4.027	36.079	27.806	153.336
Q1/1975	1975-03-31	4.064	36.024	179.349	27.626		Q1/1975	4.064	36.024	27.626	151.723
Q2/1975	1975-06-30	3.855	34.763	178.775	27.063		Q2/1975	3.855	34.763	27.063	151.712
Q3/1975	1975-09-30	3.614	35.44	178.96	26.98		Q3/1975	3.614	35.44	26.98	151.98
Q4/1975	1975-12-31	3.821	36.6	180.942	26.749		Q4/1975	3.821	36.6	26.749	154.193
Q1/1976	1976-03-31	3.793	36.3	182.58	26.734		Q1/1976	3.793	36.3	26.734	155.846
Q2/1976	1976-06-30	3.901	36.971	184.39	27.197		Q2/1976	3.901	36.971	27.197	157.193
Q3/1976	1976-09-30	3.671	38.492	187.025	26.971		Q3/1976	3.671	38.492	26.971	160.054
Q4/1976	1976-12-31	3.549	38.481	188.915	27.251		Q4/1976	3.549	38.481	27.251	161.664
Q1/1977	1977-03-31	3.701	39.724	191.003	27.142		Q1/1977	3.701	39.724	27.142	163.861
Q2/1977	1977-06-30	3.727	39.1	192.741	27.362		Q2/1977	3.727	39.1	27.362	165.379
Q3/1977	1977-09-30	3.869	39.504	194.692	27.605		Q3/1977	3.869	39.504	27.605	167.087
Q4/1977	1977-12-31	3.96	40.069	196.221	27.521		Q4/1977	3.96	40.069	27.521	168.7
Q1/1978	1978-03-31	4.157	40.309	197.895	27.59		Q1/1978	4.157	40.309	27.59	170.305
Q2/1978	1978-06-30	4.25	40.037	199.262	27.415		Q2/1978	4.25	40.037	27.415	171.847
Q3/1978	1978-09-30	4.501	40.463	200.311	27.631		Q3/1978	4.501	40.463	27.631	172.68
Q4/1978	1978-12-31	4.58	40.726	201.715	27.319		Q4/1978	4.58	40.726	27.319	174.396
Q1/1979	1979-03-31	4.688	41.244	203.245	27.118		Q1/1979	4.688	41.244	27.118	176.127
Q2/1979	1979-06-30	4.688	41.03	203.976	26.866		Q2/1979	4.688	41.03	26.866	177.11
Q3/1979	1979-09-30	4.838	41.829	205.704	26.913		Q3/1979	4.838	41.829	26.913	178.791
Q4/1979	1979-12-31	4.757	40.886	207.219	27.255		Q4/1979	4.757	40.886	27.255	179.964
Q1/1980	1980-03-31	4.745	42.116	210.398	27.733		Q1/1980	4.745	42.116	27.733	182.665
Q2/1980	1980-06-30	4.704	41.423	210.323	27.485		Q2/1980	4.704	41.423	27.485	182.838
Q3/1980	1980-09-30	4.647	41.205	210.971	27.224		Q3/1980	4.647	41.205	27.224	183.747
Q4/1980	1980-12-31	4.559	40.924	211.382	26.922		Q4/1980	4.559	40.924	26.922	184.46
Q1/1981	1981-03-31	4.466	40.956	212.674	26.708		Q1/1981	4.466	40.956	26.708	185.966
Q2/1981	1981-06-30	4.492	40.918	214.179	26.767		Q2/1981	4.492	40.918	26.767	187.412
Q3/1981	1981-09-30	4.62	41.385	215.518	26.813		Q3/1981	4.62	41.385	26.813	188.705
Q4/1981	1981-12-31	4.869	41.289	216.123	27.073		Q4/1981	4.869	41.289	27.073	189.05
Q1/1982	1982-03-31	5.198	41.089	217.99	26.864		Q1/1982	5.198	41.089	26.864	191.126
Q2/1982	1982-06-30	5.427	41.228	219.298	26.974		Q2/1982	5.427	41.228	26.974	192.324
Q3/1982	1982-09-30	5.494	40.845	219.833	26.732		Q3/1982	5.494	40.845	26.732	193.101
Q4/1982	1982-12-31	5.394	41.318	221.014	26.263		Q4/1982	5.394	41.318	26.263	194.751
Q1/1983	1983-03-31	5.178	41.716	222.135	26.401		Q1/1983	5.178	41.716	26.401	195.734
Q2/1983	1983-06-30	5.014	42.098	221.938	26.039		Q2/1983	5.014	42.098	26.039	195.899
Q3/1983	1983-09-30	4.932	42.088	222.858	25.798		Q3/1983	4.932	42.088	25.798	197.06
Q4/1983	1983-12-31	4.966	42.08	224.412	25.479		Q4/1983	4.966	42.08	25.479	198.933
Q1/1984	1984-03-31	5.085	42.404	225.2	25.466		Q1/1984	5.085	42.404	25.466	199.734
Q2/1984	1984-06-30	5.209	42.156	226.589	25.125		Q2/1984	5.209	42.156	25.125	201.464
Q3/1984	1984-09-30	5.303	42.234	228.086	24.844		Q3/1984	5.303	42.234	24.844	203.242
Q4/1984	1984-12-31	5.429	42.421	228.283	24.7		Q4/1984	5.429	42.421	24.7	203.583
Q1/1985	1985-03-31	5.494	42.567	228.125	24.377		Q1/1985	5.494	42.567	24.377	203.748
Q2/1985	1985-06-30	5.559	42.793	229.883	24.722		Q2/1985	5.559	42.793	24.722	205.161
Q3/1985	1985-09-30	5.605	43.149	231.154	25.16		Q3/1985	5.605	43.149	25.16	205.994
Q4/1985	1985-12-31	5.597	42.955	232.519	25.343		Q4/1985	5.597	42.955	25.343	207.176
Q1/1986	1986-03-31	5.554	42.726	233.932	25.474		Q1/1986	5.554	42.726	25.474	208.458
Q2/1986	1986-06-30	5.526	43.062	236.405	25.929		Q2/1986	5.526	43.062	25.929	210.476
Q3/1986	1986-09-30	5.576	42.849	237.618	26.009		Q3/1986	5.576	42.849	26.009	211.609
Q4/1986	1986-12-31	5.628	42.532	238.789	26.042		Q4/1986	5.628	42.532	26.042	212.747
Q1/1987	1987-03-31	5.704	42.698	238.945	25.799		Q1/1987	5.704	42.698	25.799	213.146
Q2/1987	1987-06-30	5.754	43.034	241.491	26.021		Q2/1987	5.754	43.034	26.021	215.47
Q3/1987	1987-09-30	5.773	43.251	243.225	26.466		Q3/1987	5.773	43.251	26.466	216.759
Q4/1987	1987-12-31	5.734	43.834	246.819	26.842		Q4/1987	5.734	43.834	26.842	219.977
Q1/1988	1988-03-31	5.681	44.581	249.912	27.522		Q1/1988	5.681	44.581	27.522	222.39
Q2/1988	1988-06-30	5.624	44.594	252.079	27.976		Q2/1988	5.624	44.594	27.976	224.103
Q3/1988	1988-09-30	5.642	45.264	255.287	28.175		Q3/1988	5.642	45.264	28.175	227.112
Q4/1988	1988-12-31	5.656	45.659	257.822	28.426		Q4/1988	5.656	45.659	28.426	229.396
Q1/1989	1989-03-31	5.683	46.209	262.142	28.508		Q1/1989	5.683	46.209	28.508	233.634
Q2/1989	1989-06-30	5.786	46.594	264.571	28.769		Q2/1989	5.786	46.594	28.769	235.802
Q3/1989	1989-09-30	5.912	47.345	267.407	28.998		Q3/1989	5.912	47.345	28.998	238.409
Q4/1989	1989-12-31	6.121	48.233	269.768	29.431		Q4/1989	6.121	48.233	29.431	240.337
Q1/1990	1990-03-31	6.32	48.37	271.596	29.924		Q1/1990	6.32	48.37	29.924	241.672
Q2/1990	1990-06-30	6.409	49.14	272.341	30.189		Q2/1990	6.409	49.14	30.189	242.152
Q3/1990	1990-09-30	6.298	49.267	273.518	30.309		Q3/1990	6.298	49.267	30.309	243.209
Q4/1990	1990-12-31	6.059	49.347	275.182	30.412		Q4/1990	6.059	49.347	30.412	244.77
Q1/1991	1991-03-31	5.736	49.35	274.893	30.009		Q1/1991	5.736	49.35	30.009	244.884
Q2/1991	1991-06-30	5.552	49.501	277.344	30.103		Q2/1991	5.552	49.501	30.103	247.241
Q3/1991	1991-09-30	5.607	49.476	278.041	30.328		Q3/1991	5.607	49.476	30.328	247.713
Q4/1991	1991-12-31	5.847	49.691	279.584	30.362		Q4/1991	5.847	49.691	30.362	249.222
Q1/1992	1992-03-31	6.272	50.169	281.644	31.107		Q1/1992	6.272	50.169	31.107	250.537
Q2/1992	1992-06-30	6.547	50.045	281.799	31.034		Q2/1992	6.547	50.045	31.034	250.765
Q3/1992	1992-09-30	6.656	49.652	282.176	30.903		Q3/1992	6.656	49.652	30.903	251.273
Q4/1992	1992-12-31	6.573	49.417	281.908	30.325		Q4/1992	6.573	49.417	30.325	251.583
Q1/1993	1993-03-31	6.334	48.772	281.066	29.727		Q1/1993	6.334	48.772	29.727	251.339
Q2/1993	1993-06-30	6.107	48.627	281.938	28.771		Q2/1993	6.107	48.627	28.771	253.167
Q3/1993	1993-09-30	6.044	48.662	282.316	28.086		Q3/1993	6.044	48.662	28.086	254.23
Q4/1993	1993-12-31	6.009	48.693	282.751	27.592		Q4/1993	6.009	48.693	27.592	255.159
Q1/1994	1994-03-31	6.063	48.757	284.6	27.657		Q1/1994	6.063	48.757	27.657	256.943
Q2/1994	1994-06-30	6.106	49.912	286.749	27.882		Q2/1994	6.106	49.912	27.882	258.867
Q3/1994	1994-09-30	6.19	50.177	288.092	27.818		Q3/1994	6.19	50.177	27.818	260.274
Q4/1994	1994-12-31	6.277	51.071	290.422	28.082		Q4/1994	6.277	51.071	28.082	262.34
Q1/1995	1995-03-31	6.269	51.97	291.471	28.394		Q1/1995	6.269	51.97	28.394	263.077
Q2/1995	1995-06-30	6.375	51.923	292.854	28.386		Q2/1995	6.375	51.923	28.386	264.468
Q3/1995	1995-09-30	6.464	52.258	293.236	28.072		Q3/1995	6.464	52.258	28.072	265.164
Q4/1995	1995-12-31	6.601	52.309	293.412	27.824		Q4/1995	6.601	52.309	27.824	265.588
Q1/1996	1996-03-31	6.727	52.826	294.818	27.396		Q1/1996	6.727	52.826	27.396	267.422
Q2/1996	1996-06-30	6.826	53.09	295.436	27.091		Q2/1996	6.826	53.09	27.091	268.345
Q3/1996	1996-09-30	6.926	53.066	297.235	26.835		Q3/1996	6.926	53.066	26.835	270.4
Q4/1996	1996-12-31	6.917	53.06	297.884	26.518		Q4/1996	6.917	53.06	26.518	271.366
Q1/1997	1997-03-31	6.865	53.201	299.078	26.27		Q1/1997	6.865	53.201	26.27	272.808
Q2/1997	1997-06-30	6.829	54.319	301.882	26.133		Q2/1997	6.829	54.319	26.133	275.749
Q3/1997	1997-09-30	6.838	55.087	303.541	25.963		Q3/1997	6.838	55.087	25.963	277.578
Q4/1997	1997-12-31	6.843	56.047	306.415	25.905		Q4/1997	6.843	56.047	25.905	280.51
Q1/1998	1998-03-31	6.94	56.899	309.155	25.81		Q1/1998	6.94	56.899	25.81	283.345
Q2/1998	1998-06-30	6.994	57.753	311.241	25.91		Q2/1998	6.994	57.753	25.91	285.331
Q3/1998	1998-09-30	7.095	58.057	313.591	26.165		Q3/1998	7.095	58.057	26.165	287.426
Q4/1998	1998-12-31	7.203	58.64	315.779	26.359		Q4/1998	7.203	58.64	26.359	289.42
Q1/1999	1999-03-31	7.313	58.661	318.227	26.619		Q1/1999	7.313	58.661	26.619	291.608
Q2/1999	1999-06-30	7.394	59.326	320.251	26.839		Q2/1999	7.394	59.326	26.839	293.412
Q3/1999	1999-09-30	7.474	59.896	323.955	27.244		Q3/1999	7.474	59.896	27.244	296.711
Q4/1999	1999-12-31	7.472	61.289	327.77	27.71		Q4/1999	7.472	61.289	27.71	300.06
Q1/2000	2000-03-31	7.476	62.133	330.613	28.393		Q1/2000	7.476	62.133	28.393	302.22
Q2/2000	2000-06-30	7.4	62.677	334.204	28.767		Q2/2000	7.4	62.677	28.767	305.437
Q3/2000	2000-09-30	7.339	62.925	336.599	28.989		Q3/2000	7.339	62.925	28.989	307.61
Q4/2000	2000-12-31	7.181	63.701	339.632	29.314		Q4/2000	7.181	63.701	29.314	310.318
Q1/2001	2001-03-31	7.039	64.082	341.492	29.918		Q1/2001	7.039	64.082	29.918	311.574
Q2/2001	2001-06-30	6.994	64.098	342.275	30.044		Q2/2001	6.994	64.098	30.044	312.231
Q3/2001	2001-09-30	7.13	64.348	343.144	30.021		Q3/2001	7.13	64.348	30.021	313.123
Q4/2001	2001-12-31	7.388	63.678	343.601	30.006		Q4/2001	7.388	63.678	30.006	313.595
Q1/2002	2002-03-31	7.675	63.886	344.397	30.06		Q1/2002	7.675	63.886	30.06	314.337
Q2/2002	2002-06-30	7.758	64.642	345.468	29.908		Q2/2002	7.758	64.642	29.908	315.56
Q3/2002	2002-09-30	7.599	64.889	346.829	29.748		Q3/2002	7.599	64.889	29.748	317.081
Q4/2002	2002-12-31	7.145	64.697	347.584	29.699		Q4/2002	7.145	64.697	29.699	317.885
Q1/2003	2003-03-31	6.504	65.71	347.659	29.69		Q1/2003	6.504	65.71	29.69	317.969
Q2/2003	2003-06-30	6.201	65.244	347.582	29.689		Q2/2003	6.201	65.244	29.689	317.893
Q3/2003	2003-09-30	6.239	65.436	349.854	29.803		Q3/2003	6.239	65.436	29.803	320.051
Q4/2003	2003-12-31	6.631	66.621	352.088	29.898		Q4/2003	6.631	66.621	29.898	322.19
Q1/2004	2004-03-31	7.268	67.015	355.113	30.122		Q1/2004	7.268	67.015	30.122	324.991
Q2/2004	2004-06-30	7.781	66.982	357.179	30.273		Q2/2004	7.781	66.982	30.273	326.906
Q3/2004	2004-09-30	8.02	67.01	358.765	30.31		Q3/2004	8.02	67.01	30.31	328.455
Q4/2004	2004-12-31	7.93	67.275	361.208	30.595		Q4/2004	7.93	67.275	30.595	330.613
Q1/2005	2005-03-31	7.579	67.566	362.066	30.835		Q1/2005	7.579	67.566	30.835	331.231
Q2/2005	2005-06-30	7.282	67.386	363.333	31.133		Q2/2005	7.282	67.386	31.133	332.2
Q3/2005	2005-09-30	7.172	67.436	365.517	31.345		Q3/2005	7.172	67.436	31.345	334.172
Q4/2005	2005-12-31	7.177	67.995	368.134	31.377		Q4/2005	7.177	67.995	31.377	336.757
Q1/2006	2006-03-31	7.246	68.391	371.417	31.394		Q1/2006	7.246	68.391	31.394	340.023
Q2/2006	2006-06-30	7.323	69.209	375.111	31.838		Q2/2006	7.323	69.209	31.838	343.273
Q3/2006	2006-09-30	7.368	68.937	375.462	32.064		Q3/2006	7.368	68.937	32.064	343.398
Q4/2006	2006-12-31	7.351	69.243	378.545	32.497		Q4/2006	7.351	69.243	32.497	346.048
Q1/2007	2007-03-31	7.275	70.119	381.884	33.136		Q1/2007	7.275	70.119	33.136	348.748
Q2/2007	2007-06-30	7.231	70.614	384.928	33.412		Q2/2007	7.231	70.614	33.412	351.516
Q3/2007	2007-09-30	7.245	70.339	386.73	33.527		Q3/2007	7.245	70.339	33.527	353.203
Q4/2007	2007-12-31	7.301	69.916	388.376	33.559		Q4/2007	7.301	69.916	33.559	354.817
Q1/2008	2008-03-31	7.413	69.347	391.506	33.581		Q1/2008	7.413	69.347	33.581	357.925
Q2/2008	2008-06-30	7.468	68.234	390.607	33.135		Q2/2008	7.468	68.234	33.135	357.472
Q3/2008	2008-09-30	7.65	67.432	390.088	32.663		Q3/2008	7.65	67.432	32.663	357.425
Q4/2008	2008-12-31	7.801	64.949	386.169	32.196		Q4/2008	7.801	64.949	32.196	353.973
Q1/2009	2009-03-31	8.022	62.559	381.167	31.64		Q1/2009	8.022	62.559	31.64	349.527
Q2/2009	2009-06-30	8.137	63.032	380.222	31.115		Q2/2009	8.137	63.032	31.115	349.107
Q3/2009	2009-09-30	8.137	63.983	380.492	30.75		Q3/2009	8.137	63.983	30.75	349.742
Q4/2009	2009-12-31	8.034	64.488	382.89	30.5		Q4/2009	8.034	64.488	30.5	352.39
Q1/2010	2010-03-31	7.825	64.243	384.6	30.203		Q1/2010	7.825	64.243	30.203	354.397
Q2/2010	2010-06-30	7.733	64.478	386.599	30.132		Q2/2010	7.733	64.478	30.132	356.467
Q3/2010	2010-09-30	7.764	64.448	388.814	30.285		Q3/2010	7.764	64.448	30.285	358.529
Q4/2010	2010-12-31	7.899	65.02	391.31	30.249		Q4/2010	7.899	65.02	30.249	361.061
Q1/2011	2011-03-31	8.098	66.442	394.59	30.003		Q1/2011	8.098	66.442	30.003	364.587
Q2/2011	2011-06-30	8.179	66.335	395.396	29.915		Q2/2011	8.179	66.335	29.915	365.481
Q3/2011	2011-09-30	8.18	66.323	396.613	29.476		Q3/2011	8.18	66.323	29.476	367.137
Q4/2011	2011-12-31	8.019	66.83	397.651	29.22		Q4/2011	8.019	66.83	29.22	368.431
Q1/2012	2012-03-31	7.731	67.079	398.507	28.61		Q1/2012	7.731	67.079	28.61	369.897
Q2/2012	2012-06-30	7.496	66.943	398.886	28.163		Q2/2012	7.496	66.943	28.163	370.723
Q3/2012	2012-09-30	7.316	67.409	399.453	27.927		Q3/2012	7.316	67.409	27.927	371.526
Q4/2012	2012-12-31	7.193	67.023	399.865	27.907		Q4/2012	7.193	67.023	27.907	371.958
Q1/2013	2013-03-31	7.115	66.85	399.753	28.207		Q1/2013	7.115	66.85	28.207	371.546
Q2/2013	2013-06-30	7.142	67.92	401.844	28.393		Q2/2013	7.142	67.92	28.393	373.451
Q3/2013	2013-09-30	7.321	67.655	402.198	28.355		Q3/2013	7.321	67.655	28.355	373.843
Q4/2013	2013-12-31	7.594	67.878	403.848	28.19		Q4/2013	7.594	67.878	28.19	375.658
Q1/2014	2014-03-31	7.981	67.794	404.346	27.825		Q1/2014	7.981	67.794	27.825	376.521
Q2/2014	2014-06-30	8.302	68.08	405.018	27.559		Q2/2014	8.302	68.08	27.559	377.459
Q3/2014	2014-09-30	8.538	68.287	406.701	27.413		Q3/2014	8.538	68.287	27.413	379.288
Q4/2014	2014-12-31	8.639	67.711	407.452	27.329		Q4/2014	8.639	67.711	27.329	380.123
Q1/2015	2015-03-31	8.646	68.118	408.562	27.494		Q1/2015	8.646	68.118	27.494	381.068
Q2/2015	2015-06-30	8.55	67.804	408.567	27.348		Q2/2015	8.55	67.804	27.348	381.219
Q3/2015	2015-09-30	8.335	68.185	409.946	27.335		Q3/2015	8.335	68.185	27.335	382.611
Q4/2015	2015-12-31	7.977	68.31	411.482	27.311		Q4/2015	7.977	68.31	27.311	384.171
Q1/2016	2016-03-31	7.571	68.739	414.639	27.104		Q1/2016	7.571	68.739	27.104	387.535
Q2/2016	2016-06-30	7.309	68.735	413.686	26.93		Q2/2016	7.309	68.735	26.93	386.756
Q3/2016	2016-09-30	7.208	68.642	414.824	26.803		Q3/2016	7.208	68.642	26.803	388.021
Q4/2016	2016-12-31	7.281	69.097	416.965	27.078		Q4/2016	7.281	69.097	27.078	389.887
Q1/2017	2017-03-31	7.482	69.282	420.201	27.321		Q1/2017	7.482	69.282	27.321	392.88
Q2/2017	2017-06-30	7.673	69.601	422.837	27.611		Q2/2017	7.673	69.601	27.611	395.226
Q3/2017	2017-09-30	7.786	70.189	425.612	27.796		Q3/2017	7.786	70.189	27.796	397.816
Q4/2017	2017-12-31	7.851	70.94	428.599	27.859		Q4/2017	7.851	70.94	27.859	400.74
Q1/2018	2018-03-31	7.806	70.653	430.026	27.913

## Sheet: Germany (Quarterly)
Q1/1960 !Q mag=bil	.excel_last	S134GAC@G10	S134G2XC@G10	S134GCOC@G10	S134GWOC@G10	S134GIJC@G10	S134GFIC@G10	S134GRRC@G10	S134GBC@G10	S134GGQC@G10	S134GCRC@G10		S134GAFQ@G1008	S134GXQ@G1008	S134GCOQ@G1008	S134GTHQ@G1008	S134GFBQ@G1008	S134GGOQ@G1008
.DESC		Germany: Gross Value Added: Agric, Forestry & Fishing (SWDA, Bil.Chn.2010.EUR)	Germany: GVA: Total Industry ex Construction (SWDA, Bil.Chn.2010.Euros)	Germany: Gross Value Added: Construction (SWDA, Bil.Chn.2010.Euros)	Germany: Gross Value Added: Trade/Transp/Hospitality (SWDA, Bil.Chn.2010.EUR)	Germany: Gross Value Added: Information & Communication (SWDA, Bil.Chn.2010.EUR)	Germany: Gr Value Added: Provision of Financial/Ins Srvs(SWDA, Bil.Chn.2010.EUR)	Germany: Gr Value Added: Real Estate/Renting/Bus Activs (SWDA, Bil.Chn.2010.EUR)	Germany: Gross Value Added: Business Services(SWDA, Bil.Chn.2010.EUR)	Germany: Gross Value Added: Pub Svc, Education, Health (SWDA, Bil.Chn.2010.EUR)	Germany: Gr Val Added: Art/Entertnmnt/Recreatn/Oth Svcs (SWDA, Bil.Chn.2010.EUR)		Germany: GVA: Agriculture, Forestry & Fishing (SA/WDA, 2000=100)	Germany: GVA: Total Industry ex Construction (SA/WDA, 2000=100)	Germany: Gross Value Added: Construction (SA/WDA, 2000=100)	Germany: Gross Value Added: Trade, Hotels & Transport (SA/WDA, 2000=100)	Germany: Gross Value Added: Finance & Business Services (SA/WDA, 2000=100)	Germany: Gross Value Added: Public & Personal Services (SA/WDA, 2000=100)
.T1		Q1-1991	Q1-1970	Q1-1991	Q1-1991	Q1-1991	Q1-1991	Q1-1991	Q1-1991	Q1-1991	Q1-1991		Q1-1970	Q1-1970	Q1-1970	Q1-1970	Q1-1970	Q1-1970
.TN		Q1-2018	Q1-2018	Q1-2018	Q1-2018	Q1-2018	Q1-2018	Q1-2018	Q1-2018	Q1-2018	Q1-2018		Q4-2007	Q4-2007	Q4-2007	Q4-2007	Q4-2007	Q4-2007
.LSOURCE		Deutsche Bundesbank	Deutsche Bundesbank	Deutsche Bundesbank	Deutsche Bundesbank	Deutsche Bundesbank	Deutsche Bundesbank	Deutsche Bundesbank	Deutsche Bundesbank	Deutsche Bundesbank	Deutsche Bundesbank		Statistisches Bundesamt	Statistisches Bundesamt	Statistisches Bundesamt	Statistisches Bundesamt	Statistisches Bundesamt	Statistisches Bundesamt		HISTORICAL SERIES GROWTH RATE						FINAL SERIES
.DTLM		May-24-2018 01:20	May-24-2018 01:20	May-24-2018 01:20	May-24-2018 01:20	May-24-2018 01:20	May-24-2018 01:20	May-24-2018 01:20	May-24-2018 01:20	May-24-2018 01:20	May-24-2018 01:20		Feb-26-2008 01:44	Feb-26-2008 01:13	Feb-26-2008 01:13	Feb-26-2008 01:13	Feb-26-2008 01:13	Feb-26-2008 01:13		PRIMARY	SECONDARY	CONSTRUCTION	TERTIARY			PRIMARY	SECONDARY	CONSTRUCTION	TERTIARY
Q1/1960	1960-03-31	#N/A	#N/A	#N/A	#N/A	#N/A	#N/A	#N/A	#N/A	#N/A	#N/A		#N/A	#N/A	#N/A	#N/A	#N/A	#N/A		#N/A	#N/A	#N/A	#N/A		Q1/1960	#N/A	#N/A	#N/A	#N/A
Q2/1960	1960-06-30	#N/A	#N/A	#N/A	#N/A	#N/A	#N/A	#N/A	#N/A	#N/A	#N/A		#N/A	#N/A	#N/A	#N/A	#N/A	#N/A		#N/A	#N/A	#N/A	#N/A		Q2/1960	#N/A	#N/A	#N/A	#N/A
Q3/1960	1960-09-30	#N/A	#N/A	#N/A	#N/A	#N/A	#N/A	#N/A	#N/A	#N/A	#N/A		#N/A	#N/A	#N/A	#N/A	#N/A	#N/A		#N/A	#N/A	#N/A	#N/A		Q3/1960	#N/A	#N/A	#N/A	#N/A
Q4/1960	1960-12-31	#N/A	#N/A	#N/A	#N/A	#N/A	#N/A	#N/A	#N/A	#N/A	#N/A		#N/A	#N/A	#N/A	#N/A	#N/A	#N/A		#N/A	#N/A	#N/A	#N/A		Q4/1960	#N/A	#N/A	#N/A	#N/A
Q1/1961	1961-03-31	#N/A	#N/A	#N/A	#N/A	#N/A	#N/A	#N/A	#N/A	#N/A	#N/A		#N/A	#N/A	#N/A	#N/A	#N/A	#N/A		#N/A	#N/A	#N/A	#N/A		Q1/1961	#N/A	#N/A	#N/A	#N/A
Q2/1961	1961-06-30	#N/A	#N/A	#N/A	#N/A	#N/A	#N/A	#N/A	#N/A	#N/A	#N/A		#N/A	#N/A	#N/A	#N/A	#N/A	#N/A		#N/A	#N/A	#N/A	#N/A		Q2/1961	#N/A	#N/A	#N/A	#N/A
Q3/1961	1961-09-30	#N/A	#N/A	#N/A	#N/A	#N/A	#N/A	#N/A	#N/A	#N/A	#N/A		#N/A	#N/A	#N/A	#N/A	#N/A	#N/A		#N/A	#N/A	#N/A	#N/A		Q3/1961	#N/A	#N/A	#N/A	#N/A
Q4/1961	1961-12-31	#N/A	#N/A	#N/A	#N/A	#N/A	#N/A	#N/A	#N/A	#N/A	#N/A		#N/A	#N/A	#N/A	#N/A	#N/A	#N/A		#N/A	#N/A	#N/A	#N/A		Q4/1961	#N/A	#N/A	#N/A	#N/A
Q1/1962	1962-03-31	#N/A	#N/A	#N/A	#N/A	#N/A	#N/A	#N/A	#N/A	#N/A	#N/A		#N/A	#N/A	#N/A	#N/A	#N/A	#N/A		#N/A	#N/A	#N/A	#N/A		Q1/1962	#N/A	#N/A	#N/A	#N/A
Q2/1962	1962-06-30	#N/A	#N/A	#N/A	#N/A	#N/A	#N/A	#N/A	#N/A	#N/A	#N/A		#N/A	#N/A	#N/A	#N/A	#N/A	#N/A		#N/A	#N/A	#N/A	#N/A		Q2/1962	#N/A	#N/A	#N/A	#N/A
Q3/1962	1962-09-30	#N/A	#N/A	#N/A	#N/A	#N/A	#N/A	#N/A	#N/A	#N/A	#N/A		#N/A	#N/A	#N/A	#N/A	#N/A	#N/A		#N/A	#N/A	#N/A	#N/A		Q3/1962	#N/A	#N/A	#N/A	#N/A
Q4/1962	1962-12-31	#N/A	#N/A	#N/A	#N/A	#N/A	#N/A	#N/A	#N/A	#N/A	#N/A		#N/A	#N/A	#N/A	#N/A	#N/A	#N/A		#N/A	#N/A	#N/A	#N/A		Q4/1962	#N/A	#N/A	#N/A	#N/A
Q1/1963	1963-03-31	#N/A	#N/A	#N/A	#N/A	#N/A	#N/A	#N/A	#N/A	#N/A	#N/A		#N/A	#N/A	#N/A	#N/A	#N/A	#N/A		#N/A	#N/A	#N/A	#N/A		Q1/1963	#N/A	#N/A	#N/A	#N/A
Q2/1963	1963-06-30	#N/A	#N/A	#N/A	#N/A	#N/A	#N/A	#N/A	#N/A	#N/A	#N/A		#N/A	#N/A	#N/A	#N/A	#N/A	#N/A		#N/A	#N/A	#N/A	#N/A		Q2/1963	#N/A	#N/A	#N/A	#N/A
Q3/1963	1963-09-30	#N/A	#N/A	#N/A	#N/A	#N/A	#N/A	#N/A	#N/A	#N/A	#N/A		#N/A	#N/A	#N/A	#N/A	#N/A	#N/A		#N/A	#N/A	#N/A	#N/A		Q3/1963	#N/A	#N/A	#N/A	#N/A
Q4/1963	1963-12-31	#N/A	#N/A	#N/A	#N/A	#N/A	#N/A	#N/A	#N/A	#N/A	#N/A		#N/A	#N/A	#N/A	#N/A	#N/A	#N/A		#N/A	#N/A	#N/A	#N/A		Q4/1963	#N/A	#N/A	#N/A	#N/A
Q1/1964	1964-03-31	#N/A	#N/A	#N/A	#N/A	#N/A	#N/A	#N/A	#N/A	#N/A	#N/A		#N/A	#N/A	#N/A	#N/A	#N/A	#N/A		#N/A	#N/A	#N/A	#N/A		Q1/1964	#N/A	#N/A	#N/A	#N/A
Q2/1964	1964-06-30	#N/A	#N/A	#N/A	#N/A	#N/A	#N/A	#N/A	#N/A	#N/A	#N/A		#N/A	#N/A	#N/A	#N/A	#N/A	#N/A		#N/A	#N/A	#N/A	#N/A		Q2/1964	#N/A	#N/A	#N/A	#N/A
Q3/1964	1964-09-30	#N/A	#N/A	#N/A	#N/A	#N/A	#N/A	#N/A	#N/A	#N/A	#N/A		#N/A	#N/A	#N/A	#N/A	#N/A	#N/A		#N/A	#N/A	#N/A	#N/A		Q3/1964	#N/A	#N/A	#N/A	#N/A
Q4/1964	1964-12-31	#N/A	#N/A	#N/A	#N/A	#N/A	#N/A	#N/A	#N/A	#N/A	#N/A		#N/A	#N/A	#N/A	#N/A	#N/A	#N/A		#N/A	#N/A	#N/A	#N/A		Q4/1964	#N/A	#N/A	#N/A	#N/A
Q1/1965	1965-03-31	#N/A	#N/A	#N/A	#N/A	#N/A	#N/A	#N/A	#N/A	#N/A	#N/A		#N/A	#N/A	#N/A	#N/A	#N/A	#N/A		#N/A	#N/A	#N/A	#N/A		Q1/1965	#N/A	#N/A	#N/A	#N/A
Q2/1965	1965-06-30	#N/A	#N/A	#N/A	#N/A	#N/A	#N/A	#N/A	#N/A	#N/A	#N/A		#N/A	#N/A	#N/A	#N/A	#N/A	#N/A		#N/A	#N/A	#N/A	#N/A		Q2/1965	#N/A	#N/A	#N/A	#N/A
Q3/1965	1965-09-30	#N/A	#N/A	#N/A	#N/A	#N/A	#N/A	#N/A	#N/A	#N/A	#N/A		#N/A	#N/A	#N/A	#N/A	#N/A	#N/A		#N/A	#N/A	#N/A	#N/A		Q3/1965	#N/A	#N/A	#N/A	#N/A
Q4/1965	1965-12-31	#N/A	#N/A	#N/A	#N/A	#N/A	#N/A	#N/A	#N/A	#N/A	#N/A		#N/A	#N/A	#N/A	#N/A	#N/A	#N/A		#N/A	#N/A	#N/A	#N/A		Q4/1965	#N/A	#N/A	#N/A	#N/A
Q1/1966	1966-03-31	#N/A	#N/A	#N/A	#N/A	#N/A	#N/A	#N/A	#N/A	#N/A	#N/A		#N/A	#N/A	#N/A	#N/A	#N/A	#N/A		#N/A	#N/A	#N/A	#N/A		Q1/1966	#N/A	#N/A	#N/A	#N/A
Q2/1966	1966-06-30	#N/A	#N/A	#N/A	#N/A	#N/A	#N/A	#N/A	#N/A	#N/A	#N/A		#N/A	#N/A	#N/A	#N/A	#N/A	#N/A		#N/A	#N/A	#N/A	#N/A		Q2/1966	#N/A	#N/A	#N/A	#N/A
Q3/1966	1966-09-30	#N/A	#N/A	#N/A	#N/A	#N/A	#N/A	#N/A	#N/A	#N/A	#N/A		#N/A	#N/A	#N/A	#N/A	#N/A	#N/A		#N/A	#N/A	#N/A	#N/A		Q3/1966	#N/A	#N/A	#N/A	#N/A
Q4/1966	1966-12-31	#N/A	#N/A	#N/A	#N/A	#N/A	#N/A	#N/A	#N/A	#N/A	#N/A		#N/A	#N/A	#N/A	#N/A	#N/A	#N/A		#N/A	#N/A	#N/A	#N/A		Q4/1966	#N/A	#N/A	#N/A	#N/A
Q1/1967	1967-03-31	#N/A	#N/A	#N/A	#N/A	#N/A	#N/A	#N/A	#N/A	#N/A	#N/A		#N/A	#N/A	#N/A	#N/A	#N/A	#N/A		#N/A	#N/A	#N/A	#N/A		Q1/1967	#N/A	#N/A	#N/A	#N/A
Q2/1967	1967-06-30	#N/A	#N/A	#N/A	#N/A	#N/A	#N/A	#N/A	#N/A	#N/A	#N/A		#N/A	#N/A	#N/A	#N/A	#N/A	#N/A		#N/A	#N/A	#N/A	#N/A		Q2/1967	#N/A	#N/A	#N/A	#N/A
Q3/1967	1967-09-30	#N/A	#N/A	#N/A	#N/A	#N/A	#N/A	#N/A	#N/A	#N/A	#N/A		#N/A	#N/A	#N/A	#N/A	#N/A	#N/A		#N/A	#N/A	#N/A	#N/A		Q3/1967	#N/A	#N/A	#N/A	#N/A
Q4/1967	1967-12-31	#N/A	#N/A	#N/A	#N/A	#N/A	#N/A	#N/A	#N/A	#N/A	#N/A		#N/A	#N/A	#N/A	#N/A	#N/A	#N/A		#N/A	#N/A	#N/A	#N/A		Q4/1967	#N/A	#N/A	#N/A	#N/A
Q1/1968	1968-03-31	#N/A	#N/A	#N/A	#N/A	#N/A	#N/A	#N/A	#N/A	#N/A	#N/A		#N/A	#N/A	#N/A	#N/A	#N/A	#N/A		#N/A	#N/A	#N/A	#N/A		Q1/1968	#N/A	#N/A	#N/A	#N/A
Q2/1968	1968-06-30	#N/A	#N/A	#N/A	#N/A	#N/A	#N/A	#N/A	#N/A	#N/A	#N/A		#N/A	#N/A	#N/A	#N/A	#N/A	#N/A		#N/A	#N/A	#N/A	#N/A		Q2/1968	#N/A	#N/A	#N/A	#N/A
Q3/1968	1968-09-30	#N/A	#N/A	#N/A	#N/A	#N/A	#N/A	#N/A	#N/A	#N/A	#N/A		#N/A	#N/A	#N/A	#N/A	#N/A	#N/A		#N/A	#N/A	#N/A	#N/A		Q3/1968	#N/A	#N/A	#N/A	#N/A
Q4/1968	1968-12-31	#N/A	#N/A	#N/A	#N/A	#N/A	#N/A	#N/A	#N/A	#N/A	#N/A		#N/A	#N/A	#N/A	#N/A	#N/A	#N/A		#N/A	#N/A	#N/A	#N/A		Q4/1968	#N/A	#N/A	#N/A	#N/A
Q1/1969	1969-03-31	#N/A	#N/A	#N/A	#N/A	#N/A	#N/A	#N/A	#N/A	#N/A	#N/A		#N/A	#N/A	#N/A	#N/A	#N/A	#N/A		#N/A	#N/A	#N/A	#N/A		Q1/1969	#N/A	#N/A	#N/A	#N/A
Q2/1969	1969-06-30	#N/A	#N/A	#N/A	#N/A	#N/A	#N/A	#N/A	#N/A	#N/A	#N/A		#N/A	#N/A	#N/A	#N/A	#N/A	#N/A		#N/A	#N/A	#N/A	#N/A		Q2/1969	#N/A	#N/A	#N/A	#N/A
Q3/1969	1969-09-30	#N/A	#N/A	#N/A	#N/A	#N/A	#N/A	#N/A	#N/A	#N/A	#N/A		#N/A	#N/A	#N/A	#N/A	#N/A	#N/A		#N/A	#N/A	#N/A	#N/A		Q3/1969	#N/A	#N/A	#N/A	#N/A
Q4/1969	1969-12-31	#N/A	#N/A	#N/A	#N/A	#N/A	#N/A	#N/A	#N/A	#N/A	#N/A		#N/A	#N/A	#N/A	#N/A	#N/A	#N/A		#N/A	#N/A	#N/A	#N/A		Q4/1969	#N/A	#N/A	#N/A	#N/A
Q1/1970	1970-03-31	#N/A	86.11	#N/A	#N/A	#N/A	#N/A	#N/A	#N/A	#N/A	#N/A		72.11	65.2	95.99	43.1	25.72	41.65		0.0237138	0.0289877	0.0805292	0.0219064		Q1/1970	4.64442	87.0931	27.9223	135.289
Q2/1970	1970-06-30	#N/A	88.6	#N/A	#N/A	#N/A	#N/A	#N/A	#N/A	#N/A	#N/A		73.82	67.09	103.72	44.98	25.88	42.03		0.000948253	0.008347	0.0492673	0.0164762		Q2/1970	4.75456	89.6177	30.1708	138.253
Q3/1970	1970-09-30	#N/A	89.35	#N/A	#N/A	#N/A	#N/A	#N/A	#N/A	#N/A	#N/A		73.89	67.65	108.83	45.73	26.44	42.58		-0.0029774	-0.000295639	0.00762657	0.00732026		Q3/1970	4.75907	90.3657	31.6572	140.531
Q4/1970	1970-12-31	#N/A	89.32	#N/A	#N/A	#N/A	#N/A	#N/A	#N/A	#N/A	#N/A		73.67	67.63	109.66	45.46	26.87	43.26		0.00868739	-0.0215881	-0.0383914	0.00432563		Q4/1970	4.7449	90.339	31.8987	141.56
Q1/1971	1971-03-31	#N/A	87.39	#N/A	#N/A	#N/A	#N/A	#N/A	#N/A	#N/A	#N/A		74.31	66.17	105.45	45.02	27.25	43.82		-0.002826	0.00166238	0.068753	0.0176587		Q1/1971	4.78612	88.3888	30.674	142.172
Q2/1971	1971-06-30	#N/A	87.54	#N/A	#N/A	#N/A	#N/A	#N/A	#N/A	#N/A	#N/A		74.1	66.28	112.7	45.87	27.7	44.57		0.00782726	0.00935425	0.0122449	0.0190452		Q2/1971	4.77259	88.5357	32.783	144.682
Q3/1971	1971-09-30	#N/A	88.35	#N/A	#N/A	#N/A	#N/A	#N/A	#N/A	#N/A	#N/A		74.68	66.9	114.08	46.95	28.26	45.18		0.0085699	-0.00881913	-0.00420757	-0.000996761		Q3/1971	4.80995	89.3639	33.1844	147.438
Q4/1971	1971-12-31	#N/A	87.57	#N/A	#N/A	#N/A	#N/A	#N/A	#N/A	#N/A	#N/A		75.32	66.31	113.6	46.2	28.39	45.68		-0.0203133	0.00542905	0.000176056	0.0149663		Q4/1971	4.85117	88.5758	33.0448	147.291
Q1/1972	1972-03-31	#N/A	88.07	#N/A	#N/A	#N/A	#N/A	#N/A	#N/A	#N/A	#N/A		73.79	66.67	113.62	46.19	29.34	46.54		-0.00623391	0.00779961	0.027548	0.0127796		Q1/1972	4.75263	89.0567	33.0506	149.495
Q2/1972	1972-06-30	#N/A	88.75	#N/A	#N/A	#N/A	#N/A	#N/A	#N/A	#N/A	#N/A		73.33	67.19	116.75	46.38	29.84	47.41		0.00354562	0.0244084	0.0309208	0.0233762		Q2/1972	4.723	89.7513	33.9611	151.406
Q3/1972	1972-09-30	#N/A	90.9	#N/A	#N/A	#N/A	#N/A	#N/A	#N/A	#N/A	#N/A		73.59	68.83	120.36	47.88	30.44	48.2		0.0156271	0.0196135	0.00182785	0.0171514		Q3/1972	4.73975	91.942	35.0112	154.945
Q4/1972	1972-12-31	#N/A	92.7	#N/A	#N/A	#N/A	#N/A	#N/A	#N/A	#N/A	#N/A		74.74	70.18	120.58	48.53	30.91	49.25		0.0271608	0.0222286	-0.0174158	0.0109566		Q4/1972	4.81381	93.7453	35.0752	157.603
Q1/1973	1973-03-31	#N/A	94.74	#N/A	#N/A	#N/A	#N/A	#N/A	#N/A	#N/A	#N/A		76.77	71.74	118.48	49.42	31.27	49.41		0.0098997	0.00780597	0.00506415	0.0106072		Q1/1973	4.94456	95.8291	34.4643	159.329
Q2/1973	1973-06-30	#N/A	95.49	#N/A	#N/A	#N/A	#N/A	#N/A	#N/A	#N/A	#N/A		77.53	72.3	119.08	49.45	31.62	50.41		0.00902876	0.0109267	0.0212462	0.000152114		Q2/1973	4.99351	96.5771	34.6388	161.02
Q3/1973	1973-09-30	#N/A	96.54	#N/A	#N/A	#N/A	#N/A	#N/A	#N/A	#N/A	#N/A		78.23	73.09	121.61	48.83	31.83	50.84		-0.00294005	0.00205226	-0.0531206	0.00920152		Q3/1973	5.0386	97.6324	35.3748	161.044
Q4/1973	1973-12-31	#N/A	96.73	#N/A	#N/A	#N/A	#N/A	#N/A	#N/A	#N/A	#N/A		78	73.24	115.15	49.43	32.02	51.26		0.0312821	0.00942108	0.00199739	0.0140155		Q4/1973	5.02378	97.8328	33.4956	162.526
Q1/1974	1974-03-31	#N/A	97.64	#N/A	#N/A	#N/A	#N/A	#N/A	#N/A	#N/A	#N/A		80.44	73.93	115.38	49.81	32.19	52.57		0.00845351	0.00960368	-0.0702895	0.00401278		Q1/1974	5.18094	98.7544	33.5626	164.804
Q2/1974	1974-06-30	#N/A	98.58	#N/A	#N/A	#N/A	#N/A	#N/A	#N/A	#N/A	#N/A		81.12	74.64	107.27	49.72	32.54	52.85		0.000246548	-0.011388	-0.0325347	0.0123603		Q2/1974	5.22473	99.7029	31.2035	165.465
Q3/1974	1974-09-30	#N/A	97.46	#N/A	#N/A	#N/A	#N/A	#N/A	#N/A	#N/A	#N/A		81.14	73.79	103.78	49.77	32.95	54.06		-0.00135568	-0.0327958	0.0310272	-0.00299751		Q3/1974	5.22602	98.5674	30.1883	167.51
Q4/1974	1974-12-31	#N/A	94.27	#N/A	#N/A	#N/A	#N/A	#N/A	#N/A	#N/A	#N/A		81.03	71.37	107	49.04	33.2	54.13		-0.0167839	-0.0255009	0.00336449	0.00381316		Q4/1974	5.21894	95.3348	31.1249	167.008
Q1/1975	1975-03-31	#N/A	91.86	#N/A	#N/A	#N/A	#N/A	#N/A	#N/A	#N/A	#N/A		79.67	69.55	107.36	48.52	33.3	55.07		-0.0035145	-0.012509	-0.1019	0.000219154		Q1/1975	5.13134	92.9037	31.2296	167.645
Q2/1975	1975-06-30	#N/A	90.71	#N/A	#N/A	#N/A	#N/A	#N/A	#N/A	#N/A	#N/A		79.39	68.68	96.42	48.17	33.4	55.35		0.00251921	0.00975539	0.0276914	0.0112474		Q2/1975	5.11331	91.7416	28.0473	167.682
Q3/1975	1975-09-30	#N/A	91.59	#N/A	#N/A	#N/A	#N/A	#N/A	#N/A	#N/A	#N/A		79.59	69.35	99.09	48.42	34	56.04		0.00301545	0.030858	0.0325966	0.0122779		Q3/1975	5.12619	92.6366	28.824	169.568
Q4/1975	1975-12-31	#N/A	94.43	#N/A	#N/A	#N/A	#N/A	#N/A	#N/A	#N/A	#N/A		79.83	71.49	102.32	49.16	34.41	56.59		-0.029187	0.00559519	0.00215012	0.0116296		Q4/1975	5.14165	95.4951	29.7636	171.65
Q1/1976	1976-03-31	#N/A	94.94	#N/A	#N/A	#N/A	#N/A	#N/A	#N/A	#N/A	#N/A		77.5	71.89	102.54	50.05	34.65	57.09		0.00503226	0.0257338	-0.000292569	0.0112843		Q1/1976	4.99158	96.0294	29.8276	173.646
Q2/1976	1976-06-30	#N/A	97.4	#N/A	#N/A	#N/A	#N/A	#N/A	#N/A	#N/A	#N/A		77.89	73.74	102.51	50.63	35.03	57.73		-0.00102709	-0.00244101	0.0159984	0.00606737		Q2/1976	5.0167	98.5006	29.8188	175.605
Q3/1976	1976-09-30	#N/A	97.15	#N/A	#N/A	#N/A	#N/A	#N/A	#N/A	#N/A	#N/A		77.81	73.56	104.15	51.22	34.89	58.15		0.00346999	0.0243339	0.0151704	0.0125468		Q3/1976	5.01155	98.2602	30.2959	176.671
Q4/1976	1976-12-31	#N/A	99.52	#N/A	#N/A	#N/A	#N/A	#N/A	#N/A	#N/A	#N/A		78.08	75.35	105.73	52.18	35.63	58.26		0.0380379	0.00557399	0.0430341	0.00842062		Q4/1976	5.02894	100.651	30.7555	178.887
Q1/1977	1977-03-31	#N/A	100.08	#N/A	#N/A	#N/A	#N/A	#N/A	#N/A	#N/A	#N/A		81.05	75.77	110.28	52.43	36.3	58.57		0.00394818	0.000263957	-0.0552231	0.0109301		Q1/1977	5.22023	101.212	32.079	180.394
Q2/1977	1977-06-30	#N/A	100.09	#N/A	#N/A	#N/A	#N/A	#N/A	#N/A	#N/A	#N/A		81.37	75.79	104.19	53.12	36.74	59.05		0.00614477	-0.00554163	-0.0121893	0.00597676		Q2/1977	5.24084	101.239	30.3075	182.365
Q3/1977	1977-09-30	#N/A	99.55	#N/A	#N/A	#N/A	#N/A	#N/A	#N/A	#N/A	#N/A		81.87	75.37	102.92	53.38	36.94	59.48		0.0024429	0.0200345	0.0237077	0.0114152		Q3/1977	5.27304	100.678	29.9381	183.455
Q4/1977	1977-12-31	#N/A	101.54	#N/A	#N/A	#N/A	#N/A	#N/A	#N/A	#N/A	#N/A		82.07	76.88	105.36	54.26	37.42	59.83		0.0137687	-0.00962539	0.0166097	0.0120784		Q4/1977	5.28592	102.695	30.6479	185.55
Q1/1978	1978-03-31	#N/A	100.57	#N/A	#N/A	#N/A	#N/A	#N/A	#N/A	#N/A	#N/A		83.2	76.14	107.11	54.88	38.31	60.15		0.00649038	-0.0111636	-0.0154981	0.0135646		Q1/1978	5.3587	101.707	31.1569	187.791
Q2/1978	1978-06-30	#N/A	99.43	#N/A	#N/A	#N/A	#N/A	#N/A	#N/A	#N/A	#N/A		83.74	75.29	105.45	55.96	38.68	60.78		0.00429902	0.0284234	0.00474158	0.0110024		Q2/1978	5.39348	100.571	30.674	190.338
Q3/1978	1978-09-30	#N/A	102.27	#N/A	#N/A	#N/A	#N/A	#N/A	#N/A	#N/A	#N/A		84.1	77.43	105.95	56.72	39.12	61.29		0.0020214	0.00452021	0.0316187	0.0136829		Q3/1978	5.41667	103.43	30.8195	192.432
Q4/1978	1978-12-31	#N/A	102.74	#N/A	#N/A	#N/A	#N/A	#N/A	#N/A	#N/A	#N/A		84.27	77.78	109.3	57.52	39.9	61.86		-0.0370239	0.0110568	-0.0574565	0.00119287		Q4/1978	5.42762	103.897	31.794	195.065
Q1/1979	1979-03-31	#N/A	103.86	#N/A	#N/A	#N/A	#N/A	#N/A	#N/A	#N/A	#N/A		81.15	78.64	103.02	56.91	40.54	62.02		0.0017252	0.0239064	0.118327	0.0224494		Q1/1979	5.22667	105.046	29.9672	195.298
Q2/1979	1979-06-30	#N/A	106.35	#N/A	#N/A	#N/A	#N/A	#N/A	#N/A	#N/A	#N/A		81.29	80.52	115.21	59.37	41.11	62.57		0.00381351	0.00732737	-0.0305529	0.00613309		Q2/1979	5.23568	107.557	33.5131	199.682
Q3/1979	1979-09-30	#N/A	107.13	#N/A	#N/A	#N/A	#N/A	#N/A	#N/A	#N/A	#N/A		81.6	81.11	111.69	59.11	41.79	63.15		0.00698529	0.00554802	0.00555108	0.00883877		Q3/1979	5.25565	108.345	32.4892	200.907
Q4/1979	1979-12-31	#N/A	107.71	#N/A	#N/A	#N/A	#N/A	#N/A	#N/A	#N/A	#N/A		82.17	81.56	112.31	59.48	42.25	63.77		0.00486796	0.00441393	0.0578755	-0.000181269		Q4/1979	5.29236	108.946	32.6695	202.683
Q1/1980	1980-03-31	#N/A	108.2	#N/A	#N/A	#N/A	#N/A	#N/A	#N/A	#N/A	#N/A		82.57	81.92	118.81	59.01	42.57	63.89		0.00302773	-0.0175781	-0.0424207	0.006406		Q1/1980	5.31812	109.427	34.5603	202.646
Q2/1980	1980-06-30	#N/A	106.29	#N/A	#N/A	#N/A	#N/A	#N/A	#N/A	#N/A	#N/A		82.82	80.48	113.77	59.06	43.26	64.21		-0.00120744	-0.0108101	-0.0413993	0.00618507		Q2/1980	5.33423	107.504	33.0942	203.944
Q3/1980	1980-09-30	#N/A	105.14	#N/A	#N/A	#N/A	#N/A	#N/A	#N/A	#N/A	#N/A		82.72	79.61	109.06	58.97	43.65	64.94		0.00157157	-0.0160784	-0.0377774	0.00286465		Q3/1980	5.32779	106.342	31.7241	205.206
Q4/1980	1980-12-31	#N/A	103.45	#N/A	#N/A	#N/A	#N/A	#N/A	#N/A	#N/A	#N/A		82.85	78.33	104.94	58.72	43.88	65.44		-0.0067592	0.00868122	0.0546979	0.0150559		Q4/1980	5.33616	104.632	30.5257	205.793
Q1/1981	1981-03-31	#N/A	104.35	#N/A	#N/A	#N/A	#N/A	#N/A	#N/A	#N/A	#N/A		82.29	79.01	110.68	59.3	44.14	67.13		-0.00413173	-0.00784711	0.0166245	0.00269684		Q1/1981	5.30009	105.54	32.1954	208.892
Q2/1981	1981-06-30	#N/A	103.54	#N/A	#N/A	#N/A	#N/A	#N/A	#N/A	#N/A	#N/A		81.95	78.39	112.52	59.01	44.5	67.52		0.00463697	0.00471999	-0.0517241	0.00596387		Q2/1981	5.27819	104.712	32.7306	209.455
Q3/1981	1981-09-30	#N/A	104.04	#N/A	#N/A	#N/A	#N/A	#N/A	#N/A	#N/A	#N/A		82.33	78.76	106.7	59.44	44.82	67.79		0.0224705	0.00469782	-0.0491097	0.00430108		Q3/1981	5.30267	105.206	31.0377	210.704
Q4/1981	1981-12-31	#N/A	104.51	#N/A	#N/A	#N/A	#N/A	#N/A	#N/A	#N/A	#N/A		84.18	79.13	101.46	59.49	45.05	68.25		0.098717	-0.00328573	0.0209935	-0.00873893		Q4/1981	5.42182	105.701	29.5134	211.611
Q1/1982	1982-03-31	#N/A	104.17	#N/A	#N/A	#N/A	#N/A	#N/A	#N/A	#N/A	#N/A		92.49	78.87	103.59	58.28	45.31	67.69		0.024327	-0.0124255	-0.00579206	-0.00134283		Q1/1982	5.95705	105.353	30.133	209.761
Q2/1982	1982-06-30	#N/A	102.87	#N/A	#N/A	#N/A	#N/A	#N/A	#N/A	#N/A	#N/A		94.74	77.89	102.99	57.25	45.61	68.19		0.00432763	-0.0306843	-0.0230119	-0.000175387		Q2/1982	6.10196	104.044	29.9585	209.48
Q3/1982	1982-09-30	#N/A	99.72	#N/A	#N/A	#N/A	#N/A	#N/A	#N/A	#N/A	#N/A		95.15	75.5	100.62	56.59	45.99	68.44		-0.00725171	-0.0101987	0.0115285	0.0074845		Q3/1982	6.12837	100.852	29.2691	209.443
Q4/1982	1982-12-31	#N/A	98.7	#N/A	#N/A	#N/A	#N/A	#N/A	#N/A	#N/A	#N/A		94.46	74.73	101.78	57.25	46.2	68.85		-0.0610841	0.0163254	0.00609157	0.00504933		Q4/1982	6.08393	99.8231	29.6065	211.011
Q1/1983	1983-03-31	#N/A	100.32	#N/A	#N/A	#N/A	#N/A	#N/A	#N/A	#N/A	#N/A		88.69	75.95	102.4	57.49	46.71	68.97		-0.0103732	0.0160632	0.00732422	0.00895074		Q1/1983	5.7123	101.453	29.7868	212.076
Q2/1983	1983-06-30	#N/A	101.93	#N/A	#N/A	#N/A	#N/A	#N/A	#N/A	#N/A	#N/A		87.77	77.17	103.15	58.62	46.94	69.16		0.00581064	-0.000777504	0.019777	-0.0034913		Q2/1983	5.65304	103.082	30.005	213.974
Q3/1983	1983-09-30	#N/A	101.84	#N/A	#N/A	#N/A	#N/A	#N/A	#N/A	#N/A	#N/A		88.28	77.11	105.19	57.61	47.15	69.35		0.0056638	0.0260667	0.00722502	0.0123485		Q3/1983	5.68589	103.002	30.5984	213.227
Q4/1983	1983-12-31	#N/A	104.5	#N/A	#N/A	#N/A	#N/A	#N/A	#N/A	#N/A	#N/A		88.78	79.12	105.95	58.87	47.72	69.67		0.0408876	0.012639	-0.0121756	0.0124248		Q4/1983	5.7181	105.687	30.8195	215.86
Q1/1984	1984-03-31	#N/A	105.81	#N/A	#N/A	#N/A	#N/A	#N/A	#N/A	#N/A	#N/A		92.41	80.12	104.66	59.92	48.05	70.48		0.00746672	-0.0451822	-0.0152876	0.00168114		Q1/1984	5.95189	107.023	30.4442	218.542
Q2/1984	1984-06-30	#N/A	101.05	#N/A	#N/A	#N/A	#N/A	#N/A	#N/A	#N/A	#N/A		93.1	76.5	103.06	59.68	48.29	70.78		0.00526316	0.0630065	0.00611294	0.0101259		Q2/1984	5.99634	102.187	29.9788	218.91
Q3/1984	1984-09-30	#N/A	107.41	#N/A	#N/A	#N/A	#N/A	#N/A	#N/A	#N/A	#N/A		93.59	81.32	103.69	60.57	48.84	71.15		-0.000854792	0.00860797	0.0284502	0.00642446		Q3/1984	6.0279	108.626	30.1621	221.126
Q4/1984	1984-12-31	#N/A	108.32	#N/A	#N/A	#N/A	#N/A	#N/A	#N/A	#N/A	#N/A		93.51	82.02	106.64	60.84	49.49	71.39		-0.0661961	0.00731529	-0.12425	0.00412723		Q4/1984	6.02274	109.561	31.0202	222.547
Q1/1985	1985-03-31	#N/A	109.13	#N/A	#N/A	#N/A	#N/A	#N/A	#N/A	#N/A	#N/A		87.32	82.62	93.39	61.11	49.62	71.74		0	0.00641491	0.0905879	0.00767249		Q1/1985	5.62406	110.362	27.1659	223.465
Q2/1985	1985-06-30	#N/A	109.82	#N/A	#N/A	#N/A	#N/A	#N/A	#N/A	#N/A	#N/A		87.32	83.15	101.85	61.48	50.19	72.2		-0.00183234	0.0171978	0.0173785	0.0127264		Q2/1985	5.62406	111.07	29.6269	225.18
Q3/1985	1985-09-30	#N/A	111.71	#N/A	#N/A	#N/A	#N/A	#N/A	#N/A	#N/A	#N/A		87.16	84.58	103.62	62.57	50.92	72.72		0.0127352	0.00295578	-0.015634	0.00429622		Q3/1985	5.61376	112.981	30.1417	228.046
Q4/1985	1985-12-31	#N/A	112.04	#N/A	#N/A	#N/A	#N/A	#N/A	#N/A	#N/A	#N/A		88.27	84.83	102	62.37	51.7	72.94		0.0817945	-0.0159142	-0.07	0.00331533		Q4/1985	5.68525	113.314	29.6705	229.025
Q1/1986	1986-03-31	#N/A	110.25	#N/A	#N/A	#N/A	#N/A	#N/A	#N/A	#N/A	#N/A		95.49	83.48	94.86	62.09	52.3	73.24		0.00869201	0.00239578	0.0540797	0.0131642		Q1/1986	6.15027	111.511	27.5935	229.785
Q2/1986	1986-06-30	#N/A	110.52	#N/A	#N/A	#N/A	#N/A	#N/A	#N/A	#N/A	#N/A		96.32	83.68	99.99	63.46	52.97	73.67		0.00384136	0.00979924	0.0312031	0.0053656		Q2/1986	6.20373	111.778	29.0858	232.81
Q3/1986	1986-09-30	#N/A	111.61	#N/A	#N/A	#N/A	#N/A	#N/A	#N/A	#N/A	#N/A		96.69	84.5	103.11	63.15	53.7	74.27		-0.0115834	-0.0060355	0.0321986	0.010517		Q3/1986	6.22756	112.874	29.9934	234.059
Q4/1986	1986-12-31	#N/A	110.92	#N/A	#N/A	#N/A	#N/A	#N/A	#N/A	#N/A	#N/A		95.57	83.99	106.43	63.72	54.61	74.8		-0.0644554	-0.0271461	-0.189232	-0.00688655		Q4/1986	6.15542	112.192	30.9591	236.52
Q1/1987	1987-03-31	#N/A	107.92	#N/A	#N/A	#N/A	#N/A	#N/A	#N/A	#N/A	#N/A		89.41	81.71	86.29	62.64	54.64	74.52		-0.00838832	0.0241097	0.169776	0.0162669		Q1/1987	5.75867	109.147	25.1006	234.892
Q2/1987	1987-06-30	#N/A	110.52	#N/A	#N/A	#N/A	#N/A	#N/A	#N/A	#N/A	#N/A		88.66	83.68	100.94	64.4	55.48	75.04		-0.00101511	-0.00513862	0.0118883	0.00728504		Q2/1987	5.71037	111.778	29.3621	238.713
Q3/1987	1987-09-30	#N/A	109.95	#N/A	#N/A	#N/A	#N/A	#N/A	#N/A	#N/A	#N/A		88.57	83.25	102.14	64.88	56.04	75.42		0.00632268	0.0164565	0.0104758	0.0110523		Q3/1987	5.70457	111.204	29.7112	240.452
Q4/1987	1987-12-31	#N/A	111.76	#N/A	#N/A	#N/A	#N/A	#N/A	#N/A	#N/A	#N/A		89.13	84.62	103.21	65.76	56.89	75.86		0.0540783	-0.0167809	-0.0520298	0.00166238		Q4/1987	5.74064	113.034	30.0225	243.109
Q1/1988	1988-03-31	#N/A	109.89	#N/A	#N/A	#N/A	#N/A	#N/A	#N/A	#N/A	#N/A		93.95	83.2	97.84	65.55	56.9	76.39		0.00340607	0.0269231	0.0330131	0.0157413		Q1/1988	6.05108	111.137	28.4604	243.513
Q2/1988	1988-06-30	#N/A	112.85	#N/A	#N/A	#N/A	#N/A	#N/A	#N/A	#N/A	#N/A		94.27	85.44	101.07	66.89	58.1	76.98		0.00540999	0.0138109	-0.00336401	0.0115859		Q2/1988	6.07169	114.129	29.4	247.346
Q3/1988	1988-09-30	#N/A	114.4	#N/A	#N/A	#N/A	#N/A	#N/A	#N/A	#N/A	#N/A		94.78	86.62	100.73	68.03	58.97	77.31		-0.000633045	0.0130455	0.00526159	0.0108169		Q3/1988	6.10454	115.706	29.3011	250.212
Q4/1988	1988-12-31	#N/A	115.9	#N/A	#N/A	#N/A	#N/A	#N/A	#N/A	#N/A	#N/A		94.72	87.75	101.26	69.16	59.71	77.65		0.020587	0.01151	0.0873988	0.00484215		Q4/1988	6.10068	117.215	29.4552	252.919
Q1/1989	1989-03-31	#N/A	117.24	#N/A	#N/A	#N/A	#N/A	#N/A	#N/A	#N/A	#N/A		96.67	88.76	110.11	69.09	60.43	78		-0.0048619	0.010703	-0.0698393	0.00799923		Q1/1989	6.22627	118.564	32.0296	254.143
Q2/1989	1989-06-30	#N/A	118.5	#N/A	#N/A	#N/A	#N/A	#N/A	#N/A	#N/A	#N/A		96.2	89.71	102.42	69.82	61.02	78.34		0.00862786	0.0133764	0.00302675	0.008366		Q2/1989	6.196	119.833	29.7927	256.176
Q3/1989	1989-09-30	#N/A	120.07	#N/A	#N/A	#N/A	#N/A	#N/A	#N/A	#N/A	#N/A		97.03	90.91	102.73	70.55	62.13	78.25		0.0285479	0.00769992	0.014504	0.0106196		Q3/1989	6.24946	121.436	29.8828	258.319
Q4/1989	1989-12-31	#N/A	120.99	#N/A	#N/A	#N/A	#N/A	#N/A	#N/A	#N/A	#N/A		99.8	91.61	104.22	71.6	63.06	78.51		-0.0221443	0.0140814	0.0958549	0.0178731		Q4/1989	6.42787	122.371	30.3163	261.063
Q1/1990	1990-03-31	#N/A	122.7	#N/A	#N/A	#N/A	#N/A	#N/A	#N/A	#N/A	#N/A		97.59	92.9	114.21	73.26	64.68	79.04		0.0293063	-0.00118407	-0.0544611	0.0135035		Q1/1990	6.28553	124.094	33.2222	265.729
Q2/1990	1990-06-30	#N/A	122.56	#N/A	#N/A	#N/A	#N/A	#N/A	#N/A	#N/A	#N/A		100.45	92.79	107.99	73.94	66.28	79.69		-0.000895968	0.0227395	-0.00888971	0.0216452		Q2/1990	6.46973	123.947	31.4129	269.317
Q3/1990	1990-09-30	#N/A	125.34	#N/A	#N/A	#N/A	#N/A	#N/A	#N/A	#N/A	#N/A		100.36	94.9	107.03	77.01	67.46	80.2		-0.031387	0.0155954	0.00401757	0.0172698		Q3/1990	6.46393	126.766	31.1336	275.146
Q4/1990	1990-12-31	#N/A	127.3	#N/A	#N/A	#N/A	#N/A	#N/A	#N/A	#N/A	#N/A		97.21	96.38	107.46	78.69	68.83	81.03		0.00781813	0.0447188	-0.000279174	0.0350908		Q4/1990	6.26105	128.743	31.2587	279.898
Q1/1991	1991-03-31	6.31	134.5	31.25	72.3	9.45	33.1	36.12	41.77	76.33	20.65		97.97	100.69	107.43	83.89	71.25	81.43		-0.00724712	-0.0298937	-0.00539886	-0.00114131		Q1/1991	6.31	134.5	31.25	289.72
Q2/1991	1991-06-30	6.28	131.18	31.44	71.92	9.26	32.83	33.97	42.35	76.92	20.8		97.26	97.68	106.85	83.06	71.51	81.73		-0.00462677	-0.0226249	0.022087	-0.000761744		Q2/1991	6.28	131.18	31.44	288.05
Q3/1991	1991-09-30	6.23	128.95	31.88	70.4	8.94	32.88	36.24	42.45	78.35	20.87		96.81	95.47	109.21	81.2	71.99	82.93		-0.00402851	0.0212632	0.0141013	0.0094867		Q3/1991	6.23	128.95	31.88	290.13
Q4/1991	1991-12-31	6.23	130.88	32.59	71.11	9.5	33.6	36.38	42.29	80.03	20.76		96.42	97.5	110.75	81.67	72.49	84.2		-0.0220909	0.0125128	0.0403612	0.0247105		Q4/1991	6.23	130.88	32.59	293.67
Q1/1992	1992-03-31	6.14	131.72	33.5	72.33	9.78	33.68	36.63	44.01	80.83	22.16		94.29	98.72	115.22	84.79	73.76	85.7		0.00349984	-0.0277553	0.00208297	0.0014739		Q1/1992	6.14	131.72	33.5	299.42
Q2/1992	1992-06-30	6.1	127.91	33.65	70.98	9.93	33.56	37.11	44.43	81.19	21.84		94.62	95.98	115.46	84.15	74.41	86.05		-0.00718664	-0.0266722	-0.00441711	0.00793099		Q2/1992	6.1	127.91	33.65	299.04
Q3/1992	1992-09-30	6.08	125.01	33.45	71.06	10.02	34.25	37.87	44.68	81.85	21.99		93.94	93.42	114.95	84.06	75.55	86.94		-0.00745156	-0.0230143	0.0184428	0.00300142		Q3/1992	6.08	125.01	33.45	301.72
Q4/1992	1992-12-31	6.06	122.74	34.5	71.52	10.03	34.03	38.25	44.52	81.65	21.95		93.24	91.27	117.07	84.17	75.85	87.27		0.0032175	-0.0242139	-0.0365593	0.00048526		Q4/1992	6.06	122.74	34.5	301.95
Q1/1993	1993-03-31	5.47	119.66	33.43	70.18	10.62	35.03	38.37	45.8	81.99	21.46		93.54	89.06	112.79	83.24	76.87	87.3		-0.0116528	-0.0183023	0.00283713	0.00816459		Q1/1993	5.47	119.66	33.43	303.45
Q2/1993	1993-06-30	5.44	117.12	33.58	69.65	10.74	35.83	39.08	46.33	82.32	21.4		92.45	87.43	113.11	83.29	78.08	88.06		-0.00378583	-0.00354569	0.0133498	0.00400914		Q2/1993	5.44	117.12	33.58	305.35
Q3/1993	1993-09-30	5.48	117.21	34.22	69.97	10.81	36.03	39.74	46.42	82.21	21.47		92.1	87.12	114.62	83.83	78.89	87.71		-0.00217155	0.0114784	-0.00872448	0.0012778		Q3/1993	5.48	117.21	34.22	306.65
Q4/1993	1993-12-31	5.47	118.5	33.44	69.48	10.87	36.14	40.2	46.46	81.77	21.55		91.9	88.12	113.62	83.32	79.54	87.89		-0.0763874	0.00590104	0.0396057	0.00582253		Q4/1993	5.47	118.5	33.44	306.47
Q1/1994	1994-03-31	3.95	119.17	34.72	70.53	10.5	35.97	40.85	45.57	83.33	22.06		84.88	88.64	118.12	84.41	79.16	88.64		-0.0177898	0.0135379	0.012445	0.00574918		Q1/1994	3.95	119.17	34.72	308.81
Q2/1994	1994-06-30	3.96	119.96	35.51	70.4	10.6	35.91	41.42	45.8	84.02	22		83.37	89.84	119.59	84.32	80.17	89.17		-0.0107953	0.00322796	0.000501714	0.00981629		Q2/1994	3.96	119.96	35.51	310.15
Q3/1994	1994-09-30	3.96	120.39	35.55	71.24	10.83	35.89	42.13	46.57	84.55	22.25		82.47	90.13	119.65	85.35	80.84	89.96		0.0232812	0.0280706	0.0402842	0.00632442		Q3/1994	3.96	120.39	35.55	313.46
Q4/1994	1994-12-31	3.98	124.74	36.55	72.78	11.01	35.26	42.66	46.87	84.62	22.38		84.39	92.66	124.47	86.94	80.81	90.02		0.0561678	-0.0259011	-0.062023	0.00919424		Q4/1994	3.98	124.74	36.55	315.58
Q1/1995	1995-03-31	4	121.35	34.52	71.69	11.05	34.44	44.81	47.71	84.79	22.34		89.13	90.26	116.75	86.02	83.75	90.37		-0.0112196	0.00764458	0.0183298	0.0111863		Q1/1995	4	121.35	34.52	316.83
Q2/1995	1995-06-30	4.05	121.84	35.42	72.43	11.28	34.47	45.39	47.95	85.5	22.23		88.13	90.95	118.89	87.25	84.9	90.9		-0.00862362	-0.0115448	-0.0201867	0.00718495		Q2/1995	4.05	121.84	35.42	319.25
Q3/1995	1995-09-30	4.08	121.23	34.61	73.1	11.47	34.71	46.19	48.6	86.05	22.34		87.37	89.9	116.49	87.58	85.74	91.62		0.00457823	-0.00244716	-0.0247232	0.00868121		Q3/1995	4.08	121.23	34.61	322.46
Q4/1995	1995-12-31	4.07	120.87	33.73	72.92	11.74	34.79	47.15	49.23	87.1	22.45		87.77	89.68	113.61	87.65	86.9	92.69		0.0494474	-0.0180642	-0.117243	-0.00168388		Q4/1995	4.07	120.87	33.73	325.38
Q1/1996	1996-03-31	4.19	117.15	30.56	71.06	11.59	34.89	48.67	48.58	87.18	22.61		92.11	88.06	100.29	85.9	87.98	92.91		-0.0085767	0.0123779	0.128328	0.0148431		Q1/1996	4.19	117.15	30.56	324.58
Q2/1996	1996-06-30	4.19	118.38	33.95	72.64	11.86	34.8	49.56	49.21	87.99	22.67		91.32	89.15	113.16	87.82	88.94	93.99		0.00470872	-0.00213124	-0.0240368	0.00491228		Q2/1996	4.19	118.38	33.95	328.73
Q3/1996	1996-09-30	4.2	118.8	33.43	72.74	12.21	34.74	50.19	49.7	88.15	22.72		91.75	88.96	110.44	87.85	90.08	94.15		-0.00305177	0.0140513	-0.00950742	0.0106586		Q3/1996	4.2	118.8	33.43	330.45
Q4/1996	1996-12-31	4.24	120.54	33.28	73.61	12.6	35.28	51.18	50.04	88.52	22.75		91.47	90.21	109.39	88.58	92.01	94.39		0.0362961	0.0069837	-0.0613402	-0.00825515		Q4/1996	4.24	120.54	33.28	333.98
Q1/1997	1997-03-31	4.32	120.39	31.28	73.24	12.82	35.32	49.94	48.17	89.14	22.41		94.79	90.84	102.68	88.79	89.9	94.02		0.00400886	0.011779	0.0397351	0.00920392		Q1/1997	4.32	120.39	31.28	331.04
Q2/1997	1997-06-30	4.18	121.68	32.74	73.51	13.11	35.26	51.28	49.94	89.51	22.71		95.17	91.91	106.76	89.88	91.01	94.33		-0.00903646	0.0052225	-0.0109592	0.00523218		Q2/1997	4.18	121.68	32.74	335.32
Q3/1997	1997-09-30	4.2	122.75	32.28	73.92	13.28	35.37	51.91	50.2	89.95	22.55		94.31	92.39	105.59	90.07	91.85	94.74		0.0038172	0.0260851	-0.000757648	0.00712065		Q3/1997	4.2	122.75	32.28	337.18
Q4/1997	1997-12-31	4.24	125.74	32.21	74.41	13.4	35.6	53.06	51.1	90.09	22.52		94.67	94.8	105.51	90.33	93.36	94.94		-0.0543995	-0.00675105	0.00540233	0.0142124		Q4/1997	4.24	125.74	32.21	340.18
Q1/1998	1998-03-31	4.11	124.08	31.94	76.44	14.72	35.49	52.35	50.7	90.18	22.54		89.52	94.16	106.08	93.45	93.32	95.82		0	-0.00785896	-0.0288462	-0.0024417		Q1/1998	4.11	124.08	31.94	342.42
Q2/1998	1998-06-30	4.11	123.71	31.19	75.03	14.93	35.27	53.06	51.37	90.26	22.57		89.52	93.42	103.02	92.29	93.74	95.87		-0.0101653	-0.00192678	-0.0196078	0.00830082		Q2/1998	4.11	123.71	31.19	342.49
Q3/1998	1998-09-30	4.14	123.41	30.8	75.55	15.17	35.82	53.43	52.06	90.59	22.85		88.61	93.24	101	92.98	94.67	96.59		-0.000451416	-0.0149078	-0.0187129	0.00397551		Q3/1998	4.14	123.41	30.8	345.47
Q4/1998	1998-12-31	4.21	121.87	30.01	75.53	15.53	37	54.18	52.77	90.75	23.07		88.57	91.85	99.11	92.16	96.25	96.96		0.134809	0.00664126	0.0351125	0.00459053		Q4/1998	4.21	121.87	30.01	348.83
Q1/1999	1999-03-31	4.55	122.05	30.26	75.51	15.64	38.32	51.96	53	91.51	22.99		100.51	92.46	102.59	94.58	94.59	97.51		0.00696448	0.00173048	-0.0126718	0.0017441		Q1/1999	4.55	122.05	30.26	348.93
Q2/1999	1999-06-30	4.52	122.53	30.42	75.17	15.98	39.39	52.6	53.64	91.43	23.05		101.21	92.62	101.29	93.95	95.66	97.57		-0.00968284	0.0143597	0.0223122	0.0133366		Q2/1999	4.52	122.53	30.42	351.26
Q3/1999	1999-09-30	4.49	124.31	30.95	76.29	16.45	39.57	53	54.04	91.66	23.22		100.23	93.95	103.55	95.81	97.09	98.11		-0.0050883	0.0174561	0.00608402	0.00841895		Q3/1999	4.49	124.31	30.95	354.23
Q4/1999	1999-12-31	4.41	126.59	30.98	77.39	16.94	38.1	53.87	55.4	91.95	23.62		99.72	95.59	104.18	96.75	98.11	98.6		0.00852387	0.021655	0.00854291	0.0124037		Q4/1999	4.41	126.59	30.98	357.27
Q1/2000	2000-03-31	4.38	129.15	30.93	78.09	16.74	37.04	54.94	56.61	92.69	24.06		100.57	97.66	105.07	98.07	99.61	99.42		-0.00467336	0.0194553	-0.0515847	0.0128576		Q1/2000	4.38	129.15	30.93	360.17
Q2/2000	2000-06-30	4.34	132.24	30.42	79.35	17.36	35.39	55.15	56.82	93.34	23.94		100.1	99.56	99.65	100.65	99.98	100.29		-0.0013986	0.0157694	-0.00561967	0.000132926		Q2/2000	4.34	132.24	30.42	361.35
Q3/2000	2000-09-30	4.32	133.66	29.96	79.36	17.92	35.01	55.12	57.13	93.26	23.95		99.96	101.13	99.09	100.52	100.28	100.16		-0.00580232	0.0051419	-0.0127157	0.00106326		Q3/2000	4.32	133.66	29.96	361.75
Q4/2000	2000-12-31	4.18	133.93	29.58	79.32	18.19	35.96	55.05	57.15	93.48	23.89		99.38	101.65	97.83	100.76	100.28	100.24		0.0458845	0.0166257	-0.00797301	0.00949283		Q4/2000	4.18	133.93	29.58	363.04
Q1/2001	2001-03-31	4.13	135.24	28.89	82.47	19.12	37.64	56.54	58.39	93.21	23.68		103.94	103.34	97.05	102.24	102.2	99.7		0.00153935	-0.0173215	-0.0296754	0.00476754		Q1/2001	4.13	135.24	28.89	371.05
Q2/2001	2001-06-30	4.11	133.79	28.37	82.55	19.33	38.99	56.56	58.13	93.46	23.51		104.1	101.55	94.17	102.91	102.52	100.16		-0.00317003	-0.00600689	0.00169905	0.00431951		Q2/2001	4.11	133.79	28.37	372.53
Q3/2001	2001-09-30	4.14	133.15	28.15	82.63	19.42	38.94	57.23	58.31	93.64	23.57		103.77	100.94	94.33	103.13	103.26	100.52		-0.00404741	-0.00871805	-0.0104951	0.0104917		Q3/2001	4.14	133.15	28.15	373.74
Q4/2001	2001-12-31	4.18	132.09	28.37	83.32	19.99	37.59	58.35	58.27	94.15	23.71		103.35	100.06	93.34	104.22	104.61	101.3		-0.0615385	-0.0069958	0.0151061	-0.000870603		Q4/2001	4.18	132.09	28.37	375.38
Q1/2002	2002-03-31	4.04	130.63	28.16	83.68	20.3	37.21	58.47	58.12	94.98	23.27		96.99	99.36	94.75	102.99	104.73	102.14		0.00319621	0.00523349	-0.0442216	-0.000387272		Q1/2002	4.04	130.63	28.16	376.03
Q2/2002	2002-06-30	4.12	131.51	27.24	83.81	20.3	37.02	58.75	58.23	95.02	23.24		97.3	99.88	90.56	102.62	104.95	102.17		-0.00873587	0.00600721	-0.0059629	0.00158197		Q2/2002	4.12	131.51	27.24	376.37
Q3/2002	2002-09-30	4.1	132.63	27.18	84.3	20.27	35.58	59.29	58.58	95.47	23.19		96.45	100.48	90.02	102.79	105.06	102.38		-0.0101607	0.0035828	-0.019329	0.0027399		Q3/2002	4.1	132.63	27.18	376.68
Q4/2002	2002-12-31	4.13	132.6	26.66	85	20.61	33.86	59.72	58.2	96	23		95.47	100.84	88.28	103.29	105	102.79		-0.0301665	-0.000892503	-0.0208428	-0.00475762		Q4/2002	4.13	132.6	26.66	376.39
Q1/2003	2003-03-31	4.14	132.38	26	84.56	18.55	31.85	59.34	58.44	95.28	22.95		92.59	100.75	86.44	102.23	105.36	102.01		-0.00918026	-0.0131017	0.0118001	-0.00232558		Q1/2003	4.14	132.38	26	370.97
Q2/2003	2003-06-30	4.2	131.58	26.14	85.1	18.43	30.15	59.78	58.13	95.3	22.91		91.74	99.43	87.46	102.47	104.46	101.95		-0.0166776	0.00633612	-0.00457352	0.00828801		Q2/2003	4.2	131.58	26.14	369.8
Q3/2003	2003-09-30	4.24	132.21	26.27	86.54	18.63	29.06	60.65	59.65	95.68	23.22		90.21	100.06	87.06	103.19	105.7	102.55		0.0021062	0.0174895	-0.0190673	-0.00122014		Q3/2003	4.24	132.21	26.27	373.43
Q4/2003	2003-12-31	4.2	134.09	25.71	86.7	18.81	28.91	60.47	59.44	95.96	23.04		90.4	101.81	85.4	102.84	105.61	102.61		0.226327	0.0131618	0.000702576	-0.00311837		Q4/2003	4.2	134.09	25.71	373.33
Q1/2004	2004-03-31	5.73	135.06	25.79	85.99	19.88	28.17	59.88	57.54	95.34	23.51		110.86	103.15	85.46	102.97	104.38	102.74		-0.0071261	0.0165778	-0.0202434	0.00399884		Q1/2004	5.73	135.06	25.79	370.31
Q2/2004	2004-06-30	5.62	137.53	25.25	87.49	20.05	27.47	60.73	57.91	95.35	23.69		110.07	104.86	83.73	103.93	104.84	102.56		0.00635959	-0.00534045	-0.0383375	-0.00170237		Q2/2004	5.62	137.53	25.25	372.69
Q3/2004	2004-09-30	5.52	137.37	24.6	87.16	20	27.19	60.73	58.26	95.44	23.58		110.77	104.3	80.52	103.59	104.83	102.38		-0.0197707	-0.005465	0.00384998	0.000579151		Q3/2004	5.52	137.37	24.6	372.36
Q4/2004	2004-12-31	5.46	136.17	24.19	87.84	20.29	27.44	60.87	58.4	95.45	23.54		108.58	103.73	80.83	103.81	104.79	102.38		-0.105913	0.00433819	-0.0498577	0.0114477		Q4/2004	5.46	136.17	24.19	373.83
Q1/2005	2005-03-31	4.09	137.04	23.74	88.62	19.24	27.55	61.37	58.3	95.66	23.51		97.08	104.18	76.8	103.92	107.66	102.96		0.0290482	0.0106546	0.028776	0.00206651		Q1/2005	4.09	137.04	23.74	374.25
Q2/2005	2005-06-30	4.07	137.53	23.96	88.73	19.9	27.22	61.78	59.27	95.65	23.67		99.9	105.29	79.01	104.67	107.51	103.01		0.00500501	0.00778801	0.00379699	0.000983534		Q2/2005	4.07	137.53	23.96	376.22
Q3/2005	2005-09-30	4.02	139.43	24.28	89.82	19.9	27.14	62.21	59.62	95.96	23.66		100.4	106.11	79.31	105.04	107.52	102.94		-0.0423307	0.00895297	0.00945656	-3.16957e-05		Q3/2005	4.02	139.43	24.28	378.31
Q4/2005	2005-12-31	3.93	140.98	23.8	90.39	20.05	26.89	62.38	60.37	96.08	23.85		96.15	107.06	80.06	104.32	107.94	103.23		-0.00374415	0.020736	-0.0278541	0.00757552		Q4/2005	3.93	140.98	23.8	380.01
Q1/2006	2006-03-31	3.87	143.82	22.69	94.34	21.1	25.92	61.98	59.25	96.08	24.11		95.79	109.28	77.83	106.22	108.54	103.12		-0.00689007	0.0150988	0.0836438	0.0117025		Q1/2006	3.87	143.82	22.69	382.78
Q2/2006	2006-06-30	3.81	146.91	23.86	96.1	21.46	26.7	62.33	60.13	96.38	24.06		95.13	110.93	84.34	108.23	109.93	103.44		0.00746347	0.0155954	0.0171923	0.00516169		Q2/2006	3.81	146.91	23.86	387.16
Q3/2006	2006-09-30	3.75	148.75	24.42	96.54	21.81	29.84	62.34	61.44	96.28	24.06		95.84	112.66	85.79	109.34	110.55	103.37		-0.0148164	0.00940884	0.0206318	0.00696034		Q3/2006	3.75	148.75	24.42	392.31
Q4/2006	2006-12-31	3.73	150.66	25.16	99.68	22.33	27	63.73	62.77	96.38	24.23		94.42	113.72	87.56	110.72	111.4	103.39		0.0507308	0.0191699	0.015989	0.00221191		Q4/2006	3.73	150.66	25.16	396.12
Q1/2007	2007-03-31	4.86	151.11	24.44	97.12	24.39	27.78	64.42	63.59	97.21	24.33		99.21	115.9	88.96	109.74	112.48	104.01		-0.0157242	0.0096635	-0.0492356	0.00646783		Q1/2007	4.86	151.11	24.44	398.84
Q2/2007	2007-06-30	4.76	153.96	23.36	99.1	24.08	28.16	64.77	64.43	97.65	24.37		97.65	117.02	84.58	110.81	113.49	104.04		0.0119816	0.0165784	-0.00248286	0.00325882		Q2/2007	4.76	153.96	23.36	402.56
Q3/2007	2007-09-30	4.7	156.61	23.66	100.03	24.7	28.2	65.06	65.25	97.49	24.44		98.82	118.96	84.37	112.02	113.63	103.76		-0.0225663	0.00672495	-0.00248904	0.0027018		Q3/2007	4.7	156.61	23.66	405.17
Q4/2007	2007-12-31	4.69	157.41	24.24	100.91	25.05	28	65.18	65.6	97.05	24.4		96.59	119.76	84.16	111.48	114.89	103.93							Q4/2007	4.69	157.41	24.24	406.19
Q1/2008	2008-03-31	5.79	155.74	24.63	101	25.81	27.85	66.1	65.98	99.53	24.82														Q1/2008	5.79	155.74	24.63	411.09
Q2/2008	2008-06-30	5.71	155.32	23.42	99.49	25.88	27.85	66.59	66.62	99.78	25.09														Q2/2008	5.71	155.32	23.42	411.3
Q3/2008	2008-09-30	5.68	153.29	23.29	99.81	26.04	27.76	66.49	65.9	100.27	25														Q3/2008	5.68	153.29	23.29	411.27
Q4/2008	2008-12-31	5.66	142.92	23.39	97.78	26.33	27.54	65.83	65.52	100.29	24.94														Q4/2008	5.66	142.92	23.39	408.23
Q1/2009	2009-03-31	5.57	126.67	23.08	94.19	25.06	26.66	67	59.99	100.65	24.33														Q1/2009	5.57	126.67	23.08	397.88
Q2/2009	2009-06-30	5.54	126.5	23.03	93.6	25.66	25.8	67.7	59.02	101.34	24.3														Q2/2009	5.54	126.5	23.03	397.42
Q3/2009	2009-09-30	5.51	130.57	23.05	93.48	25.85	25.35	67.85	58.65	101.91	24.26														Q3/2009	5.51	130.57	23.05	397.35
Q4/2009	2009-12-31	5.47	132.03	22.89	93.98	26.42	25.72	68.07	59.12	102.71	24.3														Q4/2009	5.47	132.03	22.89	400.32
Q1/2010	2010-03-31	4.18	143.04	23.82	89.96	25.5	26.15	67.25	60.76	103.34	24.18														Q1/2010	4.18	143.04	23.82	397.14
Q2/2010	2010-06-30	4.17	147.42	25.65	91.83	25.63	26.74	66.53	61.01	103.15	24.06														Q2/2010	4.17	147.42	25.65	398.95
Q3/2010	2010-09-30	4.14	150.03	25.16	93.46	25.88	26.59	66.87	61.49	103.61	24.03														Q3/2010	4.14	150.03	25.16	401.93
Q4/2010	2010-12-31	4.21	154.22	24.13	93.02	26.14	26.61	66.63	62.6	103.61	24.19														Q4/2010	4.21	154.22	24.13	402.8
Q1/2011	2011-03-31	3.76	155.9	25.41	95.24	28.28	26.65	69.29	63.06	104.96	24.43														Q1/2011	3.76	155.9	25.41	411.91
Q2/2011	2011-06-30	3.73	156.23	25.7	95.09	28.64	26.81	68.78	62.71	105.02	24.11														Q2/2011	3.73	156.23	25.7	411.16
Q3/2011	2011-09-30	3.74	158.5	25.39	96.38	28.74	26.78	69.19	62.73	105.3	23.96														Q3/2011	3.74	158.5	25.39	413.08
Q4/2011	2011-12-31	3.74	157.16	26.19	96.21	28.99	26.32	69.37	63.22	105.28	23.99														Q4/2011	3.74	157.16	26.19	413.38
Q1/2012	2012-03-31	3.74	157.34	25.72	98.71	29.54	26.36	67.94	64.11	105.26	24.21														Q1/2012	3.74	157.34	25.72	416.13
Q2/2012	2012-06-30	3.72	157.95	25.75	99.11	29.71	26.44	67.92	63.71	105.73	23.98														Q2/2012	3.72	157.95	25.75	416.6
Q3/2012	2012-09-30	3.71	158.38	25.57	99.02	30.07	26.95	67.89	63.64	106.26	24														Q3/2012	3.71	158.38	25.57	417.83
Q4/2012	2012-12-31	3.68	155.01	25.22	98.22	30.27	27.88	67.74	63.41	106.45	23.85														Q4/2012	3.68	155.01	25.22	417.82
Q1/2013	2013-03-31	3.9	155.56	24.15	97.23	30.6	28.65	69.63	63.18	105.23	23.85														Q1/2013	3.9	155.56	24.15	418.37
Q2/2013	2013-06-30	3.89	156.16	24.78	97.9	30.73	29.67	69.44	63.67	105.76	23.92														Q2/2013	3.89	156.16	24.78	421.09
Q3/2013	2013-09-30	3.9	156.91	25.24	98.48	30.92	29.96	69.72	63.99	106.05	23.95														Q3/2013	3.9	156.91	25.24	423.07
Q4/2013	2013-12-31	3.92	159.55	25.55	98.68	31.29	29.15	70.19	64.38	106.61	23.79														Q4/2013	3.92	159.55	25.55	424.09
Q1/2014	2014-03-31	3.41	165.39	26.09	99.46	32.01	28.37	68.89	64.98	106.41	23.85														Q1/2014	3.41	165.39	26.09	423.97
Q2/2014	2014-06-30	3.44	164.09	25.53	99.12	32.28	27.81	68.82	64.84	106.38	23.73														Q2/2014	3.44	164.09	25.53	422.98
Q3/2014	2014-09-30	3.45	164.9	25.51	99.8	32.52	27.66	68.88	65.65	106.49	23.85														Q3/2014	3.45	164.9	25.51	424.85
Q4/2014	2014-12-31	3.45	167.2	25.38	100.8	32.54	27.8	69	65.78	107.41	23.8														Q4/2014	3.45	167.2	25.38	427.13
Q1/2015	2015-03-31	3.95	167.29	25.51	100.19	32.46	27.81	68.86	65.87	108.48	23.9														Q1/2015	3.95	167.29	25.51	427.57
Q2/2015	2015-06-30	3.96	168.12	25.39	99.99	33.05	27.57	69.05	66.44	108.78	23.93														Q2/2015	3.96	168.12	25.39	428.81
Q3/2015	2015-09-30	4	168.75	25.4	100.19	33.23	27.52	69.13	66.73	109.06	24														Q3/2015	4	168.75	25.4	429.86
Q4/2015	2015-12-31	4	168.04	25.62	100.1	33.85	27.81	69.07	66.81	109.47	24														Q4/2015	4	168.04	25.62	431.11
Q1/2016	2016-03-31	3.95	170.8	25.89	101.76	33.57	28.42	69.2	66.66	110.41	23.85														Q1/2016	3.95	170.8	25.89	433.87
Q2/2016	2016-06-30	3.96	170.07	25.96	101.96	33.78	28.46	69.63	68.12	111.17	24.29														Q2/2016	3.96	170.07	25.96	437.41
Q3/2016	2016-09-30	3.95	171.32	25.98	101.96	34.4	28.65	69.43	67.85	111.67	24.27														Q3/2016	3.95	171.32	25.98	438.23
Q4/2016	2016-12-31	3.96	171.4	25.83	103.17	34.45	28.52	69.43	68.06	112.31	24.3														Q4/2016	3.96	171.4	25.83	440.24
Q1/2017	2017-03-31	3.93	172.76	26.47	104.84	34.92	28.44	70.11	68.84	112.83	24.42														Q1/2017	3.93	172.76	26.47	444.4
Q2/2017	2017-06-30	3.91	174.83	26.77	105.74	35.13	28.49	69.95	68.93	113.83	24.44														Q2/2017	3.91	174.83	26.77	446.51
Q3/2017	2017-09-30	3.9	178.06	26.74	105.82	35.74	28.55	70.36	69.76	114.39	24.65														Q3/2017	3.9	178.06	26.74	449.27
Q4/2017	2017-12-31	3.9	180.7	27.01	106.51	35.91	28.65	70.44	69.87	114.56	24.54														Q4/2017	3.9	180.7	27.01	450.48
Q1/2018	2018-03-31	3.92	179.64	27.12	107.87	36.14	28.73	70.8	70.21	114.73	24.5

## Sheet: Italy (Quarterly)
Q1/1960 !Q mag=bil	.excel_last	S136GC@G10	S136GAFC@G10	S136G2XC@G10	S136GCOC@G10	S136GSC@G10
.DESC		Italy: Gross Value Added (SA/WDA, Bil.Chn.2010.EUR)	Italy: GVA: Agriculture, Forestry & Fishing (SA/WDA, Bil.Chn.2010.EUR)	Italy: GVA: Industry excluding Construction (SA/WDA, Bil.Chn.2010.EUR)	Italy: GVA: Construction (SA/WDA, Bil.Chn.2010.EUR)	Italy: GVA: Services (SA/WDA, Bil.Chn.2010.EUR)
.T1		Q1-1981	Q1-1981	Q1-1981	Q1-1981	Q1-1996
.TN		Q2-2018	Q2-2018	Q2-2018	Q2-2018	Q2-2018
.LSOURCE		Istituto Nazionale di Statistica	Istituto Nazionale di Statistica	Istituto Nazionale di Statistica	Istituto Nazionale di Statistica	Istituto Nazionale di Statistica			FINAL SERIES
.DTLM		Oct-03-2018 05:04	Oct-03-2018 05:04	Oct-03-2018 05:04	Oct-03-2018 05:04	Oct-03-2018 05:04			PRIMARY	SECONDARY	CONSTRUCTION	TERTIARY
Q1/1960	1960-03-31	#N/A	#N/A	#N/A	#N/A	#N/A		Q1/1960	#N/A	#N/A	#N/A	#N/A
Q2/1960	1960-06-30	#N/A	#N/A	#N/A	#N/A	#N/A		Q2/1960	#N/A	#N/A	#N/A	#N/A
Q3/1960	1960-09-30	#N/A	#N/A	#N/A	#N/A	#N/A		Q3/1960	#N/A	#N/A	#N/A	#N/A
Q4/1960	1960-12-31	#N/A	#N/A	#N/A	#N/A	#N/A		Q4/1960	#N/A	#N/A	#N/A	#N/A
Q1/1961	1961-03-31	#N/A	#N/A	#N/A	#N/A	#N/A		Q1/1961	#N/A	#N/A	#N/A	#N/A
Q2/1961	1961-06-30	#N/A	#N/A	#N/A	#N/A	#N/A		Q2/1961	#N/A	#N/A	#N/A	#N/A
Q3/1961	1961-09-30	#N/A	#N/A	#N/A	#N/A	#N/A		Q3/1961	#N/A	#N/A	#N/A	#N/A
Q4/1961	1961-12-31	#N/A	#N/A	#N/A	#N/A	#N/A		Q4/1961	#N/A	#N/A	#N/A	#N/A
Q1/1962	1962-03-31	#N/A	#N/A	#N/A	#N/A	#N/A		Q1/1962	#N/A	#N/A	#N/A	#N/A
Q2/1962	1962-06-30	#N/A	#N/A	#N/A	#N/A	#N/A		Q2/1962	#N/A	#N/A	#N/A	#N/A
Q3/1962	1962-09-30	#N/A	#N/A	#N/A	#N/A	#N/A		Q3/1962	#N/A	#N/A	#N/A	#N/A
Q4/1962	1962-12-31	#N/A	#N/A	#N/A	#N/A	#N/A		Q4/1962	#N/A	#N/A	#N/A	#N/A
Q1/1963	1963-03-31	#N/A	#N/A	#N/A	#N/A	#N/A		Q1/1963	#N/A	#N/A	#N/A	#N/A
Q2/1963	1963-06-30	#N/A	#N/A	#N/A	#N/A	#N/A		Q2/1963	#N/A	#N/A	#N/A	#N/A
Q3/1963	1963-09-30	#N/A	#N/A	#N/A	#N/A	#N/A		Q3/1963	#N/A	#N/A	#N/A	#N/A
Q4/1963	1963-12-31	#N/A	#N/A	#N/A	#N/A	#N/A		Q4/1963	#N/A	#N/A	#N/A	#N/A
Q1/1964	1964-03-31	#N/A	#N/A	#N/A	#N/A	#N/A		Q1/1964	#N/A	#N/A	#N/A	#N/A
Q2/1964	1964-06-30	#N/A	#N/A	#N/A	#N/A	#N/A		Q2/1964	#N/A	#N/A	#N/A	#N/A
Q3/1964	1964-09-30	#N/A	#N/A	#N/A	#N/A	#N/A		Q3/1964	#N/A	#N/A	#N/A	#N/A
Q4/1964	1964-12-31	#N/A	#N/A	#N/A	#N/A	#N/A		Q4/1964	#N/A	#N/A	#N/A	#N/A
Q1/1965	1965-03-31	#N/A	#N/A	#N/A	#N/A	#N/A		Q1/1965	#N/A	#N/A	#N/A	#N/A
Q2/1965	1965-06-30	#N/A	#N/A	#N/A	#N/A	#N/A		Q2/1965	#N/A	#N/A	#N/A	#N/A
Q3/1965	1965-09-30	#N/A	#N/A	#N/A	#N/A	#N/A		Q3/1965	#N/A	#N/A	#N/A	#N/A
Q4/1965	1965-12-31	#N/A	#N/A	#N/A	#N/A	#N/A		Q4/1965	#N/A	#N/A	#N/A	#N/A
Q1/1966	1966-03-31	#N/A	#N/A	#N/A	#N/A	#N/A		Q1/1966	#N/A	#N/A	#N/A	#N/A
Q2/1966	1966-06-30	#N/A	#N/A	#N/A	#N/A	#N/A		Q2/1966	#N/A	#N/A	#N/A	#N/A
Q3/1966	1966-09-30	#N/A	#N/A	#N/A	#N/A	#N/A		Q3/1966	#N/A	#N/A	#N/A	#N/A
Q4/1966	1966-12-31	#N/A	#N/A	#N/A	#N/A	#N/A		Q4/1966	#N/A	#N/A	#N/A	#N/A
Q1/1967	1967-03-31	#N/A	#N/A	#N/A	#N/A	#N/A		Q1/1967	#N/A	#N/A	#N/A	#N/A
Q2/1967	1967-06-30	#N/A	#N/A	#N/A	#N/A	#N/A		Q2/1967	#N/A	#N/A	#N/A	#N/A
Q3/1967	1967-09-30	#N/A	#N/A	#N/A	#N/A	#N/A		Q3/1967	#N/A	#N/A	#N/A	#N/A
Q4/1967	1967-12-31	#N/A	#N/A	#N/A	#N/A	#N/A		Q4/1967	#N/A	#N/A	#N/A	#N/A
Q1/1968	1968-03-31	#N/A	#N/A	#N/A	#N/A	#N/A		Q1/1968	#N/A	#N/A	#N/A	#N/A
Q2/1968	1968-06-30	#N/A	#N/A	#N/A	#N/A	#N/A		Q2/1968	#N/A	#N/A	#N/A	#N/A
Q3/1968	1968-09-30	#N/A	#N/A	#N/A	#N/A	#N/A		Q3/1968	#N/A	#N/A	#N/A	#N/A
Q4/1968	1968-12-31	#N/A	#N/A	#N/A	#N/A	#N/A		Q4/1968	#N/A	#N/A	#N/A	#N/A
Q1/1969	1969-03-31	#N/A	#N/A	#N/A	#N/A	#N/A		Q1/1969	#N/A	#N/A	#N/A	#N/A
Q2/1969	1969-06-30	#N/A	#N/A	#N/A	#N/A	#N/A		Q2/1969	#N/A	#N/A	#N/A	#N/A
Q3/1969	1969-09-30	#N/A	#N/A	#N/A	#N/A	#N/A		Q3/1969	#N/A	#N/A	#N/A	#N/A
Q4/1969	1969-12-31	#N/A	#N/A	#N/A	#N/A	#N/A		Q4/1969	#N/A	#N/A	#N/A	#N/A
Q1/1970	1970-03-31	#N/A	#N/A	#N/A	#N/A	#N/A		Q1/1970	#N/A	#N/A	#N/A	#N/A
Q2/1970	1970-06-30	#N/A	#N/A	#N/A	#N/A	#N/A		Q2/1970	#N/A	#N/A	#N/A	#N/A
Q3/1970	1970-09-30	#N/A	#N/A	#N/A	#N/A	#N/A		Q3/1970	#N/A	#N/A	#N/A	#N/A
Q4/1970	1970-12-31	#N/A	#N/A	#N/A	#N/A	#N/A		Q4/1970	#N/A	#N/A	#N/A	#N/A
Q1/1971	1971-03-31	#N/A	#N/A	#N/A	#N/A	#N/A		Q1/1971	#N/A	#N/A	#N/A	#N/A
Q2/1971	1971-06-30	#N/A	#N/A	#N/A	#N/A	#N/A		Q2/1971	#N/A	#N/A	#N/A	#N/A
Q3/1971	1971-09-30	#N/A	#N/A	#N/A	#N/A	#N/A		Q3/1971	#N/A	#N/A	#N/A	#N/A
Q4/1971	1971-12-31	#N/A	#N/A	#N/A	#N/A	#N/A		Q4/1971	#N/A	#N/A	#N/A	#N/A
Q1/1972	1972-03-31	#N/A	#N/A	#N/A	#N/A	#N/A		Q1/1972	#N/A	#N/A	#N/A	#N/A
Q2/1972	1972-06-30	#N/A	#N/A	#N/A	#N/A	#N/A		Q2/1972	#N/A	#N/A	#N/A	#N/A
Q3/1972	1972-09-30	#N/A	#N/A	#N/A	#N/A	#N/A		Q3/1972	#N/A	#N/A	#N/A	#N/A
Q4/1972	1972-12-31	#N/A	#N/A	#N/A	#N/A	#N/A		Q4/1972	#N/A	#N/A	#N/A	#N/A
Q1/1973	1973-03-31	#N/A	#N/A	#N/A	#N/A	#N/A		Q1/1973	#N/A	#N/A	#N/A	#N/A
Q2/1973	1973-06-30	#N/A	#N/A	#N/A	#N/A	#N/A		Q2/1973	#N/A	#N/A	#N/A	#N/A
Q3/1973	1973-09-30	#N/A	#N/A	#N/A	#N/A	#N/A		Q3/1973	#N/A	#N/A	#N/A	#N/A
Q4/1973	1973-12-31	#N/A	#N/A	#N/A	#N/A	#N/A		Q4/1973	#N/A	#N/A	#N/A	#N/A
Q1/1974	1974-03-31	#N/A	#N/A	#N/A	#N/A	#N/A		Q1/1974	#N/A	#N/A	#N/A	#N/A
Q2/1974	1974-06-30	#N/A	#N/A	#N/A	#N/A	#N/A		Q2/1974	#N/A	#N/A	#N/A	#N/A
Q3/1974	1974-09-30	#N/A	#N/A	#N/A	#N/A	#N/A		Q3/1974	#N/A	#N/A	#N/A	#N/A
Q4/1974	1974-12-31	#N/A	#N/A	#N/A	#N/A	#N/A		Q4/1974	#N/A	#N/A	#N/A	#N/A
Q1/1975	1975-03-31	#N/A	#N/A	#N/A	#N/A	#N/A		Q1/1975	#N/A	#N/A	#N/A	#N/A
Q2/1975	1975-06-30	#N/A	#N/A	#N/A	#N/A	#N/A		Q2/1975	#N/A	#N/A	#N/A	#N/A
Q3/1975	1975-09-30	#N/A	#N/A	#N/A	#N/A	#N/A		Q3/1975	#N/A	#N/A	#N/A	#N/A
Q4/1975	1975-12-31	#N/A	#N/A	#N/A	#N/A	#N/A		Q4/1975	#N/A	#N/A	#N/A	#N/A
Q1/1976	1976-03-31	#N/A	#N/A	#N/A	#N/A	#N/A		Q1/1976	#N/A	#N/A	#N/A	#N/A
Q2/1976	1976-06-30	#N/A	#N/A	#N/A	#N/A	#N/A		Q2/1976	#N/A	#N/A	#N/A	#N/A
Q3/1976	1976-09-30	#N/A	#N/A	#N/A	#N/A	#N/A		Q3/1976	#N/A	#N/A	#N/A	#N/A
Q4/1976	1976-12-31	#N/A	#N/A	#N/A	#N/A	#N/A		Q4/1976	#N/A	#N/A	#N/A	#N/A
Q1/1977	1977-03-31	#N/A	#N/A	#N/A	#N/A	#N/A		Q1/1977	#N/A	#N/A	#N/A	#N/A
Q2/1977	1977-06-30	#N/A	#N/A	#N/A	#N/A	#N/A		Q2/1977	#N/A	#N/A	#N/A	#N/A
Q3/1977	1977-09-30	#N/A	#N/A	#N/A	#N/A	#N/A		Q3/1977	#N/A	#N/A	#N/A	#N/A
Q4/1977	1977-12-31	#N/A	#N/A	#N/A	#N/A	#N/A		Q4/1977	#N/A	#N/A	#N/A	#N/A
Q1/1978	1978-03-31	#N/A	#N/A	#N/A	#N/A	#N/A		Q1/1978	#N/A	#N/A	#N/A	#N/A
Q2/1978	1978-06-30	#N/A	#N/A	#N/A	#N/A	#N/A		Q2/1978	#N/A	#N/A	#N/A	#N/A
Q3/1978	1978-09-30	#N/A	#N/A	#N/A	#N/A	#N/A		Q3/1978	#N/A	#N/A	#N/A	#N/A
Q4/1978	1978-12-31	#N/A	#N/A	#N/A	#N/A	#N/A		Q4/1978	#N/A	#N/A	#N/A	#N/A
Q1/1979	1979-03-31	#N/A	#N/A	#N/A	#N/A	#N/A		Q1/1979	#N/A	#N/A	#N/A	#N/A
Q2/1979	1979-06-30	#N/A	#N/A	#N/A	#N/A	#N/A		Q2/1979	#N/A	#N/A	#N/A	#N/A
Q3/1979	1979-09-30	#N/A	#N/A	#N/A	#N/A	#N/A		Q3/1979	#N/A	#N/A	#N/A	#N/A
Q4/1979	1979-12-31	#N/A	#N/A	#N/A	#N/A	#N/A		Q4/1979	#N/A	#N/A	#N/A	#N/A
Q1/1980	1980-03-31	#N/A	#N/A	#N/A	#N/A	#N/A		Q1/1980	#N/A	#N/A	#N/A	#N/A
Q2/1980	1980-06-30	#N/A	#N/A	#N/A	#N/A	#N/A		Q2/1980	#N/A	#N/A	#N/A	#N/A
Q3/1980	1980-09-30	#N/A	#N/A	#N/A	#N/A	#N/A		Q3/1980	#N/A	#N/A	#N/A	#N/A
Q4/1980	1980-12-31	#N/A	#N/A	#N/A	#N/A	#N/A		Q4/1980	#N/A	#N/A	#N/A	#N/A
Q1/1981	1981-03-31	233.031	5.022	50.544	19.301	#N/A		Q1/1981	5.022	50.544	19.301	157.593
Q2/1981	1981-06-30	234.346	5.132	50.554	19.634	#N/A		Q2/1981	5.132	50.554	19.634	158.452
Q3/1981	1981-09-30	234.851	5.107	49.946	19.816	#N/A		Q3/1981	5.107	49.946	19.816	159.405
Q4/1981	1981-12-31	236.994	5.28	50.101	19.743	#N/A		Q4/1981	5.28	50.101	19.743	161.286
Q1/1982	1982-03-31	235.989	5.116	50.41	20.006	#N/A		Q1/1982	5.116	50.41	20.006	159.878
Q2/1982	1982-06-30	235.484	5.081	49.392	19.943	#N/A		Q2/1982	5.081	49.392	19.943	160.487
Q3/1982	1982-09-30	235.674	4.976	49.215	19.885	#N/A		Q3/1982	4.976	49.215	19.885	161.015
Q4/1982	1982-12-31	235.841	4.803	48.763	20.077	#N/A		Q4/1982	4.803	48.763	20.077	161.613
Q1/1983	1983-03-31	235.616	5.123	49.242	20.081	#N/A		Q1/1983	5.123	49.242	20.081	160.589
Q2/1983	1983-06-30	235.794	5.072	49.064	20.08	#N/A		Q2/1983	5.072	49.064	20.08	160.995
Q3/1983	1983-09-30	239.71	5.262	50.517	20.044	#N/A		Q3/1983	5.262	50.517	20.044	163.296
Q4/1983	1983-12-31	245.657	6.32	51.041	19.768	#N/A		Q4/1983	6.32	51.041	19.768	167.92
Q1/1984	1984-03-31	244.458	5.453	50.811	19.368	#N/A		Q1/1984	5.453	50.811	19.368	168.217
Q2/1984	1984-06-30	245.991	5.649	51.309	19.166	#N/A		Q2/1984	5.649	51.309	19.166	169.254
Q3/1984	1984-09-30	248.64	5.514	52.195	19.056	#N/A		Q3/1984	5.514	52.195	19.056	171.255
Q4/1984	1984-12-31	249.213	4.859	52.25	18.979	#N/A		Q4/1984	4.859	52.25	18.979	172.5
Q1/1985	1985-03-31	249.993	5.477	52.379	18.809	#N/A		Q1/1985	5.477	52.379	18.809	172.703
Q2/1985	1985-06-30	253.562	5.415	53.247	18.928	#N/A		Q2/1985	5.415	53.247	18.928	175.337
Q3/1985	1985-09-30	255.603	5.107	53.802	18.813	#N/A		Q3/1985	5.107	53.802	18.813	177.239
Q4/1985	1985-12-31	257.94	5.615	53.479	18.765	#N/A		Q4/1985	5.615	53.479	18.765	179.431
Q1/1986	1986-03-31	258.674	5.556	54.342	18.795	#N/A		Q1/1986	5.556	54.342	18.795	179.332
Q2/1986	1986-06-30	260.348	5.618	54.451	18.44	#N/A		Q2/1986	5.618	54.451	18.44	181.183
Q3/1986	1986-09-30	262.95	5.744	55.247	18.5	#N/A		Q3/1986	5.744	55.247	18.5	182.797
Q4/1986	1986-12-31	264.217	5.343	55.221	18.603	#N/A		Q4/1986	5.343	55.221	18.603	184.382
Q1/1987	1987-03-31	265.236	5.577	55.171	18.562	#N/A		Q1/1987	5.577	55.171	18.562	185.255
Q2/1987	1987-06-30	269.316	5.718	56.89	18.704	#N/A		Q2/1987	5.718	56.89	18.704	187.326
Q3/1987	1987-09-30	269.983	5.995	56.616	18.671	#N/A		Q3/1987	5.995	56.616	18.671	188.02
Q4/1987	1987-12-31	272.797	5.94	57.604	18.597	#N/A		Q4/1987	5.94	57.604	18.597	189.968
Q1/1988	1988-03-31	277.501	5.77	59.582	18.795	#N/A		Q1/1988	5.77	59.582	18.795	192.656
Q2/1988	1988-06-30	278.913	5.757	59.781	19.041	#N/A		Q2/1988	5.757	59.781	19.041	193.633
Q3/1988	1988-09-30	282.263	5.805	60.541	19.179	#N/A		Q3/1988	5.805	60.541	19.179	196.028
Q4/1988	1988-12-31	285.3	5.558	62.11	19.379	#N/A		Q4/1988	5.558	62.11	19.379	197.538
Q1/1989	1989-03-31	287.629	5.798	62.487	19.609	#N/A		Q1/1989	5.798	62.487	19.609	199.014
Q2/1989	1989-06-30	289.154	5.738	62.909	19.685	#N/A		Q2/1989	5.738	62.909	19.685	200.097
Q3/1989	1989-09-30	291.926	5.902	63.517	20.095	#N/A		Q3/1989	5.902	63.517	20.095	201.682
Q4/1989	1989-12-31	295.098	5.879	64.783	20.36	#N/A		Q4/1989	5.879	64.783	20.36	203.34
Q1/1990	1990-03-31	296.47	6.038	63.82	20.35	#N/A		Q1/1990	6.038	63.82	20.35	205.518
Q2/1990	1990-06-30	296.875	6.093	64.218	20.375	#N/A		Q2/1990	6.093	64.218	20.375	205.445
Q3/1990	1990-09-30	297.397	6.192	64.274	20.327	#N/A		Q3/1990	6.192	64.274	20.327	205.859
Q4/1990	1990-12-31	294.872	4.718	63.61	20.412	#N/A		Q4/1990	4.718	63.61	20.412	205.388
Q1/1991	1991-03-31	298.636	6.04	63.711	20.628	#N/A		Q1/1991	6.04	63.711	20.628	207.506
Q2/1991	1991-06-30	299.831	6.256	63.459	20.788	#N/A		Q2/1991	6.256	63.459	20.788	208.573
Q3/1991	1991-09-30	301.326	6.191	64.185	20.958	#N/A		Q3/1991	6.191	64.185	20.958	209.234
Q4/1991	1991-12-31	302.874	6.696	64.073	20.992	#N/A		Q4/1991	6.696	64.073	20.992	210.351
Q1/1992	1992-03-31	304.36	6.308	64.386	20.874	#N/A		Q1/1992	6.308	64.386	20.874	212.024
Q2/1992	1992-06-30	303.727	6.489	64.316	20.753	#N/A		Q2/1992	6.489	64.316	20.753	211.404
Q3/1992	1992-09-30	303.538	6.868	62.621	20.496	#N/A		Q3/1992	6.868	62.621	20.496	212.783
Q4/1992	1992-12-31	301.387	6.275	61.966	20.206	#N/A		Q4/1992	6.275	61.966	20.206	212.172
Q1/1993	1993-03-31	301.532	6.347	61.791	19.976	#N/A		Q1/1993	6.347	61.791	19.976	212.648
Q2/1993	1993-06-30	301.221	6.403	61.255	19.606	#N/A		Q2/1993	6.403	61.255	19.606	213.185
Q3/1993	1993-09-30	300.93	6.457	61.261	19.319	#N/A		Q3/1993	6.457	61.261	19.319	213.121
Q4/1993	1993-12-31	303.027	6.615	62.206	19.123	#N/A		Q4/1993	6.615	62.206	19.123	214.307
Q1/1994	1994-03-31	306.056	6.574	63.308	18.777	#N/A		Q1/1994	6.574	63.308	18.777	216.613
Q2/1994	1994-06-30	307.727	6.604	65.688	18.543	#N/A		Q2/1994	6.604	65.688	18.543	216.109
Q3/1994	1994-09-30	309.698	6.635	67.013	18.418	#N/A		Q3/1994	6.635	67.013	18.418	216.847
Q4/1994	1994-12-31	312.672	6.384	67.996	18.489	#N/A		Q4/1994	6.384	67.996	18.489	219.01
Q1/1995	1995-03-31	316.575	6.658	68.469	18.487	#N/A		Q1/1995	6.658	68.469	18.487	222.157
Q2/1995	1995-06-30	316.786	6.656	68.872	18.554	#N/A		Q2/1995	6.656	68.872	18.554	221.901
Q3/1995	1995-09-30	318.487	6.515	69.471	18.811	#N/A		Q3/1995	6.515	69.471	18.811	222.883
Q4/1995	1995-12-31	321.069	6.82	70.119	19.568	#N/A		Q4/1995	6.82	70.119	19.568	223.752
Q1/1996	1996-03-31	322.467	6.764	70.207	19.046	225.633		Q1/1996	6.764	70.207	19.046	225.633
Q2/1996	1996-06-30	321.555	6.849	68.987	19.418	225.612		Q2/1996	6.849	68.987	19.418	225.612
Q3/1996	1996-09-30	321.819	7.059	68.507	19.207	226.287		Q3/1996	7.059	68.507	19.207	226.287
Q4/1996	1996-12-31	321.382	6.758	67.888	18.828	227.36		Q4/1996	6.758	67.888	18.828	227.36
Q1/1997	1997-03-31	321.998	6.974	67.905	18.496	227.912		Q1/1997	6.974	67.905	18.496	227.912
Q2/1997	1997-06-30	326.308	6.902	69.547	18.3	230.791		Q2/1997	6.902	69.547	18.3	230.791
Q3/1997	1997-09-30	328.026	6.926	70.267	18.402	231.621		Q3/1997	6.926	70.267	18.402	231.621
Q4/1997	1997-12-31	333.315	7.229	71.001	19.367	234.912		Q4/1997	7.229	71.001	19.367	234.912
Q1/1998	1998-03-31	330.806	7.175	70.555	18.585	233.613		Q1/1998	7.175	70.555	18.585	233.613
Q2/1998	1998-06-30	332.121	7.364	70.712	18.56	234.528		Q2/1998	7.364	70.712	18.56	234.528
Q3/1998	1998-09-30	332.257	7.424	69.987	18.535	235.421		Q3/1998	7.424	69.987	18.535	235.421
Q4/1998	1998-12-31	330.405	6.812	69.004	18.664	235.438		Q4/1998	6.812	69.004	18.664	235.438
Q1/1999	1999-03-31	332.329	7.415	69.495	18.744	235.897		Q1/1999	7.415	69.495	18.744	235.897
Q2/1999	1999-06-30	333.671	7.543	69.114	18.714	237.552		Q2/1999	7.543	69.114	18.714	237.552
Q3/1999	1999-09-30	336.804	7.685	70.495	18.77	238.95		Q3/1999	7.685	70.495	18.77	238.95
Q4/1999	1999-12-31	341.839	7.783	71.626	19.032	242.475		Q4/1999	7.783	71.626	19.032	242.475
Q1/2000	2000-03-31	345.834	7.722	71.797	19.397	246.145		Q1/2000	7.722	71.797	19.397	246.145
Q2/2000	2000-06-30	348.391	7.601	73.256	19.593	247.131		Q2/2000	7.601	73.256	19.593	247.131
Q3/2000	2000-09-30	350.537	7.514	72.743	20.047	249.623		Q3/2000	7.514	72.743	20.047	249.623
Q4/2000	2000-12-31	355.736	7.19	73.942	19.95	254.129		Q4/2000	7.19	73.942	19.95	254.129
Q1/2001	2001-03-31	356.944	7.321	73.222	20.5	255.481		Q1/2001	7.321	73.222	20.5	255.481
Q2/2001	2001-06-30	355.936	7.198	72.057	20.833	255.607		Q2/2001	7.198	72.057	20.833	255.607
Q3/2001	2001-09-30	354.445	7.275	71.26	20.863	254.832		Q3/2001	7.275	71.26	20.863	254.832
Q4/2001	2001-12-31	354.21	7.288	70.671	21.176	254.948		Q4/2001	7.288	70.671	21.176	254.948
Q1/2002	2002-03-31	354.402	7.019	71.504	21.219	254.557		Q1/2002	7.019	71.504	21.219	254.557
Q2/2002	2002-06-30	356.432	7.027	71.855	20.628	256.751		Q2/2002	7.027	71.855	20.628	256.751
Q3/2002	2002-09-30	357.1	6.915	71.708	21.645	256.852		Q3/2002	6.915	71.708	21.645	256.852
Q4/2002	2002-12-31	358.192	6.879	72.178	22.208	257.006		Q4/2002	6.879	72.178	22.208	257.006
Q1/2003	2003-03-31	356.917	6.857	70.979	22.215	257.022		Q1/2003	6.857	70.979	22.215	257.022
Q2/2003	2003-06-30	355.978	6.633	70.418	22.182	257.007		Q2/2003	6.633	70.418	22.182	257.007
Q3/2003	2003-09-30	356.319	6.495	70.382	22.056	257.694		Q3/2003	6.495	70.382	22.056	257.694
Q4/2003	2003-12-31	359.072	6.784	71.516	22.167	258.776		Q4/2003	6.784	71.516	22.167	258.776
Q1/2004	2004-03-31	360.658	7.193	71.648	22.399	259.468		Q1/2004	7.193	71.648	22.399	259.468
Q2/2004	2004-06-30	361.868	7.384	71.991	22.473	259.998		Q2/2004	7.384	71.991	22.473	259.998
Q3/2004	2004-09-30	362.366	7.46	71.375	22.543	260.978		Q3/2004	7.46	71.375	22.543	260.978
Q4/2004	2004-12-31	362.954	7.937	71.827	22.644	260.34		Q4/2004	7.937	71.827	22.644	260.34
Q1/2005	2005-03-31	361.963	6.966	71.468	22.663	260.976		Q1/2005	6.966	71.468	22.663	260.976
Q2/2005	2005-06-30	365.215	7.036	72.237	22.94	263.115		Q2/2005	7.036	72.237	22.94	263.115
Q3/2005	2005-09-30	367.55	7.326	73.191	23.255	263.829		Q3/2005	7.326	73.191	23.255	263.829
Q4/2005	2005-12-31	368.282	7.247	73.788	23.421	263.901		Q4/2005	7.247	73.788	23.421	263.901
Q1/2006	2006-03-31	369.725	7.06	74.307	23.435	265.039		Q1/2006	7.06	74.307	23.435	265.039
Q2/2006	2006-06-30	372.164	7.035	75.556	23.388	266.295		Q2/2006	7.035	75.556	23.388	266.295
Q3/2006	2006-09-30	373.235	7.099	76.099	23.268	266.857		Q3/2006	7.099	76.099	23.268	266.857
Q4/2006	2006-12-31	377.858	7.212	77.372	24.477	268.944		Q4/2006	7.212	77.372	24.477	268.944
Q1/2007	2007-03-31	378.57	7.18	77.05	24.2	270.274		Q1/2007	7.18	77.05	24.2	270.274
Q2/2007	2007-06-30	378.299	7.159	76.889	23.702	270.655		Q2/2007	7.159	76.889	23.702	270.655
Q3/2007	2007-09-30	378.648	7.049	77.892	23.322	270.485		Q3/2007	7.049	77.892	23.322	270.485
Q4/2007	2007-12-31	378.487	7.064	76.938	23.146	271.424		Q4/2007	7.064	76.938	23.146	271.424
Q1/2008	2008-03-31	382.496	7.172	78.895	23.888	272.647		Q1/2008	7.172	78.895	23.888	272.647
Q2/2008	2008-06-30	379.205	7.283	77.786	23.101	271.098		Q2/2008	7.283	77.786	23.101	271.098
Q3/2008	2008-09-30	374.122	7.149	74.828	22.759	269.466		Q3/2008	7.149	74.828	22.759	269.466
Q4/2008	2008-12-31	365.414	7.179	69.698	21.765	266.827		Q4/2008	7.179	69.698	21.765	266.827
Q1/2009	2009-03-31	355.136	7.08	63.759	21.588	262.783		Q1/2009	7.08	63.759	21.588	262.783
Q2/2009	2009-06-30	352.28	7.038	61.823	21.319	262.176		Q2/2009	7.038	61.823	21.319	262.176
Q3/2009	2009-09-30	354.324	7.131	62.87	20.716	263.669		Q3/2009	7.131	62.87	20.716	263.669
Q4/2009	2009-12-31	355.794	7.066	64.566	20.596	263.629		Q4/2009	7.066	64.566	20.596	263.629
Q1/2010	2010-03-31	357.147	7.11	65.581	20.38	264.104		Q1/2010	7.11	65.581	20.38	264.104
Q2/2010	2010-06-30	359.256	7.056	67.084	20.376	264.738		Q2/2010	7.056	67.084	20.376	264.738
Q3/2010	2010-09-30	361.346	7.068	67.967	20.241	266.058		Q3/2010	7.068	67.967	20.241	266.058
Q4/2010	2010-12-31	363.771	7.183	68.671	20.002	267.901		Q4/2010	7.183	68.671	20.002	267.901
Q1/2011	2011-03-31	364.457	7.169	68.857	19.827	268.604		Q1/2011	7.169	68.857	19.827	268.604
Q2/2011	2011-06-30	364.813	7.121	69.083	19.318	269.291		Q2/2011	7.121	69.083	19.318	269.291
Q3/2011	2011-09-30	362.799	7.247	68.483	19.041	268.029		Q3/2011	7.247	68.483	19.041	268.029
Q4/2011	2011-12-31	360.125	7.423	67.561	18.933	266.207		Q4/2011	7.423	67.561	18.933	266.207
Q1/2012	2012-03-31	357.514	7.1	67.363	18.456	264.625		Q1/2012	7.1	67.363	18.456	264.625
Q2/2012	2012-06-30	354.439	7.206	66.768	17.907	262.599		Q2/2012	7.206	66.768	17.907	262.599
Q3/2012	2012-09-30	352.984	6.913	67.009	17.723	261.405		Q3/2012	6.913	67.009	17.723	261.405
Q4/2012	2012-12-31	351.15	6.99	65.419	17.544	261.25		Q4/2012	6.99	65.419	17.544	261.25
Q1/2013	2013-03-31	348.112	7.203	65.142	17.083	258.733		Q1/2013	7.203	65.142	17.083	258.733
Q2/2013	2013-06-30	348.125	7.124	65.079	17.151	258.821		Q2/2013	7.124	65.079	17.151	258.821
Q3/2013	2013-09-30	349.505	7.079	65.177	17.1	260.214		Q3/2013	7.079	65.177	17.1	260.214
Q4/2013	2013-12-31	348.908	7.198	64.917	16.662	260.206		Q4/2013	7.198	64.917	16.662	260.206
Q1/2014	2014-03-31	349.742	7.039	65.503	16.437	260.88		Q1/2014	7.039	65.503	16.437	260.88
Q2/2014	2014-06-30	349.266	7.006	65.176	16.123	261.099		Q2/2014	7.006	65.176	16.123	261.099
Q3/2014	2014-09-30	350.178	7.087	64.913	15.881	262.443		Q3/2014	7.087	64.913	15.881	262.443
Q4/2014	2014-12-31	349.874	6.808	64.869	15.844	262.54		Q4/2014	6.808	64.869	15.844	262.54
Q1/2015	2015-03-31	350.531	7.122	64.896	15.87	262.795		Q1/2015	7.122	64.896	15.87	262.795
Q2/2015	2015-06-30	351.778	7.174	65.583	15.845	263.329		Q2/2015	7.174	65.583	15.845	263.329
Q3/2015	2015-09-30	352.886	7.355	65.712	15.836	264.127		Q3/2015	7.355	65.712	15.836	264.127
Q4/2015	2015-12-31	354.112	7.571	65.703	15.969	264.993		Q4/2015	7.571	65.703	15.969	264.993
Q1/2016	2016-03-31	355.339	7.324	66.885	16.009	265.255		Q1/2016	7.324	66.885	16.009	265.255
Q2/2016	2016-06-30	355.968	7.369	66.504	15.983	266.254		Q2/2016	7.369	66.504	15.983	266.254
Q3/2016	2016-09-30	357.114	7.4	67.187	15.95	266.718		Q3/2016	7.4	67.187	15.95	266.718
Q4/2016	2016-12-31	358.73	7.189	68.178	16.016	267.498		Q4/2016	7.189	68.178	16.016	267.498
Q1/2017	2017-03-31	360.647	7.178	68.495	16.146	268.96		Q1/2017	7.178	68.495	16.146	268.96
Q2/2017	2017-06-30	361.734	7.03	69.436	16.081	269.31		Q2/2017	7.03	69.436	16.081	269.31
Q3/2017	2017-09-30	362.99	6.917	70.468	16.205	269.496		Q3/2017	6.917	70.468	16.205	269.496
Q4/2017	2017-12-31	364.192	6.885	70.993	16.331	270.068		Q4/2017	6.885	70.993	16.331	270.068
Q1/2018	2018-03-31	365.202	7.156	70.748	16.332	271.057
Q2/2018	2018-06-30	366.015	7.054	70.755	16.417	271.893

## Sheet: Canada (Quarterly)
Q1/1960 !Q mag=bil	.excel_last	S156GACH@G10	S156GQCH@G10	S156GECH@G10	S156GMCH@G10	S156GOCH@G10	S156GYCH@G10		S156GAC@G1008	S156GQC@G1008	S156GMC@G1008	S156GCOC@G1008	S156GTOC@G1008	S156GCC@G1008	S156GWC@G1008	S156GRC@G1008	S156GFIC@G1008	S156GGC@G1008	S156GDC@G1008	S156GHSC@G1008	S156GHC@G1008	S156GSOC@G1008	S156GREC@G1008	S156GAEC@G1008	S156GPC@G1008	s156gadc@g1008
.DESC		Canada: GDP at Basic Prices: Agric/Forestry/Fishing/Hunting(SA, Bil.Chn.07.C$)	Canada: GDP at Basic Prices: Mining & Oil & Gas Extraction(SA, Bil.Chn.07.C$)	Canada: GDP at Basic Prices: Utilities(SA, Bil.Chn.2007.C$)	Canada: GDP at Basic Prices: Manufacturing(SA, Bil.Chn.2007.C$)	Canada: GDP at Basic Prices: Construction(SA, Bil.Chn.2007.C$)	Canada: GDP at Basic Prices: Service-producing Industries(SA, Bil.Chn.2007.C$)		Canada: GDP at Basic Prices: Agric/Forestry/Fishing/Hunting(SAAR, Bil.2002.C$)	Canada: GDP at Basic Prices: Mining & Oil & Gas Extraction(SAAR, Bil.2002.C$)	Canada: GDP at Basic Prices: Manufacturing(SAAR, Bil.2002.C$)	Canada: GDP at Basic Prices: Construction(SAAR, Bil.2002.C$)	Canada: GDP at Basic Prices: Transportation and Storage(SAAR, Bil.2002.C$)	Canada: GDP at Basic Prices: Information and Cultural Inds(SAAR, Bil.2002.C$)	Canada: GDP at Basic Prices: Wholesale Trade(SAAR, Bil.2002.C$)	Canada: GDP at Basic Prices: Retail Trade(SAAR, Bil.2002.C$)	Canada: GDP at Basic Prices: Finance and Insurance(SAAR, Bil.2002.C$)	Canada: GDP at Basic Prices: Public Administration(SAAR, Bil.2002.C$)	Canada: GDP at Basic Prices: Educational Services(SAAR, Bil.2002.C$)	Canada: GDP at Basic Prices: Health Care & Social Assistance(SAAR, Bil.2002.C$)	Canada: GDP at Basic Prices: Accommodation and Food Services(SAAR, Bil.2002.C$)	Canada: GDP at Basic Prices: Other Svcs {except Public Admin}(SAAR, Bil.2002.C$)	Canada: GDP at Basic Prices: Real Estate & Rental & Leasing(SAAR, Bil.2002.C$)	Canada: GDP at Basic Prices: Arts, Entertainment/Recreation(SAAR, Bil.2002.C$)	Canada: GDP at Basic Prices: Professional/Scientific/Tech Svcs(SAAR, Bil.2002C$)	Can: GDP/Basic Pr: Admin/Support/Waste Mgt & Remediation Svc(SAAR, Bil.2002.C$)
.T1		Q1-1997	Q1-1997	Q1-1997	Q1-1997	Q1-1997	Q1-1997		Q1-1981	Q1-1981	Q1-1981	Q1-1981	Q1-1981	Q1-1981	Q1-1981	Q1-1981	Q1-1997	Q1-1981	Q1-1981	Q1-1981	Q1-1981	Q1-1981	Q1-1997	Q1-1981	Q1-1981	Q1-1981
.TN		Q2-2018	Q2-2018	Q2-2018	Q2-2018	Q2-2018	Q2-2018		Q3-2007	Q3-2007	Q3-2007	Q3-2007	Q3-2007	Q3-2007	Q3-2007	Q3-2007	Q3-2007	Q3-2007	Q3-2007	Q3-2007	Q3-2007	Q3-2007	Q3-2007	Q3-2007	Q3-2007	Q3-2007
.LSOURCE		Statistics Canada	Statistics Canada	Statistics Canada	Statistics Canada	Statistics Canada	Statistics Canada		Statistics Canada	Statistics Canada	Statistics Canada	Statistics Canada	Statistics Canada	Statistics Canada	Statistics Canada	Statistics Canada	Statistics Canada	Statistics Canada	Statistics Canada	Statistics Canada	Statistics Canada	Statistics Canada	Statistics Canada	Statistics Canada	Statistics Canada	Statistics Canada		HISTORICAL SERIES GROWTH RATE						FINAL SERIES
.DTLM		Sep-28-2018 07:31	Sep-28-2018 07:31	Sep-28-2018 07:31	Sep-28-2018 07:31	Sep-28-2018 07:31	Sep-28-2018 07:31		Jan-31-2008 07:36	Jan-31-2008 07:36	Jan-31-2008 07:36	Jan-31-2008 07:36	Jan-31-2008 07:36	Jan-31-2008 07:36	Jan-31-2008 07:36	Jan-31-2008 07:36	Jan-31-2008 07:36	Jan-31-2008 07:36	Jan-31-2008 07:36	Jan-31-2008 07:36	Jan-31-2008 07:36	Jan-31-2008 07:36	Jan-31-2008 07:36	Jan-31-2008 07:36	Jan-31-2008 07:36	Jan-31-2008 07:36		PRIMARY	SECONDARY	CONSTRUCTION	TERTIARY			PRIMARY	SECONDARY	CONSTRUCTION	TERTIARY
Q1/1960	1960-03-31	#N/A	#N/A	#N/A	#N/A	#N/A	#N/A		#N/A	#N/A	#N/A	#N/A	#N/A	#N/A	#N/A	#N/A	#N/A	#N/A	#N/A	#N/A	#N/A	#N/A	#N/A	#N/A	#N/A	#N/A		#N/A	#N/A	#N/A	#N/A		Q1/1960	#N/A	#N/A	#N/A	#N/A
Q2/1960	1960-06-30	#N/A	#N/A	#N/A	#N/A	#N/A	#N/A		#N/A	#N/A	#N/A	#N/A	#N/A	#N/A	#N/A	#N/A	#N/A	#N/A	#N/A	#N/A	#N/A	#N/A	#N/A	#N/A	#N/A	#N/A		#N/A	#N/A	#N/A	#N/A		Q2/1960	#N/A	#N/A	#N/A	#N/A
Q3/1960	1960-09-30	#N/A	#N/A	#N/A	#N/A	#N/A	#N/A		#N/A	#N/A	#N/A	#N/A	#N/A	#N/A	#N/A	#N/A	#N/A	#N/A	#N/A	#N/A	#N/A	#N/A	#N/A	#N/A	#N/A	#N/A		#N/A	#N/A	#N/A	#N/A		Q3/1960	#N/A	#N/A	#N/A	#N/A
Q4/1960	1960-12-31	#N/A	#N/A	#N/A	#N/A	#N/A	#N/A		#N/A	#N/A	#N/A	#N/A	#N/A	#N/A	#N/A	#N/A	#N/A	#N/A	#N/A	#N/A	#N/A	#N/A	#N/A	#N/A	#N/A	#N/A		#N/A	#N/A	#N/A	#N/A		Q4/1960	#N/A	#N/A	#N/A	#N/A
Q1/1961	1961-03-31	#N/A	#N/A	#N/A	#N/A	#N/A	#N/A		#N/A	#N/A	#N/A	#N/A	#N/A	#N/A	#N/A	#N/A	#N/A	#N/A	#N/A	#N/A	#N/A	#N/A	#N/A	#N/A	#N/A	#N/A		#N/A	#N/A	#N/A	#N/A		Q1/1961	#N/A	#N/A	#N/A	#N/A
Q2/1961	1961-06-30	#N/A	#N/A	#N/A	#N/A	#N/A	#N/A		#N/A	#N/A	#N/A	#N/A	#N/A	#N/A	#N/A	#N/A	#N/A	#N/A	#N/A	#N/A	#N/A	#N/A	#N/A	#N/A	#N/A	#N/A		#N/A	#N/A	#N/A	#N/A		Q2/1961	#N/A	#N/A	#N/A	#N/A
Q3/1961	1961-09-30	#N/A	#N/A	#N/A	#N/A	#N/A	#N/A		#N/A	#N/A	#N/A	#N/A	#N/A	#N/A	#N/A	#N/A	#N/A	#N/A	#N/A	#N/A	#N/A	#N/A	#N/A	#N/A	#N/A	#N/A		#N/A	#N/A	#N/A	#N/A		Q3/1961	#N/A	#N/A	#N/A	#N/A
Q4/1961	1961-12-31	#N/A	#N/A	#N/A	#N/A	#N/A	#N/A		#N/A	#N/A	#N/A	#N/A	#N/A	#N/A	#N/A	#N/A	#N/A	#N/A	#N/A	#N/A	#N/A	#N/A	#N/A	#N/A	#N/A	#N/A		#N/A	#N/A	#N/A	#N/A		Q4/1961	#N/A	#N/A	#N/A	#N/A
Q1/1962	1962-03-31	#N/A	#N/A	#N/A	#N/A	#N/A	#N/A		#N/A	#N/A	#N/A	#N/A	#N/A	#N/A	#N/A	#N/A	#N/A	#N/A	#N/A	#N/A	#N/A	#N/A	#N/A	#N/A	#N/A	#N/A		#N/A	#N/A	#N/A	#N/A		Q1/1962	#N/A	#N/A	#N/A	#N/A
Q2/1962	1962-06-30	#N/A	#N/A	#N/A	#N/A	#N/A	#N/A		#N/A	#N/A	#N/A	#N/A	#N/A	#N/A	#N/A	#N/A	#N/A	#N/A	#N/A	#N/A	#N/A	#N/A	#N/A	#N/A	#N/A	#N/A		#N/A	#N/A	#N/A	#N/A		Q2/1962	#N/A	#N/A	#N/A	#N/A
Q3/1962	1962-09-30	#N/A	#N/A	#N/A	#N/A	#N/A	#N/A		#N/A	#N/A	#N/A	#N/A	#N/A	#N/A	#N/A	#N/A	#N/A	#N/A	#N/A	#N/A	#N/A	#N/A	#N/A	#N/A	#N/A	#N/A		#N/A	#N/A	#N/A	#N/A		Q3/1962	#N/A	#N/A	#N/A	#N/A
Q4/1962	1962-12-31	#N/A	#N/A	#N/A	#N/A	#N/A	#N/A		#N/A	#N/A	#N/A	#N/A	#N/A	#N/A	#N/A	#N/A	#N/A	#N/A	#N/A	#N/A	#N/A	#N/A	#N/A	#N/A	#N/A	#N/A		#N/A	#N/A	#N/A	#N/A		Q4/1962	#N/A	#N/A	#N/A	#N/A
Q1/1963	1963-03-31	#N/A	#N/A	#N/A	#N/A	#N/A	#N/A		#N/A	#N/A	#N/A	#N/A	#N/A	#N/A	#N/A	#N/A	#N/A	#N/A	#N/A	#N/A	#N/A	#N/A	#N/A	#N/A	#N/A	#N/A		#N/A	#N/A	#N/A	#N/A		Q1/1963	#N/A	#N/A	#N/A	#N/A
Q2/1963	1963-06-30	#N/A	#N/A	#N/A	#N/A	#N/A	#N/A		#N/A	#N/A	#N/A	#N/A	#N/A	#N/A	#N/A	#N/A	#N/A	#N/A	#N/A	#N/A	#N/A	#N/A	#N/A	#N/A	#N/A	#N/A		#N/A	#N/A	#N/A	#N/A		Q2/1963	#N/A	#N/A	#N/A	#N/A
Q3/1963	1963-09-30	#N/A	#N/A	#N/A	#N/A	#N/A	#N/A		#N/A	#N/A	#N/A	#N/A	#N/A	#N/A	#N/A	#N/A	#N/A	#N/A	#N/A	#N/A	#N/A	#N/A	#N/A	#N/A	#N/A	#N/A		#N/A	#N/A	#N/A	#N/A		Q3/1963	#N/A	#N/A	#N/A	#N/A
Q4/1963	1963-12-31	#N/A	#N/A	#N/A	#N/A	#N/A	#N/A		#N/A	#N/A	#N/A	#N/A	#N/A	#N/A	#N/A	#N/A	#N/A	#N/A	#N/A	#N/A	#N/A	#N/A	#N/A	#N/A	#N/A	#N/A		#N/A	#N/A	#N/A	#N/A		Q4/1963	#N/A	#N/A	#N/A	#N/A
Q1/1964	1964-03-31	#N/A	#N/A	#N/A	#N/A	#N/A	#N/A		#N/A	#N/A	#N/A	#N/A	#N/A	#N/A	#N/A	#N/A	#N/A	#N/A	#N/A	#N/A	#N/A	#N/A	#N/A	#N/A	#N/A	#N/A		#N/A	#N/A	#N/A	#N/A		Q1/1964	#N/A	#N/A	#N/A	#N/A
Q2/1964	1964-06-30	#N/A	#N/A	#N/A	#N/A	#N/A	#N/A		#N/A	#N/A	#N/A	#N/A	#N/A	#N/A	#N/A	#N/A	#N/A	#N/A	#N/A	#N/A	#N/A	#N/A	#N/A	#N/A	#N/A	#N/A		#N/A	#N/A	#N/A	#N/A		Q2/1964	#N/A	#N/A	#N/A	#N/A
Q3/1964	1964-09-30	#N/A	#N/A	#N/A	#N/A	#N/A	#N/A		#N/A	#N/A	#N/A	#N/A	#N/A	#N/A	#N/A	#N/A	#N/A	#N/A	#N/A	#N/A	#N/A	#N/A	#N/A	#N/A	#N/A	#N/A		#N/A	#N/A	#N/A	#N/A		Q3/1964	#N/A	#N/A	#N/A	#N/A
Q4/1964	1964-12-31	#N/A	#N/A	#N/A	#N/A	#N/A	#N/A		#N/A	#N/A	#N/A	#N/A	#N/A	#N/A	#N/A	#N/A	#N/A	#N/A	#N/A	#N/A	#N/A	#N/A	#N/A	#N/A	#N/A	#N/A		#N/A	#N/A	#N/A	#N/A		Q4/1964	#N/A	#N/A	#N/A	#N/A
Q1/1965	1965-03-31	#N/A	#N/A	#N/A	#N/A	#N/A	#N/A		#N/A	#N/A	#N/A	#N/A	#N/A	#N/A	#N/A	#N/A	#N/A	#N/A	#N/A	#N/A	#N/A	#N/A	#N/A	#N/A	#N/A	#N/A		#N/A	#N/A	#N/A	#N/A		Q1/1965	#N/A	#N/A	#N/A	#N/A
Q2/1965	1965-06-30	#N/A	#N/A	#N/A	#N/A	#N/A	#N/A		#N/A	#N/A	#N/A	#N/A	#N/A	#N/A	#N/A	#N/A	#N/A	#N/A	#N/A	#N/A	#N/A	#N/A	#N/A	#N/A	#N/A	#N/A		#N/A	#N/A	#N/A	#N/A		Q2/1965	#N/A	#N/A	#N/A	#N/A
Q3/1965	1965-09-30	#N/A	#N/A	#N/A	#N/A	#N/A	#N/A		#N/A	#N/A	#N/A	#N/A	#N/A	#N/A	#N/A	#N/A	#N/A	#N/A	#N/A	#N/A	#N/A	#N/A	#N/A	#N/A	#N/A	#N/A		#N/A	#N/A	#N/A	#N/A		Q3/1965	#N/A	#N/A	#N/A	#N/A
Q4/1965	1965-12-31	#N/A	#N/A	#N/A	#N/A	#N/A	#N/A		#N/A	#N/A	#N/A	#N/A	#N/A	#N/A	#N/A	#N/A	#N/A	#N/A	#N/A	#N/A	#N/A	#N/A	#N/A	#N/A	#N/A	#N/A		#N/A	#N/A	#N/A	#N/A		Q4/1965	#N/A	#N/A	#N/A	#N/A
Q1/1966	1966-03-31	#N/A	#N/A	#N/A	#N/A	#N/A	#N/A		#N/A	#N/A	#N/A	#N/A	#N/A	#N/A	#N/A	#N/A	#N/A	#N/A	#N/A	#N/A	#N/A	#N/A	#N/A	#N/A	#N/A	#N/A		#N/A	#N/A	#N/A	#N/A		Q1/1966	#N/A	#N/A	#N/A	#N/A
Q2/1966	1966-06-30	#N/A	#N/A	#N/A	#N/A	#N/A	#N/A		#N/A	#N/A	#N/A	#N/A	#N/A	#N/A	#N/A	#N/A	#N/A	#N/A	#N/A	#N/A	#N/A	#N/A	#N/A	#N/A	#N/A	#N/A		#N/A	#N/A	#N/A	#N/A		Q2/1966	#N/A	#N/A	#N/A	#N/A
Q3/1966	1966-09-30	#N/A	#N/A	#N/A	#N/A	#N/A	#N/A		#N/A	#N/A	#N/A	#N/A	#N/A	#N/A	#N/A	#N/A	#N/A	#N/A	#N/A	#N/A	#N/A	#N/A	#N/A	#N/A	#N/A	#N/A		#N/A	#N/A	#N/A	#N/A		Q3/1966	#N/A	#N/A	#N/A	#N/A
Q4/1966	1966-12-31	#N/A	#N/A	#N/A	#N/A	#N/A	#N/A		#N/A	#N/A	#N/A	#N/A	#N/A	#N/A	#N/A	#N/A	#N/A	#N/A	#N/A	#N/A	#N/A	#N/A	#N/A	#N/A	#N/A	#N/A		#N/A	#N/A	#N/A	#N/A		Q4/1966	#N/A	#N/A	#N/A	#N/A
Q1/1967	1967-03-31	#N/A	#N/A	#N/A	#N/A	#N/A	#N/A		#N/A	#N/A	#N/A	#N/A	#N/A	#N/A	#N/A	#N/A	#N/A	#N/A	#N/A	#N/A	#N/A	#N/A	#N/A	#N/A	#N/A	#N/A		#N/A	#N/A	#N/A	#N/A		Q1/1967	#N/A	#N/A	#N/A	#N/A
Q2/1967	1967-06-30	#N/A	#N/A	#N/A	#N/A	#N/A	#N/A		#N/A	#N/A	#N/A	#N/A	#N/A	#N/A	#N/A	#N/A	#N/A	#N/A	#N/A	#N/A	#N/A	#N/A	#N/A	#N/A	#N/A	#N/A		#N/A	#N/A	#N/A	#N/A		Q2/1967	#N/A	#N/A	#N/A	#N/A
Q3/1967	1967-09-30	#N/A	#N/A	#N/A	#N/A	#N/A	#N/A		#N/A	#N/A	#N/A	#N/A	#N/A	#N/A	#N/A	#N/A	#N/A	#N/A	#N/A	#N/A	#N/A	#N/A	#N/A	#N/A	#N/A	#N/A		#N/A	#N/A	#N/A	#N/A		Q3/1967	#N/A	#N/A	#N/A	#N/A
Q4/1967	1967-12-31	#N/A	#N/A	#N/A	#N/A	#N/A	#N/A		#N/A	#N/A	#N/A	#N/A	#N/A	#N/A	#N/A	#N/A	#N/A	#N/A	#N/A	#N/A	#N/A	#N/A	#N/A	#N/A	#N/A	#N/A		#N/A	#N/A	#N/A	#N/A		Q4/1967	#N/A	#N/A	#N/A	#N/A
Q1/1968	1968-03-31	#N/A	#N/A	#N/A	#N/A	#N/A	#N/A		#N/A	#N/A	#N/A	#N/A	#N/A	#N/A	#N/A	#N/A	#N/A	#N/A	#N/A	#N/A	#N/A	#N/A	#N/A	#N/A	#N/A	#N/A		#N/A	#N/A	#N/A	#N/A		Q1/1968	#N/A	#N/A	#N/A	#N/A
Q2/1968	1968-06-30	#N/A	#N/A	#N/A	#N/A	#N/A	#N/A		#N/A	#N/A	#N/A	#N/A	#N/A	#N/A	#N/A	#N/A	#N/A	#N/A	#N/A	#N/A	#N/A	#N/A	#N/A	#N/A	#N/A	#N/A		#N/A	#N/A	#N/A	#N/A		Q2/1968	#N/A	#N/A	#N/A	#N/A
Q3/1968	1968-09-30	#N/A	#N/A	#N/A	#N/A	#N/A	#N/A		#N/A	#N/A	#N/A	#N/A	#N/A	#N/A	#N/A	#N/A	#N/A	#N/A	#N/A	#N/A	#N/A	#N/A	#N/A	#N/A	#N/A	#N/A		#N/A	#N/A	#N/A	#N/A		Q3/1968	#N/A	#N/A	#N/A	#N/A
Q4/1968	1968-12-31	#N/A	#N/A	#N/A	#N/A	#N/A	#N/A		#N/A	#N/A	#N/A	#N/A	#N/A	#N/A	#N/A	#N/A	#N/A	#N/A	#N/A	#N/A	#N/A	#N/A	#N/A	#N/A	#N/A	#N/A		#N/A	#N/A	#N/A	#N/A		Q4/1968	#N/A	#N/A	#N/A	#N/A
Q1/1969	1969-03-31	#N/A	#N/A	#N/A	#N/A	#N/A	#N/A		#N/A	#N/A	#N/A	#N/A	#N/A	#N/A	#N/A	#N/A	#N/A	#N/A	#N/A	#N/A	#N/A	#N/A	#N/A	#N/A	#N/A	#N/A		#N/A	#N/A	#N/A	#N/A		Q1/1969	#N/A	#N/A	#N/A	#N/A
Q2/1969	1969-06-30	#N/A	#N/A	#N/A	#N/A	#N/A	#N/A		#N/A	#N/A	#N/A	#N/A	#N/A	#N/A	#N/A	#N/A	#N/A	#N/A	#N/A	#N/A	#N/A	#N/A	#N/A	#N/A	#N/A	#N/A		#N/A	#N/A	#N/A	#N/A		Q2/1969	#N/A	#N/A	#N/A	#N/A
Q3/1969	1969-09-30	#N/A	#N/A	#N/A	#N/A	#N/A	#N/A		#N/A	#N/A	#N/A	#N/A	#N/A	#N/A	#N/A	#N/A	#N/A	#N/A	#N/A	#N/A	#N/A	#N/A	#N/A	#N/A	#N/A	#N/A		#N/A	#N/A	#N/A	#N/A		Q3/1969	#N/A	#N/A	#N/A	#N/A
Q4/1969	1969-12-31	#N/A	#N/A	#N/A	#N/A	#N/A	#N/A		#N/A	#N/A	#N/A	#N/A	#N/A	#N/A	#N/A	#N/A	#N/A	#N/A	#N/A	#N/A	#N/A	#N/A	#N/A	#N/A	#N/A	#N/A		#N/A	#N/A	#N/A	#N/A		Q4/1969	#N/A	#N/A	#N/A	#N/A
Q1/1970	1970-03-31	#N/A	#N/A	#N/A	#N/A	#N/A	#N/A		#N/A	#N/A	#N/A	#N/A	#N/A	#N/A	#N/A	#N/A	#N/A	#N/A	#N/A	#N/A	#N/A	#N/A	#N/A	#N/A	#N/A	#N/A		#N/A	#N/A	#N/A	#N/A		Q1/1970	#N/A	#N/A	#N/A	#N/A
Q2/1970	1970-06-30	#N/A	#N/A	#N/A	#N/A	#N/A	#N/A		#N/A	#N/A	#N/A	#N/A	#N/A	#N/A	#N/A	#N/A	#N/A	#N/A	#N/A	#N/A	#N/A	#N/A	#N/A	#N/A	#N/A	#N/A		#N/A	#N/A	#N/A	#N/A		Q2/1970	#N/A	#N/A	#N/A	#N/A
Q3/1970	1970-09-30	#N/A	#N/A	#N/A	#N/A	#N/A	#N/A		#N/A	#N/A	#N/A	#N/A	#N/A	#N/A	#N/A	#N/A	#N/A	#N/A	#N/A	#N/A	#N/A	#N/A	#N/A	#N/A	#N/A	#N/A		#N/A	#N/A	#N/A	#N/A		Q3/1970	#N/A	#N/A	#N/A	#N/A
Q4/1970	1970-12-31	#N/A	#N/A	#N/A	#N/A	#N/A	#N/A		#N/A	#N/A	#N/A	#N/A	#N/A	#N/A	#N/A	#N/A	#N/A	#N/A	#N/A	#N/A	#N/A	#N/A	#N/A	#N/A	#N/A	#N/A		#N/A	#N/A	#N/A	#N/A		Q4/1970	#N/A	#N/A	#N/A	#N/A
Q1/1971	1971-03-31	#N/A	#N/A	#N/A	#N/A	#N/A	#N/A		#N/A	#N/A	#N/A	#N/A	#N/A	#N/A	#N/A	#N/A	#N/A	#N/A	#N/A	#N/A	#N/A	#N/A	#N/A	#N/A	#N/A	#N/A		#N/A	#N/A	#N/A	#N/A		Q1/1971	#N/A	#N/A	#N/A	#N/A
Q2/1971	1971-06-30	#N/A	#N/A	#N/A	#N/A	#N/A	#N/A		#N/A	#N/A	#N/A	#N/A	#N/A	#N/A	#N/A	#N/A	#N/A	#N/A	#N/A	#N/A	#N/A	#N/A	#N/A	#N/A	#N/A	#N/A		#N/A	#N/A	#N/A	#N/A		Q2/1971	#N/A	#N/A	#N/A	#N/A
Q3/1971	1971-09-30	#N/A	#N/A	#N/A	#N/A	#N/A	#N/A		#N/A	#N/A	#N/A	#N/A	#N/A	#N/A	#N/A	#N/A	#N/A	#N/A	#N/A	#N/A	#N/A	#N/A	#N/A	#N/A	#N/A	#N/A		#N/A	#N/A	#N/A	#N/A		Q3/1971	#N/A	#N/A	#N/A	#N/A
Q4/1971	1971-12-31	#N/A	#N/A	#N/A	#N/A	#N/A	#N/A		#N/A	#N/A	#N/A	#N/A	#N/A	#N/A	#N/A	#N/A	#N/A	#N/A	#N/A	#N/A	#N/A	#N/A	#N/A	#N/A	#N/A	#N/A		#N/A	#N/A	#N/A	#N/A		Q4/1971	#N/A	#N/A	#N/A	#N/A
Q1/1972	1972-03-31	#N/A	#N/A	#N/A	#N/A	#N/A	#N/A		#N/A	#N/A	#N/A	#N/A	#N/A	#N/A	#N/A	#N/A	#N/A	#N/A	#N/A	#N/A	#N/A	#N/A	#N/A	#N/A	#N/A	#N/A		#N/A	#N/A	#N/A	#N/A		Q1/1972	#N/A	#N/A	#N/A	#N/A
Q2/1972	1972-06-30	#N/A	#N/A	#N/A	#N/A	#N/A	#N/A		#N/A	#N/A	#N/A	#N/A	#N/A	#N/A	#N/A	#N/A	#N/A	#N/A	#N/A	#N/A	#N/A	#N/A	#N/A	#N/A	#N/A	#N/A		#N/A	#N/A	#N/A	#N/A		Q2/1972	#N/A	#N/A	#N/A	#N/A
Q3/1972	1972-09-30	#N/A	#N/A	#N/A	#N/A	#N/A	#N/A		#N/A	#N/A	#N/A	#N/A	#N/A	#N/A	#N/A	#N/A	#N/A	#N/A	#N/A	#N/A	#N/A	#N/A	#N/A	#N/A	#N/A	#N/A		#N/A	#N/A	#N/A	#N/A		Q3/1972	#N/A	#N/A	#N/A	#N/A
Q4/1972	1972-12-31	#N/A	#N/A	#N/A	#N/A	#N/A	#N/A		#N/A	#N/A	#N/A	#N/A	#N/A	#N/A	#N/A	#N/A	#N/A	#N/A	#N/A	#N/A	#N/A	#N/A	#N/A	#N/A	#N/A	#N/A		#N/A	#N/A	#N/A	#N/A		Q4/1972	#N/A	#N/A	#N/A	#N/A
Q1/1973	1973-03-31	#N/A	#N/A	#N/A	#N/A	#N/A	#N/A		#N/A	#N/A	#N/A	#N/A	#N/A	#N/A	#N/A	#N/A	#N/A	#N/A	#N/A	#N/A	#N/A	#N/A	#N/A	#N/A	#N/A	#N/A		#N/A	#N/A	#N/A	#N/A		Q1/1973	#N/A	#N/A	#N/A	#N/A
Q2/1973	1973-06-30	#N/A	#N/A	#N/A	#N/A	#N/A	#N/A		#N/A	#N/A	#N/A	#N/A	#N/A	#N/A	#N/A	#N/A	#N/A	#N/A	#N/A	#N/A	#N/A	#N/A	#N/A	#N/A	#N/A	#N/A		#N/A	#N/A	#N/A	#N/A		Q2/1973	#N/A	#N/A	#N/A	#N/A
Q3/1973	1973-09-30	#N/A	#N/A	#N/A	#N/A	#N/A	#N/A		#N/A	#N/A	#N/A	#N/A	#N/A	#N/A	#N/A	#N/A	#N/A	#N/A	#N/A	#N/A	#N/A	#N/A	#N/A	#N/A	#N/A	#N/A		#N/A	#N/A	#N/A	#N/A		Q3/1973	#N/A	#N/A	#N/A	#N/A
Q4/1973	1973-12-31	#N/A	#N/A	#N/A	#N/A	#N/A	#N/A		#N/A	#N/A	#N/A	#N/A	#N/A	#N/A	#N/A	#N/A	#N/A	#N/A	#N/A	#N/A	#N/A	#N/A	#N/A	#N/A	#N/A	#N/A		#N/A	#N/A	#N/A	#N/A		Q4/1973	#N/A	#N/A	#N/A	#N/A
Q1/1974	1974-03-31	#N/A	#N/A	#N/A	#N/A	#N/A	#N/A		#N/A	#N/A	#N/A	#N/A	#N/A	#N/A	#N/A	#N/A	#N/A	#N/A	#N/A	#N/A	#N/A	#N/A	#N/A	#N/A	#N/A	#N/A		#N/A	#N/A	#N/A	#N/A		Q1/1974	#N/A	#N/A	#N/A	#N/A
Q2/1974	1974-06-30	#N/A	#N/A	#N/A	#N/A	#N/A	#N/A		#N/A	#N/A	#N/A	#N/A	#N/A	#N/A	#N/A	#N/A	#N/A	#N/A	#N/A	#N/A	#N/A	#N/A	#N/A	#N/A	#N/A	#N/A		#N/A	#N/A	#N/A	#N/A		Q2/1974	#N/A	#N/A	#N/A	#N/A
Q3/1974	1974-09-30	#N/A	#N/A	#N/A	#N/A	#N/A	#N/A		#N/A	#N/A	#N/A	#N/A	#N/A	#N/A	#N/A	#N/A	#N/A	#N/A	#N/A	#N/A	#N/A	#N/A	#N/A	#N/A	#N/A	#N/A		#N/A	#N/A	#N/A	#N/A		Q3/1974	#N/A	#N/A	#N/A	#N/A
Q4/1974	1974-12-31	#N/A	#N/A	#N/A	#N/A	#N/A	#N/A		#N/A	#N/A	#N/A	#N/A	#N/A	#N/A	#N/A	#N/A	#N/A	#N/A	#N/A	#N/A	#N/A	#N/A	#N/A	#N/A	#N/A	#N/A		#N/A	#N/A	#N/A	#N/A		Q4/1974	#N/A	#N/A	#N/A	#N/A
Q1/1975	1975-03-31	#N/A	#N/A	#N/A	#N/A	#N/A	#N/A		#N/A	#N/A	#N/A	#N/A	#N/A	#N/A	#N/A	#N/A	#N/A	#N/A	#N/A	#N/A	#N/A	#N/A	#N/A	#N/A	#N/A	#N/A		#N/A	#N/A	#N/A	#N/A		Q1/1975	#N/A	#N/A	#N/A	#N/A
Q2/1975	1975-06-30	#N/A	#N/A	#N/A	#N/A	#N/A	#N/A		#N/A	#N/A	#N/A	#N/A	#N/A	#N/A	#N/A	#N/A	#N/A	#N/A	#N/A	#N/A	#N/A	#N/A	#N/A	#N/A	#N/A	#N/A		#N/A	#N/A	#N/A	#N/A		Q2/1975	#N/A	#N/A	#N/A	#N/A
Q3/1975	1975-09-30	#N/A	#N/A	#N/A	#N/A	#N/A	#N/A		#N/A	#N/A	#N/A	#N/A	#N/A	#N/A	#N/A	#N/A	#N/A	#N/A	#N/A	#N/A	#N/A	#N/A	#N/A	#N/A	#N/A	#N/A		#N/A	#N/A	#N/A	#N/A		Q3/1975	#N/A	#N/A	#N/A	#N/A
Q4/1975	1975-12-31	#N/A	#N/A	#N/A	#N/A	#N/A	#N/A		#N/A	#N/A	#N/A	#N/A	#N/A	#N/A	#N/A	#N/A	#N/A	#N/A	#N/A	#N/A	#N/A	#N/A	#N/A	#N/A	#N/A	#N/A		#N/A	#N/A	#N/A	#N/A		Q4/1975	#N/A	#N/A	#N/A	#N/A
Q1/1976	1976-03-31	#N/A	#N/A	#N/A	#N/A	#N/A	#N/A		#N/A	#N/A	#N/A	#N/A	#N/A	#N/A	#N/A	#N/A	#N/A	#N/A	#N/A	#N/A	#N/A	#N/A	#N/A	#N/A	#N/A	#N/A		#N/A	#N/A	#N/A	#N/A		Q1/1976	#N/A	#N/A	#N/A	#N/A
Q2/1976	1976-06-30	#N/A	#N/A	#N/A	#N/A	#N/A	#N/A		#N/A	#N/A	#N/A	#N/A	#N/A	#N/A	#N/A	#N/A	#N/A	#N/A	#N/A	#N/A	#N/A	#N/A	#N/A	#N/A	#N/A	#N/A		#N/A	#N/A	#N/A	#N/A		Q2/1976	#N/A	#N/A	#N/A	#N/A
Q3/1976	1976-09-30	#N/A	#N/A	#N/A	#N/A	#N/A	#N/A		#N/A	#N/A	#N/A	#N/A	#N/A	#N/A	#N/A	#N/A	#N/A	#N/A	#N/A	#N/A	#N/A	#N/A	#N/A	#N/A	#N/A	#N/A		#N/A	#N/A	#N/A	#N/A		Q3/1976	#N/A	#N/A	#N/A	#N/A
Q4/1976	1976-12-31	#N/A	#N/A	#N/A	#N/A	#N/A	#N/A		#N/A	#N/A	#N/A	#N/A	#N/A	#N/A	#N/A	#N/A	#N/A	#N/A	#N/A	#N/A	#N/A	#N/A	#N/A	#N/A	#N/A	#N/A		#N/A	#N/A	#N/A	#N/A		Q4/1976	#N/A	#N/A	#N/A	#N/A
Q1/1977	1977-03-31	#N/A	#N/A	#N/A	#N/A	#N/A	#N/A		#N/A	#N/A	#N/A	#N/A	#N/A	#N/A	#N/A	#N/A	#N/A	#N/A	#N/A	#N/A	#N/A	#N/A	#N/A	#N/A	#N/A	#N/A		#N/A	#N/A	#N/A	#N/A		Q1/1977	#N/A	#N/A	#N/A	#N/A
Q2/1977	1977-06-30	#N/A	#N/A	#N/A	#N/A	#N/A	#N/A		#N/A	#N/A	#N/A	#N/A	#N/A	#N/A	#N/A	#N/A	#N/A	#N/A	#N/A	#N/A	#N/A	#N/A	#N/A	#N/A	#N/A	#N/A		#N/A	#N/A	#N/A	#N/A		Q2/1977	#N/A	#N/A	#N/A	#N/A
Q3/1977	1977-09-30	#N/A	#N/A	#N/A	#N/A	#N/A	#N/A		#N/A	#N/A	#N/A	#N/A	#N/A	#N/A	#N/A	#N/A	#N/A	#N/A	#N/A	#N/A	#N/A	#N/A	#N/A	#N/A	#N/A	#N/A		#N/A	#N/A	#N/A	#N/A		Q3/1977	#N/A	#N/A	#N/A	#N/A
Q4/1977	1977-12-31	#N/A	#N/A	#N/A	#N/A	#N/A	#N/A		#N/A	#N/A	#N/A	#N/A	#N/A	#N/A	#N/A	#N/A	#N/A	#N/A	#N/A	#N/A	#N/A	#N/A	#N/A	#N/A	#N/A	#N/A		#N/A	#N/A	#N/A	#N/A		Q4/1977	#N/A	#N/A	#N/A	#N/A
Q1/1978	1978-03-31	#N/A	#N/A	#N/A	#N/A	#N/A	#N/A		#N/A	#N/A	#N/A	#N/A	#N/A	#N/A	#N/A	#N/A	#N/A	#N/A	#N/A	#N/A	#N/A	#N/A	#N/A	#N/A	#N/A	#N/A		#N/A	#N/A	#N/A	#N/A		Q1/1978	#N/A	#N/A	#N/A	#N/A
Q2/1978	1978-06-30	#N/A	#N/A	#N/A	#N/A	#N/A	#N/A		#N/A	#N/A	#N/A	#N/A	#N/A	#N/A	#N/A	#N/A	#N/A	#N/A	#N/A	#N/A	#N/A	#N/A	#N/A	#N/A	#N/A	#N/A		#N/A	#N/A	#N/A	#N/A		Q2/1978	#N/A	#N/A	#N/A	#N/A
Q3/1978	1978-09-30	#N/A	#N/A	#N/A	#N/A	#N/A	#N/A		#N/A	#N/A	#N/A	#N/A	#N/A	#N/A	#N/A	#N/A	#N/A	#N/A	#N/A	#N/A	#N/A	#N/A	#N/A	#N/A	#N/A	#N/A		#N/A	#N/A	#N/A	#N/A		Q3/1978	#N/A	#N/A	#N/A	#N/A
Q4/1978	1978-12-31	#N/A	#N/A	#N/A	#N/A	#N/A	#N/A		#N/A	#N/A	#N/A	#N/A	#N/A	#N/A	#N/A	#N/A	#N/A	#N/A	#N/A	#N/A	#N/A	#N/A	#N/A	#N/A	#N/A	#N/A		#N/A	#N/A	#N/A	#N/A		Q4/1978	#N/A	#N/A	#N/A	#N/A
Q1/1979	1979-03-31	#N/A	#N/A	#N/A	#N/A	#N/A	#N/A		#N/A	#N/A	#N/A	#N/A	#N/A	#N/A	#N/A	#N/A	#N/A	#N/A	#N/A	#N/A	#N/A	#N/A	#N/A	#N/A	#N/A	#N/A		#N/A	#N/A	#N/A	#N/A		Q1/1979	#N/A	#N/A	#N/A	#N/A
Q2/1979	1979-06-30	#N/A	#N/A	#N/A	#N/A	#N/A	#N/A		#N/A	#N/A	#N/A	#N/A	#N/A	#N/A	#N/A	#N/A	#N/A	#N/A	#N/A	#N/A	#N/A	#N/A	#N/A	#N/A	#N/A	#N/A		#N/A	#N/A	#N/A	#N/A		Q2/1979	#N/A	#N/A	#N/A	#N/A
Q3/1979	1979-09-30	#N/A	#N/A	#N/A	#N/A	#N/A	#N/A		#N/A	#N/A	#N/A	#N/A	#N/A	#N/A	#N/A	#N/A	#N/A	#N/A	#N/A	#N/A	#N/A	#N/A	#N/A	#N/A	#N/A	#N/A		#N/A	#N/A	#N/A	#N/A		Q3/1979	#N/A	#N/A	#N/A	#N/A
Q4/1979	1979-12-31	#N/A	#N/A	#N/A	#N/A	#N/A	#N/A		#N/A	#N/A	#N/A	#N/A	#N/A	#N/A	#N/A	#N/A	#N/A	#N/A	#N/A	#N/A	#N/A	#N/A	#N/A	#N/A	#N/A	#N/A		#N/A	#N/A	#N/A	#N/A		Q4/1979	#N/A	#N/A	#N/A	#N/A
Q1/1980	1980-03-31	#N/A	#N/A	#N/A	#N/A	#N/A	#N/A		#N/A	#N/A	#N/A	#N/A	#N/A	#N/A	#N/A	#N/A	#N/A	#N/A	#N/A	#N/A	#N/A	#N/A	#N/A	#N/A	#N/A	#N/A		#N/A	#N/A	#N/A	#N/A		Q1/1980	#N/A	#N/A	#N/A	#N/A
Q2/1980	1980-06-30	#N/A	#N/A	#N/A	#N/A	#N/A	#N/A		#N/A	#N/A	#N/A	#N/A	#N/A	#N/A	#N/A	#N/A	#N/A	#N/A	#N/A	#N/A	#N/A	#N/A	#N/A	#N/A	#N/A	#N/A		#N/A	#N/A	#N/A	#N/A		Q2/1980	#N/A	#N/A	#N/A	#N/A
Q3/1980	1980-09-30	#N/A	#N/A	#N/A	#N/A	#N/A	#N/A		#N/A	#N/A	#N/A	#N/A	#N/A	#N/A	#N/A	#N/A	#N/A	#N/A	#N/A	#N/A	#N/A	#N/A	#N/A	#N/A	#N/A	#N/A		#N/A	#N/A	#N/A	#N/A		Q3/1980	#N/A	#N/A	#N/A	#N/A
Q4/1980	1980-12-31	#N/A	#N/A	#N/A	#N/A	#N/A	#N/A		#N/A	#N/A	#N/A	#N/A	#N/A	#N/A	#N/A	#N/A	#N/A	#N/A	#N/A	#N/A	#N/A	#N/A	#N/A	#N/A	#N/A	#N/A		#N/A	#N/A	#N/A	#N/A		Q4/1980	#N/A	#N/A	#N/A	#N/A
Q1/1981	1981-03-31	#N/A	#N/A	#N/A	#N/A	#N/A	#N/A		20.944	31.9937	102.633	42.819	27.1647	12.5747	19.075	34.2137	#N/A	43.5753	42.8603	44.6197	20.946	12.939	#N/A	6.76967	14.856	10.4247		-0.00431309	0.00865108	0.0180839	0.0057663		Q1/1981	3.99854	49.6632	15.0811	120.153
Q2/1981	1981-06-30	#N/A	#N/A	#N/A	#N/A	#N/A	#N/A		20.8537	31.7107	104.081	43.5933	27.3703	12.9997	19.098	33.7727	#N/A	43.628	43.1093	45.0797	20.9903	13.1037	#N/A	6.75133	15.4727	10.3153		-0.0178865	-0.0223014	0.0199954	-0.00656517		Q2/1981	3.9813	50.0928	15.3538	120.846
Q3/1981	1981-09-30	#N/A	#N/A	#N/A	#N/A	#N/A	#N/A		20.4807	31.829	100.934	44.465	26.585	13.0857	18.9337	33.0927	#N/A	44.0343	42.3203	45.4577	20.382	13.1927	#N/A	6.71967	15.5433	10.429		0.0456854	-0.0267795	0.00095206	0.00615763		Q3/1981	3.91009	48.9757	15.6608	120.052
Q4/1981	1981-12-31	#N/A	#N/A	#N/A	#N/A	#N/A	#N/A		21.4163	31.352	97.8557	44.5073	27.8047	13.1417	18.418	33.146	#N/A	44.3047	42.7123	46.0223	19.9277	13.1837	#N/A	6.64667	15.6367	10.616		-0.0227241	-0.0195525	0.00075643	-0.00459024		Q4/1981	4.08872	47.6642	15.6757	120.791
Q1/1982	1982-03-31	#N/A	#N/A	#N/A	#N/A	#N/A	#N/A		20.9297	31.446	95.2353	44.541	26.8337	13.026	18.0173	32.7673	#N/A	44.4793	42.9803	46.0607	19.474	13.028	#N/A	6.63767	16.3243	10.5933		0.0216598	-0.0360064	-0.00712452	-0.00371325		Q1/1982	3.99581	46.7322	15.6876	120.237
Q2/1982	1982-06-30	#N/A	#N/A	#N/A	#N/A	#N/A	#N/A		21.383	31.046	91.074	44.2237	26.3143	12.8547	17.3947	32.8413	#N/A	44.7283	42.768	46.1803	19.1743	13.095	#N/A	6.701	16.7497	10.3427		-0.00793465	-0.0227645	-0.0374988	-0.00265727		Q2/1982	4.08236	45.0495	15.5758	119.79
Q3/1982	1982-09-30	#N/A	#N/A	#N/A	#N/A	#N/A	#N/A		21.2133	30.8987	88.4413	42.5653	26.0567	12.7947	17.2763	32.6063	#N/A	44.7633	42.6387	46.621	18.8437	13.1123	#N/A	6.89267	16.5417	10.2287		0.00732244	-0.0121753	-0.0269468	-0.00629965		Q3/1982	4.04996	44.024	14.9918	119.472
Q4/1982	1982-12-31	#N/A	#N/A	#N/A	#N/A	#N/A	#N/A		21.3687	31.4757	86.4113	41.4183	25.0173	12.7207	17.2037	32.7423	#N/A	44.9557	43.7097	46.8077	18.1033	12.948	#N/A	6.48233	15.996	9.87267		-0.0174555	0.0232652	0.0310571	0.00922904		Q4/1982	4.07962	43.488	14.5878	118.72
Q1/1983	1983-03-31	#N/A	#N/A	#N/A	#N/A	#N/A	#N/A		20.9957	30.94	89.6897	42.7047	26.1083	12.9923	18.086	32.351	#N/A	45.2133	43.8667	47.564	18.2223	12.948	#N/A	6.25467	15.4417	10.1557		0.0438821	0.0338446	0.0131836	0.0136005		Q1/1983	4.00841	44.4998	15.0408	119.815
Q2/1983	1983-06-30	#N/A	#N/A	#N/A	#N/A	#N/A	#N/A		21.917	31.664	93.0483	43.2677	27.16	13.2683	18.8497	32.8247	#N/A	45.3267	44.051	47.746	18.7073	13.166	#N/A	6.55533	15.313	10.1693		-0.0202735	0.0492119	-0.0256234	0.00888093		Q2/1983	4.1843	46.0058	15.2391	121.445
Q3/1983	1983-09-30	#N/A	#N/A	#N/A	#N/A	#N/A	#N/A		21.4727	34.213	96.6367	42.159	28.0747	13.339	19.5867	33.3893	#N/A	45.2573	44.282	47.559	18.6673	13.3883	#N/A	6.65567	15.3037	10.2377		-0.0512434	0.0340187	-0.00933767	0.00229593		Q3/1983	4.09947	48.2699	14.8486	122.523
Q4/1983	1983-12-31	#N/A	#N/A	#N/A	#N/A	#N/A	#N/A		20.3723	34.3837	100.917	41.7653	28.2293	13.4137	19.7013	33.7273	#N/A	45.3397	44.4757	47.0327	18.3147	13.713	#N/A	6.74667	15.2553	10.4703		0.0106517	0.0245576	-0.0232011	0.0220869		Q4/1983	3.8894	49.912	14.71	122.805
Q1/1984	1984-03-31	#N/A	#N/A	#N/A	#N/A	#N/A	#N/A		20.5893	35.0607	103.563	40.7963	29.0063	13.5403	20.0337	35.718	#N/A	45.8987	45.2743	48.6983	18.5133	13.6593	#N/A	6.11833	15.7253	10.7807		0.0117051	0.0465144	-0.016374	0.0167202		Q1/1984	3.93083	51.1377	14.3687	125.517
Q2/1984	1984-06-30	#N/A	#N/A	#N/A	#N/A	#N/A	#N/A		20.8303	37.4447	107.627	40.1283	30.0117	13.7827	20.3697	36.373	#N/A	46.2133	45.3663	48.694	18.8173	14.0063	#N/A	6.45967	16.8207	11.1177		0.0117937	0.015868	0.0163309	0.00633916		Q2/1984	3.97684	53.5163	14.1334	127.616
Q3/1984	1984-09-30	#N/A	#N/A	#N/A	#N/A	#N/A	#N/A		21.076	37.492	109.882	40.7837	30.4197	13.943	20.58	36.245	#N/A	46.5063	45.496	48.6603	18.8617	14.2287	#N/A	6.61467	17.0337	11.396		-0.00830328	0.00409843	-0.0103718	0.0138394		Q3/1984	4.02374	54.3655	14.3642	128.425
Q4/1984	1984-12-31	#N/A	#N/A	#N/A	#N/A	#N/A	#N/A		20.901	37.727	110.251	40.3607	30.5827	14.2117	21.374	36.719	#N/A	46.6063	45.6713	48.7753	19.2803	14.5847	#N/A	7.184	17.5613	11.7243		0	0.0153492	0.0266266	0.0124286		Q4/1984	3.99033	54.5883	14.2153	130.202
Q1/1985	1985-03-31	#N/A	#N/A	#N/A	#N/A	#N/A	#N/A		20.901	39.293	110.956	41.4353	31.3383	14.346	21.8513	36.9993	#N/A	46.4277	46.7513	50.226	19.6547	15.051	#N/A	6.44633	17.0823	12.0067		0.0108607	0.00770721	0.0146011	0.00287572		Q1/1985	3.99033	55.4262	14.5938	131.82
Q2/1985	1985-06-30	#N/A	#N/A	#N/A	#N/A	#N/A	#N/A		21.128	39.1987	112.208	42.0403	31.1923	14.372	22.4623	37.646	#N/A	46.5763	46.8067	50.245	19.5317	15.06	#N/A	6.40967	16.5547	12.2393		0.0145305	0.00715291	0.0284806	0.00893984		Q2/1985	4.03367	55.8534	14.8068	132.199
Q3/1985	1985-09-30	#N/A	#N/A	#N/A	#N/A	#N/A	#N/A		21.435	38.0097	114.48	43.2377	31.201	14.5507	23.2223	38.2683	#N/A	46.886	46.8993	50.4367	19.2977	15.238	#N/A	6.86067	16.4927	12.5953		0.0846435	0.0090148	0.0350389	0.0288462		Q3/1985	4.09228	56.2529	15.2286	133.381
Q4/1985	1985-12-31	#N/A	#N/A	#N/A	#N/A	#N/A	#N/A		23.2493	38.522	115.343	44.7527	32.1327	14.7857	24.1423	42.6897	#N/A	47.3313	46.7973	50.9107	19.844	15.5003	#N/A	7.066	17.1623	12.8733		-0.0424672	0.000972716	0.0657019	-0.00367613		Q4/1985	4.43867	56.76	15.7621	137.229
Q1/1986	1986-03-31	#N/A	#N/A	#N/A	#N/A	#N/A	#N/A		22.262	38.6337	115.381	47.693	31.7337	15.33	24.681	39.5703	#N/A	47.7727	47.342	52.155	19.4433	15.109	#N/A	6.232	17.0913	13.5577		0.050295	-0.0221408	-0.0621894	0.0106206		Q1/1986	4.25017	56.8152	16.7977	136.724
Q2/1986	1986-06-30	#N/A	#N/A	#N/A	#N/A	#N/A	#N/A		23.3817	35.767	114.837	44.727	31.652	15.2483	25.0057	40.1063	#N/A	47.8993	47.393	52.323	19.6327	15.3317	#N/A	7.38467	17.7743	13.772		0.0422126	-0.00986027	-0.0370768	0.0079115		Q2/1986	4.46393	55.5573	15.7531	138.176
Q3/1986	1986-09-30	#N/A	#N/A	#N/A	#N/A	#N/A	#N/A		24.3687	35.5137	113.606	43.0687	31.729	15.2443	25.5173	40.9757	#N/A	47.908	47.4943	52.313	19.6063	15.5623	#N/A	7.53967	18.395	13.8767		-0.0374114	0.00687369	-0.0129715	0.000174519		Q3/1986	4.65237	55.0095	15.169	139.269
Q4/1986	1986-12-31	#N/A	#N/A	#N/A	#N/A	#N/A	#N/A		23.457	36.1437	114.001	42.51	31.918	15.1287	25.4943	41.099	#N/A	48.0787	47.5867	52.0593	19.1787	15.6247	#N/A	7.02	19.0913	13.941		-0.0416791	0.0253689	0.0349408	0.011205		Q4/1986	4.47832	55.3876	14.9723	139.294
Q1/1987	1987-03-31	#N/A	#N/A	#N/A	#N/A	#N/A	#N/A		22.4793	36.7087	117.245	43.9953	33.086	15.5053	26.243	41.4743	#N/A	47.93	46.802	53.6777	19.1657	15.2917	#N/A	7.10233	19.6413	14.0683		-0.0260536	0.00321743	0.0636658	0.010818		Q1/1987	4.29166	56.7927	15.4954	140.855
Q2/1987	1987-06-30	#N/A	#N/A	#N/A	#N/A	#N/A	#N/A		21.8937	37.068	117.381	46.7963	33.1033	15.9527	26.6823	42.327	#N/A	47.8907	47.3237	54.0893	19.7473	15.5713	#N/A	6.79233	19.8893	14.2963		0.0153012	0.0308797	0.0297459	0.0140679		Q2/1987	4.17985	56.9755	16.4819	142.378
Q3/1987	1987-09-30	#N/A	#N/A	#N/A	#N/A	#N/A	#N/A		22.2287	39.0813	120.137	48.1883	33.3093	16.5117	27.5797	41.882	#N/A	48.3623	47.665	54.7163	20.3463	15.767	#N/A	7.25233	20.3287	14.7797		0.0497406	0.0297412	0.000525715	0.00793591		Q3/1987	4.24381	58.7348	16.9722	144.381
Q4/1987	1987-12-31	#N/A	#N/A	#N/A	#N/A	#N/A	#N/A		23.3343	40.029	123.924	48.2137	34.0993	16.9183	28.4693	42.261	#N/A	48.585	47.6007	54.7067	20.2273	15.829	#N/A	6.82433	20.7147	15.0303		-0.119666	0.0293539	-0.0213218	0.0153141		Q4/1987	4.4549	60.4817	16.9811	145.527
Q1/1988	1988-03-31	#N/A	#N/A	#N/A	#N/A	#N/A	#N/A		20.542	41.954	126.812	47.1857	35.0227	17.1793	28.748	42.014	#N/A	49.2097	47.0743	55.5113	20.333	16.2517	#N/A	8.232	21.6237	15.4457		0.0777432	0.00660876	0.01362	0.0111633		Q1/1988	3.9218	62.2571	16.6191	147.756
Q2/1988	1988-06-30	#N/A	#N/A	#N/A	#N/A	#N/A	#N/A		22.139	42.101	127.78	47.8283	35.2717	17.4777	29.9167	42.0593	#N/A	49.8517	47.102	55.8657	20.4747	16.3453	#N/A	7.972	22.311	15.979		-0.010675	-0.0044482	0.0131024	0.00779384		Q2/1988	4.22669	62.6685	16.8454	149.405
Q3/1988	1988-09-30	#N/A	#N/A	#N/A	#N/A	#N/A	#N/A		21.9027	41.9653	127.16	48.455	35.2717	17.8503	30.5697	42.6197	#N/A	50.0483	47.1343	56.2823	20.3333	16.603	#N/A	7.931	22.222	16.5717		0.021139	-0.000183296	0.0136209	0.0100008		Q3/1988	4.18157	62.3897	17.0661	150.57
Q4/1988	1988-12-31	#N/A	#N/A	#N/A	#N/A	#N/A	#N/A		22.3657	40.9237	128.171	49.115	35.2417	18.1707	31.387	43.279	#N/A	50.1443	47.591	56.9383	20.9107	16.972	#N/A	7.42567	22.116	16.8957		-0.0120274	0.00510956	0.0250704	0.00744904		Q4/1988	4.26996	62.3783	17.2986	152.075
Q1/1989	1989-03-31	#N/A	#N/A	#N/A	#N/A	#N/A	#N/A		22.0967	39.499	130.46	50.3463	35.4473	18.7	31.5323	43.4687	#N/A	50.6463	46.885	56.8993	21.3953	16.8387	#N/A	8.02233	22.528	17.443		0.0643536	-0.000103947	-0.0107588	0.00318094		Q1/1989	4.21861	62.697	17.7323	153.208
Q2/1989	1989-06-30	#N/A	#N/A	#N/A	#N/A	#N/A	#N/A		23.5187	40.2583	129.683	49.8047	35.0397	18.9427	32.124	43.3613	#N/A	50.546	47.3143	57.3737	21.8537	16.6207	#N/A	7.46667	22.6963	17.6437		0.012444	-0.0105291	0.017582	0.00230289		Q2/1989	4.49009	62.6905	17.5415	153.696
Q3/1989	1989-09-30	#N/A	#N/A	#N/A	#N/A	#N/A	#N/A		23.8113	39.3693	128.782	50.6803	35.761	19.2257	32.3873	42.8913	#N/A	50.865	47.716	57.608	21.585	16.3943	#N/A	7.03367	22.945	17.4247		-0.0152728	0.00398648	0.0254602	0.00104347		Q3/1989	4.54596	62.0304	17.8499	154.049
Q4/1989	1989-12-31	#N/A	#N/A	#N/A	#N/A	#N/A	#N/A		23.4477	39.4873	129.335	51.9707	35.5037	19.457	32.4297	42.3393	#N/A	51.0093	47.4713	57.9437	22.0697	16.381	#N/A	6.97	23.0023	17.648		0.093499	-0.00970845	0.00366232	0.0134318		Q4/1989	4.47653	62.2777	18.3044	154.21
Q1/1990	1990-03-31	#N/A	#N/A	#N/A	#N/A	#N/A	#N/A		25.64	39.2283	127.955	52.161	36.092	19.8187	33.6703	42.706	#N/A	51.568	47.065	58.7573	22.7393	16.603	#N/A	7.435	22.967	17.803		-0.0317083	-0.00107666	-0.00161679	-0.00726888		Q1/1990	4.89508	61.6731	18.3714	156.282
Q2/1990	1990-06-30	#N/A	#N/A	#N/A	#N/A	#N/A	#N/A		24.827	39.3757	127.627	52.0767	35.95	19.968	32.078	41.2473	#N/A	51.7777	47.2867	59.0013	22.3873	16.7497	#N/A	7.35733	22.6167	18.0627		-0.0194009	-0.0161075	-0.0226653	-0.00111799		Q2/1990	4.73987	61.6067	18.3417	155.146
Q3/1990	1990-09-30	#N/A	#N/A	#N/A	#N/A	#N/A	#N/A		24.3453	39.7343	124.579	50.8963	35.2807	20.1057	31.074	40.5717	#N/A	52.232	47.859	59.437	21.9857	16.7363	#N/A	7.56233	22.8697	18.35		0.00232762	-0.0310322	-0.0447249	-0.0054251		Q3/1990	4.64791	60.6144	17.926	154.972
Q4/1990	1990-12-31	#N/A	#N/A	#N/A	#N/A	#N/A	#N/A		24.402	40.1347	119.079	48.62	34.6573	20.076	30.5927	39.591	#N/A	52.6423	48.256	59.7817	20.968	16.8387	#N/A	7.07933	23.0647	18.487		0.0278802	-0.0206535	-0.0312491	-0.0113896		Q4/1990	4.65873	58.7334	17.1242	154.131
Q1/1991	1991-03-31	#N/A	#N/A	#N/A	#N/A	#N/A	#N/A		25.0823	41.7767	114.149	47.1007	33.1163	20.076	29.8217	38.2437	#N/A	53.1797	48.168	60.361	19.4693	16.2163	#N/A	7.626	23.096	18.4233		-0.0273101	0.007324	-0.00889584	0.00972365		Q1/1991	4.78862	57.5203	16.5891	152.376
Q2/1991	1991-06-30	#N/A	#N/A	#N/A	#N/A	#N/A	#N/A		24.3973	40.9823	116.085	46.6817	33.6617	20.3367	31.7687	38.915	#N/A	54.2673	48.5607	60.6437	18.9893	16.1677	#N/A	7.02933	23.1757	17.858		-0.0199339	0.0113751	-0.00189225	-0.00344846		Q2/1991	4.65784	57.9416	16.4416	153.858
Q3/1991	1991-09-30	#N/A	#N/A	#N/A	#N/A	#N/A	#N/A		23.911	40.947	117.907	46.5933	33.2233	20.527	32.2233	38.4783	#N/A	53.7607	48.7497	61.108	18.8263	16.2383	#N/A	6.85633	22.9053	17.1963		0.00808554	-0.00813743	0.0145228	0.0029362		Q3/1991	4.56499	58.6007	16.4104	153.327
Q4/1991	1991-12-31	#N/A	#N/A	#N/A	#N/A	#N/A	#N/A		24.1043	41.6417	115.92	47.27	33.9017	20.721	32.013	38.7177	#N/A	54.4377	49.0867	61.438	18.7517	16.0337	#N/A	6.856	22.5413	16.6813		-0.0499772	0.00987761	-0.0522671	0.00493831		Q4/1991	4.6019	58.1238	16.6488	153.777
Q1/1992	1992-03-31	#N/A	#N/A	#N/A	#N/A	#N/A	#N/A		22.8997	43.1133	116.005	44.7993	35.2203	20.5567	32.288	38.565	#N/A	54.267	49.502	61.4337	18.866	16.234	#N/A	7.184	22.3017	16.5943		-0.0371476	0.00436783	-0.0291894	0.00462719		Q1/1992	4.37191	58.6979	15.7786	154.537
Q2/1992	1992-06-30	#N/A	#N/A	#N/A	#N/A	#N/A	#N/A		22.049	42.0243	117.789	43.4917	35.5253	20.8217	32.9947	38.837	#N/A	54.4813	49.2487	61.649	19.082	16.163	#N/A	7.17933	21.9297	16.827		0.0338791	0.00104289	-0.00174746	0.00349043		Q2/1992	4.20951	58.9543	15.318	155.252
Q3/1992	1992-09-30	#N/A	#N/A	#N/A	#N/A	#N/A	#N/A		22.796	42.3657	117.614	43.4157	35.1387	20.8107	33.3117	39.043	#N/A	54.7653	49.225	62.19	18.941	16.2343	#N/A	7.27067	21.9473	17.169		-0.022811	0.0148915	-0.0308875	0.00433634		Q3/1992	4.35212	59.0158	15.2912	155.794
Q4/1992	1992-12-31	#N/A	#N/A	#N/A	#N/A	#N/A	#N/A		22.276	42.7307	119.631	42.0747	34.851	20.594	33.3117	39.3643	#N/A	54.8613	49.6867	62.3523	19.355	16.3183	#N/A	7.20233	22.342	17.4383		0.0608727	0.0215876	-0.00423057	0.00400871		Q4/1992	4.25284	59.8946	14.8189	156.469
Q1/1993	1993-03-31	#N/A	#N/A	#N/A	#N/A	#N/A	#N/A		23.632	43.9553	121.912	41.8967	35.2243	20.5453	33.159	39.8093	#N/A	54.7913	49.973	62.1947	19.5313	16.545	#N/A	7.03367	22.741	17.6433		0.0191971	0.0146744	-0.00171056	0.00456058		Q1/1993	4.51173	61.1876	14.7562	157.096
Q2/1993	1993-06-30	#N/A	#N/A	#N/A	#N/A	#N/A	#N/A		24.0857	44.644	123.657	41.825	35.6927	20.8103	33.159	40.065	#N/A	54.6297	49.89	61.9503	19.8353	16.741	#N/A	6.961	23.26	17.9263		0.00844209	0.00421863	-7.96972e-06	0.00380044		Q2/1993	4.59834	62.0855	14.731	157.813
Q3/1993	1993-09-30	#N/A	#N/A	#N/A	#N/A	#N/A	#N/A		24.289	43.961	125.05	41.8247	36.294	20.8773	33.8387	40.275	#N/A	54.4903	49.9637	61.6677	19.5623	16.6743	#N/A	6.95167	23.7833	17.99		0.00251142	0.0129755	0.00657507	0.00436141		Q3/1993	4.63716	62.3474	14.7309	158.413
Q4/1993	1993-12-31	#N/A	#N/A	#N/A	#N/A	#N/A	#N/A		24.35	44.9737	126.23	42.0997	36.9123	20.7917	34.633	40.5097	#N/A	54.595	49.9177	61.7013	19.0907	16.741	#N/A	7.31633	23.956	17.8713		-0.0116359	0.00282314	0.00513068	0.0123166		Q4/1993	4.6488	63.1564	14.8277	159.103
Q1/1994	1994-03-31	#N/A	#N/A	#N/A	#N/A	#N/A	#N/A		24.0667	44.149	127.538	42.3157	37.5947	21.0003	35.4427	41.6927	#N/A	54.7827	49.5623	62.0417	19.8883	16.7633	#N/A	7.53033	24.413	18.054		0.0186427	0.0385002	0.0185983	0.0117646		Q1/1994	4.59471	63.3347	14.9038	161.063
Q2/1994	1994-06-30	#N/A	#N/A	#N/A	#N/A	#N/A	#N/A		24.5153	46.1387	132.159	43.1027	38.6423	21.31	36.271	42.1213	#N/A	55.023	50.116	62.233	19.9767	16.8473	#N/A	7.603	24.923	18.273		0.0030865	0.0243918	0.0143301	0.0095312		Q2/1994	4.68037	65.7731	15.181	162.958
Q3/1994	1994-09-30	#N/A	#N/A	#N/A	#N/A	#N/A	#N/A		24.591	47.3457	135.301	43.7203	39.497	21.5487	36.741	42.2733	#N/A	55.1843	50.49	62.3337	20.3113	17.199	#N/A	7.69433	25.242	18.574		-0.00210104	0.0233475	-0.00222627	0.00868404		Q3/1994	4.69481	67.3774	15.3986	164.511
Q4/1994	1994-12-31	#N/A	#N/A	#N/A	#N/A	#N/A	#N/A		24.5393	47.652	139.259	43.623	39.7933	21.832	37.3977	43.65	#N/A	55.2937	50.4717	62.0607	20.5713	17.132	#N/A	7.453	25.601	19.2807		-0.00309707	0.0209084	-0.0189197	0.00339378		Q4/1994	4.68495	68.9505	15.3643	165.94
Q1/1995	1995-03-31	#N/A	#N/A	#N/A	#N/A	#N/A	#N/A		24.4633	48.282	142.537	42.7977	40.2487	21.996	37.2987	43.481	#N/A	55.5383	50.559	62.027	20.439	17.1367	#N/A	7.594	25.814	19.764		0.0100559	-0.0141426	-0.0368712	0.00440163		Q1/1995	4.67044	70.3922	15.0736	166.503
Q2/1995	1995-06-30	#N/A	#N/A	#N/A	#N/A	#N/A	#N/A		24.7093	48.1053	140.015	41.2197	40.223	22.0627	37.073	43.724	#N/A	55.3113	50.522	62.319	20.9063	17.2433	#N/A	7.749	26.4397	20.092		0.00573333	-0.00495074	-0.00646132	0.00478862		Q2/1995	4.71741	69.3967	14.5178	167.236
Q3/1995	1995-09-30	#N/A	#N/A	#N/A	#N/A	#N/A	#N/A		24.851	47.705	139.484	40.9533	40.476	22.1527	36.9053	44.717	#N/A	54.7387	50.536	62.5107	21.166	17.3767	#N/A	7.822	26.7767	20.4207		0.0123536	-0.00181813	0.00980791	-0.000211211		Q3/1995	4.74445	69.0531	14.424	168.037
Q4/1995	1995-12-31	#N/A	#N/A	#N/A	#N/A	#N/A	#N/A		25.158	47.823	139.025	41.355	40.6823	22.4733	36.8177	44.2597	#N/A	54.42	50.6653	62.2477	21.1357	17.4477	#N/A	7.85367	26.6877	20.822		-0.000755227	0.0056677	0.0045057	-0.000928865		Q4/1995	4.80306	68.9275	14.5655	168.001
Q1/1996	1996-03-31	#N/A	#N/A	#N/A	#N/A	#N/A	#N/A		25.139	48.9587	138.949	41.5413	40.8757	22.4467	37.94	44.5317	#N/A	53.5073	50.5223	61.577	20.809	17.461	#N/A	7.91733	26.4617	21.0863		-0.0018696	0.00397359	0.0286221	0.00131067		Q1/1996	4.79944	69.3182	14.6311	167.845
Q2/1996	1996-06-30	#N/A	#N/A	#N/A	#N/A	#N/A	#N/A		25.092	47.54	141.114	42.7303	41.3777	22.4767	38.3413	44.2637	#N/A	53.883	50.407	61.2853	20.9943	17.3633	#N/A	7.73967	26.426	21.109		-0.00114246	0.0181249	0.02891	0.0048447		Q2/1996	4.79046	69.5937	15.0499	168.065
Q3/1996	1996-09-30	#N/A	#N/A	#N/A	#N/A	#N/A	#N/A		25.0633	48.5173	143.556	43.9657	41.9963	22.533	38.8377	44.7953	#N/A	53.7473	50.5687	60.835	21.1487	17.3053	#N/A	7.904	26.8653	21.0957		-0.00263333	0.00229426	0.00153908	0.00863605		Q3/1996	4.78499	70.855	15.485	168.879
Q4/1996	1996-12-31	#N/A	#N/A	#N/A	#N/A	#N/A	#N/A		24.9973	48.9413	143.573	44.0333	42.2497	22.5103	39.17	45.7473	#N/A	53.3803	51.2977	60.8113	21.1443	17.6347	#N/A	8.03133	28.0893	21.0863		-0.0455515	0.0148613	-0.00817562	0.0066123		Q4/1996	4.77239	71.0176	15.5088	170.338
Q1/1997	1997-03-31	4.555	25.246	8.391	38.436	15.382	171.464		23.8587	48.216	147.159	43.6733	42.5207	25.2487	39.5463	42.2617	53.2037	53.967	49.1017	61.0363	21.4917	20.938	108.883	8.24967	32.3337	17.176		0.00734883	0.0161007	0.0313311	0.0100673		Q1/1997	4.555	72.073	15.382	171.464
Q2/1997	1997-06-30	4.589	25.588	8.261	39.091	15.863	173.257		24.034	48.8713	149.649	45.0417	43.3937	26.0393	40.691	42.8807	53.645	54.0843	48.8567	61.594	21.6907	21.2797	108.699	8.41633	33.0893	17.3973		0.00123436	0.0258764	0.0307123	0.0131223		Q2/1997	4.589	72.94	15.863	173.257
Q3/1997	1997-09-30	4.597	26.612	8.064	39.92	16.355	175.419		24.0637	50.8357	152.822	46.425	43.9507	26.494	42.7533	43.6837	54.6607	54.101	49.2053	61.7163	21.636	21.5357	109.26	8.54667	34.1113	17.7357		0.020238	0.0134801	0.00759648	0.00591911		Q3/1997	4.597	74.596	16.355	175.419
Q4/1997	1997-12-31	4.694	27.128	8.175	40.372	16.487	176.654		24.5507	51.838	154.565	46.7777	43.346	26.5263	43.869	45.2783	55.5207	53.9643	48.14	61.746	21.7863	21.5917	109.947	8.52067	34.788	17.8547		0.0411801	0.0110964	0.0068765	0.0094831		Q4/1997	4.694	75.675	16.487	176.654
Q1/1998	1998-03-31	4.907	27.179	8.038	40.969	16.621	178.291		25.5617	51.8757	156.818	47.0993	43.9393	26.896	44.1603	45.6347	55.601	54.0007	48.5967	61.8127	22.67	21.6927	110.663	8.404	36.2597	18.171		-0.0214514	0.000305073	-0.000785574	0.00876021		Q1/1998	4.907	76.186	16.621	178.291
Q2/1998	1998-06-30	4.778	26.773	8.042	41.214	16.607	179.678		25.0133	50.914	157.843	47.0623	43.5493	27.04	45.133	47.071	55.554	54.546	49.0113	61.8557	22.5353	21.776	111.496	8.78633	37.0603	18.33		0.00842217	-0.00475353	-0.0059708	0.0115363		Q2/1998	4.778	76.029	16.607	179.678
Q3/1998	1998-09-30	4.82	26.363	8.24	41.016	16.512	181.72		25.224	50.4853	157.279	46.7813	43.3513	28.0787	45.082	47.1263	56.2273	55.2617	49.3223	62.2243	23.1597	22.0803	112.871	8.78133	38.2223	18.9207		0.0586611	0.0204911	-0.00175996	0.0150672		Q3/1998	4.82	75.619	16.512	181.72
Q4/1998	1998-12-31	5.115	25.792	8.109	42.438	16.482	184.233		26.7037	49.5827	162.439	46.699	45.3723	29.329	45.881	47.417	56.8123	55.6583	49.578	62.5843	23.2057	22.291	114.291	8.66433	39.379	19.4483		0.0312941	0.0203265	0.0204787	0.0145354		Q4/1998	5.115	76.339	16.482	184.233
Q1/1999	1999-03-31	5.199	26.197	8.156	43.16	16.806	186.917		27.5393	50.1587	166.173	47.6553	45.5423	30.3717	47.038	48.6113	56.775	56.0043	49.9053	63.204	23.585	22.6493	116.179	8.81133	40.1853	20.0603		-0.0169939	0.00575043	0.017081	0.0146377		Q1/1999	5.199	77.513	16.806	186.917
Q2/1999	1999-06-30	5.16	25.939	8.186	43.944	17.08	189.53		27.0713	49.4153	168.16	48.4693	46.515	31.1257	47.494	48.461	58.0537	56.3913	50.221	63.7873	23.8293	23.1503	118.05	9.12233	41.156	20.7707		0.0283818	0.0287027	0.0172549	0.0104958		Q2/1999	5.16	78.069	17.08	189.53
Q3/1999	1999-09-30	5.331	26.691	8.368	45.348	17.37	191.707		27.8397	50.8727	172.948	49.3057	47.228	31.81	48.39	48.98	58.6447	56.7197	50.3753	64.05	23.843	23.483	119.18	9.08367	41.8273	21.211		-0.00727978	0.0306436	0.0335053	0.0146593		Q3/1999	5.331	80.407	17.37	191.707
Q4/1999	1999-12-31	5.318	27.285	8.21	46.675	17.973	194.496		27.637	52.046	178.633	50.9577	47.9567	32.1737	49.8027	49.665	59.8027	57.2437	50.5767	64.665	24.0633	23.9953	120.093	9.35433	43.3487	21.5377		-0.00711606	0.0270592	0.0125398	0.00988468		Q4/1999	5.318	82.17	17.973	194.496
Q1/2000	2000-03-31	5.331	27.391	8.267	47.988	18.222	196.977		27.4403	52.102	184.819	51.5967	48.5207	32.873	50.343	50.7083	61.2903	57.065	50.1653	65.3463	23.7123	24.211	120.916	9.60733	44.3447	21.6423		0.0150387	0.0218244	-0.00754571	0.00921383		Q1/2000	5.331	83.646	18.222	196.977
Q2/2000	2000-06-30	5.383	27.644	8.255	49.023	18.101	198.568		27.853	52.721	189.371	51.2073	48.6467	33.6223	50.8353	51.1203	61.289	57.7303	50.4803	65.829	24.369	24.4443	121.694	9.567	45.5273	21.6783		-0.0313551	0.0148718	0.00690656	0.0131472		Q2/2000	5.383	84.922	18.101	198.568
Q3/2000	2000-09-30	5.261	27.141	8.234	49.978	18.231	200.829		26.9797	51.7897	193.903	51.561	49.3687	34.225	51.6487	52.6167	61.488	58.6457	50.6923	66.194	24.9497	24.7483	122.814	9.71433	46.718	21.777		-0.0386464	0.00344062	0.0134339	0.00705397		Q3/2000	5.261	85.353	18.231	200.829
Q4/2000	2000-12-31	5.092	27.243	8.221	50.129	18.491	202.304		25.937	52.119	194.419	52.2537	49.979	34.8187	52.2287	52.7847	61.293	58.949	50.6263	66.4853	25.3263	25.0897	123.75	9.829	47.2807	21.9257		-0.00798088	-0.031557	0.0360039	0.0104341		Q4/2000	5.092	85.593	18.491	202.304
Q1/2001	2001-03-31	5.119	27.106	7.865	48.471	19.15	204.646		25.73	51.9927	186.765	54.135	50.7323	35.467	52.698	53.6567	62.737	59.111	50.8143	66.7883	25.3597	25.647	124.824	10.0247	47.3163	22.2887		-0.0335277	-0.00812958	0.0126536	0.00538985		Q1/2001	5.119	83.442	19.15	204.646
Q2/2001	2001-06-30	4.999	27.387	7.848	47.854	19.406	205.53		24.8673	53.203	183.614	54.82	50.4407	36.201	53.0893	54.646	62.428	59.5053	50.4397	67.0707	24.9553	26.0843	126.347	9.96667	47.388	22.609		-0.0310313	-0.0243282	0.0191597	0.00619191		Q2/2001	4.999	83.089	19.406	205.53
Q3/2001	2001-09-30	4.894	27.181	7.634	46.699	19.771	206.601		24.0957	52.1073	178.948	55.8703	50.153	36.955	54.3303	54.6643	62.4803	59.742	50.804	67.3393	24.689	26.433	127.583	10.18	47.272	22.8253		-0.0193811	-0.0153167	0.0156613	0.00904066		Q3/2001	4.894	81.514	19.771	206.601
Q4/2001	2001-12-31	4.772	27.129	7.713	45.979	20.058	208.552		23.6287	51.712	175.804	56.7453	49.3843	37.6387	53.194	56.955	63.7877	60.5137	50.8987	67.5447	24.8603	26.7183	129.306	10.4317	47.0783	23.4267		-0.0498124	0.0316695	0.00742499	0.00792129		Q4/2001	4.772	80.821	20.058	208.552
Q1/2002	2002-03-31	4.494	27.969	7.875	47.526	20.071	210.545		22.4517	52.664	182.058	57.1667	49.573	37.7547	54.1077	58.1593	63.44	60.6917	50.8827	67.7373	25.203	26.943	130.706	10.372	47.666	24.0603		0.0224037	0.0130623	0.0084898	0.00495973		Q1/2002	4.494	83.37	20.071	210.545
Q2/2002	2002-06-30	4.612	28.397	8.166	48.087	20.343	211.465		22.9547	53.3397	184.448	57.652	50.212	37.8467	54.8443	58.1227	63.0487	61.302	51.104	67.7617	25.6257	27.132	130.785	10.4433	48.0317	24.5447		0.0121834	-0.00281063	0.00608247	0.00862685		Q2/2002	4.612	84.65	20.343	211.465
Q3/2002	2002-09-30	4.681	28.537	8.296	47.98	20.455	213.172		23.2343	53.7153	183.404	58.0027	50.2857	38.334	55.7087	58.3273	63.873	61.7067	51.8297	68.1863	25.5407	27.3767	131.412	10.38	48.72	25.2557		0.0558226	-0.00782728	0.00482736	0.00937694		Q3/2002	4.681	84.813	20.455	213.172
Q4/2002	2002-12-31	4.899	28.699	8.397	47.278	20.664	214.839		24.5313	54.229	181.034	58.2827	50.1973	38.9807	56.2433	59.3227	64.1623	62.3957	52.5557	68.8827	25.2667	27.4683	132.733	10.3967	49.5063	25.5473		0.0392287	-0.00186741	0.00710903	0.00505809		Q4/2002	4.899	84.374	20.664	214.839
Q1/2003	2003-03-31	5.099	29.233	8.469	47.028	20.746	216.188		25.4937	54.7147	180.109	58.697	50.4007	38.8943	57.4233	59.568	63.4317	63.1843	52.719	69.6427	24.9323	27.4677	133.328	10.3543	50.2177	25.7553		0.00410559	-0.0043522	0.00787093	0.00248722		Q1/2003	5.099	84.73	20.746	216.188
Q2/2003	2003-06-30	5.083	28.909	8.274	46.931	20.917	216.886		25.5983	54.1023	179.7	59.159	49.705	38.5863	57.4617	60.3293	64.4037	63.2633	52.6547	70.16	24.6927	27.6157	133.855	10.311	50.5483	25.5413		-0.00308614	0.0106914	0.0117311	0.00496712		Q2/2003	5.083	84.114	20.917	216.886
Q3/2003	2003-09-30	5.036	29.39	8.17	47.1	21.249	218.191		25.5193	55.7573	180.544	59.853	50.0217	38.669	57.0787	61.346	65.1637	63.0113	52.1217	70.546	24.789	27.877	135.423	10.2013	50.911	25.5907		0.0414326	0.015483	0.0212855	0.0114095		Q3/2003	5.036	84.66	21.249	218.191
Q4/2003	2003-12-31	5.208	29.244	7.991	48.272	21.575	220.254		26.5767	55.4337	184.527	61.127	50.9927	38.8663	59.2603	61.2007	66.081	63.673	52.7367	70.8673	25.046	28.1677	136.282	10.5293	51.451	25.9567		0.0205945	-0.00037784	0.0123622	0.00747482		Q4/2003	5.208	85.507	21.575	220.254
Q1/2004	2004-03-31	5.332	29.695	8.111	47.849	21.929	221.937		27.124	56.1237	183.746	61.8827	51.312	39.4073	59.252	62.053	67.412	63.8037	52.8273	71.1773	25.158	28.334	137.166	10.748	51.5897	26.41		0.0274296	0.00997347	0.0110909	0.00987656		Q1/2004	5.332	85.655	21.929	221.937
Q2/2004	2004-06-30	5.501	29.933	8.063	48.084	22.209	224.334		27.868	56.7803	185.482	62.569	52.06	40.1077	59.4547	62.309	68.1087	64.41	53.713	71.3503	25.5517	28.5483	138.31	10.801	52.1843	27.116		0.0328573	0.00293346	0.0178949	0.0101761		Q2/2004	5.501	86.08	22.209	224.334
Q3/2004	2004-09-30	5.668	29.394	8.203	48.395	22.558	226.348		28.7837	55.6657	187.307	63.6887	52.244	40.6607	60.8507	63.0507	68.1287	64.781	54.2733	72.2647	26.0197	28.6967	139.274	11.1047	52.727	27.6213		0.005026	-0.00533805	0.0171302	0.00454117		Q3/2004	5.668	85.992	22.558	226.348
Q4/2004	2004-12-31	5.671	29.332	8.476	48.486	22.852	227.715		28.9283	55.3583	186.317	64.7797	52.424	41.1963	61.8747	63.6793	68.8347	64.2133	54.3623	72.0037	25.9067	28.857	140.334	10.6063	52.943	27.9207		-0.0189664	0.000616529	0.0174489	0.00655727		Q4/2004	5.671	86.294	22.852	227.715
Q1/2005	2005-03-31	5.547	29.024	8.536	48.874	23.165	229.299		28.3797	54.479	187.346	65.91	52.9113	41.448	62.725	64.5913	69.159	64.7017	54.5837	71.8327	26.141	28.9933	141.47	10.627	52.953	28.037		0.0132019	0.00683277	0.0218783	0.00798088		Q1/2005	5.547	86.434	23.165	229.299
Q2/2005	2005-06-30	5.685	29.497	8.635	48.905	23.51	231.398		28.7543	55.5677	187.909	67.352	53.3573	41.738	63.6433	65.095	69.568	64.9473	54.7827	72.2603	26.2893	29.0633	143.081	10.7003	53.5083	28.2863		0.0287609	0.00772558	0.0207715	0.0101814		Q2/2005	5.685	87.037	23.51	231.398
Q3/2005	2005-09-30	5.845	29.839	8.748	48.887	23.638	233.674		29.5813	56.5313	188.827	68.751	54.5773	42.1637	64.4473	64.8123	70.1003	65.313	55.218	73.066	26.5153	29.151	144.484	11.1223	54.3307	28.923		-0.0234157	0.0133451	0.0274614	0.00971321		Q3/2005	5.845	87.474	23.638	233.674
Q4/2005	2005-12-31	5.682	30.659	8.668	49.133	23.866	236.277		28.8887	58.282	190.35	70.639	55.194	42.4023	65.6323	65.8293	70.9967	66.046	55.3437	73.873	26.5743	29.2963	145.514	11.1863	54.484	29.4697		-0.000738467	-0.000967962	0.0260857	0.0127677		Q4/2005	5.682	88.46	23.866	236.277
Q1/2006	2006-03-31	5.696	30.397	8.485	49.74	24.282	239.239		28.8673	57.2893	191.102	72.4817	55.5647	42.7793	67.927	67.6047	72.1423	66.4163	55.963	74.28	27.1743	29.514	146.505	11.2173	54.9553	29.908		-0.00906446	-0.0143966	0.0105912	0.00921751		Q1/2006	5.696	88.622	24.282	239.239
Q2/2006	2006-06-30	5.669	30.54	8.556	48.45	24.424	241.013		28.6057	56.7103	188.105	73.2493	55.8653	43.053	69.1403	68.9453	73.0977	66.906	56.0857	74.6677	27.2237	29.7443	147.564	11.5217	55.1847	30.344		-0.0275353	-0.00915927	0.0100342	0.00507366		Q2/2006	5.669	87.546	24.424	241.013
Q3/2006	2006-09-30	5.552	30.363	8.636	47.781	24.536	242.239		27.818	57.5977	184.976	73.9843	55.7477	43.3707	69.584	69.653	74.4023	66.7033	56.1647	74.8463	27.09	29.9317	148.602	11.2457	55.4673	30.6413		-0.00017974	-0.00831913	0.0158457	0.00602455		Q3/2006	5.552	86.78	24.536	242.239
Q4/2006	2006-12-31	5.498	30.602	8.509	47.211	24.796	244.394		27.813	57.0587	183.497	75.1567	55.8983	43.653	68.6527	69.869	75.3937	66.7783	56.5507	75.338	27.796	30.146	149.856	11.5433	56.0287	30.8467		0.00131833	0.0142947	0.0084091	0.00971548		Q4/2006	5.498	86.322	24.796	244.394
Q1/2007	2007-03-31	5.52	30.97	8.725	47.422	25.145	246.075		27.8497	57.931	186.063	75.7887	56.177	43.9027	69.7387	71.349	76.4747	67.0463	56.785	75.9637	27.609	30.311	151.528	11.6073	56.6467	31.1623		-0.0151169	-0.000366129	0.00772763	0.00988824		Q1/2007	5.52	87.117	25.145	246.075
Q2/2007	2007-06-30	5.378	30.901	8.981	47.409	25.518	248.969		27.4287	57.4857	186.419	76.3743	56.602	44.2223	70.9447	72.978	77.3703	67.431	57.155	76.527	27.316	30.4847	153.055	11.6763	57.2143	31.4957		-0.0138663	-0.00457419	0.0133291	0.00789042		Q2/2007	5.378	87.291	25.518	248.969
Q3/2007	2007-09-30	5.561	31.071	8.954	46.784	25.734	250.846		27.0483	57.8617	184.927	77.3923	57.143	44.3197	72.8817	73.4043	78.0377	67.668	57.3953	76.8617	27.747	30.687	153.915	11.7773	57.4937	31.7253							Q3/2007	5.561	86.809	25.734	250.846
Q4/2007	2007-12-31	5.681	30.163	9.094	46.173	25.699	252.151																										Q4/2007	5.681	85.43	25.699	252.151
Q1/2008	2008-03-31	5.785	30.161	9.307	45.024	26.29	252.831																										Q1/2008	5.785	84.492	26.29	252.831
Q2/2008	2008-06-30	5.954	30.006	9.407	45.233	26.194	253.889																										Q2/2008	5.954	84.646	26.194	253.889
Q3/2008	2008-09-30	6.09	30.617	9.378	44.777	26.257	255.216																										Q3/2008	6.09	84.772	26.257	255.216
Q4/2008	2008-12-31	6.068	29.734	9.196	42.721	26.083	253.733																										Q4/2008	6.068	81.651	26.083	253.733
Q1/2009	2009-03-31	5.882	28.489	9.022	39.258	24.439	252.318																										Q1/2009	5.882	76.769	24.439	252.318
Q2/2009	2009-06-30	5.517	26.348	8.771	37.696	24.107	252.692																										Q2/2009	5.517	72.815	24.107	252.692
Q3/2009	2009-09-30	5.455	26.203	8.718	37.886	24.475	253.822																										Q3/2009	5.455	72.807	24.475	253.822
Q4/2009	2009-12-31	5.535	26.816	8.987	38.404	25.362	255.36																										Q4/2009	5.535	74.207	25.362	255.36
Q1/2010	2010-03-31	5.602	28.291	8.998	39.431	26.257	257.668																										Q1/2010	5.602	76.72	26.257	257.668
Q2/2010	2010-06-30	5.639	29.589	8.84	40.27	26.482	258.268																										Q2/2010	5.639	78.699	26.482	258.268
Q3/2010	2010-09-30	5.686	29.644	8.995	40.562	26.736	259.851																										Q3/2010	5.686	79.201	26.736	259.851
Q4/2010	2010-12-31	5.712	30.807	9.174	40.382	27.002	262.68																										Q4/2010	5.712	80.363	27.002	262.68
Q1/2011	2011-03-31	5.864	30.792	9.351	40.992	27.343	264.854																										Q1/2011	5.864	81.135	27.343	264.854
Q2/2011	2011-06-30	5.9	30.842	9.39	40.977	27.275	265.436																										Q2/2011	5.9	81.209	27.275	265.436
Q3/2011	2011-09-30	5.894	32.549	9.365	41.736	27.818	267.677																										Q3/2011	5.894	83.65	27.818	267.677
Q4/2011	2011-12-31	5.922	32.376	9.112	42.512	28.203	269.367																										Q4/2011	5.922	84	28.203	269.367
Q1/2012	2012-03-31	5.796	31.857	9.021	42.473	29.043	270.476																										Q1/2012	5.796	83.351	29.043	270.476
Q2/2012	2012-06-30	5.833	31.232	9.168	42.558	29.776	271.433																										Q2/2012	5.833	82.958	29.776	271.433
Q3/2012	2012-09-30	5.958	30.09	9.347	42.188	30.031	272.985																										Q3/2012	5.958	81.625	30.031	272.985
Q4/2012	2012-12-31	6.238	30.957	9.314	41.42	30.557	272.665																										Q4/2012	6.238	81.691	30.557	272.665
Q1/2013	2013-03-31	6.717	31.944	9.077	41.827	30.854	274.561																										Q1/2013	6.717	82.848	30.854	274.561
Q2/2013	2013-06-30	7.035	32.099	9.131	41.705	31.068	276.742																										Q2/2013	7.035	82.935	31.068	276.742
Q3/2013	2013-09-30	7.243	32.967	9.199	41.967	31.321	278.751																										Q3/2013	7.243	84.133	31.321	278.751
Q4/2013	2013-12-31	7.07	33.616	9.487	42.589	31.357	281.238																										Q4/2013	7.07	85.692	31.357	281.238
Q1/2014	2014-03-31	6.622	34.376	9.596	42.495	31.547	281.71																										Q1/2014	6.622	86.467	31.547	281.71
Q2/2014	2014-06-30	6.452	36.127	9.546	43.281	31.764	284.045																										Q2/2014	6.452	88.954	31.764	284.045
Q3/2014	2014-09-30	6.341	35.122	9.445	43.638	32.144	286.145																										Q3/2014	6.341	88.205	32.144	286.145
Q4/2014	2014-12-31	6.383	35.633	9.579	43.678	32.44	287.828																										Q4/2014	6.383	88.89	32.44	287.828
Q1/2015	2015-03-31	6.544	34.558	9.786	43.476	31.182	288.699																										Q1/2015	6.544	87.82	31.182	288.699
Q2/2015	2015-06-30	6.663	34.052	9.505	43.113	30.61	290																										Q2/2015	6.663	86.67	30.61	290
Q3/2015	2015-09-30	6.733	35.015	9.337	43.418	30.333	291.778																										Q3/2015	6.733	87.77	30.333	291.778
Q4/2015	2015-12-31	6.847	34.399	9.225	43.382	29.934	293.297																										Q4/2015	6.847	87.006	29.934	293.297
Q1/2016	2016-03-31	6.932	34.194	9.395	43.771	29.788	295.337																										Q1/2016	6.932	87.36	29.788	295.337
Q2/2016	2016-06-30	6.947	32.298	9.481	43.263	29.407	296.524																										Q2/2016	6.947	85.042	29.407	296.524
Q3/2016	2016-09-30	6.989	34.878	9.762	43.618	29.326	297.737																										Q3/2016	6.989	88.258	29.326	297.737
Q4/2016	2016-12-31	6.963	35.769	9.6	43.764	29.558	299.312																										Q4/2016	6.963	89.133	29.558	299.312
Q1/2017	2017-03-31	6.977	36.449	9.578	44.366	30.102	301.862																										Q1/2017	6.977	90.393	30.102	301.862
Q2/2017	2017-06-30	6.986	37.15	9.762	45.106	30.49	304.935																										Q2/2017	6.986	92.018	30.49	304.935
Q3/2017	2017-09-30	6.993	37.962	10.016	45.007	30.911	306.4																										Q3/2017	6.993	92.985	30.911	306.4
Q4/2017	2017-12-31	6.985	37.962	9.939	45.412	31.274	308.323																										Q4/2017	6.985	93.313	31.274	308.323
Q1/2018	2018-03-31	6.957	38.22	9.918	45.766	31.711	309.276
Q2/2018	2018-06-30	6.992	39.57	9.871	45.843	31.897	311.324

## Sheet: Japan (Only Annual)
1960 *Y	.excel_last	A158GC@G10	A158GAFC@G10	A158GQC@G10	A158GMC@G10	A158GEC@G10	A158GCOC@G10	A158GWRC@G10	A158GTTC@G10	A158GFAC@G10	A158GTMC@G10	A158GFIC@G10	A158GLC@G10	A158GBXC@G10	A158GGC@G10	A158GDC@G10	A158GHSC@G10	A158GSOC@G10			NOTE: Given that only annual data is available, I exclude Japan from consideration when evaluating the volatility of GDP by industry.
.DESC		Japan: Gross Value Added (Bil.Chn.11.Yen)	Japan: Gross Value Added: Agriculture, Forestry & Fishing (Bil.Chn.11.Yen)	Japan: Gross Value Added: Mining (Bil.Chn.11.Yen)	Japan: Gross Value Added: Manufacturing (Bil.Chn.11.Yen)	Japan: GVA: Electricity, Gas, Water Supply & Waste Mgt Service (Bil.Chn.11.Yen)	Japan: Gross Value Added: Construction (Bil.Chn.11.Yen)	Japan: Gross Value Added: Wholesale and Retail Trade (Bil.Chn.11.Yen)	Japan: Gross Value Added: Transport and Postal Services (Bil.Chn.11.Yen)	Japan: GVA: Accommodation & Food Service Activities (Bil.Chn.11.Yen)	Japan: Gross Value Added: Information and Communications (Bil.Chn.11.Yen)	Japan: Gross Value Added: Finance and Insurance (Bil.Chn.11.Yen)	Japan: Gross Value Added: Real Estate (Bil.Chn.11.Yen)	Japan: GVA: Professional, Scientific & Technical Activities (Bil.Chn.11.Yen)	Japan: Gross Value Added: Public Administration (Bil.Chn.11.Yen)	Japan: Gross Value Added: Education (Bil.Chn.11.Yen)	Japan: GVA: Human Health and Social Work Activities (Bil.Chn.11.Yen)	Japan: Gross Value Added: Other Service Activities (Bil.Chn.11.Yen)
.T1		1990	1990	1990	1990	1994	1990	1994	1994	1994	1994	1990	1990	1994	1990	1990	1994	1994
.TN		2016	2016	2016	2016	2016	2016	2016	2016	2016	2016	2016	2016	2016	2016	2016	2016	2016
.LSOURCE		Cabinet Office of Japan	Cabinet Office of Japan	Cabinet Office of Japan	Cabinet Office of Japan	Cabinet Office of Japan	Cabinet Office of Japan	Cabinet Office of Japan	Cabinet Office of Japan	Cabinet Office of Japan	Cabinet Office of Japan	Cabinet Office of Japan	Cabinet Office of Japan	Cabinet Office of Japan	Cabinet Office of Japan	Cabinet Office of Japan	Cabinet Office of Japan	Cabinet Office of Japan
.AGG		None	None	None	None	None	None	None	None	None	None	None	None	None	None	None	None	None
.DTLM		Jan-17-2018 00:10	Jan-17-2018 00:10	Jan-17-2018 00:10	Jan-17-2018 00:10	Jan-17-2018 00:10	Jan-17-2018 00:10	Jan-17-2018 00:10	Jan-17-2018 00:10	Jan-17-2018 00:10	Jan-17-2018 00:10	Jan-17-2018 00:10	Jan-17-2018 00:10	Jan-17-2018 00:10	Jan-17-2018 00:10	Jan-17-2018 00:10	Jan-17-2018 00:10	Jan-17-2018 00:10
.FRQ		Annual	Annual	Annual	Annual	Annual	Annual	Annual	Annual	Annual	Annual	Annual	Annual	Annual	Annual	Annual	Annual	Annual
1960	1960-11-30	#N/A	#N/A	#N/A	#N/A	#N/A	#N/A	#N/A	#N/A	#N/A	#N/A	#N/A	#N/A	#N/A	#N/A	#N/A	#N/A	#N/A
1961	1961-11-30	#N/A	#N/A	#N/A	#N/A	#N/A	#N/A	#N/A	#N/A	#N/A	#N/A	#N/A	#N/A	#N/A	#N/A	#N/A	#N/A	#N/A
1962	1962-11-30	#N/A	#N/A	#N/A	#N/A	#N/A	#N/A	#N/A	#N/A	#N/A	#N/A	#N/A	#N/A	#N/A	#N/A	#N/A	#N/A	#N/A
1963	1963-11-30	#N/A	#N/A	#N/A	#N/A	#N/A	#N/A	#N/A	#N/A	#N/A	#N/A	#N/A	#N/A	#N/A	#N/A	#N/A	#N/A	#N/A
1964	1964-11-30	#N/A	#N/A	#N/A	#N/A	#N/A	#N/A	#N/A	#N/A	#N/A	#N/A	#N/A	#N/A	#N/A	#N/A	#N/A	#N/A	#N/A
1965	1965-11-30	#N/A	#N/A	#N/A	#N/A	#N/A	#N/A	#N/A	#N/A	#N/A	#N/A	#N/A	#N/A	#N/A	#N/A	#N/A	#N/A	#N/A
1966	1966-11-30	#N/A	#N/A	#N/A	#N/A	#N/A	#N/A	#N/A	#N/A	#N/A	#N/A	#N/A	#N/A	#N/A	#N/A	#N/A	#N/A	#N/A
1967	1967-11-30	#N/A	#N/A	#N/A	#N/A	#N/A	#N/A	#N/A	#N/A	#N/A	#N/A	#N/A	#N/A	#N/A	#N/A	#N/A	#N/A	#N/A
1968	1968-11-30	#N/A	#N/A	#N/A	#N/A	#N/A	#N/A	#N/A	#N/A	#N/A	#N/A	#N/A	#N/A	#N/A	#N/A	#N/A	#N/A	#N/A
1969	1969-11-30	#N/A	#N/A	#N/A	#N/A	#N/A	#N/A	#N/A	#N/A	#N/A	#N/A	#N/A	#N/A	#N/A	#N/A	#N/A	#N/A	#N/A
1970	1970-11-30	#N/A	#N/A	#N/A	#N/A	#N/A	#N/A	#N/A	#N/A	#N/A	#N/A	#N/A	#N/A	#N/A	#N/A	#N/A	#N/A	#N/A
1971	1971-11-30	#N/A	#N/A	#N/A	#N/A	#N/A	#N/A	#N/A	#N/A	#N/A	#N/A	#N/A	#N/A	#N/A	#N/A	#N/A	#N/A	#N/A
1972	1972-11-30	#N/A	#N/A	#N/A	#N/A	#N/A	#N/A	#N/A	#N/A	#N/A	#N/A	#N/A	#N/A	#N/A	#N/A	#N/A	#N/A	#N/A
1973	1973-11-30	#N/A	#N/A	#N/A	#N/A	#N/A	#N/A	#N/A	#N/A	#N/A	#N/A	#N/A	#N/A	#N/A	#N/A	#N/A	#N/A	#N/A
1974	1974-11-30	#N/A	#N/A	#N/A	#N/A	#N/A	#N/A	#N/A	#N/A	#N/A	#N/A	#N/A	#N/A	#N/A	#N/A	#N/A	#N/A	#N/A
1975	1975-11-30	#N/A	#N/A	#N/A	#N/A	#N/A	#N/A	#N/A	#N/A	#N/A	#N/A	#N/A	#N/A	#N/A	#N/A	#N/A	#N/A	#N/A
1976	1976-11-30	#N/A	#N/A	#N/A	#N/A	#N/A	#N/A	#N/A	#N/A	#N/A	#N/A	#N/A	#N/A	#N/A	#N/A	#N/A	#N/A	#N/A
1977	1977-11-30	#N/A	#N/A	#N/A	#N/A	#N/A	#N/A	#N/A	#N/A	#N/A	#N/A	#N/A	#N/A	#N/A	#N/A	#N/A	#N/A	#N/A
1978	1978-11-30	#N/A	#N/A	#N/A	#N/A	#N/A	#N/A	#N/A	#N/A	#N/A	#N/A	#N/A	#N/A	#N/A	#N/A	#N/A	#N/A	#N/A
1979	1979-11-30	#N/A	#N/A	#N/A	#N/A	#N/A	#N/A	#N/A	#N/A	#N/A	#N/A	#N/A	#N/A	#N/A	#N/A	#N/A	#N/A	#N/A
1980	1980-11-30	#N/A	#N/A	#N/A	#N/A	#N/A	#N/A	#N/A	#N/A	#N/A	#N/A	#N/A	#N/A	#N/A	#N/A	#N/A	#N/A	#N/A
1981	1981-11-30	#N/A	#N/A	#N/A	#N/A	#N/A	#N/A	#N/A	#N/A	#N/A	#N/A	#N/A	#N/A	#N/A	#N/A	#N/A	#N/A	#N/A
1982	1982-11-30	#N/A	#N/A	#N/A	#N/A	#N/A	#N/A	#N/A	#N/A	#N/A	#N/A	#N/A	#N/A	#N/A	#N/A	#N/A	#N/A	#N/A
1983	1983-11-30	#N/A	#N/A	#N/A	#N/A	#N/A	#N/A	#N/A	#N/A	#N/A	#N/A	#N/A	#N/A	#N/A	#N/A	#N/A	#N/A	#N/A
1984	1984-11-30	#N/A	#N/A	#N/A	#N/A	#N/A	#N/A	#N/A	#N/A	#N/A	#N/A	#N/A	#N/A	#N/A	#N/A	#N/A	#N/A	#N/A
1985	1985-11-30	#N/A	#N/A	#N/A	#N/A	#N/A	#N/A	#N/A	#N/A	#N/A	#N/A	#N/A	#N/A	#N/A	#N/A	#N/A	#N/A	#N/A
1986	1986-11-30	#N/A	#N/A	#N/A	#N/A	#N/A	#N/A	#N/A	#N/A	#N/A	#N/A	#N/A	#N/A	#N/A	#N/A	#N/A	#N/A	#N/A
1987	1987-11-30	#N/A	#N/A	#N/A	#N/A	#N/A	#N/A	#N/A	#N/A	#N/A	#N/A	#N/A	#N/A	#N/A	#N/A	#N/A	#N/A	#N/A
1988	1988-11-30	#N/A	#N/A	#N/A	#N/A	#N/A	#N/A	#N/A	#N/A	#N/A	#N/A	#N/A	#N/A	#N/A	#N/A	#N/A	#N/A	#N/A
1989	1989-11-30	#N/A	#N/A	#N/A	#N/A	#N/A	#N/A	#N/A	#N/A	#N/A	#N/A	#N/A	#N/A	#N/A	#N/A	#N/A	#N/A	#N/A
1990	1990-11-30	402497	6797.7	1264.2	84013	#N/A	44516.7	#N/A	#N/A	#N/A	#N/A	23068.4	44723.2	#N/A	20335.1	13476.2	#N/A	#N/A
1991	1991-11-30	417729	6029.7	1172.8	88561.9	#N/A	44054.6	#N/A	#N/A	#N/A	#N/A	22787.6	45517.7	#N/A	20586.8	14083.1	#N/A	#N/A
1992	1992-11-30	422015	6237.4	1102.5	86852	#N/A	43164.8	#N/A	#N/A	#N/A	#N/A	22585.7	46428	#N/A	20880.2	14926.3	#N/A	#N/A
1993	1993-11-30	423275	5658.4	1006.7	83869.9	#N/A	43263.2	#N/A	#N/A	#N/A	#N/A	23193.4	47809.8	#N/A	21265.9	15232.2	#N/A	#N/A
1994	1994-11-30	428692	6445.6	846.4	77688.4	10168.5	41400.9	64063.9	25710	17417.2	10481.2	29973.3	49508.3	18154.4	22255	16186	21681.4	25610.5
1995	1995-11-30	439069	6001	809.1	81348.7	10508.7	40596.2	67513.2	26734.7	17550.5	11452.3	28234.7	50049.5	18785.4	22809.1	16495.2	22723.9	25083.4
1996	1996-11-30	453666	6388.6	865.4	84842.1	11298.1	41780.1	68980.4	25376.4	18080.6	13701.1	28663.1	50672.8	20551.2	23255.8	16586.3	23518.4	25375.4
1997	1997-11-30	460066	6257.5	833.2	86808.8	11580.2	38975.4	70499.5	25397.1	18253.3	15664.3	29066.6	50704.2	21286.5	23857.7	16591.7	24310.1	25226.4
1998	1998-11-30	455211	6381	795.8	83325.9	11999.4	38097.7	68691.5	24272.3	18159.1	17678.3	27601.2	50251	22111.3	24167.6	16545.3	25059.7	25008.3
1999	1999-11-30	455314	6342.6	786.1	82752.7	12259.9	37410.2	68551.5	23919.8	17745.6	18478.1	26956	50808.8	21928.2	24456.3	16664.2	26083.1	24979.6
2000	2000-11-30	467142	6807.2	878.4	87160.1	12460.9	36188.1	67063.4	24272.2	17067.7	20009.2	26922.4	51931.2	23991.8	25237.1	16666	27638.5	26170.3
2001	2001-11-30	465618	6269.5	922.1	82798.9	12842.9	34999.2	69471.6	24404.2	16982.1	21640.4	25902.5	52416.4	25362.7	25475.9	16724.7	28223.4	25041.4
2002	2002-11-30	467292	6640.1	849.6	81882.1	12824.8	33388.6	70691.5	24675.6	16691.3	22657.6	25526.3	52963.7	26204.5	25661.3	16906.5	28038.3	25560.6
2003	2003-11-30	474056	5993.2	831.8	85663.9	12788.1	31879	71141.3	25192	16074.4	23293	25710.7	53686.4	27552.4	26040.7	17066.9	28425.3	25695.1
2004	2004-11-30	483597	5360.1	693	90450.2	13079.5	30823.7	74639.9	26054.1	15476.3	23046.9	25481.9	54430	28979.5	26052.3	17112.7	28727.1	25608.2
2005	2005-11-30	493796	5359.4	705.7	94968.9	13902.3	29786.3	75871.6	26065.9	14801	23644.1	25822.7	55129.4	31615.1	25857.6	17229.4	29516.6	25167.2
2006	2006-11-30	500581	5282.5	681.2	98674.9	13878.1	29626.4	72605.7	27558.4	14798.3	24255.7	25668.5	56455.5	33463.6	26021.1	17470.4	30068.8	25245.8
2007	2007-11-30	508856	5600.4	623.6	103955	13201	27548.1	70669.2	28606.5	14959.3	24882.4	26757.3	56863.5	35677.8	26306.8	17661.9	30767	25171.6
2008	2008-11-30	503266	6019.8	540.5	103750	13815	25631.7	69655.6	27832.8	14097.9	25427.5	22921.5	57342.5	37135.2	26376.7	17815.2	30752.9	24672.1
2009	2009-11-30	472228	5548.5	296.1	85401.3	11576.8	25241.6	66972.6	24192.9	12926.9	25061.8	23155.1	58245.5	34854	26535.7	18040.8	31436.4	23446.9
2010	2010-11-30	490194	5225.2	307.3	99346.3	12610.5	23962.2	69080.2	24969.2	12661.8	25204.4	23316.1	58957.1	34650.1	26211.8	18095	32106.3	23237.9
2011	2011-11-30	488958	5284.7	313	96639	11053.7	24093.3	70579.9	24497.4	12450.9	25383.8	23110	59528	35681.8	26422.7	18519.9	32496.2	22903.5
2012	2012-11-30	495305	5318.1	270.3	98974.9	8882.6	24569.4	73505.3	25076.2	11906.9	25496.1	23745.8	59715.2	35813	26363.2	18698.8	33822.7	23146.5
2013	2013-11-30	504902	5333.5	294	98886.8	9471.3	26811.5	74786.7	25255.4	12623.8	26228.4	25800.7	60631.5	36475.6	26198.4	18765.9	34640.2	22705.2
2014	2014-11-30	507231	5165.6	283.7	101847	9574.9	27863.3	71941.7	25840.4	12759.5	26378.5	25808.4	61409.6	36056	26305.6	18891.5	34457.1	22661.7
2015	2015-11-30	512671	4916.5	229.3	105685	8393.8	28044.3	73267.3	24711.9	12067.1	26948.1	26835.3	62162.3	36418.2	26262.3	19103.5	35867.7	22278.8
2016	2016-11-30	516188	4272.1	213.8	107760	8743.1	28365.3	73327.1	24250.6	11891.4	26896.1	26397.4	62933.6	37318.5	26247.9	19215	36886.7	21864.7
2017	2017-11-30	#N/A	#N/A	#N/A	#N/A	#N/A	#N/A	#N/A	#N/A	#N/A	#N/A	#N/A	#N/A	#N/A	#N/A	#N/A	#N/A	#N/A

## Sheet: Spain (Quarterly)
Q1/1960 !Q mag=bil	.excel_last	S184GAFC@G10	S184GXc@G10	S184GCOc@G10	S184GVZc@G10
.DESC		Spain: GDP: Agriculture, Forestry & Fishing (SA/WDA, Bil.Chn.2010.Euros)	Spain: GDP: Industry (SA/WDA, Bil.Chn.2010.Euros)	Spain: GDP: Construction (SA/WDA, Bil.Chn.2010.Euros)	Spain: GDP: Services (SA/WDA, Bil.Chn.2010.Euros)
.T1		Q1-1995	Q1-1995	Q1-1995	Q1-1995
.TN		Q2-2018	Q2-2018	Q2-2018	Q2-2018
.LSOURCE		Instituto Nacional de Estadística	Instituto Nacional de Estadística	Instituto Nacional de Estadística	Instituto Nacional de Estadística			FINAL SERIES
.DTLM		Sep-28-2018 02:20	Sep-28-2018 02:20	Sep-28-2018 02:20	Sep-28-2018 02:20			PRIMARY	SECONDARY	CONSTRUCTION	TERTIARY
Q1/1960	1960-03-31	#N/A	#N/A	#N/A	#N/A		Q1/1960	#N/A	#N/A	#N/A	#N/A
Q2/1960	1960-06-30	#N/A	#N/A	#N/A	#N/A		Q2/1960	#N/A	#N/A	#N/A	#N/A
Q3/1960	1960-09-30	#N/A	#N/A	#N/A	#N/A		Q3/1960	#N/A	#N/A	#N/A	#N/A
Q4/1960	1960-12-31	#N/A	#N/A	#N/A	#N/A		Q4/1960	#N/A	#N/A	#N/A	#N/A
Q1/1961	1961-03-31	#N/A	#N/A	#N/A	#N/A		Q1/1961	#N/A	#N/A	#N/A	#N/A
Q2/1961	1961-06-30	#N/A	#N/A	#N/A	#N/A		Q2/1961	#N/A	#N/A	#N/A	#N/A
Q3/1961	1961-09-30	#N/A	#N/A	#N/A	#N/A		Q3/1961	#N/A	#N/A	#N/A	#N/A
Q4/1961	1961-12-31	#N/A	#N/A	#N/A	#N/A		Q4/1961	#N/A	#N/A	#N/A	#N/A
Q1/1962	1962-03-31	#N/A	#N/A	#N/A	#N/A		Q1/1962	#N/A	#N/A	#N/A	#N/A
Q2/1962	1962-06-30	#N/A	#N/A	#N/A	#N/A		Q2/1962	#N/A	#N/A	#N/A	#N/A
Q3/1962	1962-09-30	#N/A	#N/A	#N/A	#N/A		Q3/1962	#N/A	#N/A	#N/A	#N/A
Q4/1962	1962-12-31	#N/A	#N/A	#N/A	#N/A		Q4/1962	#N/A	#N/A	#N/A	#N/A
Q1/1963	1963-03-31	#N/A	#N/A	#N/A	#N/A		Q1/1963	#N/A	#N/A	#N/A	#N/A
Q2/1963	1963-06-30	#N/A	#N/A	#N/A	#N/A		Q2/1963	#N/A	#N/A	#N/A	#N/A
Q3/1963	1963-09-30	#N/A	#N/A	#N/A	#N/A		Q3/1963	#N/A	#N/A	#N/A	#N/A
Q4/1963	1963-12-31	#N/A	#N/A	#N/A	#N/A		Q4/1963	#N/A	#N/A	#N/A	#N/A
Q1/1964	1964-03-31	#N/A	#N/A	#N/A	#N/A		Q1/1964	#N/A	#N/A	#N/A	#N/A
Q2/1964	1964-06-30	#N/A	#N/A	#N/A	#N/A		Q2/1964	#N/A	#N/A	#N/A	#N/A
Q3/1964	1964-09-30	#N/A	#N/A	#N/A	#N/A		Q3/1964	#N/A	#N/A	#N/A	#N/A
Q4/1964	1964-12-31	#N/A	#N/A	#N/A	#N/A		Q4/1964	#N/A	#N/A	#N/A	#N/A
Q1/1965	1965-03-31	#N/A	#N/A	#N/A	#N/A		Q1/1965	#N/A	#N/A	#N/A	#N/A
Q2/1965	1965-06-30	#N/A	#N/A	#N/A	#N/A		Q2/1965	#N/A	#N/A	#N/A	#N/A
Q3/1965	1965-09-30	#N/A	#N/A	#N/A	#N/A		Q3/1965	#N/A	#N/A	#N/A	#N/A
Q4/1965	1965-12-31	#N/A	#N/A	#N/A	#N/A		Q4/1965	#N/A	#N/A	#N/A	#N/A
Q1/1966	1966-03-31	#N/A	#N/A	#N/A	#N/A		Q1/1966	#N/A	#N/A	#N/A	#N/A
Q2/1966	1966-06-30	#N/A	#N/A	#N/A	#N/A		Q2/1966	#N/A	#N/A	#N/A	#N/A
Q3/1966	1966-09-30	#N/A	#N/A	#N/A	#N/A		Q3/1966	#N/A	#N/A	#N/A	#N/A
Q4/1966	1966-12-31	#N/A	#N/A	#N/A	#N/A		Q4/1966	#N/A	#N/A	#N/A	#N/A
Q1/1967	1967-03-31	#N/A	#N/A	#N/A	#N/A		Q1/1967	#N/A	#N/A	#N/A	#N/A
Q2/1967	1967-06-30	#N/A	#N/A	#N/A	#N/A		Q2/1967	#N/A	#N/A	#N/A	#N/A
Q3/1967	1967-09-30	#N/A	#N/A	#N/A	#N/A		Q3/1967	#N/A	#N/A	#N/A	#N/A
Q4/1967	1967-12-31	#N/A	#N/A	#N/A	#N/A		Q4/1967	#N/A	#N/A	#N/A	#N/A
Q1/1968	1968-03-31	#N/A	#N/A	#N/A	#N/A		Q1/1968	#N/A	#N/A	#N/A	#N/A
Q2/1968	1968-06-30	#N/A	#N/A	#N/A	#N/A		Q2/1968	#N/A	#N/A	#N/A	#N/A
Q3/1968	1968-09-30	#N/A	#N/A	#N/A	#N/A		Q3/1968	#N/A	#N/A	#N/A	#N/A
Q4/1968	1968-12-31	#N/A	#N/A	#N/A	#N/A		Q4/1968	#N/A	#N/A	#N/A	#N/A
Q1/1969	1969-03-31	#N/A	#N/A	#N/A	#N/A		Q1/1969	#N/A	#N/A	#N/A	#N/A
Q2/1969	1969-06-30	#N/A	#N/A	#N/A	#N/A		Q2/1969	#N/A	#N/A	#N/A	#N/A
Q3/1969	1969-09-30	#N/A	#N/A	#N/A	#N/A		Q3/1969	#N/A	#N/A	#N/A	#N/A
Q4/1969	1969-12-31	#N/A	#N/A	#N/A	#N/A		Q4/1969	#N/A	#N/A	#N/A	#N/A
Q1/1970	1970-03-31	#N/A	#N/A	#N/A	#N/A		Q1/1970	#N/A	#N/A	#N/A	#N/A
Q2/1970	1970-06-30	#N/A	#N/A	#N/A	#N/A		Q2/1970	#N/A	#N/A	#N/A	#N/A
Q3/1970	1970-09-30	#N/A	#N/A	#N/A	#N/A		Q3/1970	#N/A	#N/A	#N/A	#N/A
Q4/1970	1970-12-31	#N/A	#N/A	#N/A	#N/A		Q4/1970	#N/A	#N/A	#N/A	#N/A
Q1/1971	1971-03-31	#N/A	#N/A	#N/A	#N/A		Q1/1971	#N/A	#N/A	#N/A	#N/A
Q2/1971	1971-06-30	#N/A	#N/A	#N/A	#N/A		Q2/1971	#N/A	#N/A	#N/A	#N/A
Q3/1971	1971-09-30	#N/A	#N/A	#N/A	#N/A		Q3/1971	#N/A	#N/A	#N/A	#N/A
Q4/1971	1971-12-31	#N/A	#N/A	#N/A	#N/A		Q4/1971	#N/A	#N/A	#N/A	#N/A
Q1/1972	1972-03-31	#N/A	#N/A	#N/A	#N/A		Q1/1972	#N/A	#N/A	#N/A	#N/A
Q2/1972	1972-06-30	#N/A	#N/A	#N/A	#N/A		Q2/1972	#N/A	#N/A	#N/A	#N/A
Q3/1972	1972-09-30	#N/A	#N/A	#N/A	#N/A		Q3/1972	#N/A	#N/A	#N/A	#N/A
Q4/1972	1972-12-31	#N/A	#N/A	#N/A	#N/A		Q4/1972	#N/A	#N/A	#N/A	#N/A
Q1/1973	1973-03-31	#N/A	#N/A	#N/A	#N/A		Q1/1973	#N/A	#N/A	#N/A	#N/A
Q2/1973	1973-06-30	#N/A	#N/A	#N/A	#N/A		Q2/1973	#N/A	#N/A	#N/A	#N/A
Q3/1973	1973-09-30	#N/A	#N/A	#N/A	#N/A		Q3/1973	#N/A	#N/A	#N/A	#N/A
Q4/1973	1973-12-31	#N/A	#N/A	#N/A	#N/A		Q4/1973	#N/A	#N/A	#N/A	#N/A
Q1/1974	1974-03-31	#N/A	#N/A	#N/A	#N/A		Q1/1974	#N/A	#N/A	#N/A	#N/A
Q2/1974	1974-06-30	#N/A	#N/A	#N/A	#N/A		Q2/1974	#N/A	#N/A	#N/A	#N/A
Q3/1974	1974-09-30	#N/A	#N/A	#N/A	#N/A		Q3/1974	#N/A	#N/A	#N/A	#N/A
Q4/1974	1974-12-31	#N/A	#N/A	#N/A	#N/A		Q4/1974	#N/A	#N/A	#N/A	#N/A
Q1/1975	1975-03-31	#N/A	#N/A	#N/A	#N/A		Q1/1975	#N/A	#N/A	#N/A	#N/A
Q2/1975	1975-06-30	#N/A	#N/A	#N/A	#N/A		Q2/1975	#N/A	#N/A	#N/A	#N/A
Q3/1975	1975-09-30	#N/A	#N/A	#N/A	#N/A		Q3/1975	#N/A	#N/A	#N/A	#N/A
Q4/1975	1975-12-31	#N/A	#N/A	#N/A	#N/A		Q4/1975	#N/A	#N/A	#N/A	#N/A
Q1/1976	1976-03-31	#N/A	#N/A	#N/A	#N/A		Q1/1976	#N/A	#N/A	#N/A	#N/A
Q2/1976	1976-06-30	#N/A	#N/A	#N/A	#N/A		Q2/1976	#N/A	#N/A	#N/A	#N/A
Q3/1976	1976-09-30	#N/A	#N/A	#N/A	#N/A		Q3/1976	#N/A	#N/A	#N/A	#N/A
Q4/1976	1976-12-31	#N/A	#N/A	#N/A	#N/A		Q4/1976	#N/A	#N/A	#N/A	#N/A
Q1/1977	1977-03-31	#N/A	#N/A	#N/A	#N/A		Q1/1977	#N/A	#N/A	#N/A	#N/A
Q2/1977	1977-06-30	#N/A	#N/A	#N/A	#N/A		Q2/1977	#N/A	#N/A	#N/A	#N/A
Q3/1977	1977-09-30	#N/A	#N/A	#N/A	#N/A		Q3/1977	#N/A	#N/A	#N/A	#N/A
Q4/1977	1977-12-31	#N/A	#N/A	#N/A	#N/A		Q4/1977	#N/A	#N/A	#N/A	#N/A
Q1/1978	1978-03-31	#N/A	#N/A	#N/A	#N/A		Q1/1978	#N/A	#N/A	#N/A	#N/A
Q2/1978	1978-06-30	#N/A	#N/A	#N/A	#N/A		Q2/1978	#N/A	#N/A	#N/A	#N/A
Q3/1978	1978-09-30	#N/A	#N/A	#N/A	#N/A		Q3/1978	#N/A	#N/A	#N/A	#N/A
Q4/1978	1978-12-31	#N/A	#N/A	#N/A	#N/A		Q4/1978	#N/A	#N/A	#N/A	#N/A
Q1/1979	1979-03-31	#N/A	#N/A	#N/A	#N/A		Q1/1979	#N/A	#N/A	#N/A	#N/A
Q2/1979	1979-06-30	#N/A	#N/A	#N/A	#N/A		Q2/1979	#N/A	#N/A	#N/A	#N/A
Q3/1979	1979-09-30	#N/A	#N/A	#N/A	#N/A		Q3/1979	#N/A	#N/A	#N/A	#N/A
Q4/1979	1979-12-31	#N/A	#N/A	#N/A	#N/A		Q4/1979	#N/A	#N/A	#N/A	#N/A
Q1/1980	1980-03-31	#N/A	#N/A	#N/A	#N/A		Q1/1980	#N/A	#N/A	#N/A	#N/A
Q2/1980	1980-06-30	#N/A	#N/A	#N/A	#N/A		Q2/1980	#N/A	#N/A	#N/A	#N/A
Q3/1980	1980-09-30	#N/A	#N/A	#N/A	#N/A		Q3/1980	#N/A	#N/A	#N/A	#N/A
Q4/1980	1980-12-31	#N/A	#N/A	#N/A	#N/A		Q4/1980	#N/A	#N/A	#N/A	#N/A
Q1/1981	1981-03-31	#N/A	#N/A	#N/A	#N/A		Q1/1981	#N/A	#N/A	#N/A	#N/A
Q2/1981	1981-06-30	#N/A	#N/A	#N/A	#N/A		Q2/1981	#N/A	#N/A	#N/A	#N/A
Q3/1981	1981-09-30	#N/A	#N/A	#N/A	#N/A		Q3/1981	#N/A	#N/A	#N/A	#N/A
Q4/1981	1981-12-31	#N/A	#N/A	#N/A	#N/A		Q4/1981	#N/A	#N/A	#N/A	#N/A
Q1/1982	1982-03-31	#N/A	#N/A	#N/A	#N/A		Q1/1982	#N/A	#N/A	#N/A	#N/A
Q2/1982	1982-06-30	#N/A	#N/A	#N/A	#N/A		Q2/1982	#N/A	#N/A	#N/A	#N/A
Q3/1982	1982-09-30	#N/A	#N/A	#N/A	#N/A		Q3/1982	#N/A	#N/A	#N/A	#N/A
Q4/1982	1982-12-31	#N/A	#N/A	#N/A	#N/A		Q4/1982	#N/A	#N/A	#N/A	#N/A
Q1/1983	1983-03-31	#N/A	#N/A	#N/A	#N/A		Q1/1983	#N/A	#N/A	#N/A	#N/A
Q2/1983	1983-06-30	#N/A	#N/A	#N/A	#N/A		Q2/1983	#N/A	#N/A	#N/A	#N/A
Q3/1983	1983-09-30	#N/A	#N/A	#N/A	#N/A		Q3/1983	#N/A	#N/A	#N/A	#N/A
Q4/1983	1983-12-31	#N/A	#N/A	#N/A	#N/A		Q4/1983	#N/A	#N/A	#N/A	#N/A
Q1/1984	1984-03-31	#N/A	#N/A	#N/A	#N/A		Q1/1984	#N/A	#N/A	#N/A	#N/A
Q2/1984	1984-06-30	#N/A	#N/A	#N/A	#N/A		Q2/1984	#N/A	#N/A	#N/A	#N/A
Q3/1984	1984-09-30	#N/A	#N/A	#N/A	#N/A		Q3/1984	#N/A	#N/A	#N/A	#N/A
Q4/1984	1984-12-31	#N/A	#N/A	#N/A	#N/A		Q4/1984	#N/A	#N/A	#N/A	#N/A
Q1/1985	1985-03-31	#N/A	#N/A	#N/A	#N/A		Q1/1985	#N/A	#N/A	#N/A	#N/A
Q2/1985	1985-06-30	#N/A	#N/A	#N/A	#N/A		Q2/1985	#N/A	#N/A	#N/A	#N/A
Q3/1985	1985-09-30	#N/A	#N/A	#N/A	#N/A		Q3/1985	#N/A	#N/A	#N/A	#N/A
Q4/1985	1985-12-31	#N/A	#N/A	#N/A	#N/A		Q4/1985	#N/A	#N/A	#N/A	#N/A
Q1/1986	1986-03-31	#N/A	#N/A	#N/A	#N/A		Q1/1986	#N/A	#N/A	#N/A	#N/A
Q2/1986	1986-06-30	#N/A	#N/A	#N/A	#N/A		Q2/1986	#N/A	#N/A	#N/A	#N/A
Q3/1986	1986-09-30	#N/A	#N/A	#N/A	#N/A		Q3/1986	#N/A	#N/A	#N/A	#N/A
Q4/1986	1986-12-31	#N/A	#N/A	#N/A	#N/A		Q4/1986	#N/A	#N/A	#N/A	#N/A
Q1/1987	1987-03-31	#N/A	#N/A	#N/A	#N/A		Q1/1987	#N/A	#N/A	#N/A	#N/A
Q2/1987	1987-06-30	#N/A	#N/A	#N/A	#N/A		Q2/1987	#N/A	#N/A	#N/A	#N/A
Q3/1987	1987-09-30	#N/A	#N/A	#N/A	#N/A		Q3/1987	#N/A	#N/A	#N/A	#N/A
Q4/1987	1987-12-31	#N/A	#N/A	#N/A	#N/A		Q4/1987	#N/A	#N/A	#N/A	#N/A
Q1/1988	1988-03-31	#N/A	#N/A	#N/A	#N/A		Q1/1988	#N/A	#N/A	#N/A	#N/A
Q2/1988	1988-06-30	#N/A	#N/A	#N/A	#N/A		Q2/1988	#N/A	#N/A	#N/A	#N/A
Q3/1988	1988-09-30	#N/A	#N/A	#N/A	#N/A		Q3/1988	#N/A	#N/A	#N/A	#N/A
Q4/1988	1988-12-31	#N/A	#N/A	#N/A	#N/A		Q4/1988	#N/A	#N/A	#N/A	#N/A
Q1/1989	1989-03-31	#N/A	#N/A	#N/A	#N/A		Q1/1989	#N/A	#N/A	#N/A	#N/A
Q2/1989	1989-06-30	#N/A	#N/A	#N/A	#N/A		Q2/1989	#N/A	#N/A	#N/A	#N/A
Q3/1989	1989-09-30	#N/A	#N/A	#N/A	#N/A		Q3/1989	#N/A	#N/A	#N/A	#N/A
Q4/1989	1989-12-31	#N/A	#N/A	#N/A	#N/A		Q4/1989	#N/A	#N/A	#N/A	#N/A
Q1/1990	1990-03-31	#N/A	#N/A	#N/A	#N/A		Q1/1990	#N/A	#N/A	#N/A	#N/A
Q2/1990	1990-06-30	#N/A	#N/A	#N/A	#N/A		Q2/1990	#N/A	#N/A	#N/A	#N/A
Q3/1990	1990-09-30	#N/A	#N/A	#N/A	#N/A		Q3/1990	#N/A	#N/A	#N/A	#N/A
Q4/1990	1990-12-31	#N/A	#N/A	#N/A	#N/A		Q4/1990	#N/A	#N/A	#N/A	#N/A
Q1/1991	1991-03-31	#N/A	#N/A	#N/A	#N/A		Q1/1991	#N/A	#N/A	#N/A	#N/A
Q2/1991	1991-06-30	#N/A	#N/A	#N/A	#N/A		Q2/1991	#N/A	#N/A	#N/A	#N/A
Q3/1991	1991-09-30	#N/A	#N/A	#N/A	#N/A		Q3/1991	#N/A	#N/A	#N/A	#N/A
Q4/1991	1991-12-31	#N/A	#N/A	#N/A	#N/A		Q4/1991	#N/A	#N/A	#N/A	#N/A
Q1/1992	1992-03-31	#N/A	#N/A	#N/A	#N/A		Q1/1992	#N/A	#N/A	#N/A	#N/A
Q2/1992	1992-06-30	#N/A	#N/A	#N/A	#N/A		Q2/1992	#N/A	#N/A	#N/A	#N/A
Q3/1992	1992-09-30	#N/A	#N/A	#N/A	#N/A		Q3/1992	#N/A	#N/A	#N/A	#N/A
Q4/1992	1992-12-31	#N/A	#N/A	#N/A	#N/A		Q4/1992	#N/A	#N/A	#N/A	#N/A
Q1/1993	1993-03-31	#N/A	#N/A	#N/A	#N/A		Q1/1993	#N/A	#N/A	#N/A	#N/A
Q2/1993	1993-06-30	#N/A	#N/A	#N/A	#N/A		Q2/1993	#N/A	#N/A	#N/A	#N/A
Q3/1993	1993-09-30	#N/A	#N/A	#N/A	#N/A		Q3/1993	#N/A	#N/A	#N/A	#N/A
Q4/1993	1993-12-31	#N/A	#N/A	#N/A	#N/A		Q4/1993	#N/A	#N/A	#N/A	#N/A
Q1/1994	1994-03-31	#N/A	#N/A	#N/A	#N/A		Q1/1994	#N/A	#N/A	#N/A	#N/A
Q2/1994	1994-06-30	#N/A	#N/A	#N/A	#N/A		Q2/1994	#N/A	#N/A	#N/A	#N/A
Q3/1994	1994-09-30	#N/A	#N/A	#N/A	#N/A		Q3/1994	#N/A	#N/A	#N/A	#N/A
Q4/1994	1994-12-31	#N/A	#N/A	#N/A	#N/A		Q4/1994	#N/A	#N/A	#N/A	#N/A
Q1/1995	1995-03-31	4.31637	31.4247	19.98	106.493		Q1/1995	4.31637	31.4247	19.98	106.493
Q2/1995	1995-06-30	4.43064	31.3312	20.0916	107.519		Q2/1995	4.43064	31.3312	20.0916	107.519
Q3/1995	1995-09-30	4.79933	31.3015	20.0063	108.084		Q3/1995	4.79933	31.3015	20.0063	108.084
Q4/1995	1995-12-31	4.97484	31.3652	19.6671	109.092		Q4/1995	4.97484	31.3652	19.6671	109.092
Q1/1996	1996-03-31	5.34732	32.3256	19.8093	108.243		Q1/1996	5.34732	32.3256	19.8093	108.243
Q2/1996	1996-06-30	5.58091	32.0324	19.7853	109.198		Q2/1996	5.58091	32.0324	19.7853	109.198
Q3/1996	1996-09-30	5.68319	32.2703	19.9231	110.435		Q3/1996	5.68319	32.2703	19.9231	110.435
Q4/1996	1996-12-31	5.79241	32.4616	19.6452	110.877		Q4/1996	5.79241	32.4616	19.6452	110.877
Q1/1997	1997-03-31	5.94645	33.4559	19.8421	110.913		Q1/1997	5.94645	33.4559	19.8421	110.913
Q2/1997	1997-06-30	5.82776	33.9106	19.9297	112.044		Q2/1997	5.82776	33.9106	19.9297	112.044
Q3/1997	1997-09-30	5.92183	34.1443	20.131	113.423		Q3/1997	5.92183	34.1443	20.131	113.423
Q4/1997	1997-12-31	6.2135	34.2633	20.3192	114.961		Q4/1997	6.2135	34.2633	20.3192	114.961
Q1/1998	1998-03-31	6.26653	35.3257	20.6912	114.784		Q1/1998	6.26653	35.3257	20.6912	114.784
Q2/1998	1998-06-30	6.14974	35.6189	20.7524	115.863		Q2/1998	6.14974	35.6189	20.7524	115.863
Q3/1998	1998-09-30	6.21161	35.7676	21.2404	117.524		Q3/1998	6.21161	35.7676	21.2404	117.524
Q4/1998	1998-12-31	6.04367	35.7081	21.4439	119.451		Q4/1998	6.04367	35.7081	21.4439	119.451
Q1/1999	1999-03-31	5.96034	36.813	21.7699	119.239		Q1/1999	5.96034	36.813	21.7699	119.239
Q2/1999	1999-06-30	6.09418	37.1317	22.2929	120.901		Q2/1999	6.09418	37.1317	22.2929	120.901
Q3/1999	1999-09-30	6.20403	37.5736	22.4198	122.633		Q3/1999	6.20403	37.5736	22.4198	122.633
Q4/1999	1999-12-31	6.22676	37.8839	22.7042	124.171		Q4/1999	6.22676	37.8839	22.7042	124.171
Q1/2000	2000-03-31	6.49128	38.8655	22.98	125.533		Q1/2000	6.49128	38.8655	22.98	125.533
Q2/2000	2000-06-30	6.62512	39.0652	23.3782	127.424		Q2/2000	6.62512	39.0652	23.3782	127.424
Q3/2000	2000-09-30	6.58219	39.1289	23.5029	129.528		Q3/2000	6.58219	39.1289	23.5029	129.528
Q4/2000	2000-12-31	6.59482	39.4264	23.7546	131.632		Q4/2000	6.59482	39.4264	23.7546	131.632
Q1/2001	2001-03-31	6.44267	40.612	24.4023	131.72		Q1/2001	6.44267	40.612	24.4023	131.72
Q2/2001	2001-06-30	6.35681	40.5568	24.9777	133.01		Q2/2001	6.35681	40.5568	24.9777	133.01
Q3/2001	2001-09-30	6.38585	40.8245	25.1287	134.743		Q3/2001	6.38585	40.8245	25.1287	134.743
Q4/2001	2001-12-31	6.71098	40.6077	25.1287	136.069		Q4/2001	6.71098	40.6077	25.1287	136.069
Q1/2002	2002-03-31	6.74318	40.901	25.6407	136.263		Q1/2002	6.74318	40.901	25.6407	136.263
Q2/2002	2002-06-30	6.4856	41.2367	25.7064	137.801		Q2/2002	6.4856	41.2367	25.7064	137.801
Q3/2002	2002-09-30	6.50833	41.2664	25.7042	138.968		Q3/2002	6.50833	41.2664	25.7042	138.968
Q4/2002	2002-12-31	6.38585	41.4789	25.7523	140.4		Q4/2002	6.38585	41.4789	25.7523	140.4
Q1/2003	2003-03-31	6.45593	42.4223	25.923	140.877		Q1/2003	6.45593	42.4223	25.923	140.877
Q2/2003	2003-06-30	6.40605	41.8741	26.1024	142.521		Q2/2003	6.40605	41.8741	26.1024	142.521
Q3/2003	2003-09-30	6.29747	42.3585	26.1265	143.529		Q3/2003	6.29747	42.3585	26.1265	143.529
Q4/2003	2003-12-31	6.75897	42.5922	26.2031	144.819		Q4/2003	6.75897	42.5922	26.2031	144.819
Q1/2004	2004-03-31	6.62954	42.8642	25.9799	145.88		Q1/2004	6.62954	42.8642	25.9799	145.88
Q2/2004	2004-06-30	6.4654	42.6305	26.1965	147.772		Q2/2004	6.4654	42.6305	26.1965	147.772
Q3/2004	2004-09-30	6.1813	43.2169	26.2447	149.805		Q3/2004	6.1813	43.2169	26.2447	149.805
Q4/2004	2004-12-31	5.98749	42.9279	26.411	151.449		Q4/2004	5.98749	42.9279	26.411	151.449
Q1/2005	2005-03-31	5.9635	43.1447	26.6954	152.845		Q1/2005	5.9635	43.1447	26.6954	152.845
Q2/2005	2005-06-30	5.79241	43.6503	26.9339	154.701		Q2/2005	5.79241	43.6503	26.9339	154.701
Q3/2005	2005-09-30	5.80945	44.1093	27.0652	156.257		Q3/2005	5.80945	44.1093	27.0652	156.257
Q4/2005	2005-12-31	5.66993	44.3897	27.2075	158.608		Q4/2005	5.66993	44.3897	27.2075	158.608
Q1/2006	2006-03-31	6.02537	44.6065	27.2162	160.5		Q1/2006	6.02537	44.6065	27.2162	160.5
Q2/2006	2006-06-30	6.19393	44.8402	27.4985	162.551		Q2/2006	6.19393	44.8402	27.4985	162.551
Q3/2006	2006-09-30	6.18888	45.4266	27.6057	164.46		Q3/2006	6.18888	45.4266	27.6057	164.46
Q4/2006	2006-12-31	6.20151	45.6901	27.6867	166.422		Q4/2006	6.20151	45.6901	27.6867	166.422
Q1/2007	2007-03-31	6.53548	45.4309	27.4197	169.781		Q1/2007	6.53548	45.4309	27.4197	169.781
Q2/2007	2007-06-30	6.55694	45.7241	27.6276	171.478		Q2/2007	6.55694	45.7241	27.6276	171.478
Q3/2007	2007-09-30	6.62576	46.2128	27.7085	173.051		Q3/2007	6.62576	46.2128	27.7085	173.051
Q4/2007	2007-12-31	6.6529	46.3997	27.7961	175.084		Q4/2007	6.6529	46.3997	27.7961	175.084
Q1/2008	2008-03-31	6.54558	45.9791	27.9799	176.127		Q1/2008	6.54558	45.9791	27.9799	176.127
Q2/2008	2008-06-30	6.47613	46.149	28.1593	176.746		Q2/2008	6.47613	46.149	28.1593	176.746
Q3/2008	2008-09-30	6.36502	45.9323	27.4766	176.092		Q3/2008	6.36502	45.9323	27.4766	176.092
Q4/2008	2008-12-31	6.26906	44.2198	27.1703	175.986		Q4/2008	6.26906	44.2198	27.1703	175.986
Q1/2009	2009-03-31	6.26779	40.9434	26.8574	175.155		Q1/2009	6.26779	40.9434	26.8574	175.155
Q2/2009	2009-06-30	6.2135	40.8415	26.0762	174.041		Q2/2009	6.2135	40.8415	26.0762	174.041
Q3/2009	2009-09-30	6.16994	40.9902	25.0543	174.36		Q3/2009	6.16994	40.9902	25.0543	174.36
Q4/2009	2009-12-31	6.07272	41.2707	24.4154	174.678		Q4/2009	6.07272	41.2707	24.4154	174.678
Q1/2010	2010-03-31	6.26527	41.8273	22.7174	175.845		Q1/2010	6.26527	41.8273	22.7174	175.845
Q2/2010	2010-06-30	6.27158	42.5072	22.1769	176.516		Q2/2010	6.27158	42.5072	22.1769	176.516
Q3/2010	2010-09-30	6.29873	42.5412	21.6802	177.347		Q3/2010	6.29873	42.5412	21.6802	177.347
Q4/2010	2010-12-31	6.41742	43.1022	20.9537	177.418		Q4/2010	6.41742	43.1022	20.9537	177.418
Q1/2011	2011-03-31	6.61565	42.9704	20.1507	177.648		Q1/2011	6.61565	42.9704	20.1507	177.648
Q2/2011	2011-06-30	6.60997	42.3288	19.4352	178.16		Q2/2011	6.60997	42.3288	19.4352	178.16
Q3/2011	2011-09-30	6.53043	42.248	18.7087	178.266		Q3/2011	6.53043	42.248	18.7087	178.266
Q4/2011	2011-12-31	6.61755	42.0653	18.0238	177.718		Q4/2011	6.61755	42.0653	18.0238	177.718
Q1/2012	2012-03-31	6.07208	41.1559	18.2207	176.711		Q1/2012	6.07208	41.1559	18.2207	176.711
Q2/2012	2012-06-30	5.84102	40.6715	17.6321	175.721		Q2/2012	5.84102	40.6715	17.6321	175.721
Q3/2012	2012-09-30	5.9212	39.9533	17.1201	175.084		Q3/2012	5.9212	39.9533	17.1201	175.084
Q4/2012	2012-12-31	5.98685	39.5794	16.6365	173.617		Q4/2012	5.98685	39.5794	16.6365	173.617
Q1/2013	2013-03-31	6.53863	38.8952	16.0566	174.13		Q1/2013	6.53863	38.8952	16.0566	174.13
Q2/2013	2013-06-30	6.81831	38.5298	15.6278	174.342		Q2/2013	6.81831	38.5298	15.6278	174.342
Q3/2013	2013-09-30	6.69962	38.7422	15.4265	174.13		Q3/2013	6.69962	38.7422	15.4265	174.13
Q4/2013	2013-12-31	6.99508	38.8485	15.1639	174.43		Q4/2013	6.99508	38.8485	15.1639	174.43
Q1/2014	2014-03-31	6.84861	38.9122	15.1289	175.544		Q1/2014	6.84861	38.9122	15.1289	175.544
Q2/2014	2014-06-30	6.67184	39.2267	15.2667	175.827		Q2/2014	6.67184	39.2267	15.2667	175.827
Q3/2014	2014-09-30	6.7697	39.6474	15.3127	176.64		Q3/2014	6.7697	39.6474	15.3127	176.64
Q4/2014	2014-12-31	6.43636	40.2933	15.3477	177.789		Q4/2014	6.43636	40.2933	15.3477	177.789
Q1/2015	2015-03-31	6.67689	40.0808	15.665	179.804		Q1/2015	6.67689	40.0808	15.665	179.804
Q2/2015	2015-06-30	6.88712	40.3613	15.9669	180.971		Q2/2015	6.88712	40.3613	15.9669	180.971
Q3/2015	2015-09-30	6.90859	40.7565	16.0304	182.58		Q3/2015	6.90859	40.7565	16.0304	182.58
Q4/2015	2015-12-31	7.21289	41.4024	16.2448	183.694		Q4/2015	7.21289	41.4024	16.2448	183.694
Q1/2016	2016-03-31	7.4509	42.299	16.2361	184.171		Q1/2016	7.4509	42.299	16.2361	184.171
Q2/2016	2016-06-30	7.53423	42.8557	16.363	185.02		Q2/2016	7.53423	42.8557	16.363	185.02
Q3/2016	2016-09-30	7.51782	43.1787	16.6562	186.222		Q3/2016	7.51782	43.1787	16.6562	186.222
Q4/2016	2016-12-31	7.45595	43.3996	16.8575	187.247		Q4/2016	7.45595	43.3996	16.8575	187.247
Q1/2017	2017-03-31	7.39597	44.2623	17.096	188.396		Q1/2017	7.39597	44.2623	17.096	188.396
Q2/2017	2017-06-30	7.34547	44.6362	17.4308	189.793		Q2/2017	7.34547	44.6362	17.4308	189.793
Q3/2017	2017-09-30	7.45532	44.9167	17.6627	190.942		Q3/2017	7.45532	44.9167	17.6627	190.942
Q4/2017	2017-12-31	7.48878	45.5456	17.9997	191.932		Q4/2017	7.48878	45.5456	17.9997	191.932
Q1/2018	2018-03-31	7.55885	45.4096	18.352	193.151
Q2/2018	2018-06-30	7.57906	45.7326	18.6759	194.212

## Sheet: QuarterlySharesByIndustry
		Primary Sector											Secondary Sector (ex. Construction)											Construction Sector											Tertiary Sector
		US	UK	FR	DE	IT	CA	JP	SP	Percent25	Median	Percent75	US	UK	FR	DE	IT	CA	JP	SP	Percent25	Median	Percent75	US	UK	FR	DE	IT	CA	JP	SP	Percent25	Median	Percent75	US	UK	FR	DE	IT	CA	JP	SP	Percent25	Median	Percent75
Q1/1960	1960-03-31	#N/A	44.055	2.964	#N/A	#N/A	#N/A	#N/A	#N/A	#NUM!	23.5095	#NUM!	#N/A	54.3359	13.982	#N/A	#N/A	#N/A	#N/A	#N/A	#NUM!	34.1589	#NUM!	#N/A	48.5711	12.215	#N/A	#N/A	#N/A	#N/A	#N/A	#NUM!	30.3931	#NUM!	#N/A	24.3484	68.78	#N/A	#N/A	#N/A	#N/A	#N/A	#NUM!	46.5642	#NUM!
Q2/1960	1960-06-30	#N/A	44.3356	3.241	#N/A	#N/A	#N/A	#N/A	#N/A	#NUM!	23.7883	#NUM!	#N/A	54.2272	14.417	#N/A	#N/A	#N/A	#N/A	#N/A	#NUM!	34.3221	#NUM!	#N/A	48.5711	12.302	#N/A	#N/A	#N/A	#N/A	#N/A	#NUM!	30.4366	#NUM!	#N/A	24.4249	70.152	#N/A	#N/A	#N/A	#N/A	#N/A	#NUM!	47.2885	#NUM!
Q3/1960	1960-09-30	#N/A	44.8968	3.308	#N/A	#N/A	#N/A	#N/A	#N/A	#NUM!	24.1024	#NUM!	#N/A	54.5532	14.773	#N/A	#N/A	#N/A	#N/A	#N/A	#NUM!	34.6631	#NUM!	#N/A	48.4745	12.453	#N/A	#N/A	#N/A	#N/A	#N/A	#NUM!	30.4638	#NUM!	#N/A	24.6546	71.271	#N/A	#N/A	#N/A	#N/A	#N/A	#NUM!	47.9628	#NUM!
Q4/1960	1960-12-31	#N/A	45.645	3.328	#N/A	#N/A	#N/A	#N/A	#N/A	#NUM!	24.4865	#NUM!	#N/A	55.0966	14.673	#N/A	#N/A	#N/A	#N/A	#N/A	#NUM!	34.8848	#NUM!	#N/A	50.2127	12.712	#N/A	#N/A	#N/A	#N/A	#N/A	#NUM!	31.4623	#NUM!	#N/A	24.5781	72.464	#N/A	#N/A	#N/A	#N/A	#N/A	#NUM!	48.521	#NUM!
Q1/1961	1961-03-31	#N/A	45.645	3.135	#N/A	#N/A	#N/A	#N/A	#N/A	#NUM!	24.39	#NUM!	#N/A	54.3359	15.267	#N/A	#N/A	#N/A	#N/A	#N/A	#NUM!	34.8014	#NUM!	#N/A	51.8542	13.252	#N/A	#N/A	#N/A	#N/A	#N/A	#NUM!	32.5531	#NUM!	#N/A	25.1906	73.223	#N/A	#N/A	#N/A	#N/A	#N/A	#NUM!	49.2068	#NUM!
Q2/1961	1961-06-30	#N/A	45.2709	3.082	#N/A	#N/A	#N/A	#N/A	#N/A	#NUM!	24.1765	#NUM!	#N/A	55.2053	15.171	#N/A	#N/A	#N/A	#N/A	#N/A	#NUM!	35.1881	#NUM!	#N/A	52.9164	13.507	#N/A	#N/A	#N/A	#N/A	#N/A	#NUM!	33.2117	#NUM!	#N/A	25.0375	74.084	#N/A	#N/A	#N/A	#N/A	#N/A	#NUM!	49.5607	#NUM!
Q3/1961	1961-09-30	#N/A	44.8032	3.014	#N/A	#N/A	#N/A	#N/A	#N/A	#NUM!	23.9086	#NUM!	#N/A	54.9879	15.249	#N/A	#N/A	#N/A	#N/A	#N/A	#NUM!	35.1185	#NUM!	#N/A	53.3027	13.89	#N/A	#N/A	#N/A	#N/A	#N/A	#NUM!	33.5963	#NUM!	#N/A	25.1906	74.801	#N/A	#N/A	#N/A	#N/A	#N/A	#NUM!	49.9958	#NUM!
Q4/1961	1961-12-31	#N/A	44.3356	2.941	#N/A	#N/A	#N/A	#N/A	#N/A	#NUM!	23.6383	#NUM!	#N/A	54.5532	15.575	#N/A	#N/A	#N/A	#N/A	#N/A	#NUM!	35.0641	#NUM!	#N/A	52.9164	14.156	#N/A	#N/A	#N/A	#N/A	#N/A	#NUM!	33.5362	#NUM!	#N/A	25.0375	75.602	#N/A	#N/A	#N/A	#N/A	#N/A	#NUM!	50.3197	#NUM!
Q1/1962	1962-03-31	#N/A	44.5226	3.221	#N/A	#N/A	#N/A	#N/A	#N/A	#NUM!	23.8718	#NUM!	#N/A	54.5532	16.054	#N/A	#N/A	#N/A	#N/A	#N/A	#NUM!	35.3036	#NUM!	#N/A	53.4958	14.444	#N/A	#N/A	#N/A	#N/A	#N/A	#NUM!	33.9699	#NUM!	#N/A	25.1906	77.156	#N/A	#N/A	#N/A	#N/A	#N/A	#NUM!	51.1733	#NUM!
Q2/1962	1962-06-30	#N/A	46.0192	3.257	#N/A	#N/A	#N/A	#N/A	#N/A	#NUM!	24.6381	#NUM!	#N/A	55.4226	16.136	#N/A	#N/A	#N/A	#N/A	#N/A	#NUM!	35.7793	#NUM!	#N/A	53.9786	14.618	#N/A	#N/A	#N/A	#N/A	#N/A	#NUM!	34.2983	#NUM!	#N/A	25.4203	78.118	#N/A	#N/A	#N/A	#N/A	#N/A	#NUM!	51.7691	#NUM!
Q3/1962	1962-09-30	#N/A	47.2351	3.368	#N/A	#N/A	#N/A	#N/A	#N/A	#NUM!	25.3016	#NUM!	#N/A	55.7486	16.482	#N/A	#N/A	#N/A	#N/A	#N/A	#NUM!	36.1153	#NUM!	#N/A	54.0752	14.652	#N/A	#N/A	#N/A	#N/A	#N/A	#NUM!	34.3636	#NUM!	#N/A	25.5734	79.265	#N/A	#N/A	#N/A	#N/A	#N/A	#NUM!	52.4192	#NUM!
Q4/1962	1962-12-31	#N/A	48.077	3.407	#N/A	#N/A	#N/A	#N/A	#N/A	#NUM!	25.742	#NUM!	#N/A	55.2053	16.81	#N/A	#N/A	#N/A	#N/A	#N/A	#NUM!	36.0076	#NUM!	#N/A	51.2749	14.489	#N/A	#N/A	#N/A	#N/A	#N/A	#NUM!	32.8819	#NUM!	#N/A	25.65	80.538	#N/A	#N/A	#N/A	#N/A	#N/A	#NUM!	53.094	#NUM!
Q1/1963	1963-03-31	#N/A	47.7964	3.22	#N/A	#N/A	#N/A	#N/A	#N/A	#NUM!	25.5082	#NUM!	#N/A	54.6619	15.965	#N/A	#N/A	#N/A	#N/A	#N/A	#NUM!	35.3135	#NUM!	#N/A	45.6742	14.34	#N/A	#N/A	#N/A	#N/A	#N/A	#NUM!	30.0071	#NUM!	#N/A	25.4969	79.84	#N/A	#N/A	#N/A	#N/A	#N/A	#NUM!	52.6684	#NUM!
Q2/1963	1963-06-30	#N/A	48.4511	3.139	#N/A	#N/A	#N/A	#N/A	#N/A	#NUM!	25.795	#NUM!	#N/A	56.4007	18.132	#N/A	#N/A	#N/A	#N/A	#N/A	#NUM!	37.2663	#NUM!	#N/A	54.4614	15.065	#N/A	#N/A	#N/A	#N/A	#N/A	#NUM!	34.7632	#NUM!	#N/A	26.3391	83.337	#N/A	#N/A	#N/A	#N/A	#N/A	#NUM!	54.8381	#NUM!
Q3/1963	1963-09-30	#N/A	48.3576	3.106	#N/A	#N/A	#N/A	#N/A	#N/A	#NUM!	25.7318	#NUM!	#N/A	58.0307	19.093	#N/A	#N/A	#N/A	#N/A	#N/A	#NUM!	38.5619	#NUM!	#N/A	55.1374	15.915	#N/A	#N/A	#N/A	#N/A	#N/A	#NUM!	35.5262	#NUM!	#N/A	26.5688	85.504	#N/A	#N/A	#N/A	#N/A	#N/A	#NUM!	56.0364	#NUM!
Q4/1963	1963-12-31	#N/A	48.5446	3.109	#N/A	#N/A	#N/A	#N/A	#N/A	#NUM!	25.8268	#NUM!	#N/A	59.2261	18.746	#N/A	#N/A	#N/A	#N/A	#N/A	#NUM!	38.9861	#NUM!	#N/A	57.1652	15.685	#N/A	#N/A	#N/A	#N/A	#N/A	#NUM!	36.4251	#NUM!	#N/A	26.7985	85.705	#N/A	#N/A	#N/A	#N/A	#N/A	#NUM!	56.2518	#NUM!
Q1/1964	1964-03-31	#N/A	49.0123	3.122	#N/A	#N/A	#N/A	#N/A	#N/A	#NUM!	26.0672	#NUM!	#N/A	61.1822	19.379	#N/A	#N/A	#N/A	#N/A	#N/A	#NUM!	40.2806	#NUM!	#N/A	57.8411	16.517	#N/A	#N/A	#N/A	#N/A	#N/A	#NUM!	37.1791	#NUM!	#N/A	26.8751	87.267	#N/A	#N/A	#N/A	#N/A	#N/A	#NUM!	57.071	#NUM!
Q2/1964	1964-06-30	#N/A	49.9477	3.162	#N/A	#N/A	#N/A	#N/A	#N/A	#NUM!	26.5548	#NUM!	#N/A	61.0735	19.016	#N/A	#N/A	#N/A	#N/A	#N/A	#NUM!	40.0448	#NUM!	#N/A	58.8068	16.837	#N/A	#N/A	#N/A	#N/A	#N/A	#NUM!	37.8219	#NUM!	#N/A	27.2579	88.172	#N/A	#N/A	#N/A	#N/A	#N/A	#NUM!	57.715	#NUM!
Q3/1964	1964-09-30	#N/A	50.7895	3.19	#N/A	#N/A	#N/A	#N/A	#N/A	#NUM!	26.9897	#NUM!	#N/A	61.7256	19.2	#N/A	#N/A	#N/A	#N/A	#N/A	#NUM!	40.4628	#NUM!	#N/A	58.2274	17.428	#N/A	#N/A	#N/A	#N/A	#N/A	#NUM!	37.8277	#NUM!	#N/A	27.411	88.862	#N/A	#N/A	#N/A	#N/A	#N/A	#NUM!	58.1365	#NUM!
Q4/1964	1964-12-31	#N/A	51.0701	3.232	#N/A	#N/A	#N/A	#N/A	#N/A	#NUM!	27.151	#NUM!	#N/A	63.3557	19.369	#N/A	#N/A	#N/A	#N/A	#N/A	#NUM!	41.3623	#NUM!	#N/A	59.3861	18.213	#N/A	#N/A	#N/A	#N/A	#N/A	#NUM!	38.7996	#NUM!	#N/A	27.7939	89.718	#N/A	#N/A	#N/A	#N/A	#N/A	#NUM!	58.7559	#NUM!
Q1/1965	1965-03-31	#N/A	51.8184	3.273	#N/A	#N/A	#N/A	#N/A	#N/A	#NUM!	27.5457	#NUM!	#N/A	63.3557	19.255	#N/A	#N/A	#N/A	#N/A	#N/A	#NUM!	41.3053	#NUM!	#N/A	62.4762	18.239	#N/A	#N/A	#N/A	#N/A	#N/A	#NUM!	40.3576	#NUM!	#N/A	27.7173	90.219	#N/A	#N/A	#N/A	#N/A	#N/A	#NUM!	58.9682	#NUM!
Q2/1965	1965-06-30	#N/A	51.7248	3.299	#N/A	#N/A	#N/A	#N/A	#N/A	#NUM!	27.5119	#NUM!	#N/A	63.3557	20.157	#N/A	#N/A	#N/A	#N/A	#N/A	#NUM!	41.7563	#NUM!	#N/A	60.5449	18.318	#N/A	#N/A	#N/A	#N/A	#N/A	#NUM!	39.4314	#NUM!	#N/A	27.8704	91.534	#N/A	#N/A	#N/A	#N/A	#N/A	#NUM!	59.7022	#NUM!
Q3/1965	1965-09-30	#N/A	51.2571	3.303	#N/A	#N/A	#N/A	#N/A	#N/A	#NUM!	27.2801	#NUM!	#N/A	63.3557	20.885	#N/A	#N/A	#N/A	#N/A	#N/A	#NUM!	42.1203	#NUM!	#N/A	60.4483	18.407	#N/A	#N/A	#N/A	#N/A	#N/A	#NUM!	39.4277	#NUM!	#N/A	28.1001	92.751	#N/A	#N/A	#N/A	#N/A	#N/A	#NUM!	60.4256	#NUM!
Q4/1965	1965-12-31	#N/A	51.3507	3.274	#N/A	#N/A	#N/A	#N/A	#N/A	#NUM!	27.3123	#NUM!	#N/A	64.225	21.198	#N/A	#N/A	#N/A	#N/A	#N/A	#NUM!	42.7115	#NUM!	#N/A	61.7037	19.01	#N/A	#N/A	#N/A	#N/A	#N/A	#NUM!	40.3568	#NUM!	#N/A	28.3299	93.717	#N/A	#N/A	#N/A	#N/A	#N/A	#NUM!	61.0234	#NUM!
Q1/1966	1966-03-31	#N/A	52.5666	3.255	#N/A	#N/A	#N/A	#N/A	#N/A	#NUM!	27.9108	#NUM!	#N/A	64.8771	21.347	#N/A	#N/A	#N/A	#N/A	#N/A	#NUM!	43.112	#NUM!	#N/A	61.5105	18.9	#N/A	#N/A	#N/A	#N/A	#N/A	#NUM!	40.2053	#NUM!	#N/A	28.4064	94.618	#N/A	#N/A	#N/A	#N/A	#N/A	#NUM!	61.5122	#NUM!
Q2/1966	1966-06-30	#N/A	51.9119	3.249	#N/A	#N/A	#N/A	#N/A	#N/A	#NUM!	27.5804	#NUM!	#N/A	64.8771	21.649	#N/A	#N/A	#N/A	#N/A	#N/A	#NUM!	43.263	#NUM!	#N/A	62.1865	19.31	#N/A	#N/A	#N/A	#N/A	#N/A	#NUM!	40.7482	#NUM!	#N/A	28.6361	96.146	#N/A	#N/A	#N/A	#N/A	#N/A	#NUM!	62.3911	#NUM!
Q3/1966	1966-09-30	#N/A	51.0701	3.274	#N/A	#N/A	#N/A	#N/A	#N/A	#NUM!	27.172	#NUM!	#N/A	64.9857	22.311	#N/A	#N/A	#N/A	#N/A	#N/A	#NUM!	43.6484	#NUM!	#N/A	62.7658	19.408	#N/A	#N/A	#N/A	#N/A	#N/A	#NUM!	41.0869	#NUM!	#N/A	28.6361	97.521	#N/A	#N/A	#N/A	#N/A	#N/A	#NUM!	63.0786	#NUM!
Q4/1966	1966-12-31	#N/A	51.4442	3.309	#N/A	#N/A	#N/A	#N/A	#N/A	#NUM!	27.3766	#NUM!	#N/A	63.3557	22.24	#N/A	#N/A	#N/A	#N/A	#N/A	#NUM!	42.7978	#NUM!	#N/A	63.1521	19.55	#N/A	#N/A	#N/A	#N/A	#N/A	#NUM!	41.351	#NUM!	#N/A	28.7127	98.35	#N/A	#N/A	#N/A	#N/A	#N/A	#NUM!	63.5313	#NUM!
Q1/1967	1967-03-31	#N/A	52.286	3.401	#N/A	#N/A	#N/A	#N/A	#N/A	#NUM!	27.8435	#NUM!	#N/A	64.225	22.466	#N/A	#N/A	#N/A	#N/A	#N/A	#NUM!	43.3455	#NUM!	#N/A	64.3108	20.081	#N/A	#N/A	#N/A	#N/A	#N/A	#NUM!	42.1959	#NUM!	#N/A	28.8658	99.399	#N/A	#N/A	#N/A	#N/A	#N/A	#NUM!	64.1324	#NUM!
Q2/1967	1967-06-30	#N/A	53.2214	3.5	#N/A	#N/A	#N/A	#N/A	#N/A	#NUM!	28.3607	#NUM!	#N/A	64.8771	22.376	#N/A	#N/A	#N/A	#N/A	#N/A	#NUM!	43.6265	#NUM!	#N/A	64.504	20.476	#N/A	#N/A	#N/A	#N/A	#N/A	#NUM!	42.49	#NUM!	#N/A	29.0955	100.563	#N/A	#N/A	#N/A	#N/A	#N/A	#NUM!	64.8293	#NUM!
Q3/1967	1967-09-30	#N/A	54.0632	3.564	#N/A	#N/A	#N/A	#N/A	#N/A	#NUM!	28.8136	#NUM!	#N/A	64.7684	23.347	#N/A	#N/A	#N/A	#N/A	#N/A	#NUM!	44.0577	#NUM!	#N/A	65.2765	20.706	#N/A	#N/A	#N/A	#N/A	#N/A	#NUM!	42.9912	#NUM!	#N/A	29.3252	102.142	#N/A	#N/A	#N/A	#N/A	#N/A	#NUM!	65.7336	#NUM!
Q4/1967	1967-12-31	#N/A	54.0632	3.645	#N/A	#N/A	#N/A	#N/A	#N/A	#NUM!	28.8541	#NUM!	#N/A	66.2898	23.592	#N/A	#N/A	#N/A	#N/A	#N/A	#NUM!	44.9409	#NUM!	#N/A	65.4696	20.391	#N/A	#N/A	#N/A	#N/A	#N/A	#NUM!	42.9303	#NUM!	#N/A	29.5549	103.885	#N/A	#N/A	#N/A	#N/A	#N/A	#NUM!	66.72	#NUM!
Q1/1968	1968-03-31	#N/A	55.1856	3.705	#N/A	#N/A	#N/A	#N/A	#N/A	#NUM!	29.4453	#NUM!	#N/A	68.8979	25.343	#N/A	#N/A	#N/A	#N/A	#N/A	#NUM!	47.1205	#NUM!	#N/A	66.8215	20.433	#N/A	#N/A	#N/A	#N/A	#N/A	#NUM!	43.6272	#NUM!	#N/A	30.1675	106.471	#N/A	#N/A	#N/A	#N/A	#N/A	#NUM!	68.3192	#NUM!
Q2/1968	1968-06-30	#N/A	54.1567	3.682	#N/A	#N/A	#N/A	#N/A	#N/A	#NUM!	28.9194	#NUM!	#N/A	69.876	20.193	#N/A	#N/A	#N/A	#N/A	#N/A	#NUM!	45.0345	#NUM!	#N/A	66.4352	19.831	#N/A	#N/A	#N/A	#N/A	#N/A	#NUM!	43.1331	#NUM!	#N/A	29.8612	104.472	#N/A	#N/A	#N/A	#N/A	#N/A	#NUM!	67.1666	#NUM!
Q3/1968	1968-09-30	#N/A	52.5666	3.678	#N/A	#N/A	#N/A	#N/A	#N/A	#NUM!	28.1223	#NUM!	#N/A	70.528	25.767	#N/A	#N/A	#N/A	#N/A	#N/A	#NUM!	48.1475	#NUM!	#N/A	66.5318	20.083	#N/A	#N/A	#N/A	#N/A	#N/A	#NUM!	43.3074	#NUM!	#N/A	30.0143	110.182	#N/A	#N/A	#N/A	#N/A	#N/A	#NUM!	70.0982	#NUM!
Q4/1968	1968-12-31	#N/A	51.5377	3.649	#N/A	#N/A	#N/A	#N/A	#N/A	#NUM!	27.5934	#NUM!	#N/A	70.6367	26.304	#N/A	#N/A	#N/A	#N/A	#N/A	#NUM!	48.4703	#NUM!	#N/A	66.5318	20.03	#N/A	#N/A	#N/A	#N/A	#N/A	#NUM!	43.2809	#NUM!	#N/A	30.0909	111.734	#N/A	#N/A	#N/A	#N/A	#N/A	#NUM!	70.9124	#NUM!
Q1/1969	1969-03-31	#N/A	51.6313	3.61	#N/A	#N/A	#N/A	#N/A	#N/A	#NUM!	27.6206	#NUM!	#N/A	71.7234	26.519	#N/A	#N/A	#N/A	#N/A	#N/A	#NUM!	49.1212	#NUM!	#N/A	66.049	20.131	#N/A	#N/A	#N/A	#N/A	#N/A	#NUM!	43.09	#NUM!	#N/A	30.3206	113.391	#N/A	#N/A	#N/A	#N/A	#N/A	#NUM!	71.8558	#NUM!
Q2/1969	1969-06-30	#N/A	52.9408	3.582	#N/A	#N/A	#N/A	#N/A	#N/A	#NUM!	28.2614	#NUM!	#N/A	73.0274	26.797	#N/A	#N/A	#N/A	#N/A	#N/A	#NUM!	49.9122	#NUM!	#N/A	66.1455	20.325	#N/A	#N/A	#N/A	#N/A	#N/A	#NUM!	43.2353	#NUM!	#N/A	30.4737	115.665	#N/A	#N/A	#N/A	#N/A	#N/A	#NUM!	73.0694	#NUM!
Q3/1969	1969-09-30	#N/A	53.6891	3.597	#N/A	#N/A	#N/A	#N/A	#N/A	#NUM!	28.643	#NUM!	#N/A	72.4841	27.253	#N/A	#N/A	#N/A	#N/A	#N/A	#NUM!	49.8685	#NUM!	#N/A	66.4352	20.871	#N/A	#N/A	#N/A	#N/A	#N/A	#NUM!	43.6531	#NUM!	#N/A	30.5503	117.436	#N/A	#N/A	#N/A	#N/A	#N/A	#NUM!	73.9931	#NUM!
Q4/1969	1969-12-31	#N/A	54.5309	3.617	#N/A	#N/A	#N/A	#N/A	#N/A	#NUM!	29.0739	#NUM!	#N/A	72.2667	27.429	#N/A	#N/A	#N/A	#N/A	#N/A	#NUM!	49.8479	#NUM!	#N/A	65.6627	21.933	#N/A	#N/A	#N/A	#N/A	#N/A	#NUM!	43.7979	#NUM!	#N/A	30.5503	118.248	#N/A	#N/A	#N/A	#N/A	#N/A	#NUM!	74.3991	#NUM!
Q1/1970	1970-03-31	#N/A	55.1856	3.658	4.64442	#N/A	#N/A	#N/A	#N/A	3.658	4.64442	55.1856	#N/A	72.3754	28.798	87.0931	#N/A	#N/A	#N/A	#N/A	28.798	72.3754	87.0931	#N/A	63.0555	21.784	27.9223	#N/A	#N/A	#N/A	#N/A	21.784	27.9223	63.0555	#N/A	31.0863	120.816	135.289	#N/A	#N/A	#N/A	#N/A	31.0863	120.816	135.289
Q2/1970	1970-06-30	#N/A	56.121	3.69	4.75456	#N/A	#N/A	#N/A	#N/A	3.69	4.75456	56.121	#N/A	72.5928	29.212	89.6177	#N/A	#N/A	#N/A	#N/A	29.212	72.5928	89.6177	#N/A	65.0834	22.454	30.1708	#N/A	#N/A	#N/A	#N/A	22.454	30.1708	65.0834	#N/A	31.316	122.406	138.253	#N/A	#N/A	#N/A	#N/A	31.316	122.406	138.253
Q3/1970	1970-09-30	#N/A	56.9628	3.701	4.75907	#N/A	#N/A	#N/A	#N/A	3.701	4.75907	56.9628	#N/A	72.8101	29.631	90.3657	#N/A	#N/A	#N/A	#N/A	29.631	72.8101	90.3657	#N/A	66.1455	23.172	31.6572	#N/A	#N/A	#N/A	#N/A	23.172	31.6572	66.1455	#N/A	31.4691	123.48	140.531	#N/A	#N/A	#N/A	#N/A	31.4691	123.48	140.531
Q4/1970	1970-12-31	#N/A	57.6175	3.697	4.7449	#N/A	#N/A	#N/A	#N/A	3.697	4.7449	57.6175	#N/A	73.1361	30.391	90.339	#N/A	#N/A	#N/A	#N/A	30.391	73.1361	90.339	#N/A	64.7937	23.135	31.8987	#N/A	#N/A	#N/A	#N/A	23.135	31.8987	64.7937	#N/A	31.5457	125.386	141.56	#N/A	#N/A	#N/A	#N/A	31.5457	125.386	141.56
Q1/1971	1971-03-31	#N/A	58.2723	3.556	4.78612	#N/A	#N/A	#N/A	#N/A	3.556	4.78612	58.2723	#N/A	72.3754	30.68	88.3888	#N/A	#N/A	#N/A	#N/A	30.68	72.3754	88.3888	#N/A	64.6971	24.714	30.674	#N/A	#N/A	#N/A	#N/A	24.714	30.674	64.6971	#N/A	31.5457	126.783	142.172	#N/A	#N/A	#N/A	#N/A	31.5457	126.783	142.172
Q2/1971	1971-06-30	#N/A	59.0205	3.615	4.77259	#N/A	#N/A	#N/A	#N/A	3.615	4.77259	59.0205	#N/A	72.5928	31.149	88.5357	#N/A	#N/A	#N/A	#N/A	31.149	72.5928	88.5357	#N/A	66.2421	24.668	32.783	#N/A	#N/A	#N/A	#N/A	24.668	32.783	66.2421	#N/A	32.0816	128.183	144.682	#N/A	#N/A	#N/A	#N/A	32.0816	128.183	144.682
Q3/1971	1971-09-30	#N/A	59.9559	3.683	4.80995	#N/A	#N/A	#N/A	#N/A	3.683	4.80995	59.9559	#N/A	72.2667	31.672	89.3639	#N/A	#N/A	#N/A	#N/A	31.672	72.2667	89.3639	#N/A	65.5662	24.693	33.1844	#N/A	#N/A	#N/A	#N/A	24.693	33.1844	65.5662	#N/A	32.3879	129.78	147.438	#N/A	#N/A	#N/A	#N/A	32.3879	129.78	147.438
Q4/1971	1971-12-31	#N/A	60.6106	3.868	4.85117	#N/A	#N/A	#N/A	#N/A	3.868	4.85117	60.6106	#N/A	72.1581	31.856	88.5758	#N/A	#N/A	#N/A	#N/A	31.856	72.1581	88.5758	#N/A	67.3043	24.317	33.0448	#N/A	#N/A	#N/A	#N/A	24.317	33.0448	67.3043	#N/A	32.6942	131.292	147.291	#N/A	#N/A	#N/A	#N/A	32.6942	131.292	147.291
Q1/1972	1972-03-31	#N/A	61.4525	3.951	4.75263	#N/A	#N/A	#N/A	#N/A	3.951	4.75263	61.4525	#N/A	68.6806	31.402	89.0567	#N/A	#N/A	#N/A	#N/A	31.402	68.6806	89.0567	#N/A	67.1112	24.81	33.0506	#N/A	#N/A	#N/A	#N/A	24.81	33.0506	67.1112	#N/A	32.9239	132.714	149.495	#N/A	#N/A	#N/A	#N/A	32.9239	132.714	149.495
Q2/1972	1972-06-30	#N/A	61.2654	3.859	4.723	#N/A	#N/A	#N/A	#N/A	3.859	4.723	61.2654	#N/A	73.8968	32.319	89.7513	#N/A	#N/A	#N/A	#N/A	32.319	73.8968	89.7513	#N/A	68.5596	25.381	33.9611	#N/A	#N/A	#N/A	#N/A	25.381	33.9611	68.5596	#N/A	33.3833	134.223	151.406	#N/A	#N/A	#N/A	#N/A	33.3833	134.223	151.406
Q3/1972	1972-09-30	#N/A	61.3589	3.969	4.73975	#N/A	#N/A	#N/A	#N/A	3.969	4.73975	61.3589	#N/A	74.6575	32.477	91.942	#N/A	#N/A	#N/A	#N/A	32.477	74.6575	91.942	#N/A	66.6284	25.81	35.0112	#N/A	#N/A	#N/A	#N/A	25.81	35.0112	66.6284	#N/A	33.5364	135.779	154.945	#N/A	#N/A	#N/A	#N/A	33.5364	135.779	154.945
Q4/1972	1972-12-31	#N/A	61.4525	4.099	4.81381	#N/A	#N/A	#N/A	#N/A	4.099	4.81381	61.4525	#N/A	77.2656	32.773	93.7453	#N/A	#N/A	#N/A	#N/A	32.773	77.2656	93.7453	#N/A	66.3387	26.01	35.0752	#N/A	#N/A	#N/A	#N/A	26.01	35.0752	66.3387	#N/A	33.9958	137.716	157.603	#N/A	#N/A	#N/A	#N/A	33.9958	137.716	157.603
Q1/1973	1973-03-31	#N/A	63.3231	4.152	4.94456	#N/A	#N/A	#N/A	#N/A	4.152	4.94456	63.3231	#N/A	79.9824	33.119	95.8291	#N/A	#N/A	#N/A	#N/A	33.119	79.9824	95.8291	#N/A	70.7806	26.502	34.4643	#N/A	#N/A	#N/A	#N/A	26.502	34.4643	70.7806	#N/A	34.9146	139.835	159.329	#N/A	#N/A	#N/A	#N/A	34.9146	139.835	159.329
Q2/1973	1973-06-30	#N/A	63.0425	4.3	4.99351	#N/A	#N/A	#N/A	#N/A	4.3	4.99351	63.0425	#N/A	80.0911	34.23	96.5771	#N/A	#N/A	#N/A	#N/A	34.23	80.0911	96.5771	#N/A	68.8493	26.934	34.6388	#N/A	#N/A	#N/A	#N/A	26.934	34.6388	68.8493	#N/A	34.8381	142.038	161.02	#N/A	#N/A	#N/A	#N/A	34.8381	142.038	161.02
Q3/1973	1973-09-30	#N/A	63.2296	4.386	5.0386	#N/A	#N/A	#N/A	#N/A	4.386	5.0386	63.2296	#N/A	80.6345	34.229	97.6324	#N/A	#N/A	#N/A	#N/A	34.229	80.6345	97.6324	#N/A	68.5596	27.202	35.3748	#N/A	#N/A	#N/A	#N/A	27.202	35.3748	68.5596	#N/A	34.9146	144.622	161.044	#N/A	#N/A	#N/A	#N/A	34.9146	144.622	161.044
Q4/1973	1973-12-31	#N/A	63.6973	4.215	5.02378	#N/A	#N/A	#N/A	#N/A	4.215	5.02378	63.6973	#N/A	80.3085	34.403	97.8328	#N/A	#N/A	#N/A	#N/A	34.403	80.3085	97.8328	#N/A	66.8215	27.418	33.4956	#N/A	#N/A	#N/A	#N/A	27.418	33.4956	66.8215	#N/A	34.9912	147.462	162.526	#N/A	#N/A	#N/A	#N/A	34.9912	147.462	162.526
Q1/1974	1974-03-31	#N/A	64.352	4.221	5.18094	#N/A	#N/A	#N/A	#N/A	4.221	5.18094	64.352	#N/A	74.6575	36.405	98.7544	#N/A	#N/A	#N/A	#N/A	36.405	74.6575	98.7544	#N/A	63.9246	27.819	33.5626	#N/A	#N/A	#N/A	#N/A	27.819	33.5626	63.9246	#N/A	34.7615	150.462	164.804	#N/A	#N/A	#N/A	#N/A	34.7615	150.462	164.804
Q2/1974	1974-06-30	#N/A	65.0068	4.083	5.22473	#N/A	#N/A	#N/A	#N/A	4.083	5.22473	65.0068	#N/A	81.0692	36.869	99.7029	#N/A	#N/A	#N/A	#N/A	36.869	81.0692	99.7029	#N/A	62.959	28.02	31.2035	#N/A	#N/A	#N/A	#N/A	28.02	31.2035	62.959	#N/A	34.8381	152.896	165.465	#N/A	#N/A	#N/A	#N/A	34.8381	152.896	165.465
Q3/1974	1974-09-30	#N/A	64.352	4.02	5.22602	#N/A	#N/A	#N/A	#N/A	4.02	5.22602	64.352	#N/A	80.9605	37.691	98.5674	#N/A	#N/A	#N/A	#N/A	37.691	80.9605	98.5674	#N/A	61.3174	27.515	30.1883	#N/A	#N/A	#N/A	#N/A	27.515	30.1883	61.3174	#N/A	35.1443	154.156	167.51	#N/A	#N/A	#N/A	#N/A	35.1443	154.156	167.51
Q4/1974	1974-12-31	#N/A	62.5749	4.027	5.21894	#N/A	#N/A	#N/A	#N/A	4.027	5.21894	62.5749	#N/A	77.9177	36.079	95.3348	#N/A	#N/A	#N/A	#N/A	36.079	77.9177	95.3348	#N/A	58.324	27.806	31.1249	#N/A	#N/A	#N/A	#N/A	27.806	31.1249	58.324	#N/A	35.1443	153.336	167.008	#N/A	#N/A	#N/A	#N/A	35.1443	153.336	167.008
Q1/1975	1975-03-31	#N/A	60.7977	4.064	5.13134	#N/A	#N/A	#N/A	#N/A	4.064	5.13134	60.7977	#N/A	76.831	36.024	92.9037	#N/A	#N/A	#N/A	#N/A	36.024	76.831	92.9037	#N/A	58.9033	27.626	31.2296	#N/A	#N/A	#N/A	#N/A	27.626	31.2296	58.9033	#N/A	35.2209	151.723	167.645	#N/A	#N/A	#N/A	#N/A	35.2209	151.723	167.645
Q2/1975	1975-06-30	#N/A	59.8624	3.855	5.11331	#N/A	#N/A	#N/A	#N/A	3.855	5.11331	59.8624	#N/A	73.7881	34.763	91.7416	#N/A	#N/A	#N/A	#N/A	34.763	73.7881	91.7416	#N/A	58.6136	27.063	28.0473	#N/A	#N/A	#N/A	#N/A	27.063	28.0473	58.6136	#N/A	35.374	151.712	167.682	#N/A	#N/A	#N/A	#N/A	35.374	151.712	167.682
Q3/1975	1975-09-30	#N/A	58.4593	3.614	5.12619	#N/A	#N/A	#N/A	#N/A	3.614	5.12619	58.4593	#N/A	72.7014	35.44	92.6366	#N/A	#N/A	#N/A	#N/A	35.44	72.7014	92.6366	#N/A	58.1308	26.98	28.824	#N/A	#N/A	#N/A	#N/A	26.98	28.824	58.1308	#N/A	35.374	151.98	169.568	#N/A	#N/A	#N/A	#N/A	35.374	151.98	169.568
Q4/1975	1975-12-31	#N/A	57.3369	3.821	5.14165	#N/A	#N/A	#N/A	#N/A	3.821	5.14165	57.3369	#N/A	74.1142	36.6	95.4951	#N/A	#N/A	#N/A	#N/A	36.6	74.1142	95.4951	#N/A	57.8411	26.749	29.7636	#N/A	#N/A	#N/A	#N/A	26.749	29.7636	57.8411	#N/A	35.4506	154.193	171.65	#N/A	#N/A	#N/A	#N/A	35.4506	154.193	171.65
Q1/1976	1976-03-31	#N/A	54.9985	3.793	4.99158	#N/A	#N/A	#N/A	#N/A	3.793	4.99158	54.9985	#N/A	74.9835	36.3	96.0294	#N/A	#N/A	#N/A	#N/A	36.3	74.9835	96.0294	#N/A	58.7102	26.734	29.8276	#N/A	#N/A	#N/A	#N/A	26.734	29.8276	58.7102	#N/A	35.7569	155.846	173.646	#N/A	#N/A	#N/A	#N/A	35.7569	155.846	173.646
Q2/1976	1976-06-30	#N/A	52.8472	3.901	5.0167	#N/A	#N/A	#N/A	#N/A	3.901	5.0167	52.8472	#N/A	76.3963	36.971	98.5006	#N/A	#N/A	#N/A	#N/A	36.971	76.3963	98.5006	#N/A	57.0686	27.197	29.8188	#N/A	#N/A	#N/A	#N/A	27.197	29.8188	57.0686	#N/A	36.0631	157.193	175.605	#N/A	#N/A	#N/A	#N/A	36.0631	157.193	175.605
Q3/1976	1976-09-30	#N/A	53.3149	3.671	5.01155	#N/A	#N/A	#N/A	#N/A	3.671	5.01155	53.3149	#N/A	76.3963	38.492	98.2602	#N/A	#N/A	#N/A	#N/A	38.492	76.3963	98.2602	#N/A	56.2961	26.971	30.2959	#N/A	#N/A	#N/A	#N/A	26.971	30.2959	56.2961	#N/A	36.2163	160.054	176.671	#N/A	#N/A	#N/A	#N/A	36.2163	160.054	176.671
Q4/1976	1976-12-31	#N/A	56.121	3.549	5.02894	#N/A	#N/A	#N/A	#N/A	3.549	5.02894	56.121	#N/A	79.4391	38.481	100.651	#N/A	#N/A	#N/A	#N/A	38.481	79.4391	100.651	#N/A	58.1308	27.251	30.7555	#N/A	#N/A	#N/A	#N/A	27.251	30.7555	58.1308	#N/A	36.5225	161.664	178.887	#N/A	#N/A	#N/A	#N/A	36.5225	161.664	178.887
Q1/1977	1977-03-31	#N/A	59.1141	3.701	5.22023	#N/A	#N/A	#N/A	#N/A	3.701	5.22023	59.1141	#N/A	81.2865	39.724	101.212	#N/A	#N/A	#N/A	#N/A	39.724	81.2865	101.212	#N/A	56.5858	27.142	32.079	#N/A	#N/A	#N/A	#N/A	27.142	32.079	56.5858	#N/A	36.5225	163.861	180.394	#N/A	#N/A	#N/A	#N/A	36.5225	163.861	180.394
Q2/1977	1977-06-30	#N/A	60.7977	3.727	5.24084	#N/A	#N/A	#N/A	#N/A	3.727	5.24084	60.7977	#N/A	80.8518	39.1	101.239	#N/A	#N/A	#N/A	#N/A	39.1	80.8518	101.239	#N/A	56.7789	27.362	30.3075	#N/A	#N/A	#N/A	#N/A	27.362	30.3075	56.7789	#N/A	36.2928	165.379	182.365	#N/A	#N/A	#N/A	#N/A	36.2928	165.379	182.365
Q3/1977	1977-09-30	#N/A	62.3878	3.869	5.27304	#N/A	#N/A	#N/A	#N/A	3.869	5.27304	62.3878	#N/A	80.3085	39.504	100.678	#N/A	#N/A	#N/A	#N/A	39.504	80.3085	100.678	#N/A	57.4549	27.605	29.9381	#N/A	#N/A	#N/A	#N/A	27.605	29.9381	57.4549	#N/A	36.7522	167.087	183.455	#N/A	#N/A	#N/A	#N/A	36.7522	167.087	183.455
Q4/1977	1977-12-31	#N/A	63.1361	3.96	5.28592	#N/A	#N/A	#N/A	#N/A	3.96	5.28592	63.1361	#N/A	80.6345	40.069	102.695	#N/A	#N/A	#N/A	#N/A	40.069	80.6345	102.695	#N/A	58.6136	27.521	30.6479	#N/A	#N/A	#N/A	#N/A	27.521	30.6479	58.6136	#N/A	36.9819	168.7	185.55	#N/A	#N/A	#N/A	#N/A	36.9819	168.7	185.55
Q1/1978	1978-03-31	#N/A	64.8197	4.157	5.3587	#N/A	#N/A	#N/A	#N/A	4.157	5.3587	64.8197	#N/A	80.9605	40.309	101.707	#N/A	#N/A	#N/A	#N/A	40.309	80.9605	101.707	#N/A	59.3861	27.59	31.1569	#N/A	#N/A	#N/A	#N/A	27.59	31.1569	59.3861	#N/A	37.2882	170.305	187.791	#N/A	#N/A	#N/A	#N/A	37.2882	170.305	187.791
Q2/1978	1978-06-30	#N/A	66.5033	4.25	5.39348	#N/A	#N/A	#N/A	#N/A	4.25	5.39348	66.5033	#N/A	83.3513	40.037	100.571	#N/A	#N/A	#N/A	#N/A	40.037	83.3513	100.571	#N/A	62.4762	27.415	30.674	#N/A	#N/A	#N/A	#N/A	27.415	30.674	62.4762	#N/A	37.5945	171.847	190.338	#N/A	#N/A	#N/A	#N/A	37.5945	171.847	190.338
Q3/1978	1978-09-30	#N/A	66.7839	4.501	5.41667	#N/A	#N/A	#N/A	#N/A	4.501	5.41667	66.7839	#N/A	84.112	40.463	103.43	#N/A	#N/A	#N/A	#N/A	40.463	84.112	103.43	#N/A	61.9933	27.631	30.8195	#N/A	#N/A	#N/A	#N/A	27.631	30.8195	61.9933	#N/A	37.9773	172.68	192.432	#N/A	#N/A	#N/A	#N/A	37.9773	172.68	192.432
Q4/1978	1978-12-31	#N/A	66.0357	4.58	5.42762	#N/A	#N/A	#N/A	#N/A	4.58	5.42762	66.0357	#N/A	83.8946	40.726	103.897	#N/A	#N/A	#N/A	#N/A	40.726	83.8946	103.897	#N/A	61.1243	27.319	31.794	#N/A	#N/A	#N/A	#N/A	27.319	31.794	61.1243	#N/A	38.2836	174.396	195.065	#N/A	#N/A	#N/A	#N/A	38.2836	174.396	195.065
Q1/1979	1979-03-31	#N/A	64.5391	4.688	5.22667	#N/A	#N/A	#N/A	#N/A	4.688	5.22667	64.5391	#N/A	84.2206	41.244	105.046	#N/A	#N/A	#N/A	#N/A	41.244	84.2206	105.046	#N/A	58.9033	27.118	29.9672	#N/A	#N/A	#N/A	#N/A	27.118	29.9672	58.9033	#N/A	38.0539	176.127	195.298	#N/A	#N/A	#N/A	#N/A	38.0539	176.127	195.298
Q2/1979	1979-06-30	#N/A	63.6973	4.688	5.23568	#N/A	#N/A	#N/A	#N/A	4.688	5.23568	63.6973	#N/A	88.2415	41.03	107.557	#N/A	#N/A	#N/A	#N/A	41.03	88.2415	107.557	#N/A	62.4762	26.866	33.5131	#N/A	#N/A	#N/A	#N/A	26.866	33.5131	62.4762	#N/A	39.3555	177.11	199.682	#N/A	#N/A	#N/A	#N/A	39.3555	177.11	199.682
Q3/1979	1979-09-30	#N/A	64.5391	4.838	5.25565	#N/A	#N/A	#N/A	#N/A	4.838	5.25565	64.5391	#N/A	86.3941	41.829	108.345	#N/A	#N/A	#N/A	#N/A	41.829	86.3941	108.345	#N/A	62.7658	26.913	32.4892	#N/A	#N/A	#N/A	#N/A	26.913	32.4892	62.7658	#N/A	38.8961	178.791	200.907	#N/A	#N/A	#N/A	#N/A	38.8961	178.791	200.907
Q4/1979	1979-12-31	#N/A	67.1581	4.757	5.29236	#N/A	#N/A	#N/A	#N/A	4.757	5.29236	67.1581	#N/A	86.3941	40.886	108.946	#N/A	#N/A	#N/A	#N/A	40.886	86.3941	108.946	#N/A	62.4762	27.255	32.6695	#N/A	#N/A	#N/A	#N/A	27.255	32.6695	62.4762	#N/A	39.2024	179.964	202.683	#N/A	#N/A	#N/A	#N/A	39.2024	179.964	202.683
Q1/1980	1980-03-31	#N/A	70.1512	4.745	5.31812	#N/A	#N/A	#N/A	#N/A	4.745	5.31812	70.1512	#N/A	84.9813	42.116	109.427	#N/A	#N/A	#N/A	#N/A	42.116	84.9813	109.427	#N/A	61.2208	27.733	34.5603	#N/A	#N/A	#N/A	#N/A	27.733	34.5603	61.2208	#N/A	39.0493	182.665	202.646	#N/A	#N/A	#N/A	#N/A	39.0493	182.665	202.646
Q2/1980	1980-06-30	#N/A	72.3025	4.704	5.33423	#N/A	#N/A	#N/A	#N/A	4.704	5.33423	72.3025	#N/A	81.7212	41.423	107.504	#N/A	#N/A	#N/A	#N/A	41.423	81.7212	107.504	#N/A	59.193	27.485	33.0942	#N/A	#N/A	#N/A	#N/A	27.485	33.0942	59.193	#N/A	38.743	182.838	203.944	#N/A	#N/A	#N/A	#N/A	38.743	182.838	203.944
Q3/1980	1980-09-30	#N/A	73.1443	4.647	5.32779	#N/A	#N/A	#N/A	#N/A	4.647	5.32779	73.1443	#N/A	78.787	41.205	106.342	#N/A	#N/A	#N/A	#N/A	41.205	78.787	106.342	#N/A	58.6136	27.224	31.7241	#N/A	#N/A	#N/A	#N/A	27.224	31.7241	58.6136	#N/A	38.5133	183.747	205.206	#N/A	#N/A	#N/A	#N/A	38.5133	183.747	205.206
Q4/1980	1980-12-31	#N/A	72.9572	4.559	5.33616	#N/A	#N/A	#N/A	#N/A	4.559	5.33616	72.9572	#N/A	77.0483	40.924	104.632	#N/A	#N/A	#N/A	#N/A	40.924	77.0483	104.632	#N/A	54.2683	26.922	30.5257	#N/A	#N/A	#N/A	#N/A	26.922	30.5257	54.2683	#N/A	38.3601	184.46	205.793	#N/A	#N/A	#N/A	#N/A	38.3601	184.46	205.793
Q1/1981	1981-03-31	#N/A	72.6766	4.466	5.30009	5.022	3.99854	#N/A	#N/A	4.23227	5.022	38.9884	#N/A	76.9396	40.956	105.54	50.544	49.6632	#N/A	#N/A	45.3096	50.544	91.2399	#N/A	55.2339	26.708	32.1954	19.301	15.0811	#N/A	#N/A	17.191	26.708	43.7147	#N/A	38.6664	185.966	208.892	157.593	120.153	#N/A	#N/A	79.4096	157.593	197.429
Q2/1981	1981-06-30	#N/A	73.1443	4.492	5.27819	5.132	3.9813	#N/A	#N/A	4.23665	5.132	39.2113	#N/A	77.3743	40.918	104.712	50.554	50.0928	#N/A	#N/A	45.5054	50.554	91.0432	#N/A	53.4958	26.767	32.7306	19.634	15.3538	#N/A	#N/A	17.4939	26.767	43.1132	#N/A	38.743	187.412	209.455	158.452	120.846	#N/A	#N/A	79.7943	158.452	198.434
Q3/1981	1981-09-30	#N/A	74.1732	4.62	5.30267	5.107	3.91009	#N/A	#N/A	4.26504	5.107	39.7379	#N/A	78.5697	41.385	105.206	49.946	48.9757	#N/A	#N/A	45.1804	49.946	91.888	#N/A	54.3649	26.813	31.0377	19.816	15.6608	#N/A	#N/A	17.7384	26.813	42.7013	#N/A	38.9727	188.705	210.704	159.405	120.052	#N/A	#N/A	79.5124	159.405	199.705
Q4/1981	1981-12-31	#N/A	76.0439	4.869	5.42182	5.28	4.08872	#N/A	#N/A	4.47886	5.28	40.7329	#N/A	79.4391	41.289	105.701	50.101	47.6642	#N/A	#N/A	44.4766	50.101	92.5698	#N/A	51.9508	27.073	29.5134	19.743	15.6757	#N/A	#N/A	17.7094	27.073	40.7321	#N/A	38.8961	189.05	211.611	161.286	120.791	#N/A	#N/A	79.8438	161.286	200.33
Q1/1982	1982-03-31	#N/A	78.5693	5.198	5.95705	5.116	3.99581	#N/A	#N/A	4.5559	5.198	42.2632	#N/A	78.787	41.089	105.353	50.41	46.7322	#N/A	#N/A	43.9106	50.41	92.0701	#N/A	56.3927	26.864	30.133	20.006	15.6876	#N/A	#N/A	17.8468	26.864	43.2628	#N/A	39.1258	191.126	209.761	159.878	120.237	#N/A	#N/A	79.6814	159.878	200.444
Q2/1982	1982-06-30	#N/A	81.0948	5.427	6.10196	5.081	4.08236	#N/A	#N/A	4.58168	5.427	43.5984	#N/A	80.0911	41.228	104.044	49.392	45.0495	#N/A	#N/A	43.1388	49.392	92.0676	#N/A	57.3583	26.974	29.9585	19.943	15.5758	#N/A	#N/A	17.7594	26.974	43.6584	#N/A	39.2024	192.324	209.48	160.487	119.79	#N/A	#N/A	79.4964	160.487	200.902
Q3/1982	1982-09-30	#N/A	81.2819	5.494	6.12837	4.976	4.04996	#N/A	#N/A	4.51298	5.494	43.7051	#N/A	80.0911	40.845	100.852	49.215	44.024	#N/A	#N/A	42.4345	49.215	90.4714	#N/A	58.6136	26.732	29.2691	19.885	14.9918	#N/A	#N/A	17.4384	26.732	43.9414	#N/A	39.4321	193.101	209.443	161.015	119.472	#N/A	#N/A	79.4521	161.015	201.272
Q4/1982	1982-12-31	#N/A	79.8788	5.394	6.08393	4.803	4.07962	#N/A	#N/A	4.44131	5.394	42.9814	#N/A	79.3304	41.318	99.8231	48.763	43.488	#N/A	#N/A	42.403	48.763	89.5767	#N/A	59.6758	26.263	29.6065	20.077	14.5878	#N/A	#N/A	17.3324	26.263	44.6412	#N/A	39.7384	194.751	211.011	161.613	118.72	#N/A	#N/A	79.2289	161.613	202.881
Q1/1983	1983-03-31	#N/A	75.7633	5.178	5.7123	5.123	4.00841	#N/A	#N/A	4.5657	5.178	40.7378	#N/A	81.0692	41.716	101.453	49.242	44.4998	#N/A	#N/A	43.1079	49.242	91.2609	#N/A	60.9311	26.401	29.7868	20.081	15.0408	#N/A	#N/A	17.5609	26.401	45.359	#N/A	40.2743	195.734	212.076	160.589	119.815	#N/A	#N/A	80.0448	160.589	203.905
Q2/1983	1983-06-30	#N/A	73.4249	5.014	5.65304	5.072	4.1843	#N/A	#N/A	4.59915	5.072	39.539	#N/A	81.9385	42.098	103.082	49.064	46.0058	#N/A	#N/A	44.0519	49.064	92.5105	#N/A	60.1586	26.039	30.005	20.08	15.2391	#N/A	#N/A	17.6596	26.039	45.0818	#N/A	40.4275	195.899	213.974	160.995	121.445	#N/A	#N/A	80.9361	160.995	204.937
Q3/1983	1983-09-30	#N/A	74.6409	4.932	5.68589	5.262	4.09947	#N/A	#N/A	4.51574	5.262	40.1634	#N/A	82.9166	42.088	103.002	50.517	48.2699	#N/A	#N/A	45.1789	50.517	92.9594	#N/A	62.4762	25.798	30.5984	20.044	14.8486	#N/A	#N/A	17.4463	25.798	46.5373	#N/A	40.8103	197.06	213.227	163.296	122.523	#N/A	#N/A	81.6668	163.296	205.144
Q4/1983	1983-12-31	#N/A	79.5982	4.966	5.7181	6.32	3.8894	#N/A	#N/A	4.4277	5.7181	42.9591	#N/A	84.112	42.08	105.687	51.041	49.912	#N/A	#N/A	45.996	51.041	94.8996	#N/A	63.1521	25.479	30.8195	19.768	14.71	#N/A	#N/A	17.239	25.479	46.9858	#N/A	41.1931	198.933	215.86	167.92	122.805	#N/A	#N/A	81.9989	167.92	207.397
Q1/1984	1984-03-31	#N/A	87.6422	5.085	5.95189	5.453	3.93083	#N/A	#N/A	4.50792	5.453	46.7971	#N/A	84.6553	42.404	107.023	50.811	51.1377	#N/A	#N/A	46.6075	51.1377	95.8391	#N/A	63.9246	25.466	30.4442	19.368	14.3687	#N/A	#N/A	16.8684	25.466	47.1844	#N/A	41.8057	199.734	218.542	168.217	125.517	#N/A	#N/A	83.6613	168.217	209.138
Q2/1984	1984-06-30	#N/A	93.2543	5.209	5.99634	5.649	3.97684	#N/A	#N/A	4.59292	5.649	49.6253	#N/A	81.9385	42.156	102.187	51.309	53.5163	#N/A	#N/A	46.7325	53.5163	92.063	#N/A	64.7937	25.125	29.9788	19.166	14.1334	#N/A	#N/A	16.6497	25.125	47.3862	#N/A	41.8822	201.464	218.91	169.254	127.616	#N/A	#N/A	84.7489	169.254	210.187
Q3/1984	1984-09-30	#N/A	94.1897	5.303	6.0279	5.514	4.02374	#N/A	#N/A	4.66337	5.514	50.1088	#N/A	81.1778	42.234	108.626	52.195	54.3655	#N/A	#N/A	47.2145	54.3655	94.9019	#N/A	65.373	24.844	30.1621	19.056	14.3642	#N/A	#N/A	16.7101	24.844	47.7676	#N/A	42.2651	203.242	221.126	171.255	128.425	#N/A	#N/A	85.3448	171.255	212.184
Q4/1984	1984-12-31	#N/A	91.3836	5.429	6.02274	4.859	3.99033	#N/A	#N/A	4.42467	5.429	48.7032	#N/A	82.2645	42.421	109.561	52.25	54.5883	#N/A	#N/A	47.3355	54.5883	95.9127	#N/A	64.504	24.7	31.0202	18.979	14.2153	#N/A	#N/A	16.5971	24.7	47.7621	#N/A	42.801	203.583	222.547	172.5	130.202	#N/A	#N/A	86.5015	172.5	213.065
Q1/1985	1985-03-31	#N/A	88.6711	5.494	5.62406	5.477	3.99033	#N/A	#N/A	4.73367	5.494	47.1476	#N/A	85.1987	42.567	110.362	52.379	55.4262	#N/A	#N/A	47.473	55.4262	97.7805	#N/A	65.373	24.377	27.1659	18.809	14.5938	#N/A	#N/A	16.7014	24.377	46.2695	#N/A	43.1073	203.748	223.465	172.703	131.82	#N/A	#N/A	87.4637	172.703	213.607
Q2/1985	1985-06-30	#N/A	88.5776	5.559	5.62406	5.415	4.03367	#N/A	#N/A	4.72434	5.559	47.1008	#N/A	88.5675	42.793	111.07	53.247	55.8534	#N/A	#N/A	48.02	55.8534	99.8189	#N/A	64.8902	24.722	29.6269	18.928	14.8068	#N/A	#N/A	16.8674	24.722	47.2585	#N/A	43.337	205.161	225.18	175.337	132.199	#N/A	#N/A	87.7681	175.337	215.17
Q3/1985	1985-09-30	#N/A	82.7784	5.605	5.61376	5.107	4.09228	#N/A	#N/A	4.59964	5.605	44.1961	#N/A	87.5895	43.149	112.981	53.802	56.2529	#N/A	#N/A	48.4755	56.2529	100.285	#N/A	63.828	25.16	30.1417	18.813	15.2286	#N/A	#N/A	17.0208	25.16	46.9849	#N/A	43.5667	205.994	228.046	177.239	133.381	#N/A	#N/A	88.4739	177.239	217.02
Q4/1985	1985-12-31	#N/A	87.4552	5.597	5.68525	5.615	4.43867	#N/A	#N/A	5.01783	5.615	46.5702	#N/A	87.0461	42.955	113.314	53.479	56.76	#N/A	#N/A	48.217	56.76	100.18	#N/A	65.373	25.343	29.6705	18.765	15.7621	#N/A	#N/A	17.2636	25.343	47.5218	#N/A	44.0261	207.176	229.025	179.431	137.229	#N/A	#N/A	90.6274	179.431	218.101
Q1/1986	1986-03-31	#N/A	86.2392	5.554	6.15027	5.556	4.25017	#N/A	#N/A	4.90209	5.556	46.1947	#N/A	87.5895	42.726	111.511	54.342	56.8152	#N/A	#N/A	48.534	56.8152	99.5503	#N/A	62.4762	25.474	27.5935	18.795	16.7977	#N/A	#N/A	17.7964	25.474	45.0349	#N/A	44.6387	208.458	229.785	179.332	136.724	#N/A	#N/A	90.6814	179.332	219.121
Q2/1986	1986-06-30	#N/A	86.5198	5.526	6.20373	5.618	4.46393	#N/A	#N/A	4.99497	5.618	46.3618	#N/A	88.8935	43.062	111.778	54.451	55.5573	#N/A	#N/A	48.7565	55.5573	100.336	#N/A	67.4009	25.929	29.0858	18.44	15.7531	#N/A	#N/A	17.0966	25.929	48.2433	#N/A	45.0981	210.476	232.81	181.183	138.176	#N/A	#N/A	91.6372	181.183	221.643
Q3/1986	1986-09-30	#N/A	87.8293	5.576	6.22756	5.744	4.65237	#N/A	#N/A	5.11418	5.744	47.0284	#N/A	89.2195	42.849	112.874	55.247	55.0095	#N/A	#N/A	48.9292	55.247	101.047	#N/A	69.3321	26.009	29.9934	18.5	15.169	#N/A	#N/A	16.8345	26.009	49.6627	#N/A	45.4809	211.609	234.059	182.797	139.269	#N/A	#N/A	92.3752	182.797	222.834
Q4/1986	1986-12-31	#N/A	87.3616	5.628	6.15542	5.343	4.47832	#N/A	#N/A	4.91066	5.628	46.7585	#N/A	90.8496	42.532	112.192	55.221	55.3876	#N/A	#N/A	48.8765	55.3876	101.521	#N/A	70.9737	26.042	30.9591	18.603	14.9723	#N/A	#N/A	16.7876	26.042	50.9664	#N/A	46.0169	212.747	236.52	184.382	139.294	#N/A	#N/A	92.6553	184.382	224.634
Q1/1987	1987-03-31	#N/A	85.3974	5.704	5.75867	5.577	4.29166	#N/A	#N/A	4.93433	5.704	45.578	#N/A	91.067	42.698	109.147	55.171	56.7927	#N/A	#N/A	48.9345	56.7927	100.107	#N/A	72.5187	25.799	25.1006	18.562	15.4954	#N/A	#N/A	17.0287	25.1006	49.1588	#N/A	46.17	213.146	234.892	185.255	140.855	#N/A	#N/A	93.5123	185.255	224.019
Q2/1987	1987-06-30	#N/A	85.1168	5.754	5.71037	5.718	4.17985	#N/A	#N/A	4.94511	5.718	45.4354	#N/A	92.045	43.034	111.778	56.89	56.9755	#N/A	#N/A	49.962	56.9755	101.912	#N/A	73.3878	26.021	29.3621	18.704	16.4819	#N/A	#N/A	17.593	26.021	51.3749	#N/A	46.9357	215.47	238.713	187.326	142.378	#N/A	#N/A	94.657	187.326	227.091
Q3/1987	1987-09-30	#N/A	84.6491	5.773	5.70457	5.995	4.24381	#N/A	#N/A	4.97419	5.773	45.3221	#N/A	93.5664	43.251	111.204	56.616	58.7348	#N/A	#N/A	49.9335	58.7348	102.385	#N/A	76.7675	26.466	29.7112	18.671	16.9722	#N/A	#N/A	17.8216	26.466	53.2393	#N/A	47.7013	216.759	240.452	188.02	144.381	#N/A	#N/A	96.0413	188.02	228.605
Q4/1987	1987-12-31	#N/A	84.462	5.734	5.74064	5.94	4.4549	#N/A	#N/A	5.09445	5.74064	45.201	#N/A	94.4358	43.834	113.034	57.604	60.4817	#N/A	#N/A	50.719	60.4817	103.735	#N/A	79.085	26.842	30.0225	18.597	16.9811	#N/A	#N/A	17.7891	26.842	54.5537	#N/A	48.0076	219.977	243.109	189.968	145.527	#N/A	#N/A	96.7673	189.968	231.543
Q1/1988	1988-03-31	#N/A	84.8362	5.681	6.05108	5.77	3.9218	#N/A	#N/A	4.8014	5.77	45.4436	#N/A	95.6312	44.581	111.137	59.582	62.2571	#N/A	#N/A	52.0815	62.2571	103.384	#N/A	80.8231	27.522	28.4604	18.795	16.6191	#N/A	#N/A	17.707	27.522	54.6417	#N/A	48.8499	222.39	243.513	192.656	147.756	#N/A	#N/A	98.3028	192.656	232.952
Q2/1988	1988-06-30	#N/A	84.9297	5.624	6.07169	5.757	4.22669	#N/A	#N/A	4.92534	5.757	45.5007	#N/A	96.2832	44.594	114.129	59.781	62.6685	#N/A	#N/A	52.1875	62.6685	105.206	#N/A	81.4025	27.976	29.4	19.041	16.8454	#N/A	#N/A	17.9432	27.976	55.4012	#N/A	49.003	224.103	247.346	193.633	149.405	#N/A	#N/A	99.204	193.633	235.725
Q3/1988	1988-09-30	#N/A	85.3039	5.642	6.10454	5.805	4.18157	#N/A	#N/A	4.91178	5.805	45.7042	#N/A	98.4566	45.264	115.706	60.541	62.3897	#N/A	#N/A	52.9025	62.3897	107.081	#N/A	81.9818	28.175	29.3011	19.179	17.0661	#N/A	#N/A	18.1226	28.175	55.6415	#N/A	49.6155	227.112	250.212	196.028	150.57	#N/A	#N/A	100.093	196.028	238.662
Q4/1988	1988-12-31	#N/A	86.7069	5.656	6.10068	5.558	4.26996	#N/A	#N/A	4.91398	5.656	46.4038	#N/A	98.7827	45.659	117.215	62.11	62.3783	#N/A	#N/A	53.8845	62.3783	107.999	#N/A	83.72	28.426	29.4552	19.379	17.2986	#N/A	#N/A	18.3388	28.426	56.5876	#N/A	50.0749	229.396	252.919	197.538	152.075	#N/A	#N/A	101.075	197.538	241.157
Q1/1989	1989-03-31	#N/A	89.3259	5.683	6.22627	5.798	4.21861	#N/A	#N/A	4.9508	5.798	47.7761	#N/A	98.8913	46.209	118.564	62.487	62.697	#N/A	#N/A	54.348	62.697	108.728	#N/A	85.265	28.508	32.0296	19.609	17.7323	#N/A	#N/A	18.6706	28.508	58.6473	#N/A	50.0749	233.634	254.143	199.014	153.208	#N/A	#N/A	101.642	199.014	243.889
Q2/1989	1989-06-30	#N/A	89.9806	5.786	6.196	5.738	4.49009	#N/A	#N/A	5.11404	5.786	48.0883	#N/A	98.8913	46.594	119.833	62.909	62.6905	#N/A	#N/A	54.6423	62.909	109.362	#N/A	86.6169	28.769	29.7927	19.685	17.5415	#N/A	#N/A	18.6132	28.769	58.2048	#N/A	50.3812	235.802	256.176	200.097	153.696	#N/A	#N/A	102.038	200.097	245.989
Q3/1989	1989-09-30	#N/A	90.3547	5.912	6.24946	5.902	4.54596	#N/A	#N/A	5.22398	5.912	48.3021	#N/A	99.5434	47.345	121.436	63.517	62.0304	#N/A	#N/A	54.6877	63.517	110.49	#N/A	86.3272	28.998	29.8828	20.095	17.8499	#N/A	#N/A	18.9725	28.998	58.105	#N/A	50.3812	238.409	258.319	201.682	154.049	#N/A	#N/A	102.215	201.682	248.364
Q4/1989	1989-12-31	#N/A	90.8224	6.121	6.42787	5.879	4.47653	#N/A	#N/A	5.17777	6.121	48.6251	#N/A	99.7607	48.233	122.371	64.783	62.2777	#N/A	#N/A	55.2554	64.783	111.066	#N/A	87.1962	29.431	30.3163	20.36	18.3044	#N/A	#N/A	19.3322	29.431	58.7562	#N/A	50.6109	240.337	261.063	203.34	154.21	#N/A	#N/A	102.411	203.34	250.7
Q1/1990	1990-03-31	#N/A	89.7	6.32	6.28553	6.038	4.89508	#N/A	#N/A	5.46654	6.28553	48.01	#N/A	99	48.37	124.094	63.82	61.6731	#N/A	#N/A	55.0215	63.82	111.547	#N/A	89.9	29.924	33.2222	20.35	18.3714	#N/A	#N/A	19.3607	29.924	61.5611	#N/A	51.3	241.672	265.729	205.518	156.282	#N/A	#N/A	103.791	205.518	253.7
Q2/1990	1990-06-30	#N/A	90.6	6.409	6.46973	6.093	4.73987	#N/A	#N/A	5.41644	6.409	48.5349	#N/A	100.4	49.14	123.947	64.218	61.6067	#N/A	#N/A	55.3733	64.218	112.174	#N/A	88.8	30.189	31.4129	20.375	18.3417	#N/A	#N/A	19.3584	30.189	60.1064	#N/A	51.3	242.152	269.317	205.445	155.146	#N/A	#N/A	103.223	205.445	255.735
Q3/1990	1990-09-30	#N/A	91.6	6.298	6.46393	6.192	4.64791	#N/A	#N/A	5.41996	6.298	49.032	#N/A	98.7	49.267	126.766	64.274	60.6144	#N/A	#N/A	54.9407	64.274	112.733	#N/A	87.1	30.309	31.1336	20.327	17.926	#N/A	#N/A	19.1265	30.309	59.1168	#N/A	51.1	243.209	275.146	205.859	154.972	#N/A	#N/A	103.036	205.859	259.178
Q4/1990	1990-12-31	#N/A	92	6.059	6.26105	4.718	4.65873	#N/A	#N/A	4.68837	6.059	49.1305	#N/A	97.8	49.347	128.743	63.61	58.7334	#N/A	#N/A	54.0402	63.61	113.271	#N/A	86.4	30.412	31.2587	20.412	17.1242	#N/A	#N/A	18.7681	30.412	58.8294	#N/A	51.2	244.77	279.898	205.388	154.131	#N/A	#N/A	102.666	205.388	262.334
Q1/1991	1991-03-31	#N/A	95.1	5.736	6.31	6.04	4.78862	#N/A	#N/A	5.26231	6.04	50.705	#N/A	96.7	49.35	134.5	63.711	57.5203	#N/A	#N/A	53.4352	63.711	115.6	#N/A	82.7	30.009	31.25	20.628	16.5891	#N/A	#N/A	18.6086	30.009	56.975	#N/A	51.3	244.884	289.72	207.506	152.376	#N/A	#N/A	101.838	207.506	267.302
Q2/1991	1991-06-30	#N/A	96.2	5.552	6.28	6.256	4.65784	#N/A	#N/A	5.10492	6.256	51.24	#N/A	95.6	49.501	131.18	63.459	57.9416	#N/A	#N/A	53.7213	63.459	113.39	#N/A	82.6	30.103	31.44	20.788	16.4416	#N/A	#N/A	18.6148	30.103	57.02	#N/A	51.4	247.241	288.05	208.573	153.858	#N/A	#N/A	102.629	208.573	267.645
Q3/1991	1991-09-30	#N/A	95.5	5.607	6.23	6.191	4.56499	#N/A	#N/A	5.086	6.191	50.865	#N/A	94.7	49.476	128.95	64.185	58.6007	#N/A	#N/A	54.0383	64.185	111.825	#N/A	81.9	30.328	31.88	20.958	16.4104	#N/A	#N/A	18.6842	30.328	56.89	#N/A	51.7	247.713	290.13	209.234	153.327	#N/A	#N/A	102.513	209.234	268.921
Q4/1991	1991-12-31	#N/A	95.4	5.847	6.23	6.696	4.6019	#N/A	#N/A	5.22445	6.23	51.048	#N/A	95.7	49.691	130.88	64.073	58.1238	#N/A	#N/A	53.9074	64.073	113.29	#N/A	80.8	30.362	32.59	20.992	16.6488	#N/A	#N/A	18.8204	30.362	56.695	#N/A	51.6	249.222	293.67	210.351	153.777	#N/A	#N/A	102.689	210.351	271.446
Q1/1992	1992-03-31	#N/A	99.5	6.272	6.14	6.308	4.37191	#N/A	#N/A	5.25596	6.272	52.904	#N/A	95.7	50.169	131.72	64.386	58.6979	#N/A	#N/A	54.4335	64.386	113.71	#N/A	78.9	31.107	33.5	20.874	15.7786	#N/A	#N/A	18.3263	31.107	56.2	#N/A	51.6	250.537	299.42	212.024	154.537	#N/A	#N/A	103.068	212.024	274.978
Q2/1992	1992-06-30	#N/A	98.5	6.547	6.1	6.489	4.20951	#N/A	#N/A	5.15475	6.489	52.5235	#N/A	95.3	50.045	127.91	64.316	58.9543	#N/A	#N/A	54.4997	64.316	111.605	#N/A	78.5	31.034	33.65	20.753	15.318	#N/A	#N/A	18.0355	31.034	56.075	#N/A	51.8	250.765	299.04	211.404	155.252	#N/A	#N/A	103.526	211.404	274.902
Q3/1992	1992-09-30	#N/A	98.1	6.656	6.08	6.868	4.35212	#N/A	#N/A	5.21606	6.656	52.484	#N/A	96.3	49.652	125.01	62.621	59.0158	#N/A	#N/A	54.3339	62.621	110.655	#N/A	78	30.903	33.45	20.496	15.2912	#N/A	#N/A	17.8936	30.903	55.725	#N/A	52.1	251.273	301.72	212.783	155.794	#N/A	#N/A	103.947	212.783	276.497
Q4/1992	1992-12-31	#N/A	95.5	6.573	6.06	6.275	4.25284	#N/A	#N/A	5.15642	6.275	51.0365	#N/A	96.7	49.417	122.74	61.966	59.8946	#N/A	#N/A	54.6558	61.966	109.72	#N/A	76.7	30.325	34.5	20.206	14.8189	#N/A	#N/A	17.5125	30.325	55.6	#N/A	52.6	251.583	301.95	212.172	156.469	#N/A	#N/A	104.535	212.172	276.767
Q1/1993	1993-03-31	#N/A	91.2	6.334	5.47	6.347	4.51173	#N/A	#N/A	4.99086	6.334	48.7735	#N/A	97	48.772	119.66	61.791	61.1876	#N/A	#N/A	54.9798	61.791	108.33	#N/A	76.9	29.727	33.43	19.976	14.7562	#N/A	#N/A	17.3661	29.727	55.165	#N/A	53.1	251.339	303.45	212.648	157.096	#N/A	#N/A	105.098	212.648	277.394
Q2/1993	1993-06-30	#N/A	88.2	6.107	5.44	6.403	4.59834	#N/A	#N/A	5.01917	6.107	47.3015	#N/A	97.3	48.627	117.12	61.255	62.0855	#N/A	#N/A	54.941	62.0855	107.21	#N/A	75.7	28.771	33.58	19.606	14.731	#N/A	#N/A	17.1685	28.771	54.64	#N/A	53.6	253.167	305.35	213.185	157.813	#N/A	#N/A	105.706	213.185	279.258
Q3/1993	1993-09-30	#N/A	88.6	6.044	5.48	6.457	4.63716	#N/A	#N/A	5.05858	6.044	47.5285	#N/A	98.4	48.662	117.21	61.261	62.3474	#N/A	#N/A	54.9615	62.3474	107.805	#N/A	75.5	28.086	34.22	19.319	14.7309	#N/A	#N/A	17.0249	28.086	54.86	#N/A	54	254.23	306.65	213.121	158.413	#N/A	#N/A	106.206	213.121	280.44
Q4/1993	1993-12-31	#N/A	87.8	6.009	5.47	6.615	4.6488	#N/A	#N/A	5.0594	6.009	47.2075	#N/A	99.6	48.693	118.5	62.206	63.1564	#N/A	#N/A	55.4495	63.1564	109.05	#N/A	75.2	27.592	33.44	19.123	14.8277	#N/A	#N/A	16.9754	27.592	54.32	#N/A	54.3	255.159	306.47	214.307	159.103	#N/A	#N/A	106.702	214.307	280.815
Q1/1994	1994-03-31	#N/A	85.5	6.063	3.95	6.574	4.59471	#N/A	#N/A	4.27236	6.063	46.037	#N/A	101	48.757	119.17	63.308	63.3347	#N/A	#N/A	56.0325	63.3347	110.085	#N/A	74.6	27.657	34.72	18.777	14.9038	#N/A	#N/A	16.8404	27.657	54.66	#N/A	55.1	256.943	308.81	216.613	161.063	#N/A	#N/A	108.082	216.613	282.877
Q2/1994	1994-06-30	#N/A	85.7	6.106	3.96	6.604	4.68037	#N/A	#N/A	4.32018	6.106	46.152	#N/A	103.2	49.912	119.96	65.688	65.7731	#N/A	#N/A	57.8	65.7731	111.58	#N/A	74.8	27.882	35.51	18.543	15.181	#N/A	#N/A	16.862	27.882	55.155	#N/A	55.5	258.867	310.15	216.109	162.958	#N/A	#N/A	109.229	216.109	284.509
Q3/1994	1994-09-30	#N/A	87.5	6.19	3.96	6.635	4.69481	#N/A	#N/A	4.32741	6.19	47.0675	#N/A	104	50.177	120.39	67.013	67.3774	#N/A	#N/A	58.595	67.3774	112.195	#N/A	74.6	27.818	35.55	18.418	15.3986	#N/A	#N/A	16.9083	27.818	55.075	#N/A	56.1	260.274	313.46	216.847	164.511	#N/A	#N/A	110.306	216.847	286.867
Q4/1994	1994-12-31	#N/A	88.9	6.277	3.98	6.384	4.68495	#N/A	#N/A	4.33248	6.277	47.642	#N/A	105.3	51.071	124.74	67.996	68.9505	#N/A	#N/A	59.5335	68.9505	115.02	#N/A	74.5	28.082	36.55	18.489	15.3643	#N/A	#N/A	16.9266	28.082	55.525	#N/A	56.4	262.34	315.58	219.01	165.94	#N/A	#N/A	111.17	219.01	288.96
Q1/1995	1995-03-31	#N/A	84	6.269	4	6.658	4.67044	#N/A	4.31637	4.23728	5.46972	25.9935	#N/A	104.2	51.97	121.35	68.469	70.3922	#N/A	31.4247	46.8337	69.4306	108.487	#N/A	73.6	28.394	34.52	18.487	15.0736	#N/A	19.98	17.6336	24.187	44.29	#N/A	56.9	263.077	316.83	222.157	166.503	#N/A	106.493	94.0949	194.33	276.515
Q2/1995	1995-06-30	#N/A	82.9	6.375	4.05	6.656	4.71741	#N/A	4.43064	4.33548	5.5462	25.717	#N/A	105.1	51.923	121.84	68.872	69.3967	#N/A	31.3312	46.775	69.1343	109.285	#N/A	74.2	28.386	35.42	18.554	14.5178	#N/A	20.0916	17.545	24.2388	45.115	#N/A	56.9	264.468	319.25	221.901	167.236	#N/A	107.519	94.8639	194.568	278.163
Q3/1995	1995-09-30	#N/A	84.3	6.464	4.08	6.515	4.74445	#N/A	4.79933	4.57834	5.63166	25.9612	#N/A	105.5	52.258	121.23	69.471	69.0531	#N/A	31.3015	47.0189	69.262	109.433	#N/A	74.4	28.072	34.61	18.811	14.424	#N/A	20.0063	17.7143	24.0391	44.5575	#N/A	57.5	265.164	322.46	222.883	168.037	#N/A	108.084	95.4382	195.46	279.488
Q4/1995	1995-12-31	#N/A	85	6.601	4.07	6.82	4.80306	#N/A	4.97484	4.6198	5.78792	26.365	#N/A	105.9	52.309	120.87	70.119	68.9275	#N/A	31.3652	47.073	69.5233	109.643	#N/A	74.8	27.824	33.73	19.568	14.5655	#N/A	19.6671	18.3174	23.7455	43.9975	#N/A	57.4	265.588	325.38	223.752	168.001	#N/A	109.092	96.1689	195.876	280.536
Q1/1996	1996-03-31	#N/A	82.6	6.727	4.19	6.764	4.79944	#N/A	5.34732	4.64708	6.03716	25.723	#N/A	106.6	52.826	117.15	70.207	69.3182	#N/A	32.3256	47.7009	69.7626	109.237	#N/A	74.7	27.396	30.56	19.046	14.6311	#N/A	19.8093	17.9423	23.6027	41.595	#N/A	58.1	267.422	324.58	225.633	167.845	#N/A	108.243	95.7075	196.739	281.712
Q2/1996	1996-06-30	#N/A	77.4	6.826	4.19	6.849	4.79046	#N/A	5.58091	4.64035	6.20345	24.4868	#N/A	106	53.09	118.38	68.987	69.5937	#N/A	32.0324	47.8256	69.2903	109.095	#N/A	75	27.091	33.95	19.418	15.0499	#N/A	19.7853	18.326	23.4381	44.2125	#N/A	58.6	268.345	328.73	225.612	168.065	#N/A	109.198	96.5484	196.839	283.441
Q3/1996	1996-09-30	#N/A	80.2	6.926	4.2	7.059	4.78499	#N/A	5.68319	4.63874	6.30459	25.3443	#N/A	106.4	53.066	118.8	68.507	70.855	#N/A	32.2703	47.8671	69.681	109.5	#N/A	76.2	26.835	33.43	19.207	15.485	#N/A	19.9231	18.2765	23.3791	44.1225	#N/A	58.9	270.4	330.45	226.287	168.879	#N/A	110.435	97.5515	197.583	285.413
Q4/1996	1996-12-31	#N/A	81.9	6.917	4.24	6.758	4.77239	#N/A	5.79241	4.63929	6.2752	25.6628	#N/A	107.5	53.06	120.54	67.888	71.0176	#N/A	32.4616	47.9104	69.4528	110.76	#N/A	76.2	26.518	33.28	18.828	15.5088	#N/A	19.6452	17.9982	23.0816	44.01	#N/A	59.5	271.366	333.98	227.36	170.338	#N/A	110.877	98.033	198.849	287.019
Q1/1997	1997-03-31	#N/A	81.9	6.865	4.32	6.974	4.555	#N/A	5.94645	4.49625	6.40573	25.7055	#N/A	108.1	53.201	120.39	67.905	72.073	#N/A	33.4559	48.2647	69.989	111.172	#N/A	76.3	26.27	31.28	18.496	15.382	#N/A	19.8421	17.7175	23.0561	42.535	#N/A	61.1	272.808	331.04	227.912	171.464	#N/A	110.913	98.4595	199.688	287.366
Q2/1997	1997-06-30	#N/A	83.4	6.829	4.18	6.902	4.589	#N/A	5.82776	4.48675	6.32838	26.0265	#N/A	107.5	54.319	121.68	69.547	72.94	#N/A	33.9106	49.2169	71.2435	111.045	#N/A	77.6	26.133	32.74	18.3	15.863	#N/A	19.9297	17.6908	23.0313	43.955	#N/A	61.8	275.749	335.32	230.791	173.257	#N/A	112.044	99.4831	202.024	290.642
Q3/1997	1997-09-30	#N/A	83	6.838	4.2	6.926	4.597	#N/A	5.92183	4.49775	6.37992	25.9445	#N/A	108.1	55.087	122.75	70.267	74.596	#N/A	34.1443	49.8513	72.4315	111.762	#N/A	76.6	25.963	32.28	18.402	16.355	#N/A	20.131	17.8903	23.047	43.36	#N/A	62	277.578	337.18	231.621	175.419	#N/A	113.423	100.567	203.52	292.478
Q4/1997	1997-12-31	#N/A	83.7	6.843	4.24	7.229	4.694	#N/A	6.2135	4.5805	6.52825	26.3468	#N/A	108.6	56.047	125.74	71.001	75.675	#N/A	34.2633	50.6011	73.338	112.885	#N/A	78.4	25.905	32.21	19.367	16.487	#N/A	20.3192	18.647	23.1121	43.7575	#N/A	62.4	280.51	340.18	234.912	176.654	#N/A	114.961	101.821	205.783	295.428
Q1/1998	1998-03-31	#N/A	85.2	6.94	4.11	7.175	4.907	#N/A	6.26653	4.70775	6.60327	26.6813	#N/A	109.6	56.899	124.08	70.555	76.186	#N/A	35.3257	51.5057	73.3705	113.22	#N/A	79.9	25.81	31.94	18.585	16.621	#N/A	20.6912	18.094	23.2506	43.93	#N/A	63.1	283.345	342.42	233.613	178.291	#N/A	114.784	101.863	205.952	298.114
Q2/1998	1998-06-30	#N/A	85.9	6.994	4.11	7.364	4.778	#N/A	6.14974	4.611	6.57187	26.998	#N/A	109.5	57.753	123.71	70.712	76.029	#N/A	35.6189	52.2195	73.3705	113.052	#N/A	77.6	25.91	31.19	18.56	16.607	#N/A	20.7524	18.0717	23.3312	42.7925	#N/A	64.2	285.331	342.49	234.528	179.678	#N/A	115.863	102.947	207.103	299.621
Q3/1998	1998-09-30	#N/A	86.1	7.095	4.14	7.424	4.82	#N/A	6.21161	4.65	6.6533	27.093	#N/A	109	58.057	123.41	69.987	75.619	#N/A	35.7676	52.4847	72.803	112.602	#N/A	77.6	26.165	30.8	18.535	16.512	#N/A	21.2404	18.0293	23.7027	42.5	#N/A	65.1	287.426	345.47	235.421	181.72	#N/A	117.524	104.418	208.57	301.937
Q4/1998	1998-12-31	#N/A	86.4	7.203	4.21	6.812	5.115	#N/A	6.04367	4.88875	6.42783	27.0023	#N/A	108.9	58.64	121.87	69.004	76.339	#N/A	35.7081	52.907	72.6715	112.143	#N/A	78.4	26.359	30.01	18.664	16.482	#N/A	21.4439	18.1185	23.9014	42.1075	#N/A	65.9	289.42	348.83	235.438	184.233	#N/A	119.451	106.063	209.836	304.273
Q1/1999	1999-03-31	#N/A	90.6	7.313	4.55	7.415	5.199	#N/A	5.96034	5.03675	6.63667	28.2112	#N/A	108.9	58.661	122.05	69.495	77.513	#N/A	36.813	53.199	73.504	112.188	#N/A	78.7	26.619	30.26	18.744	16.806	#N/A	21.7699	18.2595	24.1945	42.37	#N/A	66.2	291.608	348.93	235.897	186.917	#N/A	119.239	105.979	211.407	305.939
Q2/1999	1999-06-30	#N/A	91.3	7.394	4.52	7.543	5.16	#N/A	6.09418	5	6.74409	28.4822	#N/A	109.2	59.326	122.53	69.114	78.069	#N/A	37.1317	53.7774	73.5915	112.532	#N/A	78.7	26.839	30.42	18.714	17.08	#N/A	22.2929	18.3055	24.5659	42.49	#N/A	66.3	293.412	351.26	237.552	189.53	#N/A	120.901	107.251	213.541	307.874
Q3/1999	1999-09-30	#N/A	91.7	7.474	4.49	7.685	5.331	#N/A	6.20403	5.12075	6.83901	28.6887	#N/A	111.5	59.896	124.31	70.495	80.407	#N/A	37.5736	54.3154	75.451	114.703	#N/A	80	27.244	30.95	18.77	17.37	#N/A	22.4198	18.42	24.8319	43.2125	#N/A	67.5	296.711	354.23	238.95	191.707	#N/A	122.633	108.85	215.329	311.091
Q4/1999	1999-12-31	#N/A	91.8	7.472	4.41	7.783	5.318	#N/A	6.22676	5.091	6.84938	28.7873	#N/A	112.1	61.289	126.59	71.626	82.17	#N/A	37.8839	55.4377	76.898	115.722	#N/A	80	27.71	30.98	19.032	17.973	#N/A	22.7042	18.7673	25.2071	43.235	#N/A	68.8	300.06	357.27	242.475	194.496	#N/A	124.171	110.328	218.486	314.363
Q1/2000	2000-03-31	#N/A	92.3	7.476	4.38	7.722	5.331	#N/A	6.49128	5.09325	6.98364	28.8665	#N/A	112.2	62.133	129.15	71.797	83.646	#N/A	38.8655	56.3161	77.7215	116.438	#N/A	81.3	28.393	30.93	19.397	18.222	#N/A	22.98	19.1033	25.6865	43.5225	#N/A	69.5	302.22	360.17	246.145	196.977	#N/A	125.533	111.524	221.561	316.708
Q2/2000	2000-06-30	#N/A	92.8	7.4	4.34	7.601	5.383	#N/A	6.62512	5.12225	7.01256	28.9007	#N/A	112.6	62.677	132.24	73.256	84.922	#N/A	39.0652	56.774	79.089	117.51	#N/A	80.3	28.767	30.42	19.593	18.101	#N/A	23.3782	19.22	26.0726	42.89	#N/A	69.9	305.437	361.35	247.131	198.568	#N/A	127.424	113.043	222.85	319.415
Q3/2000	2000-09-30	#N/A	93.4	7.339	4.32	7.514	5.261	#N/A	6.58219	5.02575	6.96059	28.9855	#N/A	112.3	62.925	133.66	72.743	85.353	#N/A	39.1289	56.976	79.048	117.64	#N/A	78.5	28.989	29.96	20.047	18.231	#N/A	23.5029	19.593	26.246	42.095	#N/A	70.2	307.61	361.75	249.623	200.829	#N/A	129.528	114.696	225.226	321.145
Q4/2000	2000-12-31	#N/A	91.8	7.181	4.18	7.19	5.092	#N/A	6.59482	4.864	6.88791	28.3425	#N/A	112.6	63.701	133.93	73.942	85.593	#N/A	39.4264	57.6324	79.7675	117.933	#N/A	80	29.314	29.58	19.95	18.491	#N/A	23.7546	19.5852	26.5343	42.185	#N/A	70.2	310.318	363.04	254.129	202.304	#N/A	131.632	116.274	228.216	323.498
Q1/2001	2001-03-31	#N/A	87	7.039	4.13	7.321	5.119	#N/A	6.44267	4.87175	6.74084	27.2407	#N/A	112.1	64.082	135.24	73.222	83.442	#N/A	40.612	58.2145	78.332	117.885	#N/A	79.8	29.918	28.89	20.5	19.15	#N/A	24.4023	20.1625	26.6461	42.3885	#N/A	71.5	311.574	371.05	255.481	204.646	#N/A	131.72	116.665	230.064	326.443
Q2/2001	2001-06-30	#N/A	86.2	6.994	4.11	7.198	4.999	#N/A	6.35681	4.77675	6.6754	26.9485	#N/A	110.7	64.098	133.79	72.057	83.089	#N/A	40.5568	58.2127	77.573	116.472	#N/A	81.6	30.044	28.37	20.833	19.406	#N/A	24.9777	20.4763	26.6739	42.933	#N/A	72.4	312.231	372.53	255.607	205.53	#N/A	133.01	117.858	230.569	327.306
Q3/2001	2001-09-30	#N/A	87.6	7.13	4.14	7.275	4.894	#N/A	6.38585	4.7055	6.75793	27.3562	#N/A	110.7	64.348	133.15	71.26	81.514	#N/A	40.8245	58.4671	76.387	116.312	#N/A	81.4	30.021	28.15	20.863	19.771	#N/A	25.1287	20.59	26.6394	42.8658	#N/A	73	313.123	373.74	254.832	206.601	#N/A	134.743	119.307	230.716	328.277
Q4/2001	2001-12-31	#N/A	88.5	7.388	4.18	7.288	4.772	#N/A	6.71098	4.624	6.99949	27.666	#N/A	109.2	63.678	132.09	70.671	80.821	#N/A	40.6077	57.9104	75.746	114.922	#N/A	83	30.006	28.37	21.176	20.058	#N/A	25.1287	20.8965	26.7494	43.2545	#N/A	73.5	313.595	375.38	254.948	208.552	#N/A	136.069	120.427	231.75	329.041
Q1/2002	2002-03-31	#N/A	99.7	7.675	4.04	7.019	4.494	#N/A	6.74318	4.3805	6.88109	30.6813	#N/A	109.6	63.886	130.63	71.504	83.37	#N/A	40.901	58.1397	77.437	114.857	#N/A	83.9	30.06	28.16	21.219	20.071	#N/A	25.6407	20.932	26.9004	43.52	#N/A	73.5	314.337	376.03	254.557	210.545	#N/A	136.263	120.572	232.551	329.76
Q2/2002	2002-06-30	#N/A	99.7	7.758	4.12	7.027	4.612	#N/A	6.4856	4.489	6.7563	30.7435	#N/A	109.2	64.642	131.51	71.855	84.65	#N/A	41.2367	58.7907	78.2525	114.778	#N/A	84.4	29.908	27.24	20.628	20.343	#N/A	25.7064	20.5568	26.4732	43.531	#N/A	74.2	315.56	376.37	256.751	211.465	#N/A	137.801	121.901	234.108	330.762
Q3/2002	2002-09-30	#N/A	98	7.599	4.1	6.915	4.681	#N/A	6.50833	4.53575	6.71166	30.1992	#N/A	109.2	64.889	132.63	71.708	84.813	#N/A	41.2664	58.9834	78.2605	115.058	#N/A	87.4	29.748	27.18	21.645	20.455	#N/A	25.7042	21.3475	26.4421	44.161	#N/A	74.8	317.081	376.68	256.852	213.172	#N/A	138.968	122.926	235.012	331.981
Q4/2002	2002-12-31	#N/A	96.9	7.145	4.13	6.879	4.899	#N/A	6.38585	4.70675	6.63243	29.5838	#N/A	108.6	64.697	132.6	72.178	84.374	#N/A	41.4789	58.8925	78.276	114.6	#N/A	88.8	29.699	26.66	22.208	20.664	#N/A	25.7523	21.822	26.2062	44.4742	#N/A	75.6	317.885	376.39	257.006	214.839	#N/A	140.4	124.2	235.923	332.511
Q1/2003	2003-03-31	#N/A	95	6.504	4.14	6.857	5.099	#N/A	6.45593	4.85925	6.47996	28.8927	#N/A	108.1	65.71	132.38	70.979	84.73	#N/A	42.4223	59.8881	77.8545	114.17	#N/A	86.8	29.69	26	22.215	20.746	#N/A	25.923	21.8477	25.9615	43.9675	#N/A	76.6	317.969	370.97	257.022	216.188	#N/A	140.877	124.808	236.605	331.219
Q2/2003	2003-06-30	#N/A	95.2	6.201	4.2	6.633	5.083	#N/A	6.40605	4.86225	6.30353	28.7748	#N/A	107.9	65.244	131.58	70.418	84.114	#N/A	41.8741	59.4015	77.266	113.82	#N/A	89.1	29.689	26.14	22.182	20.917	#N/A	26.1024	21.8658	26.1212	44.5418	#N/A	77.5	317.893	369.8	257.007	216.886	#N/A	142.521	126.266	236.947	330.87
Q3/2003	2003-09-30	#N/A	94.1	6.239	4.24	6.495	5.036	#N/A	6.29747	4.837	6.26824	28.3962	#N/A	108.7	65.436	132.21	70.382	84.66	#N/A	42.3585	59.6666	77.521	114.578	#N/A	91.4	29.803	26.27	22.056	21.249	#N/A	26.1265	21.8543	26.1983	45.2023	#N/A	78.1	320.051	373.43	257.694	218.191	#N/A	143.529	127.172	237.942	333.396
Q4/2003	2003-12-31	#N/A	93.3	6.631	4.2	6.784	5.208	#N/A	6.75897	4.956	6.69499	28.413	#N/A	109.3	66.621	134.09	71.516	85.507	#N/A	42.5922	60.6138	78.5115	115.498	#N/A	93.8	29.898	25.71	22.167	21.575	#N/A	26.2031	22.019	25.9566	45.8735	#N/A	78.6	322.19	373.33	258.776	220.254	#N/A	144.819	128.265	239.515	334.975
Q1/2004	2004-03-31	#N/A	93.7	7.268	5.73	7.193	5.332	#N/A	6.62954	5.6305	6.91127	28.876	#N/A	109.7	67.015	135.06	71.648	85.655	#N/A	42.8642	60.9773	78.6515	116.04	#N/A	96.9	30.122	25.79	22.399	21.929	#N/A	25.9799	22.2815	25.8849	46.8165	#N/A	78.8	324.991	370.31	259.468	221.937	#N/A	145.88	129.11	240.703	336.321
Q2/2004	2004-06-30	#N/A	92.5	7.781	5.62	7.384	5.501	#N/A	6.4654	5.59025	6.9247	28.9607	#N/A	110	66.982	137.53	71.991	86.08	#N/A	42.6305	60.8941	79.0355	116.882	#N/A	95.2	30.273	25.25	22.473	22.209	#N/A	26.1965	22.407	25.7233	46.5048	#N/A	79.3	326.906	372.69	259.998	224.334	#N/A	147.772	130.654	242.166	338.352
Q3/2004	2004-09-30	#N/A	92.3	8.02	5.52	7.46	5.668	#N/A	6.1813	5.631	6.82065	29.09	#N/A	108.2	67.01	137.37	71.375	85.992	#N/A	43.2169	61.0617	78.6835	115.493	#N/A	94.6	30.31	24.6	22.543	22.558	#N/A	26.2447	22.5542	25.4223	46.3825	#N/A	79.7	328.455	372.36	260.978	226.348	#N/A	149.805	132.278	243.663	339.431
Q4/2004	2004-12-31	#N/A	90.4	7.93	5.46	7.937	5.671	#N/A	5.98749	5.61825	6.95875	28.5528	#N/A	109	67.275	136.17	71.827	86.294	#N/A	42.9279	61.1882	79.0605	115.792	#N/A	93.6	30.595	24.19	22.644	22.852	#N/A	26.411	22.8	25.3005	46.3462	#N/A	79.9	330.613	373.83	260.34	227.715	#N/A	151.449	133.562	244.028	341.417
Q1/2005	2005-03-31	31	100.6	7.579	4.09	6.966	5.547	#N/A	5.9635	5.547	6.966	31	554.5	108.2	67.566	137.04	71.468	86.434	#N/A	43.1447	67.566	86.434	137.04	195.7	94.3	30.835	23.74	22.663	23.165	#N/A	26.6954	23.165	26.6954	94.3	2767.6	80.9	331.231	374.25	260.976	229.299	#N/A	152.845	152.845	260.976	374.25
Q2/2005	2005-06-30	32.1	99.6	7.282	4.07	7.036	5.685	#N/A	5.79241	5.685	7.036	32.1	560.3	109.4	67.386	137.53	72.237	87.037	#N/A	43.6503	67.386	87.037	137.53	193.8	93.6	31.133	23.96	22.94	23.51	#N/A	26.9339	23.51	26.9339	93.6	2787.1	82	332.2	376.22	263.115	231.398	#N/A	154.701	154.701	263.115	376.22
Q3/2005	2005-09-30	32.3	99.8	7.172	4.02	7.326	5.845	#N/A	5.80945	5.80945	7.172	32.3	559.4	107.9	67.436	139.43	73.191	87.474	#N/A	44.1093	67.436	87.474	139.43	192.3	91.7	31.345	24.28	23.255	23.638	#N/A	27.0652	23.638	27.0652	91.7	2814.2	83.8	334.172	378.31	263.829	233.674	#N/A	156.257	156.257	263.829	378.31
Q4/2005	2005-12-31	32	98.1	7.177	3.93	7.247	5.682	#N/A	5.66993	5.66993	7.177	32	566	108.5	67.995	140.98	73.788	88.46	#N/A	44.3897	67.995	88.46	140.98	191	91.5	31.377	23.8	23.421	23.866	#N/A	27.2075	23.8	27.2075	91.5	2825.5	85.6	336.757	380.01	263.901	236.277	#N/A	158.608	158.608	263.901	380.01
Q1/2006	2006-03-31	31.9	94.4	7.246	3.87	7.06	5.696	#N/A	6.02537	5.696	7.06	31.9	582.6	109.4	68.391	143.82	74.307	88.622	#N/A	44.6065	68.391	88.622	143.82	194.4	92.4	31.394	22.69	23.435	24.282	#N/A	27.2162	23.435	27.2162	92.4	2852.5	85.5	340.023	382.78	265.039	239.239	#N/A	160.5	160.5	265.039	382.78
Q2/2006	2006-06-30	35.9	93.1	7.323	3.81	7.035	5.669	#N/A	6.19393	5.669	7.035	35.9	588.2	108.9	69.209	146.91	75.556	87.546	#N/A	44.8402	69.209	87.546	146.91	190.9	93.1	31.838	23.86	23.388	24.424	#N/A	27.4985	23.86	27.4985	93.1	2860	85.6	343.273	387.16	266.295	241.013	#N/A	162.551	162.551	266.295	387.16
Q3/2006	2006-09-30	33.5	94.3	7.368	3.75	7.099	5.552	#N/A	6.18888	5.552	7.099	33.5	593	109.1	68.937	148.75	76.099	86.78	#N/A	45.4266	68.937	86.78	148.75	186.8	93.4	32.064	24.42	23.268	24.536	#N/A	27.6057	24.42	27.6057	93.4	2863.4	85.5	343.398	392.31	266.857	242.239	#N/A	164.46	164.46	266.857	392.31
Q4/2006	2006-12-31	31.2	92.4	7.351	3.73	7.212	5.498	#N/A	6.20151	5.498	7.212	31.2	601	109.2	69.243	150.66	77.372	86.322	#N/A	45.6901	69.243	86.322	150.66	181.4	95.1	32.497	25.16	24.477	24.796	#N/A	27.6867	24.796	27.6867	95.1	2883.4	85.8	346.048	396.12	268.944	244.394	#N/A	166.422	166.422	268.944	396.12
Q1/2007	2007-03-31	30	90	7.275	4.86	7.18	5.52	#N/A	6.53548	5.52	7.18	30	597.9	109.5	70.119	151.11	77.05	87.117	#N/A	45.4309	70.119	87.117	151.11	181.3	96.3	33.136	24.44	24.2	25.145	#N/A	27.4197	24.44	27.4197	96.3	2889.4	86.8	348.748	398.84	270.274	246.075	#N/A	169.781	169.781	270.274	398.84
Q2/2007	2007-06-30	28.8	90	7.231	4.76	7.159	5.378	#N/A	6.55694	5.378	7.159	28.8	610.7	109.6	70.614	153.96	76.889	87.291	#N/A	45.7241	70.614	87.291	153.96	184.2	95.8	33.412	23.36	23.702	25.518	#N/A	27.6276	23.702	27.6276	95.8	2898.4	87.7	351.516	402.56	270.655	248.969	#N/A	171.478	171.478	270.655	402.56
Q3/2007	2007-09-30	27.2	90	7.245	4.7	7.049	5.561	#N/A	6.62576	5.561	7.049	27.2	618.5	109.1	70.339	156.61	77.892	86.809	#N/A	46.2128	70.339	86.809	156.61	182.1	94.4	33.527	23.66	23.322	25.734	#N/A	27.7085	23.66	27.7085	94.4	2916.1	88.7	353.203	405.17	270.485	250.846	#N/A	173.051	173.051	270.485	405.17
Q4/2007	2007-12-31	28.3	90.7	7.301	4.69	7.064	5.681	#N/A	6.6529	5.681	7.064	28.3	616.6	109.7	69.916	157.41	76.938	85.43	#N/A	46.3997	69.916	85.43	157.41	177.6	95.5	33.559	24.24	23.146	25.699	#N/A	27.7961	24.24	27.7961	95.5	2934.1	89.4	354.817	406.19	271.424	252.151	#N/A	175.084	175.084	271.424	406.19
Q1/2008	2008-03-31	31.1	100.1	7.413	5.79	7.172	5.785	#N/A	6.54558	5.79	7.172	31.1	594.6	109.3	69.347	155.74	78.895	84.492	#N/A	45.9791	69.347	84.492	155.74	169.8	96.5	33.581	24.63	23.888	26.29	#N/A	27.9799	24.63	27.9799	96.5	2937.2	89.9	357.925	411.09	272.647	252.831	#N/A	176.127	176.127	272.647	411.09
Q2/2008	2008-06-30	29.7	97.4	7.468	5.71	7.283	5.954	#N/A	6.47613	5.954	7.283	29.7	613.7	108.5	68.234	155.32	77.786	84.646	#N/A	46.149	68.234	84.646	155.32	168.1	95.5	33.135	23.42	23.101	26.194	#N/A	28.1593	23.42	28.1593	95.5	2936.5	89.3	357.472	411.3	271.098	253.889	#N/A	176.746	176.746	271.098	411.3
Q3/2008	2008-09-30	28.8	95.6	7.65	5.68	7.149	6.09	#N/A	6.36502	6.09	7.149	28.8	599.9	107.2	67.432	153.29	74.828	84.772	#N/A	45.9323	67.432	84.772	153.29	166.7	92.8	32.663	23.29	22.759	26.257	#N/A	27.4766	23.29	27.4766	92.8	2928.1	88.1	357.425	411.27	269.466	255.216	#N/A	176.092	176.092	269.466	411.27
Q4/2008	2008-12-31	32.5	92.4	7.801	5.66	7.179	6.068	#N/A	6.26906	6.068	7.179	32.5	584.9	102.3	64.949	142.92	69.698	81.651	#N/A	44.2198	64.949	81.651	142.92	157.6	87.2	32.196	23.39	21.765	26.083	#N/A	27.1703	23.39	27.1703	87.2	2863.8	87	353.973	408.23	266.827	253.733	#N/A	175.986	175.986	266.827	408.23
Q1/2009	2009-03-31	32.8	91.6	8.022	5.57	7.08	5.882	#N/A	6.26779	5.882	7.08	32.8	563.2	97.4	62.559	126.67	63.759	76.769	#N/A	40.9434	62.559	76.769	126.67	146.2	81	31.64	23.08	21.588	24.439	#N/A	26.8574	23.08	26.8574	81	2852.5	86.2	349.527	397.88	262.783	252.318	#N/A	175.155	175.155	262.783	397.88
Q2/2009	2009-06-30	33	90.4	8.137	5.54	7.038	5.517	#N/A	6.2135	5.54	7.038	33	558.5	97.6	63.032	126.5	61.823	72.815	#N/A	40.8415	61.823	72.815	126.5	144.2	80	31.115	23.03	21.319	24.107	#N/A	26.0762	23.03	26.0762	80	2854.1	85.9	349.107	397.42	262.176	252.692	#N/A	174.041	174.041	262.176	397.42
Q3/2009	2009-09-30	36.9	90.2	8.137	5.51	7.131	5.455	#N/A	6.16994	5.51	7.131	36.9	565	96.6	63.983	130.57	62.87	72.807	#N/A	40.9902	62.87	72.807	130.57	146.2	81.4	30.75	23.05	20.716	24.475	#N/A	25.0543	23.05	25.0543	81.4	2855.2	86.1	349.742	397.35	263.669	253.822	#N/A	174.36	174.36	263.669	397.35
Q4/2009	2009-12-31	35.1	90.3	8.034	5.47	7.066	5.535	#N/A	6.07272	5.535	7.066	35.1	581.2	97.5	64.488	132.03	64.566	74.207	#N/A	41.2707	64.488	74.207	132.03	140.8	80.4	30.5	22.89	20.596	25.362	#N/A	24.4154	22.89	25.362	80.4	2874.2	86.3	352.39	400.32	263.629	255.36	#N/A	174.678	174.678	263.629	400.32
Q1/2010	2010-03-31	34	89.5	7.825	4.18	7.11	5.602	#N/A	6.26527	5.602	7.11	34	586	99.2	64.243	143.04	65.581	76.72	#N/A	41.8273	64.243	76.72	143.04	136.4	84.3	30.203	23.82	20.38	26.257	#N/A	22.7174	22.7174	26.257	84.3	2884.1	86.3	354.397	397.14	264.104	257.668	#N/A	175.845	175.845	264.104	397.14
Q2/2010	2010-06-30	36	89.6	7.733	4.17	7.056	5.639	#N/A	6.27158	5.639	7.056	36	588.4	100.3	64.478	147.42	67.084	78.699	#N/A	42.5072	64.478	78.699	147.42	139.2	88.4	30.132	25.65	20.376	26.482	#N/A	22.1769	22.1769	26.482	88.4	2908.2	86.9	356.467	398.95	264.738	258.268	#N/A	176.516	176.516	264.738	398.95
Q3/2010	2010-09-30	35.9	90.8	7.764	4.14	7.068	5.686	#N/A	6.29873	5.686	7.068	35.9	593.1	100.6	64.448	150.03	67.967	79.201	#N/A	42.5412	64.448	79.201	150.03	138.2	90.1	30.285	25.16	20.241	26.736	#N/A	21.6802	21.6802	26.736	90.1	2931.9	87.5	358.529	401.93	266.058	259.851	#N/A	177.347	177.347	266.058	401.93
Q4/2010	2010-12-31	34.5	90.9	7.899	4.21	7.183	5.712	#N/A	6.41742	5.712	7.183	34.5	597.9	101.6	65.02	154.22	68.671	80.363	#N/A	43.1022	65.02	80.363	154.22	137.9	87.7	30.249	24.13	20.002	27.002	#N/A	20.9537	20.9537	27.002	87.7	2952.1	87.8	361.061	402.8	267.901	262.68	#N/A	177.418	177.418	267.901	402.8
Q1/2011	2011-03-31	34.8	100.6	8.098	3.76	7.169	5.864	#N/A	6.61565	5.864	7.169	34.8	587.5	100.9	66.442	155.9	68.857	81.135	#N/A	42.9704	66.442	81.135	155.9	134.3	89.1	30.003	25.41	19.827	27.343	#N/A	20.1507	20.1507	27.343	89.1	2948.6	88.4	364.587	411.91	268.604	264.854	#N/A	177.648	177.648	268.604	411.91
Q2/2011	2011-06-30	32.4	100.6	8.179	3.73	7.121	5.9	#N/A	6.60997	5.9	7.121	32.4	595.1	99.9	66.335	156.23	69.083	81.209	#N/A	42.3288	66.335	81.209	156.23	137.2	90.1	29.915	25.7	19.318	27.275	#N/A	19.4352	19.4352	27.275	90.1	2963.2	88.5	365.481	411.16	269.291	265.436	#N/A	178.16	178.16	269.291	411.16
Q3/2011	2011-09-30	32.6	100	8.18	3.74	7.247	5.894	#N/A	6.53043	5.894	7.247	32.6	596.9	99.4	66.323	158.5	68.483	83.65	#N/A	42.248	66.323	83.65	158.5	138	89.5	29.476	25.39	19.041	27.818	#N/A	18.7087	19.041	27.818	89.5	2969.8	88.7	367.137	413.08	268.029	267.677	#N/A	178.266	178.266	268.029	413.08
Q4/2011	2011-12-31	34.3	98.8	8.019	3.74	7.423	5.922	#N/A	6.61755	5.922	7.423	34.3	611.9	99	66.83	157.16	67.561	84	#N/A	42.0653	66.83	84	157.16	139.1	89.4	29.22	26.19	18.933	28.203	#N/A	18.0238	18.933	28.203	89.4	2990.7	88.8	368.431	413.38	266.207	269.367	#N/A	177.718	177.718	269.367	413.38
Q1/2012	2012-03-31	32.4	94.6	7.731	3.74	7.1	5.796	#N/A	6.07208	5.796	7.1	32.4	607.3	98.5	67.079	157.34	67.363	83.351	#N/A	41.1559	67.079	83.351	157.34	141.7	86.4	28.61	25.72	18.456	29.043	#N/A	18.2207	18.456	28.61	86.4	3016.2	90.1	369.897	416.13	264.625	270.476	#N/A	176.711	176.711	270.476	416.13
Q2/2012	2012-06-30	31.9	92.9	7.496	3.72	7.206	5.833	#N/A	5.84102	5.833	7.206	31.9	611.2	97.3	66.943	157.95	66.768	82.958	#N/A	40.6715	66.768	82.958	157.95	142	83	28.163	25.75	17.907	29.776	#N/A	17.6321	17.907	28.163	83	3026.9	90.3	370.723	416.6	262.599	271.433	#N/A	175.721	175.721	271.433	416.6
Q3/2012	2012-09-30	29.6	92.8	7.316	3.71	6.913	5.958	#N/A	5.9212	5.9212	6.913	29.6	605.2	97.5	67.409	158.38	67.009	81.625	#N/A	39.9533	67.009	81.625	158.38	141.6	81.7	27.927	25.57	17.723	30.031	#N/A	17.1201	17.723	27.927	81.7	3038.4	91.6	371.526	417.83	261.405	272.985	#N/A	175.084	175.084	272.985	417.83
Q4/2012	2012-12-31	29.2	92.2	7.193	3.68	6.99	6.238	#N/A	5.98685	5.98685	6.99	29.2	602.4	95.2	67.023	155.01	65.419	81.691	#N/A	39.5794	65.419	81.691	155.01	143.9	82.3	27.907	25.22	17.544	30.557	#N/A	16.6365	17.544	27.907	82.3	3039.7	91.7	371.958	417.82	261.25	272.665	#N/A	173.617	173.617	272.665	417.82
Q1/2013	2013-03-31	33.2	92	7.115	3.9	7.203	6.717	#N/A	6.53863	6.53863	7.115	33.2	619.9	95.5	66.85	155.56	65.142	82.848	#N/A	38.8952	65.142	82.848	155.56	145.6	82.1	28.207	24.15	17.083	30.854	#N/A	16.0566	17.083	28.207	82.1	3039	92.1	371.546	418.37	258.733	274.561	#N/A	174.13	174.13	274.561	418.37
Q2/2013	2013-06-30	35.7	92.7	7.142	3.89	7.124	7.035	#N/A	6.81831	6.81831	7.124	35.7	618.1	96.2	67.92	156.16	65.079	82.935	#N/A	38.5298	65.079	82.935	156.16	145.3	83.4	28.393	24.78	17.151	31.068	#N/A	15.6278	17.151	28.393	83.4	3042.1	92.2	373.451	421.09	258.821	276.742	#N/A	174.342	174.342	276.742	421.09
Q3/2013	2013-09-30	37.9	94.1	7.321	3.9	7.079	7.243	#N/A	6.69962	6.69962	7.243	37.9	619.4	96.8	67.655	156.91	65.177	84.133	#N/A	38.7422	65.177	84.133	156.91	147.2	85.8	28.355	25.24	17.1	31.321	#N/A	15.4265	17.1	28.355	85.8	3065.4	92.8	373.843	423.07	260.214	278.751	#N/A	174.13	174.13	278.751	423.07
Q4/2013	2013-12-31	37.1	95.2	7.594	3.92	7.198	7.07	#N/A	6.99508	6.99508	7.198	37.1	624.1	97.2	67.878	159.55	64.917	85.692	#N/A	38.8485	64.917	85.692	159.55	146.8	87	28.19	25.55	16.662	31.357	#N/A	15.1639	16.662	28.19	87	3096	93.2	375.658	424.09	260.206	281.238	#N/A	174.43	174.43	281.238	424.09
Q1/2014	2014-03-31	35.2	102	7.981	3.41	7.039	6.622	#N/A	6.84861	6.622	7.039	35.2	619.4	97.4	67.794	165.39	65.503	86.467	#N/A	38.9122	65.503	86.467	165.39	147.3	89.2	27.825	26.09	16.437	31.547	#N/A	15.1289	16.437	27.825	89.2	3089.5	94.1	376.521	423.97	260.88	281.71	#N/A	175.544	175.544	281.71	423.97
Q2/2014	2014-06-30	35.5	104.5	8.302	3.44	7.006	6.452	#N/A	6.67184	6.452	7.006	35.5	628.2	97.8	68.08	164.09	65.176	88.954	#N/A	39.2267	65.176	88.954	164.09	149	91.1	27.559	25.53	16.123	31.764	#N/A	15.2667	16.123	27.559	91.1	3121.1	95.1	377.459	422.98	261.099	284.045	#N/A	175.827	175.827	284.045	422.98
Q3/2014	2014-09-30	35.4	105.6	8.538	3.45	7.087	6.341	#N/A	6.7697	6.341	7.087	35.4	640	98.1	68.287	164.9	64.913	88.205	#N/A	39.6474	64.913	88.205	164.9	149	93.7	27.413	25.51	15.881	32.144	#N/A	15.3127	15.881	27.413	93.7	3161.9	96	379.288	424.85	262.443	286.145	#N/A	176.64	176.64	286.145	424.85
Q4/2014	2014-12-31	36.8	107.4	8.639	3.45	6.808	6.383	#N/A	6.43636	6.383	6.808	36.8	644	98.3	67.711	167.2	64.869	88.89	#N/A	40.2933	64.869	88.89	167.2	150.4	94.1	27.329	25.38	15.844	32.44	#N/A	15.3477	15.844	27.329	94.1	3173.1	97	380.123	427.13	262.54	287.828	#N/A	177.789	177.789	287.828	427.13
Q1/2015	2015-03-31	37.1	106	8.646	3.95	7.122	6.544	#N/A	6.67689	6.544	7.122	37.1	648.8	98.8	68.118	167.29	64.896	87.82	#N/A	40.0808	64.896	87.82	167.29	151.7	95.1	27.494	25.51	15.87	31.182	#N/A	15.665	15.87	27.494	95.1	3199.3	97.2	381.068	427.57	262.795	288.699	#N/A	179.804	179.804	288.699	427.57
Q2/2015	2015-06-30	37.6	107	8.55	3.96	7.174	6.663	#N/A	6.88712	6.663	7.174	37.6	641.5	99.5	67.804	168.12	65.583	86.67	#N/A	40.3613	65.583	86.67	168.12	156.8	96.3	27.348	25.39	15.845	30.61	#N/A	15.9669	15.9669	27.348	96.3	3223.1	97.9	381.219	428.81	263.329	290	#N/A	180.971	180.971	290	428.81
Q3/2015	2015-09-30	39.5	106.3	8.335	4	7.355	6.733	#N/A	6.90859	6.733	7.355	39.5	643.1	99.2	68.185	168.75	65.712	87.77	#N/A	40.7565	65.712	87.77	168.75	159.3	95.7	27.335	25.4	15.836	30.333	#N/A	16.0304	16.0304	27.335	95.7	3231.5	98.3	382.611	429.86	264.127	291.778	#N/A	182.58	182.58	291.778	429.86
Q4/2015	2015-12-31	39.4	104.6	7.977	4	7.571	6.847	#N/A	7.21289	6.847	7.571	39.4	633.3	98.6	68.31	168.04	65.703	87.006	#N/A	41.4024	65.703	87.006	168.04	159.7	97.2	27.311	25.62	15.969	29.934	#N/A	16.2448	16.2448	27.311	97.2	3246.7	98.9	384.171	431.11	264.993	293.297	#N/A	183.694	183.694	293.297	431.11
Q1/2016	2016-03-31	41.5	100.7	7.571	3.95	7.324	6.932	#N/A	7.4509	6.932	7.4509	41.5	638.1	98.7	68.739	170.8	66.885	87.36	#N/A	42.299	66.885	87.36	170.8	163.4	97.5	27.104	25.89	16.009	29.788	#N/A	16.2361	16.2361	27.104	97.5	3245.3	99.3	387.535	433.87	265.255	295.337	#N/A	184.171	184.171	295.337	433.87
Q2/2016	2016-06-30	42.8	99.7	7.309	3.96	7.369	6.947	#N/A	7.53423	6.947	7.369	42.8	631.5	100.5	68.735	170.07	66.504	85.042	#N/A	42.8557	66.504	85.042	170.07	161.3	99.2	26.93	25.96	15.983	29.407	#N/A	16.363	16.363	26.93	99.2	3269.6	99.4	386.756	437.41	266.254	296.524	#N/A	185.02	185.02	296.524	437.41
Q3/2016	2016-09-30	42.9	99.5	7.208	3.95	7.4	6.989	#N/A	7.51782	6.989	7.4	42.9	633	100.1	68.642	171.32	67.187	88.258	#N/A	43.1787	67.187	88.258	171.32	161.8	100.2	26.803	25.98	15.95	29.326	#N/A	16.6562	16.6562	26.803	100.2	3294.9	100.2	388.021	438.23	266.718	297.737	#N/A	186.222	186.222	297.737	438.23
Q4/2016	2016-12-31	42.5	100.1	7.281	3.96	7.189	6.963	#N/A	7.45595	6.963	7.281	42.5	633	100.7	69.097	171.4	68.178	89.133	#N/A	43.3996	68.178	89.133	171.4	161.7	103.1	27.078	25.83	16.016	29.558	#N/A	16.8575	16.8575	27.078	103.1	3313.2	101	389.887	440.24	267.498	299.312	#N/A	187.247	187.247	299.312	440.24
Q1/2017	2017-03-31	39.4	102.1	7.482	3.93	7.178	6.977	#N/A	7.39597	6.977	7.39597	39.4	639.1	101	69.282	172.76	68.495	90.393	#N/A	44.2623	68.495	90.393	172.76	163.2	106.4	27.321	26.47	16.146	30.102	#N/A	17.096	17.096	27.321	106.4	3319.7	101.4	392.88	444.4	268.96	301.862	#N/A	188.396	188.396	301.862	444.4
Q2/2017	2017-06-30	38.3	102.7	7.673	3.91	7.03	6.986	#N/A	7.34547	6.986	7.34547	38.3	650	101.1	69.601	174.83	69.436	92.018	#N/A	44.6362	69.436	92.018	174.83	162.3	106.9	27.611	26.77	16.081	30.49	#N/A	17.4308	17.4308	27.611	106.9	3341.5	101.6	395.226	446.51	269.31	304.935	#N/A	189.793	189.793	304.935	446.51
Q3/2017	2017-09-30	38.1	103.5	7.786	3.9	6.917	6.993	#N/A	7.45532	6.917	7.45532	38.1	653.6	102.2	70.189	178.06	70.468	92.985	#N/A	44.9167	70.189	92.985	178.06	161.8	107.3	27.796	26.74	16.205	30.911	#N/A	17.6627	17.6627	27.796	107.3	3374.4	102	397.816	449.27	269.496	306.4	#N/A	190.942	190.942	306.4	449.27
Q4/2017	2017-12-31	37.9	103.2	7.851	3.9	6.885	6.985	#N/A	7.48878	6.885	7.48878	37.9	663.7	103	70.94	180.7	70.993	93.313	#N/A	45.5456	70.94	93.313	180.7	165.1	107.7	27.859	27.01	16.331	31.274	#N/A	17.9997	17.9997	27.859	107.7	3389.9	102.3	400.74	450.48	270.068	308.323	#N/A	191.932	191.932	308.323	450.48

[truncated: 1 more sheets: DataTransformed]
