# Supplementary material for: Modeling time-variation over the business cycle (1960–2017): an international perspective
Source: publisher site journal article supplement (doi:10.1515/snde-2017-0101), 2018-11-22
Supplement: Supplementary file 23 [file RGDPG8_cycles.xlsx]

## Sheet: README
Modeling Time-Variation Over the Business Cycle (1960-2017): An International Perspective
Enrique Martinez-Garcia
Federal Reserve Bank of Dallas and SMU
emg.economics@gmail.com
Date: 10/1/2018
INSTRUCTIONS :
This excel file plots classical cycles (peak-to-trough) for real GDP (RGDP) for all countries for which there is data during the post-WWII period using matlab code for dating the cycle.
> The original data comes from the OECD - Quarterly National Accounts (Obtained via Haver Analytics)
>> The data used to determine the classical cycles constitutes a balanced panel and can be found summarizes in the spreadsheet DATA.
> The classical cycles are computed with Harding and Pagan's (2002) variant of the Bry-Boschan business cycle dating methodology.
>> The turning points are determined by the following rule (which can be modified if necessary):
peak : must be greater than 'turnphase' (2 quarters for real GDP) on either side.
trough : must be smaller than 'turnphase' (2 quarters for real GDP) on either side.
A turning point must meet some additional criteria (restrictions):
Each 'phase' (contraction/expansion) lasts at least 2 quarters for real GDP.
Each full 'cycle' phase (contraction & expansion) lasts at least 4 quarters for real GDP.
Troughs and peaks must alternate : if there are two peaks (troughs) in a row, it will select the highest (lowest).
Each trough must be lower than the preceeding peak.
There are no turning points within 'phase' length end points (2 quarters for real GDP).
>> The classical cycles are computed with the matlab codes HPdatingRGDP_balanced.m and/or HPdatingRGDP_unbalanced.m (created with Matlab R2012a (7.14.0.739)).
HPdatingRGDP_balanced.m -- if the original data does not form a balanced panel, then only the time series span for which all series are complete will be included. (NOT USED WITH THIS BALANCED-PANEL DATASET).
HPdatingRGDP_unbalanced.m -- if the original data does not form a balanced panel, then each time series will be investigated over its own (different) sample. (USED WITH THIS BALANCED-PANEL DATASET).
>> The primary output of the matlab codes HPdatingRGDP_balanced.m and HPdatingRGDP_unbalanced.m is a dummy variable that takes the value of one from peak to trough and zero otherwise.
* The matlab code automatically uploads the data from the spreadsheet DATA and stores the classical cycles it has extracted in the spreadsheet CYCLES.
>> This excel file (RGDP_cycles.xlsx) needs to be saved in the same folder that the codes HPdatingRGDP_balanced.m, HPdatingRGDP_unbalanced.m and its complementary matlab functions,
but there is no need to change it otherwise because the uploading of data and the storing of the output (the contraction indicator and the transformed indicator for the recession bar plot)
is all done AUTOMATICALLY.
UPDATING :
1. The matlab code uploads data from the spreadsheets DATA. We must check that all countries have some numeric observations.
We must also check that the first column is reserved for the dates and the first two rows are reserved for the short and long names of the series.
2. For the code to work properly, we must ensure that the ordering of the countries remains the same in DATA.
We must also check that the same ordering is applied to CYCLES.
These spreadsheets must also follow the rule that reserves the first column for dates and the first two rows for the short and the long names of the series.
3. If more quarters are included in the sample, then we have to extend the links that pull the information for the quarters
in the spreadsheet CYCLES.
4. We have to modify the matlab code HPdatingRGDP_balanced.m and HPdatingRGDP_unbalanced.m as needed:
- To adjust the 'turnphase', 'phase', and 'cycle' if we want to consider alternative specifications of the classical cycle.
Changes in the length of the series do not require a change in the matlab code. The code is flexible enough that it will AUTOMATICALLY upload
all available data and then will AUTOMATICALLY store the recession indicators for each one of the series uploaded. Missing observations are marked with NA's.
5. Type HPdatingRGDP_balanced or HPdatingRGDP_unbalanced in matlab's command window in order to run the code.
-- The default options will calculate classical cycles on real GDP. The classical cycles will be automatically stored in the spreadsheets CYCLES.

## Sheet: Real GDP
Q1/1960 !Q mag=bil	.excel_last	B111GDPC@OECDNAQ	B112GDPC@OECDNAQ	B132GDPC@OECDNAQ	B134GDPC@OECDNAQ	B136GDPC@OECDNAQ	B156GDPC@OECDNAQ	B158GDPC@OECDNAQ	B184GDPC@OECDNAQ
.DESC		United States: Gross Domestic Product (SAAR, Bil.2010.US$, PPP)	United Kingdom: Gross Domestic Product (SAAR, Bil.2010.US$, PPP)	France: Gross Domestic Product (SAAR, Bil.2010.US$, PPP)	Germany: Gross Domestic Product (SAAR, Bil.2010.US$, PPP)	Italy: Gross Domestic Product (SAAR, Bil.2010.US$, PPP)	Canada: Gross Domestic Product (SAAR, Bil.2010.US$, PPP)	Japan: Gross Domestic Product (SAAR, Bil.2010US$, PPP)	Spain: Gross Domestic Product (SAAR, Bil.2010.US$, PPP)
.T1		Q1-1947	Q1-1955	Q1-1960	Q1-1960	Q1-1960	Q1-1960	Q1-1960	Q1-1960
.TN		Q1-2018	Q1-2018	Q1-2018	Q1-2018	Q1-2018	Q1-2018	Q1-2018	Q1-2018
.LSOURCE		Organization for Economic Cooperation & Development	Organization for Economic Cooperation & Development	Organization for Economic Cooperation & Development	Organization for Economic Cooperation & Development	Organization for Economic Cooperation & Development	Organization for Economic Cooperation & Development	Organization for Economic Cooperation & Development	Organization for Economic Cooperation & Development
.DTLM		Jun-29-2018 05:33	Jul-02-2018 06:06	Jun-26-2018 05:33	May-16-2018 06:21	Jun-04-2018 06:05	Jun-01-2018 05:26	Jun-08-2018 05:25	Jun-01-2018 05:26
Q1/1960	1960-03-31	3161.31	674.925	544.545	901.678	527.496	271.921	559.92	227.419
Q2/1960	1960-06-30	3149.31	670.087	546.59	917.725	535.238	266.692	560.95	232.094
Q3/1960	1960-09-30	3157.15	680.251	550.682	949.448	543.098	270.762	580.22	238.587
Q4/1960	1960-12-31	3118.94	684.405	557.209	959.152	543.515	271.658	602.52	243.39
Q1/1961	1961-03-31	3140.14	695.555	566.171	968.856	562.988	270.559	620.83	250.346
Q2/1961	1961-06-30	3198.51	698.355	575.231	963.63	574.898	277.363	634.07	261.465
Q3/1961	1961-09-30	3251.85	694.704	584.39	983.409	588.297	284.062	646.23	266.805
Q4/1961	1961-12-31	3317.75	693.595	594.319	987.889	599.552	288.039	675.88	274.333
Q1/1962	1962-03-31	3377.51	696.867	605.019	1002.44	608.425	295.666	684.96	280.823
Q2/1962	1962-06-30	3413.9	703.344	614.794	1012.89	614.976	297.815	694.53	287.356
Q3/1962	1962-09-30	3446.42	707.617	623.646	1037.15	618.668	301.723	703.02	294.393
Q4/1962	1962-12-31	3459.8	705.066	631.452	1034.91	627.957	307.856	717.71	295.183
Q1/1963	1963-03-31	3498.29	708.701	620.934	998.711	632.126	309.703	727.52	312.164
Q2/1963	1963-06-30	3543.9	739.096	648.661	1043.5	649.455	314.244	748.93	312.423
Q3/1963	1963-09-30	3613.08	742.856	670.059	1079.7	660.115	316.659	770.89	319.164
Q4/1963	1963-12-31	3638.86	759.352	672.145	1084.92	666.903	326.605	797.45	325.106
Q1/1964	1964-03-31	3717.57	763.921	684.799	1099.85	676.789	334.7	822.89	326.945
Q2/1964	1964-06-30	3761.78	777.109	691.366	1113.29	669.941	335.852	842.74	332.333
Q3/1964	1964-09-30	3812.87	780.174	699.844	1124.86	668.809	339.384	855.76	334.829
Q4/1964	1964-12-31	3826.39	792.045	706.168	1140.16	666.01	341.174	866.46	342.109
Q1/1965	1965-03-31	3920.76	789.835	707.736	1158.82	675.002	351.892	873.5	349.39
Q2/1965	1965-06-30	3974.36	790.676	725.345	1177.11	688.461	355.193	884.41	350.88
Q3/1965	1965-09-30	4055.08	797.246	735.826	1184.94	697.631	359.991	904.45	354.452
Q4/1965	1965-12-31	4150.72	802.183	746.071	1192.03	708.112	368.844	918.51	365.048
Q1/1966	1966-03-31	4253.21	803.506	752.802	1213.68	714.96	375.897	943.09	362.564
Q2/1966	1966-06-30	4270.63	808.173	764.188	1217.41	725.144	383.813	979.99	381.3
Q3/1966	1966-09-30	4301.05	810.839	772.903	1218.91	745.629	383.666	1003.82	388.864
Q4/1966	1966-12-31	4337.93	807.447	777.123	1199.87	749.202	388.295	1023.88	389.917
Q1/1967	1967-03-31	4377.75	818.441	790.44	1193.9	764.149	387.394	1051.01	390.991
Q2/1967	1967-06-30	4381.59	829.928	799.092	1190.17	780.585	395.522	1079.29	395.689
Q3/1967	1967-09-30	4419.42	833.579	806.733	1218.91	792.614	396.84	1116.71	402.476
Q4/1967	1967-12-31	4454.99	838.018	814.596	1234.58	808.276	398.341	1138.3	399.581
Q1/1968	1968-03-31	4545.46	868.486	838.298	1249.03	810.241	401.574	1165.46	408.108
Q2/1968	1968-06-30	4622.22	864.726	774.747	1258.74	827.213	412.479	1205.22	420.49
Q3/1968	1968-09-30	4655.51	881.933	862.861	1286.37	847.102	418.049	1232.51	423.881
Q4/1968	1968-12-31	4676.23	885.464	871.701	1305.79	866.933	423.811	1302.73	441.062
Q1/1969	1969-03-31	4748.94	883.494	873.303	1338.65	880.51	429.303	1314.19	456.711
Q2/1969	1969-06-30	4764.17	889.95	894.726	1355.82	896.41	431.365	1352.45	455.168
Q3/1969	1969-09-30	4793.99	894.97	903.184	1384.95	898.554	435.916	1384.85	463.659
Q4/1969	1969-12-31	4773.07	899.549	910.322	1406.23	880.391	442.055	1438.9	468.85
Q1/1970	1970-03-31	4764.61	893.803	927.721	1383.79	933.183	444.846	1482.99	477.616
Q2/1970	1970-06-30	4773.04	914.879	939.429	1438.81	939.996	444.663	1500.98	478.375
Q3/1970	1970-09-30	4815.32	923.949	952.368	1465.68	958.855	449.199	1541.21	480.819
Q4/1970	1970-12-31	4765.79	932.024	967.322	1478.11	959.927	449.957	1536.25	484.613
Q1/1971	1971-03-31	4893.4	926.522	968.57	1449.71	954.906	447.261	1550.25	488.398
Q2/1971	1971-06-30	4921.32	943.07	986.217	1480.14	958.936	460.339	1575.25	497.924
Q3/1971	1971-09-30	4959.8	959.478	1002.3	1505.74	972.982	473.026	1594.45	507.086
Q4/1971	1971-12-31	4974.28	963.274	1010.89	1504.48	978.475	478.398	1608.97	517.296
Q1/1972	1972-03-31	5063.54	964.286	1024.13	1506	989.285	476.534	1661.39	525.689
Q2/1972	1972-06-30	5180.79	990.096	1028.06	1530.59	988.837	490.084	1692.66	538.11
Q3/1972	1972-09-30	5228.54	992.788	1037.19	1566.34	1002.17	491.2	1728.79	549.932
Q4/1972	1972-12-31	5315.37	1008.32	1054.41	1590.68	1006.93	502.95	1772.28	560.826
Q1/1973	1973-03-31	5446.22	1058.29	1075.42	1612.67	1016.01	516.211	1831.56	571.149
Q2/1973	1973-06-30	5507.97	1059.8	1087.04	1624.59	1046.46	521.845	1848.31	581.332
Q3/1973	1973-09-30	5478.04	1049.66	1096.37	1629.91	1079.75	523.613	1853.7	590.933
Q4/1973	1973-12-31	5529.12	1045.2	1110.39	1633.97	1106.13	533.476	1876.61	600.657
Q1/1974	1974-03-31	5483.19	1016.71	1121.04	1647.79	1115.1	537.361	1812.13	610.858
Q2/1974	1974-06-30	5497.6	1031.38	1126.65	1646.52	1125.75	543.307	1825.18	618.576
Q3/1974	1974-09-30	5444.38	1038.07	1137.28	1646.52	1127.62	542.668	1848.53	622.942
Q4/1974	1974-12-31	5422.6	1023	1120.1	1625.73	1104.05	540.134	1838.51	623.354
Q1/1975	1975-03-31	5357.09	1023.5	1115.07	1616.35	1084.84	536.479	1840.92	620.225
Q2/1975	1975-06-30	5398.36	1006.76	1117.88	1608.23	1084.29	543.495	1881.79	619.71
Q3/1975	1975-09-30	5487.57	1003.37	1122.21	1625.73	1099.7	553.643	1903.2	622.417
Q4/1975	1975-12-31	5561.56	1014.7	1137.37	1657.67	1112.02	560.03	1923.22	626.792
Q1/1976	1976-03-31	5687.15	1031	1154.06	1672.57	1131.61	569.764	1939.51	633.021
Q2/1976	1976-06-30	5730.12	1029.17	1167.82	1697.42	1152.06	582.079	1950.97	640.328
Q3/1976	1976-09-30	5759.25	1041.98	1173.34	1697.92	1181.34	584.614	1978.4	646.538
Q4/1976	1976-12-31	5802.48	1063.96	1187.96	1729.36	1201.83	585.849	1980.75	651.503
Q1/1977	1977-03-31	5869.99	1064.49	1201.09	1744.13	1202.31	593.944	2024.08	656.664
Q2/1977	1977-06-30	5985.2	1056.77	1206.32	1754.02	1195.62	597.319	2038.32	659.643
Q3/1977	1977-09-30	6091.09	1064.09	1211.85	1753.51	1184.43	600.194	2052.22	661.835
Q4/1977	1977-12-31	6091.73	1082.54	1214.61	1783.68	1194.58	609.754	2080.06	666.256
Q1/1978	1978-03-31	6112.92	1091.88	1231.48	1791.03	1214.1	614.97	2119.35	670.416
Q2/1978	1978-06-30	6350.6	1105.08	1251.96	1798.13	1235.1	620.613	2139.95	671.774
Q3/1978	1978-09-30	6412.7	1120.03	1250.86	1821.71	1241.6	625.085	2167.63	670.95
Q4/1978	1978-12-31	6498.71	1130.24	1261.5	1843.01	1260.52	630.398	2198.91	669.957
Q1/1979	1979-03-31	6511.62	1125.81	1272.35	1845.29	1280.44	635.821	2231.79	668.889
Q2/1979	1979-06-30	6519.5	1175.72	1284.52	1902.59	1289.75	644.448	2272.57	669.929
Q3/1979	1979-09-30	6566.32	1150.02	1299.2	1902.59	1312.07	648.618	2289.9	671.54
Q4/1979	1979-12-31	6583.31	1162.09	1301.67	1914.25	1342.95	652.98	2299.86	673.9
Q1/1980	1980-03-31	6604.61	1150.79	1316.23	1929.59	1340.49	657.595	2308.66	678.413
Q2/1980	1980-06-30	6470.66	1128.01	1308.7	1917.17	1350.89	657.379	2296.49	680.719
Q3/1980	1980-09-30	6460.85	1126.61	1308.69	1909.56	1352.02	656.488	2347.93	678.02
Q4/1980	1980-12-31	6580.59	1114.65	1307.9	1907.03	1363.54	665.648	2397.83	681.952
Q1/1981	1981-03-31	6716.78	1112.88	1312.4	1929.72	1355.76	680.443	2412.53	678.091
Q2/1981	1981-06-30	6667.73	1115.59	1318.86	1924.9	1358.41	687.951	2442.05	677.34
Q3/1981	1981-09-30	6744.24	1127.72	1329.44	1929.97	1359.04	681.786	2436.62	680.352
Q4/1981	1981-12-31	6665.56	1129.02	1336.66	1928.45	1370.07	678.68	2454.41	679.673
Q1/1982	1982-03-31	6554.06	1130.78	1347.28	1935.67	1369.53	670.607	2492.02	682.471
Q2/1982	1982-06-30	6589.77	1143.49	1356.64	1923.76	1365.63	662.876	2509.13	685.063
Q3/1982	1982-09-30	6566.03	1146.51	1357.38	1904.74	1364.9	657.032	2520.1	689.675
Q4/1982	1982-12-31	6572.44	1154.59	1365.5	1909.31	1360.94	650.968	2555.12	692.106
Q1/1983	1983-03-31	6658.52	1175.5	1371	1926.61	1364.74	661.674	2556.73	694.635
Q2/1983	1983-06-30	6810.47	1185.52	1371.16	1946.89	1363.1	674.824	2575.95	698.925
Q3/1983	1983-09-30	6943.81	1198.58	1373.26	1942.84	1388.48	682.47	2614.5	699.953
Q4/1983	1983-12-31	7087.01	1208.94	1379.71	1969.71	1419.26	691.153	2636.28	704.476
Q1/1984	1984-03-31	7227.81	1217.28	1388.95	1995.76	1416.48	703.006	2666.64	710.303
Q2/1984	1984-06-30	7354.76	1206.66	1393.01	1964.32	1421.04	716.757	2707.02	708.113
Q3/1984	1984-09-30	7427.11	1214.51	1400.87	2017.82	1437.77	719.799	2740.1	714.28
Q4/1984	1984-12-31	7486.36	1238.64	1404.28	2034.81	1438	731.144	2744.83	715.192
Q1/1985	1985-03-31	7560.78	1249.09	1406.83	2023.71	1446.23	742.25	2812.1	723.173
Q2/1985	1985-06-30	7630	1275.7	1416.31	2044	1465.33	744.634	2869.04	722.494
Q3/1985	1985-09-30	7748.7	1276.91	1425.45	2070.62	1477.07	754.061	2906.59	729.984
Q4/1985	1985-12-31	7806.83	1280.01	1431.13	2083.04	1486.91	765.663	2945.2	738.368
Q1/1986	1986-03-31	7879.19	1294.59	1436.41	2071.13	1496.18	765.494	2956.91	740.45
Q2/1986	1986-06-30	7915.36	1304.07	1451.91	2094.96	1505.86	769.901	2949.64	758.084
Q3/1986	1986-09-30	7995.03	1309.76	1457.85	2110.42	1520.89	770.883	2966.92	752.74
Q4/1986	1986-12-31	8036.43	1332.88	1461.36	2131.47	1527.13	765.329	2990.32	757.548
Q1/1987	1987-03-31	8092.62	1344.77	1465.32	2077.97	1533.39	783.054	2988.18	773.064
Q2/1987	1987-06-30	8183.46	1364.19	1482.09	2124.62	1556.61	793.207	3050.8	784.63
Q3/1987	1987-09-30	8257.68	1397.18	1493.4	2139.33	1561.1	805.358	3111.82	800.834
Q4/1987	1987-12-31	8393.98	1412.99	1516.22	2173.55	1577.9	815.815	3191.95	817.217
Q1/1988	1988-03-31	8441.18	1438.55	1535.88	2153.84	1601.12	827.748	3268.14	819.844
Q2/1988	1988-06-30	8552.72	1447.15	1546.11	2192.89	1611.29	835.103	3263.37	829.873
Q3/1988	1988-09-30	8602.08	1469.29	1566.55	2217.73	1632.47	835.171	3336.18	844.834
Q4/1988	1988-12-31	8716.02	1481.95	1581.96	2243.85	1651.96	841.04	3371.33	842.94
Q1/1989	1989-03-31	8803.95	1488.4	1603.35	2267.3	1662.22	850.632	3462.29	862.817
Q2/1989	1989-06-30	8873.18	1498.11	1616.23	2276.43	1669.41	853.9	3417.09	871.308
Q3/1989	1989-09-30	8939.42	1499.51	1635.28	2297.21	1686.81	856.982	3476.87	882.981
Q4/1989	1989-12-31	8958.33	1500.86	1654.72	2323.83	1704.17	855.145	3584.6	881.515
Q1/1990	1990-03-31	9056.41	1511.09	1666.15	2372.07	1710.96	863.172	3567.54	889.237
Q2/1990	1990-06-30	9091.43	1518.87	1674.05	2383.73	1716.18	859.583	3680.06	904.351
Q3/1990	1990-09-30	9093.68	1503.11	1680.13	2433.93	1718.93	853.413	3741.77	901.652
Q4/1990	1990-12-31	9016.16	1498.07	1684.98	2476.78	1707.76	845.763	3734.66	935.749
Q1/1991	1991-03-31	8973.85	1493.86	1682.25	2548.49	1741.47	833.527	3767.2	917.767
Q2/1991	1991-06-30	9043.49	1492.04	1691.82	2537.91	1731.93	837.339	3811.89	928.957
Q3/1991	1991-09-30	9086.9	1488.63	1695.01	2525.08	1732.56	838.408	3803.45	935.973
Q4/1991	1991-12-31	9126.57	1491	1704.16	2557.8	1752.89	839.919	3830.17	940.629
Q1/1992	1992-03-31	9234.38	1490.88	1719.43	2598.77	1757.6	840.471	3831.36	950.014
Q2/1992	1992-06-30	9336.2	1489.06	1719.59	2581.77	1756.6	841.483	3844.77	937.626
Q3/1992	1992-09-30	9426.96	1498.6	1719.17	2574.08	1752.7	846.012	3849.3	938.225
Q4/1992	1992-12-31	9521.42	1509.12	1715.44	2568.62	1740.62	850.799	3824.76	932.112
Q1/1993	1993-03-31	9539.17	1520.17	1703.63	2546.01	1738.19	856.214	3867.86	923.415
Q2/1993	1993-06-30	9595.9	1527.89	1706.03	2547.29	1733.99	864.004	3843.37	923.353
Q3/1993	1993-09-30	9642.69	1540.19	1708.65	2565.25	1731.26	872.255	3815.78	934.462
Q4/1993	1993-12-31	9771.42	1550.67	1712.52	2563.65	1743.95	876.006	3839.82	937.984
Q1/1994	1994-03-31	9867.22	1569.54	1723.77	2595.01	1757.24	888.896	3871.57	945.742
Q2/1994	1994-06-30	10002.1	1587.76	1743.44	2603.99	1769.95	901.923	3851.38	947.815
Q3/1994	1994-09-30	10061.1	1605.79	1753.37	2623.55	1780.99	913.445	3900.31	955.341
Q4/1994	1994-12-31	10175.3	1614.94	1769.97	2658.2	1797.71	920.072	3882.46	958.916
Q1/1995	1995-03-31	10210.1	1620.13	1778.44	2646.09	1820.28	928.56	3921.44	969.164
Q2/1995	1995-06-30	10245.8	1625.98	1787.09	2669.18	1821.56	928.876	3969.99	975.829
Q3/1995	1995-09-30	10333.5	1641.95	1789.32	2678.16	1829.66	930.089	4014.2	980.471
Q4/1995	1995-12-31	10406.8	1646.57	1790.14	2676.88	1844.81	933.86	4023.8	987.378
Q1/1996	1996-03-31	10475.1	1661.42	1802.15	2650.1	1852.81	934.441	4061.5	993.75
Q2/1996	1996-06-30	10658	1666.71	1806.52	2687.95	1843.15	940.945	4107.56	1000.07
Q3/1996	1996-09-30	10756.6	1678.1	1817.41	2704.31	1847.31	949.201	4106.39	1009.82
Q4/1996	1996-12-31	10870.2	1694.07	1819.23	2719.38	1846.21	956.75	4153.69	1013.86
Q1/1997	1997-03-31	10953.1	1726.73	1826.07	2703.02	1851.18	969.373	4168.08	1025.4
Q2/1997	1997-06-30	11118.3	1741.99	1847.24	2741.2	1876.33	980.289	4137.03	1034.77
Q3/1997	1997-09-30	11259.9	1750.54	1860.61	2751.78	1887.64	992.001	4150.43	1045.23
Q4/1997	1997-12-31	11347.3	1768.69	1880.55	2771.35	1918.67	1001.51	4152.7	1060.33
Q1/1998	1998-03-31	11459.5	1782.13	1897.27	2793.56	1906.2	1015.55	4102.5	1070.87
Q2/1998	1998-06-30	11570.7	1798.29	1913.67	2784.58	1913.57	1015.99	4087.2	1078.96
Q3/1998	1998-09-30	11722	1811.7	1928.05	2791.96	1916.12	1025.42	4093.58	1091.9
Q4/1998	1998-12-31	11914.5	1829.32	1942.3	2791.31	1907.22	1039.27	4128.92	1103.37
Q1/1999	1999-03-31	12009.6	1839.66	1953.7	2813.69	1918.49	1058.11	4072.1	1112.31
Q2/1999	1999-06-30	12108.6	1840.8	1969.94	2819.78	1926.7	1066.99	4091.93	1129.08
Q3/1999	1999-09-30	12261	1873.65	1992.75	2849.29	1942.79	1083.61	4111.44	1142.57
Q4/1999	1999-12-31	12473.9	1899.41	2017.9	2884.9	1970.32	1099.02	4111.11	1156.01
Q1/2000	2000-03-31	12510.1	1915.44	2039.08	2912	1993.23	1116.56	4191.21	1174.45
Q2/2000	2000-06-30	12746.3	1927.15	2057.75	2941.51	2007.44	1129.86	4199.97	1188.86
Q3/2000	2000-09-30	12761.7	1932.56	2071.54	2937.34	2018.27	1141.27	4203.4	1201.77
Q4/2000	2000-12-31	12834.2	1935.77	2089.12	2939.59	2049.38	1143.3	4242.74	1215.03
Q1/2001	2001-03-31	12797.7	1961.34	2099.62	2987.62	2056.87	1149.25	4267.84	1227.15
Q2/2001	2001-06-30	12865.6	1976.77	2103.65	2990.19	2051.26	1152.22	4247.34	1236.91
Q3/2001	2001-09-30	12824.9	1991.5	2110.42	2981.53	2042.57	1151.35	4200.25	1249.22
Q4/2001	2001-12-31	12860.5	2000.37	2110.46	2985.06	2043.57	1158.41	4189.06	1258.07
Q1/2002	2002-03-31	12978.9	2009.87	2116.7	2975.84	2041.9	1175.66	4194.01	1265.23
Q2/2002	2002-06-30	13050.5	2023.13	2127.79	2983.53	2051.94	1182.36	4226.62	1274.75
Q3/2002	2002-09-30	13114	2038.46	2135.41	2997.65	2056.35	1192.7	4243.4	1282.46
Q4/2002	2002-12-31	13122.4	2056.74	2136.2	2991.23	2064.33	1199.3	4254.61	1292.09
Q1/2003	2003-03-31	13190.3	2070.26	2139.41	2954.99	2058.16	1205.91	4249.92	1304.84
Q2/2003	2003-06-30	13312.7	2089.86	2134.78	2955.63	2051.67	1204.12	4283.91	1313.7
Q3/2003	2003-09-30	13535.7	2111.23	2148.55	2970.38	2054.03	1208.66	4301.23	1322.72
Q4/2003	2003-12-31	13694	2128.29	2165.89	2981.29	2070.47	1216.95	4349.01	1336.3
Q1/2004	2004-03-31	13772.7	2139.93	2185.07	2980.57	2080.04	1225.72	4382.81	1344.42
Q2/2004	2004-06-30	13873.7	2148.13	2198.92	2990.83	2086.8	1240.21	4381.3	1354.85
Q3/2004	2004-09-30	13999.8	2151.68	2207.47	2985.38	2088.79	1254.96	4404.19	1368.5
Q4/2004	2004-12-31	14120.8	2157.1	2222.54	2988.27	2092.21	1263.97	4392.51	1376.92
Q1/2005	2005-03-31	14271.3	2177.55	2228.43	2982.49	2087	1268.28	4413.65	1390.84
Q2/2005	2005-06-30	14345.8	2201.7	2232.83	3002.38	2107.27	1277.31	4448.18	1405.02
Q3/2005	2005-09-30	14466.3	2227.46	2243.76	3026.76	2121.33	1293.03	4490.56	1418.34
Q4/2005	2005-12-31	14549	2260.83	2259.55	3038.31	2127.29	1305.83	4500.07	1433.18
Q1/2006	2006-03-31	14723.8	2266.85	2278.43	3066.61	2134.88	1316.3	4503.47	1448.7
Q2/2006	2006-06-30	14767.8	2271.9	2300.78	3115.69	2147.46	1316.93	4519.14	1463.83
Q3/2006	2006-09-30	14781	2273.36	2301.24	3146.81	2155.08	1320.59	4511.36	1478.28
Q4/2006	2006-12-31	14896.7	2281.38	2318.35	3187.86	2183.14	1325.58	4566.5	1492.32
Q1/2007	2007-03-31	14905.9	2304.08	2336.39	3200.93	2186.65	1334.15	4600.08	1507.58
Q2/2007	2007-06-30	15019.9	2320.7	2355.01	3224.67	2184.46	1347.02	4605.5	1519.81
Q3/2007	2007-09-30	15120.9	2340.36	2362.34	3251.94	2183.66	1352.62	4584.71	1532.14
Q4/2007	2007-12-31	15174.9	2359.83	2368.71	3260.92	2180.43	1354.51	4607.89	1545.32
Q1/2008	2008-03-31	15071.3	2368.23	2378.68	3289.55	2204.63	1355.32	4621.83	1552.37
Q2/2008	2008-06-30	15146.1	2350.7	2367.97	3280.57	2182.95	1360.02	4598.47	1553.24
Q3/2008	2008-09-30	15073.5	2311.99	2359.72	3268.7	2152.42	1371.36	4539.65	1541.5
Q4/2008	2008-12-31	14755	2261.78	2327.08	3205.5	2103.61	1355.5	4436.68	1525.97
Q1/2009	2009-03-31	14550.6	2224.18	2288.74	3061.72	2045.71	1324.53	4219.79	1501.57
Q2/2009	2009-06-30	14530.9	2219.96	2285.62	3063.97	2029.46	1309.92	4308.8	1487.03
Q3/2009	2009-09-30	14578.4	2223.12	2289.29	3082.25	2041.03	1315.85	4309.96	1482.4
Q4/2009	2009-12-31	14719.5	2230.82	2304.9	3110.48	2049.06	1331.39	4371.41	1481.47
Q1/2010	2010-03-31	14783.2	2240.88	2314.47	3133.33	2057.68	1347.25	4410.23	1485.94
Q2/2010	2010-06-30	14926	2260.12	2326.86	3197.49	2068.98	1354.18	4464.92	1488.65
Q3/2010	2010-09-30	15026.8	2273.19	2341.15	3223.47	2079.91	1363.85	4546.09	1489.37
Q4/2010	2010-12-31	15121.5	2276.15	2357.07	3250.41	2093.26	1379.27	4512.47	1489.35
Q1/2011	2011-03-31	15063.1	2293.22	2381.72	3307.83	2099.74	1389.46	4444.58	1483.98
Q2/2011	2011-06-30	15172.6	2296.6	2383.24	3313.6	2101.08	1392.1	4421.12	1476.87
Q3/2011	2011-09-30	15204.6	2302.78	2388.28	3329.32	2088.8	1411.42	4528.66	1470.86
Q4/2011	2011-12-31	15375.8	2306.61	2394.39	3329.96	2069.98	1422.58	4522	1462.14
Q1/2012	2012-03-31	15477.8	2321.55	2395.95	3340.47	2051.81	1423.03	4575.74	1449.45
Q2/2012	2012-06-30	15550.1	2320.3	2394.17	3343.68	2033	1427.73	4545.28	1435.66
Q3/2012	2012-09-30	15568.7	2347.93	2397.67	3351.37	2023.84	1430.54	4527.27	1425.05
Q4/2012	2012-12-31	15572.2	2342.56	2396.34	3336.3	2012.56	1432.29	4537.13	1411.13
Q1/2013	2013-03-31	15681.1	2357.7	2395.57	3328.92	1991.9	1447.05	4591.55	1406.29
Q2/2013	2013-06-30	15711.1	2370.63	2411.9	3358.43	1992.08	1456.43	4630.55	1405.11
Q3/2013	2013-09-30	15832.4	2391.88	2411.72	3375.43	1998.78	1468.36	4665.95	1404.15
Q4/2013	2013-12-31	15986.8	2403.08	2421.77	3389.23	1996.38	1483.16	4664.48	1408.16
Q1/2014	2014-03-31	15950	2423.22	2423.59	3419.06	1997.08	1485.01	4709.88	1413.72
Q2/2014	2014-06-30	16130.5	2443.39	2429.61	3413.28	1995.66	1502.81	4623.55	1419.19
Q3/2014	2014-09-30	16336.6	2460.51	2440.46	3424.19	2000.45	1513.75	4621.71	1428.84
Q4/2014	2014-12-31	16418.3	2476.89	2443.14	3454.66	2000.5	1520.63	4650.55	1439.56
Q1/2015	2015-03-31	16549.7	2487.88	2453.42	3458.51	2005.05	1517.59	4720.26	1454.7
Q2/2015	2015-06-30	16661.9	2502.03	2452.88	3473.91	2013.38	1515.39	4716.89	1467.05
Q3/2015	2015-09-30	16729.5	2512.86	2462.19	3485.13	2017.86	1523.96	4720.97	1480.83
Q4/2015	2015-12-31	16749.7	2531.54	2468.36	3499.89	2023.64	1525.54	4706.36	1494.41
Q1/2016	2016-03-31	16774	2539.75	2484.55	3522.02	2028.31	1534.95	4746.28	1505.61
Q2/2016	2016-06-30	16867	2543.72	2478.87	3538.38	2030.27	1530.92	4756.65	1517.46
Q3/2016	2016-09-30	16983.1	2555.72	2483.79	3550.25	2034.94	1547.02	4765.62	1528.29
Q4/2016	2016-12-31	17057.2	2574.67	2498.88	3565.01	2044.77	1555.6	4777.47	1538.72
Q1/2017	2017-03-31	17109.7	2584.76	2518.18	3597.08	2055.14	1570.96	4809.68	1550.82
Q2/2017	2017-06-30	17239.1	2590.26	2534.76	3619.86	2063.23	1588.57	4835.06	1564.23
Q3/2017	2017-09-30	17373.5	2599.36	2552.05	3646.48	2070.31	1595.08	4859.03	1575.12
Q4/2017	2017-12-31	17497.6	2608.6	2569.32	3668.61	2077.59	1601.86	4871.43	1585.77
Q1/2018	2018-03-31	17584	2614.73	2573.4	3679.52	2083.44	1607.2	4864.1	1596.81

## Sheet: DATA
Country	United States	United Kingdom	France	Germany	Italy	Canada	Japan	Spain
Quarter	US	UK	FR	DE	IT	CA	JP	ES
Q1-1960	3161.31	674.925	544.545	901.678	527.496	271.921	559.92	227.419
Q2-1960	3149.31	670.087	546.59	917.725	535.238	266.692	560.95	232.094
Q3-1960	3157.15	680.251	550.682	949.448	543.098	270.762	580.22	238.587
Q4-1960	3118.94	684.405	557.209	959.152	543.515	271.658	602.52	243.39
Q1-1961	3140.14	695.555	566.171	968.856	562.988	270.559	620.83	250.346
Q2-1961	3198.51	698.355	575.231	963.63	574.898	277.363	634.07	261.465
Q3-1961	3251.85	694.704	584.39	983.409	588.297	284.062	646.23	266.805
Q4-1961	3317.75	693.595	594.319	987.889	599.552	288.039	675.88	274.333
Q1-1962	3377.51	696.867	605.019	1002.44	608.425	295.666	684.96	280.823
Q2-1962	3413.9	703.344	614.794	1012.89	614.976	297.815	694.53	287.356
Q3-1962	3446.42	707.617	623.646	1037.15	618.668	301.723	703.02	294.393
Q4-1962	3459.8	705.066	631.452	1034.91	627.957	307.856	717.71	295.183
Q1-1963	3498.29	708.701	620.934	998.711	632.126	309.703	727.52	312.164
Q2-1963	3543.9	739.096	648.661	1043.5	649.455	314.244	748.93	312.423
Q3-1963	3613.08	742.856	670.059	1079.7	660.115	316.659	770.89	319.164
Q4-1963	3638.86	759.352	672.145	1084.92	666.903	326.605	797.45	325.106
Q1-1964	3717.57	763.921	684.799	1099.85	676.789	334.7	822.89	326.945
Q2-1964	3761.78	777.109	691.366	1113.29	669.941	335.852	842.74	332.333
Q3-1964	3812.87	780.174	699.844	1124.86	668.809	339.384	855.76	334.829
Q4-1964	3826.39	792.045	706.168	1140.16	666.01	341.174	866.46	342.109
Q1-1965	3920.76	789.835	707.736	1158.82	675.002	351.892	873.5	349.39
Q2-1965	3974.36	790.676	725.345	1177.11	688.461	355.193	884.41	350.88
Q3-1965	4055.08	797.246	735.826	1184.94	697.631	359.991	904.45	354.452
Q4-1965	4150.72	802.183	746.071	1192.03	708.112	368.844	918.51	365.048
Q1-1966	4253.21	803.506	752.802	1213.68	714.96	375.897	943.09	362.564
Q2-1966	4270.63	808.173	764.188	1217.41	725.144	383.813	979.99	381.3
Q3-1966	4301.05	810.839	772.903	1218.91	745.629	383.666	1003.82	388.864
Q4-1966	4337.93	807.447	777.123	1199.87	749.202	388.295	1023.88	389.917
Q1-1967	4377.75	818.441	790.44	1193.9	764.149	387.394	1051.01	390.991
Q2-1967	4381.59	829.928	799.092	1190.17	780.585	395.522	1079.29	395.689
Q3-1967	4419.42	833.579	806.733	1218.91	792.614	396.84	1116.71	402.476
Q4-1967	4454.99	838.018	814.596	1234.58	808.276	398.341	1138.3	399.581
Q1-1968	4545.46	868.486	838.298	1249.03	810.241	401.574	1165.46	408.108
Q2-1968	4622.22	864.726	774.747	1258.74	827.213	412.479	1205.22	420.49
Q3-1968	4655.51	881.933	862.861	1286.37	847.102	418.049	1232.51	423.881
Q4-1968	4676.23	885.464	871.701	1305.79	866.933	423.811	1302.73	441.062
Q1-1969	4748.94	883.494	873.303	1338.65	880.51	429.303	1314.19	456.711
Q2-1969	4764.17	889.95	894.726	1355.82	896.41	431.365	1352.45	455.168
Q3-1969	4793.99	894.97	903.184	1384.95	898.554	435.916	1384.85	463.659
Q4-1969	4773.07	899.549	910.322	1406.23	880.391	442.055	1438.9	468.85
Q1-1970	4764.61	893.803	927.721	1383.79	933.183	444.846	1482.99	477.616
Q2-1970	4773.04	914.879	939.429	1438.81	939.996	444.663	1500.98	478.375
Q3-1970	4815.32	923.949	952.368	1465.68	958.855	449.199	1541.21	480.819
Q4-1970	4765.79	932.024	967.322	1478.11	959.927	449.957	1536.25	484.613
Q1-1971	4893.4	926.522	968.57	1449.71	954.906	447.261	1550.25	488.398
Q2-1971	4921.32	943.07	986.217	1480.14	958.936	460.339	1575.25	497.924
Q3-1971	4959.8	959.478	1002.3	1505.74	972.982	473.026	1594.45	507.086
Q4-1971	4974.28	963.274	1010.89	1504.48	978.475	478.398	1608.97	517.296
Q1-1972	5063.54	964.286	1024.13	1506	989.285	476.534	1661.39	525.689
Q2-1972	5180.79	990.096	1028.06	1530.59	988.837	490.084	1692.66	538.11
Q3-1972	5228.54	992.788	1037.19	1566.34	1002.17	491.2	1728.79	549.932
Q4-1972	5315.37	1008.32	1054.41	1590.68	1006.93	502.95	1772.28	560.826
Q1-1973	5446.22	1058.29	1075.42	1612.67	1016.01	516.211	1831.56	571.149
Q2-1973	5507.97	1059.8	1087.04	1624.59	1046.46	521.845	1848.31	581.332
Q3-1973	5478.04	1049.66	1096.37	1629.91	1079.75	523.613	1853.7	590.933
Q4-1973	5529.12	1045.2	1110.39	1633.97	1106.13	533.476	1876.61	600.657
Q1-1974	5483.19	1016.71	1121.04	1647.79	1115.1	537.361	1812.13	610.858
Q2-1974	5497.6	1031.38	1126.65	1646.52	1125.75	543.307	1825.18	618.576
Q3-1974	5444.38	1038.07	1137.28	1646.52	1127.62	542.668	1848.53	622.942
Q4-1974	5422.6	1023	1120.1	1625.73	1104.05	540.134	1838.51	623.354
Q1-1975	5357.09	1023.5	1115.07	1616.35	1084.84	536.479	1840.92	620.225
Q2-1975	5398.36	1006.76	1117.88	1608.23	1084.29	543.495	1881.79	619.71
Q3-1975	5487.57	1003.37	1122.21	1625.73	1099.7	553.643	1903.2	622.417
Q4-1975	5561.56	1014.7	1137.37	1657.67	1112.02	560.03	1923.22	626.792
Q1-1976	5687.15	1031	1154.06	1672.57	1131.61	569.764	1939.51	633.021
Q2-1976	5730.12	1029.17	1167.82	1697.42	1152.06	582.079	1950.97	640.328
Q3-1976	5759.25	1041.98	1173.34	1697.92	1181.34	584.614	1978.4	646.538
Q4-1976	5802.48	1063.96	1187.96	1729.36	1201.83	585.849	1980.75	651.503
Q1-1977	5869.99	1064.49	1201.09	1744.13	1202.31	593.944	2024.08	656.664
Q2-1977	5985.2	1056.77	1206.32	1754.02	1195.62	597.319	2038.32	659.643
Q3-1977	6091.09	1064.09	1211.85	1753.51	1184.43	600.194	2052.22	661.835
Q4-1977	6091.73	1082.54	1214.61	1783.68	1194.58	609.754	2080.06	666.256
Q1-1978	6112.92	1091.88	1231.48	1791.03	1214.1	614.97	2119.35	670.416
Q2-1978	6350.6	1105.08	1251.96	1798.13	1235.1	620.613	2139.95	671.774
Q3-1978	6412.7	1120.03	1250.86	1821.71	1241.6	625.085	2167.63	670.95
Q4-1978	6498.71	1130.24	1261.5	1843.01	1260.52	630.398	2198.91	669.957
Q1-1979	6511.62	1125.81	1272.35	1845.29	1280.44	635.821	2231.79	668.889
Q2-1979	6519.5	1175.72	1284.52	1902.59	1289.75	644.448	2272.57	669.929
Q3-1979	6566.32	1150.02	1299.2	1902.59	1312.07	648.618	2289.9	671.54
Q4-1979	6583.31	1162.09	1301.67	1914.25	1342.95	652.98	2299.86	673.9
Q1-1980	6604.61	1150.79	1316.23	1929.59	1340.49	657.595	2308.66	678.413
Q2-1980	6470.66	1128.01	1308.7	1917.17	1350.89	657.379	2296.49	680.719
Q3-1980	6460.85	1126.61	1308.69	1909.56	1352.02	656.488	2347.93	678.02
Q4-1980	6580.59	1114.65	1307.9	1907.03	1363.54	665.648	2397.83	681.952
Q1-1981	6716.78	1112.88	1312.4	1929.72	1355.76	680.443	2412.53	678.091
Q2-1981	6667.73	1115.59	1318.86	1924.9	1358.41	687.951	2442.05	677.34
Q3-1981	6744.24	1127.72	1329.44	1929.97	1359.04	681.786	2436.62	680.352
Q4-1981	6665.56	1129.02	1336.66	1928.45	1370.07	678.68	2454.41	679.673
Q1-1982	6554.06	1130.78	1347.28	1935.67	1369.53	670.607	2492.02	682.471
Q2-1982	6589.77	1143.49	1356.64	1923.76	1365.63	662.876	2509.13	685.063
Q3-1982	6566.03	1146.51	1357.38	1904.74	1364.9	657.032	2520.1	689.675
Q4-1982	6572.44	1154.59	1365.5	1909.31	1360.94	650.968	2555.12	692.106
Q1-1983	6658.52	1175.5	1371	1926.61	1364.74	661.674	2556.73	694.635
Q2-1983	6810.47	1185.52	1371.16	1946.89	1363.1	674.824	2575.95	698.925
Q3-1983	6943.81	1198.58	1373.26	1942.84	1388.48	682.47	2614.5	699.953
Q4-1983	7087.01	1208.94	1379.71	1969.71	1419.26	691.153	2636.28	704.476
Q1-1984	7227.81	1217.28	1388.95	1995.76	1416.48	703.006	2666.64	710.303
Q2-1984	7354.76	1206.66	1393.01	1964.32	1421.04	716.757	2707.02	708.113
Q3-1984	7427.11	1214.51	1400.87	2017.82	1437.77	719.799	2740.1	714.28
Q4-1984	7486.36	1238.64	1404.28	2034.81	1438	731.144	2744.83	715.192
Q1-1985	7560.78	1249.09	1406.83	2023.71	1446.23	742.25	2812.1	723.173
Q2-1985	7630	1275.7	1416.31	2044	1465.33	744.634	2869.04	722.494
Q3-1985	7748.7	1276.91	1425.45	2070.62	1477.07	754.061	2906.59	729.984
Q4-1985	7806.83	1280.01	1431.13	2083.04	1486.91	765.663	2945.2	738.368
Q1-1986	7879.19	1294.59	1436.41	2071.13	1496.18	765.494	2956.91	740.45
Q2-1986	7915.36	1304.07	1451.91	2094.96	1505.86	769.901	2949.64	758.084
Q3-1986	7995.03	1309.76	1457.85	2110.42	1520.89	770.883	2966.92	752.74
Q4-1986	8036.43	1332.88	1461.36	2131.47	1527.13	765.329	2990.32	757.548
Q1-1987	8092.62	1344.77	1465.32	2077.97	1533.39	783.054	2988.18	773.064
Q2-1987	8183.46	1364.19	1482.09	2124.62	1556.61	793.207	3050.8	784.63
Q3-1987	8257.68	1397.18	1493.4	2139.33	1561.1	805.358	3111.82	800.834
Q4-1987	8393.98	1412.99	1516.22	2173.55	1577.9	815.815	3191.95	817.217
Q1-1988	8441.18	1438.55	1535.88	2153.84	1601.12	827.748	3268.14	819.844
Q2-1988	8552.72	1447.15	1546.11	2192.89	1611.29	835.103	3263.37	829.873
Q3-1988	8602.08	1469.29	1566.55	2217.73	1632.47	835.171	3336.18	844.834
Q4-1988	8716.02	1481.95	1581.96	2243.85	1651.96	841.04	3371.33	842.94
Q1-1989	8803.95	1488.4	1603.35	2267.3	1662.22	850.632	3462.29	862.817
Q2-1989	8873.18	1498.11	1616.23	2276.43	1669.41	853.9	3417.09	871.308
Q3-1989	8939.42	1499.51	1635.28	2297.21	1686.81	856.982	3476.87	882.981
Q4-1989	8958.33	1500.86	1654.72	2323.83	1704.17	855.145	3584.6	881.515
Q1-1990	9056.41	1511.09	1666.15	2372.07	1710.96	863.172	3567.54	889.237
Q2-1990	9091.43	1518.87	1674.05	2383.73	1716.18	859.583	3680.06	904.351
Q3-1990	9093.68	1503.11	1680.13	2433.93	1718.93	853.413	3741.77	901.652
Q4-1990	9016.16	1498.07	1684.98	2476.78	1707.76	845.763	3734.66	935.749
Q1-1991	8973.85	1493.86	1682.25	2548.49	1741.47	833.527	3767.2	917.767
Q2-1991	9043.49	1492.04	1691.82	2537.91	1731.93	837.339	3811.89	928.957
Q3-1991	9086.9	1488.63	1695.01	2525.08	1732.56	838.408	3803.45	935.973
Q4-1991	9126.57	1491	1704.16	2557.8	1752.89	839.919	3830.17	940.629
Q1-1992	9234.38	1490.88	1719.43	2598.77	1757.6	840.471	3831.36	950.014
Q2-1992	9336.2	1489.06	1719.59	2581.77	1756.6	841.483	3844.77	937.626
Q3-1992	9426.96	1498.6	1719.17	2574.08	1752.7	846.012	3849.3	938.225
Q4-1992	9521.42	1509.12	1715.44	2568.62	1740.62	850.799	3824.76	932.112
Q1-1993	9539.17	1520.17	1703.63	2546.01	1738.19	856.214	3867.86	923.415
Q2-1993	9595.9	1527.89	1706.03	2547.29	1733.99	864.004	3843.37	923.353
Q3-1993	9642.69	1540.19	1708.65	2565.25	1731.26	872.255	3815.78	934.462
Q4-1993	9771.42	1550.67	1712.52	2563.65	1743.95	876.006	3839.82	937.984
Q1-1994	9867.22	1569.54	1723.77	2595.01	1757.24	888.896	3871.57	945.742
Q2-1994	10002.1	1587.76	1743.44	2603.99	1769.95	901.923	3851.38	947.815
Q3-1994	10061.1	1605.79	1753.37	2623.55	1780.99	913.445	3900.31	955.341
Q4-1994	10175.3	1614.94	1769.97	2658.2	1797.71	920.072	3882.46	958.916
Q1-1995	10210.1	1620.13	1778.44	2646.09	1820.28	928.56	3921.44	969.164
Q2-1995	10245.8	1625.98	1787.09	2669.18	1821.56	928.876	3969.99	975.829
Q3-1995	10333.5	1641.95	1789.32	2678.16	1829.66	930.089	4014.2	980.471
Q4-1995	10406.8	1646.57	1790.14	2676.88	1844.81	933.86	4023.8	987.378
Q1-1996	10475.1	1661.42	1802.15	2650.1	1852.81	934.441	4061.5	993.75
Q2-1996	10658	1666.71	1806.52	2687.95	1843.15	940.945	4107.56	1000.07
Q3-1996	10756.6	1678.1	1817.41	2704.31	1847.31	949.201	4106.39	1009.82
Q4-1996	10870.2	1694.07	1819.23	2719.38	1846.21	956.75	4153.69	1013.86
Q1-1997	10953.1	1726.73	1826.07	2703.02	1851.18	969.373	4168.08	1025.4
Q2-1997	11118.3	1741.99	1847.24	2741.2	1876.33	980.289	4137.03	1034.77
Q3-1997	11259.9	1750.54	1860.61	2751.78	1887.64	992.001	4150.43	1045.23
Q4-1997	11347.3	1768.69	1880.55	2771.35	1918.67	1001.51	4152.7	1060.33
Q1-1998	11459.5	1782.13	1897.27	2793.56	1906.2	1015.55	4102.5	1070.87
Q2-1998	11570.7	1798.29	1913.67	2784.58	1913.57	1015.99	4087.2	1078.96
Q3-1998	11722	1811.7	1928.05	2791.96	1916.12	1025.42	4093.58	1091.9
Q4-1998	11914.5	1829.32	1942.3	2791.31	1907.22	1039.27	4128.92	1103.37
Q1-1999	12009.6	1839.66	1953.7	2813.69	1918.49	1058.11	4072.1	1112.31
Q2-1999	12108.6	1840.8	1969.94	2819.78	1926.7	1066.99	4091.93	1129.08
Q3-1999	12261	1873.65	1992.75	2849.29	1942.79	1083.61	4111.44	1142.57
Q4-1999	12473.9	1899.41	2017.9	2884.9	1970.32	1099.02	4111.11	1156.01
Q1-2000	12510.1	1915.44	2039.08	2912	1993.23	1116.56	4191.21	1174.45
Q2-2000	12746.3	1927.15	2057.75	2941.51	2007.44	1129.86	4199.97	1188.86
Q3-2000	12761.7	1932.56	2071.54	2937.34	2018.27	1141.27	4203.4	1201.77
Q4-2000	12834.2	1935.77	2089.12	2939.59	2049.38	1143.3	4242.74	1215.03
Q1-2001	12797.7	1961.34	2099.62	2987.62	2056.87	1149.25	4267.84	1227.15
Q2-2001	12865.6	1976.77	2103.65	2990.19	2051.26	1152.22	4247.34	1236.91
Q3-2001	12824.9	1991.5	2110.42	2981.53	2042.57	1151.35	4200.25	1249.22
Q4-2001	12860.5	2000.37	2110.46	2985.06	2043.57	1158.41	4189.06	1258.07
Q1-2002	12978.9	2009.87	2116.7	2975.84	2041.9	1175.66	4194.01	1265.23
Q2-2002	13050.5	2023.13	2127.79	2983.53	2051.94	1182.36	4226.62	1274.75
Q3-2002	13114	2038.46	2135.41	2997.65	2056.35	1192.7	4243.4	1282.46
Q4-2002	13122.4	2056.74	2136.2	2991.23	2064.33	1199.3	4254.61	1292.09
Q1-2003	13190.3	2070.26	2139.41	2954.99	2058.16	1205.91	4249.92	1304.84
Q2-2003	13312.7	2089.86	2134.78	2955.63	2051.67	1204.12	4283.91	1313.7
Q3-2003	13535.7	2111.23	2148.55	2970.38	2054.03	1208.66	4301.23	1322.72
Q4-2003	13694	2128.29	2165.89	2981.29	2070.47	1216.95	4349.01	1336.3
Q1-2004	13772.7	2139.93	2185.07	2980.57	2080.04	1225.72	4382.81	1344.42
Q2-2004	13873.7	2148.13	2198.92	2990.83	2086.8	1240.21	4381.3	1354.85
Q3-2004	13999.8	2151.68	2207.47	2985.38	2088.79	1254.96	4404.19	1368.5
Q4-2004	14120.8	2157.1	2222.54	2988.27	2092.21	1263.97	4392.51	1376.92
Q1-2005	14271.3	2177.55	2228.43	2982.49	2087	1268.28	4413.65	1390.84
Q2-2005	14345.8	2201.7	2232.83	3002.38	2107.27	1277.31	4448.18	1405.02
Q3-2005	14466.3	2227.46	2243.76	3026.76	2121.33	1293.03	4490.56	1418.34
Q4-2005	14549	2260.83	2259.55	3038.31	2127.29	1305.83	4500.07	1433.18
Q1-2006	14723.8	2266.85	2278.43	3066.61	2134.88	1316.3	4503.47	1448.7
Q2-2006	14767.8	2271.9	2300.78	3115.69	2147.46	1316.93	4519.14	1463.83
Q3-2006	14781	2273.36	2301.24	3146.81	2155.08	1320.59	4511.36	1478.28
Q4-2006	14896.7	2281.38	2318.35	3187.86	2183.14	1325.58	4566.5	1492.32
Q1-2007	14905.9	2304.08	2336.39	3200.93	2186.65	1334.15	4600.08	1507.58
Q2-2007	15019.9	2320.7	2355.01	3224.67	2184.46	1347.02	4605.5	1519.81
Q3-2007	15120.9	2340.36	2362.34	3251.94	2183.66	1352.62	4584.71	1532.14
Q4-2007	15174.9	2359.83	2368.71	3260.92	2180.43	1354.51	4607.89	1545.32
Q1-2008	15071.3	2368.23	2378.68	3289.55	2204.63	1355.32	4621.83	1552.37
Q2-2008	15146.1	2350.7	2367.97	3280.57	2182.95	1360.02	4598.47	1553.24
Q3-2008	15073.5	2311.99	2359.72	3268.7	2152.42	1371.36	4539.65	1541.5
Q4-2008	14755	2261.78	2327.08	3205.5	2103.61	1355.5	4436.68	1525.97
Q1-2009	14550.6	2224.18	2288.74	3061.72	2045.71	1324.53	4219.79	1501.57
Q2-2009	14530.9	2219.96	2285.62	3063.97	2029.46	1309.92	4308.8	1487.03
Q3-2009	14578.4	2223.12	2289.29	3082.25	2041.03	1315.85	4309.96	1482.4
Q4-2009	14719.5	2230.82	2304.9	3110.48	2049.06	1331.39	4371.41	1481.47
Q1-2010	14783.2	2240.88	2314.47	3133.33	2057.68	1347.25	4410.23	1485.94
Q2-2010	14926	2260.12	2326.86	3197.49	2068.98	1354.18	4464.92	1488.65
Q3-2010	15026.8	2273.19	2341.15	3223.47	2079.91	1363.85	4546.09	1489.37
Q4-2010	15121.5	2276.15	2357.07	3250.41	2093.26	1379.27	4512.47	1489.35
Q1-2011	15063.1	2293.22	2381.72	3307.83	2099.74	1389.46	4444.58	1483.98
Q2-2011	15172.6	2296.6	2383.24	3313.6	2101.08	1392.1	4421.12	1476.87
Q3-2011	15204.6	2302.78	2388.28	3329.32	2088.8	1411.42	4528.66	1470.86
Q4-2011	15375.8	2306.61	2394.39	3329.96	2069.98	1422.58	4522	1462.14
Q1-2012	15477.8	2321.55	2395.95	3340.47	2051.81	1423.03	4575.74	1449.45
Q2-2012	15550.1	2320.3	2394.17	3343.68	2033	1427.73	4545.28	1435.66
Q3-2012	15568.7	2347.93	2397.67	3351.37	2023.84	1430.54	4527.27	1425.05
Q4-2012	15572.2	2342.56	2396.34	3336.3	2012.56	1432.29	4537.13	1411.13
Q1-2013	15681.1	2357.7	2395.57	3328.92	1991.9	1447.05	4591.55	1406.29
Q2-2013	15711.1	2370.63	2411.9	3358.43	1992.08	1456.43	4630.55	1405.11
Q3-2013	15832.4	2391.88	2411.72	3375.43	1998.78	1468.36	4665.95	1404.15
Q4-2013	15986.8	2403.08	2421.77	3389.23	1996.38	1483.16	4664.48	1408.16
Q1-2014	15950	2423.22	2423.59	3419.06	1997.08	1485.01	4709.88	1413.72
Q2-2014	16130.5	2443.39	2429.61	3413.28	1995.66	1502.81	4623.55	1419.19
Q3-2014	16336.6	2460.51	2440.46	3424.19	2000.45	1513.75	4621.71	1428.84
Q4-2014	16418.3	2476.89	2443.14	3454.66	2000.5	1520.63	4650.55	1439.56
Q1-2015	16549.7	2487.88	2453.42	3458.51	2005.05	1517.59	4720.26	1454.7
Q2-2015	16661.9	2502.03	2452.88	3473.91	2013.38	1515.39	4716.89	1467.05
Q3-2015	16729.5	2512.86	2462.19	3485.13	2017.86	1523.96	4720.97	1480.83
Q4-2015	16749.7	2531.54	2468.36	3499.89	2023.64	1525.54	4706.36	1494.41
Q1-2016	16774	2539.75	2484.55	3522.02	2028.31	1534.95	4746.28	1505.61
Q2-2016	16867	2543.72	2478.87	3538.38	2030.27	1530.92	4756.65	1517.46
Q3-2016	16983.1	2555.72	2483.79	3550.25	2034.94	1547.02	4765.62	1528.29
Q4-2016	17057.2	2574.67	2498.88	3565.01	2044.77	1555.6	4777.47	1538.72
Q1-2017	17109.7	2584.76	2518.18	3597.08	2055.14	1570.96	4809.68	1550.82
Q2-2017	17239.1	2590.26	2534.76	3619.86	2063.23	1588.57	4835.06	1564.23
Q3-2017	17373.5	2599.36	2552.05	3646.48	2070.31	1595.08	4859.03	1575.12
Q4-2017	17497.6	2608.6	2569.32	3668.61	2077.59	1601.86	4871.43	1585.77

## Sheet: CYCLES
Country	United States	United Kingdom	France	Germany	Italy	Canada	Japan	Spain
Quarter	US	UK	FR	DE	IT	CA	JP	ES
Q1-1960	1	0	0	0	0	0	0	0
Q2-1960	1	0	0	0	0	0	0	0
Q3-1960	1	0	0	0	0	0	0	0
Q4-1960	1	0	0	0	0	0	0	0
Q1-1961	0	0	0	0	0	0	0	0
Q2-1961	0	1	0	0	0	0	0	0
Q3-1961	0	1	0	0	0	0	0	0
Q4-1961	0	1	0	0	0	0	0	0
Q1-1962	0	0	0	0	0	0	0	0
Q2-1962	0	0	0	0	0	0	0	0
Q3-1962	0	0	0	1	0	0	0	0
Q4-1962	0	0	0	1	0	0	0	0
Q1-1963	0	0	0	1	0	0	0	0
Q2-1963	0	0	0	0	0	0	0	0
Q3-1963	0	0	0	0	0	0	0	0
Q4-1963	0	0	0	0	0	0	0	0
Q1-1964	0	0	0	0	1	0	0	0
Q2-1964	0	0	0	0	1	0	0	0
Q3-1964	0	0	0	0	1	0	0	0
Q4-1964	0	0	0	0	1	0	0	0
Q1-1965	0	0	0	0	0	0	0	0
Q2-1965	0	0	0	0	0	0	0	0
Q3-1965	0	0	0	0	0	0	0	0
Q4-1965	0	0	0	0	0	0	0	0
Q1-1966	0	0	0	0	0	0	0	0
Q2-1966	0	0	0	0	0	0	0	0
Q3-1966	0	0	0	1	0	0	0	0
Q4-1966	0	0	0	1	0	0	0	0
Q1-1967	0	0	0	1	0	0	0	0
Q2-1967	0	0	0	1	0	0	0	0
Q3-1967	0	0	0	0	0	0	0	0
Q4-1967	0	0	0	0	0	0	0	0
Q1-1968	0	0	0	0	0	0	0	0
Q2-1968	0	0	0	0	0	0	0	0
Q3-1968	0	0	0	0	0	0	0	0
Q4-1968	0	0	0	0	0	0	0	0
Q1-1969	0	0	0	0	0	0	0	0
Q2-1969	0	0	0	0	0	0	0	0
Q3-1969	1	0	0	0	0	0	0	0
Q4-1969	1	0	0	0	0	0	0	0
Q1-1970	1	0	0	0	0	0	0	0
Q2-1970	0	0	0	0	0	0	0	0
Q3-1970	0	0	0	0	0	0	0	0
Q4-1970	0	0	0	0	0	0	0	0
Q1-1971	0	0	0	0	0	0	0	0
Q2-1971	0	0	0	0	0	0	0	0
Q3-1971	0	0	0	0	0	0	0	0
Q4-1971	0	0	0	0	0	0	0	0
Q1-1972	0	0	0	0	0	0	0	0
Q2-1972	0	0	0	0	0	0	0	0
Q3-1972	0	0	0	0	0	0	0	0
Q4-1972	0	0	0	0	0	0	0	0
Q1-1973	0	0	0	0	0	0	0	0
Q2-1973	0	1	0	0	0	0	0	0
Q3-1973	0	1	0	0	0	0	0	0
Q4-1973	1	1	0	0	0	0	0	0
Q1-1974	1	1	0	1	0	0	0	0
Q2-1974	1	0	0	1	0	1	0	0
Q3-1974	1	1	1	1	1	1	0	0
Q4-1974	1	1	1	1	1	1	0	1
Q1-1975	1	1	1	1	1	1	0	1
Q2-1975	0	1	0	1	1	0	0	1
Q3-1975	0	1	0	0	0	0	0	0
Q4-1975	0	0	0	0	0	0	0	0
Q1-1976	0	0	0	0	0	0	0	0
Q2-1976	0	0	0	0	0	0	0	0
Q3-1976	0	0	0	0	0	0	0	0
Q4-1976	0	0	0	0	0	0	0	0
Q1-1977	0	0	0	0	1	0	0	0
Q2-1977	0	0	0	0	1	0	0	0
Q3-1977	0	0	0	0	1	0	0	0
Q4-1977	0	0	0	0	0	0	0	0
Q1-1978	0	0	0	0	0	0	0	0
Q2-1978	0	0	0	0	0	0	0	1
Q3-1978	0	0	0	0	0	0	0	1
Q4-1978	0	0	0	0	0	0	0	1
Q1-1979	0	0	0	0	0	0	0	1
Q2-1979	0	1	0	0	0	0	0	0
Q3-1979	0	1	0	0	0	0	0	0
Q4-1979	0	1	0	0	0	0	0	0
Q1-1980	1	1	1	1	0	1	0	0
Q2-1980	1	1	1	1	0	1	0	0
Q3-1980	1	1	1	1	0	1	0	0
Q4-1980	0	1	1	1	0	0	0	1
Q1-1981	0	1	0	0	0	0	0	1
Q2-1981	0	0	0	0	0	1	0	1
Q3-1981	1	0	0	0	0	1	0	0
Q4-1981	1	0	0	0	1	1	0	0
Q1-1982	1	0	0	1	1	1	0	0
Q2-1982	0	0	0	1	1	1	0	0
Q3-1982	0	0	0	1	1	1	0	0
Q4-1982	0	0	0	0	1	1	0	0
Q1-1983	0	0	0	0	0	0	0	0
Q2-1983	0	0	0	0	0	0	0	0
Q3-1983	0	0	0	0	0	0	0	0
Q4-1983	0	0	0	0	0	0	0	0
Q1-1984	0	0	0	0	0	0	0	0
Q2-1984	0	0	0	0	0	0	0	0
Q3-1984	0	0	0	0	0	0	0	0
Q4-1984	0	0	0	0	0	0	0	0
Q1-1985	0	0	0	0	0	0	0	0
Q2-1985	0	0	0	0	0	0	0	0
Q3-1985	0	0	0	0	0	0	0	0
Q4-1985	0	0	0	0	0	0	0	0
Q1-1986	0	0	0	0	0	0	0	0
Q2-1986	0	0	0	0	0	0	0	0
Q3-1986	0	0	0	0	0	0	0	0
Q4-1986	0	0	0	0	0	0	0	0
Q1-1987	0	0	0	0	0	0	0	0
Q2-1987	0	0	0	0	0	0	0	0
Q3-1987	0	0	0	0	0	0	0	0
Q4-1987	0	0	0	0	0	0	0	0
Q1-1988	0	0	0	0	0	0	0	0
Q2-1988	0	0	0	0	0	0	0	0
Q3-1988	0	0	0	0	0	0	0	0
Q4-1988	0	0	0	0	0	0	0	0
Q1-1989	0	0	0	0	0	0	0	0
Q2-1989	0	0	0	0	0	0	0	0
Q3-1989	0	0	0	0	0	0	0	0
Q4-1989	0	0	0	0	0	0	0	0
Q1-1990	0	0	0	0	0	1	0	0
Q2-1990	0	1	0	0	0	1	0	0
Q3-1990	1	1	0	0	0	1	0	0
Q4-1990	1	1	0	0	0	1	0	0
Q1-1991	1	1	0	1	0	1	0	0
Q2-1991	0	1	0	1	0	0	0	0
Q3-1991	0	1	0	1	0	0	0	0
Q4-1991	0	0	0	0	0	0	0	0
Q1-1992	0	0	0	1	1	0	0	1
Q2-1992	0	0	1	1	1	0	0	1
Q3-1992	0	0	1	1	1	0	0	1
Q4-1992	0	0	1	1	1	0	0	1
Q1-1993	0	0	1	1	1	0	1	1
Q2-1993	0	0	0	0	1	0	1	1
Q3-1993	0	0	0	0	1	0	1	0
Q4-1993	0	0	0	0	0	0	0	0
Q1-1994	0	0	0	0	0	0	0	0
Q2-1994	0	0	0	0	0	0	0	0
Q3-1994	0	0	0	0	0	0	0	0
Q4-1994	0	0	0	0	0	0	0	0
Q1-1995	0	0	0	0	0	0	0	0
Q2-1995	0	0	0	0	0	0	0	0
Q3-1995	0	0	0	1	0	0	0	0
Q4-1995	0	0	0	1	0	0	0	0
Q1-1996	0	0	0	1	0	0	0	0
Q2-1996	0	0	0	0	0	0	0	0
Q3-1996	0	0	0	0	0	0	0	0
Q4-1996	0	0	0	0	0	0	0	0
Q1-1997	0	0	0	0	0	0	1	0
Q2-1997	0	0	0	0	0	0	1	0
Q3-1997	0	0	0	0	0	0	1	0
Q4-1997	0	0	0	0	1	0	1	0
Q1-1998	0	0	0	0	1	0	1	0
Q2-1998	0	0	0	0	1	0	1	0
Q3-1998	0	0	0	0	1	0	1	0
Q4-1998	0	0	0	0	1	0	1	0
Q1-1999	0	0	0	0	0	0	1	0
Q2-1999	0	0	0	0	0	0	0	0
Q3-1999	0	0	0	0	0	0	0	0
Q4-1999	0	0	0	0	0	0	0	0
Q1-2000	0	0	0	0	0	0	0	0
Q2-2000	0	0	0	0	0	0	0	0
Q3-2000	0	0	0	0	0	0	0	0
Q4-2000	0	0	0	0	0	0	0	0
Q1-2001	0	0	0	0	1	0	1	0
Q2-2001	0	0	0	1	1	0	1	0
Q3-2001	0	0	0	1	1	0	1	0
Q4-2001	0	0	0	1	1	0	1	0
Q1-2002	0	0	0	1	1	0	0	0
Q2-2002	0	0	0	0	0	0	0	0
Q3-2002	0	0	0	1	0	0	0	0
Q4-2002	0	0	0	1	1	0	0	0
Q1-2003	0	0	0	1	1	0	0	0
Q2-2003	0	0	0	0	1	0	0	0
Q3-2003	0	0	0	0	0	0	0	0
Q4-2003	0	0	0	0	0	0	0	0
Q1-2004	0	0	0	0	0	0	0	0
Q2-2004	0	0	0	1	0	0	0	0
Q3-2004	0	0	0	1	0	0	0	0
Q4-2004	0	0	0	1	0	0	0	0
Q1-2005	0	0	0	1	0	0	0	0
Q2-2005	0	0	0	0	0	0	0	0
Q3-2005	0	0	0	0	0	0	0	0
Q4-2005	0	0	0	0	0	0	0	0
Q1-2006	0	0	0	0	0	0	0	0
Q2-2006	0	0	0	0	0	0	0	0
Q3-2006	0	0	0	0	0	0	0	0
Q4-2006	0	0	0	0	0	0	0	0
Q1-2007	0	0	0	0	0	0	0	0
Q2-2007	0	0	0	0	0	0	0	0
Q3-2007	0	0	0	0	0	0	0	0
Q4-2007	1	0	0	0	0	0	0	0
Q1-2008	1	1	1	1	1	0	1	0
Q2-2008	1	1	1	1	1	0	1	1
Q3-2008	1	1	1	1	1	1	1	1
Q4-2008	1	1	1	1	1	1	1	1
Q1-2009	1	1	1	1	1	1	1	1
Q2-2009	1	1	1	0	1	1	0	1
Q3-2009	0	0	0	0	0	0	0	1
Q4-2009	0	0	0	0	0	0	0	1
Q1-2010	0	0	0	0	0	0	0	0
Q2-2010	0	0	0	0	0	0	0	0
Q3-2010	0	0	0	0	0	0	1	1
Q4-2010	0	0	0	0	0	0	1	1
Q1-2011	0	0	0	0	0	0	1	1
Q2-2011	0	0	0	0	1	0	1	1
Q3-2011	0	0	0	0	1	0	0	1
Q4-2011	0	0	0	0	1	0	0	1
Q1-2012	0	0	0	0	1	0	1	1
Q2-2012	0	0	0	0	1	0	1	1
Q3-2012	0	0	1	1	1	0	1	1
Q4-2012	0	0	1	1	1	0	0	1
Q1-2013	0	0	1	1	1	0	0	1
Q2-2013	0	0	0	0	0	0	0	1
Q3-2013	0	0	0	0	1	0	0	1
Q4-2013	0	0	0	0	1	0	0	0
Q1-2014	0	0	0	0	1	0	1	0
Q2-2014	0	0	0	0	1	0	1	0
Q3-2014	0	0	0	0	0	0	1	0
Q4-2014	0	0	0	0	0	1	0	0
Q1-2015	0	0	0	0	0	1	0	0
Q2-2015	0	0	0	0	0	1	0	0
Q3-2015	0	0	0	0	0	0	0	0
Q4-2015	0	0	0	0	0	0	0	0
Q1-2016	0	0	0	0	0	0	0	0
Q2-2016	0	0	0	0	0	0	0	0
Q3-2016	0	0	0	0	0	0	0	0
Q4-2016	0	0	0	0	0	0	0	0
Q1-2017	0	0	0	0	0	0	0	0
Q2-2017	0	0	0	0	0	0	0	0
Q3-2017	0	0	0	0	0	0	0	0
Q4-2017	0	0	0	0	0	0	0	0

## Sheet: Contractions
Country	United States	United Kingdom	France	Germany	Italy	Canada	Japan	Spain		Frequency and Duration of Recessions																		Growth during Recessions											Median Duration of All Contractions :
Quarter	US	UK	FR	DE	IT	CA	JP	ES		US	UK	FR	DE	IT	CA	JP	ES		US	UK	FR	DE	IT	CA	JP	ES		US	UK	FR	DE	IT	CA	JP	ES				US	UK	FR	DE	IT	CA	JP	ES		US	UK
Q1-1960	1	0	0	0	0	0	0	0		1																		#N/A	#N/A	#N/A	#N/A	#N/A	#N/A	#N/A	#N/A		1	1960Q1-1982Q4	3	8	3.5	4	4	4	0	3
Q2-1960	1	0	0	0	0	0	0	0		2																		-1.52087									1	1983Q1-2014Q1	5	6	4	4.5	5.5	4	4	7
Q3-1960	1	0	0	0	0	0	0	0		3																		0.994789									1
Q4-1960	1	0	0	0	0	0	0	0		4									4									-4.87163									1		Frequency With Which Periods of Contraction Have Occurred :									1
Q1-1961	0	0	0	0	0	0	0	0																													2		US	UK	FR	DE	IT	CA	JP	ES
Q2-1961	0	1	0	0	0	0	0	0			1																										2	1960Q1-1982Q4	19.7917	21.875	7.29167	20.8333	16.6667	14.5833	0	10.4167
Q3-1961	0	1	0	0	0	0	0	0			2																		-2.09663								2	1983Q1-2014Q1	7.35294	8.82353	9.55882	24.2647	28.6765	8.82353	22.7941	19.1176
Q4-1961	0	1	0	0	0	0	0	0			3									3									-0.639516								2												1
Q1-1962	0	0	0	0	0	0	0	0																													3		Median Growth (Depth) of All Contractions :
Q2-1962	0	0	0	0	0	0	0	0																													3		US	UK	FR	DE	IT	CA	JP	ES
Q3-1962	0	0	0	1	0	0	0	0					1																								3	1960Q1-1982Q4	-2.54318	-1.89991	-1.80368	-2.01287	-1.42111	-2.71565	--	-0.592405
Q4-1962	0	0	0	1	0	0	0	0					2																		-0.865629						3	1983Q1-2014Q1	-2.33072	-2.15696	-1.13289	-1.09363	-1.26283	-3.60175	-2.60618	-2.37954
Q1-1963	0	0	0	1	0	0	0	0					3									3									-14.2427						4
Q2-1963	0	0	0	0	0	0	0	0																													4
Q3-1963	0	0	0	0	0	0	0	0																													4
Q4-1963	0	0	0	0	0	0	0	0																													4
Q1-1964	0	0	0	0	1	0	0	0						1																							5
Q2-1964	0	0	0	0	1	0	0	0						2																		-4.06813					5
Q3-1964	0	0	0	0	1	0	0	0						3																		-0.676189					5
Q4-1964	0	0	0	0	1	0	0	0						4									4									-1.67744					5
Q1-1965	0	0	0	0	0	0	0	0																													6
Q2-1965	0	0	0	0	0	0	0	0																													6
Q3-1965	0	0	0	0	0	0	0	0																													6
Q4-1965	0	0	0	0	0	0	0	0																													6
Q1-1966	0	0	0	0	0	0	0	0																													7
Q2-1966	0	0	0	0	0	0	0	0																													7
Q3-1966	0	0	0	1	0	0	0	0					1																								7
Q4-1966	0	0	0	1	0	0	0	0					2																		-6.29544						7
Q1-1967	0	0	0	1	0	0	0	0					3																		-1.99589						8
Q2-1967	0	0	0	1	0	0	0	0					4									4									-1.25228						8
Q3-1967	0	0	0	0	0	0	0	0																													8
Q4-1967	0	0	0	0	0	0	0	0																													8
Q1-1968	0	0	0	0	0	0	0	0																													9
Q2-1968	0	0	0	0	0	0	0	0																													9
Q3-1968	0	0	0	0	0	0	0	0																													9
Q4-1968	0	0	0	0	0	0	0	0																													9
Q1-1969	0	0	0	0	0	0	0	0																													10
Q2-1969	0	0	0	0	0	0	0	0																													10
Q3-1969	1	0	0	0	0	0	0	0		1																											10
Q4-1969	1	0	0	0	0	0	0	0		2																		-1.74992									10
Q1-1970	1	0	0	0	0	0	0	0		3									3									-0.709524									11											1
Q2-1970	0	0	0	0	0	0	0	0																													11
Q3-1970	0	0	0	0	0	0	0	0																													11
Q4-1970	0	0	0	0	0	0	0	0																													11
Q1-1971	0	0	0	0	0	0	0	0																													12
Q2-1971	0	0	0	0	0	0	0	0																													12
Q3-1971	0	0	0	0	0	0	0	0																													12
Q4-1971	0	0	0	0	0	0	0	0																													12
Q1-1972	0	0	0	0	0	0	0	0																													13
Q2-1972	0	0	0	0	0	0	0	0																													13
Q3-1972	0	0	0	0	0	0	0	0																													13
Q4-1972	0	0	0	0	0	0	0	0																													13
Q1-1973	0	0	0	0	0	0	0	0																													14
Q2-1973	0	1	0	0	0	0	0	0			1																										14
Q3-1973	0	1	0	0	0	0	0	0			2																		-3.84502								14
Q4-1973	1	1	0	0	0	0	0	0		1	3																		-1.70319								14
Q1-1974	1	1	0	1	0	0	0	0		2	4		1															-3.33643	-11.0532								15
Q2-1974	1	1	0	1	0	1	0	0		3	5		2		1													1.0502	5.73072		-0.307872						15
Q3-1974	1	1	1	1	1	1	0	0		4	6	1	3	1	2													-3.89168	2.58415		1.70056e-05		-0.470464				15
Q4-1974	1	1	1	1	1	1	0	1		5	7	2	4	2	3		1											-1.6031	-5.84966	-6.08681	-5.08299	-8.45013	-1.87283				15
Q1-1975	1	1	1	1	1	1	0	1		6	8	3	5	3	4		2		6		3			4				-4.86202	0.196645	-1.80368	-2.31471	-7.01966	-2.71565		-2.01272		16											1
Q2-1975	0	1	0	1	1	0	0	1			9		6	4			3					6	4			3			-6.59439		-2.01287	-0.20649			-0.332405		16
Q3-1975	0	1	0	0	0	0	0	0			10									10									-1.35187								16												1
Q4-1975	0	0	0	0	0	0	0	0																													16
Q1-1976	0	0	0	0	0	0	0	0																													17
Q2-1976	0	0	0	0	0	0	0	0																													17
Q3-1976	0	0	0	0	0	0	0	0																													17
Q4-1976	0	0	0	0	0	0	0	0																													17
Q1-1977	0	0	0	0	1	0	0	0						1																							18
Q2-1977	0	0	0	0	1	0	0	0						2																		-2.23368					18
Q3-1977	0	0	0	0	1	0	0	0						3									3									-3.759					18
Q4-1977	0	0	0	0	0	0	0	0																													18
Q1-1978	0	0	0	0	0	0	0	0																													19
Q2-1978	0	0	0	0	0	0	0	1									1																				19
Q3-1978	0	0	0	0	0	0	0	1									2																		-0.491139		19
Q4-1978	0	0	0	0	0	0	0	1									3																		-0.592405		19
Q1-1979	0	0	0	0	0	0	0	1									4									4									-0.63809		20
Q2-1979	0	1	0	0	0	0	0	0			1																										20
Q3-1979	0	1	0	0	0	0	0	0			2																		-8.84112								20
Q4-1979	0	1	0	0	0	0	0	0			3																		4.17732								20
Q1-1980	1	1	1	1	0	1	0	0		1	4	1	1		1														-3.90684
Q2-1980	1	1	1	1	0	1	0	0		2	5	2	2		2													-8.19591	-7.9981	-2.29657	-2.58354		-0.131768
Q3-1980	1	1	1	1	0	1	0	0		3	6	3	3		3				3					3				-0.60658	-0.496832	-0.00276612	-1.59004		-0.542113															1
Q4-1980	0	1	1	1	0	0	0	1			7	4	4				1				4	4							-4.27049	-0.240765	-0.531392
Q1-1981	0	1	0	0	0	0	0	1			8						2			8									-0.633247						-2.27118														1
Q2-1981	0	0	0	0	0	1	0	1							1		3									3									-0.443118
Q3-1981	1	0	0	0	0	1	0	0		1					2																		-3.60052
Q4-1981	1	0	0	0	1	1	0	0		2				1	3													-4.69393					-1.82687
Q1-1982	1	0	0	1	1	1	0	0		3			1	2	4				3									-6.74771				-0.158123	-4.78652															1
Q2-1982	0	0	0	1	1	1	0	0					2	3	5																-2.46999	-1.13831	-4.63779
Q3-1982	0	0	0	1	1	1	0	0					3	4	6							3									-3.97328	-0.214009	-3.54238
Q4-1982	0	0	0	0	1	1	0	0						5	7								5	7								-1.16477	-3.70867
Q1-1983	0	0	0	0	0	0	0	0
Q2-1983	0	0	0	0	0	0	0	0
Q3-1983	0	0	0	0	0	0	0	0
Q4-1983	0	0	0	0	0	0	0	0
Q1-1984	0	0	0	0	0	0	0	0
Q2-1984	0	0	0	0	0	0	0	0
Q3-1984	0	0	0	0	0	0	0	0
Q4-1984	0	0	0	0	0	0	0	0
Q1-1985	0	0	0	0	0	0	0	0
Q2-1985	0	0	0	0	0	0	0	0
Q3-1985	0	0	0	0	0	0	0	0
Q4-1985	0	0	0	0	0	0	0	0
Q1-1986	0	0	0	0	0	0	0	0
Q2-1986	0	0	0	0	0	0	0	0
Q3-1986	0	0	0	0	0	0	0	0
Q4-1986	0	0	0	0	0	0	0	0
Q1-1987	0	0	0	0	0	0	0	0
Q2-1987	0	0	0	0	0	0	0	0
Q3-1987	0	0	0	0	0	0	0	0
Q4-1987	0	0	0	0	0	0	0	0
Q1-1988	0	0	0	0	0	0	0	0
Q2-1988	0	0	0	0	0	0	0	0
Q3-1988	0	0	0	0	0	0	0	0
Q4-1988	0	0	0	0	0	0	0	0
Q1-1989	0	0	0	0	0	0	0	0
Q2-1989	0	0	0	0	0	0	0	0
Q3-1989	0	0	0	0	0	0	0	0
Q4-1989	0	0	0	0	0	0	0	0
Q1-1990	0	0	0	0	0	1	0	0							1
Q2-1990	0	1	0	0	0	1	0	0			1				2																		-1.6665
Q3-1990	1	1	0	0	0	1	0	0		1	2				3														-4.17354				-2.88142
Q4-1990	1	1	0	0	0	1	0	0		2	3				4													-3.42433	-1.34229				-3.60175
Q1-1991	1	1	0	1	0	1	0	0		3	4		1		5				3					5				-1.88149	-1.12596				-5.82965															1
Q2-1991	0	1	0	1	0	0	0	0			5		2																-0.487698		-1.66491
Q3-1991	0	1	0	1	0	0	0	0			6		3							6									-0.915863		-2.02736																		1
Q4-1991	0	0	0	1	0	0	0	0					4																		5.14961
Q1-1992	0	0	0	1	1	0	0	1					5	1			1														6.35748
Q2-1992	0	0	1	1	1	0	0	1				1	6	2			2														-2.62524	-0.229046			-5.25013
Q3-1992	0	0	1	1	1	0	0	1				2	7	3			3													-0.0979166	-1.1945	-0.889212			0.255385
Q4-1992	0	0	1	1	1	0	0	1				3	8	4			4													-0.869679	-0.84821	-2.76677			-2.61491
Q1-1993	0	0	1	1	1	0	1	1				4	9	5		1	5				4	9								-2.76174	-3.5373	-0.558252			-3.74946
Q2-1993	0	0	0	0	1	0	1	1						6		2	6									6						-0.966182		-2.54072	-0.0271003
Q3-1993	0	0	0	0	1	0	1	0						7		3							7		3							-0.631333		-2.88179
Q4-1993	0	0	0	0	0	0	0	0
Q1-1994	0	0	0	0	0	0	0	0
Q2-1994	0	0	0	0	0	0	0	0
Q3-1994	0	0	0	0	0	0	0	0
Q4-1994	0	0	0	0	0	0	0	0
Q1-1995	0	0	0	0	0	0	0	0
Q2-1995	0	0	0	0	0	0	0	0
Q3-1995	0	0	0	1	0	0	0	0					1
Q4-1995	0	0	0	1	0	0	0	0					2																		-0.191661
Q1-1996	0	0	0	1	0	0	0	0					3									3									-4.0223
Q2-1996	0	0	0	0	0	0	0	0
Q3-1996	0	0	0	0	0	0	0	0
Q4-1996	0	0	0	0	0	0	0	0
Q1-1997	0	0	0	0	0	0	1	0								1
Q2-1997	0	0	0	0	0	0	1	0								2																		-2.99094
Q3-1997	0	0	0	0	0	0	1	0								3																		1.29352
Q4-1997	0	0	0	0	1	0	1	0						1		4																		0.218713
Q1-1998	0	0	0	0	1	0	1	0						2		5																-2.60758		-4.86487
Q2-1998	0	0	0	0	1	0	1	0						3		6																1.54288		-1.49456
Q3-1998	0	0	0	0	1	0	1	0						4		7																0.533298		0.623902
Q4-1998	0	0	0	0	1	0	1	0						5		8							5									-1.86249		3.43839
Q1-1999	0	0	0	0	0	0	1	0								9									9									-5.54281
Q2-1999	0	0	0	0	0	0	0	0
Q3-1999	0	0	0	0	0	0	0	0
Q4-1999	0	0	0	0	0	0	0	0
Q1-2000	0	0	0	0	0	0	0	0
Q2-2000	0	0	0	0	0	0	0	0
Q3-2000	0	0	0	0	0	0	0	0
Q4-2000	0	0	0	0	0	0	0	0
Q1-2001	0	0	0	1	1	0	1	0					1	1		1
Q2-2001	0	0	0	1	1	0	1	0					2	2		2															0.343406	-1.09111		-1.92598
Q3-2001	0	0	0	1	1	0	1	0					3	3		3															-1.16023	-1.69926		-4.45954
Q4-2001	0	0	0	1	1	0	1	0					4	4		4									4						0.473088	0.19699		-1.06707
Q1-2002	0	0	0	1	1	0	0	0					5	5									5								-1.2377	-0.328134
Q2-2002	0	0	0	1	0	0	0	0					6																		1.03349
Q3-2002	0	0	0	1	0	0	0	0					7																		1.88777
Q4-2002	0	0	0	1	1	0	0	0					8	1																	-0.856987
Q1-2003	0	0	0	1	1	0	0	0					9	2								9									-4.87671	-1.19725
Q2-2003	0	0	0	0	1	0	0	0						3									3									-1.26283
Q3-2003	0	0	0	0	0	0	0	0
Q4-2003	0	0	0	0	0	0	0	0
Q1-2004	0	0	0	0	0	0	0	0
Q2-2004	0	0	0	1	0	0	0	0					1
Q3-2004	0	0	0	1	0	0	0	0					2																		-0.729989
Q4-2004	0	0	0	1	0	0	0	0					3																		0.38665
Q1-2005	0	0	0	1	0	0	0	0					4									4									-0.773608
Q2-2005	0	0	0	0	0	0	0	0
Q3-2005	0	0	0	0	0	0	0	0
Q4-2005	0	0	0	0	0	0	0	0
Q1-2006	0	0	0	0	0	0	0	0
Q2-2006	0	0	0	0	0	0	0	0
Q3-2006	0	0	0	0	0	0	0	0
Q4-2006	0	0	0	0	0	0	0	0
Q1-2007	0	0	0	0	0	0	0	0
Q2-2007	0	0	0	0	0	0	0	0
Q3-2007	0	0	0	0	0	0	0	0
Q4-2007	1	0	0	0	0	0	0	0		1
Q1-2008	1	1	1	1	1	0	1	0		2	1	1	1	1		1												-2.73977
Q2-2008	1	1	1	1	1	0	1	1		3	2	2	2	2		2	1											1.98058	-2.97162	-1.80548	-1.09363	-3.95395		-2.02684
Q3-2008	1	1	1	1	1	1	1	1		4	3	3	3	3	1	3	2											-1.92167	-6.64234	-1.39611	-1.44977	-5.63239		-5.14949	-3.03397
Q4-2008	1	1	1	1	1	1	1	1		5	4	4	4	4	2	4	3											-8.54253	-8.78175	-5.57223	-7.8088	-9.17566	-4.65321	-9.17743	-4.04918
Q1-2009	1	1	1	1	1	1	1	1		6	5	5	5	5	3	5	4					5			5			-5.58083	-6.70611	-6.64474	-18.3568	-11.1642	-9.24548	-20.0484	-6.44866
Q2-2009	1	1	1	0	1	1	0	1		7	6	6		6	4		5		7	6	6		6	4				-0.541843	-0.758964	-0.545344		-3.19045	-4.43818		-3.89214													1	1
Q3-2009	0	0	0	0	0	0	0	1									6																		-1.24639
Q4-2009	0	0	0	0	0	0	0	1									7									7									-0.251231
Q1-2010	0	0	0	0	0	0	0	0
Q2-2010	0	0	0	0	0	0	0	0
Q3-2010	0	0	0	0	0	0	1	1								1	1
Q4-2010	0	0	0	0	0	0	1	1								2	2																	-2.96914	-0.00591664
Q1-2011	0	0	0	0	0	0	1	1								3	3																	-6.06372	-1.44481
Q2-2011	0	0	0	0	1	0	1	1						1		4	4								4									-2.11693	-1.92115
Q3-2011	0	0	0	0	1	0	0	1						2			5															-2.34502			-1.62925
Q4-2011	0	0	0	0	1	0	0	1						3			6															-3.6208			-2.37954
Q1-2012	0	0	0	0	1	0	1	1						4		1	7															-3.52625			-3.48661
Q2-2012	0	0	0	0	1	0	1	1						5		2	8															-3.68403		-2.67164	-3.82405
Q3-2012	0	0	1	1	1	0	1	1				1	1	6		3	9								3							-1.80605		-1.58809	-2.96642
Q4-2012	0	0	1	1	1	0	0	1				2	2	7			10													-0.221284	-1.80342	-2.23682			-3.92731
Q1-2013	0	0	1	1	1	0	0	1				3	3	8			11				3	3								-0.129203	-0.885525	-4.12563			-1.37463
Q2-2013	0	0	0	0	1	0	0	1						9			12															0.0351467			-0.335383
Q3-2013	0	0	0	0	1	0	0	1						10			13									13						1.34272			-0.272903
Q4-2013	0	0	0	0	1	0	0	0						11																		-0.48031
Q1-2014	0	0	0	0	1	0	1	0						12		1																0.140876
Q2-2014	0	0	0	0	1	0	1	0						13		2							13									-0.285226		-7.39985
Q3-2014	0	0	0	0	0	0	1	0								3									3									-0.159217
Q4-2014	0	0	0	0	0	1	0	0							1
Q1-2015	0	0	0	0	0	1	0	0							2																		-0.801586
Q2-2015	0	0	0	0	0	1	0	0							3									3									-0.579193
Q3-2015	0	0	0	0	0	0	0	0
Q4-2015	0	0	0	0	0	0	0	0
Q1-2016	0	0	0	0	0	0	0	0
Q2-2016	0	0	0	0	0	0	0	0
Q3-2016	0	0	0	0	0	0	0	0
Q4-2016	0	0	0	0	0	0	0	0
Q1-2017	0	0	0	0	0	0	0	0
Q2-2017	0	0	0	0	0	0	0	0
Q3-2017	0	0	0	0	0	0	0	0
Q4-2017	0	0	0	0	0	0	0	0
[truncated: 14 more columns]

## Sheet: Expansions
Country	United States	United Kingdom	France	Germany	Italy	Canada	Japan	Spain		Frequency and Duration of Expansions																		Growth during Expansions											Median Duration of All Expansions :
Quarter	US	UK	FR	DE	IT	CA	JP	ES		US	UK	FR	DE	IT	CA	JP	ES		US	UK	FR	DE	IT	CA	JP	ES		US	UK	FR	DE	IT	CA	JP	ES				US	UK	FR	DE	IT	CA	JP	ES		US	UK
Q1-1960	0	1	1	1	1	1	1	1			1	1	1	1	1	1	1											#N/A	#N/A	#N/A	#N/A	#N/A	#N/A	#N/A	#N/A		1	1960Q1-1982Q4	14	12.5	19	11.5	16	11.5	96	10.5
Q2-1960	0	1	1	1	1	1	1	1			2	2	2	2	2	2	2												-2.8779	1.50003	7.05602	5.82775	-7.76799	0.735143	8.14008		1	1983Q1-2014Q1	34	34	26	13	14	22.5	10	24.5
Q3-1960	0	1	1	1	1	1	1	1			3	3	3	3	3	3	3												6.02199	2.98309	13.5931	5.83182	6.05909	13.5102	11.0358		1
Q4-1960	0	1	1	1	1	1	1	1			4	4	4	4	4	4	4												2.43516	4.713	4.06752	0.306898	1.32116	15.0854	7.97211		1		Frequency With Which Periods of Expansion Have Occurred :
Q1-1961	1	1	1	1	1	1	1	1		1	5	5	5	5	5	5	5			5								2.71057	6.46397	6.38231	4.02658	14.0804	-1.62189	11.9746	11.2729		2		US	UK	FR	DE	IT	CA	JP	ES			1
Q2-1961	1	0	1	1	1	1	1	1		2		6	6	6	6	6	6											7.36719	1.60723	6.35064	-2.16318	8.37371	9.935	8.44083	17.3813		2	1960Q1-1982Q4	80.2083	78.125	92.7083	79.1667	83.3333	85.4167	100	89.5833
Q3-1961	1	0	1	1	1	1	1	1		3		7	7	7	7	7	7											6.6146		6.3187	8.12693	9.21559	9.54718	7.59845	8.08758		2	1983Q1-2014Q1	92.6471	91.1765	90.4412	75.7353	71.3235	91.1765	77.2059	80.8824
Q4-1961	1	0	1	1	1	1	1	1		4		8	8	8	8	8	8											8.02584		6.739	1.81828	7.58029	5.56066	17.944	11.1305		2
Q1-1962	1	1	1	1	1	1	1	1		5	1	9	9	9	9	9	9											7.1404	1.88274	7.13707	5.85042	5.87636	10.4536	5.33796	9.35219		3		Median Growth (Depth) of All Expansions :
Q2-1962	1	1	1	1	1	1	1	1		6	2	10	10	10	10	10	10					10						4.28687	3.70075	6.41107	4.1478	4.28354	2.89651	5.54997	9.19813		3		US	UK	FR	DE	IT	CA	JP	ES
Q3-1962	1	1	1	0	1	1	1	1		7	3	11		11	11	11	11											3.79227	2.42288	5.71808	9.4679	2.3943	5.2148	4.85999	9.67802		3	1960Q1-1982Q4	3.89263	2.76213	3.84944	4.25842	5.65697	4.512	5.73095	3.90835
Q4-1962	1	1	1	0	1	1	1	1		8	4	12		12	12	12	12											1.54921	-1.44491	4.9761		5.9617	8.05021	8.2721	1.07162		3	1983Q1-2014Q1	3.00173	2.62506	2.1448	2.75895	1.72985	2.83759	2.50022	3.29519
Q1-1963	1	1	1	0	1	1	1	1		9	5	13		13	13	13	13											4.42643	2.05712	-6.71932		2.64654	2.39209	5.43036	22.3742		4
Q2-1963	1	1	1	1	1	1	1	1		10	6	14	1	14	14	14	14											5.18073	16.7975	17.4746	17.5471	10.818	5.82198	11.6016	0.331419		4
Q3-1963	1	1	1	1	1	1	1	1		11	7	15	2	15	15	15	15											7.73312	2.02966	12.9822	13.6417	6.51192	3.06231	11.5601	8.53915		4
Q4-1963	1	1	1	1	1	1	1	1		12	8	16	3	16	16	16	16						16					2.8446	8.78555	1.24322	1.9312	4.09264	12.3704	13.5494	7.37808		4
Q1-1964	1	1	1	1	0	1	1	1		13	9	17	4		17	17	17											8.55915	2.39948	7.46041	5.46611	5.88562	9.79341	12.5614	2.25556		5
Q2-1964	1	1	1	1	0	1	1	1		14	10	18	5		18	18	18											4.7286	6.84643	3.81741	4.85749		1.37474	9.53438	6.53834		5
Q3-1964	1	1	1	1	0	1	1	1		15	11	19	6		19	19	19											5.39661	1.57448	4.87519	4.13493		4.18388	6.13259	2.99394		5
Q4-1964	1	1	1	1	0	1	1	1		16	12	20	7		20	20	20											1.41595	6.04031	3.59872	5.40466		2.10525	4.97039	8.60345		5
Q1-1965	1	1	1	1	1	1	1	1		17	13	21	8	1	21	21	21											9.74558	-1.11726	0.886997	6.49327	5.36445	12.3719	3.23687	8.42334		6
Q2-1965	1	1	1	1	1	1	1	1		18	14	22	9	2	22	22	22											5.43138	0.425245	9.83058	6.263	7.89685	3.73487	4.96505	1.70284		6
Q3-1965	1	1	1	1	1	1	1	1		19	15	23	10	3	23	23	23											8.04267	3.3103	5.73872	2.65467	5.29306	5.36748	8.96251	4.05155		6
Q4-1965	1	1	1	1	1	1	1	1		20	16	24	11	4	24	24	24											9.32388	2.4694	5.53045	2.38667	5.96469	9.71765	6.17031	11.7823		6
Q1-1966	1	1	1	1	1	1	1	1		21	17	25	12	5	25	25	25											9.75754	0.658863	3.59264	7.19852	3.84988	7.57685	10.5636	-2.73138		7
Q2-1966	1	1	1	1	1	1	1	1		22	18	26	13	6	26	26	26					13						1.63457	2.31678	6.00479	1.22805	5.65697	8.33633	15.3523	20.1538		7
Q3-1966	1	1	1	0	1	1	1	1		23	19	27		7	27	27	27											2.83931	1.31714	4.53589	0.490405	11.1434	-0.153479	9.61025	7.85709		7
Q4-1966	1	1	1	0	1	1	1	1		24	20	28		8	28	28	28											3.41478	-1.67665	2.17784		1.91219	4.79702	7.91464	1.08212		7
Q1-1967	1	1	1	0	1	1	1	1		25	21	29		9	29	29	29											3.65551	5.40966	6.79649		7.90172	-0.928826	10.4609	1.10045		8
Q2-1967	1	1	1	0	1	1	1	1		26	22	30		10	30	30	30											0.350711	5.575	4.35452		8.51224	8.30532	10.6207	4.77706		8
Q3-1967	1	1	1	1	1	1	1	1		27	23	31	1	11	31	31	31											3.43826	1.75577	3.80659	9.54361	6.1172	1.33021	13.6334	6.80277		8
Q4-1967	1	1	1	1	1	1	1	1		28	24	32	2	12	32	32	32											3.2069	2.12452	3.88003	5.11093	7.82674	1.51067	7.65962	-2.8868		8
Q1-1968	1	1	1	1	1	1	1	1		29	25	33	3	13	33	33	33											8.04147	14.2845	11.4724	4.65404	0.971329	3.23294	9.43198	8.44598		9
Q2-1968	1	1	1	1	1	1	1	1		30	26	34	4	14	34	34	34											6.69839	-1.73543	-31.5348	3.0971	8.2921	10.718	13.4185	11.9556		9
Q3-1968	1	1	1	1	1	1	1	1		31	27	35	5	15	35	35	35											2.87072	7.88135	43.0868	8.68579	9.50394	5.36503	8.95625	3.21226		9
Q4-1968	1	1	1	1	1	1	1	1		32	28	36	6	16	36	36	36											1.77639	1.59857	4.07751	5.99262	9.25587	5.47587	22.1637	15.8936		9
Q1-1969	1	1	1	1	1	1	1	1		33	29	37	7	17	37	37	37											6.17177	-0.891219	0.734307	9.94121	6.21608	5.14993	3.50338	13.9461		10
Q2-1969	1	1	1	1	1	1	1	1		34	30	38	8	18	38	38	38		34									1.28084	2.91254	9.69373	5.09971	7.15856	1.91693	11.4789	-1.35373		10											1
Q3-1969	0	1	1	1	1	1	1	1			31	39	9	19	39	39	39											2.4958	2.24996	3.76377	8.50204	0.955496	4.19715	9.46963	7.39307		10
Q4-1969	0	1	1	1	1	1	1	1			32	40	10	20	40	40	40												2.04142	3.14858	6.10022	-8.16819	5.59388	15.3148	4.45304		10
Q1-1970	0	1	1	1	1	1	1	1			33	41	11	21	41	41	41												-2.56327	7.57335	-6.43412	23.2942	2.51816	12.0726	7.40961		11
Q2-1970	1	1	1	1	1	1	1	1		1	34	42	12	22	42	42	42											0.707177	9.32243	5.01657	15.5953	2.90934	-0.164765	4.82316	0.634952		11
Q3-1970	1	1	1	1	1	1	1	1		2	35	43	13	23	43	43	43											3.5278	3.94612	5.47136	7.40243	7.94591	4.06007	10.5798	2.03912		11
Q4-1970	1	1	1	1	1	1	1	1		3	36	44	14	24	44	44	44											-4.13568	3.48047	6.23194	3.37614	0.447034	0.67409	-1.28938	3.14373		11
Q1-1971	1	1	1	1	1	1	1	1		4	37	45	15	25	45	45	45											10.5695	-2.36844	0.516	-7.75918	-2.09765	-2.40371	3.62873	3.11154		12
Q2-1971	1	1	1	1	1	1	1	1		5	38	46	16	26	46	46	46											2.27626	7.08125	7.22235	8.30769	1.68442	11.5279	6.39911	7.72725		12
Q3-1971	1	1	1	1	1	1	1	1		6	39	47	17	27	47	47	47											3.11513	6.89969	6.4698	6.86097	5.81661	10.875	4.84594	7.29272		12
Q4-1971	1	1	1	1	1	1	1	1		7	40	48	18	28	48	48	48											1.16657	1.57945	3.41252	-0.336869	2.25179	4.51701	3.62615	7.97422		12
Q1-1972	1	1	1	1	1	1	1	1		8	41	49	19	29	49	49	49											7.11344	0.419706	5.20517	0.404205	4.39501	-1.56132	12.8242	6.43796		13
Q2-1972	1	1	1	1	1	1	1	1		9	42	50	20	30	50	50	50											9.15723	10.5658	1.53376	6.47924	-0.181275	11.2152	7.45866	9.34141		13
Q3-1972	1	1	1	1	1	1	1	1		10	43	51	21	31	51	51	51											3.6695	1.08589	3.53617	9.23498	5.35665	0.909405	8.44819	8.69241		13
Q4-1972	1	1	1	1	1	1	1	1		11	44	52	22	32	52	52	52											6.58792	6.20946	6.58642	6.16779	1.89651	9.45624	9.93804	7.84662		13
Q1-1973	1	1	1	1	1	1	1	1		12	45	53	23	33	53	53	53			45								9.72804	19.3463	7.89078	5.49301	3.58983	10.4097	13.1605	7.29568		14												1
Q2-1973	1	0	1	1	1	1	1	1		13		54	24	34	54	54	54											4.50952	0.569991	4.29835	2.94465	11.8106	4.34192	3.64146	7.06832		14
Q3-1973	1	0	1	1	1	1	1	1		14		55	25	35	55	55	55		14									-2.17951		3.42071	1.30871	12.5289	1.35276	1.16477	6.55265		14											1
Q4-1973	0	0	1	1	1	1	1	1				56	26	36	56	56	56					26						3.71238		5.08087	0.994238	9.65305	7.46445	4.91333	6.52814		14
Q1-1974	0	0	1	0	1	1	1	1				57		37	57	57	57							57						3.81886	3.36854	3.2309	2.90235	-13.9856	6.73626		15
Q2-1974	0	0	1	0	1	0	1	1				58		38		58	58				58		38							1.99757		3.80213	4.40204	2.87027	5.0227		15
Q3-1974	0	0	0	0	0	0	1	1								59	59									59				3.75612		0.666295		5.08485	2.81283		15
Q4-1974	0	0	0	0	0	0	1	0								60																		-2.17411	0.264573		15
Q1-1975	0	0	0	0	0	0	1	0								61																		0.523994			16
Q2-1975	1	0	1	0	0	1	1	0		1		1			1	62												3.07001		1.00973			5.19757	8.7832			16
Q3-1975	1	0	1	1	1	1	1	1		2		2	1	1	2	63	1											6.55642		1.54642	4.32774	5.64567	7.39922	4.52529	1.74358		16
Q4-1975	1	1	1	1	1	1	1	1		3	1	3	2	2	3	64	2											5.35666	4.49199	5.3652	7.78399	4.45641	4.58829	4.18567	2.80151		16
Q1-1976	1	1	1	1	1	1	1	1		4	2	4	3	3	4	65	3											8.93217	6.37427	5.82825	3.57796	6.98597	6.89313	3.3738	3.95575		17
Q2-1976	1	1	1	1	1	1	1	1		5	3	5	4	4	5	66	4											3.01096	-0.708854	4.74084	5.89836	7.16524	8.55342	2.35653	4.59051		17
Q3-1976	1	1	1	1	1	1	1	1		6	4	6	5	5	6	67	5											2.02866	4.94576	1.8872	0.119458	10.0388	1.73815	5.5847	3.86094		17
Q4-1976	1	1	1	1	1	1	1	1		7	5	7	6	6	7	68	6						6					2.99112	8.35127	4.95258	7.33859	6.87918	0.844336	0.474849	3.05984		17
Q1-1977	1	1	1	1	0	1	1	1		8	6	8	7		8	69	7											4.62721	0.198819	4.39753	3.40127	0.158406	5.48928	8.65589	3.15646		18
Q2-1977	1	1	1	1	0	1	1	1		9	7	9	8		9	70	8											7.77453	-2.91221	1.73542	2.26139		2.26629	2.80427	1.81042		18
Q3-1977	1	1	1	1	0	1	1	1		10	8	10	9		10	71	9											7.01465	2.76213	1.82958	-0.115637		1.92047	2.71848	1.32699		18
Q4-1977	1	1	1	1	1	1	1	1		11	9	11	10	1	11	72	10											0.0420264	6.87475	0.91197	6.82401	3.41281	6.321	5.38984	2.66333		18
Q1-1978	1	1	1	1	1	1	1	1		12	10	12	11	2	12	73	11									11		1.38937	3.43631	5.51831	1.64508	6.48433	3.40723	7.48508	2.48925		19
Q2-1978	1	1	1	1	1	1	1	0		13	11	13	12	3	13	74												15.2574	4.80796	6.59579	1.58239	6.85988	3.65389	3.86921	0.809585		19
Q3-1978	1	1	1	1	1	1	1	0		14	12	14	13	4	14	75												3.89263	5.37549	-0.35199	5.21127	2.09935	2.87209	5.14078			19
Q4-1978	1	1	1	1	1	1	1	0		15	13	15	14	5	15	76												5.32926	3.63021	3.39004	4.64929	6.04935	3.3854	5.73095			19
Q1-1979	1	1	1	1	1	1	1	0		16	14	16	15	6	16	77				14								0.793954	-1.5723	3.42551	0.494316	6.27049	3.42593	5.93687			20												1
Q2-1979	1	0	1	1	1	1	1	1		17		17	16	7	17	78	1											0.483949	17.3511	3.80581	12.2321	2.89786	5.39121	7.24296	0.621313		20
Q3-1979	1	0	1	1	1	1	1	1		18		18	17	8	18	79	2											2.86192		4.54646	2.94336e-05	6.86243	2.57992	3.03872	0.960852		20
Q4-1979	1	0	1	1	1	1	1	1		19		19	18	9	19	80	3		19		19	18		19				1.03419		0.760105	2.44449	9.30647	2.68086	1.73604	1.40361		20											1
Q1-1980	0	0	0	0	1	0	1	1						10		81	4											1.29179		4.4498	3.19217	-0.735075	2.81719	1.52761	2.66962
Q2-1980	0	0	0	0	1	0	1	1						11		82	5															3.09221		-2.11416	1.35731
Q3-1980	0	0	0	0	1	0	1	1						12		83	6									6						0.334567		8.86089	-1.58925
Q4-1980	1	0	0	0	1	1	1	0		1				13	1	84												7.34522				3.39477	5.54269	8.41203	2.31336
Q1-1981	1	0	1	1	1	1	1	0		2		1	1	14	2	85								2				8.19355		1.37485	4.73137	-2.28851	8.79313	2.44473
Q2-1981	1	1	1	1	1	0	1	0		3	1	2	2	15		86			3									-2.9317	0.969947	1.96355	-0.999779	0.779228	4.38934	4.86474														1
Q3-1981	0	1	1	1	1	0	1	1			2	3	3	16		87	1						16					4.56385	4.32763	3.19503	1.05235	0.185197		-0.890407	1.7748
Q4-1981	0	1	1	1	0	0	1	1			3	4	4			88	2					4							0.459598	2.1674	-0.315449	3.23348		2.90983	-0.399563
Q1-1982	0	1	1	0	0	0	1	1			4	5				89	3												0.624205	3.16341	1.49588			6.08289	1.64301
Q2-1982	1	1	1	0	0	0	1	1		1	5	6				90	4											2.17319	4.4712	2.77046				2.73698	1.51629
Q3-1982	1	1	1	0	0	0	1	1		2	6	7				91	5											-1.4432	1.0544	0.217449				1.745	2.6838
Q4-1982	1	1	1	1	0	0	1	1		3	7	8	1			92	6											0.39	2.8108	2.38549	0.957209			5.52024	1.40751
Q1-1983	1	1	1	1	1	1	1	1		4	8	9	2	1	1	93	7											5.2052	7.17744	1.61019	3.60875	1.11751	6.52511	0.251964	1.45919
Q2-1983	1	1	1	1	1	1	1	1		5	9	10	3	2	2	94	8											9.02526	3.39666	0.044893	4.1891	-0.481925	7.87124	2.99572	2.46284
Q3-1983	1	1	1	1	1	1	1	1		6	10	11	4	3	3	95	9											7.75603	4.38008	0.61214	-0.834341	7.38041	4.50698	5.94179	0.587808
Q4-1983	1	1	1	1	1	1	1	1		7	11	12	5	4	4	96	10		7	11	12	5	4	4	96	10		8.16488	3.4448	1.87543	5.49518	8.77034	5.05671	3.31838	2.57616													1	1
Q1-1984	1	1	1	1	1	1	1	1		1	1	1	1	1	1	1	1											7.86941	2.74793	2.67036	5.25561	-0.785219	6.80188	4.58017	3.29519
Q2-1984	1	1	1	1	1	1	1	1		2	2	2	2	2	2	2	2											6.96438	-3.50362	1.16611	-6.35098	1.28579	7.74873	6.01166	-1.23505
Q3-1984	1	1	1	1	1	1	1	1		3	3	3	3	3	3	3	3											3.91596	2.5943	2.25229	10.7475	4.68236	1.69387	4.85841	3.46858
Q4-1984	1	1	1	1	1	1	1	1		4	4	4	4	4	4	4	4											3.17787	7.8677	0.970609	3.35316	0.0641719	6.25528	0.68989	0.510202
Q1-1985	1	1	1	1	1	1	1	1		5	5	5	5	5	5	5	5											3.95688	3.36042	0.726415	-2.18625	2.2804	6.03026	9.68496	4.43922
Q2-1985	1	1	1	1	1	1	1	1		6	6	6	6	6	6	6	6											3.64529	8.43327	2.6868	3.98903	5.24894	1.28279	8.01838	-0.375893
Q3-1985	1	1	1	1	1	1	1	1		7	7	7	7	7	7	7	7											6.17495	0.378696	2.57109	5.176	3.1913	5.03228	5.20124	4.12532
Q4-1985	1	1	1	1	1	1	1	1		8	8	8	8	8	8	8	8											2.98951	0.970289	1.59194	2.39274	2.65833	6.10736	5.27846	4.5677
Q1-1986	1	1	1	1	1	1	1	1		9	9	9	9	9	9	9	9											3.69035	4.53135	1.47222	-2.29477	2.48498	-0.0885657	1.58723	1.12658
Q2-1986	1	1	1	1	1	1	1	1		10	10	10	10	10	10	10	10											1.83208	2.91681	4.29341	4.57646	2.57892	2.29629	-0.98467	9.41456
Q3-1986	1	1	1	1	1	1	1	1		11	11	11	11	11	11	11	11											4.00612	1.74278	1.63377	2.94211	3.9727	0.509834	2.3365	-2.83014
Q4-1986	1	1	1	1	1	1	1	1		12	12	12	12	12	12	12	12											2.06569	6.99735	0.961212	3.96868	1.639	-2.89202	3.14241	2.54709
Q1-1987	1	1	1	1	1	1	1	1		13	13	13	13	13	13	13	13											2.78718	3.55281	1.08247	-10.1674	1.63515	9.15802	-0.286359	8.10996
Q2-1987	1	1	1	1	1	1	1	1		14	14	14	14	14	14	14	14											4.46505	5.73707	4.55375	8.88066	6.01212	5.15311	8.29574	5.93991
Q3-1987	1	1	1	1	1	1	1	1		15	15	15	15	15	15	15	15											3.61145	9.55589	3.04082	2.75895	1.1529	6.08121	7.92157	8.17667
Q4-1987	1	1	1	1	1	1	1	1		16	16	16	16	16	16	16	16											6.5483	4.50141	6.0657	6.34895	4.28099	5.16032	10.1697	8.10037
Q1-1988	1	1	1	1	1	1	1	1		17	17	17	17	17	17	17	17											2.24326	7.17004	5.15322	-3.64444	5.84394	5.80844	9.4356	1.28411
Q2-1988	1	1	1	1	1	1	1	1		18	18	18	18	18	18	18	18											5.25052	2.38658	2.6538	7.18639	2.53304	3.53834	-0.584245	4.86304
Q3-1988	1	1	1	1	1	1	1	1		19	19	19	19	19	19	19	19											2.3022	6.07152	5.25537	4.50682	5.22163	0.0327994	8.82641	7.14739
Q4-1988	1	1	1	1	1	1	1	1		20	20	20	20	20	20	20	20											5.26361	3.43151	3.91444	4.68267	4.74731	2.80083	4.19235	-0.898135
Q1-1989	1	1	1	1	1	1	1	1		21	21	21	21	21	21	21	21											4.01474	1.73753	5.37307	4.15888	2.47713	4.53636	10.6492	9.32303
Q2-1989	1	1	1	1	1	1	1	1		22	22	22	22	22	22	22	22											3.1331	2.60053	3.19939	1.60696	1.72586	1.53364	-5.25636	3.91711
Q3-1989	1	1	1	1	1	1	1	1		23	23	23	23	23	23	23	23											2.9749	0.373687	4.68686	3.6364	4.14816	1.44109	6.93726	5.32314
Q4-1989	1	1	1	1	1	1	1	1		24	24	24	24	24	24	24	24							24				0.845425	0.360897	4.72886	4.60857	4.09552	-0.858026	12.2058	-0.664571
Q1-1990	1	1	1	1	1	0	1	1		25	25	25	25	25		25	25			25								4.35572	2.71631	2.75291	8.21783	1.5913	3.73701	-1.90824	3.48882														1
Q2-1990	1	0	1	1	1	0	1	1		26		26	26	26		26	26		26									1.54377	2.05524	1.8915	1.96182	1.21728		12.4211	6.74141													1
Q3-1990	0	0	1	1	1	0	1	1				27	27	27		27	27											0.0987621		1.44968	8.33627	0.640864		6.65188	-1.19566
Q4-1990	0	0	1	1	1	0	1	1				28	28	28		28	28					28								1.15232	6.98042	-2.60681		-0.760791	14.8477
Q1-1991	0	0	1	0	1	0	1	1				29		29		29	29													-0.648378	11.4172	7.81733		3.47009	-7.76184
Q2-1991	1	0	1	0	1	1	1	1		1		30		30	1	30	30											3.09228		2.26955		-2.19498	1.82523	4.71724	4.8476
Q3-1991	1	0	1	0	1	1	1	1		2		31		31	2	31	31											1.91546		0.753666		0.143257	0.510459	-0.886632	3.00974
Q4-1991	1	1	1	0	1	1	1	1		3	1	32		32	3	32	32						32			32		1.74245	0.636317	2.15373		4.66725	0.720237	2.80026	1.98512
Q1-1992	1	1	1	0	0	1	1	0		4	2	33			4	33					33							4.69728	-0.0320014	3.56819		1.07434	0.262877	0.124257	3.97103
Q2-1992	1	1	0	0	0	1	1	0		5	3				5	34												4.38651	-0.48728	0.0379015			0.481293	1.39758
Q3-1992	1	1	0	0	0	1	1	0		6	4				6	35												3.86965	2.5537				2.14695	0.471012
Q4-1992	1	1	0	0	0	1	1	0		7	5				7	36									36			3.98813	2.79738				2.25705	-2.55824
Q1-1993	1	1	0	0	0	1	0	0		8	6				8													0.745035	2.91853				2.53805	4.48226
Q2-1993	1	1	1	1	0	1	0	0		9	7	1	1		9													2.37161	2.02806	0.561728	0.201542		3.6226
Q3-1993	1	1	1	1	0	1	0	1		10	8	2	2		10		1											1.94588	3.20616	0.61498	2.81089		3.80174		4.78402
Q4-1993	1	1	1	1	1	1	1	1		11	9	3	3	1	11	1	2											5.30451	2.71273	0.903786	-0.250166	2.92182	1.71662	2.51216	1.50455
Q1-1994	1	1	1	1	1	1	1	1		12	10	4	4	2	12	2	3											3.90266	4.83862	2.62041	4.86252	3.03513	5.84295	3.29385	3.29476
Q2-1994	1	1	1	1	1	1	1	1		13	11	5	5	3	13	3	4											5.42977	4.6162	4.53729	1.38203	2.88413	5.8192	-2.09143	0.876049
Q3-1994	1	1	1	1	1	1	1	1		14	12	6	6	4	14	4	5											2.3519	4.51703	2.27169	2.99443	2.48614	5.07763	5.0498	3.16344
Q4-1994	1	1	1	1	1	1	1	1		15	13	7	7	5	15	5	6											4.51631	2.271	3.77032	5.24725	3.73827	2.89186	-1.83483	1.4941
Q1-1995	1	1	1	1	1	1	1	1		16	14	8	8	6	16	6	7											1.3649	1.285	1.90806	-1.82638	4.99103	3.67289	3.99598	4.25226
Q2-1995	1	1	1	1	1	1	1	1		17	15	9	9	7	17	7	8					9						1.39516	1.44039	1.94154	3.4762	0.280507	0.136054	4.92186	2.74106
Q3-1995	1	1	1	0	1	1	1	1		18	16	10		8	18	8	9											3.40963	3.91021	0.498082	1.34369	1.77528	0.522411	4.4298	1.89864
Q4-1995	1	1	1	0	1	1	1	1		19	17	11		9	19	9	10											2.82963	1.12534	0.185103		3.29897	1.61852	0.955462	2.80773
Q1-1996	1	1	1	0	1	1	1	1		20	18	12		10	20	10	11											2.61544	3.59068	2.67292		1.72985	0.248538	3.73025	2.57319
Q2-1996	1	1	1	1	1	1	1	1		21	19	13	1	11	21	11	12											6.92373	1.2715	0.970201	5.6725	-2.08966	2.7747	4.51073	2.53692
Q3-1996	1	1	1	1	1	1	1	1		22	20	14	2	12	22	12	13											3.68305	2.7226	2.40281	2.42699	0.901969	3.49403	-0.113952	3.878
Q4-1996	1	1	1	1	1	1	1	1		23	21	15	3	13	23	13	14								13			4.20412	3.79057	0.400229	2.22367	-0.239916	3.1686	4.58112	1.59811
Q1-1997	1	1	1	1	1	1	0	1		24	22	16	4	14	24		15											3.03717	7.63725	1.50077	-2.41328	1.07552	5.24328	1.38336	4.52868
Q2-1997	1	1	1	1	1	1	0	1		25	23	17	5	15	25		16											5.98922	3.51999	4.61095	5.60901	5.39846	4.47915		3.63791
Q3-1997	1	1	1	1	1	1	0	1		26	24	18	6	16	26		17						16					5.06114	1.95765	2.88452	1.54161	2.40455	4.75071		4.02478
Q4-1997	1	1	1	1	0	1	0	1		27	25	19	7		27		18											3.09178	4.1273	4.26408	2.83408	6.5213	3.81548		5.73583
Q1-1998	1	1	1	1	0	1	0	1		28	26	20	8		28		19											3.93823	3.02732	3.54127	3.19345		5.56986		3.95498
Q2-1998	1	1	1	1	0	1	0	1		29	27	21	9		29		20											3.86074	3.61064	3.44303	-1.28808		0.173952		3.01275
Q3-1998	1	1	1	1	0	1	0	1		30	28	22	10		30		21											5.19885	2.97081	2.99417	1.05838		3.6934		4.76765
Q4-1998	1	1	1	1	0	1	0	1		31	29	23	11		31		22											6.51282	3.87302	2.94489	-0.0919418		5.3674		4.18074
Q1-1999	1	1	1	1	1	1	0	1		32	30	24	12	1	32		23											3.18132	2.25362	2.34096	3.19349	2.35718	7.18495		3.22747
Q2-1999	1	1	1	1	1	1	1	1		33	31	25	13	2	33	1	24											3.28533	0.247993	3.31092	0.865446	1.70776	3.34524	1.94316	5.98585
Q3-1999	1	1	1	1	1	1	1	1		34	32	26	14	3	34	2	25											5.00265	7.0759	4.60499	4.16438	3.32535	6.18288	1.90264	4.75008
Q4-1999	1	1	1	1	1	1	1	1		35	33	27	15	4	35	3	26											6.88373	5.46166	5.01845	4.96732	5.62878	5.64563	-0.0321068	4.67909
Q1-2000	1	1	1	1	1	1	1	1		36	34	28	16	5	36	4	27											1.15899	3.36157	4.17488	3.74069	4.62384	6.33359	7.71856	6.32807
Q2-2000	1	1	1	1	1	1	1	1		37	35	29	17	6	37	5	28											7.48464	2.43792	3.64642	4.03336	2.84104	4.73684	0.835163	4.87908
Q3-2000	1	1	1	1	1	1	1	1		38	36	30	18	7	38	6	29											0.480822	1.12111	2.67254	-0.567474	2.15343	4.02035	0.326536	4.31831
Q4-2000	1	1	1	1	1	1	1	1		39	37	31	19	8	39	7	30					19	8		7			2.26715	0.664944	3.37988	0.305693	6.1179	0.711373	3.72623	4.39006
Q1-2001	1	1	1	0	0	1	0	1		40	38	32			40		31											-1.13905	5.24736	2.00534	6.48342	1.45915	2.07622	2.35942	3.97275
Q2-2001	1	1	1	0	0	1	0	1		41	39	33			41		32											2.11472	3.13521	0.76663			1.03111		3.16678
Q3-2001	1	1	1	0	0	1	0	1		42	40	34			42		33											-1.26703	2.96919	1.28447			-0.302956		3.96102
Q4-2001	1	1	1	0	0	1	0	1		43	41	35			43		34											1.10859	1.77825	0.00771973			2.44474		2.82574
Q1-2002	1	1	1	0	0	1	1	1		44	42	36			44	1	35											3.66631	1.89528	1.18113			5.9152	0.472381	2.26998
Q2-2002	1	1	1	0	1	1	1	1		45	43	37		1	45	2	36											2.20084	2.62938	2.0899		1.96226	2.27358	3.09812	2.9958
Q3-2002	1	1	1	0	1	1	1	1		46	44	38		2	46	3	37						2					1.94258	3.02048	1.43018		0.85874	3.47964	1.58489	2.4122
Q4-2002	1	1	1	0	0	1	1	1		47	45	39			47	4	38											0.254547	3.57112	0.14833		1.54935	2.20951	1.05531	2.99323
Q1-2003	1	1	1	0	0	1	1	1		48	46	40			48	5	39											2.06663	2.62075	0.600387			2.19765	-0.441177	3.92775
Q2-2003	1	1	1	1	0	1	1	1		49	47	41	1		49	6	40											3.6946	3.76871	-0.865723	0.0868499		-0.593922	3.18639	2.70737
Q3-2003	1	1	1	1	1	1	1	1		50	48	42	2	1	50	7	41											6.64364	4.0697	2.57135	1.99196	0.458599	1.50498	1.61395	2.73581
Q4-2003	1	1	1	1	1	1	1	1		51	49	43	3	2	51	8	42											4.64975	3.21861	3.21577	1.466	3.18935	2.73343	4.41888	4.08625
Q1-2004	1	1	1	1	1	1	1	1		52	50	44	4	3	52	9	43					4						2.2937	2.18314	3.52581	-0.0968799	1.84414	2.8736	3.09674	2.42268
Q2-2004	1	1	1	0	1	1	1	1		53	51	45		4	53	10	44											2.92137	1.52964	2.52718	1.37515	1.29864	4.70205	-0.137835	3.09162
Q3-2004	1	1	1	0	1	1	1	1		54	52	46		5	54	11	45											3.61933	0.659008	1.55214		0.381474	4.72737	2.08435	4.00914
Q4-2004	1	1	1	0	1	1	1	1		55	53	47		6	55	12	46											3.44257	1.00715	2.72241		0.653562	2.86137	-1.06222	2.45386
Q1-2005	1	1	1	0	1	1	1	1		56	54	48		7	56	13	47											4.24125	3.77393	1.05829		-0.998014	1.36176	1.92048	4.02599
Q2-2005	1	1	1	1	1	1	1	1		57	55	49	1	8	57	14	48											2.08304	4.41194	0.788845	2.65836	3.86663	2.83759	3.1172	4.05644
Q3-2005	1	1	1	1	1	1	1	1		58	56	50	2	9	58	15	49											3.34628	4.6526	1.95404	3.23475	2.65959	4.89263	3.79296	3.77503
Q4-2005	1	1	1	1	1	1	1	1		59	57	51	3	10	59	16	50											2.2796	5.94832	2.80513	1.5232	1.12261	3.94212	0.846215	4.16114
Q1-2006	1	1	1	1	1	1	1	1		60	58	52	4	11	60	17	51											4.77692	1.06384	3.32863	3.70933	1.42512	3.19329	0.302103	4.30843
Q2-2006	1	1	1	1	1	1	1	1		61	59	53	5	12	61	18	52											1.19348	0.89031	3.90353	6.35096	2.34963	0.192986	1.3894	4.15568
Q3-2006	1	1	1	1	1	1	1	1		62	60	54	6	13	62	19	53											0.357592	0.256487	0.0810357	3.97483	1.41733	1.11006	-0.68922	3.92969
Q4-2006	1	1	1	1	1	1	1	1		63	61	55	7	14	63	20	54											3.11867	1.4082	2.96181	5.18541	5.17393	1.50604	4.85935	3.78075
Q1-2007	1	1	1	1	1	1	1	1		64	62	56	8	15	64	21	55											0.247039	3.96019	3.10124	1.6366	0.643149	2.57806	2.93066	4.07136
Q2-2007	1	1	1	1	1	1	1	1		65	63	57	9	16	65	22	56											3.04803	2.87603	3.17502	2.95528	-0.401467	3.84204	0.471019	3.23099
Q3-2007	1	1	1	1	1	1	1	1		66	64	58	10	17	66	23	57		66									2.68134	3.37346	1.24337	3.36783	-0.146529	1.65862	-1.80975	3.23098													1
Q4-2007	0	1	1	1	1	1	1	1			65	59	11	18	67	24	58			65	59	11	18		24			1.4251	3.31448	1.076	1.10325	-0.591875	0.55986	2.01728	3.42755														1
Q1-2008	0	0	0	0	0	1	0	1							68		59									59			1.42151	1.68165	3.49646	4.41566	0.237063	1.20827	1.82063
Q2-2008	0	0	0	0	0	1	0	0							69									69									1.38546		0.222743
Q3-2008	0	0	0	0	0	0	0	0																									3.32283
Q4-2008	0	0	0	0	0	0	0	0
Q1-2009	0	0	0	0	0	0	0	0
Q2-2009	0	0	0	1	0	0	1	0					1			1															0.293253			8.34963
Q3-2009	1	1	1	1	1	1	1	0		1	1	1	2	1	1	2												1.30521	0.568659	0.641829	2.37985	2.27396	1.80596	0.107672
Q4-2009	1	1	1	1	1	1	1	0		2	2	2	3	2	2	3												3.8536	1.38232	2.71812	3.64655	1.57107	4.69746	5.6628
Q1-2010	1	1	1	1	1	1	1	1		3	3	3	4	3	3	4	1											1.72765	1.7999	1.65772	2.92807	1.68	4.73724	3.53649	1.20566
Q2-2010	1	1	1	1	1	1	1	1		4	4	4	5	4	4	5	2								5	2		3.84559	3.4206	2.13586	8.10729	2.1906	2.05149	4.92978	0.727282
Q3-2010	1	1	1	1	1	1	0	0		5	5	5	6	5	5													2.69064	2.30624	2.44787	3.23725	2.10667	2.84629	7.20649	0.193818
Q4-2010	1	1	1	1	1	1	0	0		6	6	6	7	6	6													2.51255	0.52072	2.71111	3.32972	2.5601	4.49656
Q1-2011	1	1	1	1	1	1	0	0		7	7	7	8	7	7								7					-1.54795	2.98717	4.16175	7.00398	1.23541	2.94654
Q2-2011	1	1	1	1	0	1	0	0		8	8	8	9		8													2.89929	0.590251	0.255307	0.697616	0.256011	0.759086
Q3-2011	1	1	1	1	0	1	1	0		9	9	9	10		9	1												0.842183	1.07521	0.844541	1.89292		5.51342	9.61321
Q4-2011	1	1	1	1	0	1	1	0		10	10	10	11		10	2									2			4.478	0.663349	1.02199	0.0770437		3.14813	-0.588686
Q1-2012	1	1	1	1	0	1	0	0		11	11	11	12		11													2.64504	2.58259	0.260756	1.2599		0.127557	4.72562
Q2-2012	1	1	1	1	0	1	0	0		12	12	12	13		12						12	13						1.8629	-0.215399	-0.297048	0.383904		1.3182
Q3-2012	1	1	0	0	0	1	0	0		13	13				13													0.478452	4.73517	0.584063	0.919878		0.788074
Q4-2012	1	1	0	0	0	1	1	0		14	14				14	1												0.08976	-0.916348				0.487545	0.870218
Q1-2013	1	1	0	0	0	1	1	0		15	15				15	2												2.78856	2.57828				4.10091	4.7692
Q2-2013	1	1	1	1	0	1	1	0		16	16	1	1		16	3												0.765642	2.18743	2.71728	3.53035		2.58476	3.3832
Q3-2013	1	1	1	1	0	1	1	0		17	17	2	2		17	4												3.07488	3.56991	-0.0300239	2.01972		3.2642	3.04632
Q4-2013	1	1	1	1	0	1	1	1		18	18	3	3		18	5	1								5			3.88334	1.86718	1.66368	1.63121		4.01152	-0.126039	1.13899
Q1-2014	1	1	1	1	0	1	0	1		19	19	4	4		19		2											-0.921869	3.33877	0.301136	3.50529		0.497467	3.87443	1.57856
Q2-2014	1	1	1	1	0	1	0	1		20	20	5	5		20		3											4.49955	3.31537	0.991468	-0.676076		4.76646		1.54286
Q3-2014	1	1	1	1	1	1	0	1		21	21	6	6	1	21		4							21				5.08029	2.79355	1.78278	1.27605	0.959249	2.90266		2.71199
Q4-2014	1	1	1	1	1	0	1	1		22	22	7	7	2		1	5											1.9953	2.65359	0.438157	3.54397	0.00952574	1.81284	2.48829	2.98919
Q1-2015	1	1	1	1	1	0	1	1		23	23	8	8	3		2	6											3.18694	1.77073	1.67997	0.445471	0.909415		5.95136	4.18646
Q2-2015	1	1	1	1	1	0	1	1		24	24	9	9	4		3	7											2.70446	2.26981	-0.0878169	1.77676	1.65887		-0.285679	3.37948
Q3-2015	1	1	1	1	1	1	1	1		25	25	10	10	5	1	4	8											1.61747	1.72738	1.516	1.29064	0.888613	2.25559	0.345841	3.73964
Q4-2015	1	1	1	1	1	1	1	1		26	26	11	11	6	2	5	9											0.484528	2.96165	1.00015	1.68994	1.14314	0.41548	-1.2398	3.65341
Q1-2016	1	1	1	1	1	1	1	1		27	27	12	12	7	3	6	10											0.578623	1.29504	2.61555	2.5216	0.92221	2.45775	3.37855	2.98582
Q2-2016	1	1	1	1	1	1	1	1		28	28	13	13	8	4	7	11											2.21316	0.625153	-0.916203	1.85359	0.386449	-1.04968	0.872994	3.13649
Q3-2016	1	1	1	1	1	1	1	1		29	29	14	14	9	5	8	12											2.74226	1.88261	0.793045	1.33944	0.918897	4.18319	0.753602	2.84406
Q4-2016	1	1	1	1	1	1	1	1		30	30	15	15	10	6	9	13											1.74304	2.95487	2.42408	1.659	1.92874	2.21401	0.993389	2.72091
Q1-2017	1	1	1	1	1	1	1	1		31	31	16	16	11	7	10	14											1.22816	1.56561	3.07645	3.583	2.0222	3.92997	2.68777	3.13319
Q2-2017	1	1	1	1	1	1	1	1		32	32	17	17	12	8	11	15											3.01394	0.849789	2.6254	2.52454	1.57265	4.45755	2.10519	3.44417
Q3-2017	1	1	1	1	1	1	1	1		33	33	18	18	13	9	12	16											3.10713	1.40301	2.71895	2.93118	1.36884	1.63707	1.97812	2.7733
Q4-2017	1	1	1	1	1	1	1	1		34	34	19	19	14	10	13	17		34	34	19	19	14	10	13	17		2.84706	1.41957	2.69778	2.42055	1.40495	1.69474	1.01948	2.69726													1	1
[truncated: 14 more columns]

## Sheet: Table2
	Table 2. Properties of the Classical Cycles
	CLASSICAL CYCLES: CONTRACTIONS
		1960:Q1-1983:Q4			1984:Q1-2017:Q4			1984:Q1-2017:Q4 over 1960:Q1-1983:Q4
		Frequency (%)	Duration	Growth (%)	Frequency (%)	Duration	Growth (%)	Frequency (%)	Duration	Growth (%)
	US	19.7917	3	-2.54318	7.35294	5	-2.33072	0.371517	1.66667	0.916458
	UK	21.875	8	-1.89991	8.82353	6	-2.15696	0.403361	0.75	1.13529
	FR	7.29167	3.5	-1.80368	9.55882	4	-1.13289	1.31092	1.14286	0.628103
	DE	20.8333	4	-2.01287	24.2647	4.5	-1.09363	1.16471	1.125	0.54332
	IT	16.6667	4	-1.42111	28.6765	5.5	-1.26283	1.72059	1.375	0.888624
	CA	14.5833	4	-2.71565	8.82353	4	-3.60175	0.605042	1	1.32629
	JP	0	0	--	22.7941	4	-2.60618	--	--	--
	ES	10.4167	3	-0.592405	19.1176	7	-2.37954	1.83529	2.33333	4.01674
	G8 Median	15.625	3.75	-1.89991	14.3382	4.75	-2.24384	0.917647	1.26667	1.18102
	CLASSICAL CYCLES: EXPANSIONS
		1960:Q1-1983:Q4			1984:Q1-2017:Q4			1984:Q1-2017:Q4 over 1960:Q1-1983:Q4
		Frequency (%)	Duration	Growth (%)	Frequency (%)	Duration	Growth (%)	Frequency (%)	Duration	Growth (%)
	US	80.2083	14	3.89263	92.6471	34	3.00173	1.15508	2.42857	0.77113
	UK	78.125	12.5	2.76213	91.1765	34	2.62506	1.16706	2.72	0.950378
	FR	92.7083	19	3.84944	90.4412	26	2.1448	0.975545	1.36842	0.557171
	DE	79.1667	11.5	4.25842	75.7353	13	2.75895	0.956656	1.13043	0.647881
	IT	83.3333	16	5.65697	71.3235	14	1.72985	0.855882	0.875	0.30579
	CA	85.4167	11.5	4.512	91.1765	22.5	2.83759	1.06743	1.95652	0.6289
	JP	100	96	5.73095	77.2059	10	2.50022	0.772059	0.104167	0.436267
	ES	89.5833	10.5	3.90835	80.8824	24.5	3.29519	0.902873	2.33333	0.843118
	G8 Median	84.375	13.25	4.08338	85.6618	23.5	2.692	1.01525	1.77358	0.659259
	Note: Classical cycles are dated using the Bry and Boschan (1971) algorithm on real GDP data in levels for the U.S., U.K., CA, FR, DE, JP, ES, and IT.
	Each subsample is treated as a separate period and both complete and incomple cycles are included. Duration and Growth (log-first differenced, annualized, %) refer to the
	corresponding median of each cycle phase within each subsample.
	Sources: Organization for Economic Cooperation and Development; author’s calculation.
