# Supplementary material for: Modeling time-variation over the business cycle (1960–2017): an international perspective
Source: publisher site journal article supplement (doi:10.1515/snde-2017-0101), 2018-11-22
Supplement: Supplementary file 25 [file Figure5.xlsx]

## Sheet: README
Modeling Time-Variation Over the Business Cycle (1960-2017): An International Perspective
Enrique Martinez-Garcia
Federal Reserve Bank of Dallas and SMU
emg.economics@gmail.com
Date: 10/1/2018

## Sheet: Real GDP
Q1/1960 !Q mag=bil	.excel_last	B111GDPC@OECDNAQ	B112GDPC@OECDNAQ	B132GDPC@OECDNAQ	B134GDPC@OECDNAQ	B136GDPC@OECDNAQ	B156GDPC@OECDNAQ	B158GDPC@OECDNAQ	B184GDPC@OECDNAQ
.DESC		United States: Gross Domestic Product (SAAR, Bil.2010.US$, PPP)	United Kingdom: Gross Domestic Product (SAAR, Bil.2010.US$, PPP)	France: Gross Domestic Product (SAAR, Bil.2010.US$, PPP)	Germany: Gross Domestic Product (SAAR, Bil.2010.US$, PPP)	Italy: Gross Domestic Product (SAAR, Bil.2010.US$, PPP)	Canada: Gross Domestic Product (SAAR, Bil.2010.US$, PPP)	Japan: Gross Domestic Product (SAAR, Bil.2010US$, PPP)	Spain: Gross Domestic Product (SAAR, Bil.2010.US$, PPP)
.T1		Q1-1947	Q1-1955	Q1-1960	Q1-1960	Q1-1960	Q1-1960	Q1-1960	Q1-1960
.TN		Q1-2018	Q1-2018	Q1-2018	Q1-2018	Q1-2018	Q1-2018	Q1-2018	Q1-2018
.LSOURCE		Organization for Economic Cooperation & Development	Organization for Economic Cooperation & Development	Organization for Economic Cooperation & Development	Organization for Economic Cooperation & Development	Organization for Economic Cooperation & Development	Organization for Economic Cooperation & Development	Organization for Economic Cooperation & Development	Organization for Economic Cooperation & Development
.DTLM		Jun-29-2018 05:33	Jul-02-2018 06:06	Jun-26-2018 05:33	May-16-2018 06:21	Jun-04-2018 06:05	Jun-01-2018 05:26	Jun-08-2018 05:25	Jun-01-2018 05:26
Q1/1960	1960-03-31	3161.31	674.925	544.545	901.678	527.496	271.921	559.92	227.419
Q2/1960	1960-06-30	3149.31	670.087	546.59	917.725	535.238	266.692	560.95	232.094
Q3/1960	1960-09-30	3157.15	680.251	550.682	949.448	543.098	270.762	580.22	238.587
Q4/1960	1960-12-31	3118.94	684.405	557.209	959.152	543.515	271.658	602.52	243.39
Q1/1961	1961-03-31	3140.14	695.555	566.171	968.856	562.988	270.559	620.83	250.346
Q2/1961	1961-06-30	3198.51	698.355	575.231	963.63	574.898	277.363	634.07	261.465
Q3/1961	1961-09-30	3251.85	694.704	584.39	983.409	588.297	284.062	646.23	266.805
Q4/1961	1961-12-31	3317.75	693.595	594.319	987.889	599.552	288.039	675.88	274.333
Q1/1962	1962-03-31	3377.51	696.867	605.019	1002.44	608.425	295.666	684.96	280.823
Q2/1962	1962-06-30	3413.9	703.344	614.794	1012.89	614.976	297.815	694.53	287.356
Q3/1962	1962-09-30	3446.42	707.617	623.646	1037.15	618.668	301.723	703.02	294.393
Q4/1962	1962-12-31	3459.8	705.066	631.452	1034.91	627.957	307.856	717.71	295.183
Q1/1963	1963-03-31	3498.29	708.701	620.934	998.711	632.126	309.703	727.52	312.164
Q2/1963	1963-06-30	3543.9	739.096	648.661	1043.5	649.455	314.244	748.93	312.423
Q3/1963	1963-09-30	3613.08	742.856	670.059	1079.7	660.115	316.659	770.89	319.164
Q4/1963	1963-12-31	3638.86	759.352	672.145	1084.92	666.903	326.605	797.45	325.106
Q1/1964	1964-03-31	3717.57	763.921	684.799	1099.85	676.789	334.7	822.89	326.945
Q2/1964	1964-06-30	3761.78	777.109	691.366	1113.29	669.941	335.852	842.74	332.333
Q3/1964	1964-09-30	3812.87	780.174	699.844	1124.86	668.809	339.384	855.76	334.829
Q4/1964	1964-12-31	3826.39	792.045	706.168	1140.16	666.01	341.174	866.46	342.109
Q1/1965	1965-03-31	3920.76	789.835	707.736	1158.82	675.002	351.892	873.5	349.39
Q2/1965	1965-06-30	3974.36	790.676	725.345	1177.11	688.461	355.193	884.41	350.88
Q3/1965	1965-09-30	4055.08	797.246	735.826	1184.94	697.631	359.991	904.45	354.452
Q4/1965	1965-12-31	4150.72	802.183	746.071	1192.03	708.112	368.844	918.51	365.048
Q1/1966	1966-03-31	4253.21	803.506	752.802	1213.68	714.96	375.897	943.09	362.564
Q2/1966	1966-06-30	4270.63	808.173	764.188	1217.41	725.144	383.813	979.99	381.3
Q3/1966	1966-09-30	4301.05	810.839	772.903	1218.91	745.629	383.666	1003.82	388.864
Q4/1966	1966-12-31	4337.93	807.447	777.123	1199.87	749.202	388.295	1023.88	389.917
Q1/1967	1967-03-31	4377.75	818.441	790.44	1193.9	764.149	387.394	1051.01	390.991
Q2/1967	1967-06-30	4381.59	829.928	799.092	1190.17	780.585	395.522	1079.29	395.689
Q3/1967	1967-09-30	4419.42	833.579	806.733	1218.91	792.614	396.84	1116.71	402.476
Q4/1967	1967-12-31	4454.99	838.018	814.596	1234.58	808.276	398.341	1138.3	399.581
Q1/1968	1968-03-31	4545.46	868.486	838.298	1249.03	810.241	401.574	1165.46	408.108
Q2/1968	1968-06-30	4622.22	864.726	774.747	1258.74	827.213	412.479	1205.22	420.49
Q3/1968	1968-09-30	4655.51	881.933	862.861	1286.37	847.102	418.049	1232.51	423.881
Q4/1968	1968-12-31	4676.23	885.464	871.701	1305.79	866.933	423.811	1302.73	441.062
Q1/1969	1969-03-31	4748.94	883.494	873.303	1338.65	880.51	429.303	1314.19	456.711
Q2/1969	1969-06-30	4764.17	889.95	894.726	1355.82	896.41	431.365	1352.45	455.168
Q3/1969	1969-09-30	4793.99	894.97	903.184	1384.95	898.554	435.916	1384.85	463.659
Q4/1969	1969-12-31	4773.07	899.549	910.322	1406.23	880.391	442.055	1438.9	468.85
Q1/1970	1970-03-31	4764.61	893.803	927.721	1383.79	933.183	444.846	1482.99	477.616
Q2/1970	1970-06-30	4773.04	914.879	939.429	1438.81	939.996	444.663	1500.98	478.375
Q3/1970	1970-09-30	4815.32	923.949	952.368	1465.68	958.855	449.199	1541.21	480.819
Q4/1970	1970-12-31	4765.79	932.024	967.322	1478.11	959.927	449.957	1536.25	484.613
Q1/1971	1971-03-31	4893.4	926.522	968.57	1449.71	954.906	447.261	1550.25	488.398
Q2/1971	1971-06-30	4921.32	943.07	986.217	1480.14	958.936	460.339	1575.25	497.924
Q3/1971	1971-09-30	4959.8	959.478	1002.3	1505.74	972.982	473.026	1594.45	507.086
Q4/1971	1971-12-31	4974.28	963.274	1010.89	1504.48	978.475	478.398	1608.97	517.296
Q1/1972	1972-03-31	5063.54	964.286	1024.13	1506	989.285	476.534	1661.39	525.689
Q2/1972	1972-06-30	5180.79	990.096	1028.06	1530.59	988.837	490.084	1692.66	538.11
Q3/1972	1972-09-30	5228.54	992.788	1037.19	1566.34	1002.17	491.2	1728.79	549.932
Q4/1972	1972-12-31	5315.37	1008.32	1054.41	1590.68	1006.93	502.95	1772.28	560.826
Q1/1973	1973-03-31	5446.22	1058.29	1075.42	1612.67	1016.01	516.211	1831.56	571.149
Q2/1973	1973-06-30	5507.97	1059.8	1087.04	1624.59	1046.46	521.845	1848.31	581.332
Q3/1973	1973-09-30	5478.04	1049.66	1096.37	1629.91	1079.75	523.613	1853.7	590.933
Q4/1973	1973-12-31	5529.12	1045.2	1110.39	1633.97	1106.13	533.476	1876.61	600.657
Q1/1974	1974-03-31	5483.19	1016.71	1121.04	1647.79	1115.1	537.361	1812.13	610.858
Q2/1974	1974-06-30	5497.6	1031.38	1126.65	1646.52	1125.75	543.307	1825.18	618.576
Q3/1974	1974-09-30	5444.38	1038.07	1137.28	1646.52	1127.62	542.668	1848.53	622.942
Q4/1974	1974-12-31	5422.6	1023	1120.1	1625.73	1104.05	540.134	1838.51	623.354
Q1/1975	1975-03-31	5357.09	1023.5	1115.07	1616.35	1084.84	536.479	1840.92	620.225
Q2/1975	1975-06-30	5398.36	1006.76	1117.88	1608.23	1084.29	543.495	1881.79	619.71
Q3/1975	1975-09-30	5487.57	1003.37	1122.21	1625.73	1099.7	553.643	1903.2	622.417
Q4/1975	1975-12-31	5561.56	1014.7	1137.37	1657.67	1112.02	560.03	1923.22	626.792
Q1/1976	1976-03-31	5687.15	1031	1154.06	1672.57	1131.61	569.764	1939.51	633.021
Q2/1976	1976-06-30	5730.12	1029.17	1167.82	1697.42	1152.06	582.079	1950.97	640.328
Q3/1976	1976-09-30	5759.25	1041.98	1173.34	1697.92	1181.34	584.614	1978.4	646.538
Q4/1976	1976-12-31	5802.48	1063.96	1187.96	1729.36	1201.83	585.849	1980.75	651.503
Q1/1977	1977-03-31	5869.99	1064.49	1201.09	1744.13	1202.31	593.944	2024.08	656.664
Q2/1977	1977-06-30	5985.2	1056.77	1206.32	1754.02	1195.62	597.319	2038.32	659.643
Q3/1977	1977-09-30	6091.09	1064.09	1211.85	1753.51	1184.43	600.194	2052.22	661.835
Q4/1977	1977-12-31	6091.73	1082.54	1214.61	1783.68	1194.58	609.754	2080.06	666.256
Q1/1978	1978-03-31	6112.92	1091.88	1231.48	1791.03	1214.1	614.97	2119.35	670.416
Q2/1978	1978-06-30	6350.6	1105.08	1251.96	1798.13	1235.1	620.613	2139.95	671.774
Q3/1978	1978-09-30	6412.7	1120.03	1250.86	1821.71	1241.6	625.085	2167.63	670.95
Q4/1978	1978-12-31	6498.71	1130.24	1261.5	1843.01	1260.52	630.398	2198.91	669.957
Q1/1979	1979-03-31	6511.62	1125.81	1272.35	1845.29	1280.44	635.821	2231.79	668.889
Q2/1979	1979-06-30	6519.5	1175.72	1284.52	1902.59	1289.75	644.448	2272.57	669.929
Q3/1979	1979-09-30	6566.32	1150.02	1299.2	1902.59	1312.07	648.618	2289.9	671.54
Q4/1979	1979-12-31	6583.31	1162.09	1301.67	1914.25	1342.95	652.98	2299.86	673.9
Q1/1980	1980-03-31	6604.61	1150.79	1316.23	1929.59	1340.49	657.595	2308.66	678.413
Q2/1980	1980-06-30	6470.66	1128.01	1308.7	1917.17	1350.89	657.379	2296.49	680.719
Q3/1980	1980-09-30	6460.85	1126.61	1308.69	1909.56	1352.02	656.488	2347.93	678.02
Q4/1980	1980-12-31	6580.59	1114.65	1307.9	1907.03	1363.54	665.648	2397.83	681.952
Q1/1981	1981-03-31	6716.78	1112.88	1312.4	1929.72	1355.76	680.443	2412.53	678.091
Q2/1981	1981-06-30	6667.73	1115.59	1318.86	1924.9	1358.41	687.951	2442.05	677.34
Q3/1981	1981-09-30	6744.24	1127.72	1329.44	1929.97	1359.04	681.786	2436.62	680.352
Q4/1981	1981-12-31	6665.56	1129.02	1336.66	1928.45	1370.07	678.68	2454.41	679.673
Q1/1982	1982-03-31	6554.06	1130.78	1347.28	1935.67	1369.53	670.607	2492.02	682.471
Q2/1982	1982-06-30	6589.77	1143.49	1356.64	1923.76	1365.63	662.876	2509.13	685.063
Q3/1982	1982-09-30	6566.03	1146.51	1357.38	1904.74	1364.9	657.032	2520.1	689.675
Q4/1982	1982-12-31	6572.44	1154.59	1365.5	1909.31	1360.94	650.968	2555.12	692.106
Q1/1983	1983-03-31	6658.52	1175.5	1371	1926.61	1364.74	661.674	2556.73	694.635
Q2/1983	1983-06-30	6810.47	1185.52	1371.16	1946.89	1363.1	674.824	2575.95	698.925
Q3/1983	1983-09-30	6943.81	1198.58	1373.26	1942.84	1388.48	682.47	2614.5	699.953
Q4/1983	1983-12-31	7087.01	1208.94	1379.71	1969.71	1419.26	691.153	2636.28	704.476
Q1/1984	1984-03-31	7227.81	1217.28	1388.95	1995.76	1416.48	703.006	2666.64	710.303
Q2/1984	1984-06-30	7354.76	1206.66	1393.01	1964.32	1421.04	716.757	2707.02	708.113
Q3/1984	1984-09-30	7427.11	1214.51	1400.87	2017.82	1437.77	719.799	2740.1	714.28
Q4/1984	1984-12-31	7486.36	1238.64	1404.28	2034.81	1438	731.144	2744.83	715.192
Q1/1985	1985-03-31	7560.78	1249.09	1406.83	2023.71	1446.23	742.25	2812.1	723.173
Q2/1985	1985-06-30	7630	1275.7	1416.31	2044	1465.33	744.634	2869.04	722.494
Q3/1985	1985-09-30	7748.7	1276.91	1425.45	2070.62	1477.07	754.061	2906.59	729.984
Q4/1985	1985-12-31	7806.83	1280.01	1431.13	2083.04	1486.91	765.663	2945.2	738.368
Q1/1986	1986-03-31	7879.19	1294.59	1436.41	2071.13	1496.18	765.494	2956.91	740.45
Q2/1986	1986-06-30	7915.36	1304.07	1451.91	2094.96	1505.86	769.901	2949.64	758.084
Q3/1986	1986-09-30	7995.03	1309.76	1457.85	2110.42	1520.89	770.883	2966.92	752.74
Q4/1986	1986-12-31	8036.43	1332.88	1461.36	2131.47	1527.13	765.329	2990.32	757.548
Q1/1987	1987-03-31	8092.62	1344.77	1465.32	2077.97	1533.39	783.054	2988.18	773.064
Q2/1987	1987-06-30	8183.46	1364.19	1482.09	2124.62	1556.61	793.207	3050.8	784.63
Q3/1987	1987-09-30	8257.68	1397.18	1493.4	2139.33	1561.1	805.358	3111.82	800.834
Q4/1987	1987-12-31	8393.98	1412.99	1516.22	2173.55	1577.9	815.815	3191.95	817.217
Q1/1988	1988-03-31	8441.18	1438.55	1535.88	2153.84	1601.12	827.748	3268.14	819.844
Q2/1988	1988-06-30	8552.72	1447.15	1546.11	2192.89	1611.29	835.103	3263.37	829.873
Q3/1988	1988-09-30	8602.08	1469.29	1566.55	2217.73	1632.47	835.171	3336.18	844.834
Q4/1988	1988-12-31	8716.02	1481.95	1581.96	2243.85	1651.96	841.04	3371.33	842.94
Q1/1989	1989-03-31	8803.95	1488.4	1603.35	2267.3	1662.22	850.632	3462.29	862.817
Q2/1989	1989-06-30	8873.18	1498.11	1616.23	2276.43	1669.41	853.9	3417.09	871.308
Q3/1989	1989-09-30	8939.42	1499.51	1635.28	2297.21	1686.81	856.982	3476.87	882.981
Q4/1989	1989-12-31	8958.33	1500.86	1654.72	2323.83	1704.17	855.145	3584.6	881.515
Q1/1990	1990-03-31	9056.41	1511.09	1666.15	2372.07	1710.96	863.172	3567.54	889.237
Q2/1990	1990-06-30	9091.43	1518.87	1674.05	2383.73	1716.18	859.583	3680.06	904.351
Q3/1990	1990-09-30	9093.68	1503.11	1680.13	2433.93	1718.93	853.413	3741.77	901.652
Q4/1990	1990-12-31	9016.16	1498.07	1684.98	2476.78	1707.76	845.763	3734.66	935.749
Q1/1991	1991-03-31	8973.85	1493.86	1682.25	2548.49	1741.47	833.527	3767.2	917.767
Q2/1991	1991-06-30	9043.49	1492.04	1691.82	2537.91	1731.93	837.339	3811.89	928.957
Q3/1991	1991-09-30	9086.9	1488.63	1695.01	2525.08	1732.56	838.408	3803.45	935.973
Q4/1991	1991-12-31	9126.57	1491	1704.16	2557.8	1752.89	839.919	3830.17	940.629
Q1/1992	1992-03-31	9234.38	1490.88	1719.43	2598.77	1757.6	840.471	3831.36	950.014
Q2/1992	1992-06-30	9336.2	1489.06	1719.59	2581.77	1756.6	841.483	3844.77	937.626
Q3/1992	1992-09-30	9426.96	1498.6	1719.17	2574.08	1752.7	846.012	3849.3	938.225
Q4/1992	1992-12-31	9521.42	1509.12	1715.44	2568.62	1740.62	850.799	3824.76	932.112
Q1/1993	1993-03-31	9539.17	1520.17	1703.63	2546.01	1738.19	856.214	3867.86	923.415
Q2/1993	1993-06-30	9595.9	1527.89	1706.03	2547.29	1733.99	864.004	3843.37	923.353
Q3/1993	1993-09-30	9642.69	1540.19	1708.65	2565.25	1731.26	872.255	3815.78	934.462
Q4/1993	1993-12-31	9771.42	1550.67	1712.52	2563.65	1743.95	876.006	3839.82	937.984
Q1/1994	1994-03-31	9867.22	1569.54	1723.77	2595.01	1757.24	888.896	3871.57	945.742
Q2/1994	1994-06-30	10002.1	1587.76	1743.44	2603.99	1769.95	901.923	3851.38	947.815
Q3/1994	1994-09-30	10061.1	1605.79	1753.37	2623.55	1780.99	913.445	3900.31	955.341
Q4/1994	1994-12-31	10175.3	1614.94	1769.97	2658.2	1797.71	920.072	3882.46	958.916
Q1/1995	1995-03-31	10210.1	1620.13	1778.44	2646.09	1820.28	928.56	3921.44	969.164
Q2/1995	1995-06-30	10245.8	1625.98	1787.09	2669.18	1821.56	928.876	3969.99	975.829
Q3/1995	1995-09-30	10333.5	1641.95	1789.32	2678.16	1829.66	930.089	4014.2	980.471
Q4/1995	1995-12-31	10406.8	1646.57	1790.14	2676.88	1844.81	933.86	4023.8	987.378
Q1/1996	1996-03-31	10475.1	1661.42	1802.15	2650.1	1852.81	934.441	4061.5	993.75
Q2/1996	1996-06-30	10658	1666.71	1806.52	2687.95	1843.15	940.945	4107.56	1000.07
Q3/1996	1996-09-30	10756.6	1678.1	1817.41	2704.31	1847.31	949.201	4106.39	1009.82
Q4/1996	1996-12-31	10870.2	1694.07	1819.23	2719.38	1846.21	956.75	4153.69	1013.86
Q1/1997	1997-03-31	10953.1	1726.73	1826.07	2703.02	1851.18	969.373	4168.08	1025.4
Q2/1997	1997-06-30	11118.3	1741.99	1847.24	2741.2	1876.33	980.289	4137.03	1034.77
Q3/1997	1997-09-30	11259.9	1750.54	1860.61	2751.78	1887.64	992.001	4150.43	1045.23
Q4/1997	1997-12-31	11347.3	1768.69	1880.55	2771.35	1918.67	1001.51	4152.7	1060.33
Q1/1998	1998-03-31	11459.5	1782.13	1897.27	2793.56	1906.2	1015.55	4102.5	1070.87
Q2/1998	1998-06-30	11570.7	1798.29	1913.67	2784.58	1913.57	1015.99	4087.2	1078.96
Q3/1998	1998-09-30	11722	1811.7	1928.05	2791.96	1916.12	1025.42	4093.58	1091.9
Q4/1998	1998-12-31	11914.5	1829.32	1942.3	2791.31	1907.22	1039.27	4128.92	1103.37
Q1/1999	1999-03-31	12009.6	1839.66	1953.7	2813.69	1918.49	1058.11	4072.1	1112.31
Q2/1999	1999-06-30	12108.6	1840.8	1969.94	2819.78	1926.7	1066.99	4091.93	1129.08
Q3/1999	1999-09-30	12261	1873.65	1992.75	2849.29	1942.79	1083.61	4111.44	1142.57
Q4/1999	1999-12-31	12473.9	1899.41	2017.9	2884.9	1970.32	1099.02	4111.11	1156.01
Q1/2000	2000-03-31	12510.1	1915.44	2039.08	2912	1993.23	1116.56	4191.21	1174.45
Q2/2000	2000-06-30	12746.3	1927.15	2057.75	2941.51	2007.44	1129.86	4199.97	1188.86
Q3/2000	2000-09-30	12761.7	1932.56	2071.54	2937.34	2018.27	1141.27	4203.4	1201.77
Q4/2000	2000-12-31	12834.2	1935.77	2089.12	2939.59	2049.38	1143.3	4242.74	1215.03
Q1/2001	2001-03-31	12797.7	1961.34	2099.62	2987.62	2056.87	1149.25	4267.84	1227.15
Q2/2001	2001-06-30	12865.6	1976.77	2103.65	2990.19	2051.26	1152.22	4247.34	1236.91
Q3/2001	2001-09-30	12824.9	1991.5	2110.42	2981.53	2042.57	1151.35	4200.25	1249.22
Q4/2001	2001-12-31	12860.5	2000.37	2110.46	2985.06	2043.57	1158.41	4189.06	1258.07
Q1/2002	2002-03-31	12978.9	2009.87	2116.7	2975.84	2041.9	1175.66	4194.01	1265.23
Q2/2002	2002-06-30	13050.5	2023.13	2127.79	2983.53	2051.94	1182.36	4226.62	1274.75
Q3/2002	2002-09-30	13114	2038.46	2135.41	2997.65	2056.35	1192.7	4243.4	1282.46
Q4/2002	2002-12-31	13122.4	2056.74	2136.2	2991.23	2064.33	1199.3	4254.61	1292.09
Q1/2003	2003-03-31	13190.3	2070.26	2139.41	2954.99	2058.16	1205.91	4249.92	1304.84
Q2/2003	2003-06-30	13312.7	2089.86	2134.78	2955.63	2051.67	1204.12	4283.91	1313.7
Q3/2003	2003-09-30	13535.7	2111.23	2148.55	2970.38	2054.03	1208.66	4301.23	1322.72
Q4/2003	2003-12-31	13694	2128.29	2165.89	2981.29	2070.47	1216.95	4349.01	1336.3
Q1/2004	2004-03-31	13772.7	2139.93	2185.07	2980.57	2080.04	1225.72	4382.81	1344.42
Q2/2004	2004-06-30	13873.7	2148.13	2198.92	2990.83	2086.8	1240.21	4381.3	1354.85
Q3/2004	2004-09-30	13999.8	2151.68	2207.47	2985.38	2088.79	1254.96	4404.19	1368.5
Q4/2004	2004-12-31	14120.8	2157.1	2222.54	2988.27	2092.21	1263.97	4392.51	1376.92
Q1/2005	2005-03-31	14271.3	2177.55	2228.43	2982.49	2087	1268.28	4413.65	1390.84
Q2/2005	2005-06-30	14345.8	2201.7	2232.83	3002.38	2107.27	1277.31	4448.18	1405.02
Q3/2005	2005-09-30	14466.3	2227.46	2243.76	3026.76	2121.33	1293.03	4490.56	1418.34
Q4/2005	2005-12-31	14549	2260.83	2259.55	3038.31	2127.29	1305.83	4500.07	1433.18
Q1/2006	2006-03-31	14723.8	2266.85	2278.43	3066.61	2134.88	1316.3	4503.47	1448.7
Q2/2006	2006-06-30	14767.8	2271.9	2300.78	3115.69	2147.46	1316.93	4519.14	1463.83
Q3/2006	2006-09-30	14781	2273.36	2301.24	3146.81	2155.08	1320.59	4511.36	1478.28
Q4/2006	2006-12-31	14896.7	2281.38	2318.35	3187.86	2183.14	1325.58	4566.5	1492.32
Q1/2007	2007-03-31	14905.9	2304.08	2336.39	3200.93	2186.65	1334.15	4600.08	1507.58
Q2/2007	2007-06-30	15019.9	2320.7	2355.01	3224.67	2184.46	1347.02	4605.5	1519.81
Q3/2007	2007-09-30	15120.9	2340.36	2362.34	3251.94	2183.66	1352.62	4584.71	1532.14
Q4/2007	2007-12-31	15174.9	2359.83	2368.71	3260.92	2180.43	1354.51	4607.89	1545.32
Q1/2008	2008-03-31	15071.3	2368.23	2378.68	3289.55	2204.63	1355.32	4621.83	1552.37
Q2/2008	2008-06-30	15146.1	2350.7	2367.97	3280.57	2182.95	1360.02	4598.47	1553.24
Q3/2008	2008-09-30	15073.5	2311.99	2359.72	3268.7	2152.42	1371.36	4539.65	1541.5
Q4/2008	2008-12-31	14755	2261.78	2327.08	3205.5	2103.61	1355.5	4436.68	1525.97
Q1/2009	2009-03-31	14550.6	2224.18	2288.74	3061.72	2045.71	1324.53	4219.79	1501.57
Q2/2009	2009-06-30	14530.9	2219.96	2285.62	3063.97	2029.46	1309.92	4308.8	1487.03
Q3/2009	2009-09-30	14578.4	2223.12	2289.29	3082.25	2041.03	1315.85	4309.96	1482.4
Q4/2009	2009-12-31	14719.5	2230.82	2304.9	3110.48	2049.06	1331.39	4371.41	1481.47
Q1/2010	2010-03-31	14783.2	2240.88	2314.47	3133.33	2057.68	1347.25	4410.23	1485.94
Q2/2010	2010-06-30	14926	2260.12	2326.86	3197.49	2068.98	1354.18	4464.92	1488.65
Q3/2010	2010-09-30	15026.8	2273.19	2341.15	3223.47	2079.91	1363.85	4546.09	1489.37
Q4/2010	2010-12-31	15121.5	2276.15	2357.07	3250.41	2093.26	1379.27	4512.47	1489.35
Q1/2011	2011-03-31	15063.1	2293.22	2381.72	3307.83	2099.74	1389.46	4444.58	1483.98
Q2/2011	2011-06-30	15172.6	2296.6	2383.24	3313.6	2101.08	1392.1	4421.12	1476.87
Q3/2011	2011-09-30	15204.6	2302.78	2388.28	3329.32	2088.8	1411.42	4528.66	1470.86
Q4/2011	2011-12-31	15375.8	2306.61	2394.39	3329.96	2069.98	1422.58	4522	1462.14
Q1/2012	2012-03-31	15477.8	2321.55	2395.95	3340.47	2051.81	1423.03	4575.74	1449.45
Q2/2012	2012-06-30	15550.1	2320.3	2394.17	3343.68	2033	1427.73	4545.28	1435.66
Q3/2012	2012-09-30	15568.7	2347.93	2397.67	3351.37	2023.84	1430.54	4527.27	1425.05
Q4/2012	2012-12-31	15572.2	2342.56	2396.34	3336.3	2012.56	1432.29	4537.13	1411.13
Q1/2013	2013-03-31	15681.1	2357.7	2395.57	3328.92	1991.9	1447.05	4591.55	1406.29
Q2/2013	2013-06-30	15711.1	2370.63	2411.9	3358.43	1992.08	1456.43	4630.55	1405.11
Q3/2013	2013-09-30	15832.4	2391.88	2411.72	3375.43	1998.78	1468.36	4665.95	1404.15
Q4/2013	2013-12-31	15986.8	2403.08	2421.77	3389.23	1996.38	1483.16	4664.48	1408.16
Q1/2014	2014-03-31	15950	2423.22	2423.59	3419.06	1997.08	1485.01	4709.88	1413.72
Q2/2014	2014-06-30	16130.5	2443.39	2429.61	3413.28	1995.66	1502.81	4623.55	1419.19
Q3/2014	2014-09-30	16336.6	2460.51	2440.46	3424.19	2000.45	1513.75	4621.71	1428.84
Q4/2014	2014-12-31	16418.3	2476.89	2443.14	3454.66	2000.5	1520.63	4650.55	1439.56
Q1/2015	2015-03-31	16549.7	2487.88	2453.42	3458.51	2005.05	1517.59	4720.26	1454.7
Q2/2015	2015-06-30	16661.9	2502.03	2452.88	3473.91	2013.38	1515.39	4716.89	1467.05
Q3/2015	2015-09-30	16729.5	2512.86	2462.19	3485.13	2017.86	1523.96	4720.97	1480.83
Q4/2015	2015-12-31	16749.7	2531.54	2468.36	3499.89	2023.64	1525.54	4706.36	1494.41
Q1/2016	2016-03-31	16774	2539.75	2484.55	3522.02	2028.31	1534.95	4746.28	1505.61
Q2/2016	2016-06-30	16867	2543.72	2478.87	3538.38	2030.27	1530.92	4756.65	1517.46
Q3/2016	2016-09-30	16983.1	2555.72	2483.79	3550.25	2034.94	1547.02	4765.62	1528.29
Q4/2016	2016-12-31	17057.2	2574.67	2498.88	3565.01	2044.77	1555.6	4777.47	1538.72
Q1/2017	2017-03-31	17109.7	2584.76	2518.18	3597.08	2055.14	1570.96	4809.68	1550.82
Q2/2017	2017-06-30	17239.1	2590.26	2534.76	3619.86	2063.23	1588.57	4835.06	1564.23
Q3/2017	2017-09-30	17373.5	2599.36	2552.05	3646.48	2070.31	1595.08	4859.03	1575.12
Q4/2017	2017-12-31	17497.6	2608.6	2569.32	3668.61	2077.59	1601.86	4871.43	1585.77
Q1/2018	2018-03-31	17584	2614.73	2573.4	3679.52	2083.44	1607.2	4864.1	1596.81

## Sheet: GDP Deflator
		GDP Deflator Index									Q1/1960 !Q	.excel_last	B111GDP@OECDNAQ	B112GDP@OECDNAQ	B132GDP@OECDNAQ	B134GDP@OECDNAQ	B136GDP@OECDNAQ	B156GDP@OECDNAQ	B158GDP@OECDNAQ	B184GDP@OECDNAQ
		United States: Gross Domestic Product Implicit Deflator	United Kingdom: Gross Domestic Product Implicit Deflator	France: Gross Domestic Product Implicit Deflator	Germany: Gross Domestic Product Implicit Deflator	Italy: Gross Domestic Product Implicit Deflator	Canada: Gross Domestic Product Implicit Deflator	Japan: Gross Domestic Product Implicit Deflator	Spain: Gross Domestic Product Implicit Deflator		.DESC		United States: Gross Domestic Product (SAAR, Mil.US$, PPP)	United Kingdom: Gross Domestic Product (SAAR, Mil.US$, PPP)	France: Gross Domestic Product (SAAR, Mil.US$, PPP)	Germany: Gross Domestic Product (SAAR, Mil.US$, PPP)	Italy: Gross Domestic Product (SAAR, Mil.US$, PPP)	Canada: Gross Domestic Product (SAAR, Mil.US$, PPP)	Japan: Gross Domestic Product (SAAR, Bil.US$, PPP)	Spain: Gross Domestic Product (SAAR, Mil.US$, PPP)
											.T1		Q1-1947	Q1-1955	Q1-1960	Q1-1960	Q1-1960	Q1-1960	Q1-1960	Q1-1960
											.TN		Q1-2018	Q1-2018	Q1-2018	Q1-2018	Q1-2018	Q1-2018	Q1-2018	Q1-2018
											.LSOURCE		Organization for Economic Cooperation & Development	Organization for Economic Cooperation & Development	Organization for Economic Cooperation & Development	Organization for Economic Cooperation & Development	Organization for Economic Cooperation & Development	Organization for Economic Cooperation & Development	Organization for Economic Cooperation & Development	Organization for Economic Cooperation & Development
											.DTLM		Jun-29-2018 05:33	Jul-02-2018 06:06	Jun-26-2018 05:33	Jun-20-2018 10:29	Jun-20-2018 10:29	Jun-20-2018 10:29	Jun-20-2018 10:30	Jun-20-2018 10:30
Q1/1960	1960-03-31	17.3974	17.4871	15.8701	17.3613	15.9884	17.2491	17.1287	15.0254		Q1/1960	22006	543347	114863	84609.6	154069	84190.5	46336	94.76	34477.7
Q2/1960	1960-06-30	17.4428	17.5591	15.9299	17.3796	16.0244	17.2736	17.1694	15.0791		Q2/1960	22097	542697	114509	85247.6	156975	85618.6	45509.4	95.16	35312.3
Q3/1960	1960-09-30	17.5058	17.6102	15.9929	17.3623	16.0889	17.323	17.2236	15.1508		Q3/1960	22189	546012	116585	86225.4	162240	87225.6	46336	98.74	36472.7
Q4/1960	1960-12-31	17.5596	17.6825	16.0439	17.3234	16.1332	17.376	17.2681	15.2068		Q4/1960	22281	541063	117778	87526	163531	87532.7	46631.5	102.8	37344.4
Q1/1961	1961-03-31	17.5986	17.716	16.081	17.2319	16.1735	17.387	17.2936	15.2374		Q1/1961	22371	545949	119923	89138.9	164313	90895.4	46472.2	106.08	38489.3
Q2/1961	1961-06-30	17.6407	17.7241	16.1085	17.1865	16.2126	17.4198	17.3315	15.2693		Q2/1961	22462	557430	120461	90720.4	162997	93042.9	47730.9	108.58	40282.7
Q3/1961	1961-09-30	17.6875	17.8347	16.1514	17.1868	16.2496	17.4613	17.3813	15.2967		Q3/1961	22554	568228	120579	92410.5	166345	95428.5	49000.2	110.98	41179.3
Q4/1961	1961-12-31	17.7449	17.8544	16.2028	17.2341	16.2986	17.5129	17.4469	15.3448		Q4/1961	22646	581624	120519	94279.3	167562	97547.4	49833.1	116.51	42474.3
Q1/1962	1962-03-31	17.8371	17.936	16.2943	17.3527	16.3871	17.5914	17.5554	15.4222		Q1/1962	22736	595176	121642	96519.2	171202	99528.5	51381.9	118.81	43698.4
Q2/1962	1962-06-30	17.8664	17.9868	16.3189	17.4021	16.4196	17.6195	17.5977	15.4532		Q2/1962	22827	602580	123120	98226.7	173478	100800	51838.1	120.76	44804.7
Q3/1962	1962-09-30	17.9033	18.0242	16.3476	17.4495	16.4494	17.6637	17.6386	15.4866		Q3/1962	22919	609575	124125	99816	178117	101589	52650	122.52	46001.4
Q4/1962	1962-12-31	17.9382	18.0767	16.3751	17.4854	16.4778	17.7057	17.6696	15.5221		Q4/1962	23011	613132	124038	101235	178098	103292	53848.1	125.3	46230.3
Q1/1963	1963-03-31	18.017	18.1215	16.4439	17.5554	16.5535	17.7939	17.7346	15.5862		Q1/1963	23101	622679	124987	99967.5	172556	104456	54441	127.48	49091.9
Q2/1963	1963-06-30	18.0467	18.1668	16.4809	17.5796	16.5792	17.8332	17.7533	15.6151		Q2/1963	23192	631835	130673	104666	180543	107486	55361	131.37	49223.8
Q3/1963	1963-09-30	18.0688	18.1974	16.5007	17.5986	16.5945	17.8623	17.7701	15.635		Q3/1963	23284	644960	131559	108249	187009	109351	55877.5	135.35	50350
Q4/1963	1963-12-31	18.2156	18.3439	16.6245	17.7407	16.7335	18.0014	17.9144	15.7544		Q4/1963	23376	654840	135563	109401	189431	111401	58081.4	141.15	51679
Q1/1964	1964-03-31	18.274	18.3785	16.6847	17.7994	16.7922	18.0409	17.9755	15.8023		Q1/1964	23467	671149	136636	111864	192672	113448	59651.4	146.15	52129.1
Q2/1964	1964-06-30	18.3178	18.4429	16.7247	17.8433	16.8353	18.087	18.0217	15.8363		Q2/1964	23558	680757	139482	113207	195507	112589	60010.1	150.06	53102.3
Q3/1964	1964-09-30	18.3922	18.53	16.7978	17.9168	16.9021	18.1644	18.1011	15.9091		Q3/1964	23650	692807	140693	115096	198353	112845	60900.5	153.05	53747.1
Q4/1964	1964-12-31	18.4758	18.611	16.8799	17.9988	16.9829	18.2517	18.1895	15.9917		Q4/1964	23742	698424	143458	116704	201971	112910	61516.1	155.72	55200.8
Q1/1965	1965-03-31	18.5687	18.7164	16.9682	18.0896	17.0693	18.3469	18.2862	16.0599		Q1/1965	23832	719248	143868	117575	206312	115016	63779.4	157.82	56616.2
Q2/1965	1965-06-30	18.6525	18.7805	17.0366	18.1717	17.1374	18.4439	18.3742	16.1335		Q2/1965	23923	732369	144515	120986	210518	117777	64718.1	160.56	57118
Q3/1965	1965-09-30	18.7259	18.8607	17.1039	18.2439	17.2072	18.5238	18.4471	16.2013		Q3/1965	24015	750184	146338	123220	212763	119832	65876.4	164.85	57942.1
Q4/1965	1965-12-31	18.8534	18.986	17.2171	18.3691	17.3264	18.6525	18.5746	16.3107		Q4/1965	24107	773104	148222	125761	215504	122476	67965.5	168.57	60077.1
Q1/1966	1966-03-31	18.9755	19.1115	17.3299	18.4895	17.4422	18.7774	18.6872	16.412		Q1/1966	24197	797328	149448	127728	220856	124486	69728.9	174.13	60038.8
Q2/1966	1966-06-30	19.131	19.2661	17.4747	18.6413	17.585	18.9301	18.8346	16.5542		Q2/1966	24288	807153	151532	130743	223354	127293	71776.4	182.37	63688.6
Q3/1966	1966-09-30	19.3168	19.4613	17.6415	18.8219	17.7522	19.1115	19.0146	16.702		Q3/1966	24380	820798	153572	133496	225795	132134	72436.4	188.59	65531.7
Q4/1966	1966-12-31	19.4809	19.6404	17.7927	18.9801	17.8959	19.2643	19.1749	16.8412		Q4/1966	24472	834864	154338	135375	224137	133842	73896.6	193.98	66257.1
Q1/1967	1967-03-31	19.5622	19.7079	17.8699	19.0573	17.9769	19.3479	19.2519	16.9197		Q1/1967	24562	846046	156976	138293	223928	137130	74045	199.92	66749.2
Q2/1967	1967-06-30	19.6608	19.8253	17.9592	19.1541	18.0726	19.4458	19.3495	17.0099		Q2/1967	24653	851058	160128	140505	224363	140825	75981.1	206.34	67911.4
Q3/1967	1967-09-30	19.8488	19.9992	18.134	19.3406	18.2411	19.622	19.5349	17.163		Q3/1967	24745	866614	162243	143229	232017	144328	76924.8	215.54	69698
Q4/1967	1967-12-31	20.0672	20.2234	18.3215	19.5601	18.4387	19.8375	19.7503	17.3757		Q4/1967	24837	883201	164936	146120	237668	148774	78063.9	222.13	70054.2
Q1/1968	1968-03-31	20.2899	20.448	18.5183	19.787	18.6514	20.0601	19.9735	17.5691		Q1/1968	24928	911135	172831	151987	243238	150857	79580.6	230	72345.3
Q2/1968	1968-06-30	20.504	20.6775	18.7398	20.0022	18.8499	20.2618	20.1863	17.7529		Q2/1968	25019	936297	174014	142145	247795	155656	82563.4	240.38	75320.1
Q3/1968	1968-09-30	20.7063	20.8703	18.907	20.2018	19.0323	20.4583	20.3839	17.9127		Q3/1968	25111	952347	179131	159724	255762	160941	84490	248.23	76610.9
Q4/1968	1968-12-31	20.9995	21.1591	19.1782	20.4859	19.2909	20.7414	20.6689	18.156		Q4/1968	25203	970129	182337	163675	263274	166946	86839.9	266.04	80799.4
Q1/1969	1969-03-31	21.217	21.3749	19.3953	20.6918	19.4895	20.9585	20.8806	18.3522		Q1/1969	25293	995419	183787	165833	272611	171307	88885.9	271.13	84569.9
Q2/1969	1969-06-30	21.4879	21.628	19.6235	20.9499	19.7406	21.2318	21.143	18.5784		Q2/1969	25384	1011361	187322	171899	279553	176647	90477.7	282.53	85323
Q3/1969	1969-09-30	21.7903	21.9578	19.8933	21.2384	20.0307	21.533	21.4399	18.863		Q3/1969	25476	1032016	191251	175911	289491	179671	92728.8	293.36	88246.1
Q4/1969	1969-12-31	22.0709	22.3114	20.1474	21.5057	20.289	21.8236	21.7156	19.1011		Q4/1969	25568	1040741	195326	179565	297640	178310	95303.8	308.73	90360.6
Q1/1970	1970-03-31	22.3817	22.7537	20.4284	21.8024	20.5601	22.1574	22.0262	19.3856		Q1/1970	25658	1053528	197925	185549	296930	191527	97372.6	322.74	93421
Q2/1970	1970-06-30	22.6938	23.1331	20.7222	22.1018	20.8722	22.4799	22.3427	19.6495		Q2/1970	25749	1070110	205970	190593	312975	195854	98749.2	331.35	94843.1
Q3/1970	1970-09-30	22.8803	23.3877	20.914	22.2814	21.0405	22.6833	22.5436	19.8096		Q3/1970	25841	1088461	210302	195007	321413	201394	100659	343.29	96104.4
Q4/1970	1970-12-31	23.1819	23.7299	21.2107	22.5742	21.296	22.9859	22.8634	20.0639		Q4/1970	25933	1091462	215244	200878	328397	204068	102174	347.04	98106.4
Q1/1971	1971-03-31	23.5361	24.0868	21.5926	22.9227	21.5997	23.3523	23.2485	20.376		Q1/1971	26023	1137812	217190	204760	327060	205895	103181	356.1	100410
Q2/1971	1971-06-30	23.8456	24.392	21.892	23.2255	21.8627	23.6624	23.5805	20.6293		Q2/1971	26114	1159355	223871	211381	338335	209282	107608	367.01	103642
Q3/1971	1971-09-30	24.0884	24.6374	22.135	23.4631	22.0842	23.8967	23.8323	20.8355		Q3/1971	26206	1180313	230058	217212	347709	214499	111669	375.45	106604
Q4/1971	1971-12-31	24.2883	24.8779	22.3217	23.6581	22.2958	24.1006	24.0324	21.0112		Q4/1971	26298	1193585	233223	220921	350303	217777	113901	382.05	109667
Q1/1972	1972-03-31	24.6642	25.269	22.659	24.0243	22.6899	24.4715	24.3956	21.3451		Q1/1972	26389	1233807	237138	227197	356085	224075	115203	400.46	113218
Q2/1972	1972-06-30	24.8155	25.4633	22.8145	24.172	22.8523	24.6147	24.5327	21.4727		Q2/1972	26480	1270122	245357	229635	364126	225576	119172	410.29	116586
Q3/1972	1972-09-30	25.048	25.7298	23.0626	24.3999	23.0652	24.8412	24.7465	21.6698		Q3/1972	26572	1293837	248599	234193	376144	230747	120542	422.7	120241
Q4/1972	1972-12-31	25.3661	26.1384	23.3846	24.7117	23.3622	25.1475	25.0461	21.9367		Q4/1972	26664	1332023	256498	241405	386870	234829	124948	438.58	124133
Q1/1973	1973-03-31	25.6609	26.4434	23.7106	25.0025	23.6644	25.4302	25.3164	22.1809		Q1/1973	26754	1380680	272350	249647	396834	240011	129684	458.14	127825
Q2/1973	1973-06-30	26.0516	26.7784	24.1431	25.3847	24.034	25.8184	25.6849	22.5229		Q2/1973	26845	1417595	276193	256948	405877	251064	133100	469.06	132110
Q3/1973	1973-09-30	26.5491	27.3902	24.6954	25.87	24.4813	26.3045	26.1633	22.9662		Q3/1973	26937	1436813	279800	265082	414992	263874	136066	479.19	136935
Q4/1973	1973-12-31	27.0774	28.0253	25.2955	26.3845	24.9133	26.8317	26.6718	23.4387		Q4/1973	27029	1479069	285072	274995	424299	275090	141407	494.54	142051
Q1/1974	1974-03-31	27.5919	28.607	25.8884	26.8846	25.4211	27.345	27.1673	23.9053		Q1/1974	27119	1494654	283059	284140	435997	282973	145162	486.42	147340
Q2/1974	1974-06-30	28.2481	29.38	26.5621	27.5232	26.0304	27.9962	27.8137	24.4647		Q2/1974	27210	1534220	294902	292995	446012	292522	150263	501.58	152693
Q3/1974	1974-09-30	29.0667	30.248	27.3241	28.3212	26.7859	28.8289	28.6373	25.1394		Q3/1974	27302	1563396	305583	304244	458943	301514	154551	523.04	158012
Q4/1974	1974-12-31	29.9227	31.1453	28.0676	29.1569	27.5367	29.6839	29.5102	25.8754		Q4/1974	27394	1603004	310079	307803	466519	303487	158391	536.06	162745
Q1/1975	1975-03-31	30.6014	31.8652	28.5735	29.8207	28.1206	30.3869	30.228	26.4761		Q1/1975	27484	1619553	317403	311941	474387	304530	161045	549.82	165688
Q2/1975	1975-06-30	31.0592	32.3879	28.9083	30.268	28.5141	30.8696	30.7133	26.8947		Q2/1975	27575	1656448	317334	316393	479085	308632	165743	571.05	168167
Q3/1975	1975-09-30	31.6124	32.9746	29.3728	30.806	28.9966	31.4334	31.283	27.3752		Q3/1975	27667	1713812	321993	322723	492905	318317	171921	588.26	171920
Q4/1975	1975-12-31	32.1393	33.5652	29.8513	31.3169	29.4485	31.9388	31.811	27.8145		Q4/1975	27759	1765867	331461	332408	510927	326898	176701	604.48	175906
Q1/1976	1976-03-31	32.4733	33.9584	30.2003	31.6379	29.7534	32.2448	32.1298	28.0957		Q1/1976	27850	1824509	340731	341230	520801	336102	181494	615.71	179450
Q2/1976	1976-06-30	32.8027	34.3279	30.5556	31.9567	30.1517	32.572	32.4469	28.3766		Q2/1976	27941	1856944	343828	349361	533863	346758	187299	625.46	183337
Q3/1976	1976-09-30	33.2265	34.7691	30.9948	32.3691	30.5739	32.9622	32.8657	28.7425		Q3/1976	28033	1890500	352580	356058	540914	360549	190368	642.44	187502
Q4/1976	1976-12-31	33.8148	35.4019	31.5692	32.9436	31.1627	33.5465	33.4531	29.2451		Q4/1976	28125	1938413	366571	367176	560708	373868	194152	654.7	192246
Q1/1977	1977-03-31	34.3592	35.9772	32.1019	33.4775	31.7133	34.1038	33.9976	29.7093		Q1/1977	28215	1992534	372713	377498	574661	380624	200105	679.91	196844
Q2/1977	1977-06-30	34.8416	36.5126	32.5933	33.9513	32.1829	34.6018	34.483	30.1361		Q2/1977	28306	2060165	375516	384943	586098	384110	204180	694.47	200578
Q3/1977	1977-09-30	35.2699	36.9639	33.0391	34.3723	32.5637	35.0525	34.9143	30.5262		Q3/1977	28398	2122387	382792	391997	593195	385019	207835	707.95	203850
Q4/1977	1977-12-31	36.036	37.7689	33.7972	35.1225	33.2123	35.8108	35.6863	31.1832		Q4/1977	28490	2168716	397909	401908	616571	396052	215713	733.42	209628
Q1/1978	1978-03-31	36.5729	38.4101	34.3444	35.6495	33.6623	36.3623	36.23	31.6605		Q1/1978	28580	2208688	408155	414089	628401	407979	220909	758.66	214165
Q2/1978	1978-06-30	37.2424	39.1439	35.0137	36.3029	34.2395	37.0474	36.9005	32.2431		Q2/1978	28671	2336563	420982	429177	642455	422152	227136	780.21	218548
Q3/1978	1978-09-30	37.8651	39.7875	35.6447	36.9082	34.7818	37.6791	37.5144	32.7921		Q3/1978	28763	2398866	433693	436526	661732	431096	232674	803.45	221996
Q4/1978	1978-12-31	38.6614	40.6334	36.4132	37.679	35.5017	38.4754	38.299	33.4753		Q4/1978	28855	2482159	446953	449734	683450	446723	239611	832.09	226286
Q1/1979	1979-03-31	39.3525	41.4071	37.0808	38.3447	36.182	39.1685	38.9682	34.0679		Q1/1979	28945	2531555	453675	461918	696384	462477	246025	859.29	229925
Q2/1979	1979-06-30	40.3041	42.3791	37.9688	39.2677	37.1063	40.1276	39.9034	34.8769		Q2/1979	29036	2595909	484909	477501	735293	477740	255470	895.99	235751
Q3/1979	1979-09-30	41.1649	43.4145	38.7702	40.1071	37.9731	40.9823	40.7488	35.6263		Q3/1979	29128	2670388	485898	493154	751011	497360	262600	921.95	241396
Q4/1979	1979-12-31	41.986	44.3005	39.5273	40.9123	38.8032	41.798	41.5572	36.3549		Q4/1979	29220	2730705	501019	503740	770784	520196	269627	944.33	247198
Q1/1980	1980-03-31	42.8594	45.2516	40.3258	41.7743	39.7205	42.65	42.4212	37.1486		Q1/1980	29311	2796523	506801	519666	793330	531516	277068	967.65	254287
Q2/1980	1980-06-30	43.8	46.3057	41.1688	42.6969	40.6058	43.5652	43.3449	37.9455		Q2/1980	29402	2799938	508340	527492	805631	547578	282920	983.51	260624
Q3/1980	1980-09-30	44.8082	47.4414	42.1126	43.6795	41.5424	44.5319	44.3441	38.8239		Q3/1980	29494	2860044	520161	539581	820901	560677	288806	1028.72	265600
Q4/1980	1980-12-31	46.0461	48.8685	43.2601	44.8795	42.6566	45.7134	45.5727	39.8774		Q4/1980	29586	2993525	530119	553950	842334	580623	300606	1079.69	274389
Q1/1981	1981-03-31	47.1962	50.1996	44.3328	45.9878	43.7131	46.7873	46.7168	40.8572		Q1/1981	29676	3131799	543697	569640	873406	591608	314506	1113.58	279539
Q2/1981	1981-06-30	48.0816	51.2182	45.1503	46.8422	44.546	47.6205	47.5968	41.6552		Q2/1981	29767	3167251	556076	583000	887413	604056	323638	1148.44	284684
Q3/1981	1981-09-30	48.9462	52.2052	45.963	47.6796	45.3472	48.4513	48.4576	42.4		Q3/1981	29859	3261203	572956	598253	905656	615205	326334	1166.61	291062
Q4/1981	1981-12-31	49.8631	53.283	46.8394	48.5721	46.2058	49.3282	49.3707	43.1923		Q4/1981	29951	3283536	585458	612973	921881	631942	330726	1197.27	296206
Q1/1982	1982-03-31	50.5612	54.11	47.5338	49.2559	46.858	50.062	50.0698	43.7919		Q1/1982	30041	3273809	595474	626999	938361	640608	331653	1232.83	301554
Q2/1982	1982-06-30	51.17	54.7867	48.1125	49.8525	47.418	50.6839	50.6827	44.3196		Q2/1982	30132	3331281	609698	639043	943882	646422	331903	1256.49	306347
Q3/1982	1982-09-30	51.9068	55.6232	48.7969	50.5729	48.1063	51.4078	51.42	44.9515		Q3/1982	30224	3367072	620641	648487	948057	655455	333675	1280.34	312806
Q4/1982	1982-12-31	52.4836	56.3274	49.3172	51.1366	48.6725	51.9865	51.9982	45.4638		Q4/1982	30316	3407810	632930	659321	960920	661241	334317	1312.73	317486
Q1/1983	1983-03-31	52.9073	56.8801	49.7114	51.5507	49.0258	52.3803	52.4143	45.8444		Q1/1983	30406	3480321	650712	667272	977481	667904	342390	1324.07	321314
Q2/1983	1983-06-30	53.2656	57.289	50.0515	51.9005	49.3592	52.7316	52.7655	46.1607		Q2/1983	30497	3583844	660979	671913	994475	671636	351536	1342.96	325529
Q3/1983	1983-09-30	53.8231	57.9222	50.5797	52.4447	49.8596	53.305	53.318	46.6307		Q3/1983	30589	3692257	675644	680043	1.00281e+06	691080	359385	1377.33	329327
Q4/1983	1983-12-31	54.219	58.3798	50.9491	52.8309	50.2684	53.6946	53.7017	46.9703		Q4/1983	30681	3796121	686871	688228	1.02417e+06	712192	366617	1398.8	333869
Q1/1984	1984-03-31	54.7964	58.9693	51.4853	53.3928	50.811	54.2632	54.2635	47.4711		Q1/1984	30772	3912774	698589	700130	1.04875e+06	718467	376854	1429.71	340220
Q2/1984	1984-06-30	55.2575	59.5273	51.91	53.8412	51.2332	54.7191	54.7122	47.8792		Q2/1984	30863	4015000	699050	707967	1.0409e+06	726769	387453	1463.36	342087
Q3/1984	1984-09-30	55.7056	60.0008	52.3207	54.277	51.6372	55.1648	55.1538	48.2576		Q3/1984	30955	4087378	709195	717598	1.0779e+06	741125	392267	1493.2	347793
Q4/1984	1984-12-31	56.0792	60.4215	52.6607	54.6405	51.987	55.532	55.5223	48.598		Q4/1984	31047	4147606	728354	724015	1.09425e+06	746265	401102	1505.77	350693
Q1/1985	1985-03-31	56.7241	60.8613	53.2672	55.2676	52.574	56.1529	56.1722	49.1498		Q1/1985	31137	4237010	739845	733684	1.10078e+06	759006	411747	1560.73	358633
Q2/1985	1985-06-30	57.0756	61.3299	53.6142	55.6075	52.9077	56.5286	56.527	49.4546		Q2/1985	31228	4302297	761426	743442	1.11865e+06	773913	415834	1602.39	360518
Q3/1985	1985-09-30	57.4065	61.7064	53.9351	55.9272	53.2123	56.8478	56.8598	49.7387		Q3/1985	31320	4394563	766826	752713	1.13973e+06	784603	423476	1632.92	366349
Q4/1985	1985-12-31	57.7381	62.2934	54.2425	56.2466	53.5275	57.1733	57.1893	49.9937		Q4/1985	31412	4453105	776001	760023	1.15312e+06	794514	432454	1664.2	372455
Q1/1986	1986-03-31	58.0203	62.4238	54.5091	56.517	53.7907	57.4576	57.467	50.2721		Q1/1986	31502	4516344	786485	766575	1.15203e+06	803396	434508	1678.93	375586
Q2/1986	1986-06-30	58.2526	62.7075	54.7282	56.7408	54.0051	57.6781	57.6903	50.4606		Q2/1986	31593	4555245	795842	777961	1.1699e+06	811816	438687	1681.31	385972
Q3/1986	1986-09-30	58.4873	62.9902	54.9552	56.9697	54.218	57.9171	57.9209	50.662		Q3/1986	31685	4619627	802920	784385	1.1833e+06	823151	441066	1697.92	384781
Q4/1986	1986-12-31	58.8129	63.3094	55.2581	57.2891	54.5246	58.246	58.2441	50.958		Q4/1986	31777	4669396	821230	790606	1.2018e+06	831205	440375	1720.86	389502
Q1/1987	1987-03-31	59.2404	63.7239	55.6412	57.7099	54.9174	58.6556	58.6696	51.2864		Q1/1987	31867	4736231	833981	798244	1.18024e+06	840622	453742	1732.19	400041
Q2/1987	1987-06-30	59.637	64.1761	56.0042	58.0995	55.2892	59.0516	59.0647	51.645		Q2/1987	31958	4821459	852033	812652	1.21488e+06	859130	462729	1780.4	408864
Q3/1987	1987-09-30	60.07	64.5628	56.4123	58.5237	55.6857	59.4742	59.4911	52.0432		Q3/1987	32050	4900509	877891	824820	1.23222e+06	867788	473180	1829.12	420526
Q4/1987	1987-12-31	60.5677	65.0595	56.8758	59.0105	56.1547	59.9693	59.9851	52.4893		Q4/1987	32142	5022670	894657	844303	1.26235e+06	884513	483313	1891.8	432807
Q1/1988	1988-03-31	61.0438	65.5804	57.32	59.474	56.6011	60.4502	60.4544	52.8828		Q1/1988	32233	5090615	918131	861930	1.26072e+06	904665	494315	1952.11	437454
Q2/1988	1988-06-30	61.6335	66.1213	57.8751	60.0481	57.1408	61.0239	61.0393	53.404		Q2/1988	32324	5207707	931243	876071	1.29597e+06	919094	503441	1968.12	447169
Q3/1988	1988-09-30	62.3598	66.9279	58.5556	60.7542	57.8069	61.7529	61.7564	54.0188		Q3/1988	32416	5299486	957019	898094	1.32607e+06	942024	509497	2035.67	460472
Q4/1988	1988-12-31	62.8595	67.3155	59.0269	61.2392	58.2867	62.2564	62.244	54.4655		Q4/1988	32508	5412713	970856	914225	1.35239e+06	961184	517260	2073.36	463238
Q1/1989	1989-03-31	63.5498	68.1228	59.6706	61.9083	58.9732	62.9138	62.9196	55.059		Q1/1989	32598	5527352	986775	936693	1.38146e+06	978546	528684	2152.41	479329
Q2/1989	1989-06-30	64.207	68.7095	60.2872	62.5467	59.5586	63.5814	63.5593	55.6247		Q2/1989	32689	5628429	1.00177e+06	953973	1.40132e+06	992532	536347	2145.91	489019
Q3/1989	1989-09-30	64.6725	69.3429	60.726	63.0011	59.9417	64.0516	64.0108	56.0308		Q3/1989	32781	5711556	1.01194e+06	972241	1.42439e+06	1.00933e+06	542263	2198.96	499189
Q4/1989	1989-12-31	65.1223	69.7183	61.1422	63.4422	60.287	64.4937	64.4474	56.4178		Q4/1989	32873	5763444	1.01834e+06	990546	1.45099e+06	1.02559e+06	544835	2282.56	501802
Q1/1990	1990-03-31	65.8408	70.5039	61.802	64.1477	60.9135	65.1955	65.1554	57.0354		Q1/1990	32963	5890835	1.03683e+06	1.00815e+06	1.49758e+06	1.04038e+06	555935	2296.65	511739
Q2/1990	1990-06-30	66.5205	71.3176	62.4304	64.8121	61.3765	65.8719	65.8279	57.6107		Q2/1990	33054	5974665	1.0542e+06	1.02323e+06	1.52053e+06	1.05148e+06	559367	2393.54	525686
Q3/1990	1990-09-30	67.1145	72.0492	62.9749	65.3898	61.8639	66.4689	66.4214	58.1214		Q3/1990	33146	6029504	1.05396e+06	1.0359e+06	1.56639e+06	1.06153e+06	560385	2455.62	528764
Q4/1990	1990-12-31	67.6223	72.603	63.4496	65.8807	62.3115	66.9739	66.9257	58.5711		Q4/1990	33238	6023332	1.05851e+06	1.04672e+06	1.60593e+06	1.06227e+06	559581	2469.56	553005
Q1/1991	1991-03-31	68.2968	73.3423	64.0826	66.5304	63.0307	67.6437	67.6057	59.1495		Q1/1991	33328	6054867	1.06628e+06	1.05545e+06	1.66872e+06	1.09573e+06	557000	2516.39	547734
Q2/1991	1991-06-30	68.7641	73.8893	64.5301	66.9834	63.4081	68.1061	68.0764	59.5653		Q2/1991	33419	6143612	1.07292e+06	1.06887e+06	1.6731e+06	1.09626e+06	563373	2563.97	558310
Q3/1991	1991-09-30	69.269	74.425	65.0072	67.4735	63.9051	68.5942	68.5835	60.0056		Q3/1991	33511	6218425	1.07823e+06	1.0788e+06	1.67683e+06	1.10525e+06	568134	2577.35	566685
Q4/1991	1991-12-31	69.643	74.8991	65.3563	67.8402	64.272	68.9531	68.9525	60.3578		Q4/1991	33603	6279296	1.08682e+06	1.09045e+06	1.70778e+06	1.12464e+06	572137	2609.42	572847
Q1/1992	1992-03-31	69.9426	75.0941	65.6426	68.1351	64.5838	69.2579	69.2497	60.6351		Q1/1992	33694	6380798	1.08957e+06	1.10504e+06	1.74269e+06	1.13314e+06	575043	2621.48	581220
Q2/1992	1992-06-30	70.3886	75.5593	66.0512	68.5721	64.9353	69.7059	69.6905	60.9996		Q2/1992	33785	6492299	1.09498e+06	1.11202e+06	1.74239e+06	1.13865e+06	579460	2647.4	577090
Q3/1992	1992-09-30	70.723	75.7028	66.371	68.8991	65.2652	70.0458	70.026	61.2981		Q3/1992	33877	6586548	1.10409e+06	1.11713e+06	1.74548e+06	1.1419e+06	585419	2663.28	580284
Q4/1992	1992-12-31	71.2014	76.1258	66.8224	69.3651	65.6694	70.5123	70.5039	61.6716		Q4/1992	33969	6697553	1.11805e+06	1.12229e+06	1.75356e+06	1.14105e+06	592652	2664.36	580016
Q1/1993	1993-03-31	71.6062	76.47	67.2298	69.758	66.0711	70.9128	70.9067	62.0261		Q1/1993	34059	6748182	1.13133e+06	1.12136e+06	1.74797e+06	1.14643e+06	599813	2709.78	577908
Q2/1993	1993-06-30	72.0417	77.0041	67.6411	70.1819	66.4756	71.3563	71.3477	62.4076		Q2/1993	34150	6829594	1.14502e+06	1.12981e+06	1.75948e+06	1.15066e+06	609055	2709.37	581423
Q3/1993	1993-09-30	72.4754	77.6904	68.0389	70.6042	66.8749	71.7565	71.7782	62.8005		Q3/1993	34242	6904222	1.16452e+06	1.1382e+06	1.78255e+06	1.15575e+06	618319	2706.15	592123
Q4/1993	1993-12-31	72.8531	78.4877	68.3693	70.9733	67.2146	72.1471	72.1557	63.1428		Q4/1993	34334	7032844	1.18448e+06	1.14632e+06	1.79075e+06	1.17014e+06	624360	2737.52	597593
Q1/1994	1994-03-31	73.2066	79.6214	68.6822	71.3199	67.5621	72.4983	72.5119	63.4339		Q1/1994	34424	7136259	1.21621e+06	1.15913e+06	1.8215e+06	1.18514e+06	636630	2773.78	605314
Q2/1994	1994-06-30	73.5715	79.7343	69.0094	71.6747	67.8936	72.8408	72.871	63.7588		Q2/1994	34515	7269847	1.23207e+06	1.17794e+06	1.8369e+06	1.19958e+06	649011	2772.98	609748
Q3/1994	1994-09-30	73.9693	79.0401	69.3911	72.059	68.239	73.2519	73.2677	64.0974		Q3/1994	34607	7352255	1.23522e+06	1.1912e+06	1.86062e+06	1.2132e+06	661013	2823.5	617853
Q4/1994	1994-12-31	74.3763	77.6267	69.8088	72.45	68.5956	73.6529	73.6659	64.4297		Q4/1994	34699	7476661	1.22004e+06	1.20972e+06	1.89542e+06	1.23099e+06	669454	2825.85	623381
Q1/1995	1995-03-31	74.8034	75.4265	70.2627	72.8575	68.9566	74.0778	74.0873	64.8142		Q1/1995	34789	7545296	1.18927e+06	1.22341e+06	1.8974e+06	1.253e+06	679526	2870.55	633803
Q2/1995	1995-06-30	75.1321	74.2239	70.5545	73.1819	69.2865	74.4056	74.4098	65.0882		Q2/1995	34880	7604923	1.17453e+06	1.23447e+06	1.92248e+06	1.25988e+06	682765	2918.74	640858
Q3/1995	1995-09-30	75.4896	73.9839	70.7885	73.5457	69.6426	74.7529	74.7607	65.4		Q3/1995	34972	7706531	1.18223e+06	1.2401e+06	1.93854e+06	1.27199e+06	686849	2965.16	646993
Q4/1995	1995-12-31	75.8617	74.6389	70.97	73.9356	70.0515	75.1206	75.1284	65.7494		Q4/1995	35064	7799493	1.19606e+06	1.24386e+06	1.94788e+06	1.29006e+06	693026	2986.87	655031
Q1/1996	1996-03-31	76.2723	76.171	71.3795	74.3755	70.4426	75.5178	75.5424	66.1406		Q1/1996	35155	7893146	1.23162e+06	1.25942e+06	1.93987e+06	1.30288e+06	697123	3031.47	663181
Q2/1996	1996-06-30	76.5627	77.4178	71.7982	74.6055	70.7049	75.8048	75.8303	66.4319		Q2/1996	35246	8061535	1.25576e+06	1.26989e+06	1.97366e+06	1.30092e+06	704644	3077.53	670340
Q3/1996	1996-09-30	76.7785	78.2352	71.958	74.6689	70.8702	76.0326	76.0446	66.6643		Q3/1996	35338	8159043	1.27769e+06	1.28038e+06	1.98736e+06	1.3069e+06	712961	3085.35	679239
Q4/1996	1996-12-31	77.168	78.6679	72.313	74.8056	71.1555	76.4346	76.4335	67.0286		Q4/1996	35430	8287078	1.29699e+06	1.28799e+06	2.00209e+06	1.31138e+06	722431	3136.85	685684
Q1/1997	1997-03-31	77.6469	78.5487	72.8601	74.9302	71.4825	76.9036	76.9107	67.4716		Q1/1997	35520	8402060	1.31999e+06	1.30261e+06	1.99337e+06	1.32095e+06	736455	3167.37	698075
Q2/1997	1997-06-30	77.8575	78.6353	73.221	74.8793	71.7579	77.0956	77.111	67.7865		Q2/1997	35611	8551940	1.33312e+06	1.32424e+06	2.02014e+06	1.34406e+06	746607	3151.96	707740
Q3/1997	1997-09-30	78.1354	78.9977	73.676	74.9784	72.2666	77.3731	77.3965	68.2549		Q3/1997	35703	8691756	1.34584e+06	1.34211e+06	2.03063e+06	1.36175e+06	758247	3173.88	719837
Q4/1997	1997-12-31	78.3952	78.6631	74.106	75.1452	72.9256	77.6318	77.6655	68.8122		Q4/1997	35795	8788320	1.35404e+06	1.36441e+06	2.04961e+06	1.39675e+06	768074	3186.65	736196
Q1/1998	1998-03-31	78.5229	78.4844	74.4077	75.2692	73.6725	77.7407	77.8083	69.3342		Q1/1998	35885	8889732	1.36122e+06	1.38215e+06	2.06945e+06	1.40189e+06	779936	3153.92	749152
Q2/1998	1998-06-30	78.6873	78.2292	74.6464	75.492	74.2138	77.9156	77.9669	69.7312		Q2/1998	35976	8994738	1.3691e+06	1.39857e+06	2.0689e+06	1.41765e+06	782031	3148.56	759137
Q3/1998	1998-09-30	78.9819	78.0829	74.9052	75.8883	74.6215	78.2072	78.235	69.9947		Q3/1998	36068	9146521	1.37673e+06	1.41396e+06	2.08527e+06	1.42734e+06	792239	3164.32	771142
Q4/1998	1998-12-31	79.2281	78.0417	75.0173	76.2973	74.7809	78.507	78.4253	70.0195		Q4/1998	36160	9325650	1.38939e+06	1.42654e+06	2.09603e+06	1.42374e+06	806020	3199.4	779521
Q1/1999	1999-03-31	79.6242	77.9287	75.1722	76.9068	74.7861	78.9793	78.7501	69.9695		Q1/1999	36250	9447103	1.39521e+06	1.43788e+06	2.12971e+06	1.43225e+06	825566	3168.44	785274
Q2/1999	1999-06-30	79.8916	77.9295	75.3605	77.2116	74.8133	79.2372	79.0395	69.9712		Q2/1999	36341	9557005	1.39609e+06	1.45346e+06	2.14278e+06	1.4389e+06	835217	3195.57	797134
Q3/1999	1999-09-30	80.1805	78.305	75.7372	77.3475	74.9621	79.3951	79.4524	70.1911		Q3/1999	36433	9712280	1.42786e+06	1.47764e+06	2.16902e+06	1.4538e+06	849918	3227.58	809192
Q4/1999	1999-12-31	80.5476	79.2335	76.3567	77.3638	75.2962	79.4748	80.0433	70.6637		Q4/1999	36525	9926101	1.46465e+06	1.50854e+06	2.19659e+06	1.48098e+06	862864	3251.32	824226
Q1/2000	2000-03-31	81.1635	80.8284	77.4071	77.421	75.9379	79.6964	80.9998	71.5429		Q1/2000	36616	10031031	1.50674e+06	1.54533e+06	2.21886e+06	1.51096e+06	879079	3354.28	847788
Q2/2000	2000-06-30	81.6229	82.0929	78.2563	77.5008	76.3772	79.9511	81.6798	72.1772		Q2/2000	36707	10278340	1.53967e+06	1.57659e+06	2.24366e+06	1.53054e+06	892394	3389.51	865800
Q3/2000	2000-09-30	82.1523	83.0648	79.1383	77.8323	76.7987	80.3971	82.3018	72.7876		Q3/2000	36799	10357445	1.56227e+06	1.60505e+06	2250062	1.54729e+06	906438	3418.11	882599
Q4/2000	2000-12-31	82.5937	83.6558	79.8886	78.2531	77.0403	80.9083	82.7011	73.2055		Q4/2000	36891	10472285	1.576e+06	1.63402e+06	2.26396e+06	1.57608e+06	913825	3466.84	897463
Q1/2001	2001-03-31	83.1127	83.7543	80.6786	78.95	77.2951	81.6558	83.0332	73.5858		Q1/2001	36981	10508121	1.59869e+06	1.65847e+06	2.32145e+06	1.58707e+06	927067	3501.35	911129
Q2/2001	2001-06-30	83.6993	84.2643	81.6266	79.7422	77.7258	82.2372	83.5931	74.284		Q2/2001	37072	10638384	1.62109e+06	1.68117e+06	2.34675e+06	1.59157e+06	936078	3508.03	927084
Q3/2001	2001-09-30	83.9735	84.4943	82.3724	80.2926	78.0013	82.2869	83.9729	74.9712		Q3/2001	37164	10639486	1.63762e+06	1.70199e+06	2.35611e+06	1.59044e+06	935934	3484.9	944974
Q4/2001	2001-12-31	84.2278	84.9745	83.2054	80.8658	78.3833	82.1502	84.4833	75.9095		Q4/2001	37256	10701317	1.65427e+06	1.71924e+06	2.37573e+06	1.59901e+06	940107	3496.74	963582
Q1/2002	2002-03-31	84.4976	85.7685	84.1848	81.4912	78.9315	81.9188	85.1602	77.1326		Q1/2002	37346	10834445	1.67765e+06	1.74462e+06	2.38671e+06	1.60888e+06	951426	3528.92	984681
Q2/2002	2002-06-30	84.8119	86.5114	84.7373	82.1029	79.4255	82.0894	85.7392	78.0611		Q2/2002	37437	10934752	1.70335e+06	1.76527e+06	2.41085e+06	1.62691e+06	958842	3580.54	1.00403e+06
Q3/2002	2002-09-30	85.1907	87.0578	84.8782	82.7281	79.9285	82.5199	86.1839	78.6928		Q3/2002	37529	11037057	1.7271e+06	1.77454e+06	2.4407e+06	1.64073e+06	972291	3613.4	1.01827e+06
Q4/2002	2002-12-31	85.6516	87.4659	84.6375	83.3744	80.4327	83.3352	86.5175	79.042		Q4/2002	37621	11103834	1.75075e+06	1.77016e+06	2.4545e+06	1.65749e+06	987337	3636.97	1.03047e+06
Q1/2003	2003-03-31	86.179	87.3927	84.0122	84.0281	80.9451	84.4974	86.734	79.0952		Q1/2003	37711	11230078	1.76079e+06	1.75972e+06	2.44377e+06	1.66306e+06	1.00662e+06	3642.05	1.04134e+06
Q2/2003	2003-06-30	86.4555	87.3285	83.3538	84.5009	81.0848	85.0942	86.7808	79.0957		Q2/2003	37802	11370653	1.77615e+06	1.74216e+06	2.45805e+06	1.66068e+06	1.01223e+06	3673.16	1.04842e+06
Q3/2003	2003-09-30	86.9345	88.081	83.1195	85.236	81.2909	85.7787	87.154	79.4525		Q3/2003	37894	11625137	1.80978e+06	1.74846e+06	2.49181e+06	1.66681e+06	1.02422e+06	3703.87	1.06038e+06
Q4/2003	2003-12-31	87.3467	88.8712	83.0228	85.9781	81.2172	86.1344	87.5791	79.9124		Q4/2003	37986	11816827	1.84076e+06	1.76053e+06	2.52274e+06	1.67863e+06	1.03551e+06	3763.28	1.07747e+06
Q1/2004	2004-03-31	88.1083	90.4136	83.4713	87.1363	81.3339	86.6221	88.47	80.8639		Q1/2004	38077	11988403	1.88296e+06	1.78571e+06	2.5561e+06	1.68881e+06	1.04889e+06	3831.11	1.09692e+06
Q2/2004	2004-06-30	88.8752	91.6142	84.0192	87.9963	81.4861	87.3249	89.2845	81.6896		Q2/2004	38168	12181398	1.91527e+06	1.80882e+06	2.59022e+06	1.69747e+06	1.0699e+06	3865.05	1.11672e+06
Q3/2004	2004-09-30	89.422	91.6229	84.4952	88.3198	81.431	87.9894	89.7749	82.1813		Q3/2004	38260	12367744	1.91861e+06	1.82614e+06	2.595e+06	1.69795e+06	1.09086e+06	3906.58	1.13476e+06
Q4/2004	2004-12-31	90.0493	91.1486	85.1846	88.3996	81.4982	88.93	90.2482	82.6124		Q4/2004	38352	12562163	1.91349e+06	1.85361e+06	2.59986e+06	1.70213e+06	1.11043e+06	3916.76	1.14773e+06
Q1/2005	2005-03-31	90.8839	90.3378	86.2317	88.3503	81.637	90.2951	90.8492	83.088		Q1/2005	38442	12813729	1.91445e+06	1.88137e+06	2.59339e+06	1.70077e+06	1.13132e+06	3961.82	1.16601e+06
Q2/2005	2005-06-30	91.5432	90.3721	87.1296	88.3988	82.0263	91.3652	91.3439	83.8902		Q2/2005	38533	12974083	1.93642e+06	1.90471e+06	2.61211e+06	1.72548e+06	1.15288e+06	4014.56	1.18927e+06
Q3/2005	2005-09-30	92.3995	90.9875	88.261	88.9043	82.9463	92.5143	92.1155	85.362		Q3/2005	38625	13205445	1.97241e+06	1.93889e+06	2.64838e+06	1.75648e+06	1.18175e+06	4087.04	1.22161e+06
Q4/2005	2005-12-31	93.1001	92.1365	89.299	89.5327	84.2031	93.3575	92.8065	87.2284		Q4/2005	38717	13381629	2.02724e+06	1.9755e+06	2.67727e+06	1.7881e+06	1.20433e+06	4126.42	1.26137e+06
Q1/2006	2006-03-31	93.8324	93.7694	90.4259	90.4797	85.7284	94.0058	93.6174	89.7048		Q1/2006	38807	13648904	2.06867e+06	2.01714e+06	2.7308e+06	1.82699e+06	1.22241e+06	4165.62	1.31123e+06
Q2/2006	2006-06-30	94.587	95.1033	91.4573	91.3908	87.1891	94.737	94.4305	91.7941		Q2/2006	38898	13799794	2.10277e+06	2.06016e+06	2.80244e+06	1.86907e+06	1.23251e+06	4216.42	1.35578e+06
Q3/2006	2006-09-30	95.2469	95.8254	92.3002	92.1446	88.269	95.369	95.1203	93.3141		Q3/2006	38990	13908498	2.12009e+06	2.07957e+06	2.85377e+06	1.89893e+06	1.24419e+06	4239.91	1.39184e+06
Q4/2006	2006-12-31	95.5799	95.467	92.7241	92.517	88.8341	95.6736	95.4465	94.0118		Q4/2006	39082	14066370	2.11961e+06	2.10464e+06	2.9027e+06	1.93597e+06	1.25287e+06	4306.45	1.41557e+06
Q1/2007	2007-03-31	96.654	95.2387	93.7898	93.5386	89.7943	96.7453	96.5106	94.9377		Q1/2007	39172	14233226	2.13559e+06	2.1454e+06	2.94678e+06	1.96005e+06	1.27509e+06	4386.48	1.44413e+06
Q2/2007	2007-06-30	97.1946	95.2795	94.4018	94.0957	90.5426	97.3074	97.0347	95.452		Q2/2007	39263	14422313	2.15192e+06	2.17661e+06	2.98631e+06	1.9744e+06	1.29488e+06	4415.5	1.46373e+06
Q3/2007	2007-09-30	97.5317	95.713	94.9043	94.5117	91.4088	97.6547	97.3719	95.8988		Q3/2007	39355	14569675	2.18002e+06	2.19501e+06	3.02488e+06	1.99256e+06	1.3049e+06	4410.84	1.48251e+06
Q4/2007	2007-12-31	97.9563	96.4856	95.5813	95.0675	92.6685	98.1745	97.8094	96.5546		Q4/2007	39447	14685330	2.2159e+06	2.21662e+06	3.05107e+06	2.01703e+06	1.31368e+06	4453.06	1.50549e+06
Q1/2008	2008-03-31	98.5161	98.1084	96.5077	95.8123	94.2912	98.8789	98.3927	97.5022		Q1/2008	39538	14668445	2.26119e+06	2.24754e+06	3.10197e+06	2.07513e+06	1.32389e+06	4493.17	1527202
Q2/2008	2008-06-30	98.9954	99.271	97.3406	96.6135	95.836	99.4659	98.8976	98.3503		Q2/2008	39629	14812974	2.27105e+06	2.25672e+06	3.11937e+06	2.08838e+06	1.33637e+06	4493.4	1.54134e+06
Q3/2008	2008-09-30	99.6737	100.4	98.3967	97.751	97.5129	100.114	99.6217	99.3747		Q3/2008	39721	14842983	2.25905e+06	2.27326e+06	3.14468e+06	2.09521e+06	1.35631e+06	4468.4	1.54563e+06
Q4/2008	2008-12-31	99.815	100.603	98.9178	98.5037	98.6021	100.034	99.7577	99.8311		Q4/2008	39813	14549949	2.21446e+06	2.25369e+06	3.10763e+06	2.07057e+06	1.33954e+06	4373.01	1.53709e+06
Q1/2009	2009-03-31	100.062	100.111	99.5963	99.4975	99.7338	100.086	100.032	100.375		Q1/2009	39903	14383885	2.167e+06	2.23176e+06	2.99818e+06	2.03669e+06	1.30962e+06	4170.66	1.52075e+06
Q2/2009	2009-06-30	99.895	99.5678	99.7765	99.8561	100.055	99.877	99.8924	100.164		Q2/2009	39994	14340417	2.15115e+06	2.23275e+06	3.01119e+06	2.02701e+06	1.29246e+06	4252.7	1.50286e+06
Q3/2009	2009-09-30	99.8732	99.8838	100.049	100.132	100.113	99.8479	99.886	99.8598		Q3/2009	40086	14384145	2.16105e+06	2.24245e+06	3.03752e+06	2.03976e+06	1.29793e+06	4253.57	1.49363e+06
Q4/2009	2009-12-31	100.17	100.438	100.578	100.515	100.098	100.189	100.19	99.601		Q4/2009	40178	14566511	2.18055e+06	2.26967e+06	3.07707e+06	2.04748e+06	1.31775e+06	4327.34	1.48883e+06
Q1/2010	2010-03-31	100.522	101.556	101.122	100.737	99.7523	100.57	100.521	99.1288		Q1/2010	40268	14681063	2.21478e+06	2.29142e+06	3.10653e+06	2.04899e+06	1.33853e+06	4380.21	1.48624e+06
Q2/2010	2010-06-30	100.968	102.545	101.765	101.201	99.8026	100.99	100.966	98.9638		Q2/2010	40359	14888600	2.25556e+06	2.31834e+06	3.18475e+06	2.06128e+06	1.35102e+06	4454.15	1.48647e+06
Q3/2010	2010-09-30	101.43	103.169	102.446	101.818	100.189	101.409	101.439	99.0142		Q3/2010	40451	15057660	2.2824e+06	2.34819e+06	3.23019e+06	2.0802e+06	1.36632e+06	4556.36	1.48794e+06
Q4/2010	2010-12-31	101.95	103.751	103.226	102.655	100.953	101.921	101.972	99.3302		Q4/2010	40543	15230208	2.29827e+06	2.38214e+06	3.28396e+06	2.1095e+06	1.38874e+06	4546.43	1.49267e+06
Q1/2011	2011-03-31	102.4	103.677	103.965	103.589	101.98	102.37	102.437	99.7902		Q1/2011	40633	15238371	2.31385e+06	2.4243e+06	3.37238e+06	2.13757e+06	1.40517e+06	4498.47	1.49418e+06
Q2/2011	2011-06-30	103.145	103.98	104.744	104.635	103.21	102.967	103.224	100.587		Q2/2011	40724	15460926	2.32402e+06	2.44402e+06	3.41239e+06	2.16474e+06	1.41605e+06	4509.08	1.4989e+06
Q3/2011	2011-09-30	103.768	104.191	105.121	105.347	104.205	103.278	103.874	101.324		Q3/2011	40816	15587125	2.33503e+06	2.45801e+06	3.45189e+06	2.17281e+06	1.44004e+06	4647.86	1.50373e+06
Q4/2011	2011-12-31	103.918	104.421	104.737	105.357	104.592	103.062	104.033	101.615		Q4/2011	40908	15785312	2.34405e+06	2.45528e+06	3.4529e+06	2.16125e+06	1.44838e+06	4648.12	1.4991e+06
Q1/2012	2012-03-31	104.466	105.158	104.516	105.583	105.283	103.066	104.598	102.377		Q1/2012	40999	15973881	2.3759e+06	2.4517e+06	3.47122e+06	2.15641e+06	1.4489e+06	4728.9	1.49725e+06
Q2/2012	2012-06-30	104.944	105.861	104.766	106.015	105.986	103.3	105.242	103.167		Q2/2012	41090	16121851	2.39048e+06	2.45574e+06	3.48878e+06	2.15092e+06	1.45698e+06	4726.36	1.49443e+06
Q3/2012	2012-09-30	105.508	106.861	105.672	106.811	106.876	103.963	106.102	104.116		Q3/2012	41182	16227939	2.44181e+06	2.4806e+06	3.52305e+06	2.15921e+06	1.46923e+06	4746.11	1.49705e+06
Q4/2012	2012-12-31	105.936	107.537	107.034	107.76	107.705	104.831	106.962	105.071		Q4/2012	41274	16297349	2.45162e+06	2.51118e+06	3.53835e+06	2.16382e+06	1.48329e+06	4794.99	1.49601e+06
Q1/2013	2013-03-31	106.349	108.248	109.006	108.99	108.583	106.021	107.961	106.094		Q1/2013	41364	16475440	2.48378e+06	2.55662e+06	3.57084e+06	2.15908e+06	1.5156e+06	4897.81	1.5054e+06
Q2/2013	2013-06-30	106.571	108.972	110.25	109.865	109.033	106.79	108.382	106.762		Q2/2013	41455	16541390	2.51411e+06	2.60343e+06	3.63142e+06	2.16822e+06	1.53649e+06	4958.68	1.5136e+06
Q3/2013	2013-09-30	107.084	109.752	111.296	110.892	109.568	107.673	108.721	107.569		Q3/2013	41547	16749349	2.55481e+06	2.62794e+06	3.6839e+06	2.18619e+06	1.56188e+06	5012.23	1.52401e+06
Q4/2013	2013-12-31	107.636	110.366	111.828	111.804	109.896	108.364	108.717	108.197		Q4/2013	41639	16999888	2.58113e+06	2.6515e+06	3.7294e+06	2.1901e+06	1.58775e+06	5010.43	1.53728e+06
Q1/2014	2014-03-31	108.084	110.425	111.642	112.428	109.849	108.808	108.214	108.582		Q1/2014	41729	17031324	2.60416e+06	2.64908e+06	3.7832e+06	2.18994e+06	1.59623e+06	5035.83	1.54885e+06
Q2/2014	2014-06-30	108.692	110.638	111.78	113.136	110.039	109.063	108.226	109.024		Q2/2014	41820	17320921	2.63088e+06	2.65894e+06	3.80062e+06	2.19216e+06	1619166	4944.07	1.56117e+06
Q3/2014	2014-09-30	109.188	110.908	111.924	113.636	110.122	108.956	108.561	109.229		Q3/2014	41912	17622257	2.65579e+06	2.67426e+06	3.8296e+06	2.19907e+06	1.62935e+06	4957.39	1.57475e+06
Q4/2014	2014-12-31	109.345	110.826	111.786	113.668	109.863	108.2	108.936	108.963		Q4/2014	42004	17735933	2.6715e+06	2.67389e+06	3.86476e+06	2.19395e+06	1.62539e+06	5005.57	1.58269e+06
Q1/2015	2015-03-31	109.326	110.505	111.604	113.388	109.467	106.975	109.508	108.428		Q1/2015	42094	17874715	2.67559e+06	2.68077e+06	3.85955e+06	2.19102e+06	1.60378e+06	5107.24	1.59149e+06
Q2/2015	2015-06-30	109.917	111.252	112.125	113.857	110.075	106.632	110.708	108.684		Q2/2015	42185	18093224	2.70899e+06	2.69269e+06	3.89278e+06	2.21235e+06	1.59632e+06	5159.54	1.60878e+06
Q3/2015	2015-09-30	110.287	111.617	112.428	114.169	110.826	106.328	111.69	108.817		Q3/2015	42277	18227689	2.72963e+06	2.71023e+06	3.91603e+06	2.23239e+06	1.60077e+06	5209.8	1625875
Q4/2015	2015-12-31	110.513	111.991	112.594	114.374	111.816	106.064	112.525	108.921		Q4/2015	42369	18287226	2.75913e+06	2.72101e+06	3.93967e+06	2.25879e+06	1.59845e+06	5232.51	1.64236e+06
Q1/2016	2016-03-31	110.583	112.387	112.632	114.478	113.043	105.905	113.187	109.027		Q1/2016	42460	18325187	2.77787e+06	2.73979e+06	3.96819e+06	2.28883e+06	1605897	5307.95	1.65628e+06
Q2/2016	2016-06-30	111.25	113.046	113.353	115.215	114.52	106.422	114.181	109.706		Q2/2016	42551	18538039	2.79853e+06	2.75103e+06	4.01231e+06	2.321e+06	1.6095e+06	5366.23	1.67971e+06
Q3/2016	2016-09-30	111.629	113.015	113.734	115.604	115.238	106.838	114.545	110.076		Q3/2016	42643	18729130	2.81098e+06	2.76575e+06	4.03934e+06	2.34092e+06	1.63279e+06	5393.51	1.69741e+06
Q4/2016	2016-12-31	112.19	113.34	114.321	116.143	115.68	107.568	114.753	110.607		Q4/2016	42735	18905545	2.83995e+06	2.79693e+06	4.07506e+06	2.36125e+06	1.65307e+06	5416.74	1.71723e+06
Q1/2017	2017-03-31	112.746	113.344	114.887	116.662	115.685	108.369	114.639	111.157		Q1/2017	42825	19057705	2.85119e+06	2.83247e+06	4.13008e+06	2.37333e+06	1.68183e+06	5447.84	1.73934e+06
Q2/2017	2017-06-30	113.029	113.03	115.173	116.85	115.526	108.805	114.369	111.395		Q2/2017	42916	19250009	2.84934e+06	2.85821e+06	4.16293e+06	2.37939e+06	1.7075e+06	5463.7	1.75814e+06
Q3/2017	2017-09-30	113.615	112.943	115.759	117.401	115.827	109.452	114.605	111.967		Q3/2017	43008	19500602	2.85714e+06	2.89236e+06	4.21333e+06	2.39377e+06	1.72471e+06	5502.09	1.77947e+06
Q4/2017	2017-12-31	114.275	113.678	116.435	118.093	116.354	110.208	115.107	112.598		Q4/2017	43100	19754102	2.88597e+06	2.92894e+06	4.26391e+06	2.41312e+06	1.74399e+06	5540.31	1.8016e+06
	2018-03-31	114.9	114.638	116.955	118.67	116.937	110.734	115.687	113.17		Q1/2018	43190	19960097	2.91717e+06	2.94668e+06	4.29746e+06	2.43205e+06	1.75817e+06	5559.87	1.82335e+06

## Sheet: DataTransformed
	Real GDP Growth (log-first differences, annualized, units)										GDP Deflator Index (log-first differences, annualized, units)										NOTE: This is the transformed data used to estimate the model.
	United States: Gross Domestic Product (SAAR, Bil.2010.US$, PPP)	United Kingdom: Gross Domestic Product (SAAR, Bil.2010.US$, PPP)	France: Gross Domestic Product (SAAR, Bil.2010.US$, PPP)	Germany: Gross Domestic Product (SAAR, Bil.2010.US$, PPP)	Italy: Gross Domestic Product (SAAR, Bil.2010.US$, PPP)	Canada: Gross Domestic Product (SAAR, Bil.2010.US$, PPP)	Japan: Gross Domestic Product (SAAR, Bil.2010US$, PPP)	Spain: Gross Domestic Product (SAAR, Bil.2010.US$, PPP)			United States: Gross Domestic Product Implicit Deflator	United Kingdom: Gross Domestic Product Implicit Deflator	France: Gross Domestic Product Implicit Deflator	Germany: Gross Domestic Product Implicit Deflator	Italy: Gross Domestic Product Implicit Deflator	Canada: Gross Domestic Product Implicit Deflator	Japan: Gross Domestic Product Implicit Deflator	Spain: Gross Domestic Product Implicit Deflator			I report it in units, but multiplied by 4 in order to get the annualized log-first difference in units.
Q1/1960	#N/A	#N/A	#N/A	#N/A	#N/A	#N/A	#N/A	#N/A		Q1/1960	#N/A	#N/A	#N/A	#N/A	#N/A	#N/A	#N/A	#N/A			The code mechanically transforms the series in percentages when it is reported in levels (option 1), so naturally I do not need to express the growth rates in percentages as an input for the code.
Q2/1960	-0.0152087	-0.028779	0.0150003	0.0705602	0.0582775	-0.0776799	0.00735143	0.0814008		Q2/1960	0.0104206	0.0164514	0.0150473	0.00420207	0.0090034	0.00567785	0.00949779	0.0142738			Hence, I note that the volatility estimated is the instantaneous standard deviation of the annualized log-first difference expressed in percentages.
Q3/1960	0.00994789	0.0602199	0.0298309	0.135931	0.0583182	0.0605909	0.135102	0.110358		Q3/1960	0.0144113	0.0116268	0.0157908	-0.00398964	0.0160626	0.0114086	0.0126195	0.0189771
Q4/1960	-0.0487163	0.0243516	0.04713	0.0406752	0.00306898	0.0132116	0.150854	0.0797211		Q4/1960	0.0122954	0.01637	0.0127526	-0.0089732	0.0109898	0.0122184	0.0103268	0.0147579
Q1/1961	0.0271057	0.0646397	0.0638231	0.0402658	0.140804	-0.0162189	0.119746	0.112729		Q1/1961	0.00885368	0.00758006	0.00921716	-0.0211708	0.00998779	0.00253268	0.00588696	0.00805715
Q2/1961	0.0736719	0.0160723	0.0635064	-0.0216318	0.0837371	0.09935	0.0844083	0.173813		Q2/1961	0.00957353	0.00182941	0.00684065	-0.0105427	0.00966539	0.0075437	0.00876654	0.00834882
Q3/1961	0.066146	-0.0209663	0.063187	0.0812693	0.0921559	0.0954718	0.0759845	0.0808758		Q3/1961	0.0105972	0.0248767	0.0106468	5.3635e-05	0.00910925	0.00951387	0.0114666	0.00717967
Q4/1961	0.0802584	-0.00639516	0.06739	0.0181828	0.0758029	0.0556066	0.17944	0.111305		Q4/1961	0.0129473	0.00441689	0.0126946	0.0109888	0.0120445	0.0118088	0.0150681	0.0125507
Q1/1962	0.071404	0.0188274	0.0713707	0.0585042	0.0587636	0.104536	0.0533796	0.0935219		Q1/1962	0.0207278	0.0182536	0.022548	0.0274533	0.0216568	0.0178939	0.0248143	0.0201291
Q2/1962	0.0428687	0.0370075	0.0641107	0.041478	0.0428354	0.0289651	0.0554997	0.0919813		Q2/1962	0.00658443	0.0113149	0.0060334	0.0113569	0.00792637	0.00638873	0.00961844	0.00802312
Q3/1962	0.0379227	0.0242288	0.0571808	0.094679	0.023943	0.052148	0.0485999	0.0967802		Q3/1962	0.00824352	0.00829195	0.00702169	0.0108801	0.00725734	0.0100169	0.00927678	0.00865417
Q4/1962	0.0154921	-0.0144491	0.049761	-0.00865629	0.059617	0.0805021	0.082721	0.0107162		Q4/1962	0.00778087	0.0116493	0.00672177	0.00822644	0.0068957	0.0095015	0.00702533	0.00914427
Q1/1963	0.0442643	0.0205712	-0.0671932	-0.142427	0.0264654	0.0239209	0.0543036	0.223742		Q1/1963	0.0175392	0.0098847	0.0167766	0.0159823	0.018334	0.019883	0.0146909	0.0164913
Q2/1963	0.0518073	0.167975	0.174746	0.175471	0.10818	0.0582198	0.116016	0.00331419		Q2/1963	0.00658127	0.00998661	0.00897559	0.00551157	0.0062041	0.00881147	0.004217	0.00741371
Q3/1963	0.0773312	0.0202966	0.129822	0.136417	0.0651192	0.0306231	0.115601	0.0853915		Q3/1963	0.0049089	0.00673181	0.00481265	0.00432442	0.003682	0.00652403	0.00378431	0.00509722
Q4/1963	0.028446	0.0878555	0.0124322	0.019312	0.0409264	0.123704	0.135494	0.0737808		Q4/1963	0.0323645	0.032084	0.0299012	0.032161	0.0333765	0.0310293	0.0323428	0.0304315
Q1/1964	0.0855915	0.0239948	0.0746041	0.0546611	0.0588562	0.0979341	0.125614	0.0225556		Q1/1964	0.0128094	0.00753753	0.0144518	0.0132094	0.0139996	0.00875714	0.0136278	0.0121324
Q2/1964	0.047286	0.0684643	0.0381741	0.0485749	-0.0406813	0.0137474	0.0953438	0.0653834		Q2/1964	0.00957099	0.0139958	0.00957925	0.00985417	0.0102571	0.010227	0.0102631	0.00860422
Q3/1964	0.0539661	0.0157448	0.0487519	0.0413493	-0.00676189	0.0418388	0.0613259	0.0299394		Q3/1964	0.0162181	0.0188411	0.0174402	0.0164521	0.0158494	0.0170812	0.0175919	0.018337
Q4/1964	0.0141595	0.0604031	0.0359872	0.0540466	-0.0167744	0.0210525	0.0497039	0.0860345		Q4/1964	0.0181401	0.0174406	0.019505	0.0182509	0.0190729	0.0191763	0.0194755	0.0207178
Q1/1965	0.0974558	-0.0111726	0.00886997	0.0649327	0.0536445	0.123719	0.0323687	0.0842334		Q1/1965	0.0200636	0.0225857	0.0208647	0.0201381	0.0203015	0.0208082	0.0212137	0.0170325
Q2/1965	0.0543138	0.00425245	0.0983058	0.06263	0.0789685	0.0373487	0.0496505	0.0170284		Q2/1965	0.0179992	0.013689	0.0160887	0.0181011	0.0159097	0.0210927	0.0191997	0.018271
Q3/1965	0.0804267	0.033103	0.0573872	0.0265467	0.0529306	0.0536748	0.0896251	0.0405155		Q3/1965	0.0157094	0.0170508	0.0157907	0.0158724	0.016261	0.0172801	0.015848	0.0167856
Q4/1965	0.0932388	0.024694	0.0553045	0.0238667	0.0596469	0.0971765	0.0617031	0.117823		Q4/1965	0.0271415	0.0264677	0.0263657	0.027348	0.027631	0.0277051	0.0275574	0.0269148
Q1/1966	0.0975754	0.00658863	0.0359264	0.0719852	0.0384988	0.0757685	0.105636	-0.0273138		Q1/1966	0.0258349	0.0263686	0.0261308	0.026133	0.0266279	0.0266912	0.0241685	0.0247642
Q2/1966	0.0163457	0.0231678	0.0600479	0.0122805	0.0565697	0.0833633	0.153523	0.201538		Q2/1966	0.0326427	0.0322272	0.0332811	0.0327145	0.0326164	0.0323996	0.0314192	0.0345206
Q3/1966	0.0283931	0.0131714	0.0453589	0.00490405	0.111434	-0.00153479	0.0961025	0.0785709		Q3/1966	0.038662	0.0403099	0.0380135	0.0385619	0.0378639	0.0381465	0.0380485	0.035539
Q4/1966	0.0341478	-0.0167665	0.0217784	-0.0629544	0.0191219	0.0479702	0.0791464	0.0108212		Q4/1966	0.0338194	0.0366555	0.0341166	0.0334825	0.0322523	0.0318597	0.0335724	0.0332157
Q1/1967	0.0365551	0.0540966	0.0679649	-0.0199589	0.0790172	-0.00928826	0.104609	0.0110045		Q1/1967	0.0166645	0.0137159	0.0173284	0.0162328	0.018066	0.0173131	0.0160398	0.0185924
Q2/1967	0.00350711	0.05575	0.0435452	-0.0125228	0.0851224	0.0830532	0.106207	0.0477706		Q2/1967	0.0201191	0.0237684	0.0199319	0.0202779	0.0212195	0.0201928	0.0202248	0.0212769
Q3/1967	0.0343826	0.0175577	0.0380659	0.0954361	0.061172	0.0133021	0.136334	0.0680277		Q3/1967	0.0380709	0.0349303	0.0387493	0.0387415	0.0371313	0.0360716	0.0381511	0.0358431
Q4/1967	0.032069	0.0212452	0.0388003	0.0511093	0.0782674	0.0151067	0.0765962	-0.028868		Q4/1967	0.0437676	0.0445937	0.0411401	0.0451556	0.0430909	0.0436955	0.0438689	0.0492561
Q1/1968	0.0804147	0.142845	0.114724	0.0465404	0.00971329	0.0323294	0.0943198	0.0844598		Q1/1968	0.0441384	0.0441763	0.0427456	0.0461211	0.0458922	0.044641	0.0449463	0.0442691
Q2/1968	0.0669839	-0.0173543	-0.315348	0.030971	0.082921	0.10718	0.134185	0.119556		Q2/1968	0.0419828	0.0446464	0.0475488	0.043271	0.0423444	0.0400041	0.0423817	0.0416278
Q3/1968	0.0287072	0.0788135	0.430868	0.0868579	0.0950394	0.0536503	0.0895625	0.0321226		Q3/1968	0.0392798	0.0371104	0.0355445	0.0397182	0.038509	0.0386165	0.0389765	0.0358441
Q4/1968	0.0177639	0.0159857	0.0407751	0.0599262	0.0925587	0.0547587	0.221637	0.158936		Q4/1968	0.0562344	0.0549867	0.0569544	0.0558731	0.0539916	0.0549733	0.0555265	0.0539844
Q1/1969	0.0617177	-0.00891219	0.00734307	0.0994121	0.0621608	0.0514993	0.0350338	0.139461		Q1/1969	0.0412212	0.040587	0.0450461	0.0399928	0.0409713	0.0416499	0.0407732	0.0429785
Q2/1969	0.0128084	0.0291254	0.0969373	0.0509971	0.0715856	0.0191693	0.114789	-0.0135373		Q2/1969	0.0507455	0.0470847	0.0467743	0.0495851	0.0512088	0.0518275	0.0499563	0.0489985
Q3/1969	0.024958	0.0224996	0.0376377	0.0850204	0.00955496	0.0419715	0.0946963	0.0739307		Q3/1969	0.0559109	0.0605363	0.0546338	0.054705	0.058337	0.0563331	0.0557669	0.0608129
Q4/1969	-0.0174992	0.0204142	0.0314858	0.0610022	-0.0816819	0.0559388	0.153148	0.0445304		Q4/1969	0.0511744	0.063901	0.0507514	0.050038	0.0512608	0.0536239	0.0511179	0.0501844
Q1/1970	-0.00709524	-0.0256327	0.0757335	-0.0643412	0.232942	0.0251816	0.120726	0.0740961		Q1/1970	0.0559415	0.0785157	0.0554026	0.0547982	0.0530928	0.0607178	0.0567942	0.0591352
Q2/1970	0.00707177	0.0932243	0.0501657	0.155953	0.0290934	-0.00164765	0.0482316	0.00634952		Q2/1970	0.0553959	0.0661448	0.0571276	0.0545531	0.0602622	0.0578022	0.0570811	0.0540782
Q3/1970	0.035278	0.0394612	0.0547136	0.0740243	0.0794591	0.0406007	0.105798	0.0203912		Q3/1970	0.0327353	0.0437834	0.0368555	0.0323806	0.0321257	0.0360327	0.035803	0.0324563
Q4/1970	-0.0413568	0.0348047	0.0623194	0.0337614	0.00447034	0.0067409	-0.0128938	0.0314373		Q4/1970	0.05237	0.0581093	0.0563388	0.0522304	0.0482795	0.0530046	0.0563517	0.0510319
Q1/1971	0.105695	-0.0236844	0.00516	-0.0775918	-0.0209765	-0.0240371	0.0362873	0.0311154		Q1/1971	0.0606616	0.0596972	0.0713896	0.0612712	0.0566321	0.0632546	0.0667989	0.0617346
Q2/1971	0.0227626	0.0708125	0.0722235	0.0830769	0.0168442	0.115279	0.0639911	0.0772725		Q2/1971	0.0522642	0.0503723	0.0550762	0.0524929	0.0484191	0.0527699	0.0567189	0.0494242
Q3/1971	0.0311513	0.0689969	0.064698	0.0686097	0.0581661	0.10875	0.0484594	0.0729272		Q3/1971	0.0405121	0.0400433	0.0441554	0.040713	0.0403282	0.0394096	0.0424854	0.0397882
Q4/1971	0.0116657	0.0157945	0.0341252	-0.00336869	0.0225179	0.0451701	0.0362615	0.0797422		Q4/1971	0.0330612	0.0388582	0.033604	0.0330984	0.0381421	0.0339934	0.0334432	0.0335796
Q1/1972	0.0711344	0.00419706	0.0520517	0.00404205	0.0439501	-0.0156132	0.128242	0.0643796		Q1/1972	0.0614381	0.0623961	0.0599933	0.0614455	0.0700828	0.0610953	0.0600081	0.0630761
Q2/1972	0.0915723	0.105658	0.0153376	0.0647924	-0.00181275	0.112152	0.0745866	0.0934141		Q2/1972	0.0244615	0.0306381	0.0273564	0.024527	0.0285241	0.0233388	0.0224147	0.0238437
Q3/1972	0.036695	0.0108589	0.0353617	0.0923498	0.0535665	0.00909405	0.0844819	0.0869241		Q3/1972	0.037302	0.0416473	0.0432561	0.0375325	0.0370996	0.0366362	0.034712	0.036546
Q4/1972	0.0658792	0.0620946	0.0658642	0.0616779	0.0189651	0.0945624	0.0993804	0.0784662		Q4/1972	0.0504673	0.0630209	0.0554552	0.0507954	0.0511768	0.0490069	0.0481377	0.048963
Q1/1973	0.0972804	0.193463	0.0789078	0.0549301	0.0358983	0.104097	0.131605	0.0729568		Q1/1973	0.0462288	0.046407	0.055382	0.046781	0.051411	0.0447196	0.0429255	0.0442855
Q2/1973	0.0450952	0.00569991	0.0429835	0.0294465	0.118106	0.0434192	0.0364146	0.0706832		Q2/1973	0.0604474	0.0503514	0.0723145	0.0606835	0.0619849	0.0605982	0.0578089	0.0611978
Q3/1973	-0.0217951	-0.0384502	0.0342071	0.0130871	0.125289	0.0135276	0.0116477	0.0655265		Q3/1973	0.0756578	0.0903524	0.0904612	0.0757532	0.0737542	0.0746228	0.0738182	0.0779739
Q4/1973	0.0371238	-0.0170319	0.0508087	0.00994238	0.0965305	0.0746445	0.0491333	0.0652814		Q4/1973	0.0788177	0.0916909	0.0960398	0.0787723	0.0699821	0.0793703	0.0769902	0.0814443
Q1/1974	-0.0333643	-0.110532	0.0381886	0.0336854	0.032309	0.0290235	-0.139856	0.0673626		Q1/1974	0.075292	0.0821862	0.0926757	0.0751046	0.0806966	0.0757967	0.0736337	0.0788526
Q2/1974	0.010502	0.0573072	0.0199757	-0.00307872	0.0380213	0.0440204	0.0287027	0.050227		Q2/1974	0.0940075	0.106647	0.102766	0.0939141	0.0947432	0.0941371	0.09406	0.0925223
Q3/1974	-0.0389168	0.0258415	0.0375612	1.70056e-07	0.00666295	-0.00470464	0.0508485	0.0281283		Q3/1974	0.11427	0.116464	0.11314	0.114323	0.114445	0.117239	0.116731	0.108831
Q4/1974	-0.016031	-0.0584966	-0.0608681	-0.0508299	-0.0845013	-0.0187283	-0.0217411	0.00264573		Q4/1974	0.116107	0.116926	0.107387	0.116318	0.110586	0.116907	0.120094	0.115422
Q1/1975	-0.0486202	0.00196645	-0.0180368	-0.0231471	-0.0701966	-0.0271565	0.00523994	-0.0201272		Q1/1975	0.0897035	0.0914148	0.0714514	0.0900518	0.0839236	0.0936305	0.0961395	0.0918006
Q2/1975	0.0307001	-0.0659439	0.0100973	-0.0201287	-0.0020649	0.0519757	0.087832	-0.00332405		Q2/1975	0.0594013	0.0650705	0.0465936	0.0595427	0.0555812	0.063034	0.0637113	0.0627432
Q3/1975	0.0655642	-0.0135187	0.0154642	0.0432774	0.0564567	0.0739922	0.0452529	0.0174358		Q3/1975	0.0706141	0.0718187	0.063766	0.0704763	0.0671301	0.0724007	0.0735161	0.0708343
Q4/1975	0.0535666	0.0449199	0.053652	0.0778399	0.0445641	0.0458829	0.0418567	0.0280151		Q4/1975	0.06612	0.0710075	0.0646325	0.0658017	0.0618454	0.0638057	0.0669415	0.063675
Q1/1976	0.0893217	0.0637427	0.0582825	0.0357796	0.0698597	0.0689313	0.033738	0.0395575		Q1/1976	0.0413547	0.0465887	0.0464886	0.0407906	0.0412043	0.0381396	0.039892	0.0402379
Q2/1976	0.0301096	-0.00708854	0.0474084	0.0589836	0.0716524	0.0855342	0.0235653	0.0459051		Q2/1976	0.0403752	0.043282	0.0467848	0.0400945	0.0531916	0.0403857	0.0392799	0.0397945
Q3/1976	0.0202866	0.0494576	0.018872	0.00119458	0.100388	0.0173815	0.055847	0.0386094		Q3/1976	0.0513503	0.0510825	0.0570851	0.0512909	0.0556192	0.0476275	0.0512972	0.0512468
Q4/1976	0.0299112	0.0835127	0.0495258	0.0733859	0.0687918	0.00844336	0.00474849	0.0305984		Q4/1976	0.0702018	0.072151	0.0734585	0.070374	0.0763093	0.0702887	0.0708663	0.0693465
Q1/1977	0.0462721	0.00198819	0.0439753	0.0340127	0.00158406	0.0548928	0.0865589	0.0315646		Q1/1977	0.0638783	0.064473	0.0669263	0.0643081	0.0700523	0.0659106	0.0645744	0.0629822
Q2/1977	0.0777453	-0.0291221	0.0173542	0.0226139	-0.0223368	0.0226629	0.0280427	0.0181042		Q2/1977	0.0557703	0.0590935	0.060766	0.056218	0.0588043	0.0579806	0.0567115	0.0570577
Q3/1977	0.0701465	0.0276213	0.0182958	-0.00115637	-0.03759	0.0192047	0.0271848	0.0132699		Q3/1977	0.0488747	0.0491399	0.0543389	0.0492944	0.047043	0.0517622	0.0497132	0.0514524
Q4/1977	0.000420264	0.0687475	0.0091197	0.0682401	0.0341281	0.06321	0.0538984	0.0266333		Q4/1977	0.0859553	0.0861738	0.0907531	0.0863645	0.0788897	0.0856183	0.0874818	0.0851752
Q1/1978	0.0138937	0.0343631	0.0551831	0.0164508	0.0648433	0.0340723	0.0748508	0.0248925		Q1/1978	0.0591598	0.067336	0.0642469	0.0595694	0.0538345	0.0611291	0.06049	0.0607524
Q2/1978	0.152574	0.0480796	0.0659579	0.0158239	0.0685988	0.0365389	0.0386921	0.00809585		Q2/1978	0.072555	0.0756929	0.077201	0.0726512	0.0680015	0.0746591	0.0733455	0.072948
Q3/1978	0.0389263	0.0537549	-0.0035199	0.0521127	0.0209935	0.0287209	0.0514078	-0.00491139		Q3/1978	0.066334	0.0652348	0.0714345	0.0661431	0.062865	0.0676335	0.0659996	0.0675272
Q4/1978	0.0532926	0.0363021	0.0339004	0.0464929	0.0604935	0.033854	0.0573095	-0.00592405		Q4/1978	0.0832379	0.0841575	0.0853266	0.0826769	0.081942	0.0836513	0.0827931	0.0824803
Q1/1979	0.00793954	-0.015723	0.0342551	0.00494316	0.0627049	0.0342593	0.0593687	-0.0063809		Q1/1979	0.0708804	0.0754392	0.0726693	0.0700485	0.0759212	0.0714146	0.0692948	0.0701989
Q2/1979	0.00483949	0.173511	0.0380581	0.122321	0.0289786	0.0539121	0.0724296	0.00621313		Q2/1979	0.0955725	0.0928113	0.0946625	0.0951483	0.100899	0.0967724	0.0948616	0.0938733
Q3/1979	0.0286192	-0.0884112	0.0454646	2.94336e-07	0.0686243	0.0257992	0.0303872	0.00960852		Q3/1979	0.0845289	0.0965592	0.0835509	0.0846029	0.0923733	0.0843029	0.0838598	0.0850402
Q4/1979	0.0103419	0.0417732	0.00760105	0.0244449	0.0930647	0.0268086	0.0173604	0.0140361		Q4/1979	0.0790023	0.0808091	0.0773597	0.079509	0.0864947	0.0788284	0.0785783	0.0809711
Q1/1980	0.0129179	-0.0390684	0.044498	0.0319217	-0.00735075	0.0281719	0.0152761	0.0266962		Q1/1980	0.0823503	0.0849658	0.0800031	0.0834046	0.0934617	0.0807197	0.082303	0.0863927
Q2/1980	-0.0819591	-0.079981	-0.0229657	-0.0258354	0.0309221	-0.00131768	-0.0211416	0.0135731		Q2/1980	0.0868408	0.0921113	0.0827538	0.0873798	0.0881667	0.0849197	0.086171	0.0848988
Q3/1980	-0.0060658	-0.00496832	-2.76612e-05	-0.0159004	0.00334567	-0.00542113	0.0886089	-0.0158925		Q3/1980	0.0910247	0.0969171	0.0906643	0.0910074	0.0912157	0.0877878	0.0911623	0.0915424
Q4/1980	0.0734522	-0.0427049	-0.00240765	-0.00531392	0.0339477	0.0554269	0.0841203	0.0231336		Q4/1980	0.109006	0.118554	0.107537	0.108412	0.105877	0.104749	0.109314	0.107087
Q1/1981	0.0819355	-0.00633247	0.0137485	0.0473137	-0.0228851	0.0879313	0.0244473	-0.0227118		Q1/1981	0.0986884	0.107499	0.0979726	0.0975802	0.0978594	0.0928813	0.099177	0.0970952
Q2/1981	-0.029317	0.00969947	0.0196355	-0.00999779	0.00779228	0.0438934	0.0486474	-0.00443118		Q2/1981	0.0743427	0.0803497	0.0730946	0.0736365	0.0754947	0.070604	0.0746504	0.0773716
Q3/1981	0.0456385	0.0432763	0.0319503	0.0105235	0.00185197	-0.0360052	-0.00890407	0.017748		Q3/1981	0.07129	0.0763435	0.0713565	0.0708748	0.0713041	0.0691808	0.0716945	0.0708881
Q4/1981	-0.0469393	0.00459598	0.021674	-0.00315449	0.0323348	-0.0182687	0.0290983	-0.00399563		Q4/1981	0.0742383	0.0817424	0.0755553	0.0741816	0.0750303	0.0717493	0.0746691	0.0740622
Q1/1982	-0.0674771	0.00624205	0.0316341	0.0149588	-0.00158123	-0.0478652	0.0608289	0.0164301		Q1/1982	0.0556101	0.0616109	0.058858	0.0559146	0.0560629	0.059061	0.0562446	0.0551469
Q2/1982	0.0217319	0.044712	0.0277046	-0.0246999	-0.0113831	-0.0463779	0.0273698	0.0151629		Q2/1982	0.0478792	0.0497095	0.0484034	0.0481631	0.0475208	0.0493907	0.0486693	0.0479135
Q3/1982	-0.014432	0.010544	0.00217449	-0.0397328	-0.00214009	-0.0354238	0.01745	0.026838		Q3/1982	0.0571784	0.060617	0.0565062	0.0573869	0.0576528	0.0567202	0.0577642	0.0566237
Q4/1982	0.0039	0.028108	0.0238549	0.00957209	-0.0116477	-0.0370867	0.0552024	0.0140751		Q4/1982	0.0442053	0.0503208	0.0424206	0.0443372	0.0468001	0.0447816	0.0447307	0.0453297
Q1/1983	0.052052	0.0717744	0.0161019	0.0360875	0.0111751	0.0652511	0.00251964	0.0145919		Q1/1983	0.0321667	0.0390543	0.0318487	0.0322621	0.0289303	0.0301845	0.0318859	0.0333491
Q2/1983	0.0902526	0.0339666	0.00044893	0.041891	-0.00481925	0.0787124	0.0299572	0.0246284		Q2/1983	0.0269931	0.0286527	0.027272	0.0270528	0.027108	0.0267371	0.026706	0.0275038
Q3/1983	0.0775603	0.0438008	0.0061214	-0.00834341	0.0738041	0.0450698	0.0594179	0.00587808		Q3/1983	0.0416476	0.0439725	0.0419882	0.0417201	0.040349	0.0432627	0.0416649	0.0405206
Q4/1983	0.0816488	0.034448	0.0187543	0.0549518	0.0877034	0.0505671	0.0331838	0.0257616		Q4/1983	0.0293185	0.0314725	0.0291057	0.0293489	0.032665	0.029127	0.0286877	0.0290249
Q1/1984	0.0786941	0.0274793	0.0267036	0.0525561	-0.00785219	0.0680188	0.0458017	0.0329519		Q1/1984	0.0423732	0.0401886	0.0418786	0.0423223	0.0429413	0.0421328	0.0416259	0.04242
Q2/1984	0.0696438	-0.0350362	0.0116611	-0.0635098	0.0128579	0.0774873	0.0601166	-0.0123505		Q2/1984	0.0335193	0.0376767	0.032864	0.0334477	0.0330986	0.0334687	0.0329376	0.0342414
Q3/1984	0.0391596	0.025943	0.0225229	0.107475	0.0468236	0.0169387	0.0485841	0.0346858		Q3/1984	0.0323057	0.0316857	0.031523	0.0322465	0.0314186	0.0324487	0.0321612	0.0314917
Q4/1984	0.0317787	0.078677	0.00970609	0.0335316	0.000641719	0.0625528	0.0068989	0.00510202		Q4/1984	0.0267318	0.0279511	0.0259091	0.0267014	0.0270072	0.0265383	0.0266328	0.028112
Q1/1985	0.0395688	0.0336042	0.00726415	-0.0218625	0.022804	0.0603026	0.0968496	0.0443922		Q1/1985	0.0457373	0.0290098	0.0457997	0.0456441	0.0449116	0.0444753	0.0465475	0.0451593
Q2/1985	0.0364529	0.0843327	0.026868	0.0398903	0.0524894	0.0128279	0.0801838	-0.00375893		Q2/1985	0.024712	0.0306792	0.0259785	0.0245229	0.0253087	0.0266733	0.0251866	0.0247311
Q3/1985	0.0617495	0.00378696	0.0257109	0.05176	0.031913	0.0503228	0.0520124	0.0412532		Q3/1985	0.0231266	0.0244799	0.0238659	0.022932	0.0229623	0.0225265	0.0234819	0.0229162
Q4/1985	0.0298951	0.00970289	0.0159194	0.0239274	0.0265833	0.0610736	0.0527846	0.045677		Q4/1985	0.0230389	0.0378706	0.0227365	0.0227836	0.0236263	0.0228385	0.0231142	0.0204498
Q1/1986	0.0369035	0.0453135	0.0147222	-0.0229477	0.0248498	-0.000885657	0.0158723	0.0112658		Q1/1986	0.0195014	0.0083643	0.0196122	0.0191798	0.0196191	0.0198369	0.0193763	0.0222165
Q2/1986	0.0183208	0.0291681	0.0429341	0.0457646	0.0257892	0.0229629	-0.0098467	0.0941456		Q2/1986	0.0159852	0.0181406	0.0160422	0.0158076	0.0159116	0.0153244	0.015513	0.0149676
Q3/1986	0.0400612	0.0174278	0.0163377	0.0294211	0.039727	0.00509834	0.023365	-0.0283014		Q3/1986	0.0160774	0.0179905	0.0165552	0.0161087	0.0157398	0.0165411	0.0159579	0.0159376
Q4/1986	0.0206569	0.0699735	0.00961212	0.0396868	0.01639	-0.0289202	0.0314241	0.0254709		Q4/1986	0.0222061	0.0202211	0.0219912	0.0223616	0.0225568	0.0226475	0.0222567	0.0233027
Q1/1987	0.0278718	0.0355281	0.0108247	-0.101674	0.0163515	0.0915802	-0.00286359	0.0810996		Q1/1987	0.028976	0.0261005	0.0276308	0.0292703	0.0287103	0.0280301	0.0291129	0.0256935
Q2/1987	0.0446505	0.0573707	0.0455375	0.0888066	0.0601212	0.0515311	0.0829574	0.0593991		Q2/1987	0.0266891	0.0282874	0.0260174	0.0269136	0.0269921	0.026917	0.0268488	0.027868
Q3/1987	0.0361145	0.0955589	0.0304082	0.0275895	0.011529	0.0608121	0.0792157	0.0817667		Q3/1987	0.0289355	0.0240294	0.0290399	0.0291	0.0285805	0.028523	0.028772	0.0307267
Q4/1987	0.065483	0.0450141	0.060657	0.0634895	0.0428099	0.0516032	0.101697	0.0810037		Q4/1987	0.0330073	0.0306562	0.0327301	0.0331371	0.0335485	0.0331573	0.0330781	0.0341379
Q1/1988	0.0224326	0.0717004	0.0515322	-0.0364444	0.0584394	0.0580844	0.094356	0.0128411		Q1/1988	0.0313153	0.0318985	0.0311176	0.0312909	0.031671	0.0319505	0.0311723	0.0298758
Q2/1988	0.0525052	0.0238658	0.026538	0.0718639	0.0253304	0.0353834	-0.00584245	0.0486304		Q2/1988	0.0384587	0.0328577	0.038552	0.03843	0.0379621	0.0377836	0.0385142	0.0392327
Q3/1988	0.023022	0.0607152	0.0525537	0.0450682	0.0522163	0.000327994	0.0882641	0.0714739		Q3/1988	0.0468588	0.0484977	0.0467604	0.0467605	0.0463556	0.0475043	0.0467208	0.0457863
Q4/1988	0.0526361	0.0343151	0.0391444	0.0468267	0.0474731	0.0280083	0.0419235	-0.00898135		Q4/1988	0.0319264	0.0231009	0.0320611	0.0318065	0.0330659	0.0324806	0.0314584	0.0329385
Q1/1989	0.0401474	0.0173753	0.0537307	0.0415888	0.0247713	0.0453636	0.106492	0.0932303		Q1/1989	0.0436862	0.0476826	0.0433869	0.0434672	0.0468368	0.0420178	0.0431791	0.0433535
Q2/1989	0.031331	0.0260053	0.0319939	0.0160696	0.0172586	0.0153364	-0.0525636	0.0391711		Q2/1989	0.041155	0.034304	0.0411224	0.0410381	0.0395083	0.0422207	0.0404659	0.0408869
Q3/1989	0.029749	0.00373687	0.0468686	0.036364	0.0414816	0.0144109	0.0693726	0.0532314		Q3/1989	0.0288955	0.0367028	0.0290072	0.0289525	0.0256464	0.0294726	0.0283107	0.0290961
Q4/1989	0.00845425	0.00360897	0.0472886	0.0460857	0.0409552	-0.00858026	0.122058	-0.00664571		Q4/1989	0.0277206	0.0215997	0.0273203	0.0279102	0.0229749	0.0275092	0.0271947	0.0275323
Q1/1990	0.0435572	0.0271631	0.0275291	0.0821783	0.015913	0.0373701	-0.0190824	0.0348882		Q1/1990	0.043893	0.044819	0.0429371	0.0442331	0.0413575	0.0432973	0.0436981	0.0435517
Q2/1990	0.0154377	0.0205524	0.018915	0.0196182	0.0121728	-0.016665	0.124211	0.0674141		Q2/1990	0.0410834	0.0458998	0.0404631	0.0412182	0.0302847	0.0412832	0.0410765	0.0401409
Q3/1990	0.000987621	-0.0417354	0.0144968	0.0833627	0.00640864	-0.0288142	0.0665188	-0.0119566		Q3/1990	0.0355593	0.0408255	0.0347395	0.0354972	0.0316442	0.0360877	0.0359045	0.0353076
Q4/1990	-0.0342433	-0.0134229	0.0115232	0.0698042	-0.0260681	-0.0360175	-0.00760791	0.148477		Q4/1990	0.0301466	0.0306287	0.0300386	0.0299147	0.028833	0.0302772	0.0302508	0.0308257
Q1/1991	-0.0188149	-0.0112596	-0.00648378	0.114172	0.0781733	-0.0582965	0.0347009	-0.0776184		Q1/1991	0.0397022	0.0405254	0.039703	0.039253	0.0459026	0.0398039	0.0404404	0.0393097
Q2/1991	0.0309228	-0.00487698	0.0226955	-0.0166491	-0.0219498	0.0182523	0.0471724	0.048476		Q2/1991	0.0272789	0.0297214	0.0278346	0.0271433	0.02388	0.0272526	0.0277536	0.02802
Q3/1991	0.0191546	-0.00915863	0.00753666	-0.0202736	0.00143257	0.00510459	-0.00886632	0.0300974		Q3/1991	0.0292607	0.028892	0.0294677	0.0291624	0.0312298	0.0285615	0.0296859	0.0294599
Q4/1991	0.0174245	0.00636317	0.0215373	0.0514961	0.0466725	0.00720237	0.0280026	0.0198512		Q4/1991	0.0215404	0.0253998	0.0214255	0.0216777	0.0228985	0.0208766	0.0214624	0.0234079
Q1/1992	0.0469728	-0.000320014	0.0356819	0.0635748	0.0107434	0.00262877	0.00124257	0.0397103		Q1/1992	0.0171684	0.0104036	0.0174824	0.0173531	0.0193623	0.0176406	0.0172017	0.0183342
Q2/1992	0.0438651	-0.0048728	0.000379015	-0.0262524	-0.00229046	0.00481293	0.0139758	-0.0525013		Q2/1992	0.0254291	0.0247007	0.0248212	0.0255711	0.0217122	0.0257931	0.0253801	0.0239759
Q3/1992	0.0386965	0.025537	-0.000979166	-0.011945	-0.00889212	0.0214695	0.00471012	0.00255385		Q3/1992	0.0189542	0.00758997	0.0193186	0.019027	0.0202689	0.019455	0.0192116	0.0195238
Q4/1992	0.0398813	0.0279738	-0.00869679	-0.0084821	-0.0276677	0.0225705	-0.0255824	-0.0261491		Q4/1992	0.0269701	0.022292	0.0271131	0.0269635	0.0246947	0.0265502	0.0272041	0.0242982
Q1/1993	0.00745035	0.0291853	-0.0276174	-0.035373	-0.00558252	0.0253805	0.0448226	-0.0374946		Q1/1993	0.0226733	0.0180405	0.0243168	0.0225936	0.024396	0.0226604	0.0227916	0.0229292
Q2/1993	0.0237161	0.0202806	0.00561728	0.00201542	-0.00966182	0.036226	-0.0254072	-0.000271003		Q2/1993	0.0242523	0.0278435	0.0243912	0.0242351	0.0244095	0.0249385	0.0248019	0.0245282
Q3/1993	0.0194588	0.0320616	0.0061498	0.0281089	-0.00631333	0.0380174	-0.0288179	0.0478402		Q3/1993	0.0240127	0.0354906	0.0234555	0.0239963	0.0239574	0.0223666	0.0240612	0.0251026
Q4/1993	0.0530451	0.0271273	0.00903786	-0.00250166	0.0292182	0.0171662	0.0251216	0.0150455		Q4/1993	0.0207872	0.0408416	0.0193783	0.0208555	0.0202653	0.0217185	0.0209802	0.0217398
Q1/1994	0.0390266	0.0483862	0.0262041	0.0486252	0.0303513	0.0584295	0.0329385	0.0329476		Q1/1994	0.0193634	0.0573616	0.0182648	0.0194893	0.0206276	0.0194211	0.019696	0.0183982
Q2/1994	0.0542977	0.046162	0.0453729	0.0138203	0.0288413	0.058192	-0.0209143	0.00876049		Q2/1994	0.0198886	0.00567086	0.0190137	0.0198468	0.0195774	0.018853	0.0197605	0.0204387
Q3/1994	0.023519	0.0451703	0.0227169	0.0299443	0.0248614	0.0507763	0.050498	0.0316344		Q3/1994	0.0215683	-0.0349805	0.0220612	0.021392	0.0203003	0.0225137	0.0217207	0.021185
Q4/1994	0.0451631	0.02271	0.0377032	0.0524725	0.0373827	0.0289186	-0.0183483	0.014941		Q4/1994	0.0219538	-0.0721763	0.0240064	0.0216418	0.0208465	0.0218381	0.0216761	0.0206846
Q1/1995	0.013649	0.01285	0.0190806	-0.0182638	0.0499103	0.0367289	0.0399598	0.0425226		Q1/1995	0.0229031	-0.115008	0.0259226	0.02244	0.0209988	0.0230065	0.0228179	0.0238018
Q2/1995	0.0139516	0.0144039	0.0194154	0.034762	0.00280507	0.00136054	0.0492186	0.0274106		Q2/1995	0.0175343	-0.0642918	0.0165805	0.0177676	0.0190922	0.0176611	0.0173749	0.0168688
Q3/1995	0.0340963	0.0391021	0.00498082	0.0134369	0.0177528	0.00522411	0.044298	0.0189864		Q3/1995	0.0189931	-0.0129525	0.0132438	0.0198379	0.0205017	0.0186273	0.0188179	0.0191192
Q4/1995	0.0282963	0.0112534	0.00185103	-0.00191661	0.0329897	0.0161852	0.00955462	0.0280773		Q4/1995	0.019666	0.0352543	0.0102419	0.0211485	0.0234206	0.019629	0.0196255	0.0213149
Q1/1996	0.0261544	0.0359068	0.0267292	-0.040223	0.0172985	0.00248538	0.0373025	0.0257319		Q1/1996	0.0215898	0.0812774	0.0230122	0.0237275	0.0222677	0.0210913	0.021984	0.0237256
Q2/1996	0.0692373	0.012715	0.00970201	0.056725	-0.0208966	0.027747	0.0451073	0.0253692		Q2/1996	0.0151995	0.0649455	0.0233963	0.0123487	0.0148641	0.0151768	0.0152114	0.0175825
Q3/1996	0.0368305	0.027226	0.0240281	0.0242699	0.00901969	0.0349403	-0.00113952	0.03878		Q3/1996	0.0112611	0.0420122	0.00889056	0.00339909	0.00934126	0.011998	0.0112906	0.0139685
Q4/1996	0.0420412	0.0379057	0.00400229	0.0222367	-0.00239916	0.031686	0.0458112	0.0159811		Q4/1996	0.020241	0.0220596	0.0196855	0.00731786	0.016071	0.0210939	0.0204048	0.0217957
Q1/1997	0.0303717	0.0763725	0.0150077	-0.0241328	0.0107552	0.0524328	0.0138336	0.0452868		Q1/1997	0.0247462	-0.00606315	0.0301495	0.00665606	0.0183425	0.0244704	0.0248963	0.0263509
Q2/1997	0.0598922	0.0351999	0.0461095	0.0560901	0.0539846	0.0447915	-0.0299094	0.0363791		Q2/1997	0.0108328	0.00440627	0.0197665	-0.00271681	0.0153803	0.00997434	0.010401	0.0186249
Q3/1997	0.0506114	0.0195765	0.0288452	0.0154161	0.0240455	0.0475071	0.0129352	0.0402478		Q3/1997	0.014256	0.0183912	0.0247813	0.00528957	0.0282574	0.0143699	0.0147861	0.0275447
Q4/1997	0.0309178	0.041273	0.0426408	0.0283408	0.065213	0.0381548	0.00218713	0.0573583		Q4/1997	0.0132765	-0.016977	0.0232764	0.00888981	0.036311	0.0133559	0.0138744	0.0325287
Q1/1998	0.0393823	0.0302732	0.0354127	0.0319345	-0.0260758	0.0556986	-0.0486487	0.0395498		Q1/1998	0.00651105	-0.00909935	0.0162521	0.0065932	0.0407589	0.00560533	0.00735239	0.0302302
Q2/1998	0.0386074	0.0361064	0.0344303	-0.0128808	0.0154288	0.00173952	-0.0149456	0.0301275		Q2/1998	0.00836399	-0.0130258	0.0128077	0.0118211	0.0292807	0.00898665	0.00814195	0.0228363
Q3/1998	0.0519885	0.0297081	0.0299417	0.0105838	0.00533298	0.036934	0.00623902	0.0476765		Q3/1998	0.0149469	-0.0074867	0.0138469	0.0209441	0.0219173	0.0149429	0.0137329	0.0150833
Q4/1998	0.0651282	0.0387302	0.0294489	-0.000919418	-0.0186249	0.053674	0.0343839	0.0418074		Q4/1998	0.0124521	-0.00211347	0.00598213	0.0215032	0.00853257	0.0153056	0.00971652	0.001422
Q1/1999	0.0318132	0.0225362	0.0234096	0.0319349	0.0235718	0.0718495	-0.0554281	0.0322747		Q1/1999	0.0199447	-0.00579756	0.00825056	0.0318232	0.00028049	0.0239928	0.0165324	-0.00286235
Q2/1999	0.0328533	0.00247993	0.0331092	0.00865446	0.0170776	0.0334524	0.0194316	0.0598585		Q2/1999	0.0134117	4.41605e-05	0.0100039	0.0158222	0.00145225	0.0130373	0.0146729	9.84938e-05
Q3/1999	0.0500265	0.070759	0.0460499	0.0416438	0.0332535	0.0618288	0.0190264	0.0475008		Q3/1999	0.0144402	0.0192282	0.0199478	0.00703491	0.00794966	0.00796595	0.0208423	0.0125534
Q4/1999	0.0688373	0.0546166	0.0501845	0.0496732	0.0562878	0.0564563	-0.000321068	0.0467909		Q4/1999	0.0182695	0.0471511	0.0325862	0.000844381	0.0177887	0.00401242	0.0296348	0.0268434
Q1/2000	0.0115899	0.0336157	0.0417488	0.0374069	0.0462384	0.0633359	0.0771856	0.0632807		Q1/2000	0.0304727	0.0797176	0.054647	0.00295353	0.0339421	0.0111357	0.0475187	0.0494607
Q2/2000	0.0748464	0.0243792	0.0364642	0.0403336	0.0284104	0.0473684	0.00835163	0.0487908		Q2/2000	0.0225751	0.0620924	0.0436472	0.00412144	0.0230754	0.0127648	0.0334413	0.0353058
Q3/2000	0.00480822	0.0112111	0.0267254	-0.00567474	0.0215343	0.0402035	0.00326536	0.0431831		Q3/2000	0.025859	0.0470782	0.0448312	0.0170725	0.0220131	0.0222545	0.0303442	0.0336834
Q4/2000	0.0226715	0.00664944	0.0337988	0.00305693	0.061179	0.00711373	0.0372623	0.0439006		Q4/2000	0.0214351	0.0283555	0.0377431	0.021571	0.0125608	0.0253504	0.0193607	0.0229028
Q1/2001	-0.0113905	0.0524736	0.0200534	0.0648342	0.0145915	0.0207622	0.0235942	0.0397275		Q1/2001	0.0250551	0.00470604	0.0393587	0.0354662	0.0132109	0.036785	0.0160261	0.0207256
Q2/2001	0.0211472	0.0313521	0.0076663	0.00343406	-0.0109111	0.0103111	-0.0192598	0.0316678		Q2/2001	0.0281337	0.0242864	0.0467272	0.0399368	0.0222235	0.0283831	0.0268838	0.0377709
Q3/2001	-0.0126703	0.0296919	0.0128447	-0.0116023	-0.0169926	-0.00302956	-0.0445954	0.0396102		Q3/2001	0.0130846	0.0109019	0.0363819	0.0275139	0.0141564	0.00241444	0.0181343	0.0368388
Q4/2001	0.0110859	0.0177825	7.71973e-05	0.00473088	0.0019699	0.0244474	-0.0106707	0.0282574		Q4/2001	0.0120927	0.0226705	0.0402482	0.0284505	0.0195404	-0.00665186	0.0242378	0.0497464
Q1/2002	0.0366631	0.0189528	0.0118113	-0.012377	-0.00328134	0.059152	0.00472381	0.0226998		Q1/2002	0.0127912	0.0371984	0.0468062	0.0308175	0.0278777	-0.011282	0.0319193	0.0639379
Q2/2002	0.0220084	0.0262938	0.020899	0.0103349	0.0196226	0.0227358	0.0309812	0.029958		Q2/2002	0.0148538	0.0345013	0.0261669	0.0299138	0.024955	0.00832377	0.0271058	0.0478619
Q3/2002	0.0194258	0.0302048	0.0143018	0.0188777	0.0085874	0.0347964	0.0158489	0.024122		Q3/2002	0.0178241	0.0251825	0.00664759	0.0303437	0.0252535	0.0209196	0.0206933	0.0322436
Q4/2002	0.00254547	0.0357112	0.0014833	-0.00856987	0.0154935	0.0220951	0.0105531	0.0299323		Q4/2002	0.0215826	0.0187078	-0.0113585	0.0311287	0.0251517	0.0393281	0.015454	0.0177066
Q1/2003	0.0206663	0.0262075	0.00600387	-0.0487671	-0.0119725	0.0219765	-0.00441177	0.0392775		Q1/2003	0.0245548	-0.00335097	-0.0296653	0.0312383	0.0254011	0.0553963	0.00999494	0.00269437
Q2/2003	0.036946	0.0376871	-0.00865723	0.000868499	-0.0126283	-0.00593922	0.0318639	0.0270737		Q2/2003	0.0128141	-0.00293897	-0.0314671	0.0224432	0.00689839	0.0281529	0.00215853	2.29781e-05
Q3/2003	0.0664364	0.040697	0.0257135	0.0199196	0.00458599	0.0150498	0.0161395	0.0273581		Q3/2003	0.0220996	0.034322	-0.0112618	0.0346464	0.0101538	0.0320483	0.017164	0.018007
Q4/2003	0.0464975	0.0321861	0.0321577	0.01466	0.0318935	0.0273343	0.0441888	0.0408625		Q4/2003	0.0189217	0.0357231	-0.00465473	0.0346752	-0.00362732	0.016551	0.019462	0.0230864
Q1/2004	0.022937	0.0218314	0.0352581	-0.000968799	0.0184414	0.028736	0.0309674	0.0242268		Q1/2004	0.034724	0.068828	0.0215491	0.0535241	0.00574306	0.0225868	0.0404873	0.0473464
Q2/2004	0.0292137	0.0152964	0.0252718	0.0137515	0.0129864	0.0470205	-0.00137835	0.0309162		Q2/2004	0.0346674	0.0527649	0.0261676	0.0392842	0.00747944	0.0323228	0.0366585	0.0406338
Q3/2004	0.0361933	0.00659008	0.0155214	-0.00729989	0.00381474	0.0472737	0.0208435	0.0400914		Q3/2004	0.0245337	0.000381875	0.0226005	0.0146795	-0.00270329	0.0303205	0.0219073	0.0240038
Q4/2004	0.0344257	0.0100715	0.0272241	0.0038665	0.00653562	0.0286137	-0.0106222	0.0245386		Q4/2004	0.0279645	-0.0207633	0.0325012	0.00361202	0.00329853	0.0425322	0.0210321	0.0209281
Q1/2005	0.0424125	0.0377393	0.0105829	-0.00773608	-0.00998014	0.0136176	0.0192048	0.0402599		Q1/2005	0.0368987	-0.0357406	0.0488684	-0.00222876	0.0068037	0.0609381	0.0265502	0.0229647
Q2/2005	0.0208304	0.0441194	0.00788845	0.0265836	0.0386663	0.0283759	0.031172	0.0405644		Q2/2005	0.0289159	0.00152138	0.0414361	0.00219245	0.0190298	0.0471254	0.0217249	0.0384342
Q3/2005	0.0334628	0.046526	0.0195404	0.0323475	0.0265959	0.0489263	0.0379296	0.0377503		Q3/2005	0.0372392	0.0271424	0.0516091	0.0228086	0.0446136	0.0499935	0.0336434	0.0695656
Q4/2005	0.022796	0.0594832	0.0280513	0.015232	0.0112261	0.0394212	0.00846215	0.0416114		Q4/2005	0.0302182	0.0501978	0.0467672	0.0281726	0.0601551	0.0362917	0.0298947	0.0865163
Q1/2006	0.0477692	0.0106384	0.0332863	0.0370933	0.0142512	0.0319329	0.00302103	0.0430843		Q1/2006	0.0313366	0.0702693	0.0501592	0.0420897	0.0718097	0.0276829	0.0347987	0.111977
Q2/2006	0.0119348	0.0089031	0.0390353	0.0635096	0.0234963	0.00192986	0.013894	0.0415568		Q2/2006	0.0320429	0.0565021	0.045367	0.0400773	0.067582	0.0309902	0.0345912	0.0920967
Q3/2006	0.00357592	0.00256487	0.000810357	0.0397483	0.0141733	0.0111006	-0.0068922	0.0392969		Q3/2006	0.0278095	0.0302554	0.0366968	0.0328543	0.0492359	0.0265968	0.0291147	0.0656945
Q4/2006	0.0311867	0.014082	0.0296181	0.0518541	0.0517393	0.0150604	0.0485935	0.0378075		Q4/2006	0.0139606	-0.0149889	0.0183277	0.0161362	0.0255283	0.0127548	0.0136939	0.0297954
Q1/2007	0.00247039	0.0396019	0.0310124	0.016366	0.00643149	0.0257806	0.0293066	0.0407136		Q1/2007	0.0446986	-0.00957468	0.0457137	0.0439237	0.0430048	0.0445579	0.0443461	0.0392028
Q2/2007	0.0304803	0.0287603	0.0317502	0.0295528	-0.00401467	0.0384204	0.00471019	0.0323099		Q2/2007	0.0223094	0.00170989	0.0260167	0.0237538	0.033193	0.0231736	0.0216658	0.0216082
Q3/2007	0.0268134	0.0337346	0.0124337	0.0336783	-0.00146529	0.0165862	-0.0180975	0.0323098		Q3/2007	0.0138497	0.0181595	0.0212344	0.0176447	0.0380864	0.0142491	0.0138738	0.0186798
Q4/2007	0.014251	0.0331448	0.01076	0.0110325	-0.00591875	0.0055986	0.0201728	0.0342755		Q4/2007	0.0173759	0.0321597	0.0284329	0.023456	0.0547489	0.0212356	0.0179326	0.0272607
Q1/2008	-0.0273977	0.0142151	0.0168165	0.0349646	0.0441566	0.00237063	0.0120827	0.0182063		Q1/2008	0.0227959	0.0667135	0.0385794	0.0312153	0.0694363	0.0285962	0.0237851	0.039067
Q2/2008	0.0198058	-0.0297162	-0.0180548	-0.0109363	-0.0395395	0.0138546	-0.0202684	0.00222743		Q2/2008	0.0194135	0.0471256	0.0343754	0.0333087	0.0650028	0.0236762	0.0204731	0.0346413
Q3/2008	-0.0192167	-0.0664234	-0.0139611	-0.0144977	-0.0563239	0.0332283	-0.0514949	-0.0303397		Q3/2008	0.0273119	0.0452256	0.0431654	0.0468203	0.0693848	0.0259953	0.0291779	0.0414468
Q4/2008	-0.0854253	-0.0878175	-0.0557223	-0.078088	-0.0917566	-0.0465321	-0.0917743	-0.0404918		Q4/2008	0.0056663	0.00807609	0.0211273	0.0306808	0.0444293	-0.00322015	0.0054589	0.01833
Q1/2009	-0.0558083	-0.0670611	-0.0664474	-0.183568	-0.111642	-0.0924548	-0.200484	-0.0644866		Q1/2009	0.00989232	-0.019604	0.0273431	0.0401531	0.0456487	0.00210474	0.0109749	0.021733
Q2/2009	-0.00541843	-0.00758964	-0.00545344	0.00293253	-0.0319045	-0.0443818	0.0834963	-0.0389214		Q2/2009	-0.00668785	-0.0217583	0.00722892	0.0143934	0.0128482	-0.00837908	-0.0055772	-0.00840605
Q3/2009	0.0130521	0.00568659	0.00641829	0.0237985	0.0227396	0.0180596	0.00107672	-0.0124639		Q3/2009	-0.000873487	0.0126737	0.0109233	0.0110245	0.002342	-0.00116758	-0.000258501	-0.0121777
Q4/2009	0.038536	0.0138232	0.0271812	0.0364655	0.0157107	0.0469746	0.056628	-0.00251231		Q4/2009	0.0118583	0.0221159	0.0210776	0.0152696	-0.000596919	0.0136277	0.0121497	-0.0103789
Q1/2010	0.0172765	0.017999	0.0165772	0.0292807	0.0168	0.0473724	0.0353649	0.0120566		Q1/2010	0.0140567	0.0442875	0.021566	0.00883402	-0.0138526	0.0152136	0.0132096	-0.0190089
Q2/2010	0.0384559	0.034206	0.0213586	0.0810729	0.021906	0.0205149	0.0492978	0.00727282		Q2/2010	0.0176937	0.0387884	0.0253718	0.0183961	0.0020199	0.0166366	0.0176605	-0.00666349
Q3/2010	0.0269064	0.0230624	0.0244787	0.0323725	0.0210667	0.0284629	0.0720649	0.00193818		Q3/2010	0.0182576	0.0242434	0.0266811	0.0243069	0.0154675	0.0165955	0.0186863	0.00203548
Q4/2010	0.0251255	0.0052072	0.0271111	0.0332972	0.025601	0.0449656	-0.0296914	-5.91664e-05		Q4/2010	0.0204505	0.0225074	0.0303184	0.0327322	0.030365	0.0201371	0.0209644	0.0127465
Q1/2011	-0.0154795	0.0298717	0.0416175	0.0700398	0.0123541	0.0294654	-0.0606372	-0.0144481		Q1/2011	0.0176228	-0.00284568	0.0285502	0.0362329	0.040514	0.0175706	0.0182173	0.0184798
Q2/2011	0.0289929	0.00590251	0.00255307	0.00697616	0.00256011	0.00759086	-0.0211693	-0.0192115		Q2/2011	0.0290043	0.0116515	0.029855	0.0402025	0.047951	0.0232605	0.0305925	0.0318274
Q3/2011	0.00842183	0.0107521	0.00844541	0.0189292	-0.0234502	0.0551342	0.0961321	-0.0162925		Q3/2011	0.0240954	0.00814274	0.014389	0.0271148	0.0383505	0.0120679	0.0251229	0.0291749
Q4/2011	0.04478	0.00663349	0.0102199	0.000770437	-0.036208	0.0314813	-0.00588686	-0.0237954		Q4/2011	0.00575856	0.00879018	-0.014667	0.000391087	0.0148533	-0.00837541	0.00611062	0.011468
Q1/2012	0.0264504	0.0258259	0.00260756	0.012599	-0.0352625	0.00127557	0.0472562	-0.0348661		Q1/2012	0.0210498	0.0281644	-0.00844506	0.00856845	0.0263093	0.000160538	0.0216629	0.0299146
Q2/2012	0.018629	-0.00215399	-0.00297048	0.00383904	-0.0368403	0.013182	-0.0267164	-0.0382405		Q2/2012	0.0182535	0.0266287	0.00955611	0.0163461	0.0266412	0.0090624	0.0245673	0.0307138
Q3/2012	0.00478452	0.0473517	0.00584063	0.00919878	-0.0180605	0.00788074	-0.0158809	-0.0296642		Q3/2012	0.0214508	0.0376161	0.0344482	0.0299055	0.0334538	0.0255981	0.0325608	0.0366545
Q4/2012	0.0008976	-0.00916348	-0.00221284	-0.0180342	-0.0223682	0.00487545	0.00870218	-0.0392731		Q4/2012	0.0161747	0.0252023	0.0512209	0.0353663	0.0308913	0.0332354	0.032283	0.0365033
Q1/2013	0.0278856	0.0257828	-0.00129203	-0.00885525	-0.0412563	0.0410091	0.047692	-0.0137463		Q1/2013	0.0155877	0.0263606	0.0730297	0.0454188	0.0324741	0.0451797	0.0371742	0.0387705
Q2/2013	0.00765642	0.0218743	0.0271728	0.0353035	0.000351467	0.0258476	0.033832	-0.00335383		Q2/2013	0.00832333	0.0266665	0.0453996	0.0319849	0.0165585	0.0289104	0.0155737	0.0250918
Q3/2013	0.0307488	0.0356991	-0.000300239	0.0201972	0.0134272	0.032642	0.0304632	-0.00272903		Q3/2013	0.0192259	0.0285435	0.0377797	0.0371934	0.0195802	0.0329198	0.0125022	0.0301452
Q4/2013	0.0388334	0.0186718	0.0166368	0.0163121	-0.0048031	0.0401152	-0.00126039	0.0113899		Q4/2013	0.020556	0.0223219	0.0190735	0.0327932	0.0119632	0.0255872	-0.000176352	0.0232861
Q1/2014	-0.00921869	0.0333877	0.00301136	0.0350529	0.00140876	0.00497467	0.0387443	0.0157856		Q1/2014	0.0166086	0.00214946	-0.00666962	0.0222361	-0.00171665	0.0163437	-0.0185178	0.0141942
Q2/2014	0.0449955	0.0331537	0.00991468	-0.00676076	-0.00285226	0.0476646	-0.0739985	0.0154286		Q2/2014	0.0224478	0.00768035	0.00494498	0.0251361	0.00691584	0.00939358	0.000440567	0.0162588
Q3/2014	0.0508029	0.0279355	0.0178278	0.0127605	0.00959249	0.0290266	-0.00159217	0.0271199		Q3/2014	0.0181877	0.00975379	0.00514966	0.0176275	0.0029915	-0.00393844	0.0123542	0.00752215
Q4/2014	0.019953	0.0265359	0.00438157	0.0354397	9.52574e-05	0.0181284	0.0248829	0.0298919		Q4/2014	0.00576692	-0.00294163	-0.00492798	0.00111711	-0.00941554	-0.0278696	0.0138047	-0.00976307
Q1/2015	0.0318694	0.0177073	0.0167997	0.00445471	0.00909415	-0.00801586	0.0595136	0.0418646		Q1/2015	-0.000691564	-0.0115988	-0.0065239	-0.00985193	-0.0144378	-0.045513	0.0209178	-0.0196798
Q2/2015	0.0270446	0.0226981	-0.000878169	0.0177676	0.0165887	-0.00579193	-0.00285679	0.0337948		Q2/2015	0.0215568	0.0269346	0.0186285	0.0165209	0.0221529	-0.0128624	0.0436099	0.00943155
Q3/2015	0.0161747	0.0172738	0.01516	0.0129064	0.00888613	0.0225559	0.00345841	0.0373964		Q3/2015	0.0134425	0.0130899	0.0108	0.0109184	0.0271951	-0.0114139	0.0353177	0.00487192
Q4/2015	0.00484528	0.0296165	0.0100015	0.0168994	0.0114314	0.0041548	-0.012398	0.0365341		Q4/2015	0.00819861	0.013378	0.00588706	0.00717249	0.0355855	-0.00996025	0.0297965	0.00381493
Q1/2016	0.00578623	0.0129504	0.0261555	0.025216	0.0092221	0.0245775	0.0337855	0.0298582		Q1/2016	0.00250844	0.0141216	0.00135816	0.0036351	0.0436366	-0.00599285	0.023473	0.00390644
Q2/2016	0.0221316	0.00625153	-0.00916203	0.0185359	0.00386449	-0.0104968	0.00872994	0.0313649		Q2/2016	0.0240617	0.0233871	0.0255387	0.0256938	0.05195	0.0194708	0.0349497	0.0248292
Q3/2016	0.0274226	0.0188261	0.00793045	0.0133944	0.00918897	0.0418319	0.00753602	0.0284406		Q3/2016	0.0135985	-0.00106994	0.0134111	0.0134645	0.0250024	0.0156218	0.012747	0.01347
Q4/2016	0.0174304	0.0295487	0.0242408	0.01659	0.0192874	0.0221401	0.00993389	0.0272091		Q4/2016	0.0200704	0.0114711	0.0205971	0.0186272	0.0152925	0.027234	0.00725722	0.0192315
Q1/2017	0.0122816	0.0156561	0.0307645	0.03583	0.020222	0.0392997	0.0268777	0.0313319		Q1/2017	0.0197833	0.000138883	0.0197406	0.0178072	0.000190827	0.0296868	-0.00397758	0.0198478
Q2/2017	0.0301394	0.00849789	0.026254	0.0252454	0.0157265	0.0445755	0.0210519	0.0344417		Q2/2017	0.0100208	-0.0110898	0.00993548	0.00644577	-0.00552171	0.016034	-0.00942387	0.00855648
Q3/2017	0.0310713	0.0140301	0.0271895	0.0293118	0.0136884	0.0163707	0.0197812	0.027733		Q3/2017	0.0206639	-0.00309964	0.0203219	0.0188321	0.010422	0.0237441	0.00822605	0.0205085
Q4/2017	0.0284706	0.0141957	0.0269778	0.0242055	0.0140495	0.0169474	0.0101948	0.0269726		Q4/2017	0.0231927	0.0259673	0.0232983	0.0235196	0.018144	0.027506	0.0174949	0.0224726

## Sheet: C
Q1/1960 !Q mag=bil	.excel_last	Q111cc@OUTLOOK	Q112cc@OUTLOOK	Q132cc@OUTLOOK		Q136cc@OUTLOOK	Q156cc@OUTLOOK	Q158cc@OUTLOOK	Q184cc@OUTLOOK							GERMANY	Q1/1960 !Q mag=bil	S134NCPC@G10	(Q134cc@OUTLOOK)						Q1/1960 !Q	(Q134CCP@OUTLOOK)	(Q134CCP@OUTLOOK) - historical
.DESC		United States: Private Final Consumption Expenditure, Vol(SAAR,Bil.Chn.2009.US$)	UK: Private Final Consumption Expenditure, Volume(SAAR,Bil.Chn.2015.Pound)	France: Private Final Consumption Expenditure, Volume(SAAR,Bil.Chn.2010.Euro)	Germany: GDP: Private Consumption Expenditure (SA/WDA, Bil.Chn.2010.Euros)	Italy: Private Final Consumption Expenditure, Volume(SAAR,Bil.Chn.2010.Euro)	Canada: Private Final Consumption Expenditure, Volume(SAAR,Bil.Chn.2007.C$)	Japan: Private Final Consumption Expenditure, Volume(SAAR,Bil.Chn.2011.Yen)	Spain: Private Final Consumption Expenditure, Volume(SAAR,Bil.Chn.2010.Euro)								.DESC	Germany: GDP: Private Consumption Expenditure (SWDA, Bil.Chn.2010.Euros)	Germany: Private Final Consumption Expenditure, Volume(SAAR,Bil.Chn.2010.Euro)	Germany: Private Final Consumption Expenditure, Volume(Bil.Ch.2010.EUR)	Series Comparison				.DESC	Germany: Private Final Consumption Expend Growth, Volume (Annualized % Change)	Germany: Private Final Consump Expenditure Growth, Volume(Annualized % Change)	Comparison
.T1		Q1-1960	Q1-1960	Q1-1960	Q1-1960	Q1-1960	Q1-1961	Q1-1960	Q1-1960								.T1	Q1-1970	Q1-1991	Spliced					.T1	Q2-1991	Q2-1960
.TN		Q4-2019	Q4-2019	Q4-2019	Q4-2019	Q4-2019	Q4-2019	Q4-2019	Q4-2019								.TN	Q1-2018	Q4-2019						.TN	Q4-2019	Q4-2015
.LSOURCE		Organization for Economic Cooperation & Development	Organization for Economic Cooperation & Development	Organization for Economic Cooperation & Development	Organization for Economic Cooperation & Devt	Organization for Economic Cooperation & Development	Organization for Economic Cooperation & Development	Organization for Economic Cooperation & Development	Organization for Economic Cooperation & Development								.LSOURCE	Deutsche Bundesbank	Organization for Economic Cooperation & Development				Series Difference	Growth Rate Implied by the Spliced Series	.LSOURCE	Organization for Economic Cooperation & Development	Organization for Economic Cooperation & Devt				Historical Germany Series
.DTLM		May-30-2018 07:53	May-30-2018 07:53	May-30-2018 07:53		May-30-2018 07:53	May-30-2018 07:53	May-30-2018 07:53	May-30-2018 07:53								.DTLM	May-24-2018 01:20	May-30-2018 07:53						.DTLM	May-30-2018 07:53	May-09-2014 15:38
Q1/1960	1960-03-31	1876.35	275.124	245.74	396.586	215.192	#N/A	39996	106.468								Q1/1960	#N/A	#N/A	396.586	#N/A	33.5551	#N/A		Q1/1960	#N/A	#N/A				396.586
Q2/1960	1960-06-30	1900.06	274.534	249.165	398.299	219.739	#N/A	40051	105.19								Q2/1960	#N/A	#N/A	398.299	#N/A	33.7	#N/A	1.7388	Q2/1960	#N/A	1.7388				398.299
Q3/1960	1960-09-30	1892.45	276.083	251.539	401.724	223.981	#N/A	41356	105.958								Q3/1960	#N/A	#N/A	401.724	#N/A	33.9898	#N/A	3.4849	Q3/1960	#N/A	3.4849				401.724
Q4/1960	1960-12-31	1894.94	275.967	255.51	407.32	227.974	#N/A	42640	108.683								Q4/1960	#N/A	#N/A	407.32	#N/A	34.4633	#N/A	5.6889	Q4/1960	#N/A	5.6889				407.32
Q1/1961	1961-03-31	1894.41	281.174	261.496	415.085	232.505	175.951	43789	113.367								Q1/1961	#N/A	#N/A	415.085	#N/A	35.1203	#N/A	7.8466	Q1/1961	#N/A	7.8466				415.085
Q2/1961	1961-06-30	1922.64	281.224	263.764	422.278	236.209	179.303	44836	117.192								Q2/1961	#N/A	#N/A	422.278	#N/A	35.7289	#N/A	7.114	Q2/1961	#N/A	7.114				422.278
Q3/1961	1961-09-30	1932	282.289	266.029	428.899	240.079	183.604	45612	120.157								Q3/1961	#N/A	#N/A	428.899	#N/A	36.2891	#N/A	6.4207	Q3/1961	#N/A	6.4207				428.899
Q4/1961	1961-12-31	1970.75	282.44	269.294	435.631	244.418	184.315	46862	122.508								Q4/1961	#N/A	#N/A	435.631	#N/A	36.8587	#N/A	6.4279	Q4/1961	#N/A	6.4279				435.631
Q1/1962	1962-03-31	1991.68	285.17	277.402	442.474	246.078	188.514	47633	124.246								Q1/1962	#N/A	#N/A	442.474	#N/A	37.4377	#N/A	6.4332	Q1/1962	#N/A	6.4332				442.474
Q2/1962	1962-06-30	2016.14	289.898	281.773	448.071	252.097	189.704	48294	126.712								Q2/1962	#N/A	#N/A	448.071	#N/A	37.9112	#N/A	5.1562	Q2/1962	#N/A	5.1562				448.071
Q3/1962	1962-09-30	2032.47	288.293	286.358	452.421	258.506	188.983	48718	129.908								Q3/1962	#N/A	#N/A	452.421	#N/A	38.2793	#N/A	3.9401	Q3/1962	#N/A	3.9401				452.421
Q4/1962	1962-12-31	2061.3	292.274	288.95	455.248	264.62	192.652	50125	133.934								Q4/1962	#N/A	#N/A	455.248	#N/A	38.5185	#N/A	2.5231	Q4/1962	#N/A	2.5231				455.248
Q1/1963	1963-03-31	2075.23	297.85	294.086	456.552	274.601	194.113	50988	138.791								Q1/1963	#N/A	#N/A	456.552	#N/A	38.6288	#N/A	1.151	Q1/1963	#N/A	1.151				456.552
Q2/1963	1963-06-30	2095.1	307.118	302.289	459.348	278.262	197.075	52284	142.524								Q2/1963	#N/A	#N/A	459.348	#N/A	38.8654	#N/A	2.4722	Q2/1963	#N/A	2.4722				459.348
Q3/1963	1963-09-30	2123.67	310.126	307.961	463.636	280.717	198.27	53805	145.133								Q3/1963	#N/A	#N/A	463.636	#N/A	39.2282	#N/A	3.7861	Q3/1963	#N/A	3.7861				463.636
Q4/1963	1963-12-31	2141.37	309.318	311.879	468.976	282.426	201.489	54804	146.638								Q4/1963	#N/A	#N/A	468.976	#N/A	39.68	#N/A	4.6872	Q4/1963	#N/A	4.6872				468.976
Q1/1964	1964-03-31	2183.58	313.335	317.837	475.368	285.479	205.489	56838	147.039								Q1/1964	#N/A	#N/A	475.368	#N/A	40.2208	#N/A	5.5647	Q1/1964	#N/A	5.5647				475.368
Q2/1964	1964-06-30	2221.99	314.409	318.539	482.433	287.029	205.857	58764	148.169								Q2/1964	#N/A	#N/A	482.433	#N/A	40.8186	#N/A	6.0787	Q2/1964	#N/A	6.0787				482.433
Q3/1964	1964-09-30	2262.83	316.751	321.043	490.171	288.968	209.79	59383	150.026								Q3/1964	#N/A	#N/A	490.171	#N/A	41.4733	#N/A	6.5715	Q3/1964	#N/A	6.5715				490.171
Q4/1964	1964-12-31	2269.2	321.372	324.784	499.163	291.513	211.292	59739	152.397								Q4/1964	#N/A	#N/A	499.163	#N/A	42.2341	#N/A	7.5425	Q4/1964	#N/A	7.5425				499.163
Q1/1965	1965-03-31	2319.79	320.424	324.184	509.41	290.389	213.454	60396	155.281								Q1/1965	#N/A	#N/A	509.41	#N/A	43.1011	#N/A	8.4677	Q1/1965	#N/A	8.4677				509.41
Q2/1965	1965-06-30	2345.51	320.399	331.818	517.799	294.726	218.561	61150	158.134								Q2/1965	#N/A	#N/A	517.799	#N/A	43.8109	#N/A	6.7521	Q2/1965	#N/A	6.7521				517.799
Q3/1965	1965-09-30	2385.88	324.465	337.386	524.331	299.876	221.836	62581	160.957								Q3/1965	#N/A	#N/A	524.331	#N/A	44.3636	#N/A	5.1422	Q3/1965	#N/A	5.1422				524.331
Q4/1965	1965-12-31	2452.94	325.52	338.312	529.391	305.611	226.189	64120	163.88								Q4/1965	#N/A	#N/A	529.391	#N/A	44.7917	#N/A	3.9163	Q4/1965	#N/A	3.9163				529.391
Q1/1966	1966-03-31	2489.06	330.364	341.387	532.979	309.765	227.992	65985	166.904								Q1/1966	#N/A	#N/A	532.979	#N/A	45.0953	#N/A	2.7385	Q1/1966	#N/A	2.7385				532.979
Q2/1966	1966-06-30	2495.35	333.361	347.644	535.894	315.989	228.896	67298	169.784								Q2/1966	#N/A	#N/A	535.894	#N/A	45.342	#N/A	2.2061	Q2/1966	#N/A	2.2061				535.894
Q3/1966	1966-09-30	2523.76	328.149	349.399	538.138	322.131	233.217	68758	172.519								Q3/1966	#N/A	#N/A	538.138	#N/A	45.5318	#N/A	1.6849	Q3/1966	#N/A	1.6849				538.138
Q4/1966	1966-12-31	2534.18	328.865	355.178	539.012	327.976	233.157	71091	175.12								Q4/1966	#N/A	#N/A	539.012	#N/A	45.6057	#N/A	0.6514	Q4/1966	#N/A	0.6514				539.012
Q1/1967	1967-03-31	2548.94	332.054	360.39	538.517	335.775	235.041	72627	177.587								Q1/1967	#N/A	#N/A	538.517	#N/A	45.5639	#N/A	-0.3666	Q1/1967	#N/A	-0.3666				538.517
Q2/1967	1967-06-30	2583.71	337.201	363.128	540.034	340.482	239.323	74854	180.102								Q2/1967	#N/A	#N/A	540.034	#N/A	45.6922	#N/A	1.1315	Q2/1967	#N/A	1.1315				540.034
Q3/1967	1967-09-30	2596.87	344.35	367.308	543.563	344.789	239.063	76698	182.663								Q3/1967	#N/A	#N/A	543.563	#N/A	45.9908	#N/A	2.6393	Q3/1967	#N/A	2.6393				543.563
Q4/1967	1967-12-31	2612.71	347.559	369.866	548.564	349.015	243.394	77335	185.175								Q4/1967	#N/A	#N/A	548.564	#N/A	46.414	#N/A	3.7317	Q4/1967	#N/A	3.7317				548.564
Q1/1968	1968-03-31	2674.8	358.377	370.385	553.637	352.133	245.851	78248	187.637								Q1/1968	#N/A	#N/A	553.637	#N/A	46.8432	#N/A	3.7509	Q1/1968	#N/A	3.7509				553.637
Q2/1968	1968-06-30	2715.62	345.486	368.863	563.157	357.11	246.46	80879	190.447								Q2/1968	#N/A	#N/A	563.157	#N/A	47.6487	#N/A	7.0573	Q2/1968	#N/A	7.0573				563.157
Q3/1968	1968-09-30	2766.57	352.035	386.679	573.32	362.696	251.103	82785	193.602								Q3/1968	#N/A	#N/A	573.32	#N/A	48.5086	#N/A	7.4165	Q3/1968	#N/A	7.4165				573.32
Q4/1968	1968-12-31	2779.12	352.595	396.609	582.473	368.94	254.628	85351	197.203								Q4/1968	#N/A	#N/A	582.473	#N/A	49.283	#N/A	6.5403	Q4/1968	#N/A	6.5403				582.473
Q1/1969	1969-03-31	2810.22	352.56	395.56	598.176	372.533	260.099	87170	201.248								Q1/1969	#N/A	#N/A	598.176	#N/A	50.6116	#N/A	11.2279	Q1/1969	#N/A	11.2279				598.176
Q2/1969	1969-06-30	2828.2	355.97	406.403	607.672	380.139	258.775	89580	204.753								Q2/1969	#N/A	#N/A	607.672	#N/A	51.415	#N/A	6.5023	Q2/1969	#N/A	6.5023				607.672
Q3/1969	1969-09-30	2841.91	356.646	410.627	619.506	387.927	261.361	90737	207.72								Q3/1969	#N/A	#N/A	619.506	#N/A	52.4163	#N/A	8.0206	Q3/1969	#N/A	8.0206				619.506
Q4/1969	1969-12-31	2864.64	359.628	407.777	628.441	395.32	264.35	93613	210.197								Q4/1969	#N/A	#N/A	628.441	#N/A	53.1723	#N/A	5.8951	Q4/1969	#N/A	5.8951				628.441
Q1/1970	1970-03-31	2882.33	361.48	415.951	639.543	407.919	261.702	94868	213.812								Q1/1970	159.75	#N/A	639.543	54.0994	54.1117	-0.012334	7.2561	Q1/1970	#N/A	7.2561				639.543
Q2/1970	1970-06-30	2895.61	367.474	420.97	655.422	409.672	263.394	95509	214.521								Q2/1970	163.72	#N/A	655.422	55.4438	55.4552	-0.011401	10.3074	Q2/1970	#N/A	10.3074	#N/A	#N/A	#N/A	655.422
Q3/1970	1970-09-30	2921.06	373.348	423.808	669.676	415.578	268.191	99028	215.939								Q3/1970	167.27	#N/A	669.676	56.646	56.6612	-0.0152298	8.9871	Q3/1970	#N/A	8.9871	#N/A	#N/A	#N/A	669.676
Q4/1970	1970-12-31	2913.13	371.708	434.238	677.856	419.577	270.669	98370	218.079								Q4/1970	169.29	#N/A	677.856	57.3301	57.3533	-0.0231978	4.9757	Q4/1970	#N/A	4.9757	#N/A	#N/A	#N/A	677.856
Q1/1971	1971-03-31	2968.9	370.749	437.99	679.258	425.102	268.528	99976	220.921								Q1/1971	169.69	#N/A	679.258	57.4655	57.4719	-0.00637712	0.83	Q1/1971	#N/A	0.83	#N/A	#N/A	#N/A	679.258
Q2/1971	1971-06-30	2996.12	379.317	444.688	693.556	429.992	278.111	101687	224.324								Q2/1971	173.26	#N/A	693.556	58.6745	58.6817	-0.0072054	8.6898	Q2/1971	#N/A	8.6898	#N/A	#N/A	#N/A	693.556
Q3/1971	1971-09-30	3020.04	385.704	451.06	701.539	431.464	284.379	102945	228.282								Q3/1971	175.25	#N/A	701.539	59.3484	59.3571	-0.00866165	4.6837	Q3/1971	#N/A	4.6837	#N/A	#N/A	#N/A	701.539
Q4/1971	1971-12-31	3070.23	389.14	456.025	710.454	432.397	290.219	104472	232.8								Q4/1971	177.42	#N/A	710.454	60.0833	60.1114	-0.0281266	5.1811	Q4/1971	#N/A	5.1811	#N/A	#N/A	#N/A	710.454
Q1/1972	1972-03-31	3110.8	394.766	463.136	722.913	438.358	291.28	107268	237.866								Q1/1972	180.56	#N/A	722.913	61.1467	61.1656	-0.0188831	7.2011	Q1/1972	#N/A	7.2011	#N/A	#N/A	#N/A	722.913
Q2/1972	1972-06-30	3170.16	404.595	464.253	725.464	441.857	298.647	110237	242.906								Q2/1972	181.25	#N/A	725.464	61.3803	61.3815	-0.0011147	1.4194	Q2/1972	#N/A	1.4194	#N/A	#N/A	#N/A	725.464
Q3/1972	1972-09-30	3219.1	410.428	474.367	739.568	445.174	300.742	112685	247.908								Q3/1972	184.75	#N/A	739.568	62.5656	62.5748	-0.00915242	8.0061	Q3/1972	#N/A	8.0061	#N/A	#N/A	#N/A	739.568
Q4/1972	1972-12-31	3294.61	414.818	478.391	746.233	450.761	307.465	115611	252.871								Q4/1972	186.38	#N/A	746.233	63.1176	63.1387	-0.0210882	3.6539	Q4/1972	#N/A	3.6539	#N/A	#N/A	#N/A	746.233
Q1/1973	1973-03-31	3354.76	430.974	489.579	750.157	458.048	315.474	118875	257.801								Q1/1973	187.36	#N/A	750.157	63.4495	63.4707	-0.0211716	2.1197	Q1/1973	#N/A	2.1197	#N/A	#N/A	#N/A	750.157
Q2/1973	1973-06-30	3353.36	428.022	492.982	759.963	465.883	317.534	119187	262.461								Q2/1973	189.81	#N/A	759.963	64.2792	64.3004	-0.0212096	5.3325	Q2/1973	#N/A	5.3325	#N/A	#N/A	#N/A	759.963
Q3/1973	1973-09-30	3365.33	432.139	495.422	757.69	471.515	319.919	121577	266.863								Q3/1973	189.27	#N/A	757.69	64.0963	64.108	-0.0117327	-1.1912	Q3/1973	#N/A	-1.1912	#N/A	#N/A	#N/A	757.69
Q4/1973	1973-12-31	3355.49	428.31	506.675	754.409	476.332	325.871	125424	270.995								Q4/1973	188.44	#N/A	754.409	63.8152	63.8305	-0.0152543	-1.7206	Q4/1973	#N/A	-1.7206	#N/A	#N/A	#N/A	754.409
Q1/1974	1974-03-31	3326.2	421.064	507.695	748.567	477.613	334.739	117891	274.869								Q1/1974	186.99	#N/A	748.567	63.3242	63.3362	-0.0120106	-3.0617	Q1/1974	#N/A	-3.0617	#N/A	#N/A	#N/A	748.567
Q2/1974	1974-06-30	3337.86	422.699	510.839	752.109	484.455	336.573	121051	277.672								Q2/1974	187.86	#N/A	752.109	63.6188	63.6359	-0.0170642	1.9061	Q2/1974	#N/A	1.9061	#N/A	#N/A	#N/A	752.109
Q3/1974	1974-09-30	3351.62	427.477	511.444	759.474	485.027	337.834	123451	279.413								Q3/1974	189.7	#N/A	759.474	64.2419	64.259	-0.0171004	3.9749	Q3/1974	#N/A	3.9749	#N/A	#N/A	#N/A	759.474
Q4/1974	1974-12-31	3302.48	428.375	509.453	757.937	481.51	333.549	122261	280.102								Q4/1974	189.34	#N/A	757.937	64.12	64.129	-0.00896145	-0.8071	Q4/1974	#N/A	-0.8071	#N/A	#N/A	#N/A	757.937
Q1/1975	1975-03-31	3330.13	426.645	510.043	773.944	478.554	340.889	125023	279.722								Q1/1975	193.35	#N/A	773.944	65.478	65.4833	-0.00528495	8.7188	Q1/1975	#N/A	8.7188	#N/A	#N/A	#N/A	773.944
Q2/1975	1975-06-30	3385.74	427.225	514.111	776.843	478.986	344.869	126280	280.889								Q2/1975	194.04	#N/A	776.843	65.7117	65.7286	-0.0169426	1.507	Q2/1975	#N/A	1.507	#N/A	#N/A	#N/A	776.843
Q3/1975	1975-09-30	3434.09	422.79	521.986	784.704	485.654	351.183	126906	283.602								Q3/1975	195.96	#N/A	784.704	66.3619	66.3937	-0.031802	4.1092	Q3/1975	#N/A	4.1092	#N/A	#N/A	#N/A	784.704
Q4/1975	1975-12-31	3470.49	418.91	531.755	794.606	495.466	357.032	127789	287.869								Q4/1975	198.49	#N/A	794.606	67.2187	67.2315	-0.0128311	5.1439	Q4/1975	#N/A	5.1439	#N/A	#N/A	#N/A	794.606
Q1/1976	1976-03-31	3539.87	420.968	538.831	802.122	501.397	356.818	128112	293.689								Q1/1976	200.36	#N/A	802.122	67.8519	67.8675	-0.0155433	3.8379	Q1/1976	#N/A	3.8379	#N/A	#N/A	#N/A	802.122
Q2/1976	1976-06-30	3572.44	423.209	543.627	808.857	504.821	366.197	129083	298.085								Q2/1976	202.03	#N/A	808.857	68.4175	68.4373	-0.0198075	3.4009	Q2/1976	#N/A	3.4009	#N/A	#N/A	#N/A	808.857
Q3/1976	1976-09-30	3610.33	426.614	550.952	813.309	510.315	367.484	131245	301.069								Q3/1976	203.18	#N/A	813.309	68.8069	68.814	-0.00703147	2.2198	Q3/1976	#N/A	2.2198	#N/A	#N/A	#N/A	813.309
Q4/1976	1976-12-31	3657.46	427.185	556.072	823.743	512.911	374.958	132271	302.635								Q4/1976	205.75	#N/A	823.743	69.6773	69.6968	-0.019532	5.2313	Q4/1976	#N/A	5.2313	#N/A	#N/A	#N/A	823.743
Q1/1977	1977-03-31	3699.29	419.546	556.207	834.361	517.901	373.411	133539	302.783								Q1/1977	208.35	#N/A	834.361	70.5578	70.5951	-0.0373913	5.2563	Q1/1977	#N/A	5.2563	#N/A	#N/A	#N/A	834.361
Q2/1977	1977-06-30	3719.73	416.952	557.507	848.182	520.324	372.655	135218	303.061								Q2/1977	211.85	#N/A	848.182	71.743	71.7646	-0.0215471	6.7926	Q2/1977	#N/A	6.7926	#N/A	#N/A	#N/A	848.182
Q3/1977	1977-09-30	3755.19	421.735	564.408	855.231	526.411	378.258	136026	303.492								Q3/1977	213.63	#N/A	855.231	72.3458	72.361	-0.0151724	3.366	Q3/1977	#N/A	3.366	#N/A	#N/A	#N/A	855.231
Q4/1977	1977-12-31	3811.77	430.136	567.026	857.849	529.553	381.859	136930	304.066								Q4/1977	214.28	#N/A	857.849	72.566	72.5825	-0.0165767	1.2302	Q4/1977	#N/A	1.2302	#N/A	#N/A	#N/A	857.849
Q1/1978	1978-03-31	3833.83	438.467	573.691	867.115	533.547	384.537	139621	304.769								Q1/1978	216.62	#N/A	867.115	73.3584	73.3665	-0.00809885	4.3909	Q1/1978	#N/A	4.3909	#N/A	#N/A	#N/A	867.115
Q2/1978	1978-06-30	3915.62	440.778	582.443	870.181	533.082	387.198	140662	305.581								Q2/1978	217.38	#N/A	870.181	73.6158	73.6259	-0.0101451	1.4219	Q2/1978	#N/A	1.4219	#N/A	#N/A	#N/A	870.181
Q3/1978	1978-09-30	3932.01	449.547	584.244	889.749	536.15	389.098	143245	306.483								Q3/1978	222.26	#N/A	889.749	75.2684	75.2815	-0.0131629	9.3028	Q3/1978	#N/A	9.3028	#N/A	#N/A	#N/A	889.749
Q4/1978	1978-12-31	3963.52	447.619	592.235	898.122	544.863	390.283	146640	307.488								Q4/1978	224.36	#N/A	898.122	75.9795	75.99	-0.0104952	3.818	Q4/1978	#N/A	3.818	#N/A	#N/A	#N/A	898.122
Q1/1979	1979-03-31	3983.6	452.569	598.34	891.824	556.859	395.873	149401	308.591								Q1/1979	222.77	#N/A	891.824	75.4411	75.4572	-0.0160751	-2.7756	Q1/1979	#N/A	-2.7756	#N/A	#N/A	#N/A	891.824
Q2/1979	1979-06-30	3981.26	480.229	602.491	924.905	566.454	396.051	152175	309.622								Q2/1979	231.04	#N/A	924.905	78.2417	78.2561	-0.0143816	15.6834	Q2/1979	#N/A	15.6834	#N/A	#N/A	#N/A	924.905
Q3/1979	1979-09-30	4020.45	462.736	604.157	903.319	577.088	396.849	153033	310.569								Q3/1979	225.62	#N/A	903.319	76.4062	76.4297	-0.0234314	-9.0139	Q3/1979	#N/A	-9.0139	#N/A	#N/A	#N/A	903.319
Q4/1979	1979-12-31	4031.2	467.388	607.099	917.61	589.129	397.844	152540	311.446								Q4/1979	229.24	#N/A	917.61	77.6322	77.6388	-0.00668029	6.48	Q4/1979	#N/A	6.48	#N/A	#N/A	#N/A	917.61
Q1/1980	1980-03-31	4025.02	474.467	610.256	922.483	600.539	400.848	152682	312.958								Q1/1980	230.46	#N/A	922.483	78.0453	78.0511	-0.00583183	2.1412	Q1/1980	#N/A	2.1412	#N/A	#N/A	#N/A	922.483
Q2/1980	1980-06-30	3934.46	462.943	607.048	917.322	608.816	398.948	152386	312.778								Q2/1980	229.13	#N/A	917.322	77.5949	77.6145	-0.0195776	-2.2191	Q2/1980	#N/A	-2.2191	#N/A	#N/A	#N/A	917.322
Q3/1980	1980-09-30	3976.89	467.908	609.704	923.647	612.415	405.66	153832	311.801								Q3/1980	230.72	#N/A	923.647	78.1334	78.1496	-0.0162841	2.7867	Q3/1980	#N/A	2.7867	#N/A	#N/A	#N/A	923.647
Q4/1980	1980-12-31	4029.6	459.724	612.08	921.922	614.041	408.25	154692	310.135								Q4/1980	230.32	#N/A	921.922	77.9979	78.0037	-0.00580168	-0.7449	Q4/1980	#N/A	-0.7449	#N/A	#N/A	#N/A	921.922
Q1/1981	1981-03-31	4050.8	465.542	612.564	925.051	615.813	410.048	154467	310.373								Q1/1981	231.08	#N/A	925.051	78.2553	78.2685	-0.0131862	1.3646	Q1/1981	#N/A	1.3646	#N/A	#N/A	#N/A	925.051
Q2/1981	1981-06-30	4050.08	467.257	621.412	916.359	615.126	409.061	155522	308.681								Q2/1981	228.91	#N/A	916.359	77.5204	77.533	-0.0125983	-3.706	Q2/1981	#N/A	-3.706	#N/A	#N/A	#N/A	916.359
Q3/1981	1981-09-30	4066.36	468.963	623.256	916.201	628.137	406.843	156552	307.684								Q3/1981	228.87	#N/A	916.201	77.5069	77.5197	-0.0128439	-0.0686	Q3/1981	#N/A	-0.0686	#N/A	#N/A	#N/A	916.201
Q4/1981	1981-12-31	4035.87	468.115	630.604	919.855	623.097	407.076	157837	308.494								Q4/1981	229.78	#N/A	919.855	77.815	77.8288	-0.0137887	1.6046	Q4/1981	#N/A	1.6046	#N/A	#N/A	#N/A	919.855
Q1/1982	1982-03-31	4062.61	465.501	635.992	919.469	625.621	401.516	160216	307.922								Q1/1982	229.67	#N/A	919.469	77.7778	77.7961	-0.0183705	-0.1678	Q1/1982	#N/A	-0.1678	#N/A	#N/A	#N/A	919.469
Q2/1982	1982-06-30	4077.62	470.113	641.148	910.973	623.327	398.218	163109	308.874								Q2/1982	227.54	#N/A	910.973	77.0565	77.0773	-0.0208765	-3.645	Q2/1982	#N/A	-3.645	#N/A	#N/A	#N/A	910.973
Q3/1982	1982-09-30	4109.14	477.868	642.732	898.046	629.094	396.732	162647	309.331								Q3/1982	224.32	#N/A	898.046	75.966	75.9835	-0.0175474	-5.5566	Q3/1982	#N/A	-5.5566	#N/A	#N/A	#N/A	898.046
Q4/1982	1982-12-31	4184.1	482.868	650.528	908.235	627.373	395.369	166992	309.601								Q4/1982	226.85	#N/A	908.235	76.8228	76.8457	-0.0228673	4.6162	Q4/1982	#N/A	4.6162	#N/A	#N/A	#N/A	908.235
Q1/1983	1983-03-31	4224.78	486.698	648.496	915.916	615.717	400.863	166797	310.431								Q1/1983	228.77	#N/A	915.916	77.473	77.4955	-0.0225511	3.426	Q1/1983	#N/A	3.426	#N/A	#N/A	#N/A	915.916
Q2/1983	1983-06-30	4308.4	492.879	648.224	928.755	621.441	405.664	167601	310.604								Q2/1983	231.98	#N/A	928.755	78.5601	78.5818	-0.0217594	5.7259	Q2/1983	#N/A	5.7259	#N/A	#N/A	#N/A	928.755
Q3/1983	1983-09-30	4383.99	501.593	645.292	914.538	628.796	410.494	169750	309.717								Q3/1983	228.4	#N/A	914.538	77.3477	77.3789	-0.0312229	-5.9839	Q3/1983	#N/A	-5.9839	#N/A	#N/A	#N/A	914.538
Q4/1983	1983-12-31	4453.14	501.845	648.172	927.895	634.691	414.91	170332	309.8								Q4/1983	231.76	#N/A	927.895	78.4856	78.5091	-0.0235452	5.9716	Q4/1983	#N/A	5.9716	#N/A	#N/A	#N/A	927.895
Q1/1984	1984-03-31	4490.87	506.588	650.892	935.154	637.939	418.358	171664	308.81								Q1/1984	233.54	#N/A	935.154	79.0884	79.1233	-0.0349416	3.1662	Q1/1984	#N/A	3.1662	#N/A	#N/A	#N/A	935.154
Q2/1984	1984-06-30	4554.91	509.106	652.8	939.113	643.099	422.715	172697	307.793								Q2/1984	234.58	#N/A	939.113	79.4405	79.4582	-0.0176976	1.7041	Q2/1984	#N/A	1.7041	#N/A	#N/A	#N/A	939.113
Q3/1984	1984-09-30	4589.93	507.204	655.004	943.858	646.716	423.242	174771	310.366								Q3/1984	235.78	#N/A	943.858	79.8469	79.8597	-0.0127668	2.0363	Q3/1984	#N/A	2.0363	#N/A	#N/A	#N/A	943.858
Q4/1984	1984-12-31	4650.6	517.345	650.632	943.664	647.797	430.697	174916	311.106								Q4/1984	235.74	#N/A	943.664	79.8334	79.8433	-0.00991658	-0.0821	Q4/1984	#N/A	-0.0821	#N/A	#N/A	#N/A	943.664
Q1/1985	1985-03-31	4729.66	523.562	659.94	947.405	654.806	436.342	177290	315.403								Q1/1985	236.61	#N/A	947.405	80.128	80.1598	-0.0317991	1.5951	Q1/1985	#N/A	1.5951	#N/A	#N/A	#N/A	947.405
Q2/1985	1985-06-30	4774.07	527.114	661.384	954.106	654.547	440.379	180113	315.139								Q2/1985	238.27	#N/A	954.106	80.6902	80.7268	-0.0366184	2.8594	Q2/1985	#N/A	2.8594	#N/A	#N/A	#N/A	954.106
Q3/1985	1985-09-30	4865.75	536.105	665.66	963.661	668.878	448.773	180704	317.127								Q3/1985	240.73	#N/A	963.661	81.5232	81.5352	-0.011982	4.0664	Q3/1985	#N/A	4.0664	#N/A	#N/A	#N/A	963.661
Q4/1985	1985-12-31	4878.25	544.536	672.956	972.514	671.785	453.528	184519	318.664								Q4/1985	242.86	#N/A	972.514	82.2446	82.2843	-0.0397508	3.7259	Q4/1985	#N/A	3.7259	#N/A	#N/A	#N/A	972.514
Q1/1986	1986-03-31	4919.63	559.214	678.644	980.727	676.764	453.031	185013	319.828								Q1/1986	244.99	#N/A	980.727	82.9659	82.9792	-0.0133107	3.421	Q1/1986	#N/A	3.421	#N/A	#N/A	#N/A	980.727
Q2/1986	1986-06-30	4974.63	568.579	690.024	995.447	685.355	458.265	186195	325.148								Q2/1986	248.64	#N/A	995.447	84.202	84.2247	-0.0226885	6.1402	Q2/1986	#N/A	6.1402	#N/A	#N/A	#N/A	995.447
Q3/1986	1986-09-30	5064.7	572.378	693.364	1001.19	697.316	464.746	188888	328.557								Q3/1986	250.08	#N/A	1001.19	84.6896	84.7104	-0.0207287	2.3267	Q3/1986	#N/A	2.3267	#N/A	#N/A	#N/A	1001.19
Q4/1986	1986-12-31	5097.12	576.672	695.016	1006.14	697.872	464.756	189390	335.89								Q4/1986	251.35	#N/A	1006.14	85.1197	85.1295	-0.00980274	1.994	Q4/1986	#N/A	1.994	#N/A	#N/A	#N/A	1006.14
Q1/1987	1987-03-31	5097.89	585.653	701.356	1001.27	702.386	469.143	192007	340.444								Q1/1987	250.08	#N/A	1001.27	84.6896	84.717	-0.0273843	-1.9242	Q1/1987	#N/A	-1.9242	#N/A	#N/A	#N/A	1001.27
Q2/1987	1987-06-30	5168.61	596.602	710.264	1031.19	713.824	476.788	193741	345.049								Q2/1987	257.56	#N/A	1031.19	87.2227	87.2487	-0.0259863	12.5003	Q2/1987	#N/A	12.5003	#N/A	#N/A	#N/A	1031.19
Q3/1987	1987-09-30	5228.52	611.664	712.2	1035.64	718.773	480.831	196431	349.134								Q3/1987	258.65	#N/A	1035.64	87.5919	87.6256	-0.0337657	1.7392	Q3/1987	#N/A	1.7392	#N/A	#N/A	#N/A	1035.64
Q4/1987	1987-12-31	5239.48	625.085	724.876	1052.43	722.793	486.61	200006	352.742								Q4/1987	262.91	#N/A	1052.43	89.0345	89.0457	-0.0112208	6.6419	Q4/1987	#N/A	6.6419	#N/A	#N/A	#N/A	1052.43
Q1/1988	1988-03-31	5332.66	640.267	725.176	1030.53	732.953	489.914	202278	357.136								Q1/1988	257.38	#N/A	1030.53	87.1618	87.1927	-0.0309032	-8.0678	Q1/1988	#N/A	-8.0678	#N/A	#N/A	#N/A	1030.53
Q2/1988	1988-06-30	5371.79	648.31	729.276	1054.17	736.611	496.863	205737	360.686								Q2/1988	263.27	#N/A	1054.17	89.1564	89.1936	-0.0371457	9.5	Q2/1988	#N/A	9.5	#N/A	#N/A	#N/A	1054.17
Q3/1988	1988-09-30	5417.67	664.184	738.836	1067.14	747.842	499.973	206149	365.536								Q3/1988	266.56	#N/A	1067.14	90.2706	90.2908	-0.0202566	5.0124	Q3/1988	#N/A	5.0124	#N/A	#N/A	#N/A	1067.14
Q4/1988	1988-12-31	5479.7	671.409	745.728	1069.06	755.936	506.583	208281	371.866								Q4/1988	267.03	#N/A	1069.06	90.4297	90.453	-0.023245	0.7203	Q4/1988	#N/A	0.7203	#N/A	#N/A	#N/A	1069.06
Q1/1989	1989-03-31	5504.97	674.563	753.232	1076.58	761.335	510.316	214587	376.22								Q1/1989	268.87	#N/A	1076.58	91.0529	91.0889	-0.0360593	2.842	Q1/1989	#N/A	2.842	#N/A	#N/A	#N/A	1076.58
Q2/1989	1989-06-30	5530.92	679.588	754.616	1077.71	766.96	517.062	210755	382.344								Q2/1989	269.16	#N/A	1077.71	91.1511	91.1848	-0.0337752	0.4219	Q2/1989	#N/A	0.4219	#N/A	#N/A	#N/A	1077.71
Q3/1989	1989-09-30	5585.85	681.541	762.796	1095.56	779.291	515.653	215460	387.155								Q3/1989	273.61	#N/A	1095.56	92.6581	92.6955	-0.0374836	6.7935	Q3/1989	#N/A	6.7935	#N/A	#N/A	#N/A	1095.56
Q4/1989	1989-12-31	5610.53	689.225	768.712	1112.46	784.235	519.03	221379	388.474								Q4/1989	277.87	#N/A	1112.46	94.1007	94.1254	-0.0246779	6.3143	Q4/1989	#N/A	6.3143	#N/A	#N/A	#N/A	1112.46
Q1/1990	1990-03-31	5658.69	695.542	774.924	1120.67	781.683	527.28	220587	391.877								Q1/1990	279.93	#N/A	1120.67	94.7983	94.8196	-0.0212805	2.983	Q1/1990	#N/A	2.983	#N/A	#N/A	#N/A	1120.67
Q2/1990	1990-06-30	5676.42	703.499	778.184	1133.36	791.586	521.502	228090	395.357								Q2/1990	283.11	#N/A	1133.36	95.8752	95.8937	-0.0184491	4.6086	Q2/1990	#N/A	4.6086	#N/A	#N/A	#N/A	1133.36
Q3/1990	1990-09-30	5699.3	699.342	779.064	1144.3	789.756	521.8	230231	399.493								Q3/1990	285.82	#N/A	1144.3	96.793	96.819	-0.0260035	3.9159	Q3/1990	#N/A	3.9159	#N/A	#N/A	#N/A	1144.3
Q4/1990	1990-12-31	5656.17	695.224	784.576	1152.18	793.085	520.19	228053	401.326								Q4/1990	287.81	#N/A	1152.18	97.4669	97.4859	-0.0190269	2.784	Q4/1990	#N/A	2.784	#N/A	#N/A	#N/A	1152.18
Q1/1991	1991-03-31	5636.71	688.928	783.2	1181.89	805.499	509.706	228855	403.043								Q1/1991	295.29	1181.89	1181.89	100	100	0	10.7216	Q1/1991	#N/A	10.7216	#N/A	#N/A	#N/A	1181.89
Q2/1991	1991-06-30	5684.02	680.784	785.968	1194.91	805.703	518.324	232207	405.526								Q2/1991	298.5	1194.91	1194.91	101.087	101.101	-0.0142999	4.47878	Q2/1991	4.4786	5.3415	4.47878	-0.000183889	0.862716	1194.91
Q3/1991	1991-09-30	5711.64	682.151	783.24	1161.21	815.017	518.101	231484	410.53								Q3/1991	290.16	1161.21	1161.21	98.2627	98.2501	0.0126264	-10.8125	Q3/1991	-10.8123	-9.5146	-10.8125	0.00022547	1.29793	1161.21
Q4/1991	1991-12-31	5710.05	678.665	786.784	1191.59	816.735	521.131	234247	414.782								Q4/1991	297.71	1191.59	1191.59	100.82	100.82	-0.000336445	10.8798	Q4/1991	10.8798	12.0674	10.8798	-3.05208e-05	1.18757	1191.59
Q1/1992	1992-03-31	5817.32	677.338	788.248	1212.52	823.267	521.259	237643	419.529								Q1/1992	302.91	1212.52	1212.52	102.581	102.591	-0.0106637	7.215	Q1/1992	7.215	7.048	7.215	4.15153e-06	-0.166996	1212.52
Q2/1992	1992-06-30	5857.17	689.705	789.868	1206.59	831.585	523.403	236484	419.671								Q2/1992	301.43	1206.59	1206.59	102.079	102.09	-0.0102139	-1.94163	Q2/1992	-1.9418	-4.7498	-1.94163	-0.000172972	-2.80817	1206.59
Q3/1992	1992-09-30	5920.6	699.206	794.248	1208.04	826.832	526.186	236558	416.467								Q3/1992	301.83	1208.04	1208.04	102.215	102.212	0.00290031	0.480229	Q3/1992	0.4803	-0.7829	0.480229	7.0512e-05	-1.26313	1208.04
Q4/1992	1992-12-31	5991.06	702.369	799.8	1243.33	817.46	528.102	235625	413.753								Q4/1992	310.65	1243.33	1243.33	105.202	105.198	0.00408092	12.2064	Q4/1992	12.2064	16.5845	12.2064	-2.36763e-05	4.37808	1243.33
Q1/1993	1993-03-31	6013.83	709.68	788.032	1217.47	800.699	530.884	238984	409.398								Q1/1993	304.14	1217.47	1217.47	102.997	103.01	-0.0131967	-8.06123	Q1/1993	-8.0611	-10.3607	-8.06123	0.00012997	-2.29947	1217.47
Q2/1993	1993-06-30	6067.8	714.322	794.4	1218.2	800.396	532.814	237290	408.382								Q2/1993	304.36	1218.2	1218.2	103.072	103.072	4.87304e-05	0.238082	Q2/1993	0.2378	0.4585	0.238082	-0.000282018	0.220418	1218.2
Q3/1993	1993-09-30	6134.76	727.295	794.668	1228.75	796.736	536.296	237222	410.524								Q3/1993	307	1228.75	1228.75	103.966	103.965	0.000858546	3.51176	Q3/1993	3.5121	5.2673	3.51176	0.000344064	1.75554	1228.75
Q4/1993	1993-12-31	6189.1	732.855	798.032	1242.64	801.086	537.621	242339	409.36								Q4/1993	310.46	1242.64	1242.64	105.137	105.14	-0.00222022	4.59722	Q4/1993	4.597	2.0467	4.59722	-0.000219657	-2.55052	1242.64
Q1/1994	1994-03-31	6260.05	740.989	797.996	1245.82	801.061	546.381	242590	408.337								Q1/1994	311.26	1245.82	1245.82	105.408	105.409	-0.000444152	1.02789	Q1/1994	1.0281	3.3994	1.02789	0.000211675	2.37151	1245.82
Q2/1994	1994-06-30	6308.61	740.666	806.172	1241.48	810.536	547.222	243634	413.116								Q2/1994	310.18	1241.48	1241.48	105.043	105.042	0.000851377	-1.38556	Q2/1994	-1.3858	-4.3365	-1.38556	-0.000240323	-2.95094	1241.48
Q3/1994	1994-09-30	6357.47	748.209	809.136	1252.47	814.389	549.61	245853	416.011								Q3/1994	312.92	1252.47	1252.47	105.97	105.972	-0.00119448	3.58856	Q3/1994	3.5887	2.3163	3.58856	0.000143592	-1.27226	1252.47
Q4/1994	1994-12-31	6425.93	751.519	811.956	1260.43	821.498	556.041	245527	417.928								Q4/1994	314.91	1260.43	1260.43	106.644	106.645	-0.000352339	2.56488	Q4/1994	2.5647	6.6518	2.56488	-0.000180811	4.08692	1260.43
Q1/1995	1995-03-31	6442.94	753.227	815.032	1265.02	818.311	555.814	247133	414.052								Q1/1995	316.03	1265.02	1265.02	107.024	107.033	-0.00959277	1.46527	Q1/1995	1.4653	-0.659	1.46527	3.41017e-05	-2.12427	1265.02
Q2/1995	1995-06-30	6500.69	757.608	828.124	1280.93	821.383	560.093	250191	420.976								Q2/1995	320.04	1280.93	1280.93	108.382	108.379	0.00233563	5.12613	Q2/1995	5.126	5.2182	5.12613	-0.000127166	0.0920728	1280.93
Q3/1995	1995-09-30	6560.33	761.588	821.556	1280.06	828.641	566.201	251449	422.588								Q3/1995	319.82	1280.06	1280.06	108.307	108.306	0.00127398	-0.270778	Q3/1995	-0.2707	-0.6086	-0.270778	7.7887e-05	-0.337822	1280.06
Q4/1995	1995-12-31	6606.36	769.633	822.476	1278.47	828.393	566.412	253233	426.168								Q4/1995	319.43	1278.47	1278.47	108.175	108.171	0.00381475	-0.496238	Q4/1995	-0.4962	0.2184	-0.496238	3.76804e-05	0.714638	1278.47
Q1/1996	1996-03-31	6667.7	779.344	835.96	1283.97	833.716	574.115	253379	423.7								Q1/1996	320.8	1283.97	1283.97	108.639	108.636	0.00274952	1.73068	Q1/1996	1.7307	0.623	1.73068	2.45162e-05	-1.10768	1283.97
Q2/1996	1996-06-30	6740.08	783.594	833.732	1289.61	830.22	575.246	255917	432.012								Q2/1996	322.21	1289.61	1289.61	109.116	109.113	0.00304646	1.76867	Q2/1996	1.7688	2.1068	1.76867	0.000133018	0.338133	1289.61
Q3/1996	1996-09-30	6780.7	792.561	843.552	1293.37	831.093	577.676	255606	433.844								Q3/1996	323.15	1293.37	1293.37	109.435	109.432	0.00315982	1.17167	Q3/1996	1.1714	1.525	1.17167	-0.000270992	0.353329	1293.37
Q4/1996	1996-12-31	6833.96	801.187	835.432	1295.68	837.062	588.319	258007	435.608								Q4/1996	323.73	1295.68	1295.68	109.631	109.627	0.00378963	0.717574	Q4/1996	0.7175	-0.0863	0.717574	-7.43547e-05	-0.803874	1295.68
Q1/1997	1997-03-31	6906.06	813.304	833.148	1300.53	839.888	598.43	262298	438.896								Q1/1997	324.92	1300.53	1300.53	110.034	110.037	-0.0031516	1.50415	Q1/1997	1.5042	1.3886	1.50415	5.09049e-05	-0.115549	1300.53
Q2/1997	1997-06-30	6937.42	823.812	838.328	1306.75	859.726	603.607	255519	439.048								Q2/1997	326.47	1306.75	1306.75	110.559	110.564	-0.00443276	1.92653	Q2/1997	1.9266	2.1247	1.92653	7.1676e-05	0.198172	1306.75
Q3/1997	1997-09-30	7056.14	837.787	845.108	1295.32	867.673	611.511	256378	441.08								Q3/1997	323.62	1295.32	1295.32	109.594	109.597	-0.00283311	-3.45194	Q3/1997	-3.4519	-2.5011	-3.45194	3.91585e-05	0.950839	1295.32
Q4/1997	1997-12-31	7139.91	834.294	853.256	1308.19	874.065	615.694	255802	455.484								Q4/1997	326.83	1308.19	1308.19	110.681	110.686	-0.0048646	4.03457	Q4/1997	4.0346	2.697	4.03457	2.81129e-05	-1.33757	1308.19
Q1/1998	1998-03-31	7213.55	845.949	861.292	1314.23	878.998	616.081	255206	454.348								Q1/1998	328.35	1314.23	1314.23	111.196	111.197	-0.000990872	1.85903	Q1/1998	1.859	1.939	1.85903	-3.48559e-05	0.0799651	1314.23
Q2/1998	1998-06-30	7340.99	855.663	873.632	1307.29	885.965	623.64	255140	461.268								Q2/1998	326.58	1307.29	1307.29	110.596	110.609	-0.0130398	-2.09619	Q2/1998	-2.0962	-2.2793	-2.09619	-8.22536e-06	-0.183108	1307.29
Q3/1998	1998-09-30	7437.54	869.777	882.316	1318.13	893.008	627.201	256826	463.824								Q3/1998	329.33	1318.13	1318.13	111.528	111.527	0.000484665	3.36047	Q3/1998	3.3605	4.3957	3.36047	2.89998e-05	1.03523	1318.13
Q4/1998	1998-12-31	7546.84	866.976	888.776	1330.86	897.256	629.003	256777	473.944								Q4/1998	332.51	1330.86	1330.86	112.605	112.604	0.000562106	3.91842	Q4/1998	3.9185	3.8676	3.91842	7.77013e-05	-0.0508223	1330.86
Q1/1999	1999-03-31	7618.69	885.641	890.12	1346.05	898.705	638.238	257403	474.832								Q1/1999	336.3	1346.05	1346.05	113.888	113.889	-0.000839575	4.64298	Q1/1999	4.6429	2.8843	4.64298	-8.11343e-05	-1.75868	1346.05
Q2/1999	1999-06-30	7731.53	896.845	897.672	1343.59	908.524	644.654	258393	482.86								Q2/1999	335.69	1343.59	1343.59	113.681	113.681	0.000554937	-0.728437	Q2/1999	-0.7286	-0.416	-0.728437	-0.000163205	0.312437	1343.59
Q3/1999	1999-09-30	7819.27	904.75	915.956	1345.9	917.387	652.614	259918	490.46								Q3/1999	336.26	1345.9	1345.9	113.874	113.877	-0.00220176	0.690683	Q3/1999	0.6907	1.6789	0.690683	1.71182e-05	0.988217	1345.9
Q4/1999	1999-12-31	7934.14	914.619	924.388	1363.55	921.335	658.86	260113	495.788								Q4/1999	340.67	1363.55	1363.55	115.368	115.37	-0.00161145	5.34778	Q4/1999	5.3479	5.5966	5.34778	0.000116115	0.248816	1363.55
Q1/2000	2000-03-31	8054.86	932.446	931.684	1370.09	922.308	665.868	262771	503.388								Q1/2000	342.3	1370.09	1370.09	115.92	115.923	-0.00329881	1.93356	Q1/2000	1.9336	0.4617	1.93356	3.69254e-05	-1.47186	1370.09
Q2/2000	2000-06-30	8132.19	935.7	939.864	1384.84	930.48	671.633	261770	505.888								Q2/2000	345.98	1384.84	1384.84	117.166	117.171	-0.00531592	4.37723	Q2/2000	4.377	4.2406	4.37723	-0.000228484	-0.136628	1384.84
Q3/2000	2000-09-30	8211.28	946.12	944.728	1386	934.491	680.291	262245	512.068								Q3/2000	346.27	1386	1386	117.264	117.269	-0.00500102	0.334608	Q3/2000	0.3346	1.2616	0.334608	-8.30865e-06	0.926992	1386
Q4/2000	2000-12-31	8284.4	954.107	947.756	1376.89	941.659	681.882	265366	511.236								Q4/2000	344	1376.89	1376.89	116.496	116.498	-0.00277156	-2.6039	Q4/2000	-2.6038	-2.4405	-2.6039	0.000104476	0.163404	1376.89
Q1/2001	2001-03-31	8319.4	960.189	956.072	1402.49	943.234	687.427	266477	518.428								Q1/2001	350.43	1402.49	1402.49	118.673	118.664	0.00882039	7.64674	Q1/2001	7.6468	5.6305	7.64674	5.68811e-05	-2.01624	1402.49
Q2/2001	2001-06-30	8340.76	968.136	961.996	1404.37	939.535	688.659	268997	525.288								Q2/2001	350.86	1404.37	1404.37	118.819	118.823	-0.00462663	0.537269	Q2/2001	0.5373	1.0461	0.537269	3.09414e-05	0.508831	1404.37
Q3/2001	2001-09-30	8371.25	984.335	969.892	1406.54	934.624	690.476	268345	532.524								Q3/2001	351.37	1406.54	1406.54	118.991	119.007	-0.0155185	0.619506	Q3/2001	0.6193	0.16	0.619506	-0.00020564	-0.459506	1406.54
Q4/2001	2001-12-31	8499.13	994.334	971.952	1397.14	935.306	699.045	268308	532.072								Q4/2001	349.06	1397.14	1397.14	118.209	118.212	-0.0023828	-2.64683	Q4/2001	-2.6468	-2.4544	-2.64683	3.01179e-05	0.19243	1397.14
Q1/2002	2002-03-31	8524.58	1000.38	975.392	1388.46	937.539	709.688	269231	538.232								Q1/2002	346.89	1388.46	1388.46	117.474	117.477	-0.00300903	-2.46146	Q1/2002	-2.4613	-1.4495	-2.46146	0.000157145	1.01196	1388.46
Q2/2002	2002-06-30	8568.13	1011.63	981.392	1386.72	934.033	718.662	271593	540.404								Q2/2002	346.45	1386.72	1386.72	117.325	117.331	-0.00521694	-0.498899	Q2/2002	-0.4991	-0.5637	-0.498899	-0.000201391	-0.0648014	1386.72
Q3/2002	2002-09-30	8628.04	1020.09	988.884	1393.67	938.175	720.121	272326	544.948								Q3/2002	348.19	1393.67	1393.67	117.915	117.918	-0.00332752	2.0175	Q3/2002	2.0176	0.892	2.0175	9.62679e-05	-1.1255	1393.67
Q4/2002	2002-12-31	8674.35	1025.18	992.492	1401.04	944.52	727.484	271649	547.956								Q4/2002	350.03	1401.04	1401.04	118.538	118.542	-0.00429377	2.13387	Q4/2002	2.1339	2.4412	2.13387	2.76717e-05	0.307328	1401.04
Q1/2003	2003-03-31	8712.53	1031.94	994.916	1394.97	942.986	730.836	272023	546.724								Q1/2003	348.55	1394.97	1394.97	118.037	118.028	0.00850907	-1.72318	Q1/2003	-1.7231	0.0802	-1.72318	7.51117e-05	1.80338	1394.97
Q2/2003	2003-06-30	8809.51	1048.61	993.728	1394.82	944.666	736.841	272036	552.496								Q2/2003	348.48	1394.82	1394.82	118.013	118.016	-0.00301261	-0.0412849	Q2/2003	-0.0415	-0.799	-0.0412849	-0.000215094	-0.757715	1394.82
Q3/2003	2003-09-30	8939.39	1058.74	1003.56	1394.68	948.064	743.329	272097	558.22								Q3/2003	348.44	1394.68	1394.68	117.999	118.004	-0.00429018	-0.0415759	Q3/2003	-0.0415	-1.0398	-0.0415759	7.58533e-05	-0.998224	1394.68
Q4/2003	2003-12-31	9008.82	1059.36	1004.4	1393.67	948.939	744.214	275790	565.844								Q4/2003	348.15	1393.67	1393.67	117.901	117.918	-0.0168735	-0.28993	Q4/2003	-0.2901	0.6052	-0.28993	-0.000169551	0.89513	1393.67
Q1/2004	2004-03-31	9096.42	1071.79	1010.78	1401.87	953.166	753.621	275949	569.268								Q1/2004	350.25	1401.87	1401.87	118.612	118.612	-0.000101552	2.3764	Q1/2004	2.3766	0.6952	2.3764	0.000197358	-1.6812	1401.87
Q2/2004	2004-06-30	9155.47	1081.4	1015.14	1397.82	954.007	756.91	276119	576.064								Q2/2004	349.24	1397.82	1397.82	118.27	118.27	0.00044723	-1.15032	Q2/2004	-1.1505	-0.7602	-1.15032	-0.000184161	0.390116	1397.82
Q3/2004	2004-09-30	9243	1088.11	1017.13	1396.09	955.313	764.082	277837	581.076								Q3/2004	348.8	1396.09	1396.09	118.121	118.123	-0.00167607	-0.495847	Q3/2004	-0.4957	0.1206	-0.495847	0.000147457	0.616447	1396.09
Q4/2004	2004-12-31	9337.84	1095.21	1029.54	1405.49	960.931	770.47	276354	586.504								Q4/2004	351.15	1405.49	1405.49	118.917	118.918	-0.00126577	2.72086	Q4/2004	2.7208	1.5766	2.72086	-5.53926e-05	-1.14426	1405.49
Q1/2005	2005-03-31	9409.22	1107.52	1036.39	1406.5	957.637	781.447	277240	591.996								Q1/2005	351.4	1406.5	1406.5	119.002	119.004	-0.00231305	0.28861	Q1/2005	0.2885	-1.0864	0.28861	-0.000110071	-1.37501	1406.5
Q2/2005	2005-06-30	9511.45	1114.91	1040.49	1406.21	965.842	788.275	279048	599.452								Q2/2005	351.3	1406.21	1406.21	118.968	118.979	-0.0116412	-0.0824486	Q2/2005	-0.0822	0.886	-0.0824486	0.000248606	0.968449	1406.21
Q3/2005	2005-09-30	9585.23	1117.55	1046.4	1408.82	973.334	793.684	281722	603.24								Q3/2005	351.98	1408.82	1408.82	119.198	119.2	-0.00168324	0.742773	Q3/2005	0.7426	1.1262	0.742773	-0.000173351	0.383427	1408.82
Q4/2005	2005-12-31	9621.34	1127.63	1052.79	1410.26	975.008	801.287	281915	610.752								Q4/2005	352.34	1410.26	1410.26	119.32	119.322	-0.00211508	0.41119	Q4/2005	0.4113	-0.3191	0.41119	0.000109959	-0.73029	1410.26
Q1/2006	2006-03-31	9729.23	1125.32	1063.01	1420.57	978.337	812.438	282682	616.044								Q1/2006	354.95	1420.57	1420.57	120.204	120.194	0.00994153	2.95476	Q1/2006	2.9549	3.2774	2.95476	0.000135717	0.322636	1420.57
Q2/2006	2006-06-30	9781.02	1134.57	1068.11	1425.77	977.946	819.608	283032	622.084								Q2/2006	356.21	1425.77	1425.77	120.631	120.634	-0.00392297	1.47426	Q2/2006	1.4742	1.2749	1.47426	-5.71467e-05	-0.199357	1425.77
Q3/2006	2006-09-30	9838.11	1141.38	1068.68	1426.06	982.896	828.189	281134	625.612								Q3/2006	356.28	1426.06	1426.06	120.654	120.659	-0.00466971	0.0811035	Q3/2006	0.0812	-0.1185	0.0811035	9.65197e-05	-0.199603	1426.06
Q4/2006	2006-12-31	9938.41	1140.18	1074.78	1447.9	987.772	836.493	284660	633.048								Q4/2006	361.74	1447.9	1447.9	122.503	122.507	-0.00351983	6.26813	Q4/2006	6.2679	6.3534	6.26813	-0.000230922	0.0852691	1447.9
Q1/2007	2007-03-31	9990.66	1151.39	1082.81	1419.77	991.845	843.11	285179	636.912								Q1/2007	354.73	1419.77	1419.77	120.129	120.127	0.00270336	-7.54795	Q1/2007	-7.5478	-8.613	-7.54795	0.000152792	-1.06505	1419.77
Q2/2007	2007-06-30	10024.6	1158.69	1091.22	1432.06	995.486	855.633	286995	642.696								Q2/2007	357.8	1432.06	1432.06	121.169	121.167	0.00224997	3.50862	Q2/2007	3.5086	3.9189	3.50862	-1.67731e-05	0.410283	1432.06
Q3/2007	2007-09-30	10069.2	1173.97	1100.82	1434.81	993.3	863.444	284623	645.448								Q3/2007	358.49	1434.81	1434.81	121.403	121.399	0.0034106	0.769776	Q3/2007	0.7698	1.2282	0.769776	2.43852e-05	0.458424	1434.81
Q4/2007	2007-12-31	10081.8	1175.44	1103.95	1434.96	992.931	879.208	285299	653.22								Q4/2007	358.52	1434.96	1434.96	121.413	121.412	0.00130168	0.0404295	Q4/2007	0.0403	-0.1179	0.0404295	-0.000129542	-0.15833	1434.96
Q1/2008	2008-03-31	10061	1174.9	1099.56	1437.02	991.166	886.713	286639	655.028								Q1/2008	358.99	1437.02	1437.02	121.572	121.586	-0.0139137	0.575751	Q1/2008	0.5758	0.8285	0.575751	4.90855e-05	0.252749	1437.02
Q2/2008	2008-06-30	10077.9	1167.83	1100.78	1436.3	985.947	888.46	283146	645.576								Q2/2008	358.81	1436.3	1436.3	121.511	121.525	-0.0136978	-0.201098	Q2/2008	-0.2011	0.0785	-0.201098	-1.74133e-06	0.279598	1436.3
Q3/2008	2008-09-30	10005.1	1154.99	1099.04	1438.32	978.983	889.205	282123	632.532								Q3/2008	359.35	1438.32	1438.32	121.694	121.696	-0.00207714	0.564865	Q3/2008	0.5651	0.5505	0.564865	0.000234901	-0.0143651	1438.32
Q4/2008	2008-12-31	9884.72	1138.48	1096.14	1439.19	974.555	878.766	278587	628.284								Q4/2008	359.61	1439.19	1439.19	121.782	121.769	0.0125305	0.241612	Q4/2008	0.2415	-0.1567	0.241612	-0.000111506	-0.398312	1439.19
Q1/2009	2009-03-31	9850.83	1129.13	1095.19	1447.61	964.827	875.637	276834	623.624								Q1/2009	361.67	1447.61	1447.61	122.48	122.482	-0.00268848	2.36224	Q1/2009	2.3622	2.0941	2.36224	-4.17546e-05	-0.268142	1447.61
Q2/2009	2009-06-30	9806.38	1115.5	1100.42	1449.06	964.132	882.134	279910	613.048								Q2/2009	362.03	1449.06	1449.06	122.602	122.605	-0.00312032	0.400154	Q2/2009	0.4003	0.508	0.400154	0.00014636	0.107846	1449.06
Q3/2009	2009-09-30	9865.86	1121.64	1101.56	1432.43	967.359	890.434	281846	615.648								Q3/2009	357.91	1432.43	1432.43	121.206	121.197	0.00887271	-4.51268	Q3/2009	-4.5128	-3.08	-4.51268	-0.000120281	1.43268	1432.43
Q4/2009	2009-12-31	9864.81	1129.59	1110.75	1436.77	973.619	895.997	283926	616.504								Q4/2009	358.99	1436.77	1436.77	121.572	121.565	0.00749257	1.21717	Q4/2009	1.2171	1.2226	1.21717	-6.72156e-05	0.00543278	1436.77
Q1/2010	2010-03-31	9917.69	1119.98	1115.37	1435.68	973.576	906.035	284519	618.196								Q1/2010	358.67	1435.68	1435.68	121.464	121.473	-0.00907375	-0.301725	Q1/2010	-0.3015	0.7064	-0.301725	0.000225496	1.00813	1435.68
Q2/2010	2010-06-30	9998.39	1137.12	1118.58	1443.92	974.484	913.706	286824	621.408								Q2/2010	360.76	1443.92	1443.92	122.171	122.17	0.00118115	2.31675	Q2/2010	2.3166	3.0425	2.31675	-0.000150417	0.72575	1443.92
Q3/2010	2010-09-30	10063.1	1137.9	1123.54	1445.66	981.915	921.116	290925	617.74								Q3/2010	361.23	1445.66	1445.66	122.331	122.317	0.0135486	0.481502	Q3/2010	0.4816	1.2467	0.481502	9.83045e-05	0.765198	1445.66
Q4/2010	2010-12-31	10166.1	1129.9	1130.15	1456.36	986.816	929.92	287193	617.676								Q4/2010	363.87	1456.36	1456.36	123.225	123.223	0.00200534	2.99447	Q4/2010	2.9942	3.0496	2.99447	-0.000267697	0.0551323	1456.36
Q1/2011	2011-03-31	10217.1	1126.05	1136.53	1462.47	985.022	931.946	281470	610.056								Q1/2011	365.39	1462.47	1462.47	123.739	123.74	-0.000212844	1.68874	Q1/2011	1.689	5.0821	1.68874	0.000255481	3.39336	1462.47
Q2/2011	2011-06-30	10237.7	1119.12	1123.24	1453.51	985.51	936.344	284616	607.104								Q2/2011	363.11	1453.51	1453.51	122.967	122.981	-0.0136383	-2.4301	Q2/2011	-2.4301	-3.0715	-2.4301	-4.5996e-06	-0.641405	1453.51
Q3/2011	2011-09-30	10282.2	1119.87	1125.18	1470.72	980.4	940.433	288802	604.204								Q3/2011	367.45	1470.72	1470.72	124.437	124.437	-0.000117446	4.82121	Q3/2011	4.8211	5.6541	4.82121	-0.000105105	0.832895	1470.72
Q4/2011	2011-12-31	10316.8	1127.36	1121.87	1472.16	964.242	946.173	290131	595.4								Q4/2011	367.81	1472.16	1472.16	124.559	124.559	-0.000549289	0.393858	Q4/2011	0.3939	0.3772	0.393858	4.17848e-05	-0.0166582	1472.16
Q1/2012	2012-03-31	10379	1136.58	1126.05	1480.01	950.306	951.372	291372	592.8								Q1/2012	369.76	1480.01	1480.01	125.219	125.223	-0.00403067	2.14893	Q1/2012	2.1489	-0.0282	2.14893	-3.38656e-05	-2.17713	1480.01
Q2/2012	2012-06-30	10396.6	1139.86	1123.39	1483.34	943.995	952.879	292199	587.932								Q2/2012	370.52	1483.34	1483.34	125.477	125.505	-0.0281537	0.902221	Q2/2012	0.9021	0	0.902221	-0.000120872	-0.902221	1483.34
Q3/2012	2012-09-30	10424.1	1141.49	1122.7	1487.53	936.142	958.648	291829	581.84								Q3/2012	371.68	1487.53	1487.53	125.869	125.86	0.00982665	1.13577	Q3/2012	1.1358	1.134	1.13577	2.93739e-05	-0.00177063	1487.53
Q4/2012	2012-12-31	10453.2	1146.62	1124.93	1485.5	929.929	963.897	292852	569.192								Q4/2012	371.17	1485.5	1485.5	125.697	125.688	0.0084501	-0.543416	Q4/2012	-0.5434	0.2254	-0.543416	1.62959e-05	0.768816	1485.5
Q1/2013	2013-03-31	10502.3	1155.17	1126.53	1486.34	919.714	970.193	296529	564.108								Q1/2013	371.31	1486.34	1486.34	125.744	125.759	-0.0145343	0.22422	Q1/2013	0.2241	1.0828	0.22422	-0.000119993	0.85858	1486.34
Q2/2013	2013-06-30	10523.9	1155.06	1130.35	1496.17	915.049	978.629	299218	563.064								Q2/2013	373.74	1496.17	1496.17	126.567	126.591	-0.0236681	2.67289	Q2/2013	2.6731	2.4921	2.67289	0.000211019	-0.180789	1496.17
Q3/2013	2013-09-30	10573.1	1164.45	1129.13	1505.28	916.064	985.417	300245	564.264								Q3/2013	376.12	1505.28	1505.28	127.373	127.362	0.011354	2.45843	Q3/2013	2.4583	0.7831	2.45843	-0.000131748	-1.67533	1505.28
Q4/2013	2013-12-31	10662.2	1169.05	1137.38	1494.58	917.474	991.445	299931	567.752								Q4/2013	373.48	1494.58	1494.58	126.479	126.456	0.0228126	-2.81367	Q4/2013	-2.8138	-0.2965	-2.81367	-0.000132108	2.51717	1494.58
Q1/2014	2014-03-31	10713.4	1176.43	1131.34	1503.69	915.968	994.557	305958	567.94								Q1/2014	375.61	1503.69	1503.69	127.2	127.227	-0.0267433	2.4608	Q1/2014	2.461	1.8	2.4608	0.000201529	-0.660798	1503.69
Q2/2014	2014-06-30	10805.1	1179.82	1137.89	1504.85	917.694	1004.13	291862	572.18								Q2/2014	375.83	1504.85	1504.85	127.275	127.325	-0.0501339	0.308131	Q2/2014	0.3081	1.9	0.308131	-3.14042e-05	1.59187	1504.85
Q3/2014	2014-09-30	10909.9	1194.56	1143.62	1513.96	919.585	1011.37	293263	575.056								Q3/2014	378.29	1513.96	1513.96	128.108	128.096	0.0119802	2.44413	Q3/2014	2.444	2	2.44413	-0.000126091	-0.444126	1513.96
Q4/2014	2014-12-31	11045.2	1191.59	1146.52	1522.06	924.04	1018.42	294589	578.612								Q4/2014	380.42	1522.06	1522.06	128.829	128.781	0.0480496	2.15705	Q4/2014	2.1571	2	2.15705	4.93369e-05	-0.157051	1522.06
Q1/2015	2015-03-31	11145.3	1202.74	1151.05	1525.38	927.302	1020.1	296603	583.876								Q1/2015	381.03	1525.38	1525.38	129.036	129.063	-0.0267863	0.876948	Q1/2015	0.877	2	0.876948	5.16445e-05	1.12305	1525.38
Q2/2015	2015-06-30	11227.9	1210.91	1152.74	1529.58	934.308	1024.84	296047	587.52								Q2/2015	381.97	1529.58	1529.58	129.354	129.418	-0.0633091	1.10433	Q2/2015	1.1044	2	1.10433	6.80074e-05	0.895668	1529.58
Q3/2015	2015-09-30	11304.6	1222.33	1157.7	1538.84	941.096	1032.14	297275	594.412								Q3/2015	384.47	1538.84	1538.84	130.201	130.201	0.000167191	2.4426	Q3/2015	2.4426	2.1	2.4426	4.68809e-06	-0.342595	1538.84
Q4/2015	2015-12-31	11379.3	1227.74	1160.26	1547.8	944.4	1038.57	295364	597.124								Q4/2015	386.92	1547.8	1547.8	131.031	130.959	0.0711632	2.35131	Q4/2015	2.3513	2.1	2.35131	-6.7504e-06	-0.251307	1547.8
Q1/2016	2016-03-31	11430.5	1236.36	1175.46	1556.77	946.107	1042.55	296502	602.908								Q1/2016	388.84	1556.77	1556.77	131.681	131.718	-0.0373254	2.33757	Q1/2016	2.3376
Q2/2016	2016-06-30	11537.7	1249.04	1179.27	1559.23	948.32	1047.63	295643	606.576								Q2/2016	389.24	1559.23	1559.23	131.816	131.926	-0.109921	0.63332	Q2/2016	0.6332
Q3/2016	2016-09-30	11618.1	1259.06	1177.23	1565.16	951.127	1055.45	296875	611.208								Q3/2016	391.04	1565.16	1565.16	132.426	132.428	-0.00208739	1.52997	Q3/2016	1.5299
Q4/2016	2016-12-31	11702.1	1262.48	1185.7	1574.99	954.332	1064.27	297004	613.548								Q4/2016	393.93	1574.99	1574.99	133.404	133.26	0.144558	2.53701	Q4/2016	2.5372
Q1/2017	2017-03-31	11758	1267.27	1188.01	1587.68	959.752	1072.9	298553	616.272								Q1/2017	396.03	1587.68	1587.68	134.116	134.334	-0.218145	3.26255	Q1/2017	3.2623
Q2/2017	2017-06-30	11853	1270.6	1191.8	1602	961.036	1085.07	300729	621.272								Q2/2017	399.07	1602	1602	135.145	135.545	-0.400009	3.6561	Q2/2017	3.6563
Q3/2017	2017-09-30	11916.6	1274.32	1198.03	1598.82	964.982	1094.95	298757	625.608								Q3/2017	399.25	1598.82	1598.82	135.206	135.276	-0.0699077	-0.791894	Q3/2017	-0.7921
Q4/2017	2017-12-31	12035.2	1277.52	1200.72	1598.96	965.768	1100.69	299463	629.092								Q4/2017	399.5	1598.96	1598.96	135.291	135.288	0.00257103	0.0360314	Q4/2017	0.0362
Q1/2018	2018-03-31	12066.8	1279.91	1202.61	1603.76	968.568	1106.42	299459	632.615								Q1/2018	401.27	1603.76	1603.76	135.89	135.694	0.196108	1.20544	Q1/2018	1.2054
Q2/2018	2018-06-30	12150.4	1284.39	1205.31	1609.74	970.74	1111.92	300901	636.031								Q2/2018		1609.74	1609.74		136.2		1.50011	Q2/2018	1.5
Q3/2018	2018-09-30	12222.7	1288.63	1210.37	1616.14	972.917	1117.16	302172	639.338								Q3/2018		1616.14	1616.14		136.742		1.60008	Q3/2018	1.6
Q4/2018	2018-12-31	12292.4	1290.95	1215.36	1622.57	975.099	1122.15	302887	642.354								Q4/2018		1622.57	1622.57		137.285		1.59996	Q4/2018	1.6
Q1/2019	2019-03-31	12359.4	1292.5	1220.2	1629.02	976.072	1127.17	303415	645.067								Q1/2019		1629.02	1629.02		137.831		1.59983	Q1/2019	1.6
Q2/2019	2019-06-30	12423.8	1294.05	1224.96	1635.5	977.047	1132.21	303915	647.695								Q2/2019		1635.5	1635.5		138.379		1.60016	Q2/2019	1.6
Q3/2019	2019-09-30	12487	1295.61	1229.74	1641.6	978.023	1137.27	306762	650.286								Q3/2019		1641.6	1641.6		138.895		1.50002	Q3/2019	1.5
Q4/2019	2019-12-31	12549	1297.16	1234.54	1647.31	978.999	1142.35	302566	652.775								Q4/2019		1647.31	1647.31		139.379		1.39984	Q4/2019	1.4

## Sheet: I
Q1/1960 !Q mag=bil	.excel_last	Q111isc@OUTLOOK	Q112ISC@OUTLOOK	Q132isc@OUTLOOK	Q134ISC@OUTLOOK	Q136isc@OUTLOOK	Q156isc@OUTLOOK	Q158isc@OUTLOOK	Q184isc@OUTLOOK					S134NFBC@G10	(J112GCFT@EUDATA) - historical
.DESC		United States: Gross Capital Formation, Total, Volume(SAAR,Bil.Chn.2009.US$)	United Kingdom: Gross Capital Formation, Total, Volume(SAAR,Bil.Chn.2015.Pound)	France: Gross Capital Formation, Total, Volume(SAAR,Bil.Chn.2010.Euro)	Germany: Gross Capital Formation, Total, Volume(SAAR,Bil.Chn.2010.Euro)	Italy: Gross Capital Formation, Total, Volume(SAAR,Bil.Ch.2010.Euro)	Canada: Gross Capital Formation, Total, Volume(SAAR,Bil.Chn.2007.C$)	Japan: Gross Capital Formation, Total, Volume(SAAR,Bil.Chn.2011.Yen)	Spain: Gross Capital Formation, Total, Volume(SAAR,Bil.Chn.2010.Euro)					Germany: GDP: Gross Capital Formation (SWDA, Bil.Chained.2010.Euros)	UK: Gross Capital Formation (SWDA, Bil.Ch.05.GBP)
.T1		Q1-1960	Q1-1960	Q1-1960	Q1-1991	Q1-1960	Q1-1961	Q1-1960	Q1-1960					Q1-1991	Q1-1963
.TN		Q4-2019	Q4-2019	Q4-2019	Q4-2019	Q4-2019	Q4-2019	Q4-2019	Q4-2019					Q1-2018	Q4-2013
.LSOURCE		Organization for Economic Cooperation & Development	Organization for Economic Cooperation & Development	Organization for Economic Cooperation & Development	Organization for Economic Cooperation & Development	Organization for Economic Cooperation & Development	Organization for Economic Cooperation & Development	Organization for Economic Cooperation & Development	Organization for Economic Cooperation & Development					Deutsche Bundesbank	Statistical Office of the European Communities
.DTLM		May-30-2018 07:53	May-30-2018 07:53	May-30-2018 07:53	May-30-2018 07:53	May-30-2018 07:53	May-30-2018 07:53	May-30-2018 07:53	May-30-2018 07:53					May-24-2018 01:20	Mar-31-2014 18:46
Q1/1960	1960-03-31	482.693	72.9127	97.8849	#N/A	99.0559	#N/A	12723	29.8225					#N/A	#N/A
Q2/1960	1960-06-30	428.8	72.314	104.384	#N/A	99.9882	#N/A	12784	31.0933					#N/A	#N/A
Q3/1960	1960-09-30	429.866	75.7264	109.34	#N/A	103.304	#N/A	13736	32.6514					#N/A	#N/A
Q4/1960	1960-12-31	370.19	76.9272	109.04	#N/A	99.6474	#N/A	14801	34.7151					#N/A	#N/A
Q1/1961	1961-03-31	403.115	77.014	107.445	#N/A	108.333	55.1376	15876	37.2843					#N/A	#N/A
Q2/1961	1961-06-30	419.032	77.6543	106.981	#N/A	112.52	56.9329	16362	39.6129					#N/A	#N/A
Q3/1961	1961-09-30	461.887	73.0817	107.354	#N/A	116.645	53.9106	17131	41.7011					#N/A	#N/A
Q4/1961	1961-12-31	476.466	71.9704	111.77	#N/A	119.393	59.8663	18960	43.7087					#N/A	#N/A
Q1/1962	1962-03-31	500.709	71.2021	112.722	#N/A	124.279	61.6876	18545	45.6357					#N/A	#N/A
Q2/1962	1962-06-30	492.836	70.2878	112.879	#N/A	124.67	58.82	18434	47.2686					#N/A	#N/A
Q3/1962	1962-09-30	497.675	74.2433	117.915	#N/A	121.42	65.6672	18590	48.6074					#N/A	#N/A
Q4/1962	1962-12-31	480.708	69.0589	119.343	#N/A	122.703	63.6131	18669	49.6174					#N/A	#N/A
Q1/1963	1963-03-31	501.431	63.8896	110.295	#N/A	116.163	63.6637	19033	50.2984					#N/A	7.8737
Q2/1963	1963-06-30	516.103	75.7182	123.275	#N/A	126.977	63.7076	19967	51.073					#N/A	10.9255
Q3/1963	1963-09-30	533.353	76.1996	132.441	#N/A	133.045	65.8343	21127	51.9413					#N/A	11.1949
Q4/1963	1963-12-31	536.061	83.5118	128.815	#N/A	136.904	69.4605	23217	52.8005					#N/A	12.9862
Q1/1964	1964-03-31	563.131	84.4121	133.649	#N/A	137.197	73.5305	23872	53.6505					#N/A	13.7229
Q2/1964	1964-06-30	563.006	90.3888	139.225	#N/A	123.531	70.8902	24033	54.6853					#N/A	15.0478
Q3/1964	1964-09-30	578.58	91.1134	139.751	#N/A	114.935	71.79	24456	55.9047					#N/A	15.2139
Q4/1964	1964-12-31	590.917	93.6192	141.252	#N/A	107.684	73.2279	24869	57.2926					#N/A	15.894
Q1/1965	1965-03-31	641.313	93.3027	142.308	#N/A	112.111	84.4682	24592	58.8488					#N/A	15.8764
Q2/1965	1965-06-30	650.107	87.817	143.293	#N/A	116.385	82.703	25266	60.4776					#N/A	14.3412
Q3/1965	1965-09-30	668.924	89.744	144.63	#N/A	118.516	83.0166	25749	62.1788					#N/A	15.1627
Q4/1965	1965-12-31	665.813	90.7067	151.337	#N/A	120.319	86.621	25760	64.1134					#N/A	15.5434
Q1/1966	1966-03-31	732.442	89.6617	153.823	#N/A	120.837	90.7115	26041	66.2814					#N/A	15.5752
Q2/1966	1966-06-30	705.861	86.9455	155.922	#N/A	120.308	97.2108	29003	67.8133					#N/A	14.8535
Q3/1966	1966-09-30	701.274	90.1558	161.058	#N/A	130.744	90.4499	30144	68.7094					#N/A	15.7527
Q4/1966	1966-12-31	712.797	82.9262	160.272	#N/A	125.561	91.3921	30066	68.9042					#N/A	13.6098
Q1/1967	1967-03-31	685	86.5083	164.047	#N/A	129.174	87.318	31842	68.3978					#N/A	14.6707
Q2/1967	1967-06-30	647.539	90.7368	164.906	#N/A	138.997	86.1389	33269	68.451					#N/A	15.856
Q3/1967	1967-09-30	668.448	87.8339	167.73	#N/A	142.482	87.6549	35448	69.0639					#N/A	14.8959
Q4/1967	1967-12-31	682.172	90.9072	169.96	#N/A	145.427	83.2878	37485	69.9836					#N/A	15.5566
Q1/1968	1968-03-31	685.292	93.5797	185.151	#N/A	136.542	85.0625	38999	71.2101					#N/A	15.4692
Q2/1968	1968-06-30	719.037	101.165	153.68	#N/A	143.766	87.8781	40236	72.9997					#N/A	17.3232
Q3/1968	1968-09-30	698.672	103.518	181.632	#N/A	154.513	89.227	41189	75.3523					#N/A	17.7269
Q4/1968	1968-12-31	697.135	104.93	183.495	#N/A	161.761	92.3781	46421	78.5884					#N/A	18.1747
Q1/1969	1969-03-31	743.963	105.68	190.592	#N/A	166.713	93.9201	45262	82.708					#N/A	18.8557
Q2/1969	1969-06-30	735.248	105.18	195.069	#N/A	171.444	95.8455	46848	85.5321					#N/A	18.8398
Q3/1969	1969-09-30	749.198	105.361	196.119	#N/A	171.91	97.5764	49795	87.0608					#N/A	18.9281
Q4/1969	1969-12-31	691.904	105.321	204.566	#N/A	152.971	99.3033	53092	87.4187					#N/A	18.9679
Q1/1970	1970-03-31	679.425	100.551	204.715	#N/A	170.785	93.8132	56472	87.5745					#N/A	17.4513
Q2/1970	1970-06-30	683.902	107.281	210.385	#N/A	173.425	90.9621	58116	86.3257					#N/A	19.2426
Q3/1970	1970-09-30	698.597	109.682	214.933	#N/A	186.124	94.8499	59208	85.303					#N/A	19.777
Q4/1970	1970-12-31	656.251	111.191	211.392	#N/A	179.305	87.155	58705	84.5202					#N/A	19.7664
Q1/1971	1971-03-31	726.296	109.706	214.928	#N/A	169.677	87.685	58837	81.7629					#N/A	18.9652
Q2/1971	1971-06-30	748.277	108.105	215.241	#N/A	163.166	92.5082	58714	82.9311					#N/A	17.6756
Q3/1971	1971-09-30	763.073	109.773	218.942	#N/A	168.056	98.52	58471	84.2775					#N/A	17.5219
Q4/1971	1971-12-31	723.855	111.58	219.594	#N/A	162.357	101.998	58702	86.9871					#N/A	17.7852
Q1/1972	1972-03-31	780.647	108.635	224.618	#N/A	164.363	97.8558	63014	90.1979					#N/A	17.0759
Q2/1972	1972-06-30	827.443	115.027	225.722	#N/A	166.073	101.882	62978	94.8736					#N/A	18.6411
Q3/1972	1972-09-30	837.42	114.218	227.193	#N/A	174.795	102.908	64974	98.3539					#N/A	18.483
Q4/1972	1972-12-31	857.047	114.389	235.55	#N/A	173.004	100.87	66588	101.11					#N/A	18.5598
Q1/1973	1973-03-31	927.447	128.675	238.019	#N/A	174.02	107.382	71360	103.733					#N/A	22.365
Q2/1973	1973-06-30	970.816	129.345	245.279	#N/A	180.028	108.729	74090	106.421					#N/A	23.0072
Q3/1973	1973-09-30	926.706	120.222	257.561	#N/A	198.12	116.184	72068	108.703					#N/A	20.8917
Q4/1973	1973-12-31	974.201	120.904	252.393	#N/A	215.692	121.429	70656	112.054					#N/A	21.5718
Q1/1974	1974-03-31	921.918	108.5	264.065	#N/A	218.149	124.138	71279	116.404					#N/A	18.6764
Q2/1974	1974-06-30	930.446	112.142	264.183	#N/A	216.354	127.078	67759	119.362					#N/A	20.2451
Q3/1974	1974-09-30	860.725	109.614	268.216	#N/A	214.141	122.562	66405	119.955					#N/A	19.9634
Q4/1974	1974-12-31	869.324	99.8764	242.751	#N/A	193.933	129.998	64709	118.25					#N/A	17.7233
Q1/1975	1975-03-31	730.265	93.4633	230.395	#N/A	169.767	127.285	61225	115.268					#N/A	15.9603
Q2/1975	1975-06-30	688.457	85.6807	222.541	#N/A	170.506	123.483	63929	113.1					#N/A	14.0524
Q3/1975	1975-09-30	752.83	90.2411	213.256	#N/A	176.827	125.14	65237	112.425					#N/A	15.6794
Q4/1975	1975-12-31	792.054	91.0445	223.36	#N/A	176.469	126.897	65471	111.521					#N/A	15.7721
Q1/1976	1976-03-31	874.467	95.5342	229.018	#N/A	182.849	134.321	66518	111.314					#N/A	16.8895
Q2/1976	1976-06-30	890.937	94.0943	237.654	#N/A	190.521	136.341	66203	112.302					#N/A	15.6582
Q3/1976	1976-09-30	891.048	99.3461	243.137	#N/A	196.301	135.058	67157	112.535					#N/A	16.5848
Q4/1976	1976-12-31	888.244	108.942	240.578	#N/A	209.185	130.64	65509	111.663					#N/A	18.8751
Q1/1977	1977-03-31	928.105	115.081	248.227	#N/A	201.19	135.062	67929	110.722					#N/A	20.761
Q2/1977	1977-06-30	1010.49	111.555	246.003	#N/A	187.62	135.734	67534	108.309					#N/A	20.2398
Q3/1977	1977-09-30	1064.51	107.425	241.635	#N/A	172.026	134.038	67933	106.288					#N/A	19.0006
Q4/1977	1977-12-31	1018.18	114.22	242.164	#N/A	169.684	133.426	69833	105.812					#N/A	20.3971
Q1/1978	1978-03-31	1028.62	115.614	245.354	#N/A	172.488	129.801	70737	104.723					#N/A	20.2681
Q2/1978	1978-06-30	1150.66	119.587	244.791	#N/A	185.339	132.781	73122	102.478					#N/A	20.8979
Q3/1978	1978-09-30	1194.72	119.716	246.463	#N/A	187.997	136.29	74182	100.629					#N/A	20.3829
Q4/1978	1978-12-31	1236.49	121.534	249.469	#N/A	204.404	141.676	75962	99.6633					#N/A	20.2822
Q1/1979	1979-03-31	1219.36	128.033	253.083	#N/A	188.826	144.425	77080	98.6414					#N/A	22.0259
Q2/1979	1979-06-30	1228.49	123.414	254.383	#N/A	202.426	156.047	78022	98.8979					#N/A	19.9802
Q3/1979	1979-09-30	1235.43	128.643	265.677	#N/A	200.806	154.411	78661	99.8628					#N/A	21.624
Q4/1979	1979-12-31	1216.01	129.905	263.105	#N/A	214.407	160.116	78431	101.22					#N/A	21.7653
Q1/1980	1980-03-31	1219.02	117.934	270.363	#N/A	214.737	152.154	76034	104.674					#N/A	18.5271
Q2/1980	1980-06-30	1117.37	116.22	266.949	#N/A	218.737	153.825	76002	101.087					#N/A	18.5413
Q3/1980	1980-09-30	1045.99	105.446	266.991	#N/A	222.517	140.174	77698	102.744					#N/A	15.0929
Q4/1980	1980-12-31	1141.06	103.181	257.245	#N/A	217.647	148.278	79212	100.49					#N/A	14.2423
Q1/1981	1981-03-31	1255.73	94.3749	253.112	#N/A	211.142	163.587	80073	95.8382					#N/A	11.8688
Q2/1981	1981-06-30	1187.58	96.3688	239.636	#N/A	203.214	176.975	80856	95.5978					#N/A	12.3732
Q3/1981	1981-09-30	1251.37	106.069	241.476	#N/A	184.585	165.153	78057	91.0307					#N/A	15.3534
Q4/1981	1981-12-31	1201.28	106.28	247.936	#N/A	198.922	152.299	79044	91.3166					#N/A	15.6759
Q1/1982	1982-03-31	1054.16	113.113	251.136	#N/A	204.736	144.371	81028	91.9012					#N/A	16.4805
Q2/1982	1982-06-30	1067.43	117.26	260.272	#N/A	194.714	127.481	78838	97.6183					#N/A	18.1155
Q3/1982	1982-09-30	1027.85	108.866	256.916	#N/A	198.443	118.366	79570	95.0326					#N/A	16.3807
Q4/1982	1982-12-31	938.497	106.053	242.6	#N/A	184.166	121.976	78348	94.6883					#N/A	15.1794
Q1/1983	1983-03-31	975.049	117.239	247.612	#N/A	182.075	132.387	76833	94.6688					#N/A	18.0696
Q2/1983	1983-06-30	1063.26	121.988	235.796	#N/A	181.865	132.567	76778	92.4275					#N/A	18.1455
Q3/1983	1983-09-30	1132.12	119.968	235.46	#N/A	188.887	142.249	76953	90.4655					#N/A	18.3734
Q4/1983	1983-12-31	1260.45	132.444	233.232	#N/A	204.82	146.547	79325	93.3045					#N/A	20.42
Q1/1984	1984-03-31	1390.92	128.858	241.12	#N/A	202.637	152.099	79982	89.8678					#N/A	20.3441
Q2/1984	1984-06-30	1436.51	133.983	237.94	#N/A	204.708	156.986	81518	87.7369					#N/A	20.7901
Q3/1984	1984-09-30	1470.53	132.291	233.684	#N/A	214.052	153.669	83226	91.7843					#N/A	20.8679
Q4/1984	1984-12-31	1455.82	137.289	241.48	#N/A	210.886	151.249	81974	95.0456					#N/A	21.7467
Q1/1985	1985-03-31	1416.49	138.78	237.332	#N/A	212.016	158.462	87361	94.6493					#N/A	21.6664
Q2/1985	1985-06-30	1447.85	142.102	238.656	#N/A	215.554	163.949	88497	97.1115					#N/A	23.5054
Q3/1985	1985-09-30	1438.1	132.497	252.464	#N/A	214.474	172.596	91421	94.8247					#N/A	21.6284
Q4/1985	1985-12-31	1480.47	137.998	248.128	#N/A	217.877	171.861	91673	96.5983					#N/A	21.8775
Q1/1986	1986-03-31	1482.25	129.012	252.708	#N/A	217.254	176.503	94662	100.808					#N/A	20.4094
Q2/1986	1986-06-30	1449.7	140.129	261.764	#N/A	220.6	174.295	94170	111.58					#N/A	22.2202
Q3/1986	1986-09-30	1420.42	145.222	266.716	#N/A	226.893	167.428	94345	110.566					#N/A	23.4639
Q4/1986	1986-12-31	1419.23	150.22	261.216	#N/A	231.89	165.336	94366	106.512					#N/A	25.4213
Q1/1987	1987-03-31	1471.3	140.483	269.764	#N/A	230.287	171.183	92484	113.483					#N/A	23.3738
Q2/1987	1987-06-30	1484.62	153.071	273.332	#N/A	245.688	176.774	98449	113.743					#N/A	25.2243
Q3/1987	1987-09-30	1495.91	160.624	274.576	#N/A	229.872	188.362	102836	123.683					#N/A	27.2612
Q4/1987	1987-12-31	1589.92	165.077	277.444	#N/A	246.093	201.865	108874	133.928					#N/A	27.9033
Q1/1988	1988-03-31	1508.58	171.175	292.512	#N/A	248.193	203.523	115423	130.504					#N/A	29.0843
Q2/1988	1988-06-30	1563.91	175.718	295.588	#N/A	244.434	200.845	111730	137.858					#N/A	30.0427
Q3/1988	1988-09-30	1573.44	184.09	304.06	#N/A	254.167	207.689	118477	145.531					#N/A	31.3791
Q4/1988	1988-12-31	1594.31	199.761	310.852	#N/A	261.541	203.651	119660	142.906					#N/A	33.8364
Q1/1989	1989-03-31	1658.47	192.42	316.18	#N/A	269.674	207.883	125775	152.742					#N/A	33.0043
Q2/1989	1989-06-30	1651.66	194.345	326.744	#N/A	260.573	216.558	123497	152.118					#N/A	33.3082
Q3/1989	1989-09-30	1646.04	192.96	328.88	#N/A	258.702	218.062	125974	158.57					#N/A	32.5609
Q4/1989	1989-12-31	1631.55	178.934	334.588	#N/A	265.859	212.11	132912	157.628					#N/A	30.1787
Q1/1990	1990-03-31	1660.04	187.644	340.604	#N/A	282.489	208.885	130809	162.214					#N/A	32.1944
Q2/1990	1990-06-30	1663.86	189.802	347.332	#N/A	268.906	204.702	134779	166.08					#N/A	32.379
Q3/1990	1990-09-30	1634.18	178.045	341.908	#N/A	271.107	191.795	139390	155.451					#N/A	30.2723
Q4/1990	1990-12-31	1557.53	167.42	333.228	#N/A	271.141	185.636	140392	176.162					#N/A	28.4501
Q1/1991	1991-03-31	1497.95	168.79	334.052	499.423	283.256	189.878	140210	164.813					124.33	29.3687
Q2/1991	1991-06-30	1498.52	157.953	329.932	505.347	281.975	174.35	141683	171.128					125.84	27.4325
Q3/1991	1991-09-30	1527.91	153.499	330.356	499.777	270.652	181.187	140590	167.697					124.4	26.74
Q4/1991	1991-12-31	1573.13	165.458	323.828	493.954	277.639	182.949	139172	165.716					122.97	28.829
Q1/1992	1992-03-31	1555.01	169.535	336.744	511.392	284.038	181.533	135058	165.17					127.4	30.0418
Q2/1992	1992-06-30	1629.47	162.998	326.044	508.861	271.462	176.117	137341	158.979					126.76	28.8361
Q3/1992	1992-09-30	1637.75	163.696	316.212	483.552	271.932	179.192	136238	164.845					120.42	29.0233
Q4/1992	1992-12-31	1674.98	163.638	303.696	474.188	259.558	167.138	132737	155.932					118.09	29.0472
Q1/1993	1993-03-31	1699.23	166.896	294.732	450.975	253.311	171.71	133962	144.524					112.28	29.9278
Q2/1993	1993-06-30	1714.78	171.535	287.112	464.599	243.37	178.263	132974	140.515					115.65	30.7687
Q3/1993	1993-09-30	1708.79	167.859	288.644	474.83	235.382	188.04	129543	142.231					118.18	30.3218
Q4/1993	1993-12-31	1783.53	166.473	284.584	456.85	232.422	189.391	128326	143.16					113.71	30.3333
Q1/1994	1994-03-31	1831.61	170.646	299.972	460.672	249.631	193.911	129994	144.134					114.68	30.9463
Q2/1994	1994-06-30	1926.89	185.09	306.348	467.762	253.649	199.597	126136	147.175					116.44	33.6871
Q3/1994	1994-09-30	1911.92	182.313	314.404	484.372	252.678	198.546	129306	151.495					120.58	33.5688
Q4/1994	1994-12-31	1979.67	192.801	318.668	505.59	266.351	201.458	127554	147.428					125.86	35.7337
Q1/1995	1995-03-31	1990.5	176.375	321.324	483.194	271.23	199.619	129785	157.968					120.3	32.9063
Q2/1995	1995-06-30	1959.8	198.449	314.256	487.094	267.476	202.433	132329	157.26					121.24	35.8044
Q3/1995	1995-09-30	1944.2	194.136	326.56	489.221	276.583	200.143	136808	159.12					121.77	36.2293
Q4/1995	1995-12-31	1983.4	186.843	322.468	480.814	296.104	198.082	137734	160.684					119.68	35.8344
Q1/1996	1996-03-31	2012.6	191.653	313.58	456.7	282.068	195.949	141173	162.808					113.71	37.3546
Q2/1996	1996-06-30	2098.4	191.481	315.68	476.346	268.899	187.644	144935	161.74					118.6	36.8635
Q3/1996	1996-09-30	2181.5	191.677	307.568	473.763	274.488	203.762	143430	162.048					117.95	36.8273
Q4/1996	1996-12-31	2185.8	192.662	308.748	477.966	272.463	220.101	143928	161.988					119.01	36.5596
Q1/1997	1997-03-31	2227.8	197.935	307.66	466.575	276.983	219.5	140479	166.32					116.18	38.4772
Q2/1997	1997-06-30	2326.7	203.303	315.42	476.296	276.683	229.715	140580	169.844					118.61	41.3418
Q3/1997	1997-09-30	2362.4	202.666	322.068	484.295	279.402	238.688	142023	169.932					120.59	41.3294
Q4/1997	1997-12-31	2383.2	207.157	331.336	490.573	301.136	241.588	140499	175.116					122.15	43.1534
Q1/1998	1998-03-31	2469.7	212.775	346.536	500.853	290.292	244.269	136675	182.248					124.7	43.6657
Q2/1998	1998-06-30	2469.7	220.59	348.728	500.296	287.845	236.487	133419	183.964					124.6	46.3942
Q3/1998	1998-09-30	2541.1	215.02	353.056	506.473	290.576	226.072	132062	193.596					126.1	45.927
Q4/1998	1998-12-31	2599.1	230.683	360.812	500.6	294.411	236.848	135392	199.688					124.65	47.3014
Q1/1999	1999-03-31	2664.06	231.984	370.068	518.589	305.867	236.745	128196	202.36					129.12	49.1139
Q2/1999	1999-06-30	2673.17	210.436	377.108	514.538	297.41	245.842	129054	208.288					128.11	43.8336
Q3/1999	1999-09-30	2735.56	224.763	369.688	534.385	302.039	246.33	127934	212.312					133.06	46.6212
Q4/1999	1999-12-31	2813.71	238.844	386.092	534.233	311.333	262.695	127498	216.924					133.03	47.3402
Q1/2000	2000-03-31	2795.3	230.909	397.812	533.738	317.372	265.634	129974	219.816					132.84	47.9497
Q2/2000	2000-06-30	2928.81	232.341	403.8	540.373	329.211	266.427	131401	223.016					134.5	48.1228
Q3/2000	2000-09-30	2901.86	228.629	414.836	545.235	325.518	269.997	130781	226.356					135.7	48.8418
Q4/2000	2000-12-31	2906.03	221.358	424.96	549.743	336.402	266.536	133780	228.612					136.82	46.4172
Q1/2001	2001-03-31	2799.65	224.53	414.544	538.865	329.646	261.485	137166	230.544					134.14	46.6133
Q2/2001	2001-06-30	2814.1	241.877	421.028	538.308	330.291	266.323	131552	234.612					134.05	49.454
Q3/2001	2001-09-30	2754.77	236.889	407.428	515.779	337.374	264.184	126137	236.064					128.47	48.3357
Q4/2001	2001-12-31	2663.16	222.574	409.588	506.869	326.096	248.455	123354	237.012					126.21	45.1232
Q1/2002	2002-03-31	2750.68	232.014	415	487.753	334.322	247.101	121044	239.644					121.42	47.5849
Q2/2002	2002-06-30	2777.53	229.326	404.824	486.942	342.567	267.696	119787	243.792					121.22	46.0082
Q3/2002	2002-09-30	2785.88	229.354	402.472	480.257	345.845	271.448	121310	245.296					119.54	47.3394
Q4/2002	2002-12-31	2786.37	242.426	398.068	466.685	355.733	276.561	122326	250.38					116.16	48.8145
Q1/2003	2003-03-31	2805.79	235.664	408.996	488.004	356.187	286.578	120462	256.548					121.48	48.4382
Q2/2003	2003-06-30	2823.11	233.406	404.924	483.65	354.142	289.267	121772	257.956					120.42	47.1777
Q3/2003	2003-09-30	2915.41	235.71	402.748	474.587	332.704	283.76	122401	262.568					118.17	50.2798
Q4/2003	2003-12-31	2997.52	245.777	411.7	486.029	348.124	294.338	121911	265.924					121.05	52.6842
Q1/2004	2004-03-31	2999.31	238.064	421.952	460.953	355.15	295.508	123835	268.1					114.78	53.5595
Q2/2004	2004-06-30	3094.35	236.71	429.448	452.953	350.777	297.941	122571	272.776					112.77	52.8105
Q3/2004	2004-09-30	3132.19	243.526	438.108	477.966	348.582	322.091	123682	276.512					119.01	51.8203
Q4/2004	2004-12-31	3177.56	235.152	436.64	470.118	355.294	335.662	124579	281.32					117.05	52.6824
Q1/2005	2005-03-31	3250.14	235.851	441.944	431.914	349.14	343.067	125635	285.26					107.53	53.9508
Q2/2005	2005-06-30	3221.33	237.06	440.756	461.89	356.71	340.867	126240	293.548					115.03	53.7432
Q3/2005	2005-09-30	3252.01	247.682	439.544	463.915	354.096	352.336	128167	297.412					115.5	55.3447
Q4/2005	2005-12-31	3335.77	253.273	454.26	488.524	357.098	355.949	126209	300.176					121.63	55.6883
Q1/2006	2006-03-31	3376.71	258.669	448.584	490.118	364.718	369.315	125651	309.572					121.97	58.0449
Q2/2006	2006-06-30	3370.99	252.235	459.444	509.158	369.268	373.065	126348	314.484					126.75	55.6167
Q3/2006	2006-09-30	3339.19	251.066	465.216	517.513	378.201	368.5	125924	318.916					128.83	57.2473
Q4/2006	2006-12-31	3275.41	256.194	476.908	498.878	388.062	359.194	127817	324.676					124.19	59.2895
Q1/2007	2007-03-31	3251.1	265.655	485.26	546.121	391.335	365.315	129231	327.18					135.95	61.4765
Q2/2007	2007-06-30	3298.45	254.98	491.216	528.145	380.234	367.052	126434	330.988					131.48	61.7406
Q3/2007	2007-09-30	3283.59	262.985	492.6	545.361	380.794	383.905	123874	331.512					135.77	64.1697
Q4/2007	2007-12-31	3233.22	262.952	495.932	543.69	375.152	392.468	123482	335.12					135.35	64.3454
Q1/2008	2008-03-31	3145.53	271.726	499.108	554.678	390.905	390.573	122671	330.504					138.12	63.7766
Q2/2008	2008-06-30	3117.34	259.063	494.78	531.841	378.969	385.865	124144	328.784					132.44	61.3308
Q3/2008	2008-09-30	3054.74	236.254	491.68	550.83	365.451	389.588	118760	315.452					137.13	56.7933
Q4/2008	2008-12-31	2835.9	214.323	471.892	530.17	339.286	367.524	123560	302.608					131.96	50.9882
Q1/2009	2009-03-31	2575.75	199.254	436.704	467.202	322.472	328.364	107405	264.332					116.35	45.6796
Q2/2009	2009-06-30	2471.82	208.419	415.312	426.754	303.05	314.642	104123	264.552					106.27	46.5029
Q3/2009	2009-09-30	2459.51	202.939	409.816	453.787	304.286	328.14	98716	265.484					112.96	44.0994
Q4/2009	2009-12-31	2593.5	198.561	431.94	437.992	314.623	343.264	99570	263.62					109.03	43.7549
Q1/2010	2010-03-31	2647.48	224.457	419.82	478.683	322.264	369.467	102097	259.044					119.19	49.0768
Q2/2010	2010-06-30	2767.65	223.422	433.204	516.008	324.933	362.064	104072	257.652					128.44	47.8888
Q3/2010	2010-09-30	2838.97	240.613	447.612	512.361	322.684	382.183	107991	252.624					127.51	51.5915
Q4/2010	2010-12-31	2811.05	237.05	443.94	510.285	341.622	370.675	107615	248.876					127.02	48.7129
Q1/2011	2011-03-31	2747.97	218.517	469.972	548.842	339.621	378.5	107018	243.976					136.62	46.1398
Q2/2011	2011-06-30	2826.71	232.692	470.84	567.883	331.972	378.614	106141	238.184					141.4	51.0766
Q3/2011	2011-09-30	2826.43	251.829	470.08	552.842	323.449	383.621	109323	233.492					137.62	53.6567
Q4/2011	2011-12-31	2981.95	242.936	461.68	541.246	310.11	386.632	110333	229.088					134.73	48.2315
Q1/2012	2012-03-31	3019.64	226.991	459.62	522.978	297.012	391.838	113061	222.172					130.22	48.4664
Q2/2012	2012-06-30	3074.56	262.938	456.932	511.942	279.262	395.354	111762	215.712					127.55	50.5175
Q3/2012	2012-09-30	3055.55	260.593	459.144	500.905	268.893	399.352	112255	210.148					124.68	49.741
Q4/2012	2012-12-31	3021.9	256.237	453.788	501.766	265.735	395.346	111905	206.484					124.9	49.4036
Q1/2013	2013-03-31	3093.77	250.011	450.6	500.058	255.534	427.969	112349	204.224					124.53	47.5805
Q2/2013	2013-06-30	3121.05	269.59	456.836	523.195	258.208	422.425	112990	202.032					130.35	48.568
Q3/2013	2013-09-30	3204.8	287.447	463.624	524.815	264.895	429.65	117528	204.508					130.63	53.1082
Q4/2013	2013-12-31	3233.51	306.995	463.164	518.942	264.707	437.826	120369	204.26					129.13	51.4237
Q1/2014	2014-03-31	3182.51	305.744	469.184	536.299	264.536	435.281	120398	213.692					133.57
Q2/2014	2014-06-30	3289.67	294.236	472.64	536.552	268.972	428.402	120872	215.12					133.7
Q3/2014	2014-09-30	3365.33	308.493	479.908	513.206	268.011	429.833	119120	215.692					127.72
Q4/2014	2014-12-31	3360.46	325.857	472.876	522.119	259.885	439.183	118796	217.656					129.83
Q1/2015	2015-03-31	3441.41	328.359	479.892	530.942	270.086	429.062	123010	228.492					132.27
Q2/2015	2015-06-30	3462.5	308.529	471.784	517.981	269.245	411.545	124104	232.992					129.15
Q3/2015	2015-09-30	3476.86	313.638	485.552	520.614	269.902	395.634	123301	236.1					129.63
Q4/2015	2015-12-31	3423.95	331.726	499.42	532.36	271.464	395.6	122697	239.372					132.34
Q1/2016	2016-03-31	3406.01	325.227	495.172	538.399	271.502	389.04	122732	238.9					134.13
Q2/2016	2016-06-30	3375.29	310.904	482.656	526.6	272.507	393.703	125812	242.46					131.4
Q3/2016	2016-09-30	3384.77	338.325	499.036	540.12	274.376	400.28	123182	240.612					134.45
Q4/2016	2016-12-31	3447.56	317.688	498	549.793	278.456	385.929	122788	243.608					136.45
Q1/2017	2017-03-31	3444.4	326.522	520.856	543.478	271.162	405.777	123969	251.092					136.89
Q2/2017	2017-06-30	3467.96	322.956	513.844	559.071	284.6	412.255	125816	252.312					140.52
Q3/2017	2017-09-30	3514.43	327.429	525.464	569.702	286.049	419.869	127579	256.368					141.98
Q4/2017	2017-12-31	3563.39	337.699	522.68	569.601	284.813	426.084	128146	258.7					141.74
Q1/2018	2018-03-31	3617.97	334.777	525.152	577.476	287.301	428.085	126949	261.812					143.44
Q2/2018	2018-06-30	3667.66	337.572	529.915	583.472	290.949	431.402	128506	264.735
Q3/2018	2018-09-30	3708.22	338.307	534.847	589.48	293.329	434.816	129149	267.691
Q4/2018	2018-12-31	3749.53	338.988	539.794	595.572	295.728	438.269	129214	270.68
Q1/2019	2019-03-31	3790.67	339.593	544.74	601.411	297.93	441.773	129375	273.389
Q2/2019	2019-06-30	3832.51	340.089	549.684	607.346	300.148	445.046	129473	276.046
Q3/2019	2019-09-30	3874.53	340.503	554.635	613.161	302.383	448.188	129281	278.729
Q4/2019	2019-12-31	3917.65	340.92	559.572	619.031	304.634	451.302	128744	281.44

## Sheet: Total GFCF
Q1/1960 !Q mag=bil	.excel_last	Q111ic@OUTLOOK	Q112ic@OUTLOOK	Q132ic@OUTLOOK		Q136ic@OUTLOOK	Q156ic@OUTLOOK	Q158ic@OUTLOOK	Q184ic@OUTLOOK			GERMANY	Q1/1960 !Q mag=bil	S134NFC@G10	Q134IC@OUTLOOK						Q1/1960 !Q	Q134ICP@OUTLOOK					(Q134ICP@OUTLOOK) - historical
.DESC		United States: Gross Fixed Capital Formation, Total, Vol(SAAR,Bil.Chn.2009.US$)	UK: Gross Fixed Capital Formation, Total, Volume(SAAR,Bil.Chn.2015.Pound)	France: Gross Fixed Capital Formation, Total, Volume(SAAR,Bil.Chn.2010.Euro)	Germany: Gross Fixed Capital Formation, Total, Volume(Bil.Ch.2010.EUR)	Italy: Gross Fixed Capital Formation, Total, Volume(SAAR,Bil.Ch.2010.Euro)	Canada: Gross Fixed Capital Formation, Total, Volume(SAAR,Bil.Chn.2007.C$)	Japan: Gross Fixed Capital Formation, Total, Volume(SAAR,Bil.Chn.2011.Yen)	Spain: Gross Fixed Capital Formation, Total, Volume(SAAR,Bil.Chn.2010.Euro)				.DESC	Germany: GDP: Gross Fixed Capital Formation (SWDA, Bil.Chained.2010.Euros)	Germany: Gross Fixed Capital Formation, Total, Volume(SAAR,Bil.Chn.2010.Euro)	Germany: Gross Fixed Capital Formation, Total, Volume(Bil.Ch.2005.EUR)	Comparison				.DESC	Germany: Gross Fixed Capital Formation Growth, Volume (Annualized % Change)	Comparison				Germany: Gross Fixed Capital Formation Growth, Volume(Annualized % Change)
.T1		Q1-1960	Q1-1960	Q1-1960	Q1-1960	Q1-1960	Q1-1961	Q1-1960	Q1-1960				.T1	Q1-1970	Q1-1991	Spliced					.T1	Q2-1991					Q2-1960
.TN		Q4-2019	Q4-2019	Q4-2019	Q4-2019	Q4-2019	Q4-2019	Q4-2019	Q4-2019				.TN	Q1-2018	Q4-2019						.TN	Q4-2019					Q4-2015
.LSOURCE		Organization for Economic Cooperation & Development	Organization for Economic Cooperation & Development	Organization for Economic Cooperation & Development	Organization for Economic Cooperation & Devt	Organization for Economic Cooperation & Development	Organization for Economic Cooperation & Development	Organization for Economic Cooperation & Development	Organization for Economic Cooperation & Development				.LSOURCE	Deutsche Bundesbank/Haver Analytics	Organization for Economic Cooperation & Development				Series Difference	Growth Rate Implied by the Spliced Series	.LSOURCE	Organization for Economic Cooperation & Development				Historical Germany Series	Organization for Economic Cooperation & Devt
.DTLM		May-30-2018 07:53	May-30-2018 07:53	May-30-2018 07:53		May-30-2018 07:53	May-30-2018 07:53	May-30-2018 07:53	May-30-2018 07:53				.DTLM	May-24-2018 01:20	May-30-2018 07:53						.DTLM	May-30-2018 07:53					May-09-2014 15:38
Q1/1960	1960-03-31	557.917	84.244	90.136	195.986	108.849	#N/A	11851	26.657				Q1/1960	#N/A	#N/A	195.986	#N/A	44.7185	#N/A		Q1/1960	#N/A	#N/A	#N/A		193.159	#N/A
Q2/1960	1960-06-30	548.692	86.676	92.564	196.917	113.633	#N/A	11994	27.416				Q2/1960	#N/A	#N/A	196.917	#N/A	44.9309	#N/A	1.9135	Q2/1960	#N/A	#N/A	#N/A		194.076	1.9135
Q3/1960	1960-09-30	544.96	88.284	95.028	198.779	117.192	#N/A	12863	28.376				Q3/1960	#N/A	#N/A	198.779	#N/A	45.3557	#N/A	3.8359	Q3/1960	#N/A	#N/A	#N/A		195.911	3.8359
Q4/1960	1960-12-31	542.866	91.08	97.236	201.902	116.747	#N/A	13633	29.648				Q4/1960	#N/A	#N/A	201.902	#N/A	46.0684	#N/A	6.4352	Q4/1960	#N/A	#N/A	#N/A		198.989	6.4352
Q1/1961	1961-03-31	551.065	93.396	102.376	206.287	122.365	52.611	14582	31.232				Q1/1961	#N/A	#N/A	206.287	#N/A	47.069	#N/A	8.9751	Q1/1961	#N/A	#N/A	#N/A		203.311	8.9751
Q2/1961	1961-06-30	548.883	94.956	103.008	209.95	123.811	53.965	14840	32.591				Q2/1961	#N/A	#N/A	209.95	#N/A	47.9046	#N/A	7.2924	Q2/1961	#N/A	#N/A	#N/A		206.921	7.2924
Q3/1961	1961-09-30	564.535	96.304	105.772	212.889	130.208	55.784	15765	33.724				Q3/1961	#N/A	#N/A	212.889	#N/A	48.5752	#N/A	5.7181	Q3/1961	#N/A	#N/A	#N/A		209.817	5.7181
Q4/1961	1961-12-31	585.184	93.972	107.408	215.503	132.822	55.85	16788	34.678				Q4/1961	#N/A	#N/A	215.503	#N/A	49.1718	#N/A	5.0044	Q4/1961	#N/A	#N/A	#N/A		212.395	5.0044
Q1/1962	1962-03-31	595.329	94.728	109.6	217.794	137.049	56.688	17189	35.452				Q1/1962	#N/A	#N/A	217.794	#N/A	49.6945	#N/A	4.3203	Q1/1962	#N/A	#N/A	#N/A		214.652	4.3203
Q2/1962	1962-06-30	605.194	96.852	110.652	219.351	138.161	56.395	17570	36.309				Q2/1962	#N/A	#N/A	219.351	#N/A	50.0498	#N/A	2.8908	Q2/1962	#N/A	#N/A	#N/A		216.187	2.8908
Q3/1962	1962-09-30	613.204	96.404	113.112	220.175	139.719	58.215	17963	37.248				Q3/1962	#N/A	#N/A	220.175	#N/A	50.2378	#N/A	1.5105	Q3/1962	#N/A	#N/A	#N/A		216.999	1.5105
Q4/1962	1962-12-31	609.454	94.156	112.932	219.657	144.002	57.745	18305	38.202				Q4/1962	#N/A	#N/A	219.657	#N/A	50.1195	#N/A	-0.9381	Q4/1962	#N/A	#N/A	#N/A		216.488	-0.9381
Q1/1963	1963-03-31	611.104	86.988	112.74	217.797	146.282	57.291	18517	39.172				Q1/1963	#N/A	#N/A	217.797	#N/A	49.6951	#N/A	-3.3445	Q1/1963	#N/A	#N/A	#N/A		214.655	-3.3445
Q2/1963	1963-06-30	629.813	98.66	119.58	218.654	150.454	58.525	19385	40.297				Q2/1963	#N/A	#N/A	218.654	#N/A	49.8908	#N/A	1.584	Q2/1963	#N/A	#N/A	#N/A		215.5	1.584
Q3/1963	1963-09-30	652.516	100.72	125.92	222.229	152.734	59.54	20229	41.578				Q3/1963	#N/A	#N/A	222.229	#N/A	50.7064	#N/A	6.7019	Q3/1963	#N/A	#N/A	#N/A		219.023	6.7019
Q4/1963	1963-12-31	661.629	104.732	125.92	228.685	154.625	62.181	21509	42.997				Q4/1963	#N/A	#N/A	228.685	#N/A	52.1795	#N/A	12.1361	Q4/1963	#N/A	#N/A	#N/A		225.386	12.1361
Q1/1964	1964-03-31	681.507	109.992	130.044	238.021	152.845	64.946	22193	44.553				Q1/1964	#N/A	#N/A	238.021	#N/A	54.3098	#N/A	17.3585	Q1/1964	#N/A	#N/A	#N/A		234.588	17.3585
Q2/1964	1964-06-30	681.254	112.944	131.64	245.199	145.336	65.771	22521	46.214				Q2/1964	#N/A	#N/A	245.199	#N/A	55.9476	#N/A	12.6195	Q2/1964	#N/A	#N/A	#N/A		241.662	12.6195
Q3/1964	1964-09-30	689.937	114.656	135.16	250.219	138.05	66.811	23287	47.979				Q3/1964	#N/A	#N/A	250.219	#N/A	57.0929	#N/A	8.4433	Q3/1964	#N/A	#N/A	#N/A		246.609	8.4433
Q4/1964	1964-12-31	694.2	116.848	136.984	253.643	132.711	71.14	24040	49.885				Q4/1964	#N/A	#N/A	253.643	#N/A	57.8742	#N/A	5.5868	Q4/1964	#N/A	#N/A	#N/A		249.984	5.5868
Q1/1965	1965-03-31	713.706	119.004	137.332	255.471	129.54	71.222	23983	51.933				Q1/1965	#N/A	#N/A	255.471	#N/A	58.2913	#N/A	2.9146	Q1/1965	#N/A	#N/A	#N/A		251.786	2.9146
Q2/1965	1965-06-30	730.287	117.416	140.5	257.365	129.596	72.184	23840	53.932				Q2/1965	#N/A	#N/A	257.365	#N/A	58.7236	#N/A	2.9992	Q2/1965	#N/A	#N/A	#N/A		253.653	2.9992
Q3/1965	1965-09-30	753.527	118.38	140.932	259.326	131.264	75.976	24303	55.882				Q3/1965	#N/A	#N/A	259.326	#N/A	59.1709	#N/A	3.0818	Q3/1965	#N/A	#N/A	#N/A		255.585	3.0818
Q4/1965	1965-12-31	766.286	120.936	145.54	261.514	130.708	78.436	24633	57.886				Q4/1965	#N/A	#N/A	261.514	#N/A	59.6702	#N/A	3.4189	Q4/1965	#N/A	#N/A	#N/A		257.742	3.4189
Q1/1966	1966-03-31	797.254	118.56	147.792	263.931	129.373	80.941	25202	59.944				Q1/1966	#N/A	#N/A	263.931	#N/A	60.2217	#N/A	3.7485	Q1/1966	#N/A	#N/A	#N/A		260.124	3.7485
Q2/1966	1966-06-30	783.514	117.384	150.948	263.941	132.432	83.408	27935	61.632				Q2/1966	#N/A	#N/A	263.941	#N/A	60.224	#N/A	0.0151	Q2/1966	#N/A	#N/A	#N/A		260.134	0.0151
Q3/1966	1966-09-30	792.776	119.176	153.612	261.544	140.887	82.666	28570	62.949				Q3/1966	#N/A	#N/A	261.544	#N/A	59.6771	#N/A	-3.5836	Q3/1966	#N/A	#N/A	#N/A		257.771	-3.5836
Q4/1966	1966-12-31	781.348	119.592	154.952	256.131	140.942	83.693	28424	63.836				Q4/1966	#N/A	#N/A	256.131	#N/A	58.4418	#N/A	-8.0258	Q4/1966	#N/A	#N/A	#N/A		252.436	-8.0258
Q1/1967	1967-03-31	774.308	124.504	159.608	247.701	145.058	83.879	29618	64.293				Q1/1967	#N/A	#N/A	247.701	#N/A	56.5184	#N/A	-12.5292	Q1/1967	#N/A	#N/A	#N/A		244.127	-12.5292
Q2/1967	1967-06-30	780.945	130.296	162.204	242.546	150.454	83.545	31658	65.105				Q2/1967	#N/A	#N/A	242.546	#N/A	55.3421	#N/A	-8.0683	Q2/1967	#N/A	#N/A	#N/A		239.047	-8.0683
Q3/1967	1967-09-30	789.761	130.884	164.344	240.666	154.069	82.377	33210	66.273				Q3/1967	#N/A	#N/A	240.666	#N/A	54.9132	#N/A	-3.0647	Q3/1967	#N/A	#N/A	#N/A		237.194	-3.0647
Q4/1967	1967-12-31	806.53	130.464	167.104	241.331	157.851	81.205	35285	67.702				Q4/1967	#N/A	#N/A	241.331	#N/A	55.065	#N/A	1.1109	Q4/1967	#N/A	#N/A	#N/A		237.85	1.1109
Q1/1968	1968-03-31	817.641	140.488	171.54	249.292	158.463	82.888	37091	69.391				Q1/1968	#N/A	#N/A	249.292	#N/A	56.8814	#N/A	13.8613	Q1/1968	#N/A	#N/A	#N/A		245.695	13.8613
Q2/1968	1968-06-30	816.846	139.076	161.964	243.347	163.802	82.95	38151	71.126				Q2/1968	#N/A	#N/A	243.347	#N/A	55.5249	#N/A	-9.203	Q2/1968	#N/A	#N/A	#N/A		239.836	-9.203
Q3/1968	1968-09-30	824.491	142.968	176.772	249.212	172.146	83	38676	72.907				Q3/1968	#N/A	#N/A	249.212	#N/A	56.8633	#N/A	9.9956	Q3/1968	#N/A	#N/A	#N/A		245.617	9.9956
Q4/1968	1968-12-31	834.206	150.232	179.76	262.445	178.597	85.014	42202	74.862				Q4/1968	#N/A	#N/A	262.445	#N/A	59.8825	#N/A	22.9912	Q4/1968	#N/A	#N/A	#N/A		258.659	22.9912
Q1/1969	1969-03-31	859.277	138.7	178.956	269.136	178.709	85.88	41959	76.989				Q1/1969	#N/A	#N/A	269.136	#N/A	61.4093	#N/A	10.595	Q1/1969	#N/A	#N/A	#N/A		265.253	10.595
Q2/1969	1969-06-30	848.708	139.432	185.532	272.273	185.939	87.3	44680	78.74				Q2/1969	#N/A	#N/A	272.273	#N/A	62.125	#N/A	4.7437	Q2/1969	#N/A	#N/A	#N/A		268.345	4.7437
Q3/1969	1969-09-30	859.031	144.432	188.108	279.844	184.549	88.026	48062	80.112				Q3/1969	#N/A	#N/A	279.844	#N/A	63.8526	#N/A	11.5961	Q3/1969	#N/A	#N/A	#N/A		275.807	11.5961
Q4/1969	1969-12-31	826.046	145.132	191.104	279.119	175.983	88.662	50725	81.26				Q4/1969	#N/A	#N/A	279.119	#N/A	63.687	#N/A	-1.0331	Q4/1969	#N/A	#N/A	#N/A		275.092	-1.0331
Q1/1970	1970-03-31	828.723	140.776	190.936	274.821	186.758	88.802	52411	83.907				Q1/1970	68.35	#N/A	274.821	62.7064	62.7064	-6.39488e-14	-6.018	Q1/1970	#N/A	#N/A	#N/A		270.856	-6.018
Q2/1970	1970-06-30	809.618	146.644	195.416	297.418	185.304	85.674	53244	82.713				Q2/1970	73.97	#N/A	297.418	67.8624	67.8624	0	37.1729	Q2/1970	#N/A	#N/A	#N/A		293.106	37.1327
Q3/1970	1970-09-30	823.604	148.352	198.184	313.38	188.444	87.968	55016	81.365				Q3/1970	77.94	#N/A	313.38	71.5046	71.5046	0	23.2591	Q3/1970	#N/A	#N/A	#N/A		308.827	23.2433
Q4/1970	1970-12-31	823.081	152.844	198.624	313.3	186.701	89.388	55140	79.985				Q4/1970	77.92	#N/A	313.3	71.4862	71.4862	0	-0.102604	Q4/1970	#N/A	#N/A	#N/A		308.738	-0.115
Q1/1971	1971-03-31	821.571	149.972	204.54	308.596	189.421	90.011	55788	78.431				Q1/1971	76.75	#N/A	308.596	70.4128	70.4128	0	-5.87223	Q1/1971	#N/A	#N/A	#N/A		304.13	-5.8375
Q2/1971	1971-06-30	846.078	157.256	208.188	319.452	186.298	93.742	56372	78.624				Q2/1971	79.45	#N/A	319.452	72.8899	72.8899	0	14.8318	Q2/1971	#N/A	#N/A	#N/A		314.833	14.8377
Q3/1971	1971-09-30	859.513	160.904	211.168	319.251	186.54	95.925	56638	79.368				Q3/1971	79.4	#N/A	319.251	72.844	72.844	0	-0.251493	Q3/1971	#N/A	#N/A	#N/A		314.611	-0.2819
Q4/1971	1971-12-31	871.878	163.256	213.14	319.773	187.296	97.699	57174	81.705				Q4/1971	79.53	#N/A	319.773	72.9633	72.9633	0	0.656522	Q4/1971	#N/A	#N/A	#N/A		315.189	0.7362
Q1/1972	1972-03-31	899.025	161.76	216.852	320.256	189.558	97.955	60459	85.378				Q1/1972	79.65	#N/A	320.256	73.0734	73.0734	0	0.604913	Q1/1972	#N/A	#N/A	#N/A		315.655	0.593
Q2/1972	1972-06-30	913.629	167.084	219.764	320.939	188.695	99.189	61335	89.622				Q2/1972	79.82	#N/A	320.939	73.2294	73.2294	0	0.856472	Q2/1972	#N/A	#N/A	#N/A		316.232	0.7337
Q3/1972	1972-09-30	912.827	166.656	223.084	327.855	194.685	98.409	62588	92.697				Q3/1972	81.54	#N/A	327.855	74.8073	74.8073	0	8.90202	Q3/1972	#N/A	#N/A	#N/A		323.116	8.995
Q4/1972	1972-12-31	956.836	166.152	227.46	331.313	197.038	97.402	64374	95.612				Q4/1972	82.4	#N/A	331.313	75.5963	75.5963	0	4.286	Q4/1972	#N/A	#N/A	#N/A		326.535	4.3008
Q1/1973	1973-03-31	999.916	174.768	230.608	335.495	197.059	102.643	68296	99.092				Q1/1973	83.44	#N/A	335.495	76.5505	76.5505	0	5.14493	Q1/1973	#N/A	#N/A	#N/A		330.643	5.1284
Q2/1973	1973-06-30	1000.64	169.02	234.76	330.268	198.572	104.904	69036	101.846				Q2/1973	82.14	#N/A	330.268	75.3578	75.3578	0	-6.08789	Q2/1973	#N/A	#N/A	#N/A		325.492	-6.0882
Q3/1973	1973-09-30	991.333	165.628	240.168	326.247	205.897	106.926	69550	103.573				Q3/1973	81.14	#N/A	326.247	74.4404	74.4404	0	-4.78153	Q3/1973	#N/A	#N/A	#N/A		321.539	-4.7696
Q4/1973	1973-12-31	986.58	164.864	243.156	317.039	210.279	110.723	70642	106.026				Q4/1973	78.85	#N/A	317.039	72.3394	72.3394	0	-10.8201	Q4/1973	#N/A	#N/A	#N/A		312.435	-10.854
Q1/1974	1974-03-31	974.602	163.396	244.208	317.12	209.014	115.027	64942	108.549				Q1/1974	78.87	#N/A	317.12	72.3578	72.3578	0	0.101497	Q1/1974	#N/A	#N/A	#N/A		312.513	0.0999
Q2/1974	1974-06-30	971.41	154.472	246.184	299.267	206.446	111.152	62880	109.692				Q2/1974	74.43	#N/A	299.267	68.2844	68.2844	0	-20.6869	Q2/1974	#N/A	#N/A	#N/A		294.926	-20.6798
Q3/1974	1974-09-30	952.849	152.744	243.92	294.362	214.172	111.23	62919	109.55				Q3/1974	73.21	#N/A	294.362	67.1651	67.1651	0	-6.39705	Q3/1974	#N/A	#N/A	#N/A		290.13	-6.3481
Q4/1974	1974-12-31	906.215	153.396	237.444	290.18	204.175	110.665	63173	108.208				Q4/1974	72.17	#N/A	290.18	66.211	66.211	0	-5.56235	Q4/1974	#N/A	#N/A	#N/A		286	-5.5737
Q1/1975	1975-03-31	868.946	149.32	232.536	299.066	198.948	111.697	60694	105.955				Q1/1975	74.38	#N/A	299.066	68.2385	68.2385	0	12.8231	Q1/1975	#N/A	#N/A	#N/A		294.749	12.809
Q2/1975	1975-06-30	843.978	148.716	231.208	273.655	197.116	114.779	63393	104.029				Q2/1975	68.06	#N/A	273.655	62.4404	62.4404	-7.10543e-14	-29.896	Q2/1975	#N/A	#N/A	#N/A		269.702	-29.8987
Q3/1975	1975-09-30	876.966	146.476	227.82	282.46	198.029	119.327	63908	103.592				Q3/1975	70.25	#N/A	282.46	64.4495	64.4495	0	13.5057	Q3/1975	#N/A	#N/A	#N/A		278.406	13.5481
Q4/1975	1975-12-31	899.234	142.252	232.452	292.11	196.29	121.304	64193	102.803				Q4/1975	72.65	#N/A	292.11	66.6514	66.6514	0	14.3819	Q4/1975	#N/A	#N/A	#N/A		287.821	14.2286
Q1/1976	1976-03-31	933.884	149.344	237.9	289.256	195.79	122.562	65841	102.931				Q1/1976	71.94	#N/A	289.256	66	66	0	-3.85222	Q1/1976	#N/A	#N/A	#N/A		285.056	-3.7867
Q2/1976	1976-06-30	931.416	148.008	238.784	293.799	192.468	126.697	64885	103.284				Q2/1976	73.07	#N/A	293.799	67.0367	67.0367	0	6.43261	Q2/1976	#N/A	#N/A	#N/A		289.542	6.4439
Q3/1976	1976-09-30	936.374	146.224	234.616	289.698	196.349	123.52	65539	103.406				Q3/1976	72.05	#N/A	289.698	66.1009	66.1009	0	-5.46786	Q3/1976	#N/A	#N/A	#N/A		285.501	-5.467
Q4/1976	1976-12-31	969.774	147.24	233.256	300.835	201.577	124.254	63238	103.419				Q4/1976	74.82	#N/A	300.835	68.6422	68.6422	0	16.288	Q4/1976	#N/A	#N/A	#N/A		296.469	16.2764
Q1/1977	1977-03-31	1003.58	143.504	235.3	312.415	203.401	126.099	66110	103.355				Q1/1977	77.7	#N/A	312.415	71.2844	71.2844	0	16.309	Q1/1977	#N/A	#N/A	#N/A		307.85	16.2614
Q2/1977	1977-06-30	1053.22	151.412	234.184	303.328	203.651	127.048	65946	102.353				Q2/1977	75.44	#N/A	303.328	69.211	69.211	0	-11.1367	Q2/1977	#N/A	#N/A	#N/A		298.923	-11.1036
Q3/1977	1977-09-30	1059.32	149.788	234.88	305.258	200.095	128.463	66692	101.782				Q3/1977	75.92	#N/A	305.258	69.6514	69.6514	0	2.56946	Q3/1977	#N/A	#N/A	#N/A		300.833	2.58
Q4/1977	1977-12-31	1070.42	155.332	233.896	309.922	200.135	127.518	68150	101.839				Q4/1977	77.08	#N/A	309.922	70.7156	70.7156	0	6.2532	Q4/1977	#N/A	#N/A	#N/A		305.407	6.2221
Q1/1978	1978-03-31	1075.32	160.824	237.512	318.648	198.456	127.04	69737	101.544				Q1/1978	79.25	#N/A	318.648	72.7064	72.7064	0	11.7456	Q1/1978	#N/A	#N/A	#N/A		314.034	11.7861
Q2/1978	1978-06-30	1164.68	161.06	240.748	315.511	200.876	130.061	71870	100.337				Q2/1978	78.47	#N/A	315.511	71.9908	71.9908	0	-3.87917	Q2/1978	#N/A	#N/A	#N/A		310.969	-3.8465
Q3/1978	1978-09-30	1198.14	160.932	241.544	328.378	204.871	129.949	72224	98.95				Q3/1978	81.67	#N/A	328.378	74.9266	74.9266	0	17.3372	Q3/1978	#N/A	#N/A	#N/A		323.626	17.3023
Q4/1978	1978-12-31	1224.97	161.468	244.724	330.067	210.04	131.62	74219	97.442				Q4/1978	82.09	#N/A	330.067	75.3119	75.3119	0	2.07298	Q4/1978	#N/A	#N/A	#N/A		325.27	2.0466
Q1/1979	1979-03-31	1217.96	169.744	242.904	322.105	209.236	133.164	75127	95.772				Q1/1979	80.11	#N/A	322.105	73.4954	73.4954	0	-9.30447	Q1/1979	#N/A	#N/A	#N/A		317.463	-9.2602
Q2/1979	1979-06-30	1219.6	173.644	244.892	348.401	212.098	134.451	76292	94.835				Q2/1979	86.65	#N/A	348.401	79.4954	79.4954	0	36.876	Q2/1979	#N/A	#N/A	#N/A		343.4	36.9081
Q3/1979	1979-09-30	1251.52	176.88	250.672	350.532	217.693	141.496	76967	94.79				Q3/1979	87.18	#N/A	350.532	79.9817	79.9817	0	2.46916	Q3/1979	#N/A	#N/A	#N/A		345.443	2.4011
Q4/1979	1979-12-31	1241.06	179.372	254.836	354.835	226.24	142.222	76647	95.355				Q4/1979	88.25	#N/A	354.835	80.9633	80.9633	0	5.00051	Q4/1979	#N/A	#N/A	#N/A		349.707	5.0291
Q1/1980	1980-03-31	1234.48	170.68	256.96	360.906	222.796	144	76223	97.526				Q1/1980	89.76	#N/A	360.906	82.3486	82.3486	0	7.02187	Q1/1980	#N/A	#N/A	#N/A		355.691	7.0222
Q2/1980	1980-06-30	1135.83	164.004	256.392	354.674	222.711	140.435	75619	96.234				Q2/1980	88.21	#N/A	354.674	80.9266	80.9266	0	-6.73044	Q2/1980	#N/A	#N/A	#N/A		349.562	-6.7161
Q3/1980	1980-09-30	1136.07	161.052	255.76	349.004	221.775	146.32	75060	93.799				Q3/1980	86.8	#N/A	349.004	79.633	79.633	0	-6.24216	Q3/1980	#N/A	#N/A	#N/A		343.966	-6.2512
Q4/1980	1980-12-31	1175.48	158.72	254.256	342.169	223.791	150.442	76957	95.864				Q4/1980	85.1	#N/A	342.169	78.0734	78.0734	0	-7.60694	Q4/1980	#N/A	#N/A	#N/A		337.171	-7.6708
Q1/1981	1981-03-31	1189.16	149.972	252.876	342.008	221.009	157.668	78253	93.871				Q1/1981	85.06	#N/A	342.008	78.0367	78.0367	0	-0.187882	Q1/1981	#N/A	#N/A	#N/A		337.038	-0.1574
Q2/1981	1981-06-30	1187.45	153.448	253.308	347.999	221.747	161.89	77660	94.676				Q2/1981	86.55	#N/A	347.999	79.4037	79.4037	0	7.19309	Q2/1981	#N/A	#N/A	#N/A		342.945	7.1967
Q3/1981	1981-09-30	1183.38	154.732	252.88	335.937	221.48	158.142	78642	95.065				Q3/1981	83.55	#N/A	335.937	76.6514	76.6514	0	-13.1605	Q3/1981	#N/A	#N/A	#N/A		331.087	-13.1298
Q4/1981	1981-12-31	1183.85	152.852	254.536	317.321	215.992	156.496	78270	93.468				Q4/1981	78.92	#N/A	317.321	72.4037	72.4037	0	-20.3909	Q4/1981	#N/A	#N/A	#N/A		312.79	-20.34
Q1/1982	1982-03-31	1146.33	152.616	252.74	321.744	217.361	151.44	77376	95.039				Q1/1982	80.02	#N/A	321.744	73.4128	73.4128	0	5.69292	Q1/1982	#N/A	#N/A	#N/A		317.12	5.654
Q2/1982	1982-06-30	1120.15	159.52	253.684	321.904	211.373	141.206	78611	94.793				Q2/1982	80.06	#N/A	321.904	73.4495	73.4495	0	0.2001	Q2/1982	#N/A	#N/A	#N/A		317.209	0.1121
Q3/1982	1982-09-30	1091.44	164.22	249.976	316.275	209.723	134.93	78734	95.208				Q3/1982	78.66	#N/A	316.275	72.1651	72.1651	0	-6.81341	Q3/1982	#N/A	#N/A	#N/A		311.614	-6.8714
Q4/1982	1982-12-31	1098.18	166.076	247.372	318.125	211.015	138.086	78234	95.844				Q4/1982	79.12	#N/A	318.125	72.5872	72.5872	0	2.35978	Q4/1982	#N/A	#N/A	#N/A		313.567	2.5319
Q1/1983	1983-03-31	1118.31	170.968	246.236	318.326	209.222	137.314	77496	96.078				Q1/1983	79.17	#N/A	318.326	72.633	72.633	0	0.25302	Q1/1983	#N/A	#N/A	#N/A		313.701	0.1704
Q2/1983	1983-06-30	1156.92	168.888	243.572	329.222	209.389	140.209	76855	94.793				Q2/1983	81.88	#N/A	329.222	75.1193	75.1193	0	14.4113	Q2/1983	#N/A	#N/A	#N/A		324.448	14.4237
Q3/1983	1983-09-30	1223.12	170.52	242.564	329.624	210.389	141.662	77183	94.111				Q3/1983	81.98	#N/A	329.624	75.211	75.211	0	0.489415	Q3/1983	#N/A	#N/A	#N/A		324.848	0.4937
Q4/1983	1983-12-31	1285.87	178.512	241.456	336.54	211.469	142.711	77185	91.196				Q4/1983	83.7	#N/A	336.54	76.789	76.789	0	8.66012	Q4/1983	#N/A	#N/A	#N/A		331.598	8.5744
Q1/1984	1984-03-31	1327.26	182.328	242.56	324.759	213.612	143.035	78571	91.131				Q1/1984	80.77	#N/A	324.759	74.1009	74.1009	0	-13.2841	Q1/1984	#N/A	#N/A	#N/A		320.018	-13.2535
Q2/1984	1984-06-30	1378.68	182.984	240.948	317.321	217.206	142.854	81639	88.372				Q2/1984	78.92	#N/A	317.321	72.4037	72.4037	0	-8.85183	Q2/1984	#N/A	#N/A	#N/A		312.735	-8.7974
Q3/1984	1984-09-30	1406.15	183.272	240.776	335.374	222.103	144.099	80715	88.97				Q3/1984	83.41	#N/A	335.374	76.5229	76.5229	0	24.774	Q3/1984	#N/A	#N/A	#N/A		330.588	24.8651
Q4/1984	1984-12-31	1441.81	184.66	242.476	340.802	220.871	144.244	82102	89.716				Q4/1984	84.76	#N/A	340.802	77.7615	77.7615	0	6.63292	Q4/1984	#N/A	#N/A	#N/A		335.872	6.5494
Q1/1985	1985-03-31	1452.42	198.548	242.016	319.452	218.782	147.686	84461	92.443				Q1/1985	79.45	#N/A	319.452	72.8899	72.8899	0	-22.801	Q1/1985	#N/A	#N/A	#N/A		314.833	-22.7992
Q2/1985	1985-06-30	1483.79	182.32	246.14	333.886	221.561	154.704	86224	92.547				Q2/1985	83.04	#N/A	333.886	76.1835	76.1835	0	19.3366	Q2/1985	#N/A	#N/A	#N/A		329	19.2516
Q3/1985	1985-09-30	1485.28	183.888	250.104	336.58	221.345	159.526	88819	96.494				Q3/1985	83.71	#N/A	336.58	76.7982	76.7982	0	3.26663	Q3/1985	#N/A	#N/A	#N/A		331.709	3.3346
Q4/1985	1985-12-31	1505.44	183.156	251.312	346.27	222.294	160.97	89058	100.726				Q4/1985	86.12	#N/A	346.27	79.0092	79.0092	0	12.0229	Q4/1985	#N/A	#N/A	#N/A		341.257	12.0211
Q1/1986	1986-03-31	1511.56	181.132	252.54	337.585	227.507	162.665	89054	102.927				Q1/1986	83.96	#N/A	337.585	77.0275	77.0275	0	-9.66134	Q1/1986	#N/A	#N/A	#N/A		332.675	-9.6869
Q2/1986	1986-06-30	1516.6	176.088	256.688	341.285	226.186	162.216	91593	105.011				Q2/1986	84.88	#N/A	341.285	77.8716	77.8716	0	4.45561	Q2/1986	#N/A	#N/A	#N/A		336.361	4.5062
Q3/1986	1986-09-30	1527.07	186.032	259.284	344.3	227.692	161.099	92910	105.673				Q3/1986	85.63	#N/A	344.3	78.5596	78.5596	0	3.58152	Q3/1986	#N/A	#N/A	#N/A		339.336	3.5857
Q4/1986	1986-12-31	1526.74	195.108	261.36	356.242	229.321	161.636	94512	108.568				Q4/1986	88.6	#N/A	356.242	81.2844	81.2844	0	14.6123	Q4/1986	#N/A	#N/A	#N/A		351.105	14.611
Q1/1987	1987-03-31	1505.73	190.08	261.82	329.021	232.41	165.772	93835	112.217				Q1/1987	81.83	#N/A	329.021	75.0734	75.0734	0	-27.2362	Q1/1987	#N/A	#N/A	#N/A		324.237	-27.2719
Q2/1987	1987-06-30	1535.48	199.156	267.856	354.835	239.872	173.268	96545	116.806				Q2/1987	88.25	#N/A	354.835	80.9633	80.9633	0	35.2722	Q2/1987	#N/A	#N/A	#N/A		349.684	35.2858
Q3/1987	1987-09-30	1568.09	217.692	274.124	356.885	237.444	182.246	100900	119.818				Q3/1987	88.76	#N/A	356.885	81.4312	81.4312	0	2.33173	Q3/1987	#N/A	#N/A	#N/A		351.727	2.3574
Q4/1987	1987-12-31	1565.44	222.968	279.344	361.75	240.317	185.125	105352	124.837				Q4/1987	89.97	#N/A	361.75	82.5413	82.5413	0	5.56543	Q4/1987	#N/A	#N/A	#N/A		356.523	5.5671
Q1/1988	1988-03-31	1553.16	233.948	285.788	356.564	251.149	188.748	109243	127.888				Q1/1988	88.68	#N/A	356.564	81.3578	81.3578	0	-5.61307	Q1/1988	#N/A	#N/A	#N/A		351.35	-5.6789
Q2/1988	1988-06-30	1584.52	240.124	292.124	364.404	255.043	190.704	110758	132.666				Q2/1988	90.63	#N/A	364.404	83.1468	83.1468	0	9.09006	Q2/1988	#N/A	#N/A	#N/A		359.077	9.0912
Q3/1988	1988-09-30	1588.19	242.256	295.956	370.717	257.479	197.073	114353	136.372				Q3/1988	92.2	#N/A	370.717	84.5872	84.5872	0	7.11142	Q3/1988	#N/A	#N/A	#N/A		365.294	7.1075
Q4/1988	1988-12-31	1605.67	242	302.936	374.416	257.053	194.428	116455	140.962				Q4/1988	93.12	#N/A	374.416	85.4312	85.4312	0	4.05146	Q4/1988	#N/A	#N/A	#N/A		368.979	4.0975
Q1/1989	1989-03-31	1618.37	254.86	309.172	392.63	263.043	202.646	123539	146.071				Q1/1989	97.65	#N/A	392.63	89.5872	89.5872	0	20.9253	Q1/1989	#N/A	#N/A	#N/A		386.988	20.999
Q2/1989	1989-06-30	1624.38	249.796	313.82	383.061	263.046	201.021	118949	149.96				Q2/1989	95.27	#N/A	383.061	87.4037	87.4037	0	-9.39844	Q2/1989	#N/A	#N/A	#N/A		377.484	-9.4672
Q3/1989	1989-09-30	1656.38	252.592	317.812	395.726	266.56	200.132	122227	152.745				Q3/1989	98.42	#N/A	395.726	90.2936	90.2936	0	13.8961	Q3/1989	#N/A	#N/A	#N/A		389.919	13.842
Q4/1989	1989-12-31	1634.46	247.572	323.668	403.446	275.16	206.86	126554	153.705				Q4/1989	100.34	#N/A	403.446	92.055	92.055	0	8.03462	Q4/1989	#N/A	#N/A	#N/A		397.558	8.0693
Q1/1990	1990-03-31	1664.55	249.252	328.944	423.63	278.393	203.762	128029	154.238				Q1/1990	105.36	#N/A	423.63	96.6606	96.6606	0	21.5645	Q1/1990	#N/A	#N/A	#N/A		417.487	21.6102
Q2/1990	1990-06-30	1633.29	245.708	330.432	421.7	280.321	198.829	130937	158.918				Q2/1990	104.88	#N/A	421.7	96.2202	96.2202	0	-1.80991	Q2/1990	#N/A	#N/A	#N/A		415.533	-1.8591
Q3/1990	1990-09-30	1619.23	243.444	331.74	428.174	276.825	193.387	134532	163.131				Q3/1990	106.49	#N/A	428.174	97.6972	97.6972	0	6.28319	Q3/1990	#N/A	#N/A	#N/A		421.928	6.2995
Q4/1990	1990-12-31	1588.97	240.696	331.672	437.1	275.488	186.466	136835	165.079				Q4/1990	108.71	#N/A	437.1	99.7339	99.7339	0	8.60321	Q4/1990	#N/A	#N/A	#N/A		430.721	8.6001
Q1/1991	1991-03-31	1538.06	229.78	328.344	438.266	279.077	188.013	138336	161.93				Q1/1991	109	438.266	438.266	100	100	0	1.07134	Q1/1991	#N/A	#N/A	#N/A		438.266	7.1935
Q2/1991	1991-06-30	1542.37	226.348	330.144	440.272	280.762	185.867	134876	164.144				Q2/1991	109.5	440.272	440.272	100.459	100.458	0.0010027	1.84346	Q2/1991	1.8433	1.84346	-0.000160049		440.272	1.4902
Q3/1991	1991-09-30	1546.67	222.168	329.484	445.237	283.413	186.461	134776	162.151				Q3/1991	110.74	445.237	445.237	101.596	101.591	0.00574374	4.58773	Q3/1991	4.5871	4.58773	-0.000627173		445.237	2.8996
Q4/1991	1991-12-31	1548.68	222.988	327.364	457.522	282.14	189.054	135391	163.781				Q4/1991	113.79	457.522	457.522	104.394	104.394	0.000816688	11.5021	Q4/1991	11.5026	11.5021	0.000528266		457.522	11.3883
Q1/1992	1992-03-31	1570.76	223.604	329.516	467.3	281.403	187.726	132282	167.137				Q1/1992	116.23	467.3	467.3	106.633	106.625	0.00828365	8.82663	Q1/1992	8.8268	8.82663	0.000166153		467.3	12.4916
Q2/1992	1992-06-30	1613.78	222.268	325.84	463.69	281.375	179.996	135752	158.315				Q2/1992	115.33	463.69	463.69	105.807	105.801	0.00629625	-3.05447	Q2/1992	-3.0548	-3.05447	-0.000331432		463.69	-3.3614
Q3/1992	1992-09-30	1627.69	223.12	321.96	454.062	272.174	183.617	134009	154.329				Q3/1992	112.93	454.062	454.062	103.606	103.604	0.00130075	-8.05043	Q3/1992	-8.0503	-8.05043	0.00012818		454.062	-9.3181
Q4/1992	1992-12-31	1663.26	217.704	317.476	453.51	267.85	176.01	130348	145.279				Q4/1992	112.8	453.51	453.51	103.486	103.478	0.0079856	-0.485391	Q4/1992	-0.485	-0.485391	0.000391177		453.51	0.3688
Q1/1993	1993-03-31	1664.12	223.008	312.072	444.296	254.446	174.054	134252	142.053				Q1/1993	110.5	444.296	444.296	101.376	101.376	0.000270038	-7.8825	Q1/1993	-7.8825	-7.8825	2.11365e-07		444.296	-8.0534
Q2/1993	1993-06-30	1698.83	221.752	306.572	438.53	245.24	178.201	130150	142.981				Q2/1993	109.07	438.53	438.53	100.064	100.06	0.00398279	-5.09095	Q2/1993	-5.0916	-5.09095	-0.0006492		438.53	-4.8357
Q3/1993	1993-09-30	1717.04	222	303.036	441.689	240.3	182.054	127344	143.637				Q3/1993	109.85	441.689	441.689	100.78	100.781	-0.00121601	2.91273	Q3/1993	2.9129	2.91273	0.000170164		441.689	2.3449
Q4/1993	1993-12-31	1781.72	226.684	302.176	435.07	239.144	184.582	125374	140.715				Q4/1993	108.21	435.07	435.07	99.2752	99.2708	0.00446685	-5.86086	Q4/1993	-5.8611	-5.86086	-0.000237936		435.07	-5.3519
Q1/1994	1994-03-31	1785.59	229.332	306.628	448.834	241.201	186.96	126292	138.956				Q1/1994	111.62	448.834	448.834	102.404	102.411	-0.00765125	13.2678	Q1/1994	13.2681	13.2678	0.000306285		448.834	14.7941
Q2/1994	1994-06-30	1827.61	224.7	310.156	454.4	247.644	192.836	127914	143.104				Q2/1994	113.01	454.4	454.4	103.679	103.681	-0.00242687	5.05344	Q2/1994	5.054	5.05344	0.000555074		454.4	6.1032
Q3/1994	1994-09-30	1856.29	226.216	312.876	456.406	248.766	192.967	128374	147.318				Q3/1994	113.51	456.406	456.406	104.138	104.139	-0.00142417	1.77757	Q3/1994	1.7775	1.77757	-7.28057e-05		456.406	2.2081
Q4/1994	1994-12-31	1892.28	227.452	314.008	466.236	253.91	194.316	127931	150.544				Q4/1994	115.95	466.236	466.236	106.376	106.382	-0.00582215	8.89748	Q4/1994	8.8967	8.89748	-0.000781584		466.236	8.8721
Q1/1995	1995-03-31	1928.5	224.468	316.164	454.764	256.549	189.491	127238	155.28				Q1/1995	113.11	454.764	454.764	103.771	103.764	0.00626167	-9.48489	Q1/1995	-9.4845	-9.48489	0.000387702		454.764	-10.2882
Q2/1995	1995-06-30	1930.4	224.836	314.776	462.787	261.311	189.039	130724	156.336				Q2/1995	115.1	462.787	462.787	105.596	105.595	0.00132633	7.2458	Q2/1995	7.246	7.2458	0.000200252		462.787	8.0634
Q3/1995	1995-09-30	1946	226.476	314.9	457.923	267.846	188.585	134306	156.672				Q3/1995	113.89	457.923	457.923	104.486	104.485	0.00106286	-4.13828	Q3/1995	-4.1383	-4.13828	-2.19433e-05		457.923	-4.8821
Q4/1995	1995-12-31	1977.2	227.632	315.408	454.714	279.038	189.492	136069	156.544				Q4/1995	113.1	454.714	454.714	103.761	103.753	0.00849595	-2.77376	Q4/1995	-2.774	-2.77376	-0.000236191		454.714	-3.8125
Q1/1996	1996-03-31	2022.1	233.552	317.584	430.093	270.104	193.664	138523	160.136				Q1/1996	106.97	430.093	430.093	98.1376	98.1352	0.00246388	-19.962	Q1/1996	-19.9621	-19.962	-9.37592e-05		430.093	-19.779
Q2/1996	1996-06-30	2080.2	241.164	316.884	464.693	271.242	193.723	141395	159.812				Q2/1996	115.58	464.693	464.693	106.037	106.03	0.0067976	36.2746	Q2/1996	36.2746	36.2746	-3.41744e-05		464.693	37.9915
Q3/1996	1996-09-30	2122.8	239.184	318.284	464.091	270.679	201.641	141622	160.316				Q3/1996	115.43	464.091	464.091	105.899	105.893	0.00654242	-0.517185	Q3/1996	-0.517	-0.517185	0.00018549		464.091	-1.6164
Q4/1996	1996-12-31	2155	231.68	317.456	465.244	266.117	211.253	141111	159.976				Q4/1996	115.71	465.244	465.244	106.156	106.156	0.000340918	0.99748	Q4/1996	0.9978	0.99748	0.000319819		465.244	1.2405
Q1/1997	1997-03-31	2190.6	221.452	314.372	450.777	268.345	215.174	140223	165.06				Q1/1997	112.11	450.777	450.777	102.853	102.855	-0.00144803	-11.87	Q1/1997	-11.8702	-11.87	-0.000220632		450.777	-12.4819
Q2/1997	1997-06-30	2223	230.66	319.224	460.506	271.192	220.995	137873	167.68				Q2/1997	114.53	460.506	460.506	105.073	105.075	-0.00114927	8.91663	Q2/1997	8.9163	8.91663	-0.000325282		460.506	10.3105
Q3/1997	1997-09-30	2289.4	236.268	320.664	461.158	273.542	227.679	137160	168.576				Q3/1997	114.69	461.158	461.158	105.22	105.223	-0.00312838	0.567537	Q3/1997	0.5675	0.567537	-3.74419e-05		461.158	1.0455
Q4/1997	1997-12-31	2296.9	242.076	325.812	465.119	285.101	229.885	136164	172.808				Q4/1997	115.68	465.119	465.119	106.128	106.127	0.00133947	3.48022	Q4/1997	3.4808	3.48022	0.00058206		465.119	3.9321
Q1/1998	1998-03-31	2349.9	242.712	331.304	477.392	280.891	229.41	132910	179.864				Q1/1998	118.73	477.392	477.392	108.927	108.927	-0.000849511	10.9799	Q1/1998	10.9796	10.9799	-0.000273383		477.392	9.7768
Q2/1998	1998-06-30	2429.4	246.948	337.984	471.374	283.067	229.92	131488	181.816				Q2/1998	117.24	471.374	471.374	107.56	107.554	0.0053167	-4.94785	Q2/1998	-4.9475	-4.94785	0.000349162		471.374	-4.2599
Q3/1998	1998-09-30	2483.3	246.932	343.976	477.292	285.597	230.374	132020	189.632				Q3/1998	118.71	477.292	477.292	108.908	108.905	0.00361906	5.11728	Q3/1998	5.1166	5.11728	-0.000682311		477.292	5.544
Q4/1998	1998-12-31	2538	254.888	348.876	474.584	289.183	232.945	133023	195.216				Q4/1998	118.03	474.584	474.584	108.284	108.287	-0.00234456	-2.25023	Q4/1998	-2.2501	-2.25023	0.000128856		474.584	-3.1997
Q1/1999	1999-03-31	2577.71	253.136	357.44	488.311	290.577	235.528	131076	197.616				Q1/1999	121.45	488.311	488.311	111.422	111.419	0.00315401	12.0814	Q1/1999	12.0816	12.0814	0.000170699		488.311	10.6533
Q2/1999	1999-06-30	2635.44	252.504	363.504	492.523	293.259	241.545	132101	204.64				Q2/1999	122.5	492.523	492.523	112.385	112.38	0.00539658	3.49516	Q2/1999	3.4953	3.49516	0.000141451		492.523	4.587
Q3/1999	1999-09-30	2692.08	258.76	369.892	502.001	297.903	243.492	130619	207.004				Q3/1999	124.86	502.001	502.001	114.55	114.543	0.00792062	7.92257	Q3/1999	7.922	7.92257	-0.000566461		502.001	9.3026
Q4/1999	1999-12-31	2713.43	251.592	376.324	500.145	303.019	249.441	130521	211.876				Q4/1999	124.39	500.145	500.145	114.119	114.119	0.000215068	-1.4707	Q4/1999	-1.4702	-1.4707	0.000500123		500.145	-2.6131
Q1/2000	2000-03-31	2778.93	261.484	384.044	509.485	312.829	251.683	131244	216.1				Q1/2000	126.71	509.485	509.485	116.248	116.25	-0.00247041	7.6817	Q1/2000	7.6813	7.6817	-0.000395002		509.485	9.6273
Q2/2000	2000-06-30	2824.97	276.596	388.504	508.933	315.911	253.401	130277	218.576				Q2/2000	126.58	508.933	508.933	116.128	116.124	0.00421444	-0.432675	Q2/2000	-0.4324	-0.432675	0.000274998		508.933	-0.6474
Q3/2000	2000-09-30	2838.66	251.86	396.22	513.496	320.46	256.447	131847	222.264				Q3/2000	127.71	513.496	513.496	117.165	117.165	-0.000236838	3.63485	Q3/2000	3.6351	3.63485	0.000252855		513.496	3.5126
Q4/2000	2000-12-31	2846.56	258.704	399.304	509.735	318.854	257.6	133616	225.12				Q4/2000	126.78	509.735	509.735	116.312	116.307	0.00470679	-2.89769	Q4/2000	-2.8977	-2.89769	-9.39382e-06		509.735	-3.8462
Q1/2001	2001-03-31	2840.17	254.796	401.452	511.391	323.658	264.619	135343	227.448				Q1/2001	127.19	511.391	511.391	116.688	116.685	0.00300086	1.30585	Q1/2001	1.3051	1.30585	-0.0007451		511.391	0.1261
Q2/2001	2001-06-30	2831.73	263.188	400.56	502.113	327.686	268.123	129838	230.704				Q2/2001	124.88	502.113	502.113	114.569	114.568	0.00071399	-7.06195	Q2/2001	-7.0613	-7.06195	0.000653358		502.113	-7.8203
Q3/2001	2001-09-30	2794.69	257.312	401.172	493.94	325.942	271.42	128380	232.932				Q3/2001	122.85	493.94	493.94	112.706	112.703	0.00317787	-6.35363	Q3/2001	-6.3542	-6.35363	-0.000565564		493.94	-7.1415
Q4/2001	2001-12-31	2761.6	246.432	400.488	488.674	326.7	264.088	124429	234.04				Q4/2001	121.54	488.674	488.674	111.505	111.502	0.0028964	-4.19677	Q4/2001	-4.1963	-4.19677	0.000472092		488.674	-4.5428
Q1/2002	2002-03-31	2758.57	250.604	397.148	479.335	335.913	264.761	124077	237.448				Q1/2002	119.22	479.335	479.335	109.376	109.371	0.00535371	-7.428	Q1/2002	-7.4282	-7.428	-0.000197274		479.335	-8.115
Q2/2002	2002-06-30	2757.24	262.596	394.44	469.055	331.744	268.326	122181	240.768				Q2/2002	116.66	469.055	469.055	107.028	107.025	0.00233732	-8.30651	Q2/2002	-8.3063	-8.30651	0.000207761		469.055	-8.601
Q3/2002	2002-09-30	2758.43	261.156	397.4	467.3	341.139	272.535	122955	243.404				Q3/2002	116.23	467.3	467.3	106.633	106.625	0.00828365	-1.48825	Q3/2002	-1.4883	-1.48825	-5.246e-05		467.3	-0.8709
Q4/2002	2002-12-31	2755.91	276.264	400.24	464.743	350.255	273.271	122304	246.236				Q4/2002	115.59	464.743	464.743	106.046	106.041	0.00456331	-2.17084	Q4/2002	-2.1712	-2.17084	-0.000355457		464.743	-1.7006
Q1/2003	2003-03-31	2772.33	275.336	401.28	465.044	339.628	275.732	121139	253.812				Q1/2003	115.66	465.044	465.044	106.11	106.11	0.000103745	0.25932	Q1/2003	0.2592	0.25932	-0.000119709		465.044	-0.8566
Q2/2003	2003-06-30	2826.06	262.692	401.108	463.289	338.409	278.478	122603	257				Q2/2003	115.23	463.289	463.289	105.716	105.71	0.00605007	-1.50101	Q2/2003	-1.5011	-1.50101	-8.9045e-05		463.289	-0.5596
Q3/2003	2003-09-30	2910.12	262.116	408.084	463.64	337.87	287.231	120916	260.388				Q3/2003	115.32	463.64	463.64	105.798	105.79	0.00853053	0.303395	Q3/2003	0.3034	0.303395	4.84766e-06		463.64	0.7644
Q4/2003	2003-12-31	2954.34	263.196	409.324	462.787	340.689	293.762	123065	264.14				Q4/2003	115.1	462.787	462.787	105.596	105.595	0.00132633	-0.733887	Q4/2003	-0.7334	-0.733887	0.000487391		462.787	-0.3998
Q1/2004	2004-03-31	2946.21	273.484	414.144	462.399	345.158	300.631	121604	266.128				Q1/2004	115	462.399	462.399	105.505	105.506	-0.00188608	-0.334938	Q1/2004	-0.3354	-0.334938	-0.000462048		462.399	-2.9527
Q2/2004	2004-06-30	3014.74	274.732	416.12	457.835	345.444	305.377	121740	269.872				Q2/2004	113.87	457.835	457.835	104.468	104.465	0.00279337	-3.89004	Q2/2004	-3.8895	-3.89004	0.000535846		457.835	-2.7971
Q3/2004	2004-09-30	3063.42	269.732	417.636	460.293	343.208	309.818	121941	274.492				Q3/2004	114.48	460.293	460.293	105.028	105.026	0.00157979	2.16485	Q3/2004	2.1641	2.16485	-0.000754597		460.293	1.5956
Q4/2004	2004-12-31	3103.64	270.268	422.66	456.833	346.14	315.116	122974	277.964				Q4/2004	113.62	456.833	456.833	104.239	104.236	0.00206385	-2.97305	Q4/2004	-2.9731	-2.97305	-5.26916e-05		456.833	-3.2412
Q1/2005	2005-03-31	3142.56	274.364	425.156	452.068	347.69	323.672	124601	283.956				Q1/2005	112.43	452.068	452.068	103.147	103.149	-0.00244002	-4.10738	Q1/2005	-4.1066	-4.10738	0.000778413		452.068	-2.8785
Q2/2005	2005-06-30	3189.19	295.48	428.324	459.691	350.528	331.471	125257	291.572				Q2/2005	114.33	459.691	459.691	104.89	104.889	0.00132461	6.91754	Q2/2005	6.9168	6.91754	-0.000735445		459.691	6.359
Q3/2005	2005-09-30	3233.88	287.144	432.42	466.31	354.091	340.435	127546	295.632				Q3/2005	115.98	466.31	466.31	106.404	106.399	0.00481606	5.88511	Q3/2005	5.8854	5.88511	0.000285225		466.31	4.1134
Q4/2005	2005-12-31	3241.84	285.764	434.672	477.342	355.432	347.689	125955	298.748				Q4/2005	118.72	477.342	477.342	108.917	108.916	0.00138477	9.80438	Q4/2005	9.8046	9.80438	0.00021655		477.342	11.5815
Q1/2006	2006-03-31	3302.1	289.964	437.088	474.81	359.696	354.09	126059	305.636				Q1/2006	118.1	474.81	474.81	108.349	108.338	0.0103088	-2.10493	Q1/2006	-2.105	-2.10493	-7.30183e-05		474.81	-0.5932
Q2/2006	2006-06-30	3290.56	287.172	445.78	502.891	360.128	357.233	126498	312.772				Q2/2006	125.08	502.891	502.891	114.752	114.746	0.00668247	25.8392	Q2/2006	25.8387	25.8392	-0.000522116		502.891	28.6336
Q3/2006	2006-09-30	3259.63	295.24	448.556	506.401	361.016	357.16	125298	316.132				Q3/2006	125.95	506.401	506.401	115.55	115.546	0.00396412	2.82122	Q3/2006	2.8213	2.82122	7.70204e-05		506.401	1.6245
Q4/2006	2006-12-31	3234.17	300.82	456.48	522.296	374.164	359.138	127419	321.42				Q4/2006	129.91	522.296	522.296	119.183	119.173	0.0101988	13.1589	Q4/2006	13.1593	13.1589	0.000435525		522.296	13.2587
Q1/2007	2007-03-31	3229.97	304.384	464.172	521.018	372.85	364.325	127210	323.392				Q1/2007	129.58	521.018	521.018	118.881	118.882	-0.000949781	-0.975169	Q1/2007	-0.9753	-0.975169	-0.000131159		521.018	2.8651
Q2/2007	2007-06-30	3247.54	311.172	469.232	517.658	367.75	367.022	125403	329.16				Q2/2007	128.75	517.658	517.658	118.119	118.115	0.00424002	-2.55472	Q2/2007	-2.5546	-2.55472	0.000119406		517.658	-4.1893
Q3/2007	2007-09-30	3233.31	300.9	474.636	520.466	368.194	368.542	122305	327.692				Q3/2007	129.45	520.466	520.466	118.761	118.756	0.00573507	2.18749	Q3/2007	2.1876	2.18749	0.000109079		520.466	1.2862
Q4/2007	2007-12-31	3213.37	317.988	477.98	533.855	365.742	372.952	120703	330.608				Q4/2007	132.78	533.855	533.855	121.817	121.811	0.00578694	10.6939	Q4/2007	10.6939	10.6939	-2.8918e-05		533.855	13.1895
Q1/2008	2008-03-31	3166.5	301.36	484.028	536.751	369.013	381.488	121401	326.36				Q1/2008	133.5	536.751	536.751	122.477	122.472	0.00555149	2.1876	Q1/2008	2.1873	2.1876	-0.000297912		536.751	2.2354
Q2/2008	2008-06-30	3147.63	307.024	479.48	526.321	365.01	379.114	120029	324.344				Q2/2008	130.91	526.321	526.321	120.101	120.092	0.00923795	-7.54906	Q2/2008	-7.5491	-7.54906	-4.29865e-05		526.321	-9.3268
Q3/2008	2008-09-30	3074.69	285.44	475.144	527.875	354.78	375.848	119242	311.328				Q3/2008	131.29	527.875	527.875	120.45	120.446	0.00328262	1.18627	Q3/2008	1.1866	1.18627	0.000330784		527.875	-0.2449
Q4/2008	2008-12-31	2909.44	277.06	461.084	520.404	339.165	360.344	116167	297.344				Q4/2008	129.43	520.404	520.404	118.743	118.742	0.00153311	-5.54213	Q4/2008	-5.5426	-5.54213	-0.000465277		520.404	-5.2886
Q1/2009	2009-03-31	2727.46	264.704	442.196	474.22	326.864	324.047	110937	277.248				Q1/2009	117.95	474.22	474.22	108.211	108.204	0.00731553	-31.0464	Q1/2009	-31.0461	-31.0464	0.000297552		474.22	-31.6876
Q2/2009	2009-06-30	2662.19	247.524	430.54	473.97	320.843	322.503	108873	258.936				Q2/2009	117.88	473.97	473.97	108.147	108.147	0.000138327	-0.210706	Q2/2009	-0.2113	-0.210706	-0.000594103		473.97	-6.4418
Q3/2009	2009-09-30	2663.06	250.508	427.296	476.527	314.617	332.614	105641	256.736				Q3/2009	118.52	476.527	476.527	108.734	108.73	0.00385866	2.17547	Q3/2009	2.1758	2.17547	0.00033194		476.527	0.837
Q4/2009	2009-12-31	2638.15	246.992	428.54	474.822	323.366	348.287	104943	253.972				Q4/2009	118.1	474.822	474.822	108.349	108.341	0.0075707	-1.42353	Q4/2009	-1.4234	-1.42353	0.000125757		474.822	-0.1189
Q1/2010	2010-03-31	2632.87	258.048	432.84	475.261	317.792	360.57	105770	252.512				Q1/2010	118.21	475.261	475.261	108.45	108.441	0.00832066	0.370336	Q1/2010	0.3706	0.370336	0.000264004		475.261	3.0077
Q2/2010	2010-06-30	2714.08	259.004	438.02	503.944	319.779	368.251	105531	251.408				Q2/2010	125.34	503.944	503.944	114.991	114.986	0.00494953	26.4155	Q2/2010	26.4147	26.4155	-0.000822894		503.944	26.3575
Q3/2010	2010-09-30	2714.9	267.896	443.24	510.914	318.606	372.433	106345	247.408				Q3/2010	127.08	510.914	510.914	116.587	116.576	0.0109214	5.6482	Q3/2010	5.6482	5.6482	9.88081e-07		510.914	4.3771
Q4/2010	2010-12-31	2748.55	270.484	446.436	505.297	321.74	378.995	105891	244.624				Q4/2010	125.68	505.297	505.297	115.303	115.295	0.00815951	-4.32562	Q4/2010	-4.325	-4.32562	0.000617944		505.297	-4.4068
Q1/2011	2011-03-31	2720.77	267.048	446.68	530.721	318.49	383.02	106665	238.688				Q1/2011	132	530.721	530.721	121.101	121.096	0.00528145	21.6965	Q1/2011	21.6963	21.6965	-0.000234382		530.721	24.5847
Q2/2011	2011-06-30	2759.51	264.528	447.92	534.482	315.021	386.329	106035	233.796				Q2/2011	132.94	534.482	534.482	121.963	121.954	0.00951213	2.86491	Q2/2011	2.8647	2.86491	-0.000208821		534.482	-0.3862
Q3/2011	2011-09-30	2839.96	270.68	448.472	539.346	311.686	387.873	107873	229.572				Q3/2011	134.15	539.346	539.346	123.073	123.064	0.0097756	3.69015	Q3/2011	3.6901	3.69015	-5.25277e-05		539.346	1.629
Q4/2011	2011-12-31	2889.76	276.036	455.896	537.591	311.305	391.674	109978	224.8				Q4/2011	133.71	537.591	537.591	122.67	122.663	0.00654761	-1.29524	Q4/2011	-1.2952	-1.29524	3.72449e-05		537.591	2.0133
Q1/2012	2012-03-31	2951.22	277.12	452.148	538.205	291.288	402.64	111213	218.984				Q1/2012	133.86	538.205	538.205	122.807	122.803	0.00406473	0.457636	Q1/2012	0.4578	0.457636	0.000163838		538.205	-1.6983
Q2/2012	2012-06-30	2986.18	272.036	450.98	534.495	286.701	406.778	112036	213.756				Q2/2012	132.94	534.495	534.495	121.963	121.957	0.0065459	-2.72893	Q2/2012	-2.7294	-2.72893	-0.000465962		534.495	-6.5917
Q3/2012	2012-09-30	2974.82	268.988	451.696	536.801	283.062	406.12	111233	208.544				Q3/2012	133.51	536.801	536.801	122.486	122.483	0.0033172	1.73694	Q3/2012	1.7374	1.73694	0.000458539		536.801	-0.2848
Q4/2012	2012-12-31	3001.11	282.508	450.064	531.335	277.722	409.077	111326	205.772				Q4/2012	132.15	531.335	531.335	121.239	121.236	0.00279856	-4.01123	Q4/2012	-4.0111	-4.01123	0.000128454		531.335	-2.6827
Q1/2013	2013-03-31	3034.1	270.156	446.868	512.858	268.999	410.627	112096	204.716				Q1/2013	127.56	512.858	512.858	117.028	117.02	0.00772218	-13.201	Q1/2013	-13.2014	-13.201	-0.000423462		512.858	-5.5616
Q2/2013	2013-06-30	3056.36	281.192	447.74	529.655	267.97	410.526	115500	202.528				Q2/2013	131.74	529.655	529.655	120.862	120.852	0.00998062	13.7585	Q2/2013	13.7591	13.7585	0.000623262		529.655	5.0081
Q3/2013	2013-09-30	3076.13	292.676	448.048	531.862	266.115	411.315	118952	205.304				Q3/2013	132.29	531.862	531.862	121.367	121.356	0.0109923	1.67719	Q3/2013	1.6767	1.67719	-0.000491954		531.862	5.2075
Q4/2013	2013-12-31	3110.07	294.224	450.224	541.69	260.158	413.003	121245	205.32				Q4/2013	134.73	541.69	541.69	123.606	123.598	0.00705068	7.5988	Q4/2013	7.5987	7.5988	-9.89584e-05		541.69	5.658
Q1/2014	2014-03-31	3130.23	300.44	448.088	553.048	261.802	413.992	123358	212.548				Q1/2014	137.55	553.048	553.048	126.193	126.19	0.00262984	8.65458	Q1/2014	8.6549	8.65458	0.000321496		553.048	8.3158
Q2/2014	2014-06-30	3203.18	304.428	447.768	546.529	258.851	417.75	118993	213.92				Q2/2014	135.93	546.529	546.529	124.706	124.703	0.00384413	-4.63225	Q2/2014	-4.6321	-4.63225	0.000148899		546.529	3.9196
Q3/2014	2014-09-30	3262.66	307.896	449.644	543.721	258.105	423.491	119330	214.216				Q3/2014	135.23	543.721	543.721	124.064	124.062	0.00234908	-2.03937	Q3/2014	-2.0394	-2.03937	-3.28063e-05		543.721	4.5346
Q4/2014	2014-12-31	3268.57	306.176	447.728	551.193	261.314	429.248	120400	215.528				Q4/2014	137.09	551.193	551.193	125.771	125.767	0.00387042	5.61129	Q4/2014	5.611	5.61129	-0.000289702		551.193	4.6791
Q1/2015	2015-03-31	3289.17	314.836	449.968	548.084	262.352	410.47	123019	223.156				Q1/2015	136.32	548.084	548.084	125.064	125.057	0.00683494	-2.23718	Q1/2015	-2.2371	-2.23718	7.95991e-05		548.084	4.8158
Q2/2015	2015-06-30	3336.07	319.208	447.98	548.334	264.467	400.86	121980	228.112				Q2/2015	136.38	548.334	548.334	125.119	125.114	0.00483783	0.182579	Q2/2015	0.1831	0.182579	0.000521342		548.334	4.9518
Q3/2015	2015-09-30	3359.4	309.172	452.656	552.898	265.928	393.893	122682	229.468				Q3/2015	137.52	552.898	552.898	126.165	126.156	0.00933269	3.37116	Q3/2015	3.3706	3.37116	-0.000556122		552.898	5.0567
Q4/2015	2015-12-31	3335.46	309.54	458.148	566.738	266.979	392.598	122618	231.208				Q4/2015	140.96	566.738	566.738	129.321	129.314	0.00739645	10.395	Q4/2015	10.3949	10.395	-6.26937e-05		566.738	5.0579
Q1/2016	2016-03-31	3344.98	311.852	462.928	573.808	269.768	389.292	122733	232.676				Q1/2016	142.72	573.808	573.808	130.936	130.927	0.00889979	5.08411	Q1/2016	5.0844	5.08411	0.000287056
Q2/2016	2016-06-30	3343.35	318.04	463.296	566.888	269.149	387.657	123982	236.352				Q2/2016	140.99	566.888	566.888	129.349	129.348	0.000693601	-4.73735	Q2/2016	-4.7373	-4.73735	4.96716e-05
Q3/2016	2016-09-30	3346.61	321.52	464.644	569.746	274.679	389.6	124079	235.744				Q3/2016	141.71	569.746	569.746	130.009	130	0.00912868	2.03193	Q3/2016	2.0321	2.03193	0.000174185
Q4/2016	2016-12-31	3363.41	323.704	467.14	569.646	281.445	384.101	124911	237.536				Q4/2016	141.68	569.646	569.646	129.982	129.977	0.00442293	-0.0701882	Q4/2016	-0.0704	-0.0701882	-0.000211758
Q1/2017	2017-03-31	3423.91	325.82	475.208	584.589	275.62	391.783	125542	244.1				Q1/2017	145.4	584.589	584.589	133.394	133.387	0.00769379	10.913	Q1/2017	10.9132	10.913	0.000226665
Q2/2017	2017-06-30	3442.67	331.296	479.556	593.365	279.882	394.615	127606	245.616				Q2/2017	147.56	593.365	593.365	135.376	135.389	-0.0130917	6.14148	Q2/2017	6.141	6.14148	-0.000481687
Q3/2017	2017-09-30	3454.93	332.968	483.76	595.922	288.794	399.028	127426	248.996				Q3/2017	148.22	595.922	595.922	135.982	135.973	0.00897725	1.7349	Q3/2017	1.7351	1.7349	0.000197581
Q4/2017	2017-12-31	3527.12	336.532	489.292	596.123	293.83	408.291	127407	250.812				Q4/2017	148.59	596.123	596.123	136.321	136.019	0.302564	0.134985	Q4/2017	0.1347	0.134985	-0.000285261
Q1/2018	2018-03-31	3562.32	339.676	492.252	604.11	296.21	410.271	127011	253.922				Q1/2018	151.07	604.11	604.11	138.596	137.841	0.755384	5.46797	Q1/2018	5.4684	5.46797	0.000430332
Q2/2018	2018-06-30	3613.43	340.513	497.033	610.191	298.624	413.554	128573	256.842				Q2/2018		610.191	610.191		139.228	-139.228	4.08762	Q2/2018	4.0878	4.08762	0.000176777
Q3/2018	2018-09-30	3655	341.254	501.983	616.285	301.057	416.932	129218	259.796				Q3/2018		616.285	616.285		140.619	-140.619	4.05506	Q3/2018	4.055	4.05506	-5.87226e-05
Q4/2018	2018-12-31	3697.06	341.941	506.949	622.464	303.511	420.349	129283	262.784				Q4/2018		622.464	622.464		142.029	-142.029	4.0712	Q4/2018	4.0708	4.0712	-0.000401204
Q1/2019	2019-03-31	3738.85	342.551	511.913	628.386	305.762	423.816	129444	265.49				Q1/2019		628.386	628.386		143.38	-143.38	3.86017	Q1/2019	3.8605	3.86017	0.00032598
Q2/2019	2019-06-30	3781.12	343.052	516.876	634.406	308.03	427.055	129543	268.145				Q2/2019		634.406	634.406		144.754	-144.754	3.88746	Q2/2019	3.8875	3.88746	4.09406e-05
Q3/2019	2019-09-30	3823.87	343.47	521.846	640.304	310.315	430.164	129351	270.827				Q3/2019		640.304	640.304		146.099	-146.099	3.77094	Q3/2019	3.771	3.77094	6.4348e-05
Q4/2019	2019-12-31	3867.11	343.892	526.801	646.258	312.616	433.246	128814	273.535				Q4/2019		646.258	646.258		147.458	-147.458	3.77169	Q4/2019	3.7717	3.77169	1.48146e-05

## Sheet: Housing Investment
Q1/1960 !Q mag=bil	.excel_last	Q111IHC@OUTLOOK	Q112IHC@OUTLOOK	Q132ihc@OUTLOOK		Q136ihc@OUTLOOK	Q156ihc@OUTLOOK	Q158ihc@OUTLOOK	Q184ihc@OUTLOOK				GERMANY	Q1/1960 !Q mag=bil	Q134IC@OUTLOOK	Q134IBGV@OUTLOOK	Q134ihc@OUTLOOK			Comparison		Comparison				Q1/1960 !Q	Q134ICP@OUTLOOK		Comparison			(Q134IBGV@OUTLOOK) - historical	(Q134ICP@OUTLOOK) - historical	Germany: Gross Fixed Capital Formation, Housing, Volume(Bil.Ch.2005.EUR)
.DESC		US: Gross Fixed Capital Formation, Housing, Vol(SAAR,Bil.Chn.2009.US$)	UK: Gross Fixed Capital Formation, Housing, Volume(SAAR,Bil.Chn.2015.Pound)	France: Gross Fixed Capital Formation, Housing, Volume(SAAR,Bil.Chn.2010.Euro)	Germany: Gross Fixed Capital Formation, Housing, Volume(Bil.Ch.2010.EUR)	Italy: Gross Fixed Capital Formation, Housing, Volume(SAAR,Bil.Chn.2010.Euro)	Canada: Gross Fixed Capital Formation, Housing, Volume(SAAR,Bil.Chn.2007.C$)	Japan: Gross Fixed Capital Formation, Housing, Volume(SAAR,Bil.Chn.2011.Yen)	Spain: Gross Fixed Capital Formation, Housing, Volume(SAAR,Bil.Chn.2010.Euro)					.DESC	Germany: Gross Fixed Capital Formation, Total, Volume(SAAR,Bil.Chn.2010.Euro)	Germany: Private Non-Res & Gov Fixed Capital Form, Vol(SAAR,Bil.Chn.2010.Euro)	Germany: Gross Fixed Capital Formation, Housing, Volume(SAAR,Bil.Chn.2010.Euro)	Germany: Gross Fixed Capital Formation, Total, Volume(Bil.Ch.2005.EUR)		Comparison	Germany: Gross Fixed Capital Formation, Housing, Volume(Bil.Ch.2010.EUR)					.DESC	Germany: Gross Fixed Capital Formation Growth, Volume (Annualized % Change)					Germany:Private Non-Residential&Govt Fixed Capital Form,Volume(Bil.Ch.2005.EUR)	Germany: Gross Fixed Capital Formation Growth, Volume(Annualized % Change)
.T1		Q1-1960	Q1-1966	Q1-1960	Q1-1960	Q1-1960	Q1-1960	Q1-1960	Q1-1960					.T1	Q1-1991	Q1-1960	Q1-1991									.T1	Q2-1991					Q1-1960	Q2-1960
.TN		Q4-2019	Q4-2019	Q4-2019	Q4-2019	Q4-2019	Q4-2019	Q4-2019	Q4-2019					.TN	Q4-2019	Q4-2019	Q4-2019									.TN	Q4-2019					Q4-2015	Q4-2015
.LSOURCE		Organization for Economic Cooperation & Development	Organization for Economic Cooperation & Development	Organization for Economic Cooperation & Development	Organization for Economic Cooperation & Devt	Organization for Economic Cooperation & Development	Organization for Economic Cooperation & Development	Organization for Economic Cooperation & Development	Organization for Economic Cooperation & Development					.LSOURCE	Organization for Economic Cooperation & Development	Organization for Economic Cooperation & Development	Organization for Economic Cooperation & Development									.LSOURCE	Organization for Economic Cooperation & Development				Historical Germany Series	Organization for Economic Cooperation & Devt	Organization for Economic Cooperation & Devt
.DTLM		May-30-2018 07:53	May-30-2018 09:03	May-30-2018 07:53		May-30-2018 07:53	May-30-2018 07:53	May-30-2018 07:53	May-30-2018 07:53					.DTLM	May-30-2018 07:53	May-30-2018 07:53	May-30-2018 07:53									.DTLM	May-30-2018 07:53					May-09-2014 15:38	May-09-2014 15:38
Q1/1960	1960-03-31	242.73	#N/A	30.396	54.1464	46.361	26.885	3143	16.136					Q1/1960	#N/A	#N/A	#N/A	#N/A			#N/A	#N/A				Q1/1960	#N/A				78.4714	114.687	#N/A	193.159
Q2/1960	1960-06-30	222.768	#N/A	30.835	52.9869	46.871	23.189	3165	16.182					Q2/1960	#N/A	#N/A	#N/A	#N/A	#N/A	#N/A	#N/A	#N/A				Q2/1960	#N/A				76.791	117.285	1.9135	194.076
Q3/1960	1960-09-30	216.013	#N/A	31.561	52.9559	47.816	22.594	3319	16.612					Q3/1960	#N/A	#N/A	#N/A	#N/A	#N/A	#N/A	#N/A	#N/A				Q3/1960	#N/A				76.7462	119.165	3.8359	195.911
Q4/1960	1960-12-31	215.72	#N/A	32.519	52.989	49.132	23.291	3337	17.506					Q4/1960	#N/A	#N/A	#N/A	#N/A	#N/A	#N/A	#N/A	#N/A				Q4/1960	#N/A				76.7941	122.195	6.4352	198.989
Q1/1961	1961-03-31	216.556	#N/A	33.69	52.6471	49.015	23.024	3726	18.864					Q1/1961	#N/A	#N/A	#N/A	#N/A	#N/A	#N/A	#N/A	#N/A				Q1/1961	#N/A				76.2987	127.013	8.9751	203.311
Q2/1961	1961-06-30	217.334	#N/A	34.615	55.3587	50.877	23.641	3517	19.813					Q2/1961	#N/A	#N/A	#N/A	#N/A	#N/A	#N/A	#N/A	#N/A				Q2/1961	#N/A				80.2284	126.692	7.2924	206.921
Q3/1961	1961-09-30	229.078	#N/A	35.255	57.1148	52.892	24.548	3564	20.355					Q3/1961	#N/A	#N/A	#N/A	#N/A	#N/A	#N/A	#N/A	#N/A				Q3/1961	#N/A				82.7735	127.044	5.7181	209.817
Q4/1961	1961-12-31	236.759	#N/A	35.613	57.2311	54.969	23.724	3822	20.557					Q4/1961	#N/A	#N/A	#N/A	#N/A	#N/A	#N/A	#N/A	#N/A				Q4/1961	#N/A				82.942	129.453	5.0044	212.395
Q1/1962	1962-03-31	241.024	#N/A	35.708	56.3517	57.115	23.636	4085	20.417					Q1/1962	#N/A	#N/A	#N/A	#N/A	#N/A	#N/A	#N/A	#N/A				Q1/1962	#N/A				81.6675	132.985	4.3203	214.652
Q2/1962	1962-06-30	248.572	#N/A	35.728	56.9736	59.064	23.931	4190	20.406					Q2/1962	#N/A	#N/A	#N/A	#N/A	#N/A	#N/A	#N/A	#N/A				Q2/1962	#N/A				82.5688	133.618	2.8908	216.187
Q3/1962	1962-09-30	248.361	#N/A	35.707	57.3761	60.912	25.3	4272	20.525					Q3/1962	#N/A	#N/A	#N/A	#N/A	#N/A	#N/A	#N/A	#N/A				Q3/1962	#N/A				83.152	133.847	1.5105	216.999
Q4/1962	1962-12-31	248.035	#N/A	35.678	56.4191	62.676	24.632	4362	20.673					Q4/1962	#N/A	#N/A	#N/A	#N/A	#N/A	#N/A	#N/A	#N/A				Q4/1962	#N/A				81.7652	134.723	-0.9381	216.488
Q1/1963	1963-03-31	257.001	#N/A	36.99	62.162	65.099	23.815	4302	20.852					Q1/1963	#N/A	#N/A	#N/A	#N/A	#N/A	#N/A	#N/A	#N/A				Q1/1963	#N/A				90.088	124.567	-3.3445	214.655
Q2/1963	1963-06-30	275.486	#N/A	38.349	54.4539	66.711	24.709	4770	21.185					Q2/1963	#N/A	#N/A	#N/A	#N/A	#N/A	#N/A	#N/A	#N/A				Q2/1963	#N/A				78.9171	136.583	1.584	215.5
Q3/1963	1963-09-30	280.581	#N/A	42.616	54.456	68.062	24.881	5266	21.673					Q3/1963	#N/A	#N/A	#N/A	#N/A	#N/A	#N/A	#N/A	#N/A				Q3/1963	#N/A				78.9202	140.103	6.7019	219.023
Q4/1963	1963-12-31	289.124	#N/A	40.088	56.8943	68.937	27.5	5663	22.333					Q4/1963	#N/A	#N/A	#N/A	#N/A	#N/A	#N/A	#N/A	#N/A				Q4/1963	#N/A				82.4538	142.932	12.1361	225.386
Q1/1964	1964-03-31	306.837	#N/A	42.203	61.4667	72.632	28.791	6040	23.163					Q1/1964	#N/A	#N/A	#N/A	#N/A	#N/A	#N/A	#N/A	#N/A				Q1/1964	#N/A				89.0804	145.507	17.3585	234.588
Q2/1964	1964-06-30	291.391	#N/A	42.972	62.5515	72.005	27.901	6042	23.942					Q2/1964	#N/A	#N/A	#N/A	#N/A	#N/A	#N/A	#N/A	#N/A				Q2/1964	#N/A				90.6525	151.01	12.6195	241.662
Q3/1964	1964-09-30	286.628	#N/A	44.756	64.8423	70.824	28.588	6293	24.667					Q3/1964	#N/A	#N/A	#N/A	#N/A	#N/A	#N/A	#N/A	#N/A				Q3/1964	#N/A				93.9725	152.637	8.4433	246.609
Q4/1964	1964-12-31	281.404	#N/A	46.76	64.9574	69.437	31.154	6745	25.407					Q4/1964	#N/A	#N/A	#N/A	#N/A	#N/A	#N/A	#N/A	#N/A				Q4/1964	#N/A				94.1393	155.844	5.5868	249.984
Q1/1965	1965-03-31	282.382	#N/A	47.16	65.8695	67.583	30.471	7010	26.16					Q1/1965	#N/A	#N/A	#N/A	#N/A	#N/A	#N/A	#N/A	#N/A				Q1/1965	#N/A				95.4611	156.324	2.9146	251.786
Q2/1965	1965-06-30	284.59	#N/A	48.323	65.8183	66.771	30.14	7485	26.753					Q2/1965	#N/A	#N/A	#N/A	#N/A	#N/A	#N/A	#N/A	#N/A				Q2/1965	#N/A				95.387	158.266	2.9992	253.653
Q3/1965	1965-09-30	285.708	#N/A	48.476	66.1029	66.398	30.653	7761	27.187					Q3/1965	#N/A	#N/A	#N/A	#N/A	#N/A	#N/A	#N/A	#N/A				Q3/1965	#N/A				95.7994	159.785	3.0818	255.585
Q4/1965	1965-12-31	279.521	#N/A	52.753	67.1725	66.406	30.025	8064	27.373					Q4/1965	#N/A	#N/A	#N/A	#N/A	#N/A	#N/A	#N/A	#N/A				Q4/1965	#N/A				97.3494	160.392	3.4189	257.742
Q1/1966	1966-03-31	285.868	41.15	53.26	66.6374	64.812	30.167	7654	27.313					Q1/1966	#N/A	#N/A	#N/A	#N/A	#N/A	#N/A	#N/A	#N/A				Q1/1966	#N/A				96.5741	163.55	3.7485	260.124
Q2/1966	1966-06-30	262.939	39.783	54.94	67.6887	65.414	31.037	8086	27.704					Q2/1966	#N/A	#N/A	#N/A	#N/A	#N/A	#N/A	#N/A	#N/A				Q2/1966	#N/A				98.0976	162.036	0.0151	260.134
Q3/1966	1966-09-30	254.389	39.921	54.715	68.9006	66.252	27.698	8298	28.548					Q3/1966	#N/A	#N/A	#N/A	#N/A	#N/A	#N/A	#N/A	#N/A				Q3/1966	#N/A				99.854	157.917	-3.5836	257.771
Q4/1966	1966-12-31	227.699	38.887	54.417	68.4008	67.299	27.161	8090	29.777					Q4/1966	#N/A	#N/A	#N/A	#N/A	#N/A	#N/A	#N/A	#N/A				Q4/1966	#N/A				99.1296	153.306	-8.0258	252.436
Q1/1967	1967-03-31	220.854	38.376	56.164	68.1101	67.17	28.159	8826	31.393					Q1/1967	#N/A	#N/A	#N/A	#N/A	#N/A	#N/A	#N/A	#N/A				Q1/1967	#N/A				98.7082	145.419	-12.5292	244.127
Q2/1967	1967-06-30	245.96	40.607	57.913	66.6295	68.583	28.756	9332	33.091					Q2/1967	#N/A	#N/A	#N/A	#N/A	#N/A	#N/A	#N/A	#N/A				Q2/1967	#N/A				96.5625	142.484	-8.0683	239.047
Q3/1967	1967-09-30	258.291	41.49	59.631	66.2136	70.32	30.769	9576	34.873					Q3/1967	#N/A	#N/A	#N/A	#N/A	#N/A	#N/A	#N/A	#N/A				Q3/1967	#N/A				95.9597	141.234	-3.0647	237.194
Q4/1967	1967-12-31	273.34	42.503	60.065	62.1837	72.555	30.811	10548	36.99					Q4/1967	#N/A	#N/A	#N/A	#N/A	#N/A	#N/A	#N/A	#N/A				Q4/1967	#N/A				90.1196	147.73	1.1109	237.85
Q1/1968	1968-03-31	275.006	46.869	62.673	69.3251	72.676	31.211	11039	39.442					Q1/1968	#N/A	#N/A	#N/A	#N/A	#N/A	#N/A	#N/A	#N/A				Q1/1968	#N/A				100.469	145.226	13.8613	245.695
Q2/1968	1968-06-30	281.954	47.621	62.696	64.186	76.271	33.934	11206	41.022					Q2/1968	#N/A	#N/A	#N/A	#N/A	#N/A	#N/A	#N/A	#N/A				Q2/1968	#N/A				93.0213	146.815	-9.203	239.836
Q3/1968	1968-09-30	287.018	51.927	65.223	64.334	79.939	33.397	11034	41.73					Q3/1968	#N/A	#N/A	#N/A	#N/A	#N/A	#N/A	#N/A	#N/A				Q3/1968	#N/A				93.2358	152.381	9.9956	245.617
Q4/1968	1968-12-31	290.593	55.682	64.908	67.5854	82.91	36.172	12478	41.596					Q4/1968	#N/A	#N/A	#N/A	#N/A	#N/A	#N/A	#N/A	#N/A				Q4/1968	#N/A				97.9478	160.711	22.9912	258.659
Q1/1969	1969-03-31	301.059	49.462	64.595	70.3252	91.539	37.123	12133	40.62					Q1/1969	#N/A	#N/A	#N/A	#N/A	#N/A	#N/A	#N/A	#N/A				Q1/1969	#N/A				101.919	163.335	10.595	265.253
Q2/1969	1969-06-30	297.821	47.928	65.638	68.2322	91.076	38.99	12962	39.831					Q2/1969	#N/A	#N/A	#N/A	#N/A	#N/A	#N/A	#N/A	#N/A				Q2/1969	#N/A				98.8852	169.459	4.7437	268.345
Q3/1969	1969-09-30	295.395	49.633	67.75	68.306	89.238	38.473	14024	39.23					Q3/1969	#N/A	#N/A	#N/A	#N/A	#N/A	#N/A	#N/A	#N/A				Q3/1969	#N/A				98.9922	176.815	11.5961	275.807
Q4/1969	1969-12-31	273.793	50.115	73.093	68.2535	86.89	37.828	14296	38.65					Q4/1969	#N/A	#N/A	#N/A	#N/A	#N/A	#N/A	#N/A	#N/A				Q4/1969	#N/A				98.9161	176.176	-1.0331	275.092
Q1/1970	1970-03-31	274.336	48.854	70.517	71.795	82.93	36.691	14956	38.092					Q1/1970	#N/A	#N/A	#N/A	#N/A	#N/A	#N/A	#N/A	#N/A				Q1/1970	#N/A				104.049	166.808	-6.018	270.856
Q2/1970	1970-06-30	256.055	48.933	73.042	67.6298	83.07	32.538	15192	37.521					Q2/1970	#N/A	#N/A	#N/A	#N/A	#N/A	#N/A	#N/A	#N/A				Q2/1970	#N/A				98.0122	195.093	37.1327	293.106
Q3/1970	1970-09-30	269.694	50.994	75.312	70.6855	83.156	33.947	15149	36.937					Q3/1970	#N/A	#N/A	#N/A	#N/A	#N/A	#N/A	#N/A	#N/A				Q3/1970	#N/A				102.441	206.386	23.2433	308.827
Q4/1970	1970-12-31	298.121	53.973	72.858	75.0016	83.019	36.735	15201	36.237					Q4/1970	#N/A	#N/A	#N/A	#N/A	#N/A	#N/A	#N/A	#N/A				Q4/1970	#N/A				108.696	200.042	-0.115	308.738
Q1/1971	1971-03-31	314.039	54.775	78.946	76.9729	82.657	36.804	15718	35.422					Q1/1971	#N/A	#N/A	#N/A	#N/A	#N/A	#N/A	#N/A	#N/A				Q1/1971	#N/A				111.553	192.578	-5.8375	304.13
Q2/1971	1971-06-30	345.73	61.849	78.437	82.5814	82.701	39.804	15685	35.141					Q2/1971	#N/A	#N/A	#N/A	#N/A	#N/A	#N/A	#N/A	#N/A				Q2/1971	#N/A				119.681	195.153	14.8377	314.833
Q3/1971	1971-09-30	362.765	66.428	77.376	85.0751	82.05	41.514	15765	35.394					Q3/1971	#N/A	#N/A	#N/A	#N/A	#N/A	#N/A	#N/A	#N/A				Q3/1971	#N/A				123.295	191.316	-0.2819	314.611
Q4/1971	1971-12-31	376.826	68.688	77.518	91.7929	81.403	42.632	16185	36.173					Q4/1971	#N/A	#N/A	#N/A	#N/A	#N/A	#N/A	#N/A	#N/A				Q4/1971	#N/A				133.03	182.158	0.7362	315.189
Q1/1972	1972-03-31	401.958	70.01	81.38	95.167	80.541	43.327	17195	37.479					Q1/1972	#N/A	#N/A	#N/A	#N/A	#N/A	#N/A	#N/A	#N/A				Q1/1972	#N/A				137.92	177.734	0.593	315.655
Q2/1972	1972-06-30	409.838	74.177	83.115	98.8877	79.628	44.217	18434	38.71					Q2/1972	#N/A	#N/A	#N/A	#N/A	#N/A	#N/A	#N/A	#N/A				Q2/1972	#N/A				143.313	172.92	0.7337	316.232
Q3/1972	1972-09-30	410.795	75.231	84.901	103.085	80.226	44.33	19432	39.866					Q3/1972	#N/A	#N/A	#N/A	#N/A	#N/A	#N/A	#N/A	#N/A				Q3/1972	#N/A				149.395	173.721	8.995	323.116
Q4/1972	1972-12-31	425.475	72.593	86.765	106.735	80.133	43.803	19724	41.102					Q4/1972	#N/A	#N/A	#N/A	#N/A	#N/A	#N/A	#N/A	#N/A				Q4/1972	#N/A				154.685	171.85	4.3008	326.535
Q1/1973	1973-03-31	439.758	72.225	88.472	106.227	79.333	46.393	20476	42.418					Q1/1973	#N/A	#N/A	#N/A	#N/A	#N/A	#N/A	#N/A	#N/A				Q1/1973	#N/A				153.949	176.694	5.1284	330.643
Q2/1973	1973-06-30	417.405	68.933	91.041	107.78	78.955	47.328	21542	43.486					Q2/1973	#N/A	#N/A	#N/A	#N/A	#N/A	#N/A	#N/A	#N/A				Q2/1973	#N/A				156.2	169.292	-6.0882	325.492
Q3/1973	1973-09-30	399.711	63.745	93.14	103.309	78.855	46.456	21473	44.306					Q3/1973	#N/A	#N/A	#N/A	#N/A	#N/A	#N/A	#N/A	#N/A				Q3/1973	#N/A				149.721	171.818	-4.7696	321.539
Q4/1973	1973-12-31	380.606	61.933	95.366	97.5572	79.567	47.968	22730	44.985					Q4/1973	#N/A	#N/A	#N/A	#N/A	#N/A	#N/A	#N/A	#N/A				Q4/1973	#N/A				141.384	171.05	-10.854	312.435
Q1/1974	1974-03-31	352.709	57.735	97.737	84.8663	80.234	52.103	20992	45.524					Q1/1974	#N/A	#N/A	#N/A	#N/A	#N/A	#N/A	#N/A	#N/A				Q1/1974	#N/A				122.992	189.52	0.0999	312.513
Q2/1974	1974-06-30	337.307	55.249	97.813	81.5797	80.569	48.166	17219	45.603					Q2/1974	#N/A	#N/A	#N/A	#N/A	#N/A	#N/A	#N/A	#N/A				Q2/1974	#N/A				118.229	176.697	-20.6798	294.926
Q3/1974	1974-09-30	326.178	48.321	97.386	74.7087	80.722	45.447	18705	45.224					Q3/1974	#N/A	#N/A	#N/A	#N/A	#N/A	#N/A	#N/A	#N/A				Q3/1974	#N/A				108.271	181.859	-6.3481	290.13
Q4/1974	1974-12-31	283.256	50.123	95.708	71.8622	79.282	42.871	18687	44.25					Q4/1974	#N/A	#N/A	#N/A	#N/A	#N/A	#N/A	#N/A	#N/A				Q4/1974	#N/A				104.146	181.854	-5.5737	286
Q1/1975	1975-03-31	265.76	49.815	92.881	71.267	78.153	41.675	16862	42.679					Q1/1975	#N/A	#N/A	#N/A	#N/A	#N/A	#N/A	#N/A	#N/A				Q1/1975	#N/A				103.283	191.465	12.809	294.749
Q2/1975	1975-06-30	271.476	49.534	90.493	64.1749	77.586	43.162	19171	41.652					Q2/1975	#N/A	#N/A	#N/A	#N/A	#N/A	#N/A	#N/A	#N/A				Q2/1975	#N/A				93.0052	176.696	-29.8987	269.702
Q3/1975	1975-09-30	290.396	46.081	89.117	66.5031	77.041	48.471	20014	41.17					Q3/1975	#N/A	#N/A	#N/A	#N/A	#N/A	#N/A	#N/A	#N/A				Q3/1975	#N/A				96.3794	182.026	13.5481	278.406
Q4/1975	1975-12-31	303.115	43.352	88.58	71.8848	74.74	51.033	20453	41.162					Q4/1975	#N/A	#N/A	#N/A	#N/A	#N/A	#N/A	#N/A	#N/A				Q4/1975	#N/A				104.179	183.642	14.2286	287.821
Q1/1976	1976-03-31	334.095	49.101	88.592	71.2153	71.852	52.817	21317	41.627					Q1/1976	#N/A	#N/A	#N/A	#N/A	#N/A	#N/A	#N/A	#N/A				Q1/1976	#N/A				103.208	181.848	-3.7867	285.056
Q2/1976	1976-06-30	343.699	47.058	91.426	72.2234	70.378	57.126	20638	41.848					Q2/1976	#N/A	#N/A	#N/A	#N/A	#N/A	#N/A	#N/A	#N/A				Q2/1976	#N/A				104.67	184.872	6.4439	289.542
Q3/1976	1976-09-30	338.08	46.037	89.418	73.6375	70.249	58.045	21221	41.823					Q3/1976	#N/A	#N/A	#N/A	#N/A	#N/A	#N/A	#N/A	#N/A				Q3/1976	#N/A				106.719	178.782	-5.467	285.501
Q4/1976	1976-12-31	381.155	48.54	90.547	79.2475	70.566	55.913	20003	41.664					Q4/1976	#N/A	#N/A	#N/A	#N/A	#N/A	#N/A	#N/A	#N/A				Q4/1976	#N/A				114.849	181.62	16.2764	296.469
Q1/1977	1977-03-31	392.668	49.577	88.918	82.3352	71.093	56.448	21348	41.372					Q1/1977	#N/A	#N/A	#N/A	#N/A	#N/A	#N/A	#N/A	#N/A				Q1/1977	#N/A				119.324	188.526	16.2614	307.85
Q2/1977	1977-06-30	437.595	53.893	89.392	80.7009	71.151	56.994	20665	40.995					Q2/1977	#N/A	#N/A	#N/A	#N/A	#N/A	#N/A	#N/A	#N/A				Q2/1977	#N/A				116.955	181.968	-11.1036	298.923
Q3/1977	1977-09-30	436.215	55.699	89.933	81.1533	70.598	57.314	20227	40.535					Q3/1977	#N/A	#N/A	#N/A	#N/A	#N/A	#N/A	#N/A	#N/A				Q3/1977	#N/A				117.611	183.222	2.58	300.833
Q4/1977	1977-12-31	430.468	58.779	90.725	80.7921	70.357	56.728	21389	39.967					Q4/1977	#N/A	#N/A	#N/A	#N/A	#N/A	#N/A	#N/A	#N/A				Q4/1977	#N/A				117.088	188.319	6.2221	305.407
Q1/1978	1978-03-31	432.607	64.061	94.17	83.4965	70.402	57.223	22639	39.293					Q1/1978	#N/A	#N/A	#N/A	#N/A	#N/A	#N/A	#N/A	#N/A				Q1/1978	#N/A				121.007	193.027	11.7861	314.034
Q2/1978	1978-06-30	453.398	63.828	95.174	82.2633	70.142	58.125	22039	38.597					Q2/1978	#N/A	#N/A	#N/A	#N/A	#N/A	#N/A	#N/A	#N/A				Q2/1978	#N/A				119.22	191.749	-3.8465	310.969
Q3/1978	1978-09-30	459.7	66.457	96.947	85.7331	70.523	57.419	21622	37.879					Q3/1978	#N/A	#N/A	#N/A	#N/A	#N/A	#N/A	#N/A	#N/A				Q3/1978	#N/A				124.248	199.378	17.3023	323.626
Q4/1978	1978-12-31	458.085	69.114	97.885	86.1767	71.258	57.345	21973	37.076					Q4/1978	#N/A	#N/A	#N/A	#N/A	#N/A	#N/A	#N/A	#N/A				Q4/1978	#N/A				124.891	200.379	2.0466	325.27
Q1/1979	1979-03-31	447.371	74.217	98.371	87.5709	71.79	57.277	21054	36.187					Q1/1979	#N/A	#N/A	#N/A	#N/A	#N/A	#N/A	#N/A	#N/A				Q1/1979	#N/A				126.912	190.551	-9.2602	317.463
Q2/1979	1979-06-30	439.025	76.991	97.961	93.8684	72.293	56.336	22375	35.511					Q2/1979	#N/A	#N/A	#N/A	#N/A	#N/A	#N/A	#N/A	#N/A				Q2/1979	#N/A				136.038	207.362	36.9081	343.4
Q3/1979	1979-09-30	433.802	77.993	98.757	93.7068	72.435	57.772	22756	35.047					Q3/1979	#N/A	#N/A	#N/A	#N/A	#N/A	#N/A	#N/A	#N/A				Q3/1979	#N/A				135.804	209.639	2.4011	345.443
Q4/1979	1979-12-31	417.405	83.444	99.921	95.4153	74.451	57.641	21318	34.782					Q4/1979	#N/A	#N/A	#N/A	#N/A	#N/A	#N/A	#N/A	#N/A				Q4/1979	#N/A				138.28	211.426	5.0291	349.707
Q1/1980	1980-03-31	385.49	77.646	101.281	97.3147	76.382	56.409	20524	35.113					Q1/1980	#N/A	#N/A	#N/A	#N/A	#N/A	#N/A	#N/A	#N/A				Q1/1980	#N/A				141.033	214.658	7.0222	355.691
Q2/1980	1980-06-30	314.155	72.167	99.927	99.6393	76.667	51.131	20256	34.456					Q2/1980	#N/A	#N/A	#N/A	#N/A	#N/A	#N/A	#N/A	#N/A				Q2/1980	#N/A				144.402	205.16	-6.7161	349.562
Q3/1980	1980-09-30	319.519	70.93	98.342	96.6645	75.853	54.122	19604	34.174					Q3/1980	#N/A	#N/A	#N/A	#N/A	#N/A	#N/A	#N/A	#N/A				Q3/1980	#N/A				140.091	203.875	-6.2512	343.966
Q4/1980	1980-12-31	350.749	71.62	97.861	95.9069	75.863	56.734	19100	34.619					Q4/1980	#N/A	#N/A	#N/A	#N/A	#N/A	#N/A	#N/A	#N/A				Q4/1980	#N/A				138.993	198.178	-7.6708	337.171
Q1/1981	1981-03-31	344.46	68.366	96.578	95.3188	76.158	59.329	19206	34.839					Q1/1981	#N/A	#N/A	#N/A	#N/A	#N/A	#N/A	#N/A	#N/A				Q1/1981	#N/A				138.14	198.898	-0.1574	337.038
Q2/1981	1981-06-30	332.812	72.371	96.711	98.3589	77.24	61.919	19565	34.824					Q2/1981	#N/A	#N/A	#N/A	#N/A	#N/A	#N/A	#N/A	#N/A				Q2/1981	#N/A				142.546	200.399	7.1967	342.945
Q3/1981	1981-09-30	307.144	75.957	96.293	94.135	76.709	57.437	19701	34.971					Q3/1981	#N/A	#N/A	#N/A	#N/A	#N/A	#N/A	#N/A	#N/A				Q3/1981	#N/A				136.425	194.662	-13.1298	331.087
Q4/1981	1981-12-31	275.678	74.077	95.159	89.2809	74.03	52.684	18837	34.665					Q4/1981	#N/A	#N/A	#N/A	#N/A	#N/A	#N/A	#N/A	#N/A				Q4/1981	#N/A				129.39	183.4	-20.34	312.79
Q1/1982	1982-03-31	259.791	73.012	92.558	92.1658	73.691	51.616	18556	34.554					Q1/1982	#N/A	#N/A	#N/A	#N/A	#N/A	#N/A	#N/A	#N/A				Q1/1982	#N/A				133.571	183.549	5.654	317.12
Q2/1982	1982-06-30	251.58	80.653	90.491	90.1345	71.881	45.971	18838	34.506					Q2/1982	#N/A	#N/A	#N/A	#N/A	#N/A	#N/A	#N/A	#N/A				Q2/1982	#N/A				130.627	186.582	0.1121	317.209
Q3/1982	1982-09-30	250.781	80.123	89.883	89.9308	71.101	45.309	19259	34.208					Q3/1982	#N/A	#N/A	#N/A	#N/A	#N/A	#N/A	#N/A	#N/A				Q3/1982	#N/A				130.332	181.282	-6.8714	311.614
Q4/1982	1982-12-31	269.151	81.394	87.473	92.4204	72.971	49.502	19736	34.02					Q4/1982	#N/A	#N/A	#N/A	#N/A	#N/A	#N/A	#N/A	#N/A				Q4/1982	#N/A				133.94	179.628	2.5319	313.567
Q1/1983	1983-03-31	315.017	83.212	87.899	95.161	74.144	52.363	19727	33.476					Q1/1983	#N/A	#N/A	#N/A	#N/A	#N/A	#N/A	#N/A	#N/A				Q1/1983	#N/A				137.912	175.789	0.1704	313.701
Q2/1983	1983-06-30	352.338	84.943	87.294	99.5073	75.873	58.214	17636	33.266					Q2/1983	#N/A	#N/A	#N/A	#N/A	#N/A	#N/A	#N/A	#N/A				Q2/1983	#N/A				144.211	180.237	14.4237	324.448
Q3/1983	1983-09-30	387.246	83.757	86.848	101.392	77.619	58.234	17621	32.763					Q3/1983	#N/A	#N/A	#N/A	#N/A	#N/A	#N/A	#N/A	#N/A				Q3/1983	#N/A				146.942	177.906	0.4937	324.848
Q4/1983	1983-12-31	403.6	85.921	85.633	102.742	77.695	55.481	17756	32.092					Q4/1983	#N/A	#N/A	#N/A	#N/A	#N/A	#N/A	#N/A	#N/A				Q4/1983	#N/A				148.898	182.699	8.5744	331.598
Q1/1984	1984-03-31	414.825	88.706	84.66	102.189	77.035	55.563	17800	31.667					Q1/1984	#N/A	#N/A	#N/A	#N/A	#N/A	#N/A	#N/A	#N/A				Q1/1984	#N/A				148.097	171.921	-13.2535	320.018
Q2/1984	1984-06-30	422.5	86.293	84.939	103.484	76.987	55.487	17665	31.546					Q2/1984	#N/A	#N/A	#N/A	#N/A	#N/A	#N/A	#N/A	#N/A				Q2/1984	#N/A				149.973	162.762	-8.7974	312.735
Q3/1984	1984-09-30	418.439	83.732	82.41	103.592	76.943	56.648	17777	31.704					Q3/1984	#N/A	#N/A	#N/A	#N/A	#N/A	#N/A	#N/A	#N/A				Q3/1984	#N/A				150.13	180.457	24.8651	330.588
Q4/1984	1984-12-31	418.872	82.386	81.239	101.405	76.519	56.933	17635	31.974					Q4/1984	#N/A	#N/A	#N/A	#N/A	#N/A	#N/A	#N/A	#N/A				Q4/1984	#N/A				146.961	188.911	6.5494	335.872
Q1/1985	1985-03-31	417.571	89.349	80.501	94.8134	74.776	56.73	17858	33.068					Q1/1985	#N/A	#N/A	#N/A	#N/A	#N/A	#N/A	#N/A	#N/A				Q1/1985	#N/A				137.408	177.425	-22.7992	314.833
Q2/1985	1985-06-30	420.904	81.659	79.051	96.2026	75.289	58.084	18527	33.725					Q2/1985	#N/A	#N/A	#N/A	#N/A	#N/A	#N/A	#N/A	#N/A				Q2/1985	#N/A				139.421	189.579	19.2516	329
Q3/1985	1985-09-30	426.255	80.393	80.053	95.2753	74.178	62.548	18421	34.596					Q3/1985	#N/A	#N/A	#N/A	#N/A	#N/A	#N/A	#N/A	#N/A				Q3/1985	#N/A				138.077	193.632	3.3346	331.709
Q4/1985	1985-12-31	436.401	79.008	80.67	95.4555	73.727	66.433	18044	35.08					Q4/1985	#N/A	#N/A	#N/A	#N/A	#N/A	#N/A	#N/A	#N/A				Q4/1985	#N/A				138.339	202.919	12.0211	341.257
Q1/1986	1986-03-31	455.045	76.05	80.868	96.869	74.145	65.63	18409	35.197					Q1/1986	#N/A	#N/A	#N/A	#N/A	#N/A	#N/A	#N/A	#N/A				Q1/1986	#N/A				140.387	192.288	-9.6869	332.675
Q2/1986	1986-06-30	480.306	74.519	80.799	90.5079	71.472	67.817	19005	35.37					Q2/1986	#N/A	#N/A	#N/A	#N/A	#N/A	#N/A	#N/A	#N/A				Q2/1986	#N/A				131.168	205.192	4.5062	336.361
Q3/1986	1986-09-30	487.7	80.014	80.695	93.1414	71.482	69.26	19885	35.247					Q3/1986	#N/A	#N/A	#N/A	#N/A	#N/A	#N/A	#N/A	#N/A				Q3/1986	#N/A				134.985	204.351	3.5857	339.336
Q4/1986	1986-12-31	486.818	87.491	81.252	95.2578	71.607	70.578	20569	35.564					Q4/1986	#N/A	#N/A	#N/A	#N/A	#N/A	#N/A	#N/A	#N/A				Q4/1986	#N/A				138.052	213.053	14.611	351.105
Q1/1987	1987-03-31	485.541	84.604	82.976	91.9995	70.519	74.468	20983	36.091					Q1/1987	#N/A	#N/A	#N/A	#N/A	#N/A	#N/A	#N/A	#N/A				Q1/1987	#N/A				133.33	190.907	-27.2719	324.237
Q2/1987	1987-06-30	487.667	91.314	82.991	93.9319	70.97	77.283	22489	37.179					Q2/1987	#N/A	#N/A	#N/A	#N/A	#N/A	#N/A	#N/A	#N/A				Q2/1987	#N/A				136.13	213.553	35.2858	349.684
Q3/1987	1987-09-30	486.193	100.104	84.157	93.6684	70.413	80.591	24247	38.47					Q3/1987	#N/A	#N/A	#N/A	#N/A	#N/A	#N/A	#N/A	#N/A				Q3/1987	#N/A				135.749	215.978	2.3574	351.727
Q4/1987	1987-12-31	488.58	98.007	84.073	97.107	69.67	79.754	26089	39.751					Q4/1987	#N/A	#N/A	#N/A	#N/A	#N/A	#N/A	#N/A	#N/A				Q4/1987	#N/A				140.732	215.791	5.5671	356.523
Q1/1988	1988-03-31	478	109.813	85.883	96.4218	70.815	78.955	27192	41.698					Q1/1988	#N/A	#N/A	#N/A	#N/A	#N/A	#N/A	#N/A	#N/A				Q1/1988	#N/A				139.739	211.611	-5.6789	351.35
Q2/1988	1988-06-30	481.806	114.504	86.499	99.2223	72.038	80.057	26424	42.494					Q2/1988	#N/A	#N/A	#N/A	#N/A	#N/A	#N/A	#N/A	#N/A				Q2/1988	#N/A				143.798	215.279	9.0912	359.077
Q3/1988	1988-09-30	482.099	117.309	88.42	100.061	72.221	79.38	25796	43.835					Q3/1988	#N/A	#N/A	#N/A	#N/A	#N/A	#N/A	#N/A	#N/A				Q3/1988	#N/A				145.014	220.28	7.1075	365.294
Q4/1988	1988-12-31	486.327	113.925	91.568	102.932	72.552	80.666	26566	42.293					Q4/1988	#N/A	#N/A	#N/A	#N/A	#N/A	#N/A	#N/A	#N/A				Q4/1988	#N/A				149.175	219.805	4.0975	368.979
Q1/1989	1989-03-31	483.154	116.734	92.178	105.037	72.77	84.374	26790	44.686					Q1/1989	#N/A	#N/A	#N/A	#N/A	#N/A	#N/A	#N/A	#N/A				Q1/1989	#N/A				152.224	234.764	20.999	386.988
Q2/1989	1989-06-30	468.831	108.202	95.617	105.95	72.338	81.192	26021	43.392					Q2/1989	#N/A	#N/A	#N/A	#N/A	#N/A	#N/A	#N/A	#N/A				Q2/1989	#N/A				153.547	223.937	-9.4672	377.484
Q3/1989	1989-09-30	463.723	103.184	96.075	109.458	74.527	81.631	25834	43.897					Q3/1989	#N/A	#N/A	#N/A	#N/A	#N/A	#N/A	#N/A	#N/A				Q3/1989	#N/A				158.632	231.287	13.842	389.919
Q4/1989	1989-12-31	453.985	97.305	96.313	112.029	76.185	84.285	26094	45.823					Q4/1989	#N/A	#N/A	#N/A	#N/A	#N/A	#N/A	#N/A	#N/A				Q4/1989	#N/A				162.357	235.2	8.0693	397.558
Q1/1990	1990-03-31	458.641	95.842	95.696	113.804	76.563	82.125	26388	46.461					Q1/1990	#N/A	#N/A	#N/A	#N/A	#N/A	#N/A	#N/A	#N/A				Q1/1990	#N/A				164.93	252.557	21.6102	417.487
Q2/1990	1990-06-30	440.924	93.569	94.606	120.54	76.874	77.227	26960	47.646					Q2/1990	#N/A	#N/A	#N/A	#N/A	#N/A	#N/A	#N/A	#N/A				Q2/1990	#N/A				174.693	240.84	-1.8591	415.533
Q3/1990	1990-09-30	415.92	93.144	92.796	122.64	76.466	72.179	27885	48.311					Q3/1990	#N/A	#N/A	#N/A	#N/A	#N/A	#N/A	#N/A	#N/A				Q3/1990	#N/A				177.736	244.192	6.2995	421.928
Q4/1990	1990-12-31	392.917	91.492	92.295	125.053	76.668	66.644	27800	48.243					Q4/1990	#N/A	#N/A	#N/A	#N/A	#N/A	#N/A	#N/A	#N/A				Q4/1990	#N/A				181.232	249.489	8.6001	430.721
Q1/1991	1991-03-31	369.485	87.882	89.817	127.55	78.098	62.198	27553	47.688					Q1/1991	438.266	310.716	127.55	438.266	#N/A	#N/A	127.55	-0.0001				Q1/1991	#N/A				184.852	253.415	7.1935	438.266
Q2/1991	1991-06-30	378.2	83.779	88.481	125.569	78.916	63.171	26517	47.044					Q2/1991	440.272	314.703	125.569	440.272	1.84346	0.000160049	125.569	0.0001				Q2/1991	1.8433	1.84346	-0.000160049		185.024	255.248	1.4902	440.272
Q3/1991	1991-09-30	393.917	81.553	87.7	124.838	79.488	64.94	25076	46.066					Q3/1991	445.237	320.399	124.838	445.237	4.58773	0.000627173	124.838	-0.0001				Q3/1991	4.5871	4.58773	-0.000627173		188.447	256.79	2.8996	445.237
Q4/1991	1991-12-31	402.49	81.527	84.826	132.317	79.819	66.791	24146	44.816					Q4/1991	457.522	325.205	132.317	457.522	11.5021	-0.000528266	132.317	-0.0001				Q4/1991	11.5026	11.5021	0.000528266		195.342	262.18	11.3883	457.522
Q1/1992	1992-03-31	423.064	82.475	85.552	139.961	79.636	68.551	24104	46.656					Q1/1992	467.3	327.339	139.961	467.3	8.82663	-0.000166153	139.961	0.0004				Q1/1992	8.8268	8.82663	0.000166153		199.612	267.688	12.4916	467.3
Q2/1992	1992-06-30	439.21	80.706	83.953	138.252	79.592	67.72	24659	45.046					Q2/1992	463.69	325.438	138.252	463.69	-3.05447	0.000331432	138.252	0				Q2/1992	-3.0548	-3.05447	-0.000331432		198.836	264.854	-3.3614	463.69
Q3/1992	1992-09-30	440.353	83.252	83.444	135.263	79.135	69.733	24481	44.334					Q3/1992	454.062	318.799	135.263	454.062	-8.05043	-0.00012818	135.263	-0.0001				Q3/1992	-8.0503	-8.05043	0.00012818		197.594	256.469	-9.3181	454.062
Q4/1992	1992-12-31	455.212	78.977	82.088	144.357	78.67	69.062	24171	43.859					Q4/1992	453.51	309.153	144.357	453.51	-0.485391	-0.000391177	144.357	0.0003				Q4/1992	-0.485	-0.485391	0.000391177		202.96	250.55	0.3688	453.51
Q1/1993	1993-03-31	457.355	80.62	81.02	143.885	78.5	66.062	23644	43.495					Q1/1993	444.296	300.411	143.885	444.296	-7.8825	-2.11365e-07	143.885	0				Q1/1993	-7.8825	-7.8825	2.11365e-07		200.446	243.85	-8.0534	444.296
Q2/1993	1993-06-30	462.642	85.533	79.876	143.361	77.989	66.079	23895	43.608					Q2/1993	438.53	295.169	143.361	438.53	-5.09095	0.0006492	143.361	-0.0001				Q2/1993	-5.0916	-5.09095	-0.0006492		199.275	239.255	-4.8357	438.53
Q3/1993	1993-09-30	478.644	86.631	79.316	146.471	77.9	66.291	24891	43.256					Q3/1993	441.689	295.218	146.47	441.689	2.91273	-0.000170164	146.471	-0.0006				Q3/1993	2.9129	2.91273	0.000170164		204.432	237.257	2.3449	441.689
Q4/1993	1993-12-31	502.791	92.137	79.828	150.038	78.258	66.619	26466	43.965					Q4/1993	435.07	285.032	150.037	435.07	-5.86086	0.000237936	150.038	-0.0008				Q4/1993	-5.8611	-5.86086	-0.000237936		204.709	230.361	-5.3519	435.07
Q1/1994	1994-03-31	512.649	86.281	81.331	158.774	77.825	69.372	24863	43.16					Q1/1994	448.834	290.06	158.773	448.834	13.2678	-0.000306285	158.774	-0.0005				Q1/1994	13.2681	13.2678	0.000306285		213.26	235.575	14.7941	448.834
Q2/1994	1994-06-30	529.938	84.636	82.65	163.973	77.521	70.738	26056	43.969					Q2/1994	454.4	290.427	163.973	454.4	5.05344	-0.000555074	163.973	-0.0001				Q2/1994	5.054	5.05344	0.000555074		217.62	236.78	6.1032	454.4
Q3/1994	1994-09-30	524.365	82.878	83.879	162.932	77.287	69.191	28431	44.587					Q3/1994	456.406	293.474	162.932	456.406	1.77757	7.28057e-05	162.932	0.0004				Q3/1994	1.7775	1.77757	-7.28057e-05		217.859	238.547	2.2081	456.406
Q4/1994	1994-12-31	517.65	81.591	84.951	168.907	77.654	66.116	27109	45.202					Q4/1994	466.236	297.329	168.906	466.236	8.89748	0.000781584	168.907	-0.0006				Q4/1994	8.8967	8.89748	-0.000781584		223.628	242.608	8.8721	466.236
Q1/1995	1995-03-31	506.077	80.037	85.425	163.738	77.589	61.668	26095	45.64					Q1/1995	454.764	291.026	163.738	454.764	-9.48489	-0.000387702	163.738	0.0004				Q1/1995	-9.4845	-9.48489	0.000387702		218.703	236.061	-10.2882	454.764
Q2/1995	1995-06-30	489.932	77.937	84.909	169.239	77.381	58.315	25277	47.376					Q2/1995	462.787	293.548	169.239	462.787	7.2458	-0.000200252	169.239	0.0005				Q2/1995	7.246	7.2458	0.000200252		223.293	239.494	8.0634	462.787
Q3/1995	1995-09-30	505.22	75.632	84.615	163.371	77.741	57.694	24647	49.1					Q3/1995	457.923	294.552	163.371	457.923	-4.13828	2.19433e-05	163.371	0				Q3/1995	-4.1383	-4.13828	-2.19433e-05		218.94	238.983	-4.8821	457.923
Q4/1995	1995-12-31	516.65	74.829	84.082	162.309	80.212	57.9	25301	48.936					Q4/1995	454.714	292.405	162.309	454.714	-2.77376	0.000236191	162.309	-0.0003				Q4/1995	-2.774	-2.77376	-0.000236191		217.741	236.973	-3.8125	454.714
Q1/1996	1996-03-31	530.224	81.54	84.297	151.986	76.213	59.689	26369	51.932					Q1/1996	430.093	278.107	151.986	430.093	-19.962	9.37592e-05	151.986	0				Q1/1996	-19.9621	-19.962	-9.37592e-05		205.594	224.499	-19.779	430.093
Q2/1996	1996-06-30	552.656	84.066	84.659	169.164	77.751	62.928	27744	51.26					Q2/1996	464.693	295.529	169.164	464.693	36.2746	3.41744e-05	169.164	0.0002				Q2/1996	36.2746	36.2746	-3.41744e-05		223.618	241.075	37.9915	464.693
Q3/1996	1996-09-30	551.084	84.69	85.587	168.257	76.62	66.656	28885	50.416					Q3/1996	464.091	295.834	168.257	464.091	-0.517185	-0.00018549	168.257	0				Q3/1996	-0.517	-0.517185	0.00018549		224.379	239.712	-1.6164	464.091
Q4/1996	1996-12-31	545.512	89.269	86.189	169.029	74.464	68.84	29533	50.592					Q4/1996	465.244	296.215	169.03	465.244	0.99748	-0.000319819	169.029	0.0007				Q4/1996	0.9978	0.99748	0.000319819		224.563	240.681	1.2405	465.244
Q1/1997	1997-03-31	547.369	68.16	86.678	160.691	73.77	68.935	28316	52.16					Q1/1997	450.777	290.086	160.691	450.777	-11.87	0.000220632	160.691	0.0001				Q1/1997	-11.8702	-11.87	-0.000220632		216.507	234.27	-12.4819	450.777
Q2/1997	1997-06-30	554.227	70.988	87.951	167.091	73.454	69.696	25242	52.756					Q2/1997	460.506	293.415	167.091	460.506	8.91663	0.000325282	167.091	-0.0002				Q2/1997	8.9163	8.91663	-0.000325282		221.807	238.699	10.3105	460.506
Q3/1997	1997-09-30	556.799	69.552	89.015	166.186	74.127	70.122	23467	51.856					Q3/1997	461.158	294.972	166.186	461.158	0.567537	3.74419e-05	166.186	-0.0004				Q3/1997	0.5675	0.567537	-3.74419e-05		220.89	240.268	1.0455	461.158
Q4/1997	1997-12-31	562.371	74	89.94	165.854	78.664	70.312	22408	52.684					Q4/1997	465.119	299.265	165.855	465.119	3.48022	-0.00058206	165.854	0.0006				Q4/1997	3.4808	3.48022	0.00058206		220.488	244.631	3.9321	465.119
Q1/1998	1998-03-31	574.087	69.924	90.66	168.368	74.746	68.386	22355	55.472					Q1/1998	477.392	309.024	168.368	477.392	10.9799	0.000273383	168.368	0.0002				Q1/1998	10.9796	10.9799	-0.000273383		226.494	250.898	9.7768	477.392
Q2/1998	1998-06-30	589.947	71.88	91.948	164.615	74.208	67.298	21881	55.408					Q2/1998	471.374	306.759	164.616	471.374	-4.94785	-0.000349162	164.615	0.0008				Q2/1998	-4.9475	-4.94785	0.000349162		220.865	250.509	-4.2599	471.374
Q3/1998	1998-09-30	605.949	72.092	93.587	165.604	74.157	66.51	21293	60.052					Q3/1998	477.292	311.688	165.604	477.292	5.11728	0.000682311	165.604	-0.0003				Q3/1998	5.1166	5.11728	-0.000682311		222.566	254.726	5.544	477.292
Q4/1998	1998-12-31	620.523	71.96	95.277	162.202	74.889	65.803	20622	60.348					Q4/1998	474.584	312.382	162.202	474.584	-2.25023	-0.000128856	162.202	-0.0001				Q4/1998	-2.2501	-2.25023	0.000128856		220.131	254.453	-3.1997	474.584
Q1/1999	1999-03-31	622.958	73.552	98.004	163.95	75.307	66.95	20526	59.904					Q1/1999	488.311	324.361	163.95	488.311	12.0814	-0.000170699	163.95	0.0002				Q1/1999	12.0816	12.0814	0.000170699		225.117	263.194	10.6533	488.311
Q2/1999	1999-06-30	632.66	73.24	99.333	167.014	75.68	69.466	22029	62.772					Q2/1999	492.523	325.509	167.014	492.523	3.49516	-0.000141451	167.014	-0.0002				Q2/1999	3.4953	3.49516	0.000141451		227.533	264.99	4.587	492.523
Q3/1999	1999-09-30	637.415	76.904	100.768	169.921	75.945	70.294	22362	64.964					Q3/1999	502.001	332.08	169.92	502.001	7.92257	0.000566461	169.921	-0.0006				Q3/1999	7.922	7.92257	-0.000566461		230.497	271.504	9.3026	502.001
Q4/1999	1999-12-31	642.067	77.152	101.97	167.255	76.677	71.274	21326	68.8					Q4/1999	500.145	332.89	167.256	500.145	-1.4707	-0.000500123	167.255	0.0006				Q4/1999	-1.4702	-1.4707	0.000500123		229.203	270.942	-2.6131	500.145
Q1/2000	2000-03-31	645.257	80.356	103.472	166.352	79.683	70.271	21360	77.208					Q1/2000	509.485	343.133	166.352	509.485	7.6817	0.000395002	166.352	0.0002				Q1/2000	7.6813	7.6817	-0.000395002		228.027	281.458	9.6273	509.485
Q2/2000	2000-06-30	641.947	81.78	103.818	164.283	79.66	70.755	21813	77.592					Q2/2000	508.933	344.65	164.283	508.933	-0.432675	-0.000274998	164.283	-0.0002				Q2/2000	-0.4324	-0.432675	0.000274998		226.095	282.838	-0.6474	508.933
Q3/2000	2000-09-30	631.964	76.208	103.92	161.989	80.853	73.829	21284	79.28					Q3/2000	513.496	351.507	161.989	513.496	3.63485	-0.000252855	161.989	0.0004				Q3/2000	3.6351	3.63485	0.000252855		225.083	288.413	3.5126	513.496
Q4/2000	2000-12-31	632.615	76.96	103.997	157.6	79.972	75.199	21834	80.04					Q4/2000	509.735	352.135	157.601	509.735	-2.89769	9.39382e-06	157.6	0.0006				Q4/2000	-2.8977	-2.89769	-9.39382e-06		221.853	287.882	-3.8462	509.735
Q1/2001	2001-03-31	635.333	78.356	104.348	155.203	81.103	77.314	21712	81.84					Q1/2001	511.391	356.188	155.203	511.391	1.30585	0.0007451	155.203	-0.0004				Q1/2001	1.3051	1.30585	-0.0007451		221.371	290.02	0.1261	511.391
Q2/2001	2001-06-30	645.175	78.38	104.285	153.959	81.651	79.073	20314	83.024					Q2/2001	502.113	348.154	153.96	502.113	-7.06195	-0.000653358	153.959	0.0009				Q2/2001	-7.0613	-7.06195	0.000653358		219.186	282.927	-7.8203	502.113
Q3/2001	2001-09-30	649.193	80.44	104.731	152.684	80.878	81.134	20172	84.916					Q3/2001	493.94	341.256	152.684	493.94	-6.35363	0.000565564	152.684	-0.0002				Q3/2001	-6.3542	-6.35363	-0.000565564		217.654	276.286	-7.1415	493.94
Q4/2001	2001-12-31	645.028	76.904	105.553	151.835	81.234	84.731	20265	85.248					Q4/2001	488.674	336.839	151.835	488.674	-4.19677	-0.000472092	151.835	0.0003				Q4/2001	-4.1963	-4.19677	0.000472092		216.471	272.203	-4.5428	488.674
Q1/2002	2002-03-31	666.173	79.82	106.449	148.286	83.473	89.533	20057	87.428					Q1/2002	479.335	331.049	148.286	479.335	-7.428	0.000197274	148.286	-0.0003				Q1/2002	-7.4282	-7.428	-0.000197274		212.821	266.514	-8.115	479.335
Q2/2002	2002-06-30	682.712	83.892	107.346	143.335	80.235	91.138	20174	89.016					Q2/2002	469.055	325.72	143.335	469.055	-8.30651	-0.000207761	143.335	0				Q2/2002	-8.3063	-8.30651	0.000207761		206.743	262.312	-8.601	469.055
Q3/2002	2002-09-30	684.731	84.18	108.21	142.876	84.229	92.754	20024	89.612					Q3/2002	467.3	324.424	142.876	467.3	-1.48825	5.246e-05	142.876	0.0001				Q3/2002	-1.4883	-1.48825	-5.246e-05		205.045	262.255	-0.8709	467.3
Q4/2002	2002-12-31	697.06	91.552	109.027	141.992	86.614	94.788	19691	91.12					Q4/2002	464.743	322.751	141.992	464.743	-2.17084	0.000355457	141.992	-0.0003				Q4/2002	-2.1712	-2.17084	-0.000355457		203.537	261.206	-1.7006	464.743
Q1/2003	2003-03-31	709.797	86.968	109.452	140.335	86.67	94.005	19488	94.412					Q1/2003	465.044	324.709	140.335	465.044	0.25932	0.000119709	140.335	0				Q1/2003	0.2592	0.25932	-0.000119709		203.645	261.399	-0.8566	465.044
Q2/2003	2003-06-30	720.996	86.996	110.007	141.128	86.74	92.591	19641	95.612					Q2/2003	463.289	322.161	141.127	463.289	-1.50101	8.9045e-05	141.128	-0.0008				Q2/2003	-1.5011	-1.50101	-8.9045e-05		203.132	260.157	-0.5596	463.289
Q3/2003	2003-09-30	762.348	89.384	111.084	142.116	86.769	96.511	20082	97.72					Q3/2003	463.64	321.524	142.115	463.64	0.303395	-4.84766e-06	142.116	-0.0006				Q3/2003	0.3034	0.303395	4.84766e-06		203.175	260.465	0.7644	463.64
Q4/2003	2003-12-31	785.001	92.236	112.049	141.654	87.414	97.932	19670	98.828					Q4/2003	462.787	321.133	141.654	462.787	-0.733887	-0.000487391	141.654	-0.0002				Q4/2003	-0.7334	-0.733887	0.000487391		201.85	260.937	-0.3998	462.787
Q1/2004	2004-03-31	794.183	95.7	113.654	139.736	88.079	100.587	19760	99.06					Q1/2004	462.399	322.663	139.736	462.399	-0.334938	0.000462048	139.736	-0.0005				Q1/2004	-0.3354	-0.334938	-0.000462048		203.954	258.445	-2.9527	462.399
Q2/2004	2004-06-30	819.482	95.524	114.749	136.479	88.632	102.727	20188	101.26					Q2/2004	457.835	321.356	136.479	457.835	-3.89004	-0.000535846	136.479	0.0003				Q2/2004	-3.8895	-3.89004	0.000535846		198.911	258.924	-2.7971	457.835
Q3/2004	2004-09-30	825.261	95.052	115.483	133.36	89.224	103.656	20201	101.7					Q3/2004	460.293	326.933	133.36	460.293	2.16485	0.000754597	133.36	0.0001				Q3/2004	2.1641	2.16485	-0.000754597		196.561	263.732	1.5956	460.293
Q4/2004	2004-12-31	836.661	92.764	116.373	131.879	90.33	105.731	20077	103.488					Q4/2004	456.833	324.954	131.879	456.833	-2.97305	5.26916e-05	131.879	-0.0004				Q4/2004	-2.9731	-2.97305	-5.26916e-05		194.405	262.428	-3.2412	456.833
Q1/2005	2005-03-31	856.407	90.744	117.725	127.131	91.029	105.682	19922	104.976					Q1/2005	452.068	324.937	127.131	452.068	-4.10738	-0.000778413	127.131	0.0001				Q1/2005	-4.1066	-4.10738	0.000778413		190.127	261.941	-2.8785	452.068
Q2/2005	2005-06-30	872.294	102.784	119.584	129.734	93.782	108.759	19628	107.812					Q2/2005	459.691	329.957	129.734	459.691	6.91754	0.000735445	129.734	-0.0004				Q2/2005	6.9168	6.91754	-0.000735445		193.125	266.566	6.359	459.691
Q3/2005	2005-09-30	881.881	96.156	120.751	131.04	96.058	109.105	20017	109.184					Q3/2005	466.31	335.27	131.04	466.31	5.88511	-0.000285225	131.04	0				Q3/2005	5.8854	5.88511	0.000285225		196.522	269.788	4.1134	466.31
Q4/2005	2005-12-31	879.861	98.56	122.181	131.415	97.44	109.484	20259	109.824					Q4/2005	477.342	345.927	131.415	477.342	9.80438	-0.00021655	131.415	0.0001				Q4/2005	9.8046	9.80438	0.00021655		196.777	280.565	11.5815	477.342
Q1/2006	2006-03-31	871.657	101.476	123.79	129.258	98.509	113.421	20129	112.96					Q1/2006	474.81	345.552	129.258	474.81	-2.10493	7.30183e-05	129.258	0.0002				Q1/2006	-2.105	-2.10493	-7.30183e-05		194.608	280.202	-0.5932	474.81
Q2/2006	2006-06-30	827.827	96.48	125.622	138.558	98.454	112.038	19985	114.632					Q2/2006	502.891	364.333	138.557	502.891	25.8392	0.000522116	138.558	-0.0006				Q2/2006	25.8387	25.8392	-0.000522116		204.765	298.126	28.6336	502.891
Q3/2006	2006-09-30	781.646	96.196	126.565	141.815	97.607	108.936	20106	115.584					Q3/2006	506.401	364.586	141.814	506.401	2.82122	-7.70204e-05	141.815	-0.0006				Q3/2006	2.8213	2.82122	7.70204e-05		208.584	297.817	1.6245	506.401
Q4/2006	2006-12-31	745.152	98.276	127.811	145.037	103.273	108.832	20196	117.424					Q4/2006	522.296	377.259	145.037	522.296	13.1589	-0.000435525	145.037	0.0002				Q4/2006	13.1593	13.1589	0.000435525		213.457	308.839	13.2587	522.296
Q1/2007	2007-03-31	711.154	100.864	129.034	140.13	102.398	113.13	19917	115.952					Q1/2007	521.018	380.888	140.13	521.018	-0.975169	0.000131159	140.13	0				Q1/2007	-0.9753	-0.975169	-0.000131159		205.865	315.153	2.8651	521.018
Q2/2007	2007-06-30	682.691	99.772	129.433	134.119	100.418	113.806	19555	117.256					Q2/2007	517.658	383.539	134.12	517.658	-2.55472	-0.000119406	134.119	0.0006				Q2/2007	-2.5546	-2.55472	0.000119406		202.306	315.352	-4.1893	517.658
Q3/2007	2007-09-30	639.186	98.768	129.302	135.778	99.464	113.615	17808	116.892					Q3/2007	520.466	384.688	135.778	520.466	2.18749	-0.000109079	135.778	0.0004				Q3/2007	2.1876	2.18749	0.000109079		204.382	316.084	1.2862	520.466
Q4/2007	2007-12-31	586.106	95.224	129.142	136.14	99.407	114.186	15457	116.624					Q4/2007	533.855	397.715	136.14	533.855	10.6939	2.8918e-05	136.14	0.0001				Q4/2007	10.6939	10.6939	-2.8918e-05		204.417	329.438	13.1895	533.855
Q1/2008	2008-03-31	540.012	90.112	128.454	136.843	103.168	113.175	16026	114.088					Q1/2008	536.751	399.908	136.844	536.751	2.1876	0.000297912	136.843	0.0005				Q1/2008	2.1873	2.1876	-0.000297912		205.207	331.544	2.2354	536.751
Q2/2008	2008-06-30	516.336	87.432	126.261	129.711	99.861	110.905	16866	109.564					Q2/2008	526.321	396.61	129.711	526.321	-7.54906	4.29865e-05	129.711	-0.0001				Q2/2008	-7.5491	-7.54906	-4.29865e-05		199.833	326.488	-9.3268	526.321
Q3/2008	2008-09-30	490.895	73.364	123.111	128.376	98.24	108.883	17530	103.508					Q3/2008	527.875	399.499	128.377	527.875	1.18627	-0.000330784	128.376	0.0007				Q3/2008	1.1866	1.18627	0.000330784		200.231	327.644	-0.2449	527.875
Q4/2008	2008-12-31	443.568	68.084	118.67	129.312	92.932	103.091	17525	96.532					Q4/2008	520.404	391.092	129.312	520.404	-5.54213	0.000465277	129.312	0.0002				Q4/2008	-5.5426	-5.54213	-0.000465277		199.358	321.046	-5.2886	520.404
Q1/2009	2009-03-31	400.967	64.296	113.018	126.348	90.971	96.835	16049	91.896					Q1/2009	474.22	347.872	126.349	474.22	-31.0464	-0.000297552	126.348	0.0008				Q1/2009	-31.0461	-31.0464	0.000297552		191.729	282.491	-31.6876	474.22
Q2/2009	2009-06-30	376.951	61.896	109.347	126.35	89.923	100.056	14390	85.212					Q2/2009	473.97	347.62	126.35	473.97	-0.210706	0.000594103	126.35	-0.0004				Q2/2009	-0.2113	-0.210706	-0.000594103		197.431	276.539	-6.4418	473.97
Q3/2009	2009-09-30	395.385	61.16	107.61	126.724	87.947	103.751	13395	81.172					Q3/2009	476.527	349.803	126.724	476.527	2.17547	-0.00033194	126.724	0.0001				Q3/2009	2.1758	2.17547	0.00033194		199.11	277.417	0.837	476.527
Q4/2009	2009-12-31	395.667	58.676	107.359	127.831	88.856	110.129	12950	79.56					Q4/2009	474.822	346.991	127.831	474.822	-1.42353	-0.000125757	127.831	0.0002				Q4/2009	-1.4234	-1.42353	0.000125757		198.03	276.792	-0.1189	474.822
Q1/2010	2010-03-31	382.964	60.72	108.511	126.737	89.227	112.834	13372	77.096					Q1/2010	475.261	348.524	126.737	475.261	0.370336	-0.000264004	126.737	0.0002				Q1/2010	0.3706	0.370336	0.000264004		196.511	278.75	3.0077	475.261
Q2/2010	2010-06-30	403.504	65.14	110.223	136.005	90.398	111.464	13584	76.412					Q2/2010	503.944	367.939	136.005	503.944	26.4155	0.000822894	136.005	-0.0004				Q2/2010	26.4147	26.4155	-0.000822894		208.868	295.076	26.3575	503.944
Q3/2010	2010-09-30	368.102	67.084	112.247	134.148	89.465	109.316	13665	74.188					Q3/2010	510.914	376.766	134.148	510.914	5.6482	-9.88081e-07	134.148	-0.0002				Q3/2010	5.6482	5.6482	9.88081e-07		209.034	301.88	4.3771	510.914
Q4/2010	2010-12-31	375.121	66.576	113.271	131.207	88.048	108.691	14073	71.016					Q4/2010	505.297	374.09	131.207	505.297	-4.32562	-0.000617944	131.207	0.0001				Q4/2010	-4.325	-4.32562	0.000617944		205.16	300.137	-4.4068	505.297
Q1/2011	2011-03-31	374.392	66.924	113.022	143.194	86.383	110.424	14236	68.796					Q1/2011	530.721	387.527	143.194	530.721	21.6965	0.000234382	143.194	-0.0003				Q1/2011	21.6963	21.6965	-0.000234382		218.68	312.041	24.5847	530.721
Q2/2011	2011-06-30	379.329	67.304	112.618	145.867	83.543	110.344	14009	65.936					Q2/2011	534.482	388.615	145.867	534.482	2.86491	0.000208821	145.867	0.0004				Q2/2011	2.8647	2.86491	-0.000208821		223.896	310.586	-0.3862	534.482
Q3/2011	2011-09-30	386.771	66.504	111.688	145.157	82.046	113.129	14712	62.92					Q3/2011	539.346	394.189	145.157	539.346	3.69015	5.25277e-05	145.157	0.0002				Q3/2011	3.6901	3.69015	-5.25277e-05		225.784	313.562	1.629	539.346
Q4/2011	2011-12-31	397.594	68.232	112.001	146.971	82.136	114.217	14396	61.408					Q4/2011	537.591	390.62	146.971	537.591	-1.29524	-3.72449e-05	146.971	-0.0005				Q4/2011	-1.2952	-1.29524	3.72449e-05		223.558	314.033	2.0133	537.591
Q1/2012	2012-03-31	422.467	68.112	110.812	150.554	77.037	119.173	14021	60.108					Q1/2012	538.205	387.651	150.554	538.205	0.457636	-0.000163838	150.554	0.0005				Q1/2012	0.4578	0.457636	0.000163838		228.045	310.16	-1.6983	538.205
Q2/2012	2012-06-30	426.327	64.696	110.232	151.812	77.319	118.884	14635	58.888					Q2/2012	534.495	382.683	151.811	534.495	-2.72893	0.000465962	151.812	-0.0005				Q2/2012	-2.7294	-2.72893	-0.000465962		231.53	302.965	-6.5917	534.495
Q3/2012	2012-09-30	437.269	64.184	109.698	152.891	77.226	118.175	14913	57.04					Q3/2012	536.801	383.91	152.891	536.801	1.73694	-0.000458539	152.891	-0.0003				Q3/2012	1.7374	1.73694	0.000458539		234.461	302.34	-0.2848	536.801
Q4/2012	2012-12-31	459.818	66.256	109.425	150.549	76.804	118.055	15223	56.316					Q4/2012	531.335	380.786	150.549	531.335	-4.01123	-0.000128454	150.549	0.0001				Q4/2012	-4.0111	-4.01123	0.000128454		229.967	301.368	-2.6827	531.335
Q1/2013	2013-03-31	475.908	67.544	109.696	144.947	74.35	117.638	15338	54.296					Q1/2013	512.858	367.911	144.946	512.858	-13.201	0.000423462	144.947	-0.0006				Q1/2013	-13.2014	-13.201	-0.000423462		217.313	295.545	-5.5616	512.858
Q2/2013	2013-06-30	489.54	71.576	109.978	150.3	74.512	119.443	15515	52.54					Q2/2013	529.655	379.355	150.301	529.655	13.7585	-0.000623262	150.3	0.0005				Q2/2013	13.7591	13.7585	0.000623262		229.822	299.833	5.0081	529.655
Q3/2013	2013-09-30	496.753	73.736	109.964	153.596	74.041	118.701	16019	51.156					Q3/2013	531.862	378.266	153.596	531.862	1.67719	0.000491954	153.596	-0.0003				Q3/2013	1.6767	1.67719	-0.000491954		230.149	301.713	5.2075	531.862
Q4/2013	2013-12-31	491.086	75.456	109.206	152.561	71.728	118.629	16636	50.636					Q4/2013	541.69	389.129	152.561	541.69	7.5988	9.89584e-05	152.561	-0.0001				Q4/2013	7.5987	7.5988	-9.89584e-05		235.284	306.406	5.658	541.69
Q1/2014	2014-03-31	487.602	77.52	108.143	158.899	70.806	117.962	16925	58.812					Q1/2014	553.048	394.149	158.898	553.048	8.65458	-0.000321496	158.899	-0.0005				Q1/2014	8.6549	8.65458	0.000321496		241.899	311.149	8.3158	553.048
Q2/2014	2014-06-30	502.956	79.292	107.131	153.479	68.8	120.964	15345	58.696					Q2/2014	546.529	393.05	153.479	546.529	-4.63225	-0.000148899	153.479	0				Q2/2014	-4.6321	-4.63225	0.000148899		232.069	314.46	3.9196	546.529
Q3/2014	2014-09-30	508.485	81.424	106.259	153.949	67.712	123.636	14222	57.784					Q3/2014	543.721	389.772	153.949	543.721	-2.03937	3.28063e-05	153.949	0.0004				Q3/2014	-2.0394	-2.03937	-3.28063e-05		225.577	318.144	4.5346	543.721
Q4/2014	2014-12-31	521.805	80.76	105.365	154.04	67.343	123.995	14311	56.844					Q4/2014	551.193	397.153	154.04	551.193	5.61129	0.000289702	154.04	0.0001				Q4/2014	5.611	5.61129	-0.000289702		229.23	321.963	4.6791	551.193
Q1/2015	2015-03-31	536.077	80.792	104.788	152.586	67.003	124.712	14733	57.548					Q1/2015	548.084	395.498	152.586	548.084	-2.23718	-7.95991e-05	152.586	-0.0004				Q1/2015	-2.2371	-2.23718	7.95991e-05		222.138	325.946	4.8158	548.084
Q2/2015	2015-06-30	551.122	83.832	104.476	152.365	67.107	124.943	15004	57.588					Q2/2015	548.334	395.969	152.365	548.334	0.182579	-0.000521342	152.365	0.0003				Q2/2015	0.1831	0.182579	0.000521342		218.236	330.098	4.9518	548.334
Q3/2015	2015-09-30	565.21	83.116	104.583	152.834	67.437	126.631	15232	56.996					Q3/2015	552.898	400.065	152.833	552.898	3.37116	0.000556122	152.834	-0.0005				Q3/2015	3.3706	3.37116	-0.000556122		218.477	334.421	5.0567	552.898
Q4/2015	2015-12-31	575.319	85.08	105.163	155.46	68.335	127.152	15198	57.6					Q4/2015	566.738	411.279	155.459	566.738	10.395	6.26937e-05	155.46	-0.0005				Q4/2015	10.3949	10.395	-6.26937e-05		227.936	338.802	5.0579	566.738
Q1/2016	2016-03-31	593.718	87.68	105.743	158.191	68.842	129.518	15413	59.8					Q1/2016	573.808	415.617	158.191	573.808	5.08411	-0.000287056	158.191	0.0004				Q1/2016	5.0844
Q2/2016	2016-06-30	586.54	87.56	106.484	158.372	69.432	130.285	15747	59.528					Q2/2016	566.888	408.516	158.372	566.888	-4.73735	-4.96716e-05	158.372	0.0003				Q2/2016	-4.7373
Q3/2016	2016-09-30	579.754	88.632	107.659	159	69.623	129.337	16145	59.596					Q3/2016	569.746	410.746	159	569.746	2.03193	-0.000174185	159	0.0004				Q3/2016	2.0321
Q4/2016	2016-12-31	589.767	92.196	109.162	160.75	69.875	130.697	16267	60.816					Q4/2016	569.646	408.896	160.751	569.646	-0.0701882	0.000211758	160.75	0.0005				Q4/2016	-0.0704
Q1/2017	2017-03-31	605.508	97.092	111.091	162.825	70.423	133.303	16457	63.448					Q1/2017	584.589	421.764	162.825	584.589	10.913	-0.000226665	162.825	0.0005				Q1/2017	10.9132
Q2/2017	2017-06-30	594.101	93.776	112.618	165.611	70.561	132.453	16606	64.544					Q2/2017	593.365	427.754	165.611	593.365	6.14148	0.000481687	165.611	-0.0005				Q2/2017	6.141
Q3/2017	2017-09-30	587.012	95.468	113.608	165.919	71.148	132.395	16326	65.052					Q3/2017	595.922	430.003	165.919	595.922	1.7349	-0.000197581	165.919	0.0002				Q3/2017	1.7351
Q4/2017	2017-12-31	604.949	96.092	114.236	164.797	71.884	136.56	15882	66.608					Q4/2017	596.123	431.326	164.797	596.123	0.134985	0.000285261	164.797	-0.0002				Q4/2017	0.1347
Q1/2018	2018-03-31	604.993	97.86	114.796	167.017	72.064	135.524	15545	67.774					Q1/2018	604.11	437.093	167.017	604.11	5.46797	-0.000430332	167.017	-0.0002				Q1/2018	5.4684
Q2/2018	2018-06-30	611.687	98.349	115.36	168.419	72.244	135.862	15641	68.722					Q2/2018	610.191	441.772	168.419	610.191	4.08762	-0.000176777	168.419	0.0001				Q2/2018	4.0878
Q3/2018	2018-09-30	618.456	98.349	116.04	169.75	72.424	136.2	15757	69.547					Q3/2018	616.285	446.535	169.751	616.285	4.05506	5.87226e-05	169.75	0.0005				Q3/2018	4.055
Q4/2018	2018-12-31	625.299	98.251	116.724	171.052	72.604	136.539	15874	70.312					Q4/2018	622.464	451.412	171.051	622.464	4.0712	0.000401204	171.052	-0.0006				Q4/2018	4.0708
Q1/2019	2019-03-31	631.46	98.153	117.436	172.362	72.785	136.947	16021	71.015					Q1/2019	628.386	456.024	172.362	628.386	3.86017	-0.00032598	172.362	0.0004				Q1/2019	3.8605
Q2/2019	2019-06-30	637.682	98.035	118.199	173.682	72.966	137.356	16172	71.725					Q2/2019	634.406	460.724	173.682	634.406	3.88746	-4.09406e-05	173.682	-0.0001				Q2/2019	3.8875
Q3/2019	2019-09-30	643.965	97.888	119.027	174.928	73.148	137.766	16072	72.443					Q3/2019	640.304	465.376	174.928	640.304	3.77094	-6.4348e-05	174.928	0.0002				Q3/2019	3.771
Q4/2019	2019-12-31	650.311	97.741	119.86	176.182	73.33	138.178	15702	73.167					Q4/2019	646.258	470.076	176.183	646.258	3.77169	-1.48146e-05	176.182	0.0006				Q4/2019	3.7717

## Sheet: Total Non-Res GFCF
Q1/1960 !Q mag=bil	.excel_last	Q111IBGV@OUTLOOK		Q132ibgv@OUTLOOK		Q136ibgv@OUTLOOK	Q156ibgv@OUTLOOK	Q158ibgv@OUTLOOK	Q184ibgv@OUTLOOK		Q134IBGV@OUTLOOK		(Q134IBGV@OUTLOOK) - historical	Comparison		Q112IBGV@OUTLOOK		(Q112IBGV@OUTLOOK) - historical	Comparison
.DESC		US: Private Non-Res & Gov Fixed Capital Formation, Volume(SAAR,Bil.Chn.2009.US$)	UK: Private Non-Res & Gov Fixed Capital Formation, Vol(SAAR,Bil.Chn.2015.Pound)	France: Private Non-Res & Gov Fixed Capital Form, Volume(SAAR,Bil.Chn.2010.Euro)	Germany: Government Final Consumption Expenditure, Volume(Bil.Ch.2010.EUR)	Italy: Private Non-Res & Gov Fixed Cap Formation, Vol(SAAR,Bil.Chn.2010.Euro)	Canada: Private Non-Res & Gov Fixed Capital Formation, Vol(SAAR,Bil.Chn.2007.C$)	Japan: Private Non-Res & Gov Fixed Capital Formation, Vol(SAAR,Bil.Chn.2011.Yen)	Spain: Private Non-Res & Gov Fixed Cap Formation, Vol(SAAR,Bil.Chn.2010.Euro)		Germany: Private Non-Res & Gov Fixed Capital Form, Vol(SAAR,Bil.Chn.2010.Euro)		Germany:Private Non-Residential&Govt Fixed Capital Form,Volume(Bil.Ch.2005.EUR)			UK: Private Non-Res & Gov Fixed Capital Formation, Vol(SAAR,Bil.Chn.2015.Pound)		UK: Private Non-Residential&Govt Fixed Capital Formation,Volume(Bil.Ch.2010.GBP)
.T1		Q1-1960	Q1-1966	Q1-1960	Q1-1960	Q1-1960	Q1-1961	Q1-1960	Q1-1960		Q1-1960		Q1-1960			Q1-1969		Q1-1966
.TN		Q4-2019	Q4-2019	Q4-2019	Q4-2019	Q4-2019	Q4-2019	Q4-2019	Q4-2019		Q4-2019		Q4-2015			Q4-2019		Q4-2015
.LSOURCE		Organization for Economic Cooperation & Development	Organization for Economic Cooperation & Development	Organization for Economic Cooperation & Development	Organization for Economic Cooperation & Devt	Organization for Economic Cooperation & Development	Organization for Economic Cooperation & Development	Organization for Economic Cooperation & Development	Organization for Economic Cooperation & Development		Organization for Economic Cooperation & Development	Historical Germany Series	Organization for Economic Cooperation & Devt			Organization for Economic Cooperation & Development	Historical UK Series	Organization for Economic Cooperation & Devt
.DTLM		May-30-2018 07:53	May-30-2018 07:53	May-30-2018 07:53		May-30-2018 07:53	May-30-2018 07:53	May-30-2018 07:53	May-30-2018 07:53		May-30-2018 07:53		May-09-2014 15:38			May-30-2018 07:53		May-09-2014 15:38
Q1/1960	1960-03-31	315.187	#N/A	59.7403	140.62	62.4887	#N/A	8707	10.5202		#N/A	114.687	114.687	#N/A		#N/A	#N/A	#N/A	#N/A
Q2/1960	1960-06-30	325.924	#N/A	61.7291	143.805	66.7614	#N/A	8829	11.2336		#N/A	117.285	117.285	#N/A		#N/A	#N/A	#N/A	#N/A
Q3/1960	1960-09-30	328.947	#N/A	63.4671	146.11	69.3763	#N/A	9544	11.7633		#N/A	119.165	119.165	#N/A		#N/A	#N/A	#N/A	#N/A
Q4/1960	1960-12-31	327.146	#N/A	64.7168	149.826	67.6159	#N/A	10295	12.1415		#N/A	122.195	122.195	#N/A		#N/A	#N/A	#N/A	#N/A
Q1/1961	1961-03-31	334.509	#N/A	68.6863	155.733	73.3497	29.587	10856	12.3681		#N/A	127.013	127.013	#N/A		#N/A	#N/A	#N/A	#N/A
Q2/1961	1961-06-30	331.549	#N/A	68.3933	155.34	72.9341	30.324	11323	12.7771		#N/A	126.692	126.692	#N/A		#N/A	#N/A	#N/A	#N/A
Q3/1961	1961-09-30	335.457	#N/A	70.5171	155.771	77.3157	31.236	12201	13.3684		#N/A	127.044	127.044	#N/A		#N/A	#N/A	#N/A	#N/A
Q4/1961	1961-12-31	348.425	#N/A	71.7952	158.724	77.8525	32.126	12967	14.1212		#N/A	129.453	129.453	#N/A		#N/A	#N/A	#N/A	#N/A
Q1/1962	1962-03-31	354.305	#N/A	73.8915	163.055	79.934	33.052	13105	15.0354		#N/A	132.985	132.985	#N/A		#N/A	#N/A	#N/A	#N/A
Q2/1962	1962-06-30	356.622	#N/A	74.9239	163.832	79.0977	32.464	13380	15.9028		#N/A	133.618	133.618	#N/A		#N/A	#N/A	#N/A	#N/A
Q3/1962	1962-09-30	364.843	#N/A	77.4052	164.112	78.8071	32.915	13691	16.7233		#N/A	133.847	133.847	#N/A		#N/A	#N/A	#N/A	#N/A
Q4/1962	1962-12-31	361.419	#N/A	77.2545	165.186	81.3252	33.113	13943	17.5291		#N/A	134.723	134.723	#N/A		#N/A	#N/A	#N/A	#N/A
Q1/1963	1963-03-31	354.104	#N/A	75.7498	152.734	81.1834	33.476	14215	18.3202		#N/A	124.567	124.567	#N/A		#N/A	#N/A	#N/A	#N/A
Q2/1963	1963-06-30	354.327	#N/A	81.231	167.467	83.742	33.816	14615	19.112		#N/A	136.583	136.583	#N/A		#N/A	#N/A	#N/A	#N/A
Q3/1963	1963-09-30	371.935	#N/A	83.3037	171.783	84.6715	34.659	14963	19.9047		#N/A	140.103	140.103	#N/A		#N/A	#N/A	#N/A	#N/A
Q4/1963	1963-12-31	372.505	#N/A	85.8317	175.251	85.6881	34.681	15846	20.6639		#N/A	142.932	142.932	#N/A		#N/A	#N/A	#N/A	#N/A
Q1/1964	1964-03-31	374.671	#N/A	87.8412	178.409	80.2129	36.155	16153	21.3897		#N/A	145.507	145.507	#N/A		#N/A	#N/A	#N/A	#N/A
Q2/1964	1964-06-30	389.863	#N/A	88.6676	185.155	73.3311	37.87	16479	22.2721		#N/A	151.01	151.01	#N/A		#N/A	#N/A	#N/A	#N/A
Q3/1964	1964-09-30	403.309	#N/A	90.404	187.15	67.2266	38.223	16994	23.3113		#N/A	152.637	152.637	#N/A		#N/A	#N/A	#N/A	#N/A
Q4/1964	1964-12-31	412.796	#N/A	90.2237	191.083	63.2731	39.986	17296	24.4783		#N/A	155.844	155.844	#N/A		#N/A	#N/A	#N/A	#N/A
Q1/1965	1965-03-31	431.325	#N/A	90.1716	191.672	61.9571	40.751	16974	25.7732		#N/A	156.324	156.324	#N/A		#N/A	#N/A	#N/A	#N/A
Q2/1965	1965-06-30	445.696	#N/A	92.1774	194.052	62.8244	42.044	16354	27.179		#N/A	158.266	158.266	#N/A		#N/A	#N/A	#N/A	#N/A
Q3/1965	1965-09-30	467.819	#N/A	92.4556	195.915	64.866	45.323	16542	28.6955		#N/A	159.785	159.785	#N/A		#N/A	#N/A	#N/A	#N/A
Q4/1965	1965-12-31	486.765	#N/A	92.7871	196.66	64.3019	48.411	16570	30.5129		#N/A	160.392	160.392	#N/A		#N/A	#N/A	#N/A	#N/A
Q1/1966	1966-03-31	511.386	76.7386	94.532	200.531	64.5608	50.774	17548	32.6312		#N/A	163.55	163.55	#N/A		#N/A	54.3044	54.3044	#N/A
Q2/1966	1966-06-30	520.575	77.5819	96.0083	198.675	67.0188	52.371	19850	33.9273		#N/A	162.036	162.036	#N/A		#N/A	54.9012	54.9012	#N/A
Q3/1966	1966-09-30	538.388	79.2281	98.8965	193.625	74.6349	54.968	20272	34.4013		#N/A	157.917	157.917	#N/A		#N/A	56.0661	56.0661	#N/A
Q4/1966	1966-12-31	553.649	80.2123	100.535	187.971	73.6439	56.532	20335	34.0589		#N/A	153.306	153.306	#N/A		#N/A	56.7626	56.7626	#N/A
Q1/1967	1967-03-31	553.455	85.6493	103.444	178.301	77.888	55.72	20792	32.9		#N/A	145.419	145.419	#N/A		#N/A	60.6101	60.6101	#N/A
Q2/1967	1967-06-30	534.985	89.131	104.291	174.702	81.8709	54.789	22326	32.0136		#N/A	142.484	142.484	#N/A		#N/A	63.074	63.074	#N/A
Q3/1967	1967-09-30	531.47	88.6281	104.713	173.17	83.749	51.608	23634	31.3998		#N/A	141.234	141.234	#N/A		#N/A	62.7181	62.7181	#N/A
Q4/1967	1967-12-31	533.19	87.1675	107.039	181.135	85.2957	50.394	24737	30.7117		#N/A	147.73	147.73	#N/A		#N/A	61.6845	61.6845	#N/A
Q1/1968	1968-03-31	542.635	92.6952	108.867	178.064	85.7865	51.677	26052	29.9493		#N/A	145.226	145.226	#N/A		#N/A	65.5962	65.5962	#N/A
Q2/1968	1968-06-30	534.892	90.237	99.2679	180.012	87.5317	49.016	26944	30.1045		#N/A	146.815	146.815	#N/A		#N/A	63.8566	63.8566	#N/A
Q3/1968	1968-09-30	537.473	90.4831	111.55	186.837	92.2066	49.603	27642	31.1771		#N/A	152.381	152.381	#N/A		#N/A	64.0308	64.0308	#N/A
Q4/1968	1968-12-31	543.613	94.6603	114.852	197.05	95.6875	48.842	29724	33.2654		#N/A	160.711	160.711	#N/A		#N/A	66.9868	66.9868	#N/A
Q1/1969	1969-03-31	558.218	89.2383	114.361	200.268	87.1698	48.757	29826	36.3694		#N/A	163.335	163.335	#N/A		89.2383	63.1499	63.1499	0
Q2/1969	1969-06-30	550.887	91.5036	119.895	207.777	94.8638	48.31	31717	38.9083		#N/A	169.459	169.459	#N/A		91.5036	64.2077	64.2077	0.863422
Q3/1969	1969-09-30	563.636	94.7989	120.358	216.796	95.3111	49.553	34038	40.8819		#N/A	176.815	176.815	#N/A		94.7989	66.6425	66.6425	0.700531
Q4/1969	1969-12-31	552.253	95.017	118.011	216.012	89.0932	50.834	36429	42.61		#N/A	176.176	176.176	#N/A		95.017	67.1941	67.1941	0.0714555
Q1/1970	1970-03-31	554.387	91.9224	120.419	204.526	103.827	52.111	37455	45.8153		#N/A	166.808	166.808	#N/A		91.9224	65.4172	65.4172	-0.582557
Q2/1970	1970-06-30	553.563	97.7105	122.374	239.207	102.234	53.136	38052	45.1923		#N/A	195.093	195.093	#N/A		97.7105	68.8551	68.8551	0.459529
Q3/1970	1970-09-30	553.91	97.358	122.872	253.054	105.288	54.021	39867	44.4282		#N/A	206.386	206.386	#N/A		97.358	68.599	68.599	0.470062
Q4/1970	1970-12-31	524.96	98.8707	125.767	245.275	103.682	52.653	39939	43.7477		#N/A	200.042	200.042	#N/A		98.8707	69.879	69.879	0.138263
Q1/1971	1971-03-31	507.532	95.1965	125.594	236.123	106.764	53.207	40070	43.0093		#N/A	192.578	192.578	#N/A		95.1965	67.3929	67.3929	-0.0422042
Q2/1971	1971-06-30	500.348	95.4066	129.751	239.28	103.597	53.938	40686	43.483		#N/A	195.153	195.153	#N/A		95.4066	67.4768	67.4768	0.0603743
Q3/1971	1971-09-30	496.748	94.4762	133.792	234.576	104.49	54.411	40872	43.9745		#N/A	191.316	191.316	#N/A		94.4762	66.961	66.961	-0.165441
Q4/1971	1971-12-31	495.052	94.5676	135.623	223.347	105.893	55.067	40990	45.532		#N/A	182.158	182.158	#N/A		94.5676	67.0395	67.0395	-0.187326
Q1/1972	1972-03-31	497.067	91.7504	135.472	217.923	109.017	54.628	43264	47.8989		#N/A	177.734	177.734	#N/A		91.7504	65.032	65.032	-0.165322
Q2/1972	1972-06-30	503.791	92.9067	136.649	212.02	109.067	54.972	42901	50.9119		#N/A	172.92	172.92	#N/A		92.9067	66.0768	66.0768	-0.524054
Q3/1972	1972-09-30	502.031	91.4253	138.183	213.002	114.46	54.079	43156	52.8312		#N/A	173.721	173.721	#N/A		91.4253	65.017	65.017	-0.505874
Q4/1972	1972-12-31	531.362	93.559	140.695	210.709	116.906	53.599	44650	54.5099		#N/A	171.85	171.85	#N/A		93.559	66.3264	66.3264	-0.18834
Q1/1973	1973-03-31	560.158	102.543	142.136	216.648	117.727	56.25	47820	56.6736		#N/A	176.694	176.694	#N/A		102.543	73.0765	73.0765	-0.810037
Q2/1973	1973-06-30	583.239	100.087	143.719	207.572	119.618	57.576	47494	58.36		#N/A	169.292	169.292	#N/A		100.087	70.8498	70.8498	-0.0357157
Q3/1973	1973-09-30	591.623	101.883	147.028	210.669	127.042	60.47	48077	59.2673		#N/A	171.818	171.818	#N/A		101.883	72.2277	72.2277	-0.205751
Q4/1973	1973-12-31	605.973	102.931	147.79	209.728	130.712	62.755	47912	61.0407		#N/A	171.05	171.05	#N/A		102.931	72.8636	72.8636	-0.0385601
Q1/1974	1974-03-31	621.892	105.661	146.471	232.374	128.78	62.924	43950	63.0251		#N/A	189.52	189.52	#N/A		105.661	75.2676	75.2676	-0.78559
Q2/1974	1974-06-30	634.103	99.2226	148.371	216.652	125.878	62.986	45661	64.0881		#N/A	176.697	176.697	#N/A		99.2226	71.4334	71.4334	-1.92884
Q3/1974	1974-09-30	626.671	104.423	146.534	222.98	133.449	65.783	44214	64.3259		#N/A	181.859	181.859	#N/A		104.423	74.0134	74.0134	-0.186819
Q4/1974	1974-12-31	622.959	103.273	141.736	222.974	124.893	67.794	44486	63.9589		#N/A	181.854	181.854	#N/A		103.273	73.8169	73.8169	-1.16423
Q1/1975	1975-03-31	603.185	99.5052	139.655	234.759	120.795	70.022	43833	63.2762		#N/A	191.465	191.465	#N/A		99.5052	71.4626	71.4626	-1.6584
Q2/1975	1975-06-30	572.502	99.1816	140.715	216.65	119.53	71.617	44223	62.3766		#N/A	176.696	176.696	#N/A		99.1816	71.0631	71.0631	-1.38841
Q3/1975	1975-09-30	586.57	100.395	138.703	223.186	120.988	70.856	43894	62.4224		#N/A	182.026	182.026	#N/A		100.395	71.6346	71.6346	-0.93333
Q4/1975	1975-12-31	596.119	98.8996	143.872	225.167	121.55	70.271	43741	61.641		#N/A	183.642	183.642	#N/A		98.8996	70.6635	70.6635	-1.07163
Q1/1976	1976-03-31	599.789	100.243	149.308	222.967	123.938	69.745	44524	61.3036		#N/A	181.848	181.848	#N/A		100.243	71.801	71.801	-1.3675
Q2/1976	1976-06-30	587.716	100.95	147.358	226.675	122.09	69.571	44247	61.4363		#N/A	184.872	184.872	#N/A		100.95	72.5652	72.5652	-1.78548
Q3/1976	1976-09-30	598.293	100.187	145.198	219.207	126.1	65.475	44318	61.5832		#N/A	178.782	178.782	#N/A		100.187	71.7136	71.7136	-1.29162
Q4/1976	1976-12-31	588.619	98.7002	142.709	222.688	131.011	68.341	43235	61.7546		#N/A	181.62	181.62	#N/A		98.7002	71.0452	71.0452	-1.89952
Q1/1977	1977-03-31	610.911	93.9269	146.382	231.155	132.308	69.651	44763	61.9827		#N/A	188.526	188.526	#N/A		93.9269	67.8409	67.8409	-2.17433
Q2/1977	1977-06-30	615.624	97.5187	144.792	223.114	132.5	70.054	45280	61.3577		#N/A	181.968	181.968	#N/A		97.5187	70.8685	70.8685	-2.94369
Q3/1977	1977-09-30	623.106	94.0895	144.947	224.651	129.496	71.149	46466	61.2471		#N/A	183.222	183.222	#N/A		94.0895	68.3836	68.3836	-2.85151
Q4/1977	1977-12-31	639.953	96.5528	143.171	230.902	129.778	70.79	46761	61.8723		#N/A	188.319	188.319	#N/A		96.5528	70.3413	70.3413	-3.19123
Q1/1978	1978-03-31	642.714	96.763	143.342	236.673	128.054	69.817	47098	62.2511		#N/A	193.027	193.027	#N/A		96.763	70.7401	70.7401	-3.5872
Q2/1978	1978-06-30	711.284	97.2317	145.574	235.107	130.734	71.936	49831	61.74		#N/A	191.749	191.749	#N/A		97.2317	71.1283	71.1283	-3.6767
Q3/1978	1978-09-30	738.439	94.4749	144.596	244.461	134.348	72.53	50601	61.0708		#N/A	199.378	199.378	#N/A		94.4749	69.2412	69.2412	-3.77767
Q4/1978	1978-12-31	766.885	92.3538	146.839	245.688	138.781	74.275	52246	60.3654		#N/A	200.379	200.379	#N/A		92.3538	67.5701	67.5701	-3.50832
Q1/1979	1979-03-31	770.594	95.5272	144.533	233.638	137.446	75.887	54073	59.5851		#N/A	190.551	190.551	#N/A		95.5272	70.0887	70.0887	-3.94051
Q2/1979	1979-06-30	780.576	96.6526	146.931	254.25	139.805	78.115	53917	59.324		#N/A	207.362	207.362	#N/A		96.6526	70.9796	70.9796	-4.09017
Q3/1979	1979-09-30	817.722	98.8875	151.915	257.042	145.258	83.724	54211	59.7428		#N/A	209.639	209.639	#N/A		98.8875	72.5697	72.5697	-4.10373
Q4/1979	1979-12-31	823.66	95.9285	154.915	259.234	151.788	84.581	55328	60.5732		#N/A	211.426	211.426	#N/A		95.9285	70.5567	70.5567	-4.23191
Q1/1980	1980-03-31	848.988	93.0344	155.679	263.196	146.415	87.591	55699	62.4126		#N/A	214.658	214.658	#N/A		93.0344	68.4164	68.4164	-4.08579
Q2/1980	1980-06-30	821.675	91.8375	156.465	251.55	146.044	89.304	55363	61.778		#N/A	205.16	205.16	#N/A		91.8375	67.8264	67.8264	-4.49274
Q3/1980	1980-09-30	816.549	90.1221	157.418	249.975	145.923	92.198	55455	59.625		#N/A	203.875	203.875	#N/A		90.1221	66.3306	66.3306	-4.04636
Q4/1980	1980-12-31	824.729	87.1005	156.395	242.99	147.928	93.708	57857	61.2451		#N/A	198.178	198.178	#N/A		87.1005	64.3621	64.3621	-4.31517
Q1/1981	1981-03-31	844.703	81.6056	156.298	243.872	144.85	98.339	59046	59.032		#N/A	198.898	198.898	#N/A		81.6056	60.4732	60.4732	-4.31452
Q2/1981	1981-06-30	854.639	81.0766	156.597	245.712	144.507	99.971	58095	59.8516		#N/A	200.399	200.399	#N/A		81.0766	60.0536	60.0536	-4.24287
Q3/1981	1981-09-30	876.236	78.7747	156.587	238.679	144.771	100.705	58941	60.0939		#N/A	194.662	194.662	#N/A		78.7747	58.794	58.794	-4.82774
Q4/1981	1981-12-31	908.169	78.7748	159.377	224.87	141.962	103.812	59433	58.8038		#N/A	183.4	183.4	#N/A		78.7748	58.9422	58.9422	-5.06231
Q1/1982	1982-03-31	886.54	79.6044	160.182	225.053	143.669	99.824	58821	60.4851		#N/A	183.549	183.549	#N/A		79.6044	58.8879	58.8879	-4.04668
Q2/1982	1982-06-30	868.574	78.8667	163.192	228.771	139.492	95.235	59773	60.2866		#N/A	186.582	186.582	#N/A		78.8667	59.9099	59.9099	-6.49171
Q3/1982	1982-09-30	840.655	84.0966	160.093	222.273	138.622	89.621	59474	60.9999		#N/A	181.282	181.282	#N/A		84.0966	62.5976	62.5976	-4.88718
Q4/1982	1982-12-31	829.033	84.6823	159.899	220.245	138.044	88.584	58498	61.8245		#N/A	179.628	179.628	#N/A		84.6823	62.9967	62.9967	-4.86283
Q1/1983	1983-03-31	803.295	87.7561	158.337	215.538	135.079	84.951	57769	62.6017		#N/A	175.789	175.789	#N/A		87.7561	64.1921	64.1921	-3.3113
Q2/1983	1983-06-30	804.583	83.9447	156.278	220.992	133.516	81.995	59220	61.5263		#N/A	180.237	180.237	#N/A		83.9447	62.6841	62.6841	-5.19437
Q3/1983	1983-09-30	835.87	86.7635	155.716	218.133	132.77	83.428	59562	61.3481		#N/A	177.906	177.906	#N/A		86.7635	63.8355	63.8355	-3.85892
Q4/1983	1983-12-31	882.273	92.5912	155.822	224.011	133.774	87.23	59429	59.1042		#N/A	182.699	182.699	#N/A		92.5912	68.4559	68.4559	-4.64499
Q1/1984	1984-03-31	912.438	93.6221	157.9	210.795	136.578	87.472	60771	59.4643		#N/A	171.921	171.921	#N/A		93.6221	68.7031	68.7031	-3.88122
Q2/1984	1984-06-30	956.178	96.6909	156.009	199.565	140.219	87.367	63974	56.8267		#N/A	162.762	162.762	#N/A		96.6909	71.8895	71.8895	-5.4881
Q3/1984	1984-09-30	987.71	99.5396	158.366	221.262	145.16	87.451	62938	57.2652		#N/A	180.457	180.457	#N/A		99.5396	73.7564	73.7564	-5.25216
Q4/1984	1984-12-31	1022.94	102.274	161.237	231.627	144.353	87.311	64467	57.7419		#N/A	188.911	188.911	#N/A		102.274	75.7436	75.7436	-5.33458
Q1/1985	1985-03-31	1034.85	109.199	161.514	217.543	144.005	90.956	66602	59.375		#N/A	177.425	177.425	#N/A		109.199	81.7356	81.7356	-7.06311
Q2/1985	1985-06-30	1062.89	100.661	167.089	232.446	146.272	96.62	67696	58.8219		#N/A	189.579	189.579	#N/A		100.661	74.8234	74.8234	-5.68482
Q3/1985	1985-09-30	1059.02	103.495	170.051	237.415	147.167	96.978	70398	61.8972		#N/A	193.632	193.632	#N/A		103.495	76.9438	76.9438	-5.86723
Q4/1985	1985-12-31	1069.04	104.148	170.642	248.802	148.567	94.537	71014	65.6464		#N/A	202.919	202.919	#N/A		104.148	77.2319	77.2319	-5.59203
Q1/1986	1986-03-31	1056.51	105.082	171.672	235.767	153.362	97.035	70646	67.7297		#N/A	192.288	192.288	#N/A		105.082	77.9498	77.9498	-5.68199
Q2/1986	1986-06-30	1036.29	101.569	175.889	251.59	154.714	94.399	72588	69.6402		#N/A	205.192	205.192	#N/A		101.569	74.369	74.369	-3.94821
Q3/1986	1986-09-30	1039.37	106.018	178.589	250.559	156.21	91.839	73025	70.4261		#N/A	204.351	204.351	#N/A		106.018	78.6403	78.6403	-5.7261
Q4/1986	1986-12-31	1039.92	107.617	180.108	261.228	157.714	91.058	73942	73.0044		#N/A	213.053	213.053	#N/A		107.617	80.8144	80.8144	-7.3768
Q1/1987	1987-03-31	1020.19	105.476	178.844	234.074	161.891	91.304	72852	76.1255		#N/A	190.907	190.907	#N/A		105.476	77.6268	77.6268	-4.72911
Q2/1987	1987-06-30	1047.81	107.842	184.865	261.842	168.902	95.985	74056	79.6272		#N/A	213.553	213.553	#N/A		107.842	81.9665	81.9665	-8.94928
Q3/1987	1987-09-30	1081.9	117.588	189.967	264.814	167.031	101.655	76654	81.3485		#N/A	215.978	215.978	#N/A		117.588	88.4954	88.4954	-8.36748
Q4/1987	1987-12-31	1076.86	124.961	195.271	264.585	170.647	105.371	79263	85.0859		#N/A	215.791	215.791	#N/A		124.961	92.654	92.654	-6.69028
Q1/1988	1988-03-31	1075.16	124.135	199.905	259.46	180.334	109.793	82051	86.1901		#N/A	211.611	211.611	#N/A		124.135	92.5671	92.5671	-7.47828
Q2/1988	1988-06-30	1102.71	125.62	205.625	263.957	183.006	110.647	84334	90.1717		#N/A	215.279	215.279	#N/A		125.62	95.8376	95.8376	-10.9926
Q3/1988	1988-09-30	1106.09	124.947	207.537	270.089	185.257	117.693	88557	92.5373		#N/A	220.28	220.28	#N/A		124.947	97.0113	97.0113	-13.6052
Q4/1988	1988-12-31	1119.34	128.075	211.368	269.507	184.501	113.762	89890	98.669		#N/A	219.805	219.805	#N/A		128.075	98.6994	98.6994	-12.7734
Q1/1989	1989-03-31	1135.22	138.126	216.994	287.848	190.274	118.272	96749	101.385		#N/A	234.764	234.764	#N/A		138.126	103.563	103.563	-9.2128
Q2/1989	1989-06-30	1155.55	141.594	218.203	274.574	190.707	119.829	92928	106.568		#N/A	223.937	223.937	#N/A		141.594	106.807	106.807	-10.4627
Q3/1989	1989-09-30	1192.65	149.408	221.737	283.585	192.032	118.501	96393	108.847		#N/A	231.287	231.287	#N/A		149.408	111.928	111.928	-9.81493
Q4/1989	1989-12-31	1180.47	150.267	227.355	288.383	198.975	122.575	100461	107.883		#N/A	235.2	235.2	#N/A		150.267	111.357	111.357	-7.94893
Q1/1990	1990-03-31	1205.91	153.41	233.248	309.664	201.83	121.637	101641	107.776		#N/A	252.557	252.557	#N/A		153.41	111.287	111.287	-4.31662
Q2/1990	1990-06-30	1192.36	152.139	235.826	295.298	203.446	121.602	103977	111.272		#N/A	240.84	240.84	#N/A		152.139	111.786	111.786	-6.53051
Q3/1990	1990-09-30	1203.31	150.3	238.944	299.408	200.358	121.208	106647	114.82		#N/A	244.192	244.192	#N/A		150.3	110.6	110.6	-6.71279
Q4/1990	1990-12-31	1196.06	149.204	239.377	305.902	198.82	119.822	109036	116.836		#N/A	249.489	249.489	#N/A		149.204	109.396	109.396	-6.0338
Q1/1991	1991-03-31	1168.58	141.898	238.526	310.716	200.979	125.815	110784	114.243		310.716	253.415	253.415	0		141.898	105.532	105.532	-8.103
Q2/1991	1991-06-30	1164.17	142.569	241.662	314.703	201.846	122.696	108358	117.1		314.703	255.248	255.248	0.559909		142.569	103.536	103.536	-4.18993
Q3/1991	1991-09-30	1152.75	140.615	241.784	320.399	203.925	121.521	109699	116.085		320.399	256.79	256.79	1.78423		140.615	101.239	101.239	-2.74155
Q4/1991	1991-12-31	1146.19	141.461	242.538	325.205	202.321	122.263	111245	118.965		325.205	262.18	262.18	1.20403		141.461	102.12	102.12	-3.19071
Q1/1992	1992-03-31	1147.7	141.129	243.964	327.339	201.768	119.175	108178	120.48		327.339	267.688	267.688	-0.282565		141.129	104.114	104.114	-6.71966
Q2/1992	1992-06-30	1174.57	141.562	241.887	325.438	201.783	112.276	111093	113.269		325.438	264.854	264.854	0.224135		141.562	101.877	101.877	-2.69285
Q3/1992	1992-09-30	1187.34	139.868	238.516	318.799	193.039	113.884	109527	109.994		318.799	256.469	256.469	1.39627		139.868	101.346	101.346	-3.74967
Q4/1992	1992-12-31	1208.05	138.727	235.388	309.153	189.181	106.948	106176	101.421		309.153	250.55	250.55	0.627301		138.727	98.9207	98.9207	-1.18714
Q1/1993	1993-03-31	1206.77	142.388	231.052	300.411	175.946	107.992	110608	98.5581		300.411	243.85	243.85	0.457828		142.388	102.728	102.728	-3.11478
Q2/1993	1993-06-30	1236.18	136.22	226.696	295.169	167.251	112.122	106255	99.3734		295.169	239.255	239.255	0.583959		136.22	98.8714	98.8714	-3.9193
Q3/1993	1993-09-30	1238.39	135.369	223.721	295.218	162.4	115.763	102452	100.381		295.218	237.257	237.257	1.3882		135.369	98.9439	98.9439	-4.98773
Q4/1993	1993-12-31	1278.93	134.547	222.348	285.032	160.887	117.963	98909	96.7501		285.032	230.361	230.361	0.831373		134.547	98.8016	98.8016	-5.68263
Q1/1994	1994-03-31	1272.94	143.051	225.297	290.06	163.376	117.588	101429	95.7957		290.06	235.575	235.575	0.392169		143.051	104.266	104.266	-4.80676
Q2/1994	1994-06-30	1297.67	140.064	227.506	290.427	170.124	122.098	101858	99.1357		290.427	236.78	236.78	0.0343877		140.064	104.09	104.09	-7.87424
Q3/1994	1994-09-30	1331.92	143.338	228.997	293.474	171.479	123.776	99944	102.731		293.474	238.547	238.547	0.317753		143.338	105.193	105.193	-5.95331
Q4/1994	1994-12-31	1374.63	145.861	229.057	297.329	176.256	128.2	100822	105.342		297.329	242.608	242.608	-0.0437612		145.861	108.004	108.004	-7.57761
Q1/1995	1995-03-31	1422.42	144.431	230.739	291.026	178.96	127.823	101144	109.64		291.026	236.061	236.061	0.511172		144.431	106.476	106.476	-6.75907
Q2/1995	1995-06-30	1440.47	146.899	229.867	293.548	183.93	130.724	105447	108.96		293.548	239.494	239.494	-0.0320162		146.899	110.019	110.019	-9.60462
Q3/1995	1995-09-30	1440.78	150.844	230.285	294.552	190.105	130.891	109658	107.572		294.552	238.983	238.983	0.49283		150.844	112.475	112.475	-9.07254
Q4/1995	1995-12-31	1460.55	152.803	231.326	292.405	198.826	131.592	110768	107.608		292.405	236.973	236.973	0.594797		152.803	114.257	114.257	-9.69856
Q1/1996	1996-03-31	1491.88	152.012	233.287	278.107	193.891	133.975	112153	108.204		278.107	224.499	224.499	0.915475		152.012	116.651	116.651	-14.3757
Q2/1996	1996-06-30	1527.54	157.098	232.225	295.529	193.491	130.795	113651	108.552		295.529	241.075	241.075	-0.0181557		157.098	119.338	119.338	-12.9317
Q3/1996	1996-09-30	1571.72	154.494	232.697	295.834	194.059	134.985	112738	109.9		295.834	239.712	239.712	0.617558		154.494	118.858	118.858	-15.0913
Q4/1996	1996-12-31	1609.49	142.411	231.267	296.215	191.653	142.413	111577	109.384		296.215	240.681	240.681	0.357704		142.411	112.68	112.68	-18.8474
Q1/1997	1997-03-31	1643.23	153.292	227.694	290.086	194.574	146.239	111908	112.9		290.086	234.27	234.27	0.91502		153.292	110.136	110.136	-2.62582
Q2/1997	1997-06-30	1668.77	159.672	231.273	293.415	197.738	151.299	112631	114.924		293.415	238.699	238.699	0.23859		159.672	128.552	128.552	-24.6388
Q3/1997	1997-09-30	1732.6	166.716	231.649	294.972	199.415	157.557	113693	116.72		294.972	240.268	240.268	0.120483		166.716	128.964	128.964	-17.3977
Q4/1997	1997-12-31	1734.53	168.076	235.871	299.265	206.437	159.573	113757	120.124		299.265	244.631	244.631	-0.219554		168.076	130.948	130.948	-19.0154
Q1/1998	1998-03-31	1775.81	172.788	240.644	309.024	206.144	161.024	110555	124.392		309.024	250.898	250.898	0.448466		172.788	136.876	136.876	-23.1224
Q2/1998	1998-06-30	1839.45	175.068	246.036	306.759	208.859	162.622	109607	126.408		306.759	250.509	250.509	-0.12716		175.068	140.612	140.612	-26.4835
Q3/1998	1998-09-30	1877.35	174.84	250.389	311.688	211.44	163.864	110727	129.58		311.688	254.726	254.726	-0.204691		174.84	143.772	143.772	-31.743
Q4/1998	1998-12-31	1917.48	182.928	253.599	312.382	214.294	167.142	112401	134.868		312.382	254.453	254.453	0.126181		182.928	150.376	150.376	-33.1373
Q1/1999	1999-03-31	1954.75	179.584	259.436	324.361	215.27	168.578	110551	137.712		324.361	263.194	263.194	0.532594		179.584	148.544	148.544	-33.9835
Q2/1999	1999-06-30	2002.78	179.264	264.171	325.509	217.579	172.079	110071	141.868		325.509	264.99	264.99	0.193254		179.264	148.56	148.56	-34.3674
Q3/1999	1999-09-30	2054.67	181.856	269.124	332.08	221.958	173.198	108256	142.04		332.08	271.504	271.504	-0.262291		181.856	147.088	147.088	-29.1319
Q4/1999	1999-12-31	2071.37	174.44	274.354	332.89	226.342	178.167	109195	143.076		332.89	270.942	270.942	0.219911		174.44	141.156	141.156	-28.0487
Q1/2000	2000-03-31	2133.68	181.128	280.572	343.133	233.146	181.412	109883	138.892		343.133	281.458	281.458	-0.633315		181.128	146.324	146.324	-28.7379
Q2/2000	2000-06-30	2183.02	194.816	284.686	344.65	236.252	182.646	108465	140.984		344.65	282.838	282.838	-0.689424		194.816	149.4	149.4	-18.2701
Q3/2000	2000-09-30	2206.7	175.652	292.3	351.507	239.607	182.618	110563	142.984		351.507	288.413	288.413	-0.68266		175.652	151.356	151.356	-42.8426
Q4/2000	2000-12-31	2213.94	181.744	295.307	352.135	238.882	182.401	111782	145.08		352.135	287.882	287.882	-0.271305		181.744	140.964	140.964	-19.5598
Q1/2001	2001-03-31	2204.84	176.44	297.104	356.188	242.555	187.305	113631	145.608		356.188	290.02	290.02	0.189741		176.44	147.296	147.296	-35.5304
Q2/2001	2001-06-30	2186.55	184.808	296.275	348.154	246.035	189.05	109525	147.68		348.154	282.927	282.927	0.403206		184.808	142.116	142.116	-17.9506
Q3/2001	2001-09-30	2145.5	176.872	296.441	341.256	245.064	190.286	108208	148.016		341.256	276.286	276.286	0.803511		176.872	156.808	156.808	-50.1089
Q4/2001	2001-12-31	2116.57	169.528	294.935	336.839	245.466	179.357	104164	148.792		336.839	272.203	272.203	0.993389		169.528	134.856	134.856	-23.5768
Q1/2002	2002-03-31	2092.4	170.784	290.699	331.049	252.44	175.228	104021	150.02		331.049	266.514	266.514	1.3745		170.784	158.108	158.108	-58.9896
Q2/2002	2002-06-30	2074.53	178.704	287.094	325.72	251.509	177.188	102007	151.752		325.72	262.312	262.312	1.31803		178.704	127.384	127.384	-1.46204
Q3/2002	2002-09-30	2073.69	176.976	289.19	324.424	256.91	179.781	102931	153.792		324.424	262.255	262.255	0.9231		176.976	147.368	147.368	-35.0438
Q4/2002	2002-12-31	2058.85	184.712	291.214	322.751	263.64	178.483	102613	155.116		322.751	261.206	261.206	0.798602		184.712	143.292	143.292	-19.9204
Q1/2003	2003-03-31	2062.53	188.368	291.828	324.709	252.958	181.727	101651	159.4		324.709	261.399	261.399	1.35258		188.368	155.716	155.716	-35.4973
Q2/2003	2003-06-30	2105.06	175.696	291.101	322.161	251.669	185.887	102962	161.388		322.161	260.157	260.157	1.0229		175.696	142.672	142.672	-29.0419
Q3/2003	2003-09-30	2147.78	172.732	297	321.524	251.101	190.72	100833	162.668		321.524	260.465	260.465	0.696261		172.732	140.496	140.496	-28.9175
Q4/2003	2003-12-31	2169.33	170.96	297.275	321.133	253.275	195.83	103395	165.312		321.133	260.937	260.937	0.384091		170.96	135.68	135.68	-23.2769
Q1/2004	2004-03-31	2152.03	177.784	300.49	322.663	257.08	200.044	101843	167.068		322.663	258.445	258.445	1.85989		177.784	146.792	146.792	-33.2262
Q2/2004	2004-06-30	2195.26	179.208	301.371	321.356	256.812	202.65	101552	168.612		321.356	258.924	258.924	1.25041		179.208	152.68	152.68	-40.9543
Q3/2004	2004-09-30	2238.16	174.68	302.153	326.933	253.984	206.162	101740	172.792		326.933	263.732	263.732	1.14799		174.68	141.2	141.2	-27.8494
Q4/2004	2004-12-31	2266.98	177.504	306.287	324.954	255.811	209.385	102896	174.476		324.954	262.428	262.428	1.02544		177.504	145.312	145.312	-31.1964
Q1/2005	2005-03-31	2286.15	183.62	307.431	324.937	256.661	217.99	104679	178.98		324.937	261.941	261.941	1.21243		183.62	160.684	160.684	-48.6849
Q2/2005	2005-06-30	2316.89	192.696	308.74	329.957	256.746	222.712	105629	183.76		329.957	266.566	266.566	1.0025		192.696	143.564	143.564	-11.4043
Q3/2005	2005-09-30	2351.99	190.988	311.669	335.27	258.033	231.33	107530	186.448		335.27	269.788	269.788	1.44108		190.988	150.504	150.504	-24.308
Q4/2005	2005-12-31	2361.98	187.204	312.491	345.927	257.993	238.205	105696	188.924		345.927	280.565	280.565	0.618609		187.204	139.452	139.452	-11.0471
Q1/2006	2006-03-31	2430.44	188.488	313.298	345.552	261.187	240.669	105930	192.676		345.552	280.202	280.202	0.641195		188.488	152.404	152.404	-30.1182
Q2/2006	2006-06-30	2462.73	190.692	320.158	364.333	261.674	245.195	106513	198.14		364.333	298.126	298.126	-0.387625		190.692	144.204	144.204	-14.6634
Q3/2006	2006-09-30	2477.99	199.044	321.99	364.586	263.409	248.224	105191	200.548		364.586	297.817	297.817	-0.184147		199.044	138.176	138.176	4.24136
Q4/2006	2006-12-31	2489.02	202.544	328.669	377.259	270.891	250.306	107223	203.996		377.259	308.839	308.839	-0.45504		202.544	145.02	145.02	-2.67426
Q1/2007	2007-03-31	2518.82	203.52	335.138	380.888	270.452	251.195	107293	207.44		380.888	315.153	315.153	-1.77845		203.52	154.944	154.944	-17.2955
Q2/2007	2007-06-30	2564.85	211.4	339.799	383.539	267.332	253.216	105848	211.904		383.539	315.352	315.352	-1.00427		211.4	161.56	161.56	-18.9419
Q3/2007	2007-09-30	2594.13	202.132	345.334	384.688	268.73	254.927	104496	210.8		384.688	316.084	316.084	-0.923077		202.132	168.5	168.5	-40.3173
Q4/2007	2007-12-31	2627.26	222.764	348.838	397.715	266.335	258.766	105246	213.984		397.715	329.438	329.438	-2.00019		222.764	167.468	167.468	-15.563
Q1/2008	2008-03-31	2626.49	211.248	355.574	399.908	265.844	268.313	105375	212.272		399.908	331.544	331.544	-2.12556		211.248	190.628	190.628	-65.1424
Q2/2008	2008-06-30	2631.29	219.592	353.219	396.61	265.15	268.209	103163	214.78		396.61	326.488	326.488	-1.19158		219.592	182.284	182.284	-42.5792
Q3/2008	2008-09-30	2583.8	212.076	352.033	399.499	256.54	266.965	101712	207.82		399.499	327.644	327.644	-0.718028		212.076	168.148	168.148	-28.6167
Q4/2008	2008-12-31	2465.87	208.976	342.414	391.092	246.233	257.253	98642	200.812		391.092	321.046	321.046	-0.819797		208.976	154.228	154.228	-10.0478
Q1/2009	2009-03-31	2326.49	200.408	329.178	347.872	235.892	227.212	94887	185.352		347.872	282.491	282.491	0.484427		200.408	161.932	161.932	-31.8486
Q2/2009	2009-06-30	2285.24	185.628	321.193	347.62	230.92	222.447	94483	173.724		347.62	276.539	276.539	2.75186		185.628	161.188	161.188	-47.2328
Q3/2009	2009-09-30	2267.68	189.348	319.686	349.803	226.67	228.863	92246	175.564		349.803	277.417	277.417	3.10809		189.348	148.248	148.248	-22.5733
Q4/2009	2009-12-31	2242.48	188.316	321.181	346.991	234.51	238.158	91993	174.412		346.991	276.792	276.792	2.4497		188.316	155.456	155.456	-35.1438
Q1/2010	2010-03-31	2249.91	197.328	324.329	348.524	228.565	247.736	92398	175.416		348.524	278.75	278.75	2.17028		197.328	166.02	166.02	-41.7735
Q2/2010	2010-06-30	2310.57	193.864	327.797	367.939	229.381	256.787	91946	174.996		367.939	295.076	295.076	1.97623		193.864	150.724	150.724	-21.4335
Q3/2010	2010-09-30	2346.8	200.812	330.993	376.766	229.141	263.117	92680	173.22		376.766	301.88	301.88	2.13242		200.812	162.12	162.12	-31.6936
Q4/2010	2010-12-31	2373.43	203.908	333.165	374.09	233.692	270.304	91818	173.608		374.09	300.137	300.137	1.95885		203.908	154.836	154.836	-16.6897
Q1/2011	2011-03-31	2346.38	200.124	333.658	387.527	232.107	272.596	92429	169.892		387.527	312.041	312.041	1.58608		200.124	148.588	148.588	-11.0361
Q2/2011	2011-06-30	2380.18	197.224	335.302	388.615	231.478	275.985	92026	167.86		388.615	310.586	310.586	2.51046		197.224	157.56	157.56	-28.4933
Q3/2011	2011-09-30	2453.19	204.176	336.784	394.189	229.639	274.744	93161	166.652		394.189	313.562	313.562	3.13004		204.176	154.76	154.76	-16.2691
Q4/2011	2011-12-31	2492.17	207.804	343.895	390.62	229.169	277.457	95582	163.392		390.62	314.033	314.033	1.79547		207.804	151.68	151.68	-7.32626
Q1/2012	2012-03-31	2528.76	209.008	341.336	387.651	214.251	283.467	97192	158.876		387.651	310.16	310.16	2.36847		209.008	163.604	163.604	-24.8591
Q2/2012	2012-06-30	2559.86	207.34	340.748	382.683	209.382	287.894	97401	154.868		382.683	302.965	302.965	3.6088		207.34	162.74	162.74	-25.3601
Q3/2012	2012-09-30	2537.55	204.804	341.998	383.91	205.835	287.945	96320	151.504		383.91	302.34	302.34	4.24987		204.804	158.672	158.672	-21.7601
Q4/2012	2012-12-31	2541.3	216.252	340.639	380.786	200.918	291.022	96103	149.456		380.786	301.368	301.368	3.62834		216.252	147.648	147.648	8.52533
Q1/2013	2013-03-31	2558.19	202.612	337.173	367.911	194.65	292.989	96758	150.42		367.911	295.545	295.545	1.78264		202.612	148.46	148.46	-8.04541
Q2/2013	2013-06-30	2566.82	209.616	337.762	379.355	193.458	291.083	99984	149.988		379.355	299.833	299.833	3.77321		209.616	152.844	152.844	-7.13898
Q3/2013	2013-09-30	2579.38	218.94	338.084	378.266	192.074	292.614	102933	154.148		378.266	301.713	301.713	2.68104		218.94	156.06	156.06	-1.7832
Q4/2013	2013-12-31	2618.98	218.768	341.018	389.129	188.43	294.374	104608	154.684		389.129	306.406	306.406	4.32508		218.768	159.48	159.48	-7.39162
Q1/2014	2014-03-31	2642.63	222.92	339.945	394.149	190.996	296.03	106432	153.736		394.149	311.149	311.149	4.0695		222.92	162.651	162.651	-7.76077
Q2/2014	2014-06-30	2700.23	225.136	340.637	393.05	190.051	296.786	103648	155.224		393.05	314.46	314.46	2.409		225.136	166.071	166.071	-10.6934
Q3/2014	2014-09-30	2754.17	226.472	343.385	389.772	190.392	299.855	105107	156.432		389.772	318.144	318.144	-0.0995955		226.472	169.595	169.595	-14.7755
Q4/2014	2014-12-31	2746.77	225.416	342.363	397.153	193.971	305.253	106089	158.684		397.153	321.963	321.963	0.768773		225.416	173.145	173.145	-21.5803
Q1/2015	2015-03-31	2753.1	234.044	345.18	395.498	195.349	285.758	108285	165.608		395.498	325.946	325.946	-1.33588		234.044	175.954	175.954	-16.361
Q2/2015	2015-06-30	2784.95	235.376	343.504	395.969	197.36	275.917	106976	170.524		395.969	330.098	330.098	-2.82226		235.376	178.88	178.88	-19.501
Q3/2015	2015-09-30	2794.19	226.056	348.074	400.065	198.49	267.262	107451	172.472		400.065	334.421	334.421	-3.2104		226.056	181.899	181.899	-34.7263
Q4/2015	2015-12-31	2760.14	224.46	352.985	411.279	198.644	265.446	107420	173.608		411.279	338.802	338.802	-1.33015		224.46	185.04	185.04	-41.4877
Q1/2016	2016-03-31	2751.26	224.172	357.185	415.617	200.926	259.774	107319	172.876		415.617					224.172			251.206
Q2/2016	2016-06-30	2756.81	230.48	356.812	408.516	199.717	257.372	108236	176.824		408.516					230.48			258.275
Q3/2016	2016-09-30	2766.85	232.888	356.985	410.746	205.056	260.263	107935	176.148		410.746					232.888			260.973
Q4/2016	2016-12-31	2773.65	231.508	357.978	408.896	211.57	253.404	108644	176.72		408.896					231.508			259.427
Q1/2017	2017-03-31	2818.4	228.728	364.117	421.764	205.197	258.48	109085	180.652		421.764					228.728			256.311
Q2/2017	2017-06-30	2848.57	237.52	366.938	427.754	209.322	262.162	111000	181.072		427.754					237.52			266.164
Q3/2017	2017-09-30	2867.92	237.5	370.152	430.003	217.646	266.633	111101	183.944		430.003					237.5			266.141
Q4/2017	2017-12-31	2922.17	240.44	375.056	431.326	221.946	271.731	111526	184.204		431.326					240.44			269.436
Q1/2018	2018-03-31	2957.33	241.816	377.456	437.093	224.146	274.747	111466	186.148		437.093					241.816			270.978
Q2/2018	2018-06-30	3001.74	242.164	381.673	441.772	226.38	277.692	112932	188.12		441.772					242.164			271.367
Q3/2018	2018-09-30	3036.55	242.905	385.943	446.535	228.634	280.732	113461	190.249		446.535					242.905			272.198
Q4/2018	2018-12-31	3071.76	243.691	390.224	451.412	230.907	283.809	113409	192.471		451.412					243.691			273.078
Q1/2019	2019-03-31	3107.39	244.399	394.477	456.024	232.977	286.869	113424	194.475		456.024					244.399			273.872
Q2/2019	2019-06-30	3143.44	245.017	398.676	460.724	235.064	289.699	113371	196.42		460.724					245.017			274.565
Q3/2019	2019-09-30	3179.91	245.582	402.819	465.376	237.167	292.398	113279	198.384		465.376					245.582			275.198
Q4/2019	2019-12-31	3216.8	246.151	406.941	470.076	239.286	295.068	113112	200.368		470.076					246.151			275.836

## Sheet: G
Q1/1960 !Q mag=bil	.excel_last	Q111gc@OUTLOOK	Q112gc@OUTLOOK	Q132gc@OUTLOOK		Q136gc@OUTLOOK	Q156gc@OUTLOOK	Q158gc@OUTLOOK	Q184gc@OUTLOOK			GERMANY	Q1/1960 !Q mag=bil	S134NCGC@G10	Q134GC@OUTLOOK					Q1/1960 !Q	Q134GCP@OUTLOOK					Q134GCP@OUTLOOK
.DESC		US: Government Final Consumption Expenditure, Volume(SAAR,Bil.Chn.2009.US$)	UK: Government Final Consumption Expenditure, Volume(SAAR,Bil.Chn.2015.Pound)	France: Government Final Consumption Expenditure, Volume(SAAR,Bil.Chn.2010.Euro)	Germany: Government Final Consumption Expenditure, Volume(Bil.Ch.2010.EUR)	Italy: Government Final Consumption Expenditure, Volume(SAAR,Bil.Euro)	Canada: Government Final Consumption Expenditure, Volume(SAAR,Bil.Chn.2007.C$)	Japan: Government Final Consumption Expenditure, Volume(SAAR,Bil.Chn.2011.Yen)	Spain: Government Final Consumption Expenditure, Volume(SAAR,Bil.Chn.2010.Euro)				.DESC	Germany: GDP: Government Consumption (SWDA, Bil.Chn.2010.Euros)	Germany: Government Final Consumption Expenditure, Vol(SAAR,Bil.Chn.2010.Euro)	Germany: Government Final Consumption Expenditure, Volume(Bil.Ch.2010.EUR)	Comparison			.DESC	Germany: Gov Final Consumption Expenditure Growth, Volume (Annualized % Change)	Comparison				Germany: Govt Final Consumption Expenditure Growth, Volume(Annualized % Change)
.T1		Q1-1960	Q1-1960	Q1-1960	Q1-1960	Q1-1960	Q1-1961	Q1-1960	Q1-1960				.T1	Q1-1970	Q1-1991					.T1	Q2-1991					Q2-1960
.TN		Q4-2019	Q4-2019	Q4-2019	Q4-2019	Q4-2019	Q4-2019	Q4-2019	Q4-2019				.TN	Q1-2018	Q4-2019					.TN	Q4-2019					Q4-2015
.LSOURCE		Organization for Economic Cooperation & Development	Organization for Economic Cooperation & Development	Organization for Economic Cooperation & Development	Organization for Economic Cooperation & Devt	Organization for Economic Cooperation & Development	Organization for Economic Cooperation & Development	Organization for Economic Cooperation & Development	Organization for Economic Cooperation & Development				.LSOURCE	Deutsche Bundesbank	Organization for Economic Cooperation & Development					.LSOURCE	Organization for Economic Cooperation & Development				Historical Germany Series	Organization for Economic Cooperation & Devt
.DTLM		May-30-2018 07:53	May-30-2018 07:53	May-30-2018 09:03		May-30-2018 07:53	May-30-2018 07:53	May-30-2018 07:53	May-30-2018 07:53				.DTLM	May-24-2018 01:20	May-30-2018 07:53					.DTLM	May-30-2018 07:53					May-09-2014 15:38
Q1/1960	1960-03-31	810.474	130.624	94.062	136.273	102.568	#N/A	16890	24.168				Q1/1960	#N/A	#N/A	#N/A	#N/A	#N/A		Q1/1960	#N/A	#N/A	#N/A		136.273	#N/A
Q2/1960	1960-06-30	820.865	131.236	94.651	136.806	103.794	#N/A	16743	24.277				Q2/1960	#N/A	#N/A	#N/A	#N/A	#N/A	#N/A	Q2/1960	#N/A	#N/A	#N/A		136.806	1.5735	#N/A
Q3/1960	1960-09-30	834.199	131.848	95.594	137.872	104.954	#N/A	16963	24.495				Q3/1960	#N/A	#N/A	#N/A	#N/A	#N/A	#N/A	Q3/1960	#N/A	#N/A	#N/A		137.872	3.153	#N/A
Q4/1960	1960-12-31	842.948	133.188	96.886	139.505	106.063	#N/A	17188	24.803				Q4/1960	#N/A	#N/A	#N/A	#N/A	#N/A	#N/A	Q4/1960	#N/A	#N/A	#N/A		139.505	4.8226	#N/A
Q1/1961	1961-03-31	833.177	134.644	98.54	141.705	107.34	80.057	17378	25.202				Q1/1961	#N/A	#N/A	#N/A	#N/A	#N/A	#N/A	Q1/1961	#N/A	#N/A	#N/A		141.705	6.4593	#N/A
Q2/1961	1961-06-30	850.316	136.056	100.266	144.267	108.385	80.438	17738	25.59				Q2/1961	#N/A	#N/A	#N/A	#N/A	#N/A	#N/A	Q2/1961	#N/A	#N/A	#N/A		144.267	7.4305	#N/A
Q3/1961	1961-09-30	861.107	137.588	102.066	147.191	109.426	83.601	17969	25.969				Q3/1961	#N/A	#N/A	#N/A	#N/A	#N/A	#N/A	Q3/1961	#N/A	#N/A	#N/A		147.191	8.3566	#N/A
Q4/1961	1961-12-31	873.319	137.588	103.938	150.68	110.485	83.267	18351	26.331				Q4/1961	#N/A	#N/A	#N/A	#N/A	#N/A	#N/A	Q4/1961	#N/A	#N/A	#N/A		150.68	9.8245	#N/A
Q1/1962	1962-03-31	892.459	139.716	105.86	154.734	111.376	83.942	18625	26.677				Q1/1962	#N/A	#N/A	#N/A	#N/A	#N/A	#N/A	Q1/1962	#N/A	#N/A	#N/A		154.734	11.2054	#N/A
Q2/1962	1962-06-30	904.071	140.748	107.594	158.339	112.532	86.675	19072	27.147				Q2/1962	#N/A	#N/A	#N/A	#N/A	#N/A	#N/A	Q2/1962	#N/A	#N/A	#N/A		158.339	9.648	#N/A
Q3/1962	1962-09-30	923.531	140.748	109.131	161.493	113.736	85.796	19422	27.742				Q3/1962	#N/A	#N/A	#N/A	#N/A	#N/A	#N/A	Q3/1962	#N/A	#N/A	#N/A		161.493	8.2092	#N/A
Q4/1962	1962-12-31	928.176	141.668	110.464	164.438	114.972	87.589	19710	28.516				Q4/1962	#N/A	#N/A	#N/A	#N/A	#N/A	#N/A	Q4/1962	#N/A	#N/A	#N/A		164.438	7.4979	#N/A
Q1/1963	1963-03-31	926.755	144.06	111.088	167.175	116.122	89.088	20009	29.468				Q1/1963	#N/A	#N/A	#N/A	#N/A	#N/A	#N/A	Q1/1963	#N/A	#N/A	#N/A		167.175	6.8259	#N/A
Q2/1963	1963-06-30	928.135	142.612	113.301	169.269	117.378	89.061	20718	30.134				Q2/1963	#N/A	#N/A	#N/A	#N/A	#N/A	#N/A	Q2/1963	#N/A	#N/A	#N/A		169.269	5.1054	#N/A
Q3/1963	1963-09-30	961.59	142.612	115.381	170.721	118.632	91.065	20870	30.514				Q3/1963	#N/A	#N/A	#N/A	#N/A	#N/A	#N/A	Q3/1963	#N/A	#N/A	#N/A		170.721	3.4736	#N/A
Q4/1963	1963-12-31	960.429	145.396	117.073	171.323	119.878	91.583	21037	30.61				Q4/1963	#N/A	#N/A	#N/A	#N/A	#N/A	#N/A	Q4/1963	#N/A	#N/A	#N/A		171.323	1.4189	#N/A
Q1/1964	1964-03-31	962.45	145.872	118.846	171.077	121.17	96.45	21351	30.421				Q1/1964	#N/A	#N/A	#N/A	#N/A	#N/A	#N/A	Q1/1964	#N/A	#N/A	#N/A		171.077	-0.5741	#N/A
Q2/1964	1964-06-30	968.857	145.876	120.339	171.651	122.389	94.827	20950	30.402				Q2/1964	#N/A	#N/A	#N/A	#N/A	#N/A	#N/A	Q2/1964	#N/A	#N/A	#N/A		171.651	1.3497	#N/A
Q3/1964	1964-09-30	968.537	147.572	122.037	173.046	123.601	94.112	21278	30.551				Q3/1964	#N/A	#N/A	#N/A	#N/A	#N/A	#N/A	Q3/1964	#N/A	#N/A	#N/A		173.046	3.2909	#N/A
Q4/1964	1964-12-31	963.832	147.232	123.545	175.199	124.814	96.975	21507	30.831				Q4/1964	#N/A	#N/A	#N/A	#N/A	#N/A	#N/A	Q4/1964	#N/A	#N/A	#N/A		175.199	5.0697	#N/A
Q1/1965	1965-03-31	967.556	143.204	124.872	178.109	125.983	98.222	21876	31.241				Q1/1965	#N/A	#N/A	#N/A	#N/A	#N/A	#N/A	Q1/1965	#N/A	#N/A	#N/A		178.109	6.8121	#N/A
Q2/1965	1965-06-30	981.01	153.484	126.318	180.486	127.222	98.917	21620	31.562				Q2/1965	#N/A	#N/A	#N/A	#N/A	#N/A	#N/A	Q2/1965	#N/A	#N/A	#N/A		180.486	5.4469	#N/A
Q3/1965	1965-09-30	1011.34	152.4	127.578	182.331	128.48	100.062	21942	31.793				Q3/1965	#N/A	#N/A	#N/A	#N/A	#N/A	#N/A	Q3/1965	#N/A	#N/A	#N/A		182.331	4.1506	#N/A
Q4/1965	1965-12-31	1039.95	152.184	128.843	183.724	129.754	102.312	22278	31.952				Q4/1965	#N/A	#N/A	#N/A	#N/A	#N/A	#N/A	Q4/1965	#N/A	#N/A	#N/A		183.724	3.0907	#N/A
Q1/1966	1966-03-31	1048.54	151.056	130.29	184.665	130.877	104.186	22592	32.04				Q1/1966	#N/A	#N/A	#N/A	#N/A	#N/A	#N/A	Q1/1966	#N/A	#N/A	#N/A		184.665	2.065	#N/A
Q2/1966	1966-06-30	1082.97	154.796	131.915	185.956	132.19	106.885	22838	32.168				Q2/1966	#N/A	#N/A	#N/A	#N/A	#N/A	#N/A	Q2/1966	#N/A	#N/A	#N/A		185.956	2.8272	#N/A
Q3/1966	1966-09-30	1104.84	156.86	133.685	187.598	133.566	109.585	23018	32.337				Q3/1966	#N/A	#N/A	#N/A	#N/A	#N/A	#N/A	Q3/1966	#N/A	#N/A	#N/A		187.598	3.5791	#N/A
Q4/1966	1966-12-31	1117.29	157.06	135.556	189.656	135.054	112.843	23228	32.539				Q4/1966	#N/A	#N/A	#N/A	#N/A	#N/A	#N/A	Q4/1966	#N/A	#N/A	#N/A		189.656	4.4608	#N/A
Q1/1967	1967-03-31	1168.62	162.08	137.673	192.13	135.969	113.034	23358	32.774				Q1/1967	#N/A	#N/A	#N/A	#N/A	#N/A	#N/A	Q1/1967	#N/A	#N/A	#N/A		192.13	5.3208	#N/A
Q2/1967	1967-06-30	1173.17	163.104	139.328	193.825	137.796	117.928	23583	32.974				Q2/1967	#N/A	#N/A	#N/A	#N/A	#N/A	#N/A	Q2/1967	#N/A	#N/A	#N/A		193.825	3.575	#N/A
Q3/1967	1967-09-30	1183.62	163.008	140.857	194.74	139.695	118.909	23851	33.139				Q3/1967	#N/A	#N/A	#N/A	#N/A	#N/A	#N/A	Q3/1967	#N/A	#N/A	#N/A		194.74	1.9023	#N/A
Q4/1967	1967-12-31	1196.13	166.832	142.008	194.761	141.529	119.857	24030	33.258				Q4/1967	#N/A	#N/A	#N/A	#N/A	#N/A	#N/A	Q4/1967	#N/A	#N/A	#N/A		194.761	0.043	#N/A
Q1/1968	1968-03-31	1228.37	167.02	143.075	192.435	144.182	120.818	24307	33.332				Q1/1968	#N/A	#N/A	#N/A	#N/A	#N/A	#N/A	Q1/1968	#N/A	#N/A	#N/A		192.435	-4.6935	#N/A
Q2/1968	1968-06-30	1231.49	165.764	143.854	191.844	145.514	123.599	24692	33.493				Q2/1968	#N/A	#N/A	#N/A	#N/A	#N/A	#N/A	Q2/1968	#N/A	#N/A	#N/A		191.844	-1.2209	#N/A
Q3/1968	1968-09-30	1237.05	166.568	147.607	196.182	146.587	126.612	25074	33.742				Q3/1968	#N/A	#N/A	#N/A	#N/A	#N/A	#N/A	Q3/1968	#N/A	#N/A	#N/A		196.182	9.3556	#N/A
Q4/1968	1968-12-31	1246.54	165.228	149.662	199.641	147.478	128.806	25178	34.063				Q4/1968	#N/A	#N/A	#N/A	#N/A	#N/A	#N/A	Q4/1968	#N/A	#N/A	#N/A		199.641	7.2404	#N/A
Q1/1969	1969-03-31	1240.08	165.036	151.575	201.639	148.783	128.097	25490	34.455				Q1/1969	#N/A	#N/A	#N/A	#N/A	#N/A	#N/A	Q1/1969	#N/A	#N/A	#N/A		201.639	4.0649	#N/A
Q2/1969	1969-06-30	1255.09	162.488	154.062	202.46	149.55	131.274	25635	34.882				Q2/1969	#N/A	#N/A	#N/A	#N/A	#N/A	#N/A	Q2/1969	#N/A	#N/A	#N/A		202.46	1.6388	#N/A
Q3/1969	1969-09-30	1258.48	162.316	156.019	204.427	150.385	131.11	25887	35.342				Q3/1969	#N/A	#N/A	#N/A	#N/A	#N/A	#N/A	Q3/1969	#N/A	#N/A	#N/A		204.427	3.943	#N/A
Q4/1969	1969-12-31	1261	163.764	157.88	205.5	151.383	133.482	26265	35.863				Q4/1969	#N/A	#N/A	#N/A	#N/A	#N/A	#N/A	Q4/1969	#N/A	#N/A	#N/A		205.5	2.1154	#N/A
Q1/1970	1970-03-31	1244.64	162.428	159.589	202.392	149.306	138.424	26570	36.997				Q1/1970	50.84	#N/A	#N/A	100	#N/A	#N/A	Q1/1970	#N/A	#N/A	#N/A		202.392	-5.9139	#N/A
Q2/1970	1970-06-30	1232.39	167.76	161.902	209.345	152.848	143.304	26680	37.018				Q2/1970	52.59	#N/A	#N/A	103.442	#N/A	#N/A	Q2/1970	#N/A	#N/A	#N/A		209.345	14.4654	#N/A
Q3/1970	1970-09-30	1234.67	166.644	164.118	213.349	155.716	140.333	27243	37.142				Q3/1970	53.59	#N/A	#N/A	105.409	#N/A	#N/A	Q3/1970	#N/A	#N/A	#N/A		213.349	7.8732	#N/A
Q4/1970	1970-12-31	1236.27	168	166.811	223.942	157.647	143.4	27752	37.473				Q4/1970	56.24	#N/A	#N/A	110.622	#N/A	#N/A	Q4/1970	#N/A	#N/A	#N/A		223.942	21.3888	#N/A
Q1/1971	1971-03-31	1235.97	168.98	169.939	218.545	158.879	140.776	27936	37.777				Q1/1971	54.9	#N/A	#N/A	107.986	#N/A	#N/A	Q1/1971	#N/A	#N/A	#N/A		218.545	-9.2958	#N/A
Q2/1971	1971-06-30	1234.89	172.144	172.347	225.498	160.648	145.547	28127	38.522				Q2/1971	56.65	#N/A	#N/A	111.428	#N/A	#N/A	Q2/1971	#N/A	#N/A	#N/A		225.498	13.345	#N/A
Q3/1971	1971-09-30	1233.03	173.724	174.615	228.155	162.626	148.417	28555	39.08				Q3/1971	57.33	#N/A	#N/A	112.766	#N/A	#N/A	Q3/1971	#N/A	#N/A	#N/A		228.155	4.7975	#N/A
Q4/1971	1971-12-31	1232.23	173.364	176.684	231.03	164.863	149.991	28886	39.653				Q4/1971	58.04	#N/A	#N/A	114.162	#N/A	#N/A	Q4/1971	#N/A	#N/A	#N/A		231.03	5.1375	#N/A
Q1/1972	1972-03-31	1244.04	177.444	177.941	233.479	167.695	147.183	29336	39.784				Q1/1972	58.65	#N/A	#N/A	115.362	#N/A	#N/A	Q1/1972	#N/A	#N/A	#N/A		233.479	4.3067	#N/A
Q2/1972	1972-06-30	1251.11	179.08	180.332	234.097	169.768	149.303	29699	40.481				Q2/1972	58.81	#N/A	#N/A	115.677	#N/A	#N/A	Q2/1972	#N/A	#N/A	#N/A		234.097	1.0643	#N/A
Q3/1972	1972-09-30	1234.01	181.496	182.5	237.155	171.219	152.772	29826	41.108				Q3/1972	59.57	#N/A	#N/A	117.172	#N/A	#N/A	Q3/1972	#N/A	#N/A	#N/A		237.155	5.328	#N/A
Q4/1972	1972-12-31	1230.01	183.068	185.089	242.797	172.333	155.076	30279	41.715				Q4/1972	60.99	#N/A	#N/A	119.965	#N/A	#N/A	Q4/1972	#N/A	#N/A	#N/A		242.797	9.8614	#N/A
Q1/1973	1973-03-31	1230.31	185.016	189.253	249.022	173.647	154.817	30572	42.329				Q1/1973	62.56	#N/A	#N/A	123.053	#N/A	#N/A	Q1/1973	#N/A	#N/A	#N/A		249.022	10.656	#N/A
Q2/1973	1973-06-30	1230.87	186.392	192.278	250.696	175.355	156.692	31312	43.005				Q2/1973	62.97	#N/A	#N/A	123.859	#N/A	#N/A	Q2/1973	#N/A	#N/A	#N/A		250.696	2.7169	#N/A
Q3/1973	1973-09-30	1221.98	188.072	194.672	248.986	176.837	157.455	31556	43.667				Q3/1973	62.56	#N/A	#N/A	123.053	#N/A	#N/A	Q3/1973	#N/A	#N/A	#N/A		248.986	-2.702	#N/A
Q4/1973	1973-12-31	1227.24	188.432	196.916	257.431	178.29	163.487	32140	44.536				Q4/1973	64.66	#N/A	#N/A	127.183	#N/A	#N/A	Q4/1973	#N/A	#N/A	#N/A		257.431	14.2733	#N/A
Q1/1974	1974-03-31	1247.4	186	198.654	261.544	179.625	162.26	30478	45.847				Q1/1974	65.7	#N/A	#N/A	129.229	#N/A	#N/A	Q1/1974	#N/A	#N/A	#N/A		261.544	6.5461	#N/A
Q2/1974	1974-06-30	1244.9	189.264	201.889	265.475	180.184	166.575	31076	47.205				Q2/1974	66.67	#N/A	#N/A	131.137	#N/A	#N/A	Q2/1974	#N/A	#N/A	#N/A		265.475	6.1495	#N/A
Q3/1974	1974-09-30	1254.31	191.6	203.525	266.167	181.264	169.063	31383	48.006				Q3/1974	66.86	#N/A	#N/A	131.511	#N/A	#N/A	Q3/1974	#N/A	#N/A	#N/A		266.167	1.0462	#N/A
Q4/1974	1974-12-31	1263.98	194.32	206.742	269.043	182.511	171.258	32114	48.606				Q4/1974	67.59	#N/A	#N/A	132.946	#N/A	#N/A	Q4/1974	#N/A	#N/A	#N/A		269.043	4.3922	#N/A
Q1/1975	1975-03-31	1272.07	202.096	209.332	270.235	183.596	172.628	34185	49.178				Q1/1975	67.88	#N/A	#N/A	133.517	#N/A	#N/A	Q1/1975	#N/A	#N/A	#N/A		270.235	1.7846	#N/A
Q2/1975	1975-06-30	1283.06	199.372	212.791	276.532	185.133	178.374	34961	49.668				Q2/1975	69.46	#N/A	#N/A	136.625	#N/A	#N/A	Q2/1975	#N/A	#N/A	#N/A		276.532	9.652	#N/A
Q3/1975	1975-09-30	1286.61	199.952	215.313	282.102	186.824	180.439	35611	49.944				Q3/1975	70.88	#N/A	#N/A	139.418	#N/A	#N/A	Q3/1975	#N/A	#N/A	#N/A		282.102	8.3024	#N/A
Q4/1975	1975-12-31	1286	204.016	218.631	280.828	188.506	180.283	36040	50.744				Q4/1975	70.55	#N/A	#N/A	138.769	#N/A	#N/A	Q4/1975	#N/A	#N/A	#N/A		280.828	-1.7942	#N/A
Q1/1976	1976-03-31	1281.82	204.08	220.677	280.591	189.809	179.11	36059	51.889				Q1/1976	70.47	#N/A	#N/A	138.611	#N/A	#N/A	Q1/1976	#N/A	#N/A	#N/A		280.591	-0.3366	#N/A
Q2/1976	1976-06-30	1286.46	205.796	222.112	282.811	190.586	181.087	36506	53.027				Q2/1976	71.03	#N/A	#N/A	139.713	#N/A	#N/A	Q2/1976	#N/A	#N/A	#N/A		282.811	3.2033	#N/A
Q3/1976	1976-09-30	1282.38	204.94	223.728	284.377	192.012	180.098	36928	53.903				Q3/1976	71.44	#N/A	#N/A	140.519	#N/A	#N/A	Q3/1976	#N/A	#N/A	#N/A		284.377	2.2324	#N/A
Q4/1976	1976-12-31	1288.75	203.224	224.376	285.505	193.824	182.048	37257	54.482				Q4/1976	71.72	#N/A	#N/A	141.07	#N/A	#N/A	Q4/1976	#N/A	#N/A	#N/A		285.505	1.5968	#N/A
Q1/1977	1977-03-31	1296.19	201.188	225.636	286.734	195.629	184.999	37666	54.772				Q1/1977	72.03	#N/A	#N/A	141.68	#N/A	#N/A	Q1/1977	#N/A	#N/A	#N/A		286.734	1.7323	#N/A
Q2/1977	1977-06-30	1306.83	202.644	227.872	285.46	197.986	188.585	37856	55.117				Q2/1977	71.72	#N/A	#N/A	141.07	#N/A	#N/A	Q2/1977	#N/A	#N/A	#N/A		285.46	-1.7656	#N/A
Q3/1977	1977-09-30	1317.22	202.2	230.868	289.609	200.476	187.29	38350	55.434				Q3/1977	72.75	#N/A	#N/A	143.096	#N/A	#N/A	Q3/1977	#N/A	#N/A	#N/A		289.609	5.9429	#N/A
Q4/1977	1977-12-31	1319.66	201.752	234.309	295.397	202.653	188.741	39005	56.296				Q4/1977	74.21	#N/A	#N/A	145.968	#N/A	#N/A	Q4/1977	#N/A	#N/A	#N/A		295.397	8.2368	#N/A
Q1/1978	1978-03-31	1326.27	203.932	239.492	297.026	204.201	188.101	39414	57.42				Q1/1978	74.6	#N/A	#N/A	146.735	#N/A	#N/A	Q1/1978	#N/A	#N/A	#N/A		297.026	2.2243	#N/A
Q2/1978	1978-06-30	1334.63	204.256	243.195	298.337	206.011	189.416	39904	58.09				Q2/1978	74.94	#N/A	#N/A	147.404	#N/A	#N/A	Q2/1978	#N/A	#N/A	#N/A		298.337	1.7764	#N/A
Q3/1978	1978-09-30	1339.18	206.196	246.218	303.032	207.77	189.812	40475	58.669				Q3/1978	76.12	#N/A	#N/A	149.725	#N/A	#N/A	Q3/1978	#N/A	#N/A	#N/A		303.032	6.446	#N/A
Q4/1978	1978-12-31	1345.64	207.192	248.924	307	209.516	189.75	41048	59.4				Q4/1978	77.12	#N/A	#N/A	151.692	#N/A	#N/A	Q4/1978	#N/A	#N/A	#N/A		307	5.341	#N/A
Q1/1979	1979-03-31	1353.31	206.232	250.065	309.403	210.504	189.225	41608	59.966				Q1/1979	77.71	#N/A	#N/A	152.852	#N/A	#N/A	Q1/1979	#N/A	#N/A	#N/A		309.403	3.1676	#N/A
Q2/1979	1979-06-30	1356	210.396	251.407	312.824	211.518	191.87	41912	60.49				Q2/1979	78.59	#N/A	#N/A	154.583	#N/A	#N/A	Q2/1979	#N/A	#N/A	#N/A		312.824	4.4974	#N/A
Q3/1979	1979-09-30	1338.56	208.268	253.529	314.426	212.682	190.521	42113	61.083				Q3/1979	79	#N/A	#N/A	155.389	#N/A	#N/A	Q3/1979	#N/A	#N/A	#N/A		314.426	2.0637	#N/A
Q4/1979	1979-12-31	1350.27	209.356	255.747	316.537	213.459	191.768	41967	61.855				Q4/1979	79.51	#N/A	#N/A	156.393	#N/A	#N/A	Q4/1979	#N/A	#N/A	#N/A		316.537	2.713	#N/A
Q1/1980	1980-03-31	1364.83	210.508	257.592	320.15	214.42	192.981	42583	60.909				Q1/1980	80.41	#N/A	#N/A	158.163	#N/A	#N/A	Q1/1980	#N/A	#N/A	#N/A		320.15	4.6443	#N/A
Q2/1980	1980-06-30	1384.03	208.668	259.692	325.902	215.976	195.49	42889	63.293				Q2/1980	81.87	#N/A	#N/A	161.035	#N/A	#N/A	Q2/1980	#N/A	#N/A	#N/A		325.902	7.3818	#N/A
Q3/1980	1980-09-30	1374.15	211.988	261.796	325.938	218.222	198.073	43374	64.44				Q3/1980	81.87	#N/A	#N/A	161.035	#N/A	#N/A	Q3/1980	#N/A	#N/A	#N/A		325.938	0.0447	#N/A
Q4/1980	1980-12-31	1369.75	212.728	263.096	324.737	220.161	197.173	43969	64.974				Q4/1980	81.57	#N/A	#N/A	160.445	#N/A	#N/A	Q4/1980	#N/A	#N/A	#N/A		324.737	-1.466	#N/A
Q1/1981	1981-03-31	1382.12	210.244	264.728	346.951	221.341	198.366	44473	65.823				Q1/1981	87.16	#N/A	#N/A	171.44	#N/A	#N/A	Q1/1981	#N/A	#N/A	#N/A		346.951	30.3006	#N/A
Q2/1981	1981-06-30	1397.9	212.112	266.94	335.011	223.604	197.981	45407	64.938				Q2/1981	84.15	#N/A	#N/A	165.519	#N/A	#N/A	Q2/1981	#N/A	#N/A	#N/A		335.011	-13.0712	#N/A
Q3/1981	1981-09-30	1400.2	212.416	269.4	337.523	225.622	200.395	45901	65.921				Q3/1981	84.78	#N/A	#N/A	166.758	#N/A	#N/A	Q3/1981	#N/A	#N/A	#N/A		337.523	3.0329	#N/A
Q4/1981	1981-12-31	1409.75	208.336	270.936	336.686	227.32	200.943	46541	67.249				Q4/1981	84.58	#N/A	#N/A	166.365	#N/A	#N/A	Q4/1981	#N/A	#N/A	#N/A		336.686	-0.9885	#N/A
Q1/1982	1982-03-31	1418.68	211.32	275.236	340.999	228.258	199.248	47038	68.511				Q1/1982	85.67	#N/A	#N/A	168.509	#N/A	#N/A	Q1/1982	#N/A	#N/A	#N/A		340.999	5.2239	#N/A
Q2/1982	1982-06-30	1418	211.668	277.516	335.976	230.091	201.288	47331	68.748				Q2/1982	84.41	#N/A	#N/A	166.031	#N/A	#N/A	Q2/1982	#N/A	#N/A	#N/A		335.976	-5.7635	#N/A
Q3/1982	1982-09-30	1434.02	212	282.132	333.5	231.619	203.003	47823	69.44				Q3/1982	83.78	#N/A	#N/A	164.792	#N/A	#N/A	Q3/1982	#N/A	#N/A	#N/A		333.5	-2.9145	#N/A
Q4/1982	1982-12-31	1451.47	213.384	284.008	331.608	234.328	203.577	48299	69.84				Q4/1982	83.3	#N/A	#N/A	163.847	#N/A	#N/A	Q4/1982	#N/A	#N/A	#N/A		331.608	-2.251	#N/A
Q1/1983	1983-03-31	1464.07	212.736	285.564	334.529	236.861	200.052	49278	70.659				Q1/1983	84.04	#N/A	#N/A	165.303	#N/A	#N/A	Q1/1983	#N/A	#N/A	#N/A		334.529	3.5704	#N/A
Q2/1983	1983-06-30	1474.46	216.496	285.596	333.473	239.256	203.77	50165	71.151				Q2/1983	83.77	#N/A	#N/A	164.772	#N/A	#N/A	Q2/1983	#N/A	#N/A	#N/A		333.473	-1.2563	#N/A
Q3/1983	1983-09-30	1491.56	215.424	287.492	332.381	240.935	205.911	50762	71.703				Q3/1983	83.51	#N/A	#N/A	164.26	#N/A	#N/A	Q3/1983	#N/A	#N/A	#N/A		332.381	-1.3035	#N/A
Q4/1983	1983-12-31	1456.04	216.996	289.064	335.402	241.168	206.14	51100	72.007				Q4/1983	84.25	#N/A	#N/A	165.716	#N/A	#N/A	Q4/1983	#N/A	#N/A	#N/A		335.402	3.6859	#N/A
Q1/1984	1984-03-31	1462.65	218.536	289.324	336.13	240.896	206.65	51535	72.419				Q1/1984	84.43	#N/A	#N/A	166.07	#N/A	#N/A	Q1/1984	#N/A	#N/A	#N/A		336.13	0.8711	#N/A
Q2/1984	1984-06-30	1492.48	216.452	291.444	338.023	242.086	206.728	52228	72.316				Q2/1984	84.9	#N/A	#N/A	166.994	#N/A	#N/A	Q2/1984	#N/A	#N/A	#N/A		338.023	2.2717	#N/A
Q3/1984	1984-09-30	1501.83	218.044	295.072	336.931	244.72	209.129	52319	73.099				Q3/1984	84.64	#N/A	#N/A	166.483	#N/A	#N/A	Q3/1984	#N/A	#N/A	#N/A		336.931	-1.286	#N/A
Q4/1984	1984-12-31	1521.71	218.852	296.628	340.935	245.766	211.794	52032	73.002				Q4/1984	85.66	#N/A	#N/A	168.489	#N/A	#N/A	Q4/1984	#N/A	#N/A	#N/A		340.935	4.8391	#N/A
Q1/1985	1985-03-31	1540.63	221.248	298.74	338.688	249.011	214.999	52154	74.458				Q1/1985	85.08	#N/A	#N/A	167.349	#N/A	#N/A	Q1/1985	#N/A	#N/A	#N/A		338.688	-2.6113	#N/A
Q2/1985	1985-06-30	1561.83	213.968	301.292	339.161	251.599	216.846	52490	74.161				Q2/1985	85.2	#N/A	#N/A	167.585	#N/A	#N/A	Q2/1985	#N/A	#N/A	#N/A		339.161	0.5601	#N/A
Q3/1985	1985-09-30	1596.86	216.808	302.3	341.563	249.066	215.164	53008	76.867				Q3/1985	85.8	#N/A	#N/A	168.765	#N/A	#N/A	Q3/1985	#N/A	#N/A	#N/A		341.563	2.8637	#N/A
Q4/1985	1985-12-31	1611.9	217.208	304.744	343.529	251.482	220.498	53470	77.959				Q4/1985	86.3	#N/A	#N/A	169.748	#N/A	#N/A	Q4/1985	#N/A	#N/A	#N/A		343.529	2.322	#N/A
Q1/1986	1986-03-31	1627.56	222.576	306.188	341.218	252.933	220.616	53479	78.985				Q1/1986	85.73	#N/A	#N/A	168.627	#N/A	#N/A	Q1/1986	#N/A	#N/A	#N/A		341.218	-2.6644	#N/A
Q2/1986	1986-06-30	1659.63	221.168	308.276	345.95	254.329	219.172	53147	78.972				Q2/1986	86.91	#N/A	#N/A	170.948	#N/A	#N/A	Q2/1986	#N/A	#N/A	#N/A		345.95	5.6637	#N/A
Q3/1986	1986-09-30	1683.65	219.292	310.388	348.134	257.635	221.35	54632	78.863				Q3/1986	87.46	#N/A	#N/A	172.03	#N/A	#N/A	Q3/1986	#N/A	#N/A	#N/A		348.134	2.5493	#N/A
Q4/1986	1986-12-31	1682.59	219.348	312.98	347.296	260.893	220.519	57053	80.726				Q4/1986	87.25	#N/A	#N/A	171.617	#N/A	#N/A	Q4/1986	#N/A	#N/A	#N/A		347.296	-0.9585	#N/A
Q1/1987	1987-03-31	1683.61	219.008	314.032	346.878	262.715	222.369	55781	82.941				Q1/1987	87.12	#N/A	#N/A	171.361	#N/A	#N/A	Q1/1987	#N/A	#N/A	#N/A		346.878	-0.4813	#N/A
Q2/1987	1987-06-30	1687.74	222.472	316.04	346.842	266.481	224.07	56775	86.618				Q2/1987	87.12	#N/A	#N/A	171.361	#N/A	#N/A	Q2/1987	#N/A	#N/A	#N/A		346.842	-0.0419	#N/A
Q3/1987	1987-09-30	1683.35	221.7	318.784	347.315	270.671	222.519	57164	88.007				Q3/1987	87.25	#N/A	#N/A	171.617	#N/A	#N/A	Q3/1987	#N/A	#N/A	#N/A		347.315	0.5468	#N/A
Q4/1987	1987-12-31	1714.83	221.036	322.828	350.081	274.609	225.305	57143	89.093				Q4/1987	87.95	#N/A	#N/A	172.994	#N/A	#N/A	Q4/1987	#N/A	#N/A	#N/A		350.081	3.2247	#N/A
Q1/1988	1988-03-31	1715.89	221.828	326.344	351.046	276.974	227.971	58245	89.039				Q1/1988	88.18	#N/A	#N/A	173.446	#N/A	#N/A	Q1/1988	#N/A	#N/A	#N/A		351.046	1.1066	#N/A
Q2/1988	1988-06-30	1712.22	221.548	328.272	350.609	279.275	230.085	58768	88.651				Q2/1988	88.07	#N/A	#N/A	173.23	#N/A	#N/A	Q2/1988	#N/A	#N/A	#N/A		350.609	-0.4968	#N/A
Q3/1988	1988-09-30	1711.06	219.688	330.26	352.648	280.148	231.126	59251	89.591				Q3/1988	88.58	#N/A	#N/A	174.233	#N/A	#N/A	Q3/1988	#N/A	#N/A	#N/A		352.648	2.346	#N/A
Q4/1988	1988-12-31	1745.68	222.816	329.596	357.161	280.352	231.196	59546	92.012				Q4/1988	89.71	#N/A	#N/A	176.456	#N/A	#N/A	Q4/1988	#N/A	#N/A	#N/A		357.161	5.2189	#N/A
Q1/1989	1989-03-31	1732.75	221.172	331.58	343.656	279.602	232.066	60070	95.016				Q1/1989	86.33	#N/A	#N/A	169.807	#N/A	#N/A	Q1/1989	#N/A	#N/A	#N/A		343.656	-14.2883	#N/A
Q2/1989	1989-06-30	1760.07	222.232	331.928	347.333	279.952	235.266	60482	96.824				Q2/1989	87.25	#N/A	#N/A	171.617	#N/A	#N/A	Q2/1989	#N/A	#N/A	#N/A		347.333	4.3485	#N/A
Q3/1989	1989-09-30	1768.94	225.7	333.772	346.277	280.484	238.015	60796	98.772				Q3/1989	86.99	#N/A	#N/A	171.105	#N/A	#N/A	Q3/1989	#N/A	#N/A	#N/A		346.277	-1.2102	#N/A
Q4/1989	1989-12-31	1780.25	224.668	336.608	344.166	282.484	237.681	61318	98.614				Q4/1989	86.46	#N/A	#N/A	170.063	#N/A	#N/A	Q4/1989	#N/A	#N/A	#N/A		344.166	-2.4165	#N/A
Q1/1990	1990-03-31	1797.77	226.68	340.588	349.845	284.292	242.31	61666	99.384				Q1/1990	87.89	#N/A	#N/A	172.876	#N/A	#N/A	Q1/1990	#N/A	#N/A	#N/A		349.845	6.765	#N/A
Q2/1990	1990-06-30	1801.87	227.604	341.688	353.521	286.609	239.438	62601	102.934				Q2/1990	88.8	#N/A	#N/A	174.666	#N/A	#N/A	Q2/1990	#N/A	#N/A	#N/A		353.521	4.2703	#N/A
Q3/1990	1990-09-30	1801.73	229.472	345.852	352.138	288.083	244.725	62772	104.542				Q3/1990	88.47	#N/A	#N/A	174.017	#N/A	#N/A	Q3/1990	#N/A	#N/A	#N/A		352.138	-1.556	#N/A
Q4/1990	1990-12-31	1816.28	231.52	347.972	353.849	289.881	247.452	63662	106.769				Q4/1990	88.89	#N/A	#N/A	174.843	#N/A	#N/A	Q4/1990	#N/A	#N/A	#N/A		353.849	1.9576	#N/A
Q1/1991	1991-03-31	1834.79	232.036	351.024	353.907	290.502	246.173	64524	105.604				Q1/1991	88.48	353.907	353.907	174.036	#N/A	#N/A	Q1/1991	#N/A	#N/A	#N/A		353.907	0.0659	#N/A
Q2/1991	1991-06-30	1835.07	238.216	355.604	358.84	291.889	250.796	64734	107.521				Q2/1991	89.71	358.84	358.84	176.456	#N/A	5.69314	Q2/1991	5.6934	5.69314	0.00026469		358.84	6.9166	-1.2232
Q3/1991	1991-09-30	1824.62	236.368	357.392	368.608	294.309	248.979	65481	111.071				Q3/1991	92.16	368.608	368.608	181.275	#N/A	11.3411	Q3/1991	11.3408	11.3411	-0.000332494		368.608	9.6661	1.6747
Q4/1991	1991-12-31	1816	235.956	360.212	370.137	294.002	250.921	66137	114.396				Q4/1991	92.54	370.137	370.137	182.022	#N/A	1.66957	Q4/1991	1.6699	1.66957	0.00033248		370.137	6.2881	-4.6182
Q1/1992	1992-03-31	1822.36	236.832	362.44	377.76	295.66	251.321	66277	115.956				Q1/1992	94.44	377.76	377.76	185.759	#N/A	8.49604	Q1/1992	8.495	8.49604	-0.00103731		377.76	3.6061	4.8889
Q2/1992	1992-06-30	1826.17	237.924	364.876	381.361	296.625	249.919	66377	114.311				Q2/1992	95.34	381.361	381.361	187.53	#N/A	3.86787	Q2/1992	3.8684	3.86787	0.000528508		381.361	5.0611	-1.1927
Q3/1992	1992-09-30	1844.25	237.868	369.328	386.048	295.35	249.861	67173	112.357				Q3/1992	96.51	386.048	386.048	189.831	#N/A	5.00745	Q3/1992	5.0073	5.00745	-0.000151037		386.048	3.8027	1.2046
Q4/1992	1992-12-31	1850.33	238.956	372.752	385.111	294.238	253.877	68024	111.296				Q4/1992	96.27	385.111	385.111	189.359	#N/A	-0.967335	Q4/1992	-0.9677	-0.967335	-0.000365219		385.111	2.9207	-3.8884
Q1/1993	1993-03-31	1834.51	236.776	376.796	387.022	292.412	251.445	68350	113.893				Q1/1993	96.76	387.022	387.022	190.323	#N/A	1.99971	Q1/1993	2.0003	1.99971	0.000594693		387.022	-1.9436	3.9439
Q2/1993	1993-06-30	1826.88	234.644	381.008	385.493	290.913	252.521	68806	115.622				Q2/1993	96.37	385.493	385.493	189.555	#N/A	-1.57093	Q2/1993	-1.5713	-1.57093	-0.00036816		385.493	-1.5919	0.0206
Q3/1993	1993-09-30	1827.44	237.344	381.588	384.605	290.482	249.602	69515	118.662				Q3/1993	96.15	384.605	384.605	189.123	#N/A	-0.918239	Q3/1993	-0.9183	-0.918239	-6.13923e-05		384.605	-1.6437	0.7254
Q4/1993	1993-12-31	1832.24	237.14	382.452	380.707	289.795	249.396	69740	117.806				Q4/1993	95.18	380.707	380.707	187.215	#N/A	-3.99281	Q4/1993	-3.9921	-3.99281	0.000713002		380.707	-2.0143	-1.9778
Q1/1994	1994-03-31	1826.88	236.804	381.776	394.089	288.685	245.764	70560	117.479				Q1/1994	98.52	394.089	394.089	193.784	#N/A	14.819	Q1/1994	14.8186	14.819	-0.000411186		394.089	11.6891	3.1295
Q2/1994	1994-06-30	1828.85	240.36	381.628	396.112	287.659	248.876	71516	116.429				Q2/1994	99.02	396.112	396.112	194.768	#N/A	2.06921	Q2/1994	2.0689	2.06921	-0.000308278		396.112	2.2283	-0.1594
Q3/1994	1994-09-30	1849.34	240.148	381.608	396.26	284.641	249.112	71993	116.684				Q3/1994	99.06	396.26	396.26	194.847	#N/A	0.149536	Q3/1994	0.1496	0.149536	6.35387e-05		396.26	-0.5371	0.6867
Q4/1994	1994-12-31	1836.91	239.312	381.684	399.516	282.37	247.821	72133	117.891				Q4/1994	99.88	399.516	399.516	196.459	#N/A	3.32746	Q4/1994	3.3276	3.32746	0.000136951		399.516	6.2966	-2.969
Q1/1995	1995-03-31	1840.72	241.804	380.348	394.669	279.347	247.536	73607	119.96				Q1/1995	98.67	394.669	394.669	194.079	#N/A	-4.76527	Q1/1995	-4.7654	-4.76527	-0.000129772		394.669	-7.9982	3.2328
Q2/1995	1995-06-30	1845.24	242.716	380.504	402.759	276.885	246.807	73933	119.808				Q2/1995	100.69	402.759	402.759	198.053	#N/A	8.45484	Q2/1995	8.4556	8.45484	0.000755893		402.759	9.5374	-1.0818
Q3/1995	1995-09-30	1848.21	242.108	382.072	409.272	275.299	244.809	74784	119.832				Q3/1995	102.32	409.272	409.272	201.259	#N/A	6.62698	Q3/1995	6.626	6.62698	-0.000982624		409.272	6.7424	-0.1164
Q4/1995	1995-12-31	1822.92	243.148	383.868	413.958	275.433	242.581	74920	120.296				Q4/1995	103.49	413.958	413.958	203.56	#N/A	4.6591	Q4/1995	4.6598	4.6591	0.00070259		413.958	8.0047	-3.3449
Q1/1996	1996-03-31	1829.7	244.472	386.892	408.494	279.153	242.753	75511	120.38				Q1/1996	102.12	408.494	408.494	200.865	#N/A	-5.17614	Q1/1996	-5.176	-5.17614	0.000144907		408.494	-8.7714	3.5954
Q2/1996	1996-06-30	1851.74	242.776	389.56	413.971	277.584	242.73	75561	120.88				Q2/1996	103.49	413.971	413.971	203.56	#N/A	5.47194	Q2/1996	5.4711	5.47194	-0.00084285		413.971	6.1078	-0.6367
Q3/1996	1996-09-30	1843.4	244.236	391.648	418.608	279.684	239.024	75938	121.864				Q3/1996	104.65	418.608	418.608	205.842	#N/A	4.55635	Q3/1996	4.5569	4.55635	0.000548136		418.608	5.8815	-1.3246
Q4/1996	1996-12-31	1859.51	244.872	393.672	418.213	278.991	238.491	77035	122.616				Q4/1996	104.55	418.213	418.213	205.645	#N/A	-0.376908	Q4/1996	-0.3766	-0.376908	0.000307528		418.213	0.3392	-0.7158
Q1/1997	1997-03-31	1859.79	242.992	394.032	418.102	278.178	240.43	76963	123.3				Q1/1997	104.53	418.102	418.102	205.606	#N/A	-0.106124	Q1/1997	-0.1062	-0.106124	-7.62628e-05		418.102	-2.6909	2.5847
Q2/1997	1997-06-30	1880.84	240.276	394.532	421.21	281.556	238.637	77098	124.704				Q2/1997	105.3	421.21	421.21	207.12	#N/A	3.00676	Q2/1997	3.0068	3.00676	4.33029e-05		421.21	3.3207	-0.3139
Q3/1997	1997-09-30	1882.96	241.652	394.904	419.928	281.436	239.126	76980	125.228				Q3/1997	104.98	419.928	419.928	206.491	#N/A	-1.2119	Q3/1997	-1.2125	-1.2119	-0.000601897		419.928	-0.9683	-0.2442
Q4/1997	1997-12-31	1892.01	248.148	394.436	414.156	279.941	239.078	77410	125.52				Q4/1997	103.54	414.156	414.156	203.659	#N/A	-5.38576	Q4/1997	-5.3858	-5.38576	-3.79612e-05		414.156	-5.637	0.2512
Q1/1998	1998-03-31	1882.26	248.96	392.192	424.873	281.623	245.509	77259	126.804				Q1/1998	106.22	424.873	424.873	208.93	#N/A	10.7594	Q1/1998	10.7601	10.7594	0.000672311		424.873	11.2656	-0.5055
Q2/1998	1998-06-30	1908.82	251.188	391.052	428.031	282.755	242.991	77913	127.856				Q2/1998	107	428.031	428.031	210.464	#N/A	3.00644	Q2/1998	3.0058	3.00644	-0.000636287		428.031	2.833	0.1728
Q3/1998	1998-09-30	1909.24	252.124	390.976	427.537	283.574	243.915	78281	129.612				Q3/1998	106.88	427.537	427.537	210.228	#N/A	-0.46085	Q3/1998	-0.4602	-0.46085	0.000650222		427.537	-0.5391	0.0789
Q4/1998	1998-12-31	1935.38	254.352	392.976	427.439	284.346	243.262	78767	131.376				Q4/1998	106.86	427.439	427.439	210.189	#N/A	-0.0916565	Q4/1998	-0.0923	-0.0916565	-0.000643549		427.439	0.2916	-0.3839
Q1/1999	1999-03-31	1947.5	251.004	395.464	433.112	285.046	245.966	79709	132.724				Q1/1999	108.27	433.112	433.112	212.962	#N/A	5.41545	Q1/1999	5.4158	5.41545	0.000345373		433.112	4.2016	1.2142
Q2/1999	1999-06-30	1952.7	262.108	396.22	430.744	286.671	247.548	80407	133.86				Q2/1999	107.68	430.744	430.744	211.802	#N/A	-2.16909	Q2/1999	-2.1692	-2.16909	-0.000107058		430.744	-2.4464	0.2772
Q3/1999	1999-09-30	1974.14	263.82	398.34	432.964	285.849	251.477	81296	133.784				Q3/1999	108.24	432.964	432.964	212.903	#N/A	2.07754	Q3/1999	2.0776	2.07754	5.84044e-05		432.964	2.0445	0.0331
Q4/1999	1999-12-31	1998.28	265.404	400.712	430.744	291.336	251.805	81648	135.24				Q4/1999	107.68	430.744	430.744	211.802	#N/A	-2.03526	Q4/1999	-2.0354	-2.03526	-0.000141741		430.744	-1.4342	-0.6012
Q1/2000	2000-03-31	1974.16	261.76	402.912	438.822	291.805	254.658	82747	137.3				Q1/2000	109.71	438.822	438.822	215.795	#N/A	7.71511	Q1/2000	7.7156	7.71511	0.000491551		438.822	7.5545	0.1611
Q2/2000	2000-06-30	2011.6	271.112	404.72	436.8	292.765	257.471	83711	138.636				Q2/2000	109.2	436.8	436.8	214.792	#N/A	-1.83042	Q2/2000	-1.831	-1.83042	-0.000583611		436.8	-1.6142	-0.2168
Q3/2000	2000-09-30	2001.65	271.552	406.612	436.06	298.588	258.674	84336	141.256				Q3/2000	109.01	436.06	436.06	214.418	#N/A	-0.675936	Q3/2000	-0.676	-0.675936	-6.44428e-05		436.06	-0.7723	0.0963
Q4/2000	2000-12-31	2006.32	271.852	406.928	439.513	301.399	260.251	84804	141.86				Q4/2000	109.88	439.513	439.513	216.129	#N/A	3.20528	Q4/2000	3.2056	3.20528	0.000324104		439.513	2.8483	0.3573
Q1/2001	2001-03-31	2037.34	278.584	407.896	439.895	304.76	263.582	85056	142.828				Q1/2001	109.98	439.895	439.895	216.326	#N/A	0.348111	Q1/2001	0.3484	0.348111	0.00028897		439.895	0.977	-0.6286
Q2/2001	2001-06-30	2062.06	273.976	408.892	438.613	306.008	266.894	86642	144.4				Q2/2001	109.66	438.613	438.613	215.696	#N/A	-1.16065	Q2/2001	-1.1612	-1.16065	-0.000553373		438.613	-1.7684	0.6072
Q3/2001	2001-09-30	2080.85	280.632	410.24	438.07	308.155	267.661	87069	145.448				Q3/2001	109.52	438.07	438.07	215.421	#N/A	-0.494279	Q3/2001	-0.494	-0.494279	0.000278543		438.07	-1.3345	0.8405
Q4/2001	2001-12-31	2096.31	286.9	411.452	443.595	315.745	268.023	88273	147.652				Q4/2001	110.9	443.595	443.595	218.135	#N/A	5.1411	Q4/2001	5.1413	5.1411	0.00019952		443.595	6.3012	-1.1599
Q1/2002	2002-03-31	2124.05	284.904	413.244	441.548	310.49	269.886	88490	148.232				Q1/2002	110.38	441.548	441.548	217.113	#N/A	-1.83309	Q1/2002	-1.8334	-1.83309	-0.000309453		441.548	-1.5967	-0.2367
Q2/2002	2002-06-30	2145.07	291.384	415.636	443.817	314.513	270.993	88870	149.348				Q2/2002	110.95	443.817	443.817	218.234	#N/A	2.07139	Q2/2002	2.0717	2.07139	0.000306002		443.817	2.2363	-0.1646
Q3/2002	2002-09-30	2156.51	294.692	418.168	446.037	312.471	273.666	89542	151.652				Q3/2002	111.51	446.037	446.037	219.335	#N/A	2.01589	Q3/2002	2.016	2.01589	0.000112839		446.037	0.9659	1.0501
Q4/2002	2002-12-31	2171.04	296	420.9	449.935	311.575	275.738	89346	153.696				Q4/2002	112.48	449.935	449.935	221.243	#N/A	3.54177	Q4/2002	3.5413	3.54177	-0.000465701		449.935	3.444	0.0973
Q1/2003	2003-03-31	2161.85	297.244	421.356	444.582	314.173	278.766	89855	155.352				Q1/2003	111.15	444.582	444.582	218.627	#N/A	-4.67465	Q1/2003	-4.6744	-4.67465	0.000254139		444.582	-4.5609	-0.1135
Q2/2003	2003-06-30	2199.11	302.84	424.008	446.161	313.945	279.749	90628	157.612				Q2/2003	111.54	446.161	446.161	219.394	#N/A	1.42825	Q2/2003	1.4279	1.42825	-0.000346776		446.161	1.0071	0.4208
Q3/2003	2003-09-30	2186.83	305.624	425.872	449.466	320.578	280.473	90972	158.984				Q3/2003	112.37	449.466	449.466	221.027	#N/A	2.99614	Q3/2003	2.9964	2.99614	0.000257293		449.466	2.9955	0.0009
Q4/2003	2003-12-31	2203.54	309.848	429.216	450.897	317.129	282.683	91382	160.672				Q4/2003	112.73	450.897	450.897	221.735	#N/A	1.27961	Q4/2003	1.2793	1.27961	-0.000306018		450.897	0.9971	0.2822
Q1/2004	2004-03-31	2210.72	310.78	431.188	444.385	318.332	284.509	91789	164.14				Q1/2004	111.1	444.385	444.385	218.529	#N/A	-5.65298	Q1/2004	-5.6529	-5.65298	8.12925e-05		444.385	-4.4429	-1.21
Q2/2004	2004-06-30	2219.05	316.444	433.612	443.398	319.129	283.997	91527	166.692				Q2/2004	110.85	443.398	443.398	218.037	#N/A	-0.885463	Q2/2004	-0.8852	-0.885463	0.000263376		443.398	-0.6399	-0.2453
Q3/2004	2004-09-30	2231.18	318.384	435.128	446.309	320.866	286.329	91927	169.908				Q3/2004	111.58	446.309	446.309	219.473	#N/A	2.65206	Q3/2004	2.6517	2.65206	-0.00035766		446.309	2.1454	0.5063
Q4/2004	2004-12-31	2225.83	321.256	436.468	442.806	319.682	287.875	91862	171.996				Q4/2004	110.7	442.806	442.806	217.742	#N/A	-3.10276	Q4/2004	-3.1024	-3.10276	0.000359513		442.806	-3.2744	0.172
Q1/2005	2005-03-31	2234.09	319.828	437.744	442.189	323.723	286.338	92761	174.74				Q1/2005	110.54	442.189	442.189	217.427	#N/A	-0.556191	Q1/2005	-0.556	-0.556191	0.000190854		442.189	-1.7109	1.1549
Q2/2005	2005-06-30	2233.06	325.312	439.148	449.442	319.928	287.35	92393	176.928				Q2/2005	112.36	449.442	449.442	221.007	#N/A	6.72419	Q2/2005	6.7234	6.72419	-0.000792809		449.442	6.5464	0.177
Q3/2005	2005-09-30	2251.96	325.104	440.968	447.073	321.046	288.981	92225	178.256				Q3/2005	111.77	447.073	447.073	219.847	#N/A	-2.09178	Q3/2005	-2.091	-2.09178	0.000780744		447.073	0	-2.091
Q4/2005	2005-12-31	2238.75	326.696	441.168	446.777	321.495	292.193	92641	180.7				Q4/2005	111.69	446.777	446.777	219.689	#N/A	-0.264571	Q4/2005	-0.2646	-0.264571	-2.919e-05		446.777	-1.0312	0.7666
Q1/2006	2006-03-31	2257.06	328.612	444.216	449.441	319.565	293.364	92346	182.512				Q1/2006	112.36	449.441	449.441	221.007	#N/A	2.4065	Q1/2006	2.4065	2.4065	2.64542e-07		449.441	1.465	0.9415
Q2/2006	2006-06-30	2254.35	329.012	445.612	449.293	321.318	296.499	92678	184.884				Q2/2006	112.32	449.293	449.293	220.928	#N/A	-0.131654	Q2/2006	-0.1317	-0.131654	-4.5868e-05		449.293	-0.4368	0.3051
Q3/2006	2006-09-30	2264.08	330.964	445.74	451.711	319.134	297.457	92688	187.656				Q3/2006	112.92	451.711	451.711	222.109	#N/A	2.17016	Q3/2006	2.1696	2.17016	-0.000556113		451.711	2.6539	-0.4843
Q4/2006	2006-12-31	2281.01	331.104	448.66	452.253	321.337	299.321	92557	190.896				Q4/2006	113.06	452.253	452.253	222.384	#N/A	0.480817	Q4/2006	0.4814	0.480817	0.000582588		452.253	1.7519	-1.2705
Q1/2007	2007-03-31	2274.24	333.66	451.076	456.101	320.169	300.523	93052	193.332				Q1/2007	114.02	456.101	456.101	224.272	#N/A	3.44709	Q1/2007	3.447	3.44709	-8.85084e-05		456.101	2.024	1.423
Q2/2007	2007-06-30	2287.34	333.196	453.388	457.384	320.854	301.928	93731	196.3				Q2/2007	114.34	457.384	457.384	224.902	#N/A	1.12995	Q2/2007	1.1297	1.12995	-0.000245978		457.384	0.6678	0.4619
Q3/2007	2007-09-30	2306.37	334.948	455.304	455.953	319.955	306.136	93557	199.92				Q3/2007	113.99	455.953	455.953	224.213	#N/A	-1.2456	Q3/2007	-1.2454	-1.2456	0.000203977		455.953	-0.3126	-0.9328
Q4/2007	2007-12-31	2314.99	331.68	456.1	459.654	324.911	306.245	94201	202.484				Q4/2007	114.91	459.654	459.654	226.023	#N/A	3.28657	Q4/2007	3.2859	3.28657	-0.000672279		459.654	3.3698	-0.0839
Q1/2008	2008-03-31	2326.33	335.668	456.676	466.696	322.334	308.984	94329	205.88				Q1/2008	116.67	466.696	466.696	229.485	#N/A	6.27036	Q1/2008	6.2706	6.27036	0.000243056		466.696	5.6295	0.6411
Q2/2008	2008-06-30	2332.16	337.392	456.928	475.872	327.914	315.729	93202	208.788				Q2/2008	118.97	475.872	475.872	234.009	#N/A	8.09965	Q2/2008	8.0997	8.09965	4.86265e-05		475.872	4.9937	3.106
Q3/2008	2008-09-30	2366.51	342.684	459.44	471.975	322.942	315.616	93189	210.744				Q3/2008	117.99	471.975	471.975	232.081	#N/A	-3.23565	Q3/2008	-3.2359	-3.23565	-0.000247577		471.975	0.3031	-3.539
Q4/2008	2008-12-31	2390.54	343.624	462.66	476.612	325.14	320.185	93526	213.644				Q4/2008	119.15	476.612	476.612	234.363	#N/A	3.98816	Q4/2008	3.9885	3.98816	0.000336055		476.612	2.596	1.3925
Q1/2009	2009-03-31	2402.41	341.268	465.632	483.667	324.266	320.22	93784	215.56				Q1/2009	120.92	483.667	483.667	237.844	#N/A	6.05373	Q1/2009	6.0534	6.05373	-0.000327488		483.667	6.394	-0.3406
Q2/2009	2009-06-30	2444.76	342.136	469.168	486.183	325.443	322.731	95102	217.56				Q2/2009	121.55	486.183	486.183	239.083	#N/A	2.09706	Q2/2009	2.097	2.09706	-6.28476e-05		486.183	0.8535	1.2435
Q3/2009	2009-09-30	2458.38	344.172	471.712	488.995	329.491	324.446	96245	219.688				Q3/2009	122.25	488.995	488.995	240.46	#N/A	2.33368	Q3/2009	2.3337	2.33368	1.87306e-05		488.995	3.137	-0.8033
Q4/2009	2009-12-31	2462.69	346.288	474.124	489.241	323.971	327.107	96759	220.932				Q4/2009	122.31	489.241	489.241	240.578	#N/A	0.201381	Q4/2009	0.2019	0.201381	0.000519048		489.241	0.882	-0.6801
Q1/2010	2010-03-31	2449.11	343.132	474.368	494.125	327.141	330.036	95849	221.428				Q1/2010	123.53	494.125	494.125	242.978	#N/A	4.05332	Q1/2010	4.0534	4.05332	8.31244e-05		494.125	4.3548	-0.3014
Q2/2010	2010-06-30	2454.9	345.724	475.492	490.179	327.708	329.661	97416	221.728				Q2/2010	122.54	490.179	490.179	241.031	#N/A	-3.15627	Q2/2010	-3.1568	-3.15627	-0.000527398		490.179	-4.9327	1.7759
Q3/2010	2010-09-30	2449.55	345.692	476.628	494.273	328.882	330.829	97814	222				Q3/2010	123.57	494.273	494.273	243.057	#N/A	3.38291	Q3/2010	3.3835	3.38291	0.000592021		494.273	4.0144	-0.6309
Q4/2010	2010-12-31	2425.89	345.96	477.532	494.767	326.861	333.12	98217	221.792				Q4/2010	123.69	494.767	494.767	243.293	#N/A	0.400379	Q4/2010	0.3998	0.400379	-0.000578806		494.767	0.6179	-0.2181
Q1/2011	2011-03-31	2389.06	347.532	479.028	495.605	323.751	333.388	98686	222.828				Q1/2011	123.9	495.605	495.605	243.706	#N/A	0.679214	Q1/2011	0.6798	0.679214	0.000586213		495.605	-0.1087	0.7885
Q2/2011	2011-06-30	2388.53	345.336	479.928	498.023	322.16	334.65	99078	222.236				Q2/2011	124.51	498.023	498.023	244.906	#N/A	1.96588	Q2/2011	1.9654	1.96588	-0.000482785		498.023	2.9291	-0.9637
Q3/2011	2011-09-30	2375.61	344.76	481.968	497.332	319.664	336.111	99424	220.716				Q3/2011	124.33	497.332	497.332	244.552	#N/A	-0.55384	Q3/2011	-0.5536	-0.55384	0.000240445		497.332	0.2519	-0.8055
Q4/2011	2011-12-31	2366.75	345.684	483.336	500.884	321.2	336.848	99631	218.656				Q4/2011	125.22	500.884	500.884	246.302	#N/A	2.8876	Q4/2011	2.8876	2.8876	4.04897e-06		500.884	2.5393	0.3483
Q1/2012	2012-03-31	2369.1	355.396	486.196	499.194	319.107	337.083	100791	214.976				Q1/2012	124.8	499.194	499.194	245.476	#N/A	-1.3428	Q1/2012	-1.3425	-1.3428	0.000298768		499.194	1.418	-2.7605
Q2/2012	2012-06-30	2358.79	346.992	488.424	502.598	317.168	336.304	100483	211.948				Q2/2012	125.65	502.598	502.598	247.148	#N/A	2.75562	Q2/2012	2.7556	2.75562	-2.31249e-05		502.598	-1.9778	4.7334
Q3/2012	2012-09-30	2361.74	349.32	489.816	504.67	318.095	338.602	100795	209.236				Q3/2012	126.17	504.67	504.67	248.171	#N/A	1.65926	Q3/2012	1.6593	1.65926	4.29181e-05		504.67	2.4177	-0.7584
Q4/2012	2012-12-31	2346.62	349.976	491.164	506.348	314.664	338.354	101406	206.772				Q4/2012	126.59	506.348	506.348	248.997	#N/A	1.33663	Q4/2012	1.336	1.33663	-0.000625877		506.348	0.2847	1.0513
Q1/2013	2013-03-31	2322.99	348.072	493.064	508.235	316.745	335.128	101408	205.952				Q1/2013	127.06	508.235	508.235	249.921	#N/A	1.49903	Q1/2013	1.4991	1.49903	7.1967e-05		508.235	0.8285	0.6706
Q2/2013	2013-06-30	2312.22	350.64	495.86	507.791	318.052	333.515	102649	206.08				Q2/2013	126.95	507.791	507.791	249.705	#N/A	-0.348987	Q2/2013	-0.349	-0.348987	-1.3005e-05		507.791	-1.6208	1.2718
Q3/2013	2013-09-30	2296.15	351.26	497.128	511.293	315.097	335.03	102664	206.176				Q3/2013	127.82	511.293	511.293	251.416	#N/A	2.78728	Q3/2013	2.7878	2.78728	0.000515968		511.293	4.8191	-2.0313
Q4/2013	2013-12-31	2281.69	354.292	498.484	512.724	315.23	337.175	102808	206.96				Q4/2013	128.18	512.724	512.724	252.124	#N/A	1.12422	Q4/2013	1.1239	1.12422	-0.000323342		512.724	-0.0704	1.1943
Q1/2014	2014-03-31	2288.69	356.776	500.024	513.316	314.596	337.649	103019	206.448				Q1/2014	128.33	513.316	513.316	252.419	#N/A	0.462647	Q1/2014	0.4626	0.462647	-4.74201e-05		513.316	1.708	-1.2454
Q2/2014	2014-06-30	2286.8	360.672	501.632	515.585	312.622	336.919	102537	205.176				Q2/2014	128.9	515.585	515.585	253.541	#N/A	1.77987	Q2/2014	1.7802	1.77987	0.000330444		515.585	1.7415	0.0387
Q3/2014	2014-09-30	2301.18	361.904	503.536	519.631	314.422	337.254	102979	205.348				Q3/2014	129.91	519.631	519.631	255.527	#N/A	3.1761	Q3/2014	3.1756	3.1761	-0.000501321		519.631	1.7693	1.4063
Q4/2014	2014-12-31	2292.76	360.184	505.46	523.084	314.447	336.01	103216	205.324				Q4/2014	130.77	523.084	523.084	257.219	#N/A	2.68465	Q4/2014	2.6849	2.68465	0.000247988		523.084	1.7913	0.8936
Q1/2015	2015-03-31	2309.65	360.044	506.54	526.55	312.315	341.106	104076	208.136				Q1/2015	131.63	526.55	526.55	258.91	#N/A	2.67689	Q1/2015	2.6766	2.67689	-0.000294306		526.55	1.6	1.0766
Q2/2015	2015-06-30	2319.07	362.368	507.464	529.411	311.96	340.937	104135	209.432				Q2/2015	132.35	529.411	529.411	260.327	#N/A	2.19117	Q2/2015	2.1915	2.19117	0.000329272		529.411	1.6	0.5915
Q3/2015	2015-09-30	2327.14	363.568	508.516	534.887	312.688	343.182	104499	210.644				Q3/2015	133.72	534.887	534.887	263.021	#N/A	4.20207	Q3/2015	4.2022	4.20207	0.000134325		534.887	1.6	2.6022
Q4/2015	2015-12-31	2335.72	362.268	510.344	539.919	312.002	344.03	105387	211.224				Q4/2015	134.98	539.919	539.919	265.5	#N/A	3.81647	Q4/2015	3.8166	3.81647	0.000126676		539.919	1.6	2.2166
Q1/2016	2016-03-31	2337.95	365.764	512.264	548.047	315.037	347.666	106651	211.384				Q1/2016	137.01	548.047	548.047	269.493	#N/A	6.15899	Q1/2016	6.1586	6.15899	-0.000389522
Q2/2016	2016-06-30	2341.87	364.836	513.616	551.994	314.044	350.973	105415	211.356				Q2/2016	138	551.994	551.994	271.44	#N/A	2.91205	Q2/2016	2.9118	2.91205	-0.000245251
Q3/2016	2016-09-30	2352.49	364.896	515.156	553.079	313.159	350.144	105866	212.392				Q3/2016	138.27	553.079	553.079	271.971	#N/A	0.788562	Q3/2016	0.7889	0.788562	0.000338378
Q4/2016	2016-12-31	2349.25	364.952	516.996	555.94	313.884	351.162	105648	211.208				Q4/2016	138.99	555.94	555.94	273.387	#N/A	2.08525	Q4/2016	2.0855	2.08525	0.000245646
Q1/2017	2017-03-31	2339.5	364.44	518.96	557.568	314.453	354.569	105898	213.488				Q1/2017	139.1	557.568	557.568	273.603	#N/A	1.1765	Q1/2017	1.1765	1.1765	-4.70135e-06
Q2/2017	2017-06-30	2341.82	365.612	521.52	559.443	314.406	355.841	106100	214.472				Q2/2017	139.86	559.443	559.443	275.098	#N/A	1.35193	Q2/2017	1.3517	1.35193	-0.000227764
Q3/2017	2017-09-30	2351.25	365.348	524.372	562.107	314.219	358.993	106142	215.352				Q3/2017	140.6	562.107	562.107	276.554	#N/A	1.9184	Q3/2017	1.9184	1.9184	-2.29383e-07
Q4/2017	2017-12-31	2358.8	366.988	526.264	564.919	314.422	361.512	106142	216.284				Q4/2017	141.21	564.919	564.919	277.754	#N/A	2.01611	Q4/2017	2.0161	2.01611	-8.28867e-06
Q1/2018	2018-03-31	2365.64	368.956	528.004	564.212	315.206	363.039	106178	216.803				Q1/2018	140.47	564.212	564.212	276.298	#N/A	-0.499664	Q1/2018	-0.5	-0.499664	-0.000336237
Q2/2018	2018-06-30	2385.49	370.137	529.588	566.734	315.836	364.572	106550	217.262				Q2/2018		566.734	566.734	0	#N/A	1.8	Q2/2018	1.8	1.8	-4.44635e-06
Q3/2018	2018-09-30	2410.77	371.247	530.912	569.407	316.151	366.202	106715	217.776				Q3/2018		569.407	569.407	0	#N/A	1.89999	Q3/2018	1.9	1.89999	1.14112e-05
Q4/2018	2018-12-31	2436.39	372.361	532.103	572.092	316.467	367.838	106760	218.319				Q4/2018		572.092	572.092	0	#N/A	1.89956	Q4/2018	1.9	1.89956	0.000444024
Q1/2019	2019-03-31	2462.36	373.106	533.167	574.931	316.546	369.483	106910	218.917				Q1/2019		574.931	574.931	0	#N/A	1.99982	Q1/2019	2	1.99982	0.00017986
Q2/2019	2019-06-30	2488.72	373.852	534.02	577.785	316.625	371.134	107140	219.574				Q2/2019		577.785	577.785	0	#N/A	2.00046	Q2/2019	2	2.00046	-0.000463789
Q3/2019	2019-09-30	2515.47	374.599	534.447	580.795	316.704	372.793	107370	220.232				Q3/2019		580.795	580.795	0	#N/A	2.10016	Q3/2019	2.1	2.10016	-0.000160382
Q4/2019	2019-12-31	2542.61	375.349	534.768	583.82	316.783	374.46	107600	220.959				Q4/2019		583.82	583.82	0	#N/A	2.09968	Q4/2019	2.1	2.09968	0.00031582

[truncated: 5 more sheets: EXP, IMP, Total GDP, Shares (Q), Figure5.Import Share]
